# Supplementary material for: Structural Diversity and Carbon Dioxide Sorption Selectivity of Zinc(II) Metal-Organic Frameworks Based on Bis(1,2,4-triazol-1-yl)methane and Terephthalic Acid
Source: Molecules. 2022 Oct 1;27(19):6481. doi: 10.3390/molecules27196481 (PMC9571910; doi:10.3390/molecules27196481)

## checkCIF/PLATON report

Structure factors have been supplied for datablock(s) tgs125

THIS REPORT IS FOR GUIDANCE ONLY. IF USED AS PART OF A REVIEW PROCEDURE FOR PUBLICATION, IT SHOULD NOT REPLACE THE EXPERTISE OF AN EXPERIENCED CRYSTALLOGRAPHIC REFEREE.

No syntax errors found.      CIF dictionary      Interpreting this report

### Datablock: tgs125

---

Bond precision:      C-C = 0.0075 Å      Wavelength=0.71073

Cell:                      a=9.7232(13)                      b=18.204(3)                      c=18.626(3)  
                             alpha=117.577(4)                      beta=102.500(5)                      gamma=92.264(5)  
Temperature:      150 K

|                        | Calculated                                                          | Reported                                           |
|------------------------|---------------------------------------------------------------------|----------------------------------------------------|
| Volume                 | 2815.6(8)                                                           | 2815.6(7)                                          |
| Space group            | P -1                                                                | P -1                                               |
| Hall group             | -P 1                                                                | -P 1                                               |
| Moiety formula         | 2(C32 H25 N7 O13 Zn3),<br>8(C1.50 H3.50 N0.50 O0.50)<br>[+ solvent] | C32 H25 N7 O13 Zn3, 3.5(C3<br>H7 N O), [C3 H7 N O] |
| Sum formula            | C85 H99 N21 O33 Zn6 [+<br>solvent]                                  | C45.50 H56.50 N11.50 O17.50<br>Zn3                 |
| Mr                     | 2335.19                                                             | 1240.67                                            |
| Dx, g cm <sup>-3</sup> | 1.377                                                               | 1.463                                              |
| Z                      | 1                                                                   | 2                                                  |
| Mu (mm <sup>-1</sup> ) | 1.338                                                               | 1.338                                              |
| F000                   | 1200.0                                                              | 1200.0                                             |
| F000'                  | 1202.20                                                             |                                                    |
| h, k, lmax             | 11, 22, 22                                                          | 11, 22, 22                                         |
| Nref                   | 10862                                                               | 10769                                              |
| Tmin, Tmax             | 0.676, 0.875                                                        | 0.603, 0.745                                       |
| Tmin'                  | 0.620                                                               |                                                    |

Correction method= # Reported T Limits: Tmin=0.603 Tmax=0.745  
AbsCorr = MULTII-SCAN

Data completeness= 0.991

Theta(max)= 25.819

R(reflections)= 0.0577( 9205)

wR2(reflections)=  
0.1782( 10769)

S = 1.060

Npar= 601

The following ALERTS were generated. Each ALERT has the format

**test-name\_ALERT\_alert-type\_alert-level.**

Click on the hyperlinks for more details of the test.

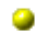

### Alert level C

|                   |                                                  |        |        |
|-------------------|--------------------------------------------------|--------|--------|
| PLAT202_ALERT_3_C | Isotropic non-H Atoms in Anion/Solvent .....     | 14     | Check  |
|                   | N10 C39 C40 C41 O15 N9                           | etc.   |        |
| PLAT220_ALERT_2_C | NonSolvent Resd 1 C Ueq(max)/Ueq(min) Range      | 5.8    | Ratio  |
| PLAT220_ALERT_2_C | NonSolvent Resd 1 N Ueq(max)/Ueq(min) Range      | 3.2    | Ratio  |
| PLAT220_ALERT_2_C | NonSolvent Resd 1 O Ueq(max)/Ueq(min) Range      | 3.2    | Ratio  |
| PLAT222_ALERT_3_C | NonSolvent Resd 1 H Uiso(max)/Uiso(min) Range    | 5.6    | Ratio  |
| PLAT241_ALERT_2_C | High 'MainMol' Ueq as Compared to Neighbors of   | 06     | Check  |
| PLAT241_ALERT_2_C | High 'MainMol' Ueq as Compared to Neighbors of   | 07     | Check  |
| PLAT241_ALERT_2_C | High 'MainMol' Ueq as Compared to Neighbors of   | N5     | Check  |
| PLAT241_ALERT_2_C | High 'MainMol' Ueq as Compared to Neighbors of   | N6     | Check  |
| PLAT242_ALERT_2_C | Low 'MainMol' Ueq as Compared to Neighbors of    | Zn4    | Check  |
| PLAT242_ALERT_2_C | Low 'MainMol' Ueq as Compared to Neighbors of    | N1     | Check  |
| PLAT243_ALERT_4_C | High 'Solvent' Ueq as Compared to Neighbors of   | C37    | Check  |
| PLAT243_ALERT_4_C | High 'Solvent' Ueq as Compared to Neighbors of   | C42    | Check  |
| PLAT244_ALERT_4_C | Low 'Solvent' Ueq as Compared to Neighbors of    | N10    | Check  |
| PLAT244_ALERT_4_C | Low 'Solvent' Ueq as Compared to Neighbors of    | C40    | Check  |
| PLAT244_ALERT_4_C | Low 'Solvent' Ueq as Compared to Neighbors of    | N9     | Check  |
| PLAT244_ALERT_4_C | Low 'Solvent' Ueq as Compared to Neighbors of    | N11    | Check  |
| PLAT309_ALERT_2_C | Single Bonded Oxygen (C-O > 1.3 Ang) .....       | 016    | Check  |
| PLAT317_ALERT_2_C | Too many H on C in C=N Moiety in Solvent/Ion ... | C36    | Check  |
| PLAT341_ALERT_3_C | Low Bond Precision on C-C Bonds .....            | 0.0075 | Ang.   |
| PLAT911_ALERT_3_C | Missing FCF Refl Between Thmin & STh/L= 0.600    | 11     | Report |
| PLAT918_ALERT_3_C | Reflection(s) with I(obs) much Smaller I(calc) . | 3      | Check  |
| PLAT971_ALERT_2_C | Check Calcd Resid. Dens. 1.54Ang From N11        | 1.97   | eA-3   |
| PLAT971_ALERT_2_C | Check Calcd Resid. Dens. 1.09Ang From N3         | 1.73   | eA-3   |
| PLAT975_ALERT_2_C | Check Calcd Resid. Dens. 0.94Ang From O17 .      | 1.32   | eA-3   |

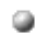

### Alert level G

FORMU01\_ALERT\_1\_G There is a discrepancy between the atom counts in the  
\_chemical\_formula\_sum and \_chemical\_formula\_moiety. This is  
usually due to the moiety formula being in the wrong format.  
Atom count from \_chemical\_formula\_sum: C45.5 H56.5 N11.5 O17.5 Zn3  
Atom count from \_chemical\_formula\_moiety: C42.5 H49.5 N10.5 O16.5 Zn3

FORMU01\_ALERT\_2\_G There is a discrepancy between the atom counts in the  
\_chemical\_formula\_sum and the formula from the \_atom\_site\* data.  
Atom count from \_chemical\_formula\_sum: C45.5 H56.5 N11.5 O17.5 Zn3  
Atom count from the \_atom\_site data: C42.5 H49.5 N10.5 O16.5 Zn3

CELLZ01\_ALERT\_1\_G Difference between formula and atom\_site contents detected.  
CELLZ01\_ALERT\_1\_G ALERT: Large difference may be due to a  
symmetry error - see SYMMG tests  
From the CIF: \_cell\_formula\_units\_Z 2  
From the CIF: \_chemical\_formula\_sum C45.50 H56.50 N11.50 O17.50 Zn3  
TEST: Compare cell contents of formula and atom\_site data

| atom | Z*formula | cif sites | diff  |
|------|-----------|-----------|-------|
| C    | 91.00     | 85.00     | 6.00  |
| H    | 113.00    | 99.00     | 14.00 |
| N    | 23.00     | 21.00     | 2.00  |
| O    | 35.00     | 33.00     | 2.00  |
| Zn   | 6.00      | 6.00      | 0.00  |

  

|                   |                                                  |       |              |
|-------------------|--------------------------------------------------|-------|--------------|
| PLAT002_ALERT_2_G | Number of Distance or Angle Restraints on AtSite | 12    | Note         |
| PLAT003_ALERT_2_G | Number of Uiso or Uij Restrained non-H Atoms ... | 9     | Report       |
| PLAT004_ALERT_5_G | Polymeric Structure Found with Maximum Dimension | 3     | Info         |
| PLAT041_ALERT_1_G | Calc. and Reported SumFormula Strings Differ     |       | Please Check |
| PLAT042_ALERT_1_G | Calc. and Reported MoietyFormula Strings Differ  |       | Please Check |
| PLAT045_ALERT_1_G | Calculated and Reported Z Differ by a Factor ... | 0.500 | Check        |
| PLAT072_ALERT_2_G | SHELXL First Parameter in WGHT Unusually Large   | 0.11  | Report       |
| PLAT083_ALERT_2_G | SHELXL Second Parameter in WGHT Unusually Large  | 8.11  | Why ?        |
| PLAT171_ALERT_4_G | The CIF-Embedded .res File Contains EADP Records | 3     | Report       |
| PLAT172_ALERT_4_G | The CIF-Embedded .res File Contains DFIX Records | 4     | Report       |
| PLAT187_ALERT_4_G | The CIF-Embedded .res File Contains RIGU Records | 2     | Report       |
| PLAT300_ALERT_4_G | Atom Site Occupancy of O16 Constrained at        | 0.5   | Check        |
| PLAT300_ALERT_4_G | Atom Site Occupancy of O20 Constrained at        | 0.5   | Check        |
| PLAT300_ALERT_4_G | Atom Site Occupancy of H40 Constrained at        | 0.5   | Check        |
| PLAT300_ALERT_4_G | Atom Site Occupancy of H40A Constrained at       | 0.5   | Check        |
| PLAT300_ALERT_4_G | Atom Site Occupancy of O18 Constrained at        | 0.5   | Check        |
| PLAT300_ALERT_4_G | Atom Site Occupancy of N12 Constrained at        | 0.5   | Check        |
| PLAT300_ALERT_4_G | Atom Site Occupancy of C45 Constrained at        | 0.5   | Check        |
| PLAT300_ALERT_4_G | Atom Site Occupancy of C46 Constrained at        | 0.5   | Check        |
| PLAT300_ALERT_4_G | Atom Site Occupancy of C47 Constrained at        | 0.5   | Check        |
| PLAT300_ALERT_4_G | Atom Site Occupancy of H45A Constrained at       | 0.5   | Check        |
| PLAT300_ALERT_4_G | Atom Site Occupancy of H45B Constrained at       | 0.5   | Check        |
| PLAT300_ALERT_4_G | Atom Site Occupancy of H45C Constrained at       | 0.5   | Check        |
| PLAT300_ALERT_4_G | Atom Site Occupancy of H46 Constrained at        | 0.5   | Check        |
| PLAT300_ALERT_4_G | Atom Site Occupancy of H47A Constrained at       | 0.5   | Check        |
| PLAT300_ALERT_4_G | Atom Site Occupancy of H47B Constrained at       | 0.5   | Check        |
| PLAT300_ALERT_4_G | Atom Site Occupancy of H47C Constrained at       | 0.5   | Check        |
| PLAT301_ALERT_3_G | Main Residue Disorder .....(Resd 1 )             | 7%    | Note         |
| PLAT302_ALERT_4_G | Anion/Solvent/Minor-Residue Disorder (Resd 2 )   | 20%   | Note         |
| PLAT302_ALERT_4_G | Anion/Solvent/Minor-Residue Disorder (Resd 5 )   | 100%  | Note         |
| PLAT412_ALERT_2_G | Short Intra XH3 .. XHn H40A ..H41B .             | 2.09  | Ang.         |
|                   | x,y,z =                                          | 1_555 | Check        |
| PLAT413_ALERT_2_G | Short Inter XH3 .. XHn H38C ..H35C .             | 2.04  | Ang.         |
|                   | 3-x,2-y,1-z =                                    | 2_876 | Check        |
| PLAT605_ALERT_4_G | Largest Solvent Accessible VOID in the Structure | 282   | A**3         |
| PLAT789_ALERT_4_G | Atoms with Negative _atom_site_disorder_group #  | 12    | Check        |
| PLAT794_ALERT_5_G | Tentative Bond Valency for Zn1 (II) .            | 2.14  | Info         |
| PLAT794_ALERT_5_G | Tentative Bond Valency for Zn2 (II) .            | 2.11  | Info         |
| PLAT794_ALERT_5_G | Tentative Bond Valency for Zn3 (II) .            | 2.04  | Info         |
| PLAT860_ALERT_3_G | Number of Least-Squares Restraints .....         | 51    | Note         |
| PLAT910_ALERT_3_G | Missing # of FCF Reflection(s) Below Theta(Min). | 3     | Note         |
| PLAT912_ALERT_4_G | Missing # of FCF Reflections Above STh/L= 0.600  | 80    | Note         |
| PLAT933_ALERT_2_G | Number of HKL-OMIT Records in Embedded .res File | 6     | Note         |
| PLAT941_ALERT_3_G | Average HKL Measurement Multiplicity .....       | 3.5   | Low          |
| PLAT978_ALERT_2_G | Number C-C Bonds with Positive Residual Density. | 0     | Info         |

---

0 **ALERT level A** = Most likely a serious problem - resolve or explain  
 0 **ALERT level B** = A potentially serious problem, consider carefully  
 25 **ALERT level C** = Check. Ensure it is not caused by an omission or oversight  
 47 **ALERT level G** = General information/check it is not something unexpected

6 ALERT type 1 CIF construction/syntax error, inconsistent or missing data  
23 ALERT type 2 Indicator that the structure model may be wrong or deficient  
9 ALERT type 3 Indicator that the structure quality may be low  
30 ALERT type 4 Improvement, methodology, query or suggestion  
4 ALERT type 5 Informative message, check

---

It is advisable to attempt to resolve as many as possible of the alerts in all categories. Often the minor alerts point to easily fixed oversights, errors and omissions in your CIF or refinement strategy, so attention to these fine details can be worthwhile. In order to resolve some of the more serious problems it may be necessary to carry out additional measurements or structure refinements. However, the purpose of your study may justify the reported deviations and the more serious of these should normally be commented upon in the discussion or experimental section of a paper or in the "special\_details" fields of the CIF. checkCIF was carefully designed to identify outliers and unusual parameters, but every test has its limitations and alerts that are not important in a particular case may appear. Conversely, the absence of alerts does not guarantee there are no aspects of the results needing attention. It is up to the individual to critically assess their own results and, if necessary, seek expert advice.

### **Publication of your CIF in IUCr journals**

A basic structural check has been run on your CIF. These basic checks will be run on all CIFs submitted for publication in IUCr journals (*Acta Crystallographica*, *Journal of Applied Crystallography*, *Journal of Synchrotron Radiation*); however, if you intend to submit to *Acta Crystallographica Section C* or *E* or *IUCrData*, you should make sure that full publication checks are run on the final version of your CIF prior to submission.

### **Publication of your CIF in other journals**

Please refer to the *Notes for Authors* of the relevant journal for any special instructions relating to CIF submission.

---

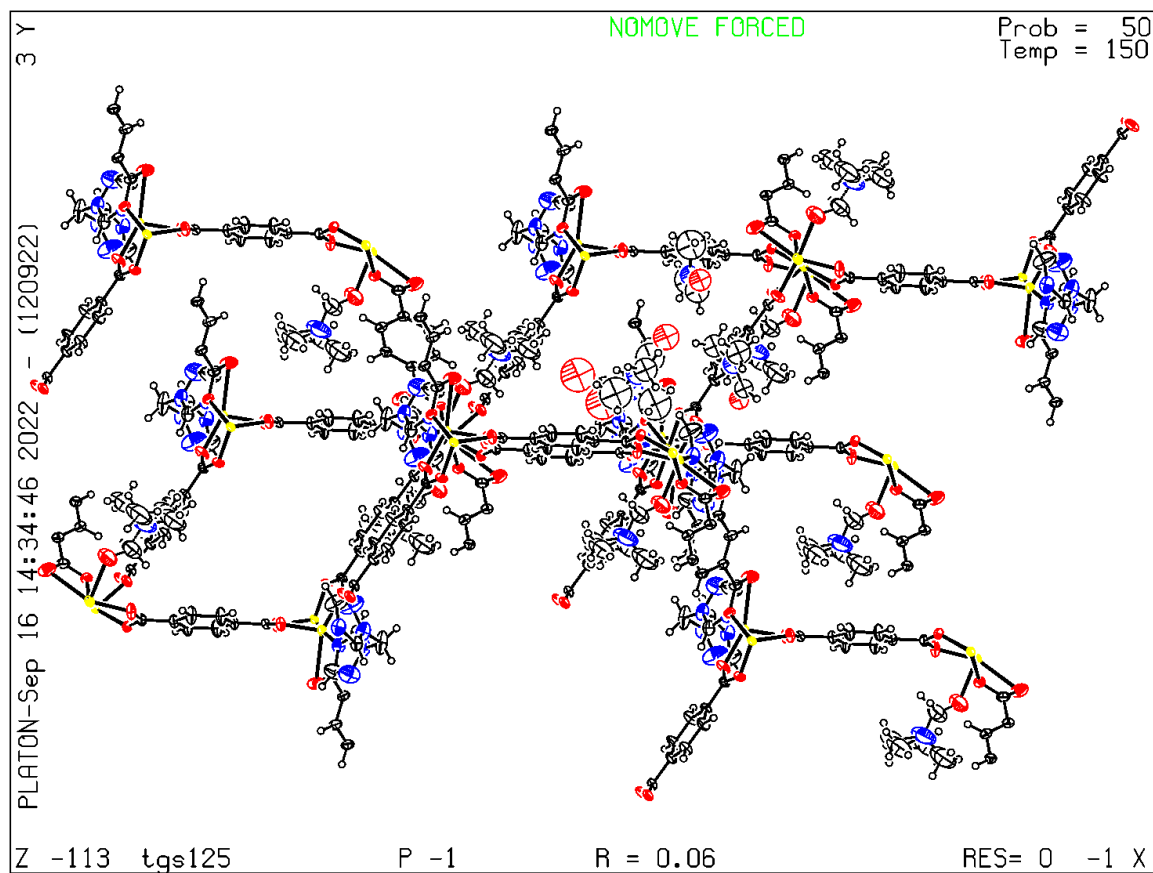

Supplement: Supplementary file 1 [file molecules-27-06481-s001.zip › 1.pdf]
