# Supplementary material for: Structural Diversity and Carbon Dioxide Sorption Selectivity of Zinc(II) Metal-Organic Frameworks Based on Bis(1,2,4-triazol-1-yl)methane and Terephthalic Acid
Source: Molecules. 2022 Oct 1;27(19):6481. doi: 10.3390/molecules27196481 (PMC9571910; doi:10.3390/molecules27196481)

## checkCIF/PLATON report

Structure factors have been supplied for datablock(s) tgs142

THIS REPORT IS FOR GUIDANCE ONLY. IF USED AS PART OF A REVIEW PROCEDURE FOR PUBLICATION, IT SHOULD NOT REPLACE THE EXPERTISE OF AN EXPERIENCED CRYSTALLOGRAPHIC REFEREE.

No syntax errors found.      CIF dictionary      Interpreting this report

### Datablock: tgs142

---

Bond precision:      C-C = 0.0107 Å      Wavelength=0.71073

Cell:                      a=20.1879(7)              b=18.2491(6)              c=32.9335(10)  
                                alpha=90              beta=90              gamma=90

Temperature:              298 K

|                        | Calculated                        | Reported                            |
|------------------------|-----------------------------------|-------------------------------------|
| Volume                 | 12133.1(7)                        | 12133.1(7)                          |
| Space group            | P b c a                           | P b c a                             |
| Hall group             | -P 2ac 2ab                        | -P 2ac 2ab                          |
| Moiety formula         | C29 H18 N6 O12 Zn3 [+<br>solvent] | C29 H18 N6 O12 Zn3, 8[C3 H7<br>N O] |
| Sum formula            | C29 H18 N6 O12 Zn3 [+<br>solvent] | C53 H74 N14 O20 Zn3                 |
| Mr                     | 838.66                            | 1423.40                             |
| Dx, g cm <sup>-3</sup> | 0.918                             | 1.558                               |
| Z                      | 8                                 | 8                                   |
| Mu (mm <sup>-1</sup> ) | 1.215                             | 1.215                               |
| F000                   | 3360.0                            | 3360.0                              |
| F000'                  | 3368.22                           |                                     |
| h, k, lmax             | 23, 21, 38                        | 23, 21, 38                          |
| Nref                   | 9988                              | 9982                                |
| Tmin, Tmax             | 0.864, 0.886                      | 0.570, 0.745                        |
| Tmin'                  | 0.784                             |                                     |

Correction method= # Reported T Limits: Tmin=0.570 Tmax=0.745

AbsCorr = MULTI-SCAN

Data completeness= 0.999

Theta(max)= 24.405

R(reflections)= 0.0788( 8234)

wR2(reflections)=  
0.2172( 9982)

S = 1.059

Npar= 451

The following ALERTS were generated. Each ALERT has the format

**test-name\_ALERT\_alert-type\_alert-level.**

Click on the hyperlinks for more details of the test.

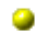

### Alert level C

ABSMU01\_ALERT\_1\_C The ratio of given/expected absorption coefficient lies  
outside the range 0.99 <> 1.01  
Calculated value of mu = 1.263  
Value of mu given = 1.215

THETM01\_ALERT\_3\_C The value of sine(theta\_max)/wavelength is less than 0.590  
Calculated sin(theta\_max)/wavelength = 0.5814

PLAT213\_ALERT\_2\_C Atom C28 has ADP max/min Ratio ..... 3.4 prolat

PLAT220\_ALERT\_2\_C NonSolvent Resd 1 C Ueq(max)/Ueq(min) Range 3.5 Ratio

PLAT241\_ALERT\_2\_C High 'MainMol' Ueq as Compared to Neighbors of 05 Check

PLAT241\_ALERT\_2\_C High 'MainMol' Ueq as Compared to Neighbors of 06 Check

PLAT241\_ALERT\_2\_C High 'MainMol' Ueq as Compared to Neighbors of 07 Check

PLAT241\_ALERT\_2\_C High 'MainMol' Ueq as Compared to Neighbors of 08 Check

PLAT241\_ALERT\_2\_C High 'MainMol' Ueq as Compared to Neighbors of 09 Check

PLAT241\_ALERT\_2\_C High 'MainMol' Ueq as Compared to Neighbors of 010 Check

PLAT241\_ALERT\_2\_C High 'MainMol' Ueq as Compared to Neighbors of N4 Check

PLAT241\_ALERT\_2\_C High 'MainMol' Ueq as Compared to Neighbors of N6 Check

PLAT241\_ALERT\_2\_C High 'MainMol' Ueq as Compared to Neighbors of C26 Check

PLAT241\_ALERT\_2\_C High 'MainMol' Ueq as Compared to Neighbors of C28 Check

PLAT241\_ALERT\_2\_C High 'MainMol' Ueq as Compared to Neighbors of C29 Check

PLAT242\_ALERT\_2\_C Low 'MainMol' Ueq as Compared to Neighbors of Zn1 Check

PLAT242\_ALERT\_2\_C Low 'MainMol' Ueq as Compared to Neighbors of Zn2 Check

PLAT242\_ALERT\_2\_C Low 'MainMol' Ueq as Compared to Neighbors of Zn3 Check

PLAT242\_ALERT\_2\_C Low 'MainMol' Ueq as Compared to Neighbors of N1 Check

PLAT242\_ALERT\_2\_C Low 'MainMol' Ueq as Compared to Neighbors of N2 Check

PLAT242\_ALERT\_2\_C Low 'MainMol' Ueq as Compared to Neighbors of N3 Check

PLAT242\_ALERT\_2\_C Low 'MainMol' Ueq as Compared to Neighbors of C11 Check

PLAT334\_ALERT\_2\_C Small <C-C> Benzene Dist. C7 -C24 . 1.37 Ang.

PLAT341\_ALERT\_3\_C Low Bond Precision on C-C Bonds ..... 0.01067 Ang.

PLAT911\_ALERT\_3\_C Missing FCF Refl Between Thmin & STh/L= 0.581 7 Report

PLAT918\_ALERT\_3\_C Reflection(s) with I(obs) much Smaller I(calc) . 4 Check

PLAT975\_ALERT\_2\_C Check Calcd Resid. Dens. 1.08Ang From O3 . 0.58 eA-3

PLAT975\_ALERT\_2\_C Check Calcd Resid. Dens. 0.92Ang From O8 . 0.56 eA-3

PLAT977\_ALERT\_2\_C Check Negative Difference Density on H21 . -0.31 eA-3

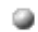

### Alert level G

FORMU01\_ALERT\_2\_G There is a discrepancy between the atom counts in the  
\_chemical\_formula\_sum and the formula from the \_atom\_site\* data.  
Atom count from \_chemical\_formula\_sum: C53 H74 N14 O20 Zn3  
Atom count from the \_atom\_site data: C29 H18 N6 O12 Zn3

CELLZ01\_ALERT\_1\_G Difference between formula and atom\_site contents detected.

CELLZ01\_ALERT\_1\_G ALERT: Large difference may be due to a  
symmetry error - see SYMMG tests  
From the CIF: \_cell\_formula\_units\_Z 8  
From the CIF: \_chemical\_formula\_sum C53 H74 N14 O20 Zn3

TEST: Compare cell contents of formula and atom\_site data

| atom | Z*formula | cif sites | diff   |  |
|------|-----------|-----------|--------|--|
| C    | 424.00    | 232.00    | 192.00 |  |
| H    | 592.00    | 144.00    | 448.00 |  |
| N    | 112.00    | 48.00     | 64.00  |  |
| O    | 160.00    | 96.00     | 64.00  |  |
| Zn   | 24.00     | 24.00     | 0.00   |  |

  

|                   |                                                  |       |              |
|-------------------|--------------------------------------------------|-------|--------------|
| PLAT003_ALERT_2_G | Number of Uiso or Uij Restrained non-H Atoms ... | 11    | Report       |
| PLAT004_ALERT_5_G | Polymeric Structure Found with Maximum Dimension | 3     | Info         |
| PLAT041_ALERT_1_G | Calc. and Reported SumFormula Strings Differ     |       | Please Check |
| PLAT083_ALERT_2_G | SHELXL Second Parameter in WGHT Unusually Large  | 88.50 | Why ?        |
| PLAT187_ALERT_4_G | The CIF-Embedded .res File Contains RIGU Records | 1     | Report       |
| PLAT606_ALERT_4_G | Solvent Accessible VOID(S) in Structure .....    |       | ! Info       |
| PLAT794_ALERT_5_G | Tentative Bond Valency for Zn1 (II) .            | 2.19  | Info         |
| PLAT794_ALERT_5_G | Tentative Bond Valency for Zn2 (II) .            | 2.07  | Info         |
| PLAT794_ALERT_5_G | Tentative Bond Valency for Zn3 (II) .            | 2.19  | Info         |
| PLAT860_ALERT_3_G | Number of Least-Squares Restraints .....         | 81    | Note         |
| PLAT909_ALERT_3_G | Percentage of I>2sig(I) Data at Theta(Max) Still | 60%   | Note         |
| PLAT910_ALERT_3_G | Missing # of FCF Reflection(s) Below Theta(Min). | 1     | Note         |
| PLAT913_ALERT_3_G | Missing # of Very Strong Reflections in FCF .... | 1     | Note         |
| PLAT933_ALERT_2_G | Number of HKL-OMIT Records in Embedded .res File | 2     | Note         |
| PLAT978_ALERT_2_G | Number C-C Bonds with Positive Residual Density. | 0     | Info         |

---

0 **ALERT level A** = Most likely a serious problem - resolve or explain  
0 **ALERT level B** = A potentially serious problem, consider carefully  
29 **ALERT level C** = Check. Ensure it is not caused by an omission or oversight  
18 **ALERT level G** = General information/check it is not something unexpected

4 ALERT type 1 CIF construction/syntax error, inconsistent or missing data  
29 ALERT type 2 Indicator that the structure model may be wrong or deficient  
8 ALERT type 3 Indicator that the structure quality may be low  
2 ALERT type 4 Improvement, methodology, query or suggestion  
4 ALERT type 5 Informative message, check

---

---

It is advisable to attempt to resolve as many as possible of the alerts in all categories. Often the minor alerts point to easily fixed oversights, errors and omissions in your CIF or refinement strategy, so attention to these fine details can be worthwhile. In order to resolve some of the more serious problems it may be necessary to carry out additional measurements or structure refinements. However, the purpose of your study may justify the reported deviations and the more serious of these should normally be commented upon in the discussion or experimental section of a paper or in the "special\_details" fields of the CIF. checkCIF was carefully designed to identify outliers and unusual parameters, but every test has its limitations and alerts that are not important in a particular case may appear. Conversely, the absence of alerts does not guarantee there are no aspects of the results needing attention. It is up to the individual to critically assess their own results and, if necessary, seek expert advice.

### **Publication of your CIF in IUCr journals**

A basic structural check has been run on your CIF. These basic checks will be run on all CIFs submitted for publication in IUCr journals (*Acta Crystallographica*, *Journal of Applied Crystallography*, *Journal of Synchrotron Radiation*); however, if you intend to submit to *Acta Crystallographica Section C* or *E* or *IUCrData*, you should make sure that full publication checks are run on the final version of your CIF prior to submission.

### **Publication of your CIF in other journals**

Please refer to the *Notes for Authors* of the relevant journal for any special instructions relating to CIF submission.

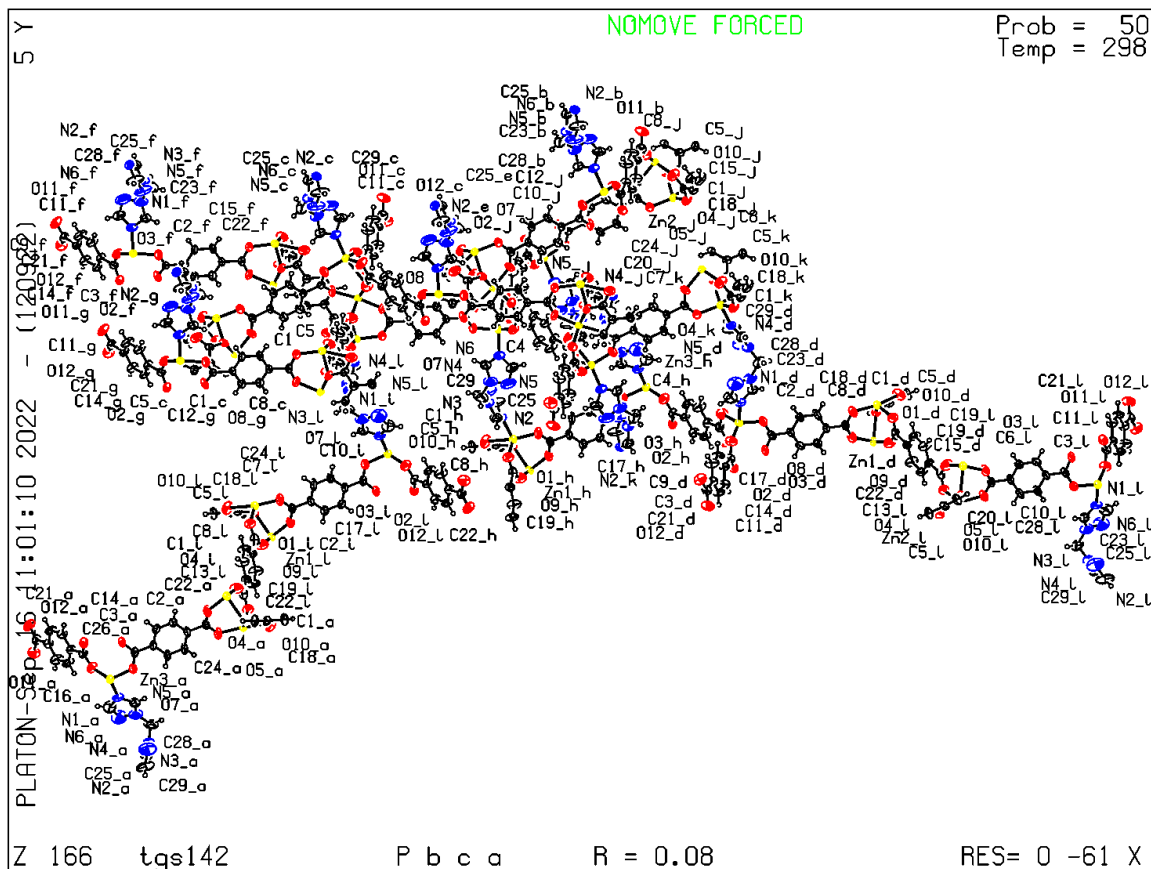

Supplement: Supplementary file 1 [file molecules-27-06481-s001.zip › 2.pdf]
