# Supplementary material for: Structural Diversity and Carbon Dioxide Sorption Selectivity of Zinc(II) Metal-Organic Frameworks Based on Bis(1,2,4-triazol-1-yl)methane and Terephthalic Acid
Source: Molecules. 2022 Oct 1;27(19):6481. doi: 10.3390/molecules27196481 (PMC9571910; doi:10.3390/molecules27196481)

## checkCIF/PLATON report

Structure factors have been supplied for datablock(s) tgs232\_1

THIS REPORT IS FOR GUIDANCE ONLY. IF USED AS PART OF A REVIEW PROCEDURE FOR PUBLICATION, IT SHOULD NOT REPLACE THE EXPERTISE OF AN EXPERIENCED CRYSTALLOGRAPHIC REFEREE.

No syntax errors found.      CIF dictionary      Interpreting this report

### Datablock: tgs232\_1

---

Bond precision:      C-C = 0.0101 Å      Wavelength=0.71073

Cell:                      a=23.893(3)              b=16.604(3)              c=17.746(3)  
                                alpha=90              beta=124.479(7)              gamma=90

Temperature:              298 K

|                        | Calculated                      | Reported                          |
|------------------------|---------------------------------|-----------------------------------|
| Volume                 | 5803.5(17)                      | 5803.7(14)                        |
| Space group            | C 2/c                           | C 1 2/c 1                         |
| Hall group             | -C 2yc                          | -C 2yc                            |
| Moiety formula         | C13 H10 N6 O4 Zn [+<br>solvent] | C13 H10 N6 O4 Zn, 3[C3 H7 N<br>O] |
| Sum formula            | C13 H10 N6 O4 Zn [+<br>solvent] | C22 H31 N9 O7 Zn                  |
| Mr                     | 379.66                          | 598.90                            |
| Dx, g cm <sup>-3</sup> | 0.869                           | 1.371                             |
| Z                      | 8                               | 8                                 |
| Mu (mm <sup>-1</sup> ) | 0.863                           | 0.863                             |
| F000                   | 1536.0                          | 1536.0                            |
| F000'                  | 1538.81                         |                                   |
| h, k, lmax             | 27, 19, 20                      | 27, 19, 20                        |
| Nref                   | 4779                            | 4771                              |
| Tmin, Tmax             | 0.813, 0.917                    | 0.635, 0.745                      |
| Tmin'                  | 0.772                           |                                   |

Correction method= # Reported T Limits: Tmin=0.635 Tmax=0.745

AbsCorr = MULTI-SCAN

Data completeness= 0.998

Theta(max)= 24.403

R(reflections)= 0.0668( 3441)

wR2(reflections)=  
0.2197( 4771)

S = 1.032

Npar= 239

The following ALERTS were generated. Each ALERT has the format

**test-name\_ALERT\_alert-type\_alert-level.**

Click on the hyperlinks for more details of the test.

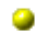

### Alert level C

ABSMU01\_ALERT\_1\_C The ratio of given/expected absorption coefficient lies  
outside the range 0.99 <> 1.01  
Calculated value of mu = 0.901  
Value of mu given = 0.863

THETM01\_ALERT\_3\_C The value of sine(theta\_max)/wavelength is less than 0.590  
Calculated sin(theta\_max)/wavelength = 0.5813

PLAT213\_ALERT\_2\_C Atom O5 has ADP max/min Ratio ..... 3.3 oblate

PLAT234\_ALERT\_4\_C Large Hirshfeld Difference Zn1 --O3\_d . 0.18 Ang.

PLAT234\_ALERT\_4\_C Large Hirshfeld Difference Zn1 --O4\_d . 0.16 Ang.

PLAT241\_ALERT\_2\_C High 'MainMol' Ueq as Compared to Neighbors of N6 Check

PLAT241\_ALERT\_2\_C High 'MainMol' Ueq as Compared to Neighbors of C12 Check

PLAT242\_ALERT\_2\_C Low 'MainMol' Ueq as Compared to Neighbors of C4 Check

PLAT250\_ALERT\_2\_C Large U3/U1 Ratio for Average U(i,j) Tensor .... 2.5 Note

PLAT334\_ALERT\_2\_C Small <C-C> Benzene Dist. C4 -C10 . 1.37 Ang.

PLAT341\_ALERT\_3\_C Low Bond Precision on C-C Bonds ..... 0.01014 Ang.

PLAT905\_ALERT\_3\_C Negative K value in the Analysis of Variance ... -10.486 Report

PLAT911\_ALERT\_3\_C Missing FCF Refl Between Thmin & STh/L= 0.581 9 Report

PLAT918\_ALERT\_3\_C Reflection(s) with I(obs) much Smaller I(calc) . 1 Check

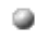

### Alert level G

FORMU01\_ALERT\_2\_G There is a discrepancy between the atom counts in the  
\_chemical\_formula\_sum and the formula from the \_atom\_site\* data.  
Atom count from \_chemical\_formula\_sum: C22 H31 N9 O7 Zn1  
Atom count from the \_atom\_site data: C13 H10 N6 O4 Zn1

CELLZ01\_ALERT\_1\_G Difference between formula and atom\_site contents detected.

CELLZ01\_ALERT\_1\_G ALERT: Large difference may be due to a  
symmetry error - see SYMMG tests  
From the CIF: \_cell\_formula\_units\_Z 8  
From the CIF: \_chemical\_formula\_sum C22 H31 N9 O7 Zn  
TEST: Compare cell contents of formula and atom\_site data

| atom | Z*formula | cif sites | diff   |
|------|-----------|-----------|--------|
| C    | 176.00    | 104.00    | 72.00  |
| H    | 248.00    | 80.00     | 168.00 |
| N    | 72.00     | 48.00     | 24.00  |
| O    | 56.00     | 32.00     | 24.00  |
| Zn   | 8.00      | 8.00      | 0.00   |

PLAT002\_ALERT\_2\_G Number of Distance or Angle Restraints on AtSite 6 Note

PLAT003\_ALERT\_2\_G Number of Uiso or Uij Restrained non-H Atoms ... 4 Report

PLAT004\_ALERT\_5\_G Polymeric Structure Found with Maximum Dimension 3 Info

PLAT041\_ALERT\_1\_G Calc. and Reported SumFormula Strings Differ Please Check

PLAT072\_ALERT\_2\_G SHELXL First Parameter in WGHT Unusually Large 0.14 Report

PLAT083\_ALERT\_2\_G SHELXL Second Parameter in WGHT Unusually Large 10.06 Why ?

PLAT128\_ALERT\_4\_G Alternate Setting for Input Space Group C2/c I2/a Note

|                   |                                                  |       |        |
|-------------------|--------------------------------------------------|-------|--------|
| PLAT152_ALERT_1_G | The Supplied and Calc. Volume s.u. Differ by ... | 3     | Units  |
| PLAT171_ALERT_4_G | The CIF-Embedded .res File Contains EADP Records | 1     | Report |
| PLAT176_ALERT_4_G | The CIF-Embedded .res File Contains SADI Records | 1     | Report |
| PLAT187_ALERT_4_G | The CIF-Embedded .res File Contains RIGU Records | 1     | Report |
| PLAT301_ALERT_3_G | Main Residue Disorder .....(Resd 1 )             | 13%   | Note   |
| PLAT432_ALERT_2_G | Short Inter X...Y Contact O3 ..C3 .              | 2.70  | Ang.   |
|                   | 1-x,y,3/2-z =                                    | 2_656 | Check  |
| PLAT606_ALERT_4_G | Solvent Accessible VOID(S) in Structure .....    | !     | Info   |
| PLAT860_ALERT_3_G | Number of Least-Squares Restraints .....         | 24    | Note   |
| PLAT909_ALERT_3_G | Percentage of I>2sig(I) Data at Theta(Max) Still | 46%   | Note   |
| PLAT933_ALERT_2_G | Number of HKL-OMIT Records in Embedded .res File | 5     | Note   |
| PLAT978_ALERT_2_G | Number C-C Bonds with Positive Residual Density. | 0     | Info   |

---

0 **ALERT level A** = Most likely a serious problem - resolve or explain  
 0 **ALERT level B** = A potentially serious problem, consider carefully  
 14 **ALERT level C** = Check. Ensure it is not caused by an omission or oversight  
 21 **ALERT level G** = General information/check it is not something unexpected

5 ALERT type 1 CIF construction/syntax error, inconsistent or missing data  
 14 ALERT type 2 Indicator that the structure model may be wrong or deficient  
 8 ALERT type 3 Indicator that the structure quality may be low  
 7 ALERT type 4 Improvement, methodology, query or suggestion  
 1 ALERT type 5 Informative message, check

---

It is advisable to attempt to resolve as many as possible of the alerts in all categories. Often the minor alerts point to easily fixed oversights, errors and omissions in your CIF or refinement strategy, so attention to these fine details can be worthwhile. In order to resolve some of the more serious problems it may be necessary to carry out additional measurements or structure refinements. However, the purpose of your study may justify the reported deviations and the more serious of these should normally be commented upon in the discussion or experimental section of a paper or in the "special\_details" fields of the CIF. checkCIF was carefully designed to identify outliers and unusual parameters, but every test has its limitations and alerts that are not important in a particular case may appear. Conversely, the absence of alerts does not guarantee there are no aspects of the results needing attention. It is up to the individual to critically assess their own results and, if necessary, seek expert advice.

### Publication of your CIF in IUCr journals

A basic structural check has been run on your CIF. These basic checks will be run on all CIFs submitted for publication in IUCr journals (*Acta Crystallographica*, *Journal of Applied Crystallography*, *Journal of Synchrotron Radiation*); however, if you intend to submit to *Acta Crystallographica Section C* or *E* or *IUCrData*, you should make sure that full publication checks are run on the final version of your CIF prior to submission.

### Publication of your CIF in other journals

Please refer to the *Notes for Authors* of the relevant journal for any special instructions relating to CIF submission.

PLATON version of 12/09/2022; check.def file version of 09/08/2022

Datablock tgs232\_1 - ellipsoid plot

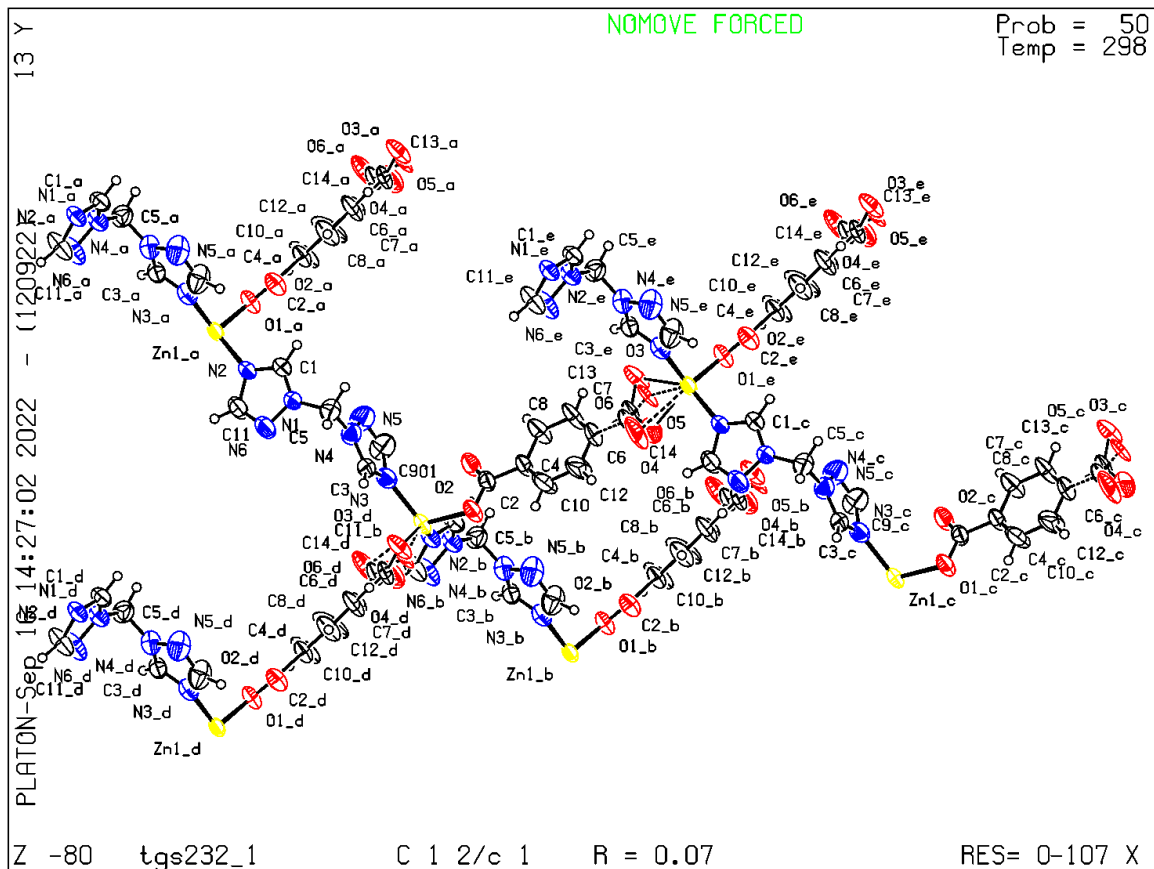

Supplement: Supplementary file 1 [file molecules-27-06481-s001.zip › 3.pdf]
