# Supplementary material for: Structural Diversity and Carbon Dioxide Sorption Selectivity of Zinc(II) Metal-Organic Frameworks Based on Bis(1,2,4-triazol-1-yl)methane and Terephthalic Acid
Source: Molecules. 2022 Oct 1;27(19):6481. doi: 10.3390/molecules27196481 (PMC9571910; doi:10.3390/molecules27196481)

## checkCIF/PLATON report

Structure factors have been supplied for datablock(s) tgs142\_a\_1

THIS REPORT IS FOR GUIDANCE ONLY. IF USED AS PART OF A REVIEW PROCEDURE FOR PUBLICATION, IT SHOULD NOT REPLACE THE EXPERTISE OF AN EXPERIENCED CRYSTALLOGRAPHIC REFEREE.

No syntax errors found.      CIF dictionary      Interpreting this report

### Datablock: tgs142\_a\_1

---

Bond precision:      C-C = 0.0064 Å      Wavelength=0.71073

Cell:                      a=19.9831 (15)              b=16.6095 (13)              c=17.4898 (13)  
                            alpha=90              beta=102.142 (2)              gamma=90  
Temperature:              150 K

|                        | Calculated                       | Reported                                |
|------------------------|----------------------------------|-----------------------------------------|
| Volume                 | 5675.2 (7)                       | 5675.2 (7)                              |
| Space group            | P 21/c                           | P 1 21/c 1                              |
| Hall group             | -P 2ybc                          | -P 2ybc                                 |
| Moiety formula         | C26 H20 N12 O8 Zn2, 6(C3 H7 N O) | 0.25(C52 H40 N24 O16 Zn4), 3(C3 H7 N O) |
| Sum formula            | C44 H62 N18 O14 Zn2              | C22 H31 N9 O7 Zn                        |
| Mr                     | 1197.90                          | 598.93                                  |
| Dx, g cm <sup>-3</sup> | 1.402                            | 1.402                                   |
| Z                      | 4                                | 8                                       |
| Mu (mm <sup>-1</sup> ) | 0.921                            | 0.921                                   |
| F000                   | 2496.0                           | 2496.0                                  |
| F000'                  | 2499.22                          |                                         |
| h, k, lmax             | 23, 19, 20                       | 23, 19, 20                              |
| Nref                   | 9347                             | 9328                                    |
| Tmin, Tmax             | 0.847, 0.929                     | 0.651, 0.745                            |
| Tmin'                  | 0.787                            |                                         |

Correction method= # Reported T Limits: Tmin=0.651 Tmax=0.745  
AbsCorr = MULTI-SCAN

Data completeness= 0.998      Theta(max)= 24.406

|                                |                                  |
|--------------------------------|----------------------------------|
| R(reflections)= 0.0506 ( 5414) | wR2(reflections)= 0.1681 ( 9328) |
| S = 1.060                      | Npar= 715                        |

---

The following ALERTS were generated. Each ALERT has the format

**test-name\_ALERT\_alert-type\_alert-level.**

Click on the hyperlinks for more details of the test.

---

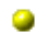

#### Alert level C

THETM01\_ALERT\_3\_C The value of  $\sin(\theta_{\max})/\lambda$  is less than 0.590  
Calculated  $\sin(\theta_{\max})/\lambda = 0.5814$

|                   |                                                  |               |
|-------------------|--------------------------------------------------|---------------|
| PLAT042_ALERT_1_C | Calc. and Reported MoietyFormula Strings Differ  | Please Check  |
| PLAT244_ALERT_4_C | Low 'Solvent' Ueq as Compared to Neighbors of    | N18 Check     |
| PLAT244_ALERT_4_C | Low 'Solvent' Ueq as Compared to Neighbors of    | N15 Check     |
| PLAT244_ALERT_4_C | Low 'Solvent' Ueq as Compared to Neighbors of    | N16 Check     |
| PLAT244_ALERT_4_C | Low 'Solvent' Ueq as Compared to Neighbors of    | N14 Check     |
| PLAT244_ALERT_4_C | Low 'Solvent' Ueq as Compared to Neighbors of    | N13 Check     |
| PLAT244_ALERT_4_C | Low 'Solvent' Ueq as Compared to Neighbors of    | N17 Check     |
| PLAT250_ALERT_2_C | Large U3/U1 Ratio for Average U(i,j) Tensor .... | 2.3 Note      |
| PLAT341_ALERT_3_C | Low Bond Precision on C-C Bonds .....            | 0.00644 Ang.  |
| PLAT905_ALERT_3_C | Negative K value in the Analysis of Variance ... | -8.404 Report |
| PLAT905_ALERT_3_C | Negative K value in the Analysis of Variance ... | -0.614 Report |
| PLAT911_ALERT_3_C | Missing FCF Refl Between Thmin & STh/L= 0.581    | 20 Report     |
| PLAT918_ALERT_3_C | Reflection(s) with I(obs) much Smaller I(calc) . | 1 Check       |

---

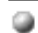

#### Alert level G

|                   |                                                  |             |
|-------------------|--------------------------------------------------|-------------|
| PLAT004_ALERT_5_G | Polymeric Structure Found with Maximum Dimension | 3 Info      |
| PLAT045_ALERT_1_G | Calculated and Reported Z Differ by a Factor ... | 0.500 Check |
| PLAT083_ALERT_2_G | SHELXL Second Parameter in WGHT Unusually Large  | 11.53 Why ? |
| PLAT794_ALERT_5_G | Tentative Bond Valency for Zn1 (II) .            | 1.89 Info   |
| PLAT794_ALERT_5_G | Tentative Bond Valency for Zn2 (II) .            | 1.86 Info   |
| PLAT909_ALERT_3_G | Percentage of I>2sig(I) Data at Theta(Max) Still | 33% Note    |
| PLAT933_ALERT_2_G | Number of HKL-OMIT Records in Embedded .res File | 3 Note      |
| PLAT978_ALERT_2_G | Number C-C Bonds with Positive Residual Density. | 0 Info      |

---

- 0 **ALERT level A** = Most likely a serious problem - resolve or explain  
0 **ALERT level B** = A potentially serious problem, consider carefully  
14 **ALERT level C** = Check. Ensure it is not caused by an omission or oversight  
8 **ALERT level G** = General information/check it is not something unexpected

- 2 ALERT type 1 CIF construction/syntax error, inconsistent or missing data  
4 ALERT type 2 Indicator that the structure model may be wrong or deficient  
7 ALERT type 3 Indicator that the structure quality may be low  
6 ALERT type 4 Improvement, methodology, query or suggestion  
3 ALERT type 5 Informative message, check
-

It is advisable to attempt to resolve as many as possible of the alerts in all categories. Often the minor alerts point to easily fixed oversights, errors and omissions in your CIF or refinement strategy, so attention to these fine details can be worthwhile. In order to resolve some of the more serious problems it may be necessary to carry out additional measurements or structure refinements. However, the purpose of your study may justify the reported deviations and the more serious of these should normally be commented upon in the discussion or experimental section of a paper or in the "special\_details" fields of the CIF. checkCIF was carefully designed to identify outliers and unusual parameters, but every test has its limitations and alerts that are not important in a particular case may appear. Conversely, the absence of alerts does not guarantee there are no aspects of the results needing attention. It is up to the individual to critically assess their own results and, if necessary, seek expert advice.

### **Publication of your CIF in IUCr journals**

A basic structural check has been run on your CIF. These basic checks will be run on all CIFs submitted for publication in IUCr journals (*Acta Crystallographica*, *Journal of Applied Crystallography*, *Journal of Synchrotron Radiation*); however, if you intend to submit to *Acta Crystallographica Section C* or *E* or *IUCrData*, you should make sure that full publication checks are run on the final version of your CIF prior to submission.

### **Publication of your CIF in other journals**

Please refer to the *Notes for Authors* of the relevant journal for any special instructions relating to CIF submission.

Datablock tgs142\_a\_1 - ellipsoid plot

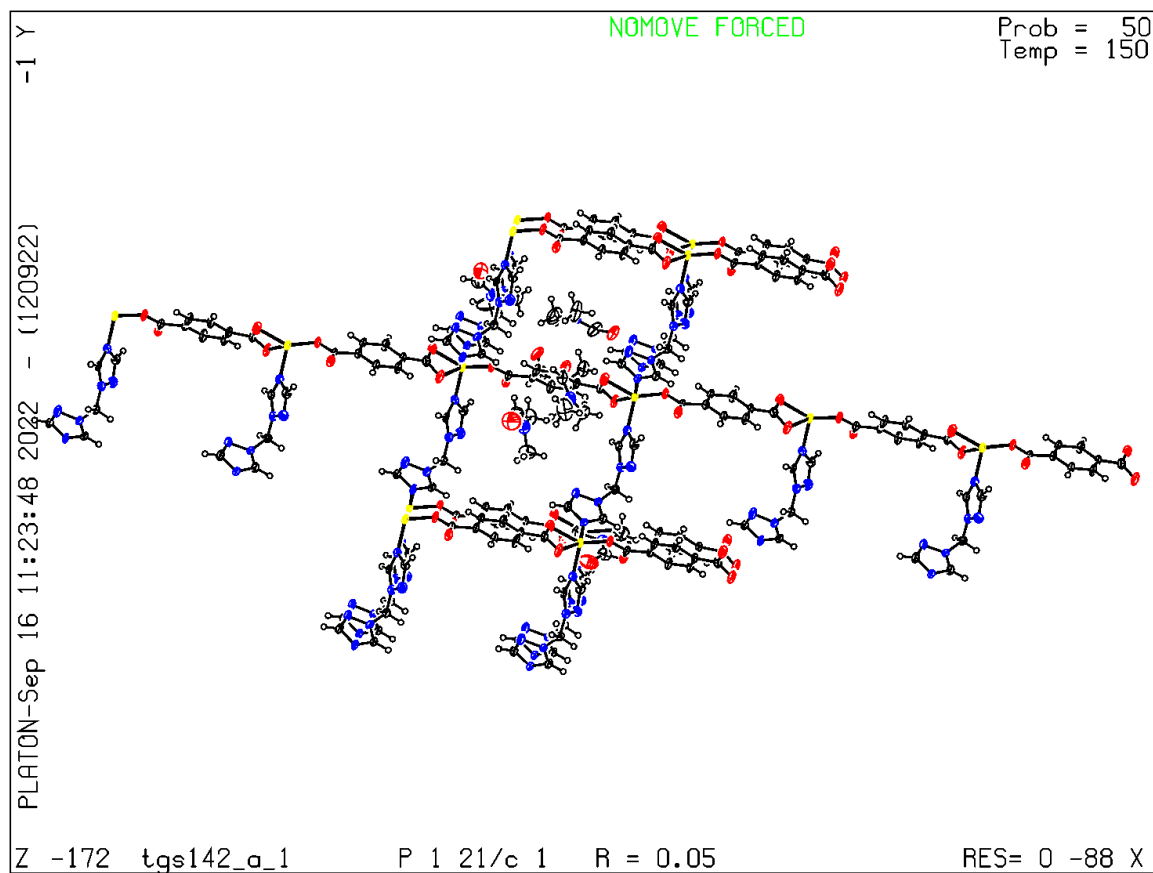

Supplement: Supplementary file 1 [file molecules-27-06481-s001.zip › 3a.pdf]
