# Supplementary material for: Structural Diversity and Carbon Dioxide Sorption Selectivity of Zinc(II) Metal-Organic Frameworks Based on Bis(1,2,4-triazol-1-yl)methane and Terephthalic Acid
Source: Molecules. 2022 Oct 1;27(19):6481. doi: 10.3390/molecules27196481 (PMC9571910; doi:10.3390/molecules27196481)
Supplement: Supplementary file 1 [file molecules-27-06481-s001.zip]

Archive with 18 entries (18 files):
- 1.cif
- __MACOSX/._1.cif
- 1.pdf
- __MACOSX/._1.pdf
- 2.cif
- __MACOSX/._2.cif
- 2.pdf
- __MACOSX/._2.pdf
- 3.cif
- __MACOSX/._3.cif
- 3.pdf
- __MACOSX/._3.pdf
- 3a.cif
- __MACOSX/._3a.cif
- 3a.pdf
- __MACOSX/._3a.pdf
- Supplementary Materials.pdf
- __MACOSX/._Supplementary Materials.pdf
