# Supplementary material for: Structural Diversity and Carbon Dioxide Sorption Selectivity of Zinc(II) Metal-Organic Frameworks Based on Bis(1,2,4-triazol-1-yl)methane and Terephthalic Acid
Source: Molecules. 2022 Oct 1;27(19):6481. doi: 10.3390/molecules27196481 (PMC9571910; doi:10.3390/molecules27196481)
Supplement: Supplementary file 1 [file molecules-27-06481-s001.zip › 1.cif]

data_tgs125
_audit_creation_date               2022-09-16
_audit_creation_method
;
Olex2 1.2
(compiled 2018.05.29 svn.r3508 for OlexSys, GUI svn.r5506)
;
_shelx_SHELXL_version_number       '2017/1'
_audit_contact_author_address      ?
_audit_contact_author_email        ?
_audit_contact_author_name         ''
_audit_contact_author_phone        ?
_publ_contact_author_id_orcid      ?
_publ_section_references
;
Dolomanov, O.V., Bourhis, L.J., Gildea, R.J, Howard, J.A.K. & Puschmann, H.
 (2009), J. Appl. Cryst. 42, 339-341.

Sheldrick, G.M. (2015). Acta Cryst. A71, 3-8.

Sheldrick, G.M. (2015). Acta Cryst. C71, 3-8.
;
_chemical_name_common              ?
_chemical_name_systematic          ?
_chemical_formula_moiety           'C32 H25 N7 O13 Zn3, 3.5(C3 H7 N O), [C3 H7 N O]'
_chemical_formula_sum              'C45.50 H56.50 N11.50 O17.50 Zn3'
_chemical_formula_weight           1240.67
_chemical_melting_point            ?
loop_
  _atom_type_symbol
  _atom_type_description
  _atom_type_scat_dispersion_real
  _atom_type_scat_dispersion_imag
  _atom_type_scat_source
 'C' 'C' 0.0033 0.0016 'International Tables Vol C Tables 4.2.6.8 and 6.1.1.4'
 'H' 'H' 0.0000 0.0000 'International Tables Vol C Tables 4.2.6.8 and 6.1.1.4'
 'N' 'N' 0.0061 0.0033 'International Tables Vol C Tables 4.2.6.8 and 6.1.1.4'
 'O' 'O' 0.0106 0.0060 'International Tables Vol C Tables 4.2.6.8 and 6.1.1.4'
 'Zn' 'Zn' 0.2839 1.4301 'International Tables Vol C Tables 4.2.6.8 and 6.1.1.4'

_shelx_space_group_comment
;
The symmetry employed for this shelxl refinement is uniquely defined
by the following loop, which should always be used as a source of
symmetry information in preference to the above space-group names.
They are only intended as comments.
;
_space_group_crystal_system        'triclinic'
_space_group_IT_number             2
_space_group_name_H-M_alt          'P -1'
_space_group_name_Hall             '-P 1'
loop_
  _space_group_symop_operation_xyz
 'x, y, z'
 '-x, -y, -z'

_cell_length_a                     9.7232(13)
_cell_length_b                     18.204(3)
_cell_length_c                     18.626(3)
_cell_angle_alpha                  117.577(4)
_cell_angle_beta                   102.500(5)
_cell_angle_gamma                  92.264(5)
_cell_volume                       2815.6(7)
_cell_formula_units_Z              2
_cell_measurement_reflns_used      9801
_cell_measurement_temperature      150(2)
_cell_measurement_theta_max        25.81
_cell_measurement_theta_min        2.24
_shelx_estimated_absorpt_T_max     0.878
_shelx_estimated_absorpt_T_min     0.652
_exptl_absorpt_coefficient_mu      1.338
_exptl_absorpt_correction_T_max    0.7453
_exptl_absorpt_correction_T_min    0.6029
_exptl_absorpt_correction_type     multi-scan
_exptl_absorpt_process_details    
 'SADABS-2012/1 (Bruker,2012) was used for absorption correction. wR2(int) was 0.0724 before and 0.0374 after correction. The Ratio of minimum to maximum transmission is 0.8089. The \l/2 correction factor is 0.0015.'
_exptl_absorpt_special_details     ?
_exptl_crystal_colour              colourless
_exptl_crystal_colour_primary      colourless
_exptl_crystal_density_diffrn      1.463
_exptl_crystal_density_meas        .
_exptl_crystal_density_method      ?
_exptl_crystal_description         prism
_exptl_crystal_F_000               1200
_exptl_crystal_size_max            0.35
_exptl_crystal_size_mid            0.25
_exptl_crystal_size_min            0.1
_exptl_transmission_factor_max     ?
_exptl_transmission_factor_min     ?
_diffrn_reflns_av_R_equivalents    0.0238
_diffrn_reflns_av_unetI/netI       0.0235
_diffrn_reflns_Laue_measured_fraction_full  0.999
_diffrn_reflns_Laue_measured_fraction_max  0.991
_diffrn_reflns_limit_h_max         11
_diffrn_reflns_limit_h_min         -11
_diffrn_reflns_limit_k_max         22
_diffrn_reflns_limit_k_min         -22
_diffrn_reflns_limit_l_max         22
_diffrn_reflns_limit_l_min         -22
_diffrn_reflns_number              38194
_diffrn_reflns_point_group_measured_fraction_full  0.999
_diffrn_reflns_point_group_measured_fraction_max  0.991
_diffrn_reflns_theta_full          25.242
_diffrn_reflns_theta_max           25.819
_diffrn_reflns_theta_min           2.174
_diffrn_ambient_temperature        150(2)
_diffrn_detector                   CCD
_diffrn_detector_area_resol_mean   8.33
_diffrn_detector_type              'Bruker APEXII CCD area detector'
_diffrn_measured_fraction_theta_full  0.999
_diffrn_measured_fraction_theta_max  0.991
_diffrn_measurement_device         '\k-geometry diffractometer'
_diffrn_measurement_device_type    'Bruker APEX diffractometer'
_diffrn_measurement_method         '\w and \f scans'
_diffrn_radiation_monochromator    graphite
_diffrn_radiation_type             MoK\a
_diffrn_radiation_wavelength       0.71073
_diffrn_source                     'sealed tube'
_diffrn_special_details            ?
_diffrn_standards_interval_count   .
_diffrn_standards_interval_time    .
_diffrn_standards_number           .
_reflns_Friedel_coverage           0.000
_reflns_Friedel_fraction_full      .
_reflns_Friedel_fraction_max       .
_reflns_number_gt                  9205
_reflns_number_total               10769
_reflns_special_details
;
 Reflections were merged by SHELXL according to the crystal
 class for the calculation of statistics and refinement.
 
 Structure factors included contributions from the .fab file.
 
 _reflns_Friedel_fraction is defined as the number of unique
 Friedel pairs measured divided by the number that would be
 possible theoretically, ignoring centric projections and
 systematic absences.
;
_reflns_threshold_expression       'I > 2\s(I)'
_computing_cell_refinement         'Bruker SAINT'
_computing_data_collection         'Bruker APEX2'
_computing_data_reduction          'Bruker SAINT'
_computing_molecular_graphics      'Olex2 (Dolomanov et al., 2009)'
_computing_publication_material    'Olex2 (Dolomanov et al., 2009)'
_computing_structure_refinement    'ShelXL (Sheldrick, 2015)'
_computing_structure_solution      'ShelXT (Sheldrick, 2015)'
_refine_diff_density_max           1.976
_refine_diff_density_min           -1.151
_refine_diff_density_rms           0.124
_refine_ls_extinction_coef         .
_refine_ls_extinction_method       none
_refine_ls_goodness_of_fit_ref     1.060
_refine_ls_hydrogen_treatment      constr
_refine_ls_matrix_type             full
_refine_ls_number_parameters       601
_refine_ls_number_reflns           10769
_refine_ls_number_restraints       51
_refine_ls_R_factor_all            0.0661
_refine_ls_R_factor_gt             0.0577
_refine_ls_restrained_S_all        1.061
_refine_ls_shift/su_max            0.005
_refine_ls_shift/su_mean           0.000
_refine_ls_structure_factor_coef   Fsqd
_refine_ls_weighting_details      
 'w=1/[\s^2^(Fo^2^)+(0.1064P)^2^+8.1085P] where P=(Fo^2^+2Fc^2^)/3'
_refine_ls_weighting_scheme        calc
_refine_ls_wR_factor_gt            0.1695
_refine_ls_wR_factor_ref           0.1782
_refine_special_details            ?
_olex2_refinement_description
;
1. Fixed Uiso
 At 1.2 times of:
  All C(H) groups, All C(H,H) groups
 At 1.5 times of:
  All C(H,H,H) groups
2. Restrained distances
 O13-C31
 1.25 with sigma of 0.02
 N8-C34 = N7-C31
 1.35 with sigma of 0.02
 C47-N12 = N12-C45
 1.5 with sigma of 0.02
 N8-C33 = N7-C30 = N8-C35 = N7-C32
 1.45 with sigma of 0.02
3. Uiso/Uaniso restraints and constraints
Uanis(C34) = Uanis(C31)
Uanis(N8) = Uanis(N7)
Uanis(C33) = Uanis(C30) = Uanis(C35) = Uanis(C32)
4. Rigid body (RIGU) restrains
 O13, N7, C30, C31, C32
 with sigma for 1-2 distances of 0.004 and sigma for 1-3 distances of 0.004
 N8, C33, C34, C35
 with sigma for 1-2 distances of 0.004 and sigma for 1-3 distances of 0.004
5. Others
 Sof(N8)=Sof(C33)=Sof(H33A)=Sof(H33B)=Sof(H33C)=Sof(C34)=Sof(H34)=Sof(C35)=
 Sof(H35A)=Sof(H35B)=Sof(H35C)=1-FVAR(1)
 Sof(N7)=Sof(C30)=Sof(H30A)=Sof(H30B)=Sof(H30C)=Sof(C31)=Sof(H31)=Sof(C32)=
 Sof(H32A)=Sof(H32B)=Sof(H32C)=FVAR(1)
 Fixed Sof: O16(0.5) O20(0.5) H40A(0.5) H40(0.5) O18(0.5) N12(0.5) C45(0.5)
 H45A(0.5) H45B(0.5) H45C(0.5) C46(0.5) H46(0.5) C47(0.5) H47A(0.5) H47B(0.5)
 H47C(0.5)
6.a Secondary CH2 refined with riding coordinates:
 C18(H18A,H18B)
6.b Aromatic/amide H refined with riding coordinates:
 C7(H7), C10(H10), C11(H11), C13(H13), C16(H16), C17(H17), C19(H19), C20(H20),
 C22(H22), C23(H23), C24(H24), C25(H25), C26(H26), C27(H27), C28(H28), C29(H29),
  C31(H31), C34(H34), C37(H37), C40(H40A), C40(H40), C42(H42), C46(H46)
6.c Idealised Me refined with riding coordinates:
 C35(H35A,H35B,H35C)
6.d Idealised Me refined as rotating group:
 C30(H30A,H30B,H30C), C32(H32A,H32B,H32C), C33(H33A,H33B,H33C), C36(H36A,H36B,
 H36C), C38(H38A,H38B,H38C), C39(H39A,H39B,H39C), C41(H41A,H41B,H41C), C43(H43A,
 H43B,H43C), C44(H44A,H44B,H44C), C45(H45A,H45B,H45C), C47(H47A,H47B,H47C)
;
_atom_sites_solution_hydrogens     geom
_atom_sites_solution_primary       dual
_atom_sites_solution_secondary     ?
loop_
  _atom_site_label
  _atom_site_type_symbol
  _atom_site_fract_x
  _atom_site_fract_y
  _atom_site_fract_z
  _atom_site_U_iso_or_equiv
  _atom_site_adp_type
  _atom_site_occupancy
  _atom_site_site_symmetry_order
  _atom_site_calc_flag
  _atom_site_refinement_flags_posn
  _atom_site_refinement_flags_adp
  _atom_site_refinement_flags_occupancy
  _atom_site_disorder_assembly
  _atom_site_disorder_group
 Zn1 Zn 0.500000 0.500000 0.000000 0.01614(15) Uani 1 2 d S T P . .
 Zn2 Zn 1.000000 1.000000 0.000000 0.01805(16) Uani 1 2 d S T P . .
 Zn3 Zn 0.54179(5) 0.59431(3) 0.20015(3) 0.02031(14) Uani 1 1 d . . . . .
 Zn4 Zn 1.15362(5) 1.11043(3) 0.20648(3) 0.02183(14) Uani 1 1 d . . . . .
 O1 O 0.8985(3) 0.98328(19) 0.0788(2) 0.0294(7) Uani 1 1 d . . . . .
 O2 O 0.6561(3) 0.68475(18) 0.20148(19) 0.0294(7) Uani 1 1 d . . . . .
 O3 O 0.6560(4) 0.50572(19) 0.19589(19) 0.0343(7) Uani 1 1 d . . . . .
 O4 O 1.0214(4) 0.1826(2) 0.1825(2) 0.0382(8) Uani 1 1 d . . . . .
 O5 O 1.0253(4) 1.02561(19) 0.2101(2) 0.0366(8) Uani 1 1 d . . . . .
 O6 O 0.3096(4) 0.6449(2) 0.1664(2) 0.0465(9) Uani 1 1 d . . . . .
 O7 O 1.3547(4) 1.1565(2) 0.1637(3) 0.0553(11) Uani 1 1 d . . . . .
 O8 O 0.3839(3) 0.52437(18) 0.09541(17) 0.0242(6) Uani 1 1 d . . . . .
 O9 O 0.9692(3) 0.12244(18) 0.0424(2) 0.0310(7) Uani 1 1 d . . . . .
 O10 O 0.6607(3) 0.4677(2) 0.06372(19) 0.0294(7) Uani 1 1 d . . . . .
 O11 O 0.5876(3) 0.62498(18) 0.06100(19) 0.0301(7) Uani 1 1 d . . . . .
 O12 O 1.2003(3) 1.0387(2) 0.09681(19) 0.0298(7) Uani 1 1 d . . . . .
 O13 O 1.3304(6) 1.0483(3) 0.2544(3) 0.0766(14) Uani 1 1 d D U . . .
 N1 N 0.4993(5) 0.6295(3) 0.4280(2) 0.0404(10) Uani 1 1 d . . . . .
 N2 N 0.5020(5) 0.6259(3) 0.3105(2) 0.0392(9) Uani 1 1 d . . . . .
 N3 N 0.7736(5) 0.7923(3) 0.6750(3) 0.0463(11) Uani 1 1 d . . . . .
 N4 N 0.6442(6) 0.6835(3) 0.5643(3) 0.0531(12) Uani 1 1 d . . . . .
 N5 N 0.4156(7) 0.6875(4) 0.4232(3) 0.0726(17) Uani 1 1 d . . . . .
 N6 N 0.7800(7) 0.6790(5) 0.5536(4) 0.092(2) Uani 1 1 d . . . . .
 N7 N 1.379(3) 0.9149(14) 0.2179(14) 0.124(4) Uani 0.598(13) 1 d D U . A 1
 N8 N 1.393(4) 0.9227(19) 0.243(2) 0.124(4) Uani 0.402(13) 1 d D U . A 2
 C1 C 0.6501(4) 0.6837(2) 0.1321(3) 0.0246(8) Uani 1 1 d . . . . .
 C2 C 0.1379(4) 0.5347(3) 0.0509(3) 0.0279(9) Uani 1 1 d . . . . .
 C3 C 0.8576(5) 0.9007(3) 0.1416(3) 0.0295(9) Uani 1 1 d . . . . .
 C4 C 0.6873(4) 0.4587(3) 0.1277(3) 0.0252(9) Uani 1 1 d . . . . .
 C5 C 0.7227(5) 0.7603(3) 0.1366(3) 0.0269(9) Uani 1 1 d . . . . .
 C6 C 0.9687(5) 0.1793(3) 0.1132(3) 0.0284(9) Uani 1 1 d . . . . .
 C7 C -0.1047(5) 0.5511(3) 0.0042(3) 0.0320(10) Uani 1 1 d . . . . .
 H7 H -0.175994 0.585840 0.007323 0.038 Uiso 1 1 calc R . . . .
 C8 C 0.7630(5) 0.3874(3) 0.1246(3) 0.0276(9) Uani 1 1 d . . . . .
 C9 C 1.4099(4) 1.0401(3) 0.0495(3) 0.0290(9) Uani 1 1 d . . . . .
 C10 C 1.3851(5) 0.9532(3) 0.0017(3) 0.0329(10) Uani 1 1 d . . . . .
 H10 H 1.307383 0.921247 0.003395 0.039 Uiso 1 1 calc R . . . .
 C11 C 0.7824(5) 0.3271(3) 0.0489(3) 0.0329(10) Uani 1 1 d . . . . .
 H11 H 0.750793 0.332080 -0.000340 0.039 Uiso 1 1 calc R . . . .
 C12 C 0.8970(5) 0.2527(3) 0.1173(3) 0.0294(9) Uani 1 1 d . . . . .
 C13 C 1.4746(5) 0.9130(3) -0.0485(3) 0.0342(10) Uani 1 1 d . . . . .
 H13 H 1.456836 0.853642 -0.082155 0.041 Uiso 1 1 calc R . . . .
 C14 C 1.3178(5) 1.0835(3) 0.1064(3) 0.0334(10) Uani 1 1 d . . . . .
 C15 C 0.9314(5) 0.9751(3) 0.1429(3) 0.0261(9) Uani 1 1 d . . . . .
 C16 C 0.0335(5) 0.5854(3) 0.0548(3) 0.0328(10) Uani 1 1 d . . . . .
 H16 H 0.056984 0.644072 0.092358 0.039 Uiso 1 1 calc R . . . .
 C17 C 0.5456(6) 0.5947(3) 0.3597(3) 0.0378(11) Uani 1 1 d . . . . .
 H17 H 0.603811 0.551970 0.348187 0.045 Uiso 1 1 calc R . . . .
 C18 C 0.5254(8) 0.6195(4) 0.5007(3) 0.0606(19) Uani 1 1 d . . . . .
 H18A H 0.549068 0.562929 0.486911 0.073 Uiso 1 1 calc R . . . .
 H18B H 0.439279 0.625723 0.521892 0.073 Uiso 1 1 calc R . . . .
 C19 C 0.4196(8) 0.6831(5) 0.3514(4) 0.0656(19) Uani 1 1 d . . . . .
 H19 H 0.370856 0.715869 0.329905 0.079 Uiso 1 1 calc R . . . .
 C20 C 0.8556(8) 0.7465(5) 0.6231(4) 0.078(2) Uani 1 1 d . . . . .
 H20 H 0.955919 0.761690 0.635775 0.094 Uiso 1 1 calc R . . . .
 C21 C 0.2841(5) 0.5723(3) 0.1077(3) 0.0295(9) Uani 1 1 d . . . . .
 C22 C 0.7647(6) 0.8396(3) 0.0684(3) 0.0385(11) Uani 1 1 d . . . . .
 H22 H 0.746663 0.845751 0.019367 0.046 Uiso 1 1 calc R . . . .
 C23 C 0.8479(5) 0.2595(3) 0.0451(3) 0.0338(10) Uani 1 1 d . . . . .
 H23 H 0.859309 0.217742 -0.007017 0.041 Uiso 1 1 calc R . . . .
 C24 C 0.6976(6) 0.7696(3) 0.0653(3) 0.0397(12) Uani 1 1 d . . . . .
 H24 H 0.634082 0.727750 0.014322 0.048 Uiso 1 1 calc R . . . .
 C25 C 0.8172(6) 0.8213(3) 0.2108(3) 0.0414(12) Uani 1 1 d . . . . .
 H25 H 0.834866 0.815160 0.259747 0.050 Uiso 1 1 calc R . . . .
 C26 C 0.8784(6) 0.3135(3) 0.1930(3) 0.0399(12) Uani 1 1 d . . . . .
 H26 H 0.912297 0.309366 0.242539 0.048 Uiso 1 1 calc R . . . .
 C27 C 0.6453(5) 0.7481(3) 0.6376(3) 0.0341(10) Uani 1 1 d . . . . .
 H27 H 0.564755 0.760549 0.659775 0.041 Uiso 1 1 calc R . . . .
 C28 C 0.8107(6) 0.3801(3) 0.1966(3) 0.0404(12) Uani 1 1 d . . . . .
 H28 H 0.796802 0.420936 0.248448 0.049 Uiso 1 1 calc R . . . .
 C29 C 0.8854(6) 0.8909(3) 0.2132(3) 0.0416(12) Uani 1 1 d . . . . .
 H29 H 0.951259 0.931980 0.263622 0.050 Uiso 1 1 calc R . . . .
 C30 C 1.336(3) 0.8397(15) 0.219(2) 0.141(4) Uani 0.598(13) 1 d D U . A 1
 H30A H 1.372511 0.847281 0.275420 0.211 Uiso 0.598(13) 1 calc GR . . A 1
 H30B H 1.375631 0.793630 0.179417 0.211 Uiso 0.598(13) 1 calc GR . . A 1
 H30C H 1.232034 0.826261 0.201604 0.211 Uiso 0.598(13) 1 calc GR . . A 1
 C31 C 1.303(4) 0.9746(14) 0.237(3) 0.089(6) Uani 0.598(13) 1 d D U . A 1
 H31 H 1.209376 0.958669 0.237843 0.107 Uiso 0.598(13) 1 calc R . . A 1
 C32 C 1.496(2) 0.9224(13) 0.1873(15) 0.141(4) Uani 0.598(13) 1 d D U . A 1
 H32A H 1.557075 0.976776 0.226245 0.211 Uiso 0.598(13) 1 calc GR . . A 1
 H32B H 1.461675 0.918442 0.131996 0.211 Uiso 0.598(13) 1 calc GR . . A 1
 H32C H 1.551128 0.877120 0.182529 0.211 Uiso 0.598(13) 1 calc GR . . A 1
 C33 C 1.366(5) 0.834(2) 0.192(3) 0.141(4) Uani 0.402(13) 1 d D U . A 2
 H33A H 1.264799 0.812793 0.181252 0.211 Uiso 0.402(13) 1 calc GR . . A 2
 H33B H 1.425502 0.808294 0.220951 0.211 Uiso 0.402(13) 1 calc GR . . A 2
 H33C H 1.387953 0.818855 0.138567 0.211 Uiso 0.402(13) 1 calc GR . . A 2
 C34 C 1.313(6) 0.972(3) 0.223(4) 0.089(6) Uani 0.402(13) 1 d D U . A 2
 H34 H 1.230931 0.942810 0.177152 0.107 Uiso 0.402(13) 1 calc R . . A 2
 C35 C 1.489(4) 0.9681(17) 0.3280(19) 0.141(4) Uani 0.402(13) 1 d D U . A 2
 H35A H 1.478529 0.937811 0.358841 0.211 Uiso 0.402(13) 1 calc R . . A 2
 H35B H 1.465692 1.024604 0.357583 0.211 Uiso 0.402(13) 1 calc R . . A 2
 H35C H 1.587866 0.972423 0.324266 0.211 Uiso 0.402(13) 1 calc R . . A 2
 O15 O 1.3063(11) 0.7015(6) 0.6118(6) 0.143(3) Uiso 1 1 d . . . . .
 N9 N 1.2372(11) 0.8281(7) 0.6608(7) 0.121(3) Uiso 1 1 d . . . . .
 C36 C 1.2781(14) 0.8491(8) 0.7427(8) 0.121(4) Uiso 1 1 d . . . . .
 H36A H 1.193813 0.854177 0.764514 0.181 Uiso 1 1 calc GR . . . .
 H36B H 1.342943 0.902944 0.774147 0.181 Uiso 1 1 calc GR . . . .
 H36C H 1.327072 0.805593 0.748911 0.181 Uiso 1 1 calc GR . . . .
 C37 C 1.244(2) 0.7527(12) 0.5973(12) 0.179(7) Uiso 1 1 d . . . . .
 H37 H 1.200694 0.739039 0.540875 0.215 Uiso 1 1 calc R . . . .
 C38 C 1.183(2) 0.8905(14) 0.6394(13) 0.229(9) Uiso 1 1 d . . . . .
 H38A H 1.126898 0.922852 0.677969 0.344 Uiso 1 1 calc GR . . . .
 H38B H 1.121875 0.862406 0.581665 0.344 Uiso 1 1 calc GR . . . .
 H38C H 1.262800 0.928416 0.644176 0.344 Uiso 1 1 calc GR . . . .
 O16 O 1.191(4) 0.817(2) 0.355(2) 0.253(14) Uiso 0.5 1 d . . . B 2
 O20 O 1.066(3) 0.832(2) 0.443(2) 0.237(13) Uiso 0.5 1 d . . . B 1
 N10 N 1.0151(11) 0.7002(7) 0.3425(6) 0.115(3) Uiso 1 1 d . . . . .
 C39 C 1.0152(16) 0.6377(9) 0.2629(9) 0.143(5) Uiso 1 1 d . . . . .
 H39A H 0.916724 0.615511 0.227876 0.215 Uiso 1 1 calc GR . . . .
 H39B H 1.060430 0.592309 0.267359 0.215 Uiso 1 1 calc GR . . . .
 H39C H 1.068561 0.661247 0.237194 0.215 Uiso 1 1 calc GR . . . .
 C40 C 1.0805(18) 0.7759(11) 0.3729(10) 0.145(5) Uiso 1 1 d . . . . .
 H40A H 1.048646 0.814797 0.418949 0.174 Uiso 0.5 1 calc R . . B 2
 H40 H 1.137995 0.789082 0.343958 0.174 Uiso 0.5 1 calc R . . B 1
 C41 C 0.924(2) 0.6819(14) 0.3872(13) 0.236(10) Uiso 1 1 d . . . . .
 H41A H 0.824498 0.665507 0.353311 0.353 Uiso 1 1 calc GR . . . .
 H41B H 0.931930 0.732068 0.441159 0.353 Uiso 1 1 calc GR . . . .
 H41C H 0.954245 0.635923 0.397079 0.353 Uiso 1 1 calc GR . . . .
 O17 O 1.3551(8) 0.4454(4) 0.3757(4) 0.1024(19) Uiso 1 1 d . . . . .
 N11 N 1.3241(8) 0.3936(4) 0.2356(4) 0.0758(17) Uiso 1 1 d . . . . .
 C42 C 1.2786(15) 0.4275(8) 0.3053(8) 0.126(4) Uiso 1 1 d . . . . .
 H42 H 1.183279 0.438481 0.300750 0.151 Uiso 1 1 calc R . . . .
 C43 C 1.461(2) 0.3695(12) 0.2543(11) 0.188(7) Uiso 1 1 d . . . . .
 H43A H 1.493667 0.389006 0.314733 0.282 Uiso 1 1 calc GR . . . .
 H43B H 1.529991 0.394907 0.237579 0.282 Uiso 1 1 calc GR . . . .
 H43C H 1.452432 0.308224 0.223345 0.282 Uiso 1 1 calc GR . . . .
 C44 C 1.2613(19) 0.3579(11) 0.1514(10) 0.180(7) Uiso 1 1 d . . . . .
 H44A H 1.208328 0.302161 0.131459 0.270 Uiso 1 1 calc GR . . . .
 H44B H 1.334922 0.352651 0.121517 0.270 Uiso 1 1 calc GR . . . .
 H44C H 1.195464 0.393373 0.140810 0.270 Uiso 1 1 calc GR . . . .
 O18 O 0.7710(12) 0.4850(7) 0.3945(7) 0.078(3) Uiso 0.5 1 d . . . C -1
 N12 N 0.9881(19) 0.5092(11) 0.4882(10) 0.088(4) Uiso 0.5 1 d D . . C -1
 C45 C 1.072(2) 0.5063(15) 0.4304(13) 0.107(6) Uiso 0.5 1 d D . . C -1
 H45A H 1.129080 0.460885 0.419908 0.160 Uiso 0.5 1 calc GR . . C -1
 H45B H 1.135842 0.559954 0.455504 0.160 Uiso 0.5 1 calc GR . . C -1
 H45C H 1.007661 0.496060 0.377210 0.160 Uiso 0.5 1 calc GR . . C -1
 C46 C 0.8440(18) 0.4963(11) 0.4611(10) 0.074(4) Uiso 0.5 1 d . . . C -1
 H46 H 0.793760 0.496197 0.499513 0.089 Uiso 0.5 1 calc R . . C -1
 C47 C 1.069(3) 0.5287(16) 0.5734(12) 0.126(8) Uiso 0.5 1 d D . . C -1
 H47A H 1.089652 0.476630 0.573751 0.190 Uiso 0.5 1 calc GR . . C -1
 H47B H 1.012216 0.556595 0.613140 0.190 Uiso 0.5 1 calc GR . . C -1
 H47C H 1.158756 0.566019 0.589977 0.190 Uiso 0.5 1 calc GR . . C -1

loop_
  _atom_site_aniso_label
  _atom_site_aniso_U_11
  _atom_site_aniso_U_22
  _atom_site_aniso_U_33
  _atom_site_aniso_U_23
  _atom_site_aniso_U_13
  _atom_site_aniso_U_12
 Zn1 0.0168(3) 0.0145(3) 0.0178(3) 0.0088(2) 0.0034(2) 0.0042(2)
 Zn2 0.0204(3) 0.0156(3) 0.0214(3) 0.0104(2) 0.0080(2) 0.0047(2)
 Zn3 0.0254(3) 0.0175(2) 0.0198(2) 0.00968(19) 0.00760(18) 0.00404(18)
 Zn4 0.0243(3) 0.0160(2) 0.0217(2) 0.00812(19) 0.00217(18) 0.00145(18)
 O1 0.0288(15) 0.0337(16) 0.0419(17) 0.0272(15) 0.0186(14) 0.0096(13)
 O2 0.0355(17) 0.0241(15) 0.0306(16) 0.0169(13) 0.0051(13) -0.0018(13)
 O3 0.0476(19) 0.0256(16) 0.0285(16) 0.0143(13) 0.0033(14) 0.0151(14)
 O4 0.049(2) 0.0344(18) 0.0424(19) 0.0251(16) 0.0154(16) 0.0233(16)
 O5 0.055(2) 0.0242(16) 0.0316(17) 0.0143(14) 0.0136(15) -0.0045(15)
 O6 0.0291(17) 0.040(2) 0.045(2) 0.0030(17) 0.0036(15) 0.0064(15)
 O7 0.038(2) 0.040(2) 0.060(2) -0.0007(19) 0.0202(18) 0.0034(16)
 O8 0.0191(14) 0.0297(15) 0.0260(14) 0.0147(12) 0.0069(11) 0.0045(11)
 O9 0.0385(17) 0.0212(15) 0.0439(18) 0.0198(14) 0.0195(15) 0.0137(13)
 O10 0.0255(15) 0.0369(17) 0.0383(17) 0.0276(15) 0.0084(13) 0.0134(13)
 O11 0.0407(18) 0.0182(14) 0.0294(16) 0.0107(13) 0.0083(13) -0.0012(13)
 O12 0.0275(15) 0.0346(17) 0.0369(16) 0.0221(14) 0.0146(13) 0.0100(13)
 O13 0.078(3) 0.056(3) 0.091(4) 0.036(3) 0.011(3) 0.022(2)
 N1 0.053(3) 0.038(2) 0.0231(19) 0.0100(17) 0.0107(18) -0.0071(19)
 N2 0.051(3) 0.037(2) 0.028(2) 0.0133(18) 0.0157(18) 0.0030(19)
 N3 0.050(3) 0.044(3) 0.034(2) 0.014(2) 0.004(2) -0.006(2)
 N4 0.062(3) 0.056(3) 0.031(2) 0.016(2) 0.009(2) -0.012(2)
 N5 0.094(5) 0.090(4) 0.047(3) 0.034(3) 0.039(3) 0.041(4)
 N6 0.066(4) 0.099(5) 0.063(4) -0.001(4) 0.022(3) 0.006(4)
 N7 0.081(7) 0.070(5) 0.187(12) 0.049(6) -0.004(7) 0.031(5)
 N8 0.081(7) 0.070(5) 0.187(12) 0.049(6) -0.004(7) 0.031(5)
 C1 0.026(2) 0.0195(19) 0.031(2) 0.0143(17) 0.0086(17) 0.0056(16)
 C2 0.021(2) 0.030(2) 0.031(2) 0.0115(18) 0.0103(17) 0.0046(17)
 C3 0.040(2) 0.022(2) 0.030(2) 0.0143(18) 0.0139(19) 0.0039(18)
 C4 0.0206(19) 0.022(2) 0.031(2) 0.0147(18) -0.0019(16) 0.0028(16)
 C5 0.033(2) 0.0190(19) 0.029(2) 0.0133(17) 0.0059(18) -0.0011(17)
 C6 0.032(2) 0.024(2) 0.038(2) 0.0211(19) 0.0109(19) 0.0077(17)
 C7 0.023(2) 0.030(2) 0.040(2) 0.012(2) 0.0131(19) 0.0084(17)
 C8 0.031(2) 0.021(2) 0.031(2) 0.0147(18) 0.0014(18) 0.0071(17)
 C9 0.021(2) 0.032(2) 0.035(2) 0.0170(19) 0.0058(17) 0.0067(17)
 C10 0.020(2) 0.033(2) 0.047(3) 0.020(2) 0.0089(19) 0.0035(17)
 C11 0.042(3) 0.031(2) 0.030(2) 0.0183(19) 0.0067(19) 0.012(2)
 C12 0.034(2) 0.022(2) 0.036(2) 0.0174(19) 0.0073(19) 0.0085(17)
 C13 0.025(2) 0.024(2) 0.050(3) 0.014(2) 0.012(2) 0.0059(17)
 C14 0.025(2) 0.039(3) 0.039(2) 0.021(2) 0.0101(19) 0.0118(19)
 C15 0.033(2) 0.021(2) 0.030(2) 0.0138(18) 0.0153(18) 0.0059(17)
 C16 0.021(2) 0.029(2) 0.038(2) 0.0064(19) 0.0094(18) 0.0039(17)
 C17 0.045(3) 0.033(2) 0.031(2) 0.013(2) 0.007(2) -0.002(2)
 C18 0.087(5) 0.052(3) 0.026(2) 0.016(2) -0.002(3) -0.035(3)
 C19 0.088(5) 0.079(5) 0.044(3) 0.032(3) 0.035(3) 0.048(4)
 C20 0.055(4) 0.082(5) 0.057(4) 0.000(4) 0.019(3) 0.003(4)
 C21 0.026(2) 0.031(2) 0.029(2) 0.0109(19) 0.0105(18) 0.0076(18)
 C22 0.057(3) 0.033(2) 0.029(2) 0.020(2) 0.006(2) -0.003(2)
 C23 0.048(3) 0.027(2) 0.030(2) 0.0153(19) 0.011(2) 0.014(2)
 C24 0.056(3) 0.027(2) 0.026(2) 0.0118(19) -0.001(2) -0.010(2)
 C25 0.062(3) 0.032(2) 0.027(2) 0.019(2) 0.001(2) -0.012(2)
 C26 0.060(3) 0.033(2) 0.030(2) 0.019(2) 0.005(2) 0.023(2)
 C27 0.038(3) 0.031(2) 0.024(2) 0.0100(19) -0.0001(19) -0.0054(19)
 C28 0.060(3) 0.032(2) 0.027(2) 0.013(2) 0.006(2) 0.022(2)
 C29 0.058(3) 0.032(2) 0.029(2) 0.015(2) 0.002(2) -0.014(2)
 C30 0.142(9) 0.097(5) 0.183(11) 0.071(7) 0.026(7) 0.058(6)
 C31 0.087(7) 0.063(4) 0.122(14) 0.049(7) 0.023(7) 0.028(4)
 C32 0.142(9) 0.097(5) 0.183(11) 0.071(7) 0.026(7) 0.058(6)
 C33 0.142(9) 0.097(5) 0.183(11) 0.071(7) 0.026(7) 0.058(6)
 C34 0.087(7) 0.063(4) 0.122(14) 0.049(7) 0.023(7) 0.028(4)
 C35 0.142(9) 0.097(5) 0.183(11) 0.071(7) 0.026(7) 0.058(6)

_geom_special_details
;
 All esds (except the esd in the dihedral angle between two l.s. planes)
 are estimated using the full covariance matrix.  The cell esds are taken
 into account individually in the estimation of esds in distances, angles
 and torsion angles; correlations between esds in cell parameters are only
 used when they are defined by crystal symmetry.  An approximate (isotropic)
 treatment of cell esds is used for estimating esds involving l.s. planes.
;
loop_
  _geom_bond_atom_site_label_1
  _geom_bond_atom_site_label_2
  _geom_bond_distance
  _geom_bond_site_symmetry_2
  _geom_bond_publ_flag
 Zn1 O8 2.193(3) 2_665 ?
 Zn1 O8 2.193(3) . ?
 Zn1 O10 2.028(3) 2_665 ?
 Zn1 O10 2.028(3) . ?
 Zn1 O11 2.056(3) 2_665 ?
 Zn1 O11 2.056(3) . ?
 Zn2 O1 2.059(3) 2_775 ?
 Zn2 O1 2.059(3) . ?
 Zn2 O9 2.051(3) 2_765 ?
 Zn2 O9 2.051(3) 1_565 ?
 Zn2 O12 2.176(3) . ?
 Zn2 O12 2.176(3) 2_775 ?
 Zn3 O2 1.937(3) . ?
 Zn3 O3 1.975(3) . ?
 Zn3 O8 2.008(3) . ?
 Zn3 N2 1.993(4) . ?
 Zn4 O4 2.001(3) 1_565 ?
 Zn4 O5 1.982(3) . ?
 Zn4 O12 2.015(3) . ?
 Zn4 O13 2.335(5) . ?
 Zn4 N3 2.029(4) 2_776 ?
 O1 C15 1.246(5) . ?
 O2 C1 1.272(5) . ?
 O3 C4 1.273(5) . ?
 O4 C6 1.253(5) . ?
 O5 C15 1.273(6) . ?
 O6 C21 1.234(6) . ?
 O7 C14 1.232(6) . ?
 O8 C21 1.317(5) . ?
 O9 C6 1.245(5) . ?
 O10 C4 1.251(5) . ?
 O11 C1 1.247(5) . ?
 O12 C14 1.306(6) . ?
 O13 C31 1.229(19) . ?
 O13 C34 1.22(4) . ?
 N1 N5 1.381(8) . ?
 N1 C17 1.321(6) . ?
 N1 C18 1.419(6) . ?
 N2 C17 1.295(7) . ?
 N2 C19 1.380(7) . ?
 N3 C20 1.380(8) . ?
 N3 C27 1.310(7) . ?
 N4 N6 1.377(8) . ?
 N4 C18 1.456(7) . ?
 N4 C27 1.324(7) . ?
 N5 C19 1.311(8) . ?
 N6 C20 1.331(9) . ?
 N7 C30 1.421(17) . ?
 N7 C31 1.292(18) . ?
 N7 C32 1.409(19) . ?
 N8 C33 1.425(19) . ?
 N8 C34 1.33(2) . ?
 N8 C35 1.465(19) . ?
 C1 C5 1.496(5) . ?
 C2 C7 1.388(6) 2_565 ?
 C2 C16 1.390(6) . ?
 C2 C21 1.487(6) . ?
 C3 C15 1.494(6) . ?
 C3 C22 1.376(7) . ?
 C3 C29 1.398(6) . ?
 C4 C8 1.501(6) . ?
 C5 C24 1.387(6) . ?
 C5 C25 1.391(6) . ?
 C6 C12 1.512(6) . ?
 C7 H7 0.9500 . ?
 C7 C16 1.387(6) . ?
 C8 C11 1.388(6) . ?
 C8 C28 1.391(6) . ?
 C9 C10 1.388(7) . ?
 C9 C13 1.391(6) 2_875 ?
 C9 C14 1.497(6) . ?
 C10 H10 0.9500 . ?
 C10 C13 1.392(7) . ?
 C11 H11 0.9500 . ?
 C11 C23 1.387(6) . ?
 C12 C23 1.390(6) . ?
 C12 C26 1.388(7) . ?
 C13 H13 0.9500 . ?
 C16 H16 0.9500 . ?
 C17 H17 0.9500 . ?
 C18 H18A 0.9900 . ?
 C18 H18B 0.9900 . ?
 C19 H19 0.9500 . ?
 C20 H20 0.9500 . ?
 C22 H22 0.9500 . ?
 C22 C24 1.381(7) . ?
 C23 H23 0.9500 . ?
 C24 H24 0.9500 . ?
 C25 H25 0.9500 . ?
 C25 C29 1.383(7) . ?
 C26 H26 0.9500 . ?
 C26 C28 1.383(7) . ?
 C27 H27 0.9500 . ?
 C28 H28 0.9500 . ?
 C29 H29 0.9500 . ?
 C30 H30A 0.9800 . ?
 C30 H30B 0.9800 . ?
 C30 H30C 0.9800 . ?
 C31 H31 0.9500 . ?
 C32 H32A 0.9800 . ?
 C32 H32B 0.9800 . ?
 C32 H32C 0.9800 . ?
 C33 H33A 0.9800 . ?
 C33 H33B 0.9800 . ?
 C33 H33C 0.9800 . ?
 C34 H34 0.9500 . ?
 C35 H35A 0.9800 . ?
 C35 H35B 0.9800 . ?
 C35 H35C 0.9800 . ?
 O15 C37 1.231(19) . ?
 N9 C36 1.348(13) . ?
 N9 C37 1.352(18) . ?
 N9 C38 1.45(2) . ?
 C36 H36A 0.9800 . ?
 C36 H36B 0.9800 . ?
 C36 H36C 0.9800 . ?
 C37 H37 0.9500 . ?
 C38 H38A 0.9800 . ?
 C38 H38B 0.9800 . ?
 C38 H38C 0.9800 . ?
 O16 C40 1.47(4) . ?
 O20 C40 1.28(3) . ?
 N10 C39 1.390(15) . ?
 N10 C40 1.293(17) . ?
 N10 C41 1.46(2) . ?
 C39 H39A 0.9800 . ?
 C39 H39B 0.9800 . ?
 C39 H39C 0.9800 . ?
 C40 H40A 0.9500 . ?
 C40 H40 0.9500 . ?
 C41 H41A 0.9800 . ?
 C41 H41B 0.9800 . ?
 C41 H41C 0.9800 . ?
 O17 C42 1.242(13) . ?
 N11 C42 1.339(13) . ?
 N11 C43 1.440(18) . ?
 N11 C44 1.365(16) . ?
 C42 H42 0.9500 . ?
 C43 H43A 0.9800 . ?
 C43 H43B 0.9800 . ?
 C43 H43C 0.9800 . ?
 C44 H44A 0.9800 . ?
 C44 H44B 0.9800 . ?
 C44 H44C 0.9800 . ?
 O18 C46 1.207(18) . ?
 N12 C45 1.470(16) . ?
 N12 C46 1.35(2) . ?
 N12 C47 1.476(18) . ?
 C45 H45A 0.9800 . ?
 C45 H45B 0.9800 . ?
 C45 H45C 0.9800 . ?
 C46 H46 0.9500 . ?
 C47 H47A 0.9800 . ?
 C47 H47B 0.9800 . ?
 C47 H47C 0.9800 . ?

loop_
  _geom_angle_atom_site_label_1
  _geom_angle_atom_site_label_2
  _geom_angle_atom_site_label_3
  _geom_angle
  _geom_angle_site_symmetry_1
  _geom_angle_site_symmetry_3
  _geom_angle_publ_flag
 O8 Zn1 O8 180.0 . 2_665 ?
 O10 Zn1 O8 90.52(11) 2_665 2_665 ?
 O10 Zn1 O8 89.47(11) 2_665 . ?
 O10 Zn1 O8 90.53(11) . . ?
 O10 Zn1 O8 89.47(11) . 2_665 ?
 O10 Zn1 O10 180.0 2_665 . ?
 O10 Zn1 O11 94.44(13) . . ?
 O10 Zn1 O11 85.56(13) . 2_665 ?
 O10 Zn1 O11 94.44(13) 2_665 2_665 ?
 O10 Zn1 O11 85.56(13) 2_665 . ?
 O11 Zn1 O8 90.02(12) 2_665 2_665 ?
 O11 Zn1 O8 89.98(12) 2_665 . ?
 O11 Zn1 O8 90.02(12) . . ?
 O11 Zn1 O8 89.98(12) . 2_665 ?
 O11 Zn1 O11 180.0 2_665 . ?
 O1 Zn2 O1 180.00(9) . 2_775 ?
 O1 Zn2 O12 91.33(12) 2_775 . ?
 O1 Zn2 O12 88.67(12) . . ?
 O1 Zn2 O12 88.67(12) 2_775 2_775 ?
 O1 Zn2 O12 91.33(12) . 2_775 ?
 O9 Zn2 O1 86.20(12) 1_565 2_775 ?
 O9 Zn2 O1 93.80(12) 1_565 . ?
 O9 Zn2 O1 93.80(12) 2_765 2_775 ?
 O9 Zn2 O1 86.20(12) 2_765 . ?
 O9 Zn2 O9 180.0 2_765 1_565 ?
 O9 Zn2 O12 91.12(12) 2_765 2_775 ?
 O9 Zn2 O12 88.88(12) 2_765 . ?
 O9 Zn2 O12 91.12(12) 1_565 . ?
 O9 Zn2 O12 88.88(12) 1_565 2_775 ?
 O12 Zn2 O12 180.00(16) 2_775 . ?
 O2 Zn3 O3 110.37(14) . . ?
 O2 Zn3 O8 116.17(12) . . ?
 O2 Zn3 N2 112.84(15) . . ?
 O3 Zn3 O8 98.70(12) . . ?
 O3 Zn3 N2 97.51(16) . . ?
 N2 Zn3 O8 118.04(15) . . ?
 O4 Zn4 O12 104.78(13) 1_565 . ?
 O4 Zn4 O13 169.97(17) 1_565 . ?
 O4 Zn4 N3 87.33(17) 1_565 2_776 ?
 O5 Zn4 O4 103.55(15) . 1_565 ?
 O5 Zn4 O12 100.13(13) . . ?
 O5 Zn4 O13 82.57(18) . . ?
 O5 Zn4 N3 107.79(16) . 2_776 ?
 O12 Zn4 O13 81.62(17) . . ?
 O12 Zn4 N3 146.05(17) . 2_776 ?
 N3 Zn4 O13 83.20(19) 2_776 . ?
 C15 O1 Zn2 137.8(3) . . ?
 C1 O2 Zn3 118.4(3) . . ?
 C4 O3 Zn3 118.7(3) . . ?
 C6 O4 Zn4 128.0(3) . 1_545 ?
 C15 O5 Zn4 117.9(3) . . ?
 Zn3 O8 Zn1 100.03(11) . . ?
 C21 O8 Zn1 123.8(3) . . ?
 C21 O8 Zn3 101.5(2) . . ?
 C6 O9 Zn2 132.0(3) . 1_545 ?
 C4 O10 Zn1 137.7(3) . . ?
 C1 O11 Zn1 141.7(3) . . ?
 Zn4 O12 Zn2 105.77(13) . . ?
 C14 O12 Zn2 128.4(3) . . ?
 C14 O12 Zn4 100.9(3) . . ?
 C31 O13 Zn4 119.4(18) . . ?
 C34 O13 Zn4 119(3) . . ?
 N5 N1 C18 119.3(5) . . ?
 C17 N1 N5 108.7(4) . . ?
 C17 N1 C18 132.0(6) . . ?
 C17 N2 Zn3 127.2(4) . . ?
 C17 N2 C19 103.6(4) . . ?
 C19 N2 Zn3 129.2(4) . . ?
 C20 N3 Zn4 126.5(4) . 2_776 ?
 C27 N3 Zn4 128.1(4) . 2_776 ?
 C27 N3 C20 104.0(5) . . ?
 N6 N4 C18 119.9(5) . . ?
 C27 N4 N6 110.8(5) . . ?
 C27 N4 C18 129.3(6) . . ?
 C19 N5 N1 103.2(5) . . ?
 C20 N6 N4 101.7(5) . . ?
 C31 N7 C30 121(2) . . ?
 C31 N7 C32 118(3) . . ?
 C32 N7 C30 120(2) . . ?
 C33 N8 C35 125(3) . . ?
 C34 N8 C33 122(4) . . ?
 C34 N8 C35 113(4) . . ?
 O2 C1 C5 116.9(4) . . ?
 O11 C1 O2 125.8(4) . . ?
 O11 C1 C5 117.4(4) . . ?
 C7 C2 C16 120.1(4) 2_565 . ?
 C7 C2 C21 120.2(4) 2_565 . ?
 C16 C2 C21 119.7(4) . . ?
 C22 C3 C15 119.8(4) . . ?
 C22 C3 C29 119.4(4) . . ?
 C29 C3 C15 120.7(4) . . ?
 O3 C4 C8 117.1(4) . . ?
 O10 C4 O3 125.1(4) . . ?
 O10 C4 C8 117.8(4) . . ?
 C24 C5 C1 119.4(4) . . ?
 C24 C5 C25 119.7(4) . . ?
 C25 C5 C1 120.9(4) . . ?
 O4 C6 C12 115.6(4) . . ?
 O9 C6 O4 127.1(4) . . ?
 O9 C6 C12 117.2(4) . . ?
 C2 C7 H7 120.3 2_565 . ?
 C16 C7 C2 119.3(4) . 2_565 ?
 C16 C7 H7 120.3 . . ?
 C11 C8 C4 119.9(4) . . ?
 C11 C8 C28 119.6(4) . . ?
 C28 C8 C4 120.5(4) . . ?
 C10 C9 C13 120.2(4) . 2_875 ?
 C10 C9 C14 120.0(4) . . ?
 C13 C9 C14 119.6(4) 2_875 . ?
 C9 C10 H10 120.1 . . ?
 C9 C10 C13 119.8(4) . . ?
 C13 C10 H10 120.1 . . ?
 C8 C11 H11 119.9 . . ?
 C23 C11 C8 120.2(4) . . ?
 C23 C11 H11 119.9 . . ?
 C23 C12 C6 120.2(4) . . ?
 C26 C12 C6 120.3(4) . . ?
 C26 C12 C23 119.5(4) . . ?
 C9 C13 C10 120.0(4) 2_875 . ?
 C9 C13 H13 120.0 2_875 . ?
 C10 C13 H13 120.0 . . ?
 O7 C14 O12 120.8(4) . . ?
 O7 C14 C9 122.0(4) . . ?
 O12 C14 C9 117.1(4) . . ?
 O1 C15 O5 124.5(4) . . ?
 O1 C15 C3 118.5(4) . . ?
 O5 C15 C3 116.9(4) . . ?
 C2 C16 H16 119.7 . . ?
 C7 C16 C2 120.6(4) . . ?
 C7 C16 H16 119.7 . . ?
 N1 C17 H17 124.2 . . ?
 N2 C17 N1 111.6(5) . . ?
 N2 C17 H17 124.2 . . ?
 N1 C18 N4 108.3(4) . . ?
 N1 C18 H18A 110.0 . . ?
 N1 C18 H18B 110.0 . . ?
 N4 C18 H18A 110.0 . . ?
 N4 C18 H18B 110.0 . . ?
 H18A C18 H18B 108.4 . . ?
 N2 C19 H19 123.6 . . ?
 N5 C19 N2 112.9(6) . . ?
 N5 C19 H19 123.6 . . ?
 N3 C20 H20 123.4 . . ?
 N6 C20 N3 113.2(6) . . ?
 N6 C20 H20 123.4 . . ?
 O6 C21 O8 121.2(4) . . ?
 O6 C21 C2 121.0(4) . . ?
 O8 C21 C2 117.7(4) . . ?
 C3 C22 H22 119.6 . . ?
 C3 C22 C24 120.8(4) . . ?
 C24 C22 H22 119.6 . . ?
 C11 C23 C12 120.2(4) . . ?
 C11 C23 H23 119.9 . . ?
 C12 C23 H23 119.9 . . ?
 C5 C24 H24 120.0 . . ?
 C22 C24 C5 120.0(4) . . ?
 C22 C24 H24 120.0 . . ?
 C5 C25 H25 120.0 . . ?
 C29 C25 C5 120.1(4) . . ?
 C29 C25 H25 120.0 . . ?
 C12 C26 H26 119.8 . . ?
 C28 C26 C12 120.4(4) . . ?
 C28 C26 H26 119.8 . . ?
 N3 C27 N4 110.0(5) . . ?
 N3 C27 H27 125.0 . . ?
 N4 C27 H27 125.0 . . ?
 C8 C28 H28 119.9 . . ?
 C26 C28 C8 120.1(4) . . ?
 C26 C28 H28 119.9 . . ?
 C3 C29 H29 120.0 . . ?
 C25 C29 C3 120.0(4) . . ?
 C25 C29 H29 120.0 . . ?
 N7 C30 H30A 109.5 . . ?
 N7 C30 H30B 109.5 . . ?
 N7 C30 H30C 109.5 . . ?
 H30A C30 H30B 109.5 . . ?
 H30A C30 H30C 109.5 . . ?
 H30B C30 H30C 109.5 . . ?
 O13 C31 N7 132(3) . . ?
 O13 C31 H31 114.2 . . ?
 N7 C31 H31 114.2 . . ?
 N7 C32 H32A 109.5 . . ?
 N7 C32 H32B 109.5 . . ?
 N7 C32 H32C 109.5 . . ?
 H32A C32 H32B 109.5 . . ?
 H32A C32 H32C 109.5 . . ?
 H32B C32 H32C 109.5 . . ?
 N8 C33 H33A 109.5 . . ?
 N8 C33 H33B 109.5 . . ?
 N8 C33 H33C 109.5 . . ?
 H33A C33 H33B 109.5 . . ?
 H33A C33 H33C 109.5 . . ?
 H33B C33 H33C 109.5 . . ?
 O13 C34 N8 130(5) . . ?
 O13 C34 H34 115.0 . . ?
 N8 C34 H34 115.0 . . ?
 N8 C35 H35A 109.5 . . ?
 N8 C35 H35B 109.5 . . ?
 N8 C35 H35C 109.5 . . ?
 H35A C35 H35B 109.5 . . ?
 H35A C35 H35C 109.5 . . ?
 H35B C35 H35C 109.5 . . ?
 C36 N9 C37 124.2(14) . . ?
 C36 N9 C38 117.9(13) . . ?
 C37 N9 C38 117.9(15) . . ?
 N9 C36 H36A 109.5 . . ?
 N9 C36 H36B 109.5 . . ?
 N9 C36 H36C 109.5 . . ?
 H36A C36 H36B 109.5 . . ?
 H36A C36 H36C 109.5 . . ?
 H36B C36 H36C 109.5 . . ?
 O15 C37 N9 120.7(17) . . ?
 O15 C37 H37 119.7 . . ?
 N9 C37 H37 119.7 . . ?
 N9 C38 H38A 109.5 . . ?
 N9 C38 H38B 109.5 . . ?
 N9 C38 H38C 109.5 . . ?
 H38A C38 H38B 109.5 . . ?
 H38A C38 H38C 109.5 . . ?
 H38B C38 H38C 109.5 . . ?
 C39 N10 C41 118.5(14) . . ?
 C40 N10 C39 121.2(13) . . ?
 C40 N10 C41 119.8(15) . . ?
 N10 C39 H39A 109.5 . . ?
 N10 C39 H39B 109.5 . . ?
 N10 C39 H39C 109.5 . . ?
 H39A C39 H39B 109.5 . . ?
 H39A C39 H39C 109.5 . . ?
 H39B C39 H39C 109.5 . . ?
 O16 C40 H40A 111.6 . . ?
 O20 C40 N10 118(2) . . ?
 O20 C40 H40 120.9 . . ?
 N10 C40 O16 137(2) . . ?
 N10 C40 H40A 111.6 . . ?
 N10 C40 H40 120.9 . . ?
 N10 C41 H41A 109.5 . . ?
 N10 C41 H41B 109.5 . . ?
 N10 C41 H41C 109.5 . . ?
 H41A C41 H41B 109.5 . . ?
 H41A C41 H41C 109.5 . . ?
 H41B C41 H41C 109.5 . . ?
 C42 N11 C43 108.8(11) . . ?
 C42 N11 C44 135.5(11) . . ?
 C44 N11 C43 113.0(11) . . ?
 O17 C42 N11 123.2(12) . . ?
 O17 C42 H42 118.4 . . ?
 N11 C42 H42 118.4 . . ?
 N11 C43 H43A 109.5 . . ?
 N11 C43 H43B 109.5 . . ?
 N11 C43 H43C 109.5 . . ?
 H43A C43 H43B 109.5 . . ?
 H43A C43 H43C 109.5 . . ?
 H43B C43 H43C 109.5 . . ?
 N11 C44 H44A 109.5 . . ?
 N11 C44 H44B 109.5 . . ?
 N11 C44 H44C 109.5 . . ?
 H44A C44 H44B 109.5 . . ?
 H44A C44 H44C 109.5 . . ?
 H44B C44 H44C 109.5 . . ?
 C45 N12 C47 116.7(17) . . ?
 C46 N12 C45 118.6(15) . . ?
 C46 N12 C47 124.7(16) . . ?
 N12 C45 H45A 109.5 . . ?
 N12 C45 H45B 109.5 . . ?
 N12 C45 H45C 109.5 . . ?
 H45A C45 H45B 109.5 . . ?
 H45A C45 H45C 109.5 . . ?
 H45B C45 H45C 109.5 . . ?
 O18 C46 N12 128.4(17) . . ?
 O18 C46 H46 115.8 . . ?
 N12 C46 H46 115.8 . . ?
 N12 C47 H47A 109.5 . . ?
 N12 C47 H47B 109.5 . . ?
 N12 C47 H47C 109.5 . . ?
 H47A C47 H47B 109.5 . . ?
 H47A C47 H47C 109.5 . . ?
 H47B C47 H47C 109.5 . . ?

loop_
  _geom_torsion_atom_site_label_1
  _geom_torsion_atom_site_label_2
  _geom_torsion_atom_site_label_3
  _geom_torsion_atom_site_label_4
  _geom_torsion
  _geom_torsion_site_symmetry_1
  _geom_torsion_site_symmetry_2
  _geom_torsion_site_symmetry_3
  _geom_torsion_site_symmetry_4
  _geom_torsion_publ_flag
 Zn1 O8 C21 O6 -101.6(5) . . . . ?
 Zn1 O8 C21 C2 81.5(4) . . . . ?
 Zn1 O10 C4 O3 -39.0(7) . . . . ?
 Zn1 O10 C4 C8 141.5(4) . . . . ?
 Zn1 O11 C1 O2 -15.6(8) . . . . ?
 Zn1 O11 C1 C5 165.5(3) . . . . ?
 Zn2 O1 C15 O5 53.2(7) . . . . ?
 Zn2 O1 C15 C3 -126.3(4) . . . . ?
 Zn2 O9 C6 O4 19.0(7) 1_545 . . . ?
 Zn2 O9 C6 C12 -160.8(3) 1_545 . . . ?
 Zn2 O12 C14 O7 107.7(5) . . . . ?
 Zn2 O12 C14 C9 -77.1(5) . . . . ?
 Zn3 O2 C1 O11 -7.6(6) . . . . ?
 Zn3 O2 C1 C5 171.4(3) . . . . ?
 Zn3 O3 C4 O10 5.7(6) . . . . ?
 Zn3 O3 C4 C8 -174.7(3) . . . . ?
 Zn3 O8 C21 O6 8.8(5) . . . . ?
 Zn3 O8 C21 C2 -168.1(3) . . . . ?
 Zn3 N2 C17 N1 -179.7(3) . . . . ?
 Zn3 N2 C19 N5 179.4(5) . . . . ?
 Zn4 O4 C6 O9 12.2(7) 1_545 . . . ?
 Zn4 O4 C6 C12 -168.0(3) 1_545 . . . ?
 Zn4 O5 C15 O1 -12.3(6) . . . . ?
 Zn4 O5 C15 C3 167.2(3) . . . . ?
 Zn4 O12 C14 O7 -12.7(5) . . . . ?
 Zn4 O12 C14 C9 162.5(3) . . . . ?
 Zn4 O13 C31 N7 142(4) . . . . ?
 Zn4 O13 C34 N8 -175(5) . . . . ?
 Zn4 N3 C20 N6 170.9(6) 2_776 . . . ?
 Zn4 N3 C27 N4 -172.2(4) 2_776 . . . ?
 O2 C1 C5 C24 -167.9(4) . . . . ?
 O2 C1 C5 C25 13.5(7) . . . . ?
 O3 C4 C8 C11 171.0(4) . . . . ?
 O3 C4 C8 C28 -7.3(6) . . . . ?
 O4 C6 C12 C23 173.5(4) . . . . ?
 O4 C6 C12 C26 -7.1(7) . . . . ?
 O9 C6 C12 C23 -6.6(6) . . . . ?
 O9 C6 C12 C26 172.8(5) . . . . ?
 O10 C4 C8 C11 -9.4(6) . . . . ?
 O10 C4 C8 C28 172.2(4) . . . . ?
 O11 C1 C5 C24 11.2(6) . . . . ?
 O11 C1 C5 C25 -167.4(5) . . . . ?
 N1 N5 C19 N2 -0.4(9) . . . . ?
 N4 N6 C20 N3 -0.6(10) . . . . ?
 N5 N1 C17 N2 1.3(6) . . . . ?
 N5 N1 C18 N4 -83.7(7) . . . . ?
 N6 N4 C18 N1 -69.8(9) . . . . ?
 N6 N4 C27 N3 5.1(7) . . . . ?
 C1 C5 C24 C22 -179.5(5) . . . . ?
 C1 C5 C25 C29 178.7(5) . . . . ?
 C2 C7 C16 C2 -0.5(8) 2_565 . . . ?
 C3 C22 C24 C5 0.3(9) . . . . ?
 C4 C8 C11 C23 -177.8(4) . . . . ?
 C4 C8 C28 C26 179.0(5) . . . . ?
 C5 C25 C29 C3 1.2(9) . . . . ?
 C6 C12 C23 C11 -179.8(4) . . . . ?
 C6 C12 C26 C28 -179.0(5) . . . . ?
 C7 C2 C16 C7 0.5(8) 2_565 . . . ?
 C7 C2 C21 O6 -167.6(5) 2_565 . . . ?
 C7 C2 C21 O8 9.3(6) 2_565 . . . ?
 C8 C11 C23 C12 -1.3(8) . . . . ?
 C9 C10 C13 C9 1.3(8) . . . 2_875 ?
 C10 C9 C14 O7 162.3(5) . . . . ?
 C10 C9 C14 O12 -12.9(6) . . . . ?
 C11 C8 C28 C26 0.6(8) . . . . ?
 C12 C26 C28 C8 -1.1(9) . . . . ?
 C13 C9 C10 C13 -1.3(8) 2_875 . . . ?
 C13 C9 C14 O7 -13.8(7) 2_875 . . . ?
 C13 C9 C14 O12 171.0(4) 2_875 . . . ?
 C14 C9 C10 C13 -177.4(4) . . . . ?
 C15 C3 C22 C24 178.7(5) . . . . ?
 C15 C3 C29 C25 -179.4(5) . . . . ?
 C16 C2 C21 O6 10.9(7) . . . . ?
 C16 C2 C21 O8 -172.2(4) . . . . ?
 C17 N1 N5 C19 -0.5(7) . . . . ?
 C17 N1 C18 N4 93.2(7) . . . . ?
 C17 N2 C19 N5 1.1(8) . . . . ?
 C18 N1 N5 C19 177.1(6) . . . . ?
 C18 N1 C17 N2 -175.9(5) . . . . ?
 C18 N4 N6 C20 -179.8(6) . . . . ?
 C18 N4 C27 N3 -178.0(6) . . . . ?
 C19 N2 C17 N1 -1.4(6) . . . . ?
 C20 N3 C27 N4 -5.1(7) . . . . ?
 C21 C2 C16 C7 -178.0(4) . . . . ?
 C22 C3 C15 O1 5.6(7) . . . . ?
 C22 C3 C15 O5 -174.0(4) . . . . ?
 C22 C3 C29 C25 -1.7(8) . . . . ?
 C23 C12 C26 C28 0.4(8) . . . . ?
 C24 C5 C25 C29 0.1(8) . . . . ?
 C25 C5 C24 C22 -0.8(8) . . . . ?
 C26 C12 C23 C11 0.8(8) . . . . ?
 C27 N3 C20 N6 3.5(9) . . . . ?
 C27 N4 N6 C20 -2.7(9) . . . . ?
 C27 N4 C18 N1 113.6(7) . . . . ?
 C28 C8 C11 C23 0.6(8) . . . . ?
 C29 C3 C15 O1 -176.7(5) . . . . ?
 C29 C3 C15 O5 3.7(7) . . . . ?
 C29 C3 C22 C24 0.9(8) . . . . ?
 C30 N7 C31 O13 166(4) . . . . ?
 C32 N7 C31 O13 -21(6) . . . . ?
 C33 N8 C34 O13 -171(5) . . . . ?
 C35 N8 C34 O13 18(8) . . . . ?
 C36 N9 C37 O15 -9(3) . . . . ?
 C38 N9 C37 O15 170.5(16) . . . . ?
 C39 N10 C40 O16 -18(3) . . . . ?
 C39 N10 C40 O20 174(2) . . . . ?
 C41 N10 C40 O16 170(3) . . . . ?
 C41 N10 C40 O20 2(3) . . . . ?
 C43 N11 C42 O17 9.6(17) . . . . ?
 C44 N11 C42 O17 169.1(14) . . . . ?
 C45 N12 C46 O18 -3(3) . . . . ?
 C47 N12 C46 O18 175.2(19) . . . . ?

_smtbx_masks_special_details       ?
loop_
  _smtbx_masks_void_nr
  _smtbx_masks_void_average_x
  _smtbx_masks_void_average_y
  _smtbx_masks_void_average_z
  _smtbx_masks_void_volume
  _smtbx_masks_void_count_electrons
  _smtbx_masks_void_content
 1 0.045 0.000 0.500 294.9 71.9 ?

_shelx_res_file
;
TITL tgs125_a.res in P-1
    tgs125.res
    created by SHELXL-2017/1 at 20:24:27 on 16-Sep-2022
REM Old TITL tgs125 in P-1
REM SHELXT solution in P-1
REM R1 0.126, Rweak 0.004, Alpha 0.057, Orientation as input
REM Formula found by SHELXT: C82 N11 O28 Zn6
CELL 0.71073 9.7232 18.204 18.6259 117.577 102.5 92.264
ZERR 2 0.0013 0.0025 0.0025 0.004 0.005 0.005
LATT 1
SFAC C H N O Zn
UNIT 85 99 21 33 6
DFIX 1.25 O13 C31
DFIX 1.35 N8 C34 N7 C31
DFIX 1.5 C47 N12 N12 C45
DFIX 1.45 N8 C33 N7 C30 N8 C35 N7 C32
RIGU O13 N7 C30 C31 C32
RIGU N8 C33 C34 C35
EADP C34 C31
EADP N8 N7
EADP C33 C30 C35 C32

L.S. 16
PLAN  20
SIZE 0.1 0.25 0.35
TEMP -123(2)
BOND $H
list 4
MORE -1
CONF
fmap 2
acta
ABIN
OMIT 0 -3 2
OMIT -1 2 0
OMIT -2 1 3
OMIT 0 -1 2
OMIT -1 3 0
OMIT 0 1 1
REM <olex2.extras>
REM <HklSrc "%.\\tgs125.hkl">
REM </olex2.extras>

WGHT    0.106400    8.108500
FVAR       0.35546   0.59805
ZN1   5    0.500000    0.500000    0.000000    10.50000    0.01683    0.01450 =
         0.01784    0.00882    0.00336    0.00419
ZN2   5    1.000000    1.000000    0.000000    10.50000    0.02043    0.01561 =
         0.02140    0.01041    0.00799    0.00473
ZN3   5    0.541789    0.594305    0.200146    11.00000    0.02540    0.01749 =
         0.01979    0.00968    0.00760    0.00404
ZN4   5    1.153621    1.110432    0.206477    11.00000    0.02425    0.01604 =
         0.02172    0.00812    0.00217    0.00145
O1    4    0.898471    0.983282    0.078838    11.00000    0.02880    0.03374 =
         0.04191    0.02718    0.01863    0.00960
O2    4    0.656107    0.684753    0.201480    11.00000    0.03551    0.02406 =
         0.03056    0.01685    0.00511   -0.00182
O3    4    0.656038    0.505724    0.195890    11.00000    0.04756    0.02557 =
         0.02849    0.01431    0.00330    0.01511
O4    4    1.021358    0.182555    0.182484    11.00000    0.04911    0.03443 =
         0.04238    0.02514    0.01543    0.02331
O5    4    1.025273    1.025612    0.210147    11.00000    0.05504    0.02421 =
         0.03161    0.01430    0.01356   -0.00455
O6    4    0.309579    0.644910    0.166444    11.00000    0.02908    0.04046 =
         0.04492    0.00304    0.00361    0.00637
O7    4    1.354654    1.156500    0.163702    11.00000    0.03787    0.04049 =
         0.06004   -0.00071    0.02021    0.00344
O8    4    0.383900    0.524372    0.095410    11.00000    0.01906    0.02971 =
         0.02602    0.01472    0.00688    0.00448
O9    4    0.969193    0.122438    0.042401    11.00000    0.03846    0.02115 =
         0.04391    0.01981    0.01949    0.01369
O10   4    0.660735    0.467721    0.063720    11.00000    0.02553    0.03686 =
         0.03826    0.02757    0.00836    0.01339
O11   4    0.587572    0.624978    0.060998    11.00000    0.04066    0.01821 =
         0.02945    0.01075    0.00833   -0.00119
O12   4    1.200256    1.038669    0.096814    11.00000    0.02747    0.03460 =
         0.03690    0.02208    0.01458    0.01000
O13   4    1.330427    1.048346    0.254370    11.00000    0.07787    0.05637 =
         0.09080    0.03572    0.01115    0.02244
N1    3    0.499305    0.629499    0.427955    11.00000    0.05302    0.03818 =
         0.02312    0.00998    0.01071   -0.00706
N2    3    0.501978    0.625867    0.310497    11.00000    0.05127    0.03742 =
         0.02811    0.01330    0.01565    0.00301
N3    3    0.773609    0.792289    0.675004    11.00000    0.04961    0.04415 =
         0.03420    0.01427    0.00350   -0.00554
N4    3    0.644239    0.683543    0.564277    11.00000    0.06181    0.05581 =
         0.03125    0.01567    0.00865   -0.01168
N5    3    0.415588    0.687509    0.423240    11.00000    0.09445    0.09016 =
         0.04750    0.03429    0.03896    0.04124
N6    3    0.779997    0.678959    0.553602    11.00000    0.06581    0.09858 =
         0.06310   -0.00144    0.02246    0.00553
PART 1
N7    3    1.378789    0.914912    0.217937    21.00000    0.08149    0.06973 =
         0.18671    0.04883   -0.00390    0.03111
PART 0
PART 2
N8    3    1.392503    0.922722    0.243295   -21.00000    0.08149    0.06973 =
         0.18671    0.04883   -0.00390    0.03111
PART 0
C1    1    0.650108    0.683680    0.132114    11.00000    0.02606    0.01947 =
         0.03141    0.01426    0.00857    0.00562
C2    1    0.137879    0.534688    0.050942    11.00000    0.02140    0.02973 =
         0.03066    0.01149    0.01033    0.00459
C3    1    0.857552    0.900713    0.141584    11.00000    0.03995    0.02237 =
         0.03037    0.01428    0.01388    0.00391
C4    1    0.687350    0.458703    0.127705    11.00000    0.02058    0.02193 =
         0.03077    0.01469   -0.00187    0.00276
C5    1    0.722725    0.760297    0.136637    11.00000    0.03311    0.01904 =
         0.02897    0.01326    0.00587   -0.00114
C6    1    0.968741    0.179274    0.113246    11.00000    0.03190    0.02437 =
         0.03760    0.02108    0.01086    0.00765
C7    1   -0.104745    0.551050    0.004227    11.00000    0.02315    0.02979 =
         0.03978    0.01190    0.01311    0.00844
AFIX  43
H7    2   -0.175994    0.585840    0.007323    11.00000   -1.20000
AFIX   0
C8    1    0.763003    0.387417    0.124575    11.00000    0.03081    0.02080 =
         0.03076    0.01474    0.00144    0.00713
C9    1    1.409851    1.040145    0.049460    11.00000    0.02052    0.03186 =
         0.03513    0.01700    0.00584    0.00674
C10   1    1.385119    0.953205    0.001749    11.00000    0.01961    0.03297 =
         0.04695    0.02012    0.00886    0.00350
AFIX  43
H10   2    1.307383    0.921247    0.003395    11.00000   -1.20000
AFIX   0
C11   1    0.782430    0.327090    0.048938    11.00000    0.04189    0.03075 =
         0.02960    0.01826    0.00673    0.01202
AFIX  43
H11   2    0.750793    0.332080   -0.000340    11.00000   -1.20000
AFIX   0
C12   1    0.896972    0.252747    0.117296    11.00000    0.03368    0.02200 =
         0.03615    0.01739    0.00734    0.00853
C13   1    1.474629    0.913032   -0.048508    11.00000    0.02510    0.02444 =
         0.04954    0.01421    0.01154    0.00588
AFIX  43
H13   2    1.456836    0.853642   -0.082155    11.00000   -1.20000
AFIX   0
C14   1    1.317752    1.083508    0.106405    11.00000    0.02539    0.03927 =
         0.03933    0.02096    0.01011    0.01185
C15   1    0.931424    0.975057    0.142886    11.00000    0.03281    0.02060 =
         0.03041    0.01378    0.01529    0.00593
C16   1    0.033481    0.585388    0.054783    11.00000    0.02135    0.02851 =
         0.03765    0.00642    0.00944    0.00387
AFIX  43
H16   2    0.056984    0.644072    0.092358    11.00000   -1.20000
AFIX   0
C17   1    0.545644    0.594652    0.359721    11.00000    0.04466    0.03264 =
         0.03082    0.01318    0.00655   -0.00171
AFIX  43
H17   2    0.603811    0.551970    0.348187    11.00000   -1.20000
AFIX   0
C18   1    0.525428    0.619537    0.500671    11.00000    0.08732    0.05227 =
         0.02561    0.01614   -0.00184   -0.03481
AFIX  23
H18A  2    0.549068    0.562929    0.486911    11.00000   -1.20000
H18B  2    0.439279    0.625723    0.521892    11.00000   -1.20000
AFIX   0
C19   1    0.419562    0.683111    0.351449    11.00000    0.08819    0.07942 =
         0.04413    0.03175    0.03529    0.04835
AFIX  43
H19   2    0.370856    0.715869    0.329905    11.00000   -1.20000
AFIX   0
C20   1    0.855587    0.746515    0.623133    11.00000    0.05477    0.08177 =
         0.05748    0.00030    0.01878    0.00323
AFIX  43
H20   2    0.955919    0.761690    0.635775    11.00000   -1.20000
AFIX   0
C21   1    0.284148    0.572335    0.107661    11.00000    0.02616    0.03139 =
         0.02859    0.01088    0.01047    0.00756
C22   1    0.764729    0.839639    0.068370    11.00000    0.05669    0.03309 =
         0.02876    0.02028    0.00644   -0.00276
AFIX  43
H22   2    0.746663    0.845751    0.019367    11.00000   -1.20000
AFIX   0
C23   1    0.847939    0.259510    0.045105    11.00000    0.04787    0.02661 =
         0.03008    0.01535    0.01111    0.01386
AFIX  43
H23   2    0.859309    0.217742   -0.007017    11.00000   -1.20000
AFIX   0
C24   1    0.697566    0.769600    0.065308    11.00000    0.05638    0.02724 =
         0.02616    0.01176   -0.00097   -0.00980
AFIX  43
H24   2    0.634082    0.727750    0.014322    11.00000   -1.20000
AFIX   0
C25   1    0.817185    0.821288    0.210756    11.00000    0.06240    0.03228 =
         0.02730    0.01896    0.00068   -0.01202
AFIX  43
H25   2    0.834866    0.815160    0.259747    11.00000   -1.20000
AFIX   0
C26   1    0.878356    0.313525    0.192950    11.00000    0.05977    0.03296 =
         0.02955    0.01887    0.00530    0.02278
AFIX  43
H26   2    0.912297    0.309366    0.242539    11.00000   -1.20000
AFIX   0
C27   1    0.645275    0.748106    0.637585    11.00000    0.03764    0.03088 =
         0.02437    0.01001   -0.00008   -0.00538
AFIX  43
H27   2    0.564755    0.760549    0.659775    11.00000   -1.20000
AFIX   0
C28   1    0.810709    0.380114    0.196626    11.00000    0.05978    0.03243 =
         0.02655    0.01317    0.00648    0.02241
AFIX  43
H28   2    0.796802    0.420936    0.248448    11.00000   -1.20000
AFIX   0
C29   1    0.885428    0.890867    0.213230    11.00000    0.05800    0.03200 =
         0.02855    0.01513    0.00198   -0.01380
AFIX  43
H29   2    0.951259    0.931980    0.263622    11.00000   -1.20000
AFIX   0
PART 1
C30   1    1.336456    0.839682    0.218650    21.00000    0.14198    0.09670 =
         0.18264    0.07127    0.02577    0.05776
AFIX 137
H30A  2    1.372511    0.847281    0.275420    21.00000   -1.50000
H30B  2    1.375631    0.793630    0.179417    21.00000   -1.50000
H30C  2    1.232034    0.826261    0.201604    21.00000   -1.50000
AFIX   0
C31   1    1.303017    0.974619    0.237045    21.00000    0.08657    0.06273 =
         0.12236    0.04923    0.02280    0.02835
AFIX  43
H31   2    1.209376    0.958669    0.237843    21.00000   -1.20000
AFIX   0
C32   1    1.496093    0.922381    0.187349    21.00000    0.14198    0.09670 =
         0.18264    0.07127    0.02577    0.05776
AFIX 137
H32A  2    1.557075    0.976776    0.226245    21.00000   -1.50000
H32B  2    1.461675    0.918442    0.131996    21.00000   -1.50000
H32C  2    1.551128    0.877120    0.182529    21.00000   -1.50000
AFIX   0
PART 0
PART 2
C33   1    1.365587    0.833714    0.192010   -21.00000    0.14198    0.09670 =
         0.18264    0.07127    0.02577    0.05776
AFIX 137
H33A  2    1.264799    0.812793    0.181252   -21.00000   -1.50000
H33B  2    1.425502    0.808294    0.220951   -21.00000   -1.50000
H33C  2    1.387953    0.818855    0.138567   -21.00000   -1.50000
AFIX   0
C34   1    1.313333    0.971711    0.222999   -21.00000    0.08657    0.06273 =
         0.12236    0.04923    0.02280    0.02835
AFIX  43
H34   2    1.230931    0.942810    0.177152   -21.00000   -1.20000
AFIX   0
C35   1    1.489141    0.968147    0.328003   -21.00000    0.14198    0.09670 =
         0.18264    0.07127    0.02577    0.05776
AFIX 133
H35A  2    1.478529    0.937811    0.358841   -21.00000   -1.50000
H35B  2    1.465692    1.024604    0.357583   -21.00000   -1.50000
H35C  2    1.587866    0.972423    0.324266   -21.00000   -1.50000
AFIX   0

PART 0
O15   4    1.306320    0.701453    0.611830    11.00000    0.14275
N9    3    1.237247    0.828135    0.660789    11.00000    0.12140
C36   1    1.278051    0.849145    0.742674    11.00000    0.12059
AFIX 137
H36A  2    1.193813    0.854177    0.764514    11.00000   -1.50000
H36B  2    1.342943    0.902944    0.774147    11.00000   -1.50000
H36C  2    1.327072    0.805593    0.748911    11.00000   -1.50000
AFIX   0
C37   1    1.244200    0.752669    0.597288    11.00000    0.17941
AFIX  43
H37   2    1.200694    0.739039    0.540875    11.00000   -1.20000
AFIX   0
C38   1    1.182792    0.890507    0.639418    11.00000    0.22935
AFIX 137
H38A  2    1.126898    0.922852    0.677969    11.00000   -1.50000
H38B  2    1.121875    0.862406    0.581665    11.00000   -1.50000
H38C  2    1.262800    0.928416    0.644176    11.00000   -1.50000
AFIX   0

PART 2
O16   4    1.190682    0.817316    0.355207    10.50000    0.25300
PART 0
PART 1
O20   4    1.065624    0.832371    0.443138    10.50000    0.23664
PART 0
N10   3    1.015106    0.700221    0.342481    11.00000    0.11513
C39   1    1.015213    0.637711    0.262854    11.00000    0.14326
AFIX 137
H39A  2    0.916724    0.615511    0.227876    11.00000   -1.50000
H39B  2    1.060430    0.592309    0.267359    11.00000   -1.50000
H39C  2    1.068561    0.661247    0.237194    11.00000   -1.50000
AFIX   0
C40   1    1.080481    0.775851    0.372938    11.00000    0.14510
PART 2
AFIX  43
H40A  2    1.048646    0.814797    0.418949    10.50000   -1.20000
AFIX  43
PART 0
PART 1
H40   2    1.137995    0.789082    0.343958    10.50000   -1.20000
AFIX   0
PART 0
C41   1    0.923901    0.681916    0.387207    11.00000    0.23563
AFIX 137
H41A  2    0.824498    0.665507    0.353311    11.00000   -1.50000
H41B  2    0.931930    0.732068    0.441159    11.00000   -1.50000
H41C  2    0.954245    0.635923    0.397079    11.00000   -1.50000
AFIX   0

O17   4    1.355117    0.445353    0.375747    11.00000    0.10235
N11   3    1.324072    0.393594    0.235553    11.00000    0.07576
C42   1    1.278613    0.427518    0.305316    11.00000    0.12589
AFIX  43
H42   2    1.183279    0.438481    0.300750    11.00000   -1.20000
AFIX   0
C43   1    1.460967    0.369510    0.254299    11.00000    0.18810
AFIX 137
H43A  2    1.493667    0.389006    0.314733    11.00000   -1.50000
H43B  2    1.529991    0.394907    0.237579    11.00000   -1.50000
H43C  2    1.452432    0.308224    0.223345    11.00000   -1.50000
AFIX   0
C44   1    1.261268    0.357929    0.151400    11.00000    0.18013
AFIX 137
H44A  2    1.208328    0.302161    0.131459    11.00000   -1.50000
H44B  2    1.334922    0.352651    0.121517    11.00000   -1.50000
H44C  2    1.195464    0.393373    0.140810    11.00000   -1.50000
AFIX   0

PART -1
O18   4    0.771023    0.485028    0.394500    10.50000    0.07766
N12   3    0.988126    0.509167    0.488199    10.50000    0.08792
C45   1    1.072187    0.506275    0.430384    10.50000    0.10696
AFIX 137
H45A  2    1.129080    0.460885    0.419908    10.50000   -1.50000
H45B  2    1.135842    0.559954    0.455504    10.50000   -1.50000
H45C  2    1.007661    0.496060    0.377210    10.50000   -1.50000
AFIX   0
C46   1    0.843975    0.496328    0.461117    10.50000    0.07418
AFIX  43
H46   2    0.793760    0.496197    0.499513    10.50000   -1.20000
AFIX   0
C47   1    1.068981    0.528748    0.573428    10.50000    0.12639
AFIX 137
H47A  2    1.089652    0.476630    0.573751    10.50000   -1.50000
H47B  2    1.012216    0.556595    0.613140    10.50000   -1.50000
H47C  2    1.158756    0.566019    0.589977    10.50000   -1.50000
AFIX   0
HKLF 4


REM  tgs125_a.res in P-1
REM R1 =  0.0577 for    9205 Fo > 4sig(Fo)  and  0.0661 for all   10769 data
REM    601 parameters refined using     51 restraints

END

WGHT      0.1064      8.1107

REM Highest difference peak  1.976,  deepest hole -1.151,  1-sigma level  0.124
Q1    1   1.2223  0.4581  0.2359  11.00000  0.05    1.98
Q2    1   0.6859  0.8300  0.6891  11.00000  0.05    1.72
Q3    1   1.4394  0.4339  0.3662  11.00000  0.05    1.45
Q4    1   1.3883  0.3888  0.2900  11.00000  0.05    1.38
Q5    1   0.5324  0.7282  0.5805  11.00000  0.05    1.31
Q6    1   1.3419  0.3345  0.1471  11.00000  0.05    1.10
Q7    1   0.6755  0.6208  0.4489  11.00000  0.05    1.02
Q8    1   0.8939  0.7106  0.3825  11.00000  0.05    0.97
Q9    1   1.4120  1.1419  0.3489  11.00000  0.05    0.97
Q10   1   0.4644  0.6276  0.3601  11.00000  0.05    0.96
Q11   1   0.4996  0.7964  0.5900  11.00000  0.05    0.95
Q12   1   1.2992  0.4638  0.3831  11.00000  0.05    0.94
Q13   1   1.3848  0.8563  0.3371  11.00000  0.05    0.92
Q14   1   0.6881  0.6113  0.3763  11.00000  0.05    0.92
Q15   1   1.1446  0.7674  0.6398  11.00000  0.05    0.90
Q16   1   0.5857  0.6079  0.3242  11.00000  0.05    0.87
Q17   1   0.3285  0.6154  0.1951  11.00000  0.05    0.87
Q18   1   1.1823  0.6895  0.5689  11.00000  0.05    0.76
Q19   1   0.7292  0.4598  0.3968  11.00000  0.05    0.68
Q20   1   0.9845  0.6336  0.3715  11.00000  0.05    0.66
;
_shelx_res_checksum                80679
_shelx_hkl_file
;
  -1   0   0  372.86    9.30
  -1   0   0  372.86    8.60
  -1   0   0  380.36    8.50
   1   0   0  366.36    9.20
  -2   0   0  103.59    2.60
  -2   0   0  103.29    3.20
  -2   0   0  101.79    2.60
   2   0   0  101.49    3.20
  -3   0   0   16.80    1.10
  -3   0   0   16.60    1.70
  -3   0   0   20.30    1.00
   3   0   0   18.50    1.80
  -4   0   0   34.70    1.40
  -4   0   0   34.00    1.50
   4   0   0   33.40    2.30
  -5   0   0   19.10    1.50
  -5   0   0   18.70    1.30
   5   0   0   15.10    1.80
  -6   0   0 1329.77   30.60
  -6   0   0 1308.57   30.60
   6   0   0 1326.87   33.50
  -7   0   0   31.40    2.20
  -7   0   0   29.10    2.00
   7   0   0   30.30    2.90
  -8   0   0   79.79    3.30
  -8   0   0   81.29    3.20
   8   0   0   86.39    4.20
   8   0   0   85.59    5.20
  -9   0   0   22.40    1.90
  -9   0   0   23.00    1.90
   9   0   0   21.90    2.50
   9   0   0   18.00    3.10
 -10   0   0    1.10    1.70
  10   0   0    2.90    2.70
  10   0   0    4.10    2.10
 -11   0   0    1.20    1.80
  11   0   0    4.10    3.10
  11  -1   0   12.10    3.50
  11  -1   0   16.90    3.00
 -11   1   0   15.80    2.20
  10  -1   0    0.90    2.70
  10  -1   0    1.90    2.10
 -10   1   0   -0.30    1.80
   9  -1   0   24.60    3.20
   9  -1   0   26.10    2.80
  -9   1   0   25.50    2.00
  -9   1   0   24.80    2.30
   8  -1   0    1.40    2.10
  -8   1   0   -4.20    1.30
  -8   1   0   -2.30    1.20
   7  -1   0  639.34   17.30
  -7   1   0  631.04   15.20
  -7   1   0  635.04   15.20
   6  -1   0   35.50    3.00
  -6   1   0   35.50    1.80
  -6   1   0   32.70    1.90
   5  -1   0  165.18    5.50
  -5   1   0  165.28    4.50
  -5   1   0  174.08    4.50
   4  -1   0  779.12   19.90
  -4   1   0  780.42   18.20
  -4   1   0  793.12   18.20
   3  -1   0  241.88    6.60
  -3   1   0  235.58    5.80
  -3   1   0  238.98    5.80
  -3   1   0  237.88    6.60
   2  -1   0 1131.79   25.20
   2  -1   0 1120.99   25.20
   2  -1   0 1089.29   27.00
  -2   1   0 1100.59   25.20
  -2   1   0 1080.49   25.20
  -2   1   0 1094.29   27.00
   1  -1   0 8313.97  212.78
   1  -1   0 8337.17  189.58
  -1   1   0 8265.07  213.58
  -1   1   0 8257.47  189.68
  -1   1   0 8381.96  189.58
  -1  -1   0 2073.09   45.80
  -1  -1   0 1949.51   45.50
  -1  -1   0 1957.30   45.80
   1   1   0 1956.70   45.60
   1   1   0 1918.31   45.60
   1   1   0 2017.60   45.40
  -2  -1   0   35.50    1.30
  -2  -1   0   34.20    1.40
   2   1   0   38.50    1.60
  -3  -1   0    6.70    0.70
  -3  -1   0    6.20    0.70
   3   1   0    4.10    1.10
   3   1   0    6.10    0.90
  -4  -1   0    1.30    0.80
  -4  -1   0    1.60    0.60
   4   1   0   -1.00    1.10
   4   1   0    1.70    0.90
  -5  -1   0 1170.58   28.30
  -5  -1   0 1234.88   28.20
   5   1   0 1258.67   28.60
   5   1   0 1214.28   30.80
  -6  -1   0  128.59    3.80
  -6  -1   0  128.69    3.90
   6   1   0  119.09    5.20
   6   1   0  130.89    4.40
  -7  -1   0   63.09    2.70
  -7  -1   0   60.09    2.70
   7   1   0   54.59    4.30
   7   1   0   62.59    3.30
  -8  -1   0   44.70    2.70
  -8  -1   0   44.50    2.70
   8   1   0   40.60    3.30
   8   1   0   38.20    3.50
  -9  -1   0   54.59    3.20
  -9  -1   0   64.99    3.30
   9   1   0   62.69    3.80
   9   1   0   66.89    5.40
 -10  -1   0   19.00    2.00
  10   1   0   14.80    3.20
  10   1   0   17.70    2.40
  11   1   0   35.20    4.40
  11  -2   0   22.90    3.70
  11  -2   0   23.30    3.10
 -11   2   0   20.80    2.50
  10  -2   0  142.49    7.20
 -10   2   0  143.09    5.20
   9  -2   0    5.70    2.50
  -9   2   0    8.20    1.80
  -9   2   0    7.30    1.40
   8  -2   0  531.15   15.00
  -8   2   0  514.75   12.80
  -8   2   0  508.05   12.70
   7  -2   0   11.60    2.00
  -7   2   0   10.10    1.20
  -7   2   0    8.00    1.40
   6  -2   0  412.26   11.50
  -6   2   0  412.26   10.10
  -6   2   0  409.46   10.10
   5  -2   0  991.60   24.90
  -5   2   0  980.20   22.90
  -5   2   0  967.00   22.90
  -5   2   0  992.10   24.90
   4  -2   0  177.28    5.30
  -4   2   0  172.48    4.60
  -4   2   0  175.28    4.60
  -4   2   0  168.18    5.20
   3  -2   0  614.54   15.10
   3  -2   0  601.74   13.90
  -3   2   0  581.14   15.00
  -3   2   0  589.64   14.00
  -3   2   0  600.14   14.00
   2  -2   0 7978.70  181.88
   2  -2   0 8158.68  181.98
   2  -2   0 7955.90  194.28
  -2   2   0 7868.71  193.98
  -2   2   0 7882.01  182.08
  -2   2   0 7945.90  181.98
   1  -2   0  121.49    3.60
   1  -2   0  144.89    3.60
   1  -2   0  146.99    3.60
  -1   2   0  151.08    3.60
  -1   2   0  148.69    3.70
  -1   2   0  141.59    3.60
   0  -2   0 2380.36   55.99
   0  -2   0 2471.55   55.89
   0  -2   0 2402.46   55.69
   0   2   0 2484.05   55.59
   0   2   0 2357.76   55.79
   0   2   0 2411.06   56.49
  -1  -2   0 1767.42   39.80
  -1  -2   0 1736.53   39.20
  -1  -2   0 1684.03   39.20
   1   2   0 1677.73   39.20
   1   2   0 1662.83   39.10
  -2  -2   0  270.67    6.50
  -2  -2   0  260.37    6.40
  -2  -2   0  269.57    6.40
   2   2   0  258.47    6.40
   2   2   0  265.07    7.20
   2   2   0  259.77    6.40
  -3  -2   0  297.77    7.30
  -3  -2   0  299.17    7.40
   3   2   0  296.47    7.40
   3   2   0  306.87    7.20
   3   2   0  309.97    8.40
  -4  -2   0    2.40    0.80
  -4  -2   0    3.30    0.80
   4   2   0    3.60    1.00
   4   2   0    2.10    1.30
  -5  -2   0  623.74   15.30
  -5  -2   0  658.33   15.30
   5   2   0  642.94   17.10
   5   2   0  643.94   15.50
  -6  -2   0   82.19    3.20
  -6  -2   0   82.39    3.00
   6   2   0   85.19    3.40
   6   2   0   77.69    4.30
  -7  -2   0   15.70    1.60
  -7  -2   0   15.80    1.60
   7   2   0   19.00    1.90
   7   2   0   15.40    2.60
  -8  -2   0  118.39    4.20
  -8  -2   0  121.79    4.30
   8   2   0  125.99    6.30
   8   2   0  124.19    4.70
  -9  -2   0    3.30    1.60
   9   2   0    2.80    2.60
   9   2   0    4.90    1.80
 -10  -2   0    9.00    1.80
  10   2   0    6.50    2.00
  10   2   0    7.90    3.10
 -11  -2   0   21.40    2.30
  11   2   0   17.20    3.80
  11  -3   0    9.70    3.10
 -11   3   0    5.60    2.20
  10  -3   0   17.30    3.10
 -10   3   0   16.00    2.30
   9  -3   0  293.87   10.00
  -9   3   0  302.57    8.20
  -9   3   0  277.47    7.80
   8  -3   0   59.59    4.40
  -8   3   0   61.99    3.00
  -8   3   0   60.59    3.40
   7  -3   0  225.58    7.60
  -7   3   0  229.78    6.40
  -7   3   0  226.68    6.30
   6  -3   0 1032.50   25.90
  -6   3   0 1015.90   25.80
  -6   3   0  991.00   23.80
  -6   3   0 1006.40   23.80
   5  -3   0  117.69    4.20
   5  -3   0  116.89    3.10
  -5   3   0  111.39    3.60
  -5   3   0  110.09    3.50
  -5   3   0  105.29    4.00
   4  -3   0  498.45   12.90
   4  -3   0  493.15   11.70
  -4   3   0  489.75   12.70
  -4   3   0  493.75   11.90
  -4   3   0  493.25   11.90
   3  -3   0 1929.21   47.00
   3  -3   0 1900.01   43.60
  -3   3   0 1883.41   43.70
  -3   3   0 1900.11   46.40
  -3   3   0 1897.11   43.70
   2  -3   0 2064.19   54.59
   2  -3   0 2246.08   50.79
  -2   3   0 2184.58   50.79
  -2   3   0 2299.97   50.79
  -2   3   0 2303.87   54.69
   1  -3   0  320.67    7.80
   1  -3   0  313.97    7.70
  -1   3   0  314.77    7.70
  -1   3   0  310.47    7.90
  -1   3   0  325.57    7.80
   0  -3   0  121.69    3.40
   0  -3   0  124.99    3.40
   0  -3   0  116.49    3.30
   0  -3   0  119.09    3.30
   0   3   0  128.19    3.40
   0   3   0  123.39    3.30
   0   3   0  113.59    3.20
  -1  -3   0 1121.79   25.60
  -1  -3   0 1128.69   25.60
  -1  -3   0 1118.59   25.50
   1   3   0 1090.49   25.60
   1   3   0 1078.09   25.50
  -2  -3   0   10.30    0.90
  -2  -3   0   10.20    0.90
  -2  -3   0   10.50    0.90
   2   3   0   10.30    0.90
   2   3   0   10.00    0.90
  -3  -3   0  179.18    4.70
  -3  -3   0  179.08    4.60
  -3  -3   0  174.58    4.60
   3   3   0  178.48    5.50
   3   3   0  165.68    4.60
   3   3   0  172.58    4.60
  -4  -3   0 1193.78   27.30
  -4  -3   0 1145.09   27.20
   4   3   0 1194.08   26.90
   4   3   0 1160.48   29.60
   4   3   0 1159.18   27.20
  -5  -3   0   93.99    3.10
  -5  -3   0   88.89    3.00
   5   3   0   80.19    3.20
   5   3   0   87.39    4.30
  -6  -3   0  206.78    5.80
  -6  -3   0  214.68    5.90
   6   3   0  205.78    7.30
   6   3   0  200.88    5.90
  -7  -3   0   23.10    2.10
  -7  -3   0   23.00    2.00
   7   3   0   22.00    2.00
   7   3   0   19.10    2.70
  -8  -3   0    3.10    1.30
  -8  -3   0    0.50    1.50
   8   3   0   -0.50    2.30
   8   3   0    3.20    1.50
  -9  -3   0   54.99    3.50
   9   3   0   59.09    5.60
   9   3   0   56.39    3.60
 -10  -3   0   29.20    2.50
  10   3   0   26.80    4.00
 -11  -3   0  117.39    5.10
  11   3   0  118.29    7.70
  11  -4   0   18.50    3.50
 -11   4   0    9.70    2.40
  10  -4   0  385.96   12.70
 -10   4   0  385.36   10.60
   9  -4   0   -3.30    2.00
  -9   4   0    1.50    1.80
   8  -4   0  351.66   11.00
  -8   4   0  353.46    9.50
  -8   4   0  363.86    9.40
   7  -4   0  159.18    5.90
  -7   4   0  154.28    4.90
  -7   4   0  151.38    5.00
   6  -4   0  104.39    4.30
  -6   4   0  100.09    3.80
  -6   4   0   96.59    3.60
  -6   4   0  104.69    4.10
   5  -4   0  502.55   11.90
   5  -4   0  488.35   13.30
  -5   4   0  503.55   12.30
  -5   4   0  496.55   12.20
   4  -4   0  323.97    7.90
   4  -4   0  303.17    8.60
  -4   4   0  315.27    8.40
  -4   4   0  316.27    8.10
  -4   4   0  319.47    8.00
   3  -4   0  679.93   17.50
   3  -4   0  704.33   16.50
  -3   4   0  675.23   16.60
  -3   4   0  713.23   17.40
  -3   4   0  719.33   16.60
   2  -4   0  318.87    7.90
   2  -4   0  311.57    7.90
   2  -4   0  313.77    7.80
  -2   4   0  313.77    7.80
  -2   4   0  304.77    8.00
  -2   4   0  308.27    7.80
   1  -4   0 1883.61   43.40
   1  -4   0 1913.61   43.40
  -1   4   0 2011.60   43.50
  -1   4   0 1877.81   43.40
  -1   4   0 1785.72   43.40
  -1   4   0 1863.81   45.90
   0  -4   0  585.94   15.10
   0  -4   0  614.14   14.30
   0  -4   0  594.54   14.20
   0  -4   0  591.74   14.20
   0   4   0  579.44   14.10
   0   4   0  631.44   14.30
   0   4   0  581.84   14.20
  -1  -4   0  323.17    8.10
  -1  -4   0  327.47    8.10
  -1  -4   0  333.17    8.10
   1   4   0  320.47    8.10
   1   4   0  319.87    8.00
  -2  -4   0  265.17    6.60
  -2  -4   0  260.17    6.60
  -2  -4   0  253.77    6.50
   2   4   0  252.77    6.70
   2   4   0  262.67    6.50
   2   4   0  246.28    6.40
  -3  -4   0 1291.87   29.30
  -3  -4   0 1276.47   29.20
  -3  -4   0 1260.97   29.20
   3   4   0 1261.77   29.20
   3   4   0 1229.98   29.10
   3   4   0 1225.48   31.50
  -4  -4   0  224.68    6.20
  -4  -4   0  241.88    6.20
  -4  -4   0  232.38    6.20
   4   4   0  235.98    5.90
   4   4   0  218.08    7.20
   4   4   0  224.48    6.10
  -5  -4   0  342.27    8.80
  -5  -4   0  351.36    8.80
   5   4   0  332.37    8.80
   5   4   0  350.46   10.30
  -6  -4   0   98.19    3.50
  -6  -4   0  101.89    3.80
   6   4   0   89.79    5.10
   6   4   0   98.89    3.60
  -7  -4   0   59.99    2.90
  -7  -4   0   58.59    3.40
   7   4   0   62.39    3.10
   7   4   0   53.29    4.80
  -8  -4   0   11.90    1.70
  -8  -4   0    9.20    1.90
   8   4   0   12.40    1.80
   8   4   0   12.30    2.90
  -9  -4   0    2.50    1.90
   9   4   0    5.20    1.80
   9   4   0    2.80    2.80
 -10  -4   0  119.99    5.20
  10   4   0  124.59    7.70
  11  -5   0  241.38   10.10
 -11   5   0  252.17    8.10
  10  -5   0   23.10    3.40
 -10   5   0   27.00    2.70
   9  -5   0   89.19    5.50
  -9   5   0   95.69    4.60
   8  -5   0  136.19    6.00
  -8   5   0  142.09    4.90
  -8   5   0  139.39    5.20
   7  -5   0  101.49    4.80
  -7   5   0  108.89    4.00
  -7   5   0  106.19    4.30
   6  -5   0  266.97    8.10
   6  -5   0  266.07    6.80
  -6   5   0  265.37    7.80
  -6   5   0  271.87    7.30
  -6   5   0  257.07    7.30
   5  -5   0  659.23   15.40
   5  -5   0  613.64   16.80
  -5   5   0  640.64   15.70
  -5   5   0  664.73   15.70
   4  -5   0 2105.69   51.99
   4  -5   0 2141.19   48.90
  -4   5   0 2130.79   51.79
  -4   5   0 2167.38   49.00
  -4   5   0 2063.59   49.00
   3  -5   0   49.60    2.30
   3  -5   0   52.79    2.50
   3  -5   0   53.79    2.00
  -3   5   0   46.80    2.50
  -3   5   0   48.80    2.50
  -3   5   0   48.10    2.00
   2  -5   0 1097.99   25.80
  -2   5   0 1134.19   25.80
  -2   5   0 1104.79   27.00
  -2   5   0 1069.99   25.80
   1  -5   0    2.40    1.00
  -1   5   0    4.60    1.10
   0  -5   0    0.30    0.70
   0  -5   0    0.80    0.90
   0  -5   0    0.70    1.00
   0  -5   0    1.30    0.90
   0   5   0    0.80    0.90
   0   5   0    0.00    0.90
  -1  -5   0    6.30    1.10
  -1  -5   0    6.50    1.00
  -1  -5   0    7.40    1.10
   1   5   0    6.60    1.00
   1   5   0    7.60    1.00
  -2  -5   0  538.05   13.10
  -2  -5   0  549.54   13.20
  -2  -5   0  549.85   13.20
   2   5   0  534.45   13.00
   2   5   0  542.55   13.10
  -3  -5   0  161.28    4.90
  -3  -5   0  171.68    4.90
  -3  -5   0  172.98    4.80
   3   5   0  169.58    4.70
   3   5   0  169.78    4.80
   3   5   0  166.38    5.70
   3   5   0  166.78    4.70
  -4  -5   0 1026.60   23.90
  -4  -5   0 1019.30   23.90
   4   5   0 1013.40   25.80
   4   5   0 1018.40   23.80
   4   5   0 1008.80   26.00
   4   5   0  982.70   23.70
  -5  -5   0   42.40    2.50
  -5  -5   0   37.40    2.30
   5   5   0   38.70    2.30
   5   5   0   36.30    1.90
   5   5   0   38.20    3.10
  -6  -5   0  187.78    5.70
  -6  -5   0  186.08    5.60
   6   5   0  189.68    5.60
   6   5   0  185.78    7.20
  -7  -5   0    5.00    1.40
  -7  -5   0    5.60    1.80
   7   5   0    6.10    1.50
   7   5   0    4.70    2.50
  -8  -5   0   19.60    2.40
   8   5   0   22.00    2.20
   8   5   0   21.60    3.40
  -9  -5   0  263.77    8.10
   9   5   0  259.47    7.80
   9   5   0  263.07   10.40
 -10  -5   0   -2.50    2.00
  10   5   0    4.00    3.30
  11  -6   0    2.50    3.00
 -11   6   0    2.60    2.40
  10  -6   0  291.47   10.50
 -10   6   0  293.97    9.00
   9  -6   0    3.20    2.40
  -9   6   0    3.50    2.10
   8  -6   0   46.70    4.10
  -8   6   0   47.80    3.40
  -8   6   0   49.50    3.80
   7  -6   0  110.89    5.10
  -7   6   0  120.59    4.60
  -7   6   0  119.29    4.80
  -7   6   0  117.39    4.50
   6  -6   0   93.29    4.20
   6  -6   0  102.39    3.60
  -6   6   0  104.89    3.90
  -6   6   0   94.39    4.10
  -6   6   0  104.29    4.00
   5  -6   0 1373.36   34.30
   5  -6   0 1399.16   32.70
   5  -6   0 1393.26   32.20
  -5   6   0 1346.47   32.40
  -5   6   0 1399.36   32.40
  -5   6   0 1356.96   34.10
   4  -6   0  173.58    5.20
   4  -6   0  165.88    5.50
   4  -6   0  165.38    5.20
  -4   6   0  202.98    5.60
  -4   6   0  169.48    5.10
  -4   6   0  205.18    5.50
   3  -6   0 2333.47   53.79
   3  -6   0 2394.46   53.99
   3  -6   0 2200.58   56.59
  -3   6   0 2276.47   53.89
  -3   6   0 2428.96   53.89
  -3   6   0 2360.76   56.79
   2  -6   0  229.98    6.40
  -2   6   0  237.98    6.20
  -2   6   0  240.18    6.50
  -2   6   0  224.88    6.40
   1  -6   0  449.06   11.10
  -1   6   0  448.26   11.20
  -1   6   0  436.06   11.10
   0  -6   0  134.79    3.80
   0  -6   0  119.19    4.00
   0  -6   0  137.59    4.20
   0   6   0  133.59    4.10
   0   6   0  138.49    4.20
  -1  -6   0  116.29    3.80
  -1  -6   0  113.99    3.90
  -1  -6   0  116.89    3.70
   1   6   0  111.59    3.70
   1   6   0  115.29    3.70
  -2  -6   0  610.64   14.60
  -2  -6   0  607.34   14.50
  -2  -6   0  590.34   14.60
   2   6   0  585.24   14.50
   2   6   0  582.64   14.30
  -3  -6   0  463.25   11.30
  -3  -6   0  450.35   11.30
  -3  -6   0  401.56   11.00
   3   6   0  455.25   12.40
   3   6   0  457.85   11.20
   3   6   0  459.25   11.10
   3   6   0  440.36   11.50
  -4  -6   0   91.99    3.70
  -4  -6   0   96.49    3.50
   4   6   0   96.29    3.50
   4   6   0   97.59    3.40
   4   6   0   98.79    3.20
   4   6   0   90.09    4.60
  -5  -6   0  110.19    4.00
  -5  -6   0  108.89    3.80
  -5  -6   0   85.59    3.50
   5   6   0  106.49    3.70
   5   6   0  103.39    3.70
   5   6   0   97.59    3.40
   5   6   0  103.09    5.10
  -6  -6   0   58.79    3.40
  -6  -6   0   60.09    3.10
   6   6   0   57.39    3.10
   6   6   0   53.99    4.60
   6   6   0   51.39    2.90
  -7  -6   0  290.97    8.40
  -7  -6   0  284.87    8.40
   7   6   0  280.77    8.00
   7   6   0  294.97    8.90
   7   6   0  287.27   10.20
  -8  -6   0  238.88    7.60
   8   6   0  237.98    7.10
   8   6   0  235.58    9.50
  -9  -6   0   28.20    2.90
   9   6   0   35.40    4.40
 -10  -6   0  100.59    5.30
  10   6   0  108.59    7.90
  11  -7   0  184.18    8.60
 -11   7   0  201.58    7.40
  10  -7   0    6.80    2.70
 -10   7   0    5.70    2.40
   9  -7   0    8.60    2.50
  -9   7   0    9.20    2.40
   8  -7   0   82.09    4.60
  -8   7   0   73.69    4.40
   7  -7   0   55.99    3.60
   7  -7   0   53.99    2.90
  -7   7   0   53.99    3.20
  -7   7   0   51.69    3.80
  -7   7   0   54.49    3.40
   6  -7   0  472.45   11.80
   6  -7   0  485.35   12.70
  -6   7   0  472.95   12.20
  -6   7   0  439.86   12.10
   5  -7   0  276.17    7.60
   5  -7   0  285.37    8.10
   5  -7   0  272.67    7.80
  -5   7   0  292.27    7.70
  -5   7   0  261.77    7.90
  -5   7   0  288.57    7.90
   4  -7   0  332.77    9.00
   4  -7   0  315.57    8.50
   4  -7   0  318.27    8.60
  -4   7   0  315.17    8.80
  -4   7   0  340.07    8.80
  -4   7   0  326.37    8.60
   3  -7   0    0.60    1.20
   3  -7   0   -0.50    1.20
  -3   7   0    0.40    0.80
  -3   7   0    1.10    1.30
  -3   7   0   -0.20    1.20
   2  -7   0  248.08    7.00
   2  -7   0  263.57    7.10
  -2   7   0  254.07    6.70
  -2   7   0  244.08    7.10
   1  -7   0   73.99    3.10
   1  -7   0   68.79    3.20
  -1   7   0   72.79    3.20
  -1   7   0   70.49    3.00
   0  -7   0    3.50    1.10
   0  -7   0    5.40    0.90
   0  -7   0    5.20    1.30
   0   7   0    4.80    1.20
   0   7   0    4.40    1.30
  -1  -7   0 1591.74   37.00
   1   7   0 1594.44   37.00
   1   7   0 1566.34   36.80
  -2  -7   0    1.30    1.00
  -2  -7   0   -0.10    1.30
  -2  -7   0    0.00    0.50
   2   7   0    2.10    1.10
   2   7   0    2.10    1.10
  -3  -7   0  629.24   15.60
  -3  -7   0  651.13   15.60
   3   7   0  630.04   15.40
   3   7   0  605.14   16.90
   3   7   0  641.34   15.50
  -4  -7   0  360.36    9.80
  -4  -7   0  394.66   10.10
  -4  -7   0  390.16   10.00
   4   7   0  380.46   11.30
   4   7   0  389.36    9.90
   4   7   0  377.76   10.10
   4   7   0  377.56    9.80
  -5  -7   0   25.10    2.30
  -5  -7   0   21.90    1.90
  -5  -7   0   23.20    2.10
   5   7   0   22.70    1.80
   5   7   0   15.40    2.50
   5   7   0   20.00    1.80
   5   7   0   21.00    1.80
  -6  -7   0  563.94   14.10
  -6  -7   0  539.05   14.10
   6   7   0  550.14   14.90
   6   7   0  555.34   16.10
   6   7   0  558.74   13.90
  -7  -7   0  405.06   11.20
   7   7   0  419.06   13.20
   7   7   0  411.96   11.70
   7   7   0  410.16   10.80
  -8  -7   0   24.40    2.70
   8   7   0   22.90    2.30
   8   7   0   24.30    3.60
  -9  -7   0  240.28    8.20
   9   7   0  240.18   10.30
 -10  -7   0   60.99    5.00
  10   7   0   55.49    5.60
 -11   8   0    6.30    2.90
  10  -8   0    3.20    2.50
 -10   8   0    0.20    2.50
   9  -8   0   28.50    3.10
  -9   8   0   30.50    3.10
   8  -8   0   20.20    2.40
  -8   8   0   15.40    2.60
   7  -8   0  240.08    7.30
   7  -8   0  221.88    6.80
  -7   8   0  227.38    7.00
  -7   8   0  221.98    7.40
  -7   8   0  225.18    7.20
   6  -8   0  204.38    6.00
   6  -8   0  190.38    6.00
  -6   8   0  176.18    6.40
  -6   8   0  200.28    6.40
   5  -8   0  131.89    4.80
   5  -8   0  127.29    4.30
  -5   8   0  145.79    5.10
  -5   8   0  129.99    5.10
  -5   8   0  144.09    4.30
   4  -8   0   -1.20    1.30
   4  -8   0    0.70    1.40
   4  -8   0    1.10    0.90
  -4   8   0    1.00    1.40
  -4   8   0    2.20    0.90
   3  -8   0    4.40    1.40
  -3   8   0    4.00    1.40
  -3   8   0    7.50    1.00
   2  -8   0    2.40    1.40
   2  -8   0    4.30    1.40
  -2   8   0    6.30    0.90
  -2   8   0    4.40    1.50
   1  -8   0  119.69    4.10
   1  -8   0  115.29    4.40
   1  -8   0  125.29    4.30
  -1   8   0  112.29    4.30
  -1   8   0  115.39    4.20
   0  -8   0  748.63   18.20
   0  -8   0  731.03   18.90
   0  -8   0  762.62   18.10
   0   8   0  718.83   18.10
   0   8   0  753.92   18.10
  -1  -8   0   -1.10    1.40
  -1  -8   0    1.90    1.20
   1   8   0    0.50    1.30
   1   8   0    2.10    1.20
  -2  -8   0 1676.33   39.40
  -2  -8   0 1706.13   39.30
   2   8   0 1659.73   39.30
   2   8   0 1674.53   39.10
  -3  -8   0 1070.19   25.70
  -3  -8   0 1100.99   25.70
  -3  -8   0 1103.29   25.50
   3   8   0 1043.30   25.30
   3   8   0 1042.50   27.50
   3   8   0 1049.59   25.50
  -4  -8   0  164.98    5.50
  -4  -8   0  169.98    5.70
  -4  -8   0  173.68    5.40
   4   8   0  170.68    5.30
   4   8   0  169.88    5.40
   4   8   0  167.18    6.60
  -5  -8   0  429.26   11.50
  -5  -8   0  451.45   11.80
  -5  -8   0  452.15   11.70
   5   8   0  441.76   11.40
   5   8   0  447.46   13.30
   5   8   0  430.46   11.70
   5   8   0  442.46   11.40
  -6  -8   0  317.47    9.10
   6   8   0  311.17   10.70
   6   8   0  307.37    8.60
   6   8   0  316.87    8.90
  -7  -8   0    0.00    1.90
   7   8   0    1.70    2.70
   7   8   0    1.10    1.60
  -8  -8   0  434.46   12.20
   8   8   0  423.46   11.60
   8   8   0  458.05   14.60
  -9  -8   0   36.00    3.50
   9   8   0   39.60    4.80
 -11   9   0    4.60    3.00
  10  -9   0    2.90    2.50
 -10   9   0    0.00    2.60
   9  -9   0   10.00    2.30
  -9   9   0   10.30    2.80
   8  -9   0  112.89    4.90
  -8   9   0   97.49    5.40
   7  -9   0   94.59    4.00
  -7   9   0   81.49    4.90
  -7   9   0   83.59    3.80
   6  -9   0  171.88    5.80
   6  -9   0  175.28    5.40
  -6   9   0  174.28    6.10
  -6   9   0  161.18    6.20
   5  -9   0   50.19    3.50
   5  -9   0   53.59    2.60
  -5   9   0   58.09    2.50
  -5   9   0   49.60    3.80
   4  -9   0  151.78    5.40
  -4   9   0  150.58    5.60
  -4   9   0  160.78    4.70
   3  -9   0   34.60    3.10
   3  -9   0   30.40    2.70
  -3   9   0   37.30    1.90
  -3   9   0   26.50    2.30
   2  -9   0   39.30    3.30
   2  -9   0   48.30    3.00
  -2   9   0   46.80    2.20
  -2   9   0   43.00    3.30
   1  -9   0 1160.08   27.60
   1  -9   0 1174.08   29.50
   1  -9   0 1193.58   27.70
  -1   9   0 1123.09   27.60
  -1   9   0 1116.69   27.50
   0  -9   0    8.00    1.60
   0  -9   0    4.40    1.60
   0  -9   0    7.20    1.00
   0   9   0    8.30    1.60
   0   9   0    5.30    1.40
  -1  -9   0 2199.98   49.80
  -1  -9   0 2149.39   49.90
   1   9   0 2091.69   49.60
   1   9   0 2099.09   49.80
  -2  -9   0  428.06   11.50
  -2  -9   0  439.06   11.20
   2   9   0  424.56   11.20
   2   9   0  423.16   11.10
  -3  -9   0   77.69    3.40
  -3  -9   0   65.89    3.90
   3   9   0   73.69    3.50
   3   9   0   69.89    4.30
   3   9   0   70.59    3.40
  -4  -9   0  403.26   11.00
  -4  -9   0  407.96   10.90
  -4  -9   0  403.66   10.70
   4   9   0  403.46   12.20
   4   9   0  401.26   10.70
   4   9   0  397.36   10.60
  -5  -9   0   17.00    2.00
   5   9   0   14.70    2.80
   5   9   0   15.90    1.90
   5   9   0   15.00    1.90
  -6  -9   0    4.30    1.60
  -6  -9   0    6.00    2.10
   6   9   0    5.30    2.80
   6   9   0    4.80    1.30
   6   9   0    3.10    1.60
  -7  -9   0  480.95   13.30
   7   9   0  500.65   15.40
   7   9   0  481.25   13.40
   7   9   0  490.95   12.70
  -8  -9   0   14.00    2.70
   8   9   0   13.00    3.60
  -9  -9   0   18.30    3.00
   9   9   0   16.80    4.20
 -10  10   0   68.49    5.90
   9 -10   0   44.50    3.80
  -9  10   0   35.70    3.50
   8 -10   0    6.70    1.90
  -8  10   0    4.50    2.50
   7 -10   0  114.89    4.40
  -7  10   0  115.19    4.30
  -7  10   0  117.29    5.60
   6 -10   0  188.18    5.70
   6 -10   0  190.18    6.40
  -6  10   0  184.68    5.60
  -6  10   0  180.38    6.80
   5 -10   0   29.10    2.50
  -5  10   0   30.80    2.70
   4 -10   0   82.79    4.30
  -4  10   0   96.39    3.30
  -4  10   0   88.39    4.60
   3 -10   0  207.48    6.80
  -3  10   0  214.18    5.90
  -3  10   0  199.28    6.80
   2 -10   0  987.50   27.00
   2 -10   0 1048.90   25.30
   2 -10   0 1076.09   25.40
  -2  10   0 1024.60   25.30
  -2  10   0 1061.99   25.90
   1 -10   0  279.07    8.10
   1 -10   0  281.97    8.30
   1 -10   0  291.37    8.30
  -1  10   0  274.57    8.10
  -1  10   0  276.17    8.30
   0 -10   0 1219.88   28.80
   0 -10   0 1147.19   30.20
   0 -10   0 1218.08   28.70
   0  10   0 1178.68   28.70
   0  10   0 1205.08   28.60
  -1 -10   0  353.86    9.50
  -1 -10   0  338.97    9.70
   1  10   0  344.07    9.50
   1  10   0  324.27    9.30
  -2 -10   0  400.36   11.10
  -2 -10   0  419.16   10.90
   2  10   0  394.86   10.80
   2  10   0  400.16   10.70
  -3 -10   0  574.54   14.70
  -3 -10   0  569.84   15.00
   3  10   0  578.64   16.10
   3  10   0  588.14   14.80
   3  10   0  565.84   14.50
  -4 -10   0  185.98    6.10
  -4 -10   0  187.98    6.50
   4  10   0  181.68    6.10
   4  10   0  184.58    7.40
   4  10   0  181.38    5.90
  -5 -10   0   41.60    3.10
   5  10   0   38.10    3.70
   5  10   0   43.60    3.20
  -6 -10   0  320.37    9.80
   6  10   0  324.37    9.20
   6  10   0  330.57   11.40
  -7 -10   0    7.00    2.40
   7  10   0    5.90    1.90
   7  10   0   -2.30    2.90
  -8 -10   0   20.80    3.00
   8  10   0   16.50    3.90
 -10  11   0    6.00    3.10
  -9  11   0    9.10    3.00
   8 -11   0   81.49    4.10
  -8  11   0   87.19    5.70
   7 -11   0  212.28    6.50
  -7  11   0  217.18    7.80
   6 -11   0   10.40    2.20
  -6  11   0    8.30    2.50
  -6  11   0   14.20    1.50
   5 -11   0   12.30    2.30
  -5  11   0   15.20    1.40
  -5  11   0   11.50    2.40
   4 -11   0  205.48    7.10
  -4  11   0  219.08    6.10
  -4  11   0  195.98    7.20
   3 -11   0  388.16   11.10
  -3  11   0  411.06   10.50
  -3  11   0  393.06   11.20
   2 -11   0  115.19    5.10
   2 -11   0  113.99    4.70
  -2  11   0  114.19    5.20
   1 -11   0 1342.97   34.10
   1 -11   0 1398.56   32.40
   1 -11   0 1352.56   32.10
  -1  11   0 1267.07   31.90
  -1  11   0 1314.87   32.10
   0 -11   0  103.09    4.90
   0 -11   0   99.49    3.50
   0 -11   0   99.49    4.60
   0  11   0  107.19    4.80
   0  11   0   99.39    4.50
  -1 -11   0  306.67    9.40
  -1 -11   0  335.87    9.30
   1  11   0  309.87    9.00
   1  11   0  325.27    9.30
  -2 -11   0  326.57    9.10
  -2 -11   0  312.27    9.40
   2  11   0  306.27    8.90
   2  11   0  308.37    9.10
  -3 -11   0    2.40    1.70
  -3 -11   0    1.80    2.10
   3  11   0    4.00    1.70
   3  11   0    2.90    2.30
   3  11   0    0.10    1.70
  -4 -11   0   16.20    2.20
  -4 -11   0   11.00    2.40
   4  11   0   13.90    2.10
   4  11   0   11.50    2.80
   4  11   0   15.80    2.10
  -5 -11   0   73.99    4.10
   5  11   0   73.79    4.10
   5  11   0   78.69    5.70
  -6 -11   0  106.09    5.60
   6  11   0  100.19    6.80
   6  11   0  104.79    4.70
  -7 -11   0   13.20    2.80
   7  11   0   16.30    3.80
  -8 -11   0    0.90    2.60
   8  11   0   -3.90    3.30
 -10  12   0   12.60    3.50
  -9  12   0   22.30    3.50
  -8  12   0  312.37   10.40
  -7  12   0   90.49    5.90
   6 -12   0  131.89    5.70
  -6  12   0  123.69    4.10
  -6  12   0  116.69    6.20
   5 -12   0  280.27    8.90
  -5  12   0  279.97    7.60
  -5  12   0  268.37    9.10
   4 -12   0  141.99    6.10
  -4  12   0  141.29    6.30
  -4  12   0  152.68    4.70
   3 -12   0   53.19    4.20
   3 -12   0   62.89    4.60
  -3  12   0   59.99    4.60
  -3  12   0   65.89    2.80
   2 -12   0 1540.05   39.80
   2 -12   0 1554.04   37.20
  -2  12   0 1555.24   37.20
   1 -12   0    5.50    2.10
   1 -12   0    3.30    1.50
  -1  12   0    0.00    1.70
  -1  12   0    2.10    1.90
   0 -12   0  154.38    4.90
   0 -12   0  158.18    6.40
   0  12   0  161.38    6.20
   0  12   0  160.48    5.90
  -1 -12   0  133.29    5.90
   1  12   0  136.89    5.40
   1  12   0  132.39    5.60
  -2 -12   0   86.39    5.30
   2  12   0   91.09    4.80
   2  12   0   89.99    4.40
  -3 -12   0   -2.80    1.70
  -3 -12   0   -0.60    2.30
   3  12   0   -0.70    1.80
   3  12   0   -0.70    2.20
   3  12   0   -0.70    1.70
  -4 -12   0  285.07    9.40
   4  12   0  288.87   10.20
   4  12   0  293.87    8.60
  -5 -12   0   45.50    3.60
   5  12   0   40.50    4.00
   5  12   0   44.90    3.70
  -6 -12   0    1.90    2.50
   6  12   0    6.90    3.10
   6  12   0    2.60    2.00
  -7 -12   0   17.50    3.20
   7  12   0   16.90    3.90
  -9  13   0  297.77   10.60
  -8  13   0    0.80    2.90
  -7  13   0  113.99    6.70
  -6  13   0  251.27    9.10
   5 -13   0   46.20    3.50
  -5  13   0   38.80    3.70
   4 -13   0    5.50    2.50
   4 -13   0    4.80    2.60
  -4  13   0    9.70    1.40
  -4  13   0    8.60    2.70
   3 -13   0  683.03   19.00
   3 -13   0  692.03   18.10
  -3  13   0  681.23   18.10
   2 -13   0   14.80    2.30
   2 -13   0   12.10    2.60
  -2  13   0   13.70    1.70
  -2  13   0    9.60    2.40
   1 -13   0    7.50    1.80
   1 -13   0   11.80    2.60
  -1  13   0    9.70    2.50
   0 -13   0   17.20    2.80
   0 -13   0   20.30    1.70
   0  13   0   20.10    2.60
   0  13   0   19.50    2.60
  -1 -13   0  143.19    6.70
   1  13   0  154.48    6.00
   1  13   0  156.28    6.40
  -2 -13   0    3.60    2.40
   2  13   0    1.80    2.20
   2  13   0    2.50    2.00
   2  13   0    2.50    2.10
  -3 -13   0  125.39    6.40
   3  13   0  140.79    6.00
   3  13   0  133.29    5.50
   3  13   0  117.59    6.40
  -4 -13   0   36.40    3.70
   4  13   0   43.70    4.10
   4  13   0   45.90    3.80
  -5 -13   0    1.50    2.60
   5  13   0    4.90    2.10
   5  13   0    8.40    3.20
  -6 -13   0   10.30    3.00
   6  13   0   12.80    3.70
   6  13   0   10.90    2.30
  -7 -13   0  100.69    6.70
   7  13   0  109.49    8.00
  -9  14   0   10.80    3.80
  -8  14   0   96.19    7.10
  -7  14   0  206.78    8.70
  -6  14   0  111.69    6.80
   5 -14   0   80.99    5.70
   5 -14   0   78.29    5.70
  -5  14   0   74.09    6.00
   4 -14   0 1054.49   25.50
   4 -14   0  982.90   27.30
  -4  14   0 1003.30   25.60
  -4  14   0  974.70   25.20
   3 -14   0   78.99    4.90
   3 -14   0   74.59    5.50
  -3  14   0   51.09    2.80
  -3  14   0   88.29    5.70
   2 -14   0  173.98    6.40
   2 -14   0  163.78    7.20
  -2  14   0  168.98    7.20
  -2  14   0  174.68    5.80
   1 -14   0   18.00    3.00
   1 -14   0   18.30    2.10
  -1  14   0   18.70    2.90
   0 -14   0  408.66   12.00
   0 -14   0  393.36   10.70
   0  14   0  378.86   11.40
   0  14   0  396.86   11.80
  -1 -14   0   35.70    3.70
   1  14   0   40.10    3.30
   1  14   0   38.50    3.50
  -2 -14   0   56.69    4.30
   2  14   0   62.49    4.50
   2  14   0   56.69    4.10
   2  14   0   66.29    5.10
  -3 -14   0   92.79    6.10
   3  14   0   88.99    5.00
   3  14   0   93.79    6.00
   4  14   0   21.90    3.50
   4  14   0   25.80    2.80
  -5 -14   0   -0.90    2.80
   5  14   0    1.10    3.00
   5  14   0    1.40    2.00
  -6 -14   0   60.19    4.80
   6  14   0   69.49    5.60
   8 -15   0   66.99    6.10
  -8  15   0   80.79    7.20
   7 -15   0    8.50    3.90
  -7  15   0   12.40    3.60
   6 -15   0   21.60    3.90
  -6  15   0   19.70    3.70
   5 -15   0  415.26   12.30
   5 -15   0  376.66   12.90
  -5  15   0  378.86   12.50
   4 -15   0   28.90    3.50
   4 -15   0   18.80    3.30
  -4  15   0   24.70    3.60
   3 -15   0   59.59    4.40
   3 -15   0   51.49    4.70
  -3  15   0   48.20    4.10
   2 -15   0   28.50    2.90
   2 -15   0   31.30    3.70
  -2  15   0   25.70    3.50
  -2  15   0   31.70    3.00
   1 -15   0   21.00    3.40
   1 -15   0   28.00    2.30
  -1  15   0   23.40    3.30
   0 -15   0   31.30    3.80
   0 -15   0   29.00    2.60
   0  15   0   31.20    3.30
   0  15   0   35.30    3.70
  -1 -15   0   34.60    3.80
   1  15   0   46.30    4.60
   1  15   0   42.00    3.50
   1  15   0   43.60    3.90
  -2 -15   0   50.89    4.20
   2  15   0   57.69    5.40
   2  15   0   59.89    4.80
   2  15   0   64.59    5.20
  -3 -15   0   38.30    4.00
   3  15   0   40.10    3.90
   3  15   0   40.80    3.50
   4  15   0    6.50    2.40
   4  15   0    7.70    3.20
  -5 -15   0   20.10    3.80
   5  15   0   22.70    3.00
   5  15   0   25.20    4.00
   6  15   0    8.50    3.80
   8 -16   0   24.10    5.00
  -8  16   0   31.70    4.70
   7 -16   0   19.00    4.30
  -7  16   0   17.40    4.00
   6 -16   0  150.98    8.30
  -6  16   0  163.98    8.50
   5 -16   0  112.99    7.00
   5 -16   0  115.19    7.20
  -5  16   0  113.39    7.50
   4 -16   0  134.69    7.00
   4 -16   0  138.99    7.60
  -4  16   0  137.39    7.70
   3 -16   0   37.10    3.60
   3 -16   0   41.60    4.20
  -3  16   0   29.70    3.90
   2 -16   0   13.90    3.40
   2 -16   0   19.80    2.50
  -2  16   0   13.90    3.30
   1 -16   0   -5.10    3.00
   1 -16   0   -1.00    1.70
  -1  16   0   -5.60    2.80
   0 -16   0   25.60    3.90
   0  16   0   24.70    3.90
   0  16   0   24.20    2.90
  -1 -16   0  178.28    8.50
   1  16   0  182.98    8.20
   1  16   0  188.78    7.50
   1  16   0  182.78    7.60
  -2 -16   0  127.19    7.40
   2  16   0  112.49    6.60
   2  16   0  112.29    6.00
  -3 -16   0    4.20    3.30
   3  16   0    2.80    2.90
   3  16   0   -0.80    2.40
   4  16   0   20.30    3.80
   4  16   0   27.70    3.20
  -5 -16   0   23.70    4.20
   5  16   0   23.40    4.00
   7 -17   0  106.89    8.20
  -7  17   0  109.49    8.50
   6 -17   0  139.69    8.20
  -6  17   0  142.29    8.80
   5 -17   0   19.00    3.80
  -5  17   0   20.00    4.00
   4 -17   0   86.09    6.40
   4 -17   0  112.59    7.40
  -4  17   0  114.29    7.60
   3 -17   0    4.50    2.60
   3 -17   0    3.70    3.30
  -3  17   0   -2.90    3.10
   2 -17   0    0.80    2.10
   2 -17   0   -3.90    3.20
  -2  17   0   -1.80    3.00
   1 -17   0    4.00    3.30
  -1  17   0    1.90    2.10
  -1  17   0    0.90    3.30
   0 -17   0   24.30    3.90
   0  17   0   30.60    4.20
   0  17   0   26.90    3.20
  -1 -17   0  169.58    8.80
   1  17   0  185.28    8.50
   1  17   0  174.48    7.60
  -2 -17   0   60.49    5.10
   2  17   0   70.29    5.50
   2  17   0   68.19    5.90
   3  17   0   15.40    3.70
   3  17   0   19.60    3.20
  -4 -17   0   43.30    4.90
   4  17   0   48.10    4.00
   4  17   0   42.20    4.70
   6 -18   0    3.30    3.70
  -6  18   0   -0.70    3.80
   5 -18   0  133.39    7.90
  -5  18   0  134.99    8.90
   4 -18   0   19.00    3.50
   4 -18   0   16.00    4.10
  -4  18   0   12.40    4.00
   3 -18   0   -0.50    3.60
  -3  18   0    3.70    3.70
   2 -18   0    0.20    3.50
  -2  18   0   -2.60    3.30
   1 -18   0   13.60    3.90
  -1  18   0   17.50    3.80
   0 -18   0   54.19    5.00
   0  18   0   59.49    5.30
   0  18   0   53.19    5.10
  -1 -18   0   38.70    4.70
   1  18   0   37.10    3.80
  -2 -18   0   -0.30    3.60
   2  18   0   -1.90    2.90
  -4  19   0   16.50    4.30
   3 -19   0    2.00    3.80
  -3  19   0   -0.60    3.80
   2 -19   0   -0.40    3.80
  -2  19   0    0.50    3.70
   1 -19   0   67.99    5.70
  -1  19   0   55.79    5.30
   0 -19   0   33.80    4.60
   0  19   0   30.80    4.80
  -1 -19   0   10.50    4.10
   1  19   0   12.40    3.20
  -1  20  -1    8.00    4.10
   1 -20   1   12.30    4.30
  -2  20  -1   12.50    4.30
   2 -20   1    3.50    4.10
  -3  20  -1   10.10    4.40
   3 -20   1    1.80    4.30
   2  19  -1    9.10    3.30
   2  19  -1    9.80    3.40
  -2 -19   1    7.70    4.00
   1  19  -1   61.89    5.80
  -1 -19   1   50.09    5.20
   0  19  -1   56.39    5.30
   0  19  -1   54.89    5.10
   0 -19   1   53.19    5.10
  -1  19  -1   -4.50    3.40
   1 -19   1   -2.50    3.50
  -2  19  -1   -3.40    3.40
   2 -19   1   -2.50    3.70
  -3  19  -1   -0.60    3.70
   3 -19   1   -0.20    3.80
  -4  19  -1   18.90    4.30
   4 -19   1   12.30    4.20
  -5  19  -1   39.40    5.10
   5 -19   1   39.80    4.60
   3  18  -1   67.89    5.90
   3  18  -1   60.89    5.20
  -3 -18   1   59.99    5.30
   2  18  -1   23.50    3.70
   2  18  -1   25.70    3.60
  -2 -18   1   26.50    4.30
   1  18  -1   78.49    5.80
   1  18  -1   70.39    5.50
   1  18  -1   74.89    6.00
  -1 -18   1   79.79    7.30
   0  18  -1   -2.50    3.20
   0 -18   1    1.10    3.50
  -1  18  -1   -0.30    3.20
   1 -18   1   -2.30    3.40
  -2  18  -1   -1.90    3.20
   2 -18   1   -1.90    3.50
  -3  18  -1    4.90    3.50
   3 -18   1   -0.20    3.60
   3 -18   1   -1.50    2.70
  -4  18  -1   60.59    5.30
   4 -18   1   55.89    5.80
   4 -18   1   57.69    5.10
  -5  18  -1   93.39    8.20
   5 -18   1   87.29    6.90
  -6  18  -1  101.39    8.50
   6 -18   1   84.69    7.50
   4  17  -1   20.00    3.30
   4  17  -1   19.60    3.80
   3  17  -1   33.30    3.60
   3  17  -1   29.00    4.00
  -3 -17   1   26.50    4.20
   2  17  -1  318.87   10.50
   2  17  -1  317.67   11.10
  -2 -17   1  315.67   11.40
   1  17  -1   80.99    6.70
   1  17  -1   86.29    5.80
  -1 -17   1   75.49    7.00
   0  17  -1   -1.60    2.80
   0  17  -1    1.40    2.60
   0 -17   1   -1.10    3.10
  -1  17  -1   -1.90    2.90
   1 -17   1   -2.80    3.20
  -2  17  -1   -1.30    3.00
   2 -17   1   -0.10    2.10
   2 -17   1   -3.40    3.00
  -3  17  -1   66.59    5.20
   3 -17   1   70.89    6.50
   3 -17   1   72.39    5.30
  -4  17  -1   40.60    4.40
   4 -17   1   41.20    4.10
   4 -17   1   40.20    4.20
  -5  17  -1  316.17   11.60
   5 -17   1  313.07   11.50
  -6  17  -1    5.00    3.80
   6 -17   1    9.40    3.80
  -7  17  -1  104.59    8.10
   7 -17   1   97.19    7.90
   5  16  -1   18.70    4.00
   5  16  -1   19.20    3.00
   4  16  -1   -1.90    2.90
   4  16  -1   -0.30    2.30
  -4 -16   1   -2.80    2.90
   3  16  -1   86.49    6.30
   3  16  -1   85.39    5.40
  -3 -16   1   79.19    6.70
   2  16  -1   30.80    3.50
   2  16  -1   29.10    3.40
   2  16  -1   30.70    3.50
  -2 -16   1   21.10    3.70
   1  16  -1   30.90    3.70
   1  16  -1   26.50    3.30
  -1 -16   1   20.10    3.50
   0  16  -1   -2.50    2.60
   0  16  -1   -0.10    2.40
   0 -16   1   -4.60    2.90
  -1  16  -1    1.80    2.80
   1 -16   1   10.70    1.90
   1 -16   1    6.10    3.10
  -2  16  -1   31.90    3.80
   2 -16   1   31.70    3.00
   2 -16   1   31.60    3.80
  -3  16  -1   68.69    6.30
   3 -16   1   75.69    6.30
   3 -16   1   65.19    5.10
  -4  16  -1  744.53   20.40
   4 -16   1  765.92   20.30
   4 -16   1  743.33   21.30
  -5  16  -1   53.09    4.70
   5 -16   1   56.69    5.70
   5 -16   1   56.49    4.50
  -6  16  -1  115.19    7.50
   6 -16   1  100.19    7.30
  -7  16  -1  101.99    7.70
  -8  16  -1   89.09    7.80
   6  15  -1    4.30    3.60
  -6 -15   1    9.30    3.50
   5  15  -1    2.40    3.20
   5  15  -1    3.10    2.30
   4  15  -1   67.69    6.10
   4  15  -1   68.09    4.80
  -4 -15   1   59.09    4.50
   3  15  -1   67.59    4.70
   3  15  -1   65.19    5.70
  -3 -15   1   56.39    4.40
   2  15  -1   15.10    2.70
   2  15  -1    9.80    2.80
  -2 -15   1   12.20    3.20
   1  15  -1    0.20    2.20
   1  15  -1   -0.80    2.50
  -1 -15   1   -0.40    2.70
   0  15  -1  272.37    9.20
   0  15  -1  262.77    8.90
   0 -15   1  257.37    7.50
   0 -15   1  266.67    9.50
  -1  15  -1   79.79    5.70
  -1  15  -1   82.59    5.20
   1 -15   1   73.59    5.90
   1 -15   1   75.89    4.00
  -2  15  -1    8.60    1.80
  -2  15  -1    6.50    2.80
   2 -15   1    7.10    2.90
   2 -15   1    7.90    2.30
  -3  15  -1  421.36   12.80
  -3  15  -1  419.66   11.60
   3 -15   1  425.36   12.80
   3 -15   1  408.56   12.60
  -4  15  -1    0.20    2.90
   4 -15   1   -2.60    2.60
   4 -15   1   -0.60    2.70
  -5  15  -1  149.19    7.50
   5 -15   1  147.99    7.20
  -6  15  -1  110.89    7.00
  -7  15  -1   81.39    6.90
  -8  15  -1   10.90    3.70
   7  14  -1    1.60    3.50
  -7 -14   1   -2.70    2.90
   6  14  -1   -0.10    2.20
   6  14  -1    0.00    3.00
  -6 -14   1    2.80    2.90
   5  14  -1   57.79    4.40
   5  14  -1   54.59    4.90
   4  14  -1  148.29    7.40
   4  14  -1  146.89    6.10
  -4 -14   1  140.99    7.00
   3  14  -1   -1.00    2.20
   3  14  -1   -0.50    2.40
   3  14  -1   -2.20    2.00
  -3 -14   1   -0.30    2.50
   2  14  -1   68.29    4.90
   2  14  -1   68.39    4.60
  -2 -14   1   72.59    5.50
   1  14  -1  358.76   10.80
   1  14  -1  358.86   10.60
  -1 -14   1  357.86   11.10
   0  14  -1    3.70    2.20
   0  14  -1    3.80    2.30
   0 -14   1    3.40    1.30
   0 -14   1    4.90    2.60
  -1  14  -1   36.10    3.20
  -1  14  -1   31.50    3.10
   1 -14   1   35.20    3.30
   1 -14   1   38.50    3.10
  -2  14  -1  677.83   18.10
  -2  14  -1  674.93   17.80
   2 -14   1  688.33   18.50
   2 -14   1  668.73   18.00
  -3  14  -1   19.60    1.90
  -3  14  -1   14.20    2.90
   3 -14   1   16.00    2.70
   3 -14   1   17.80    2.90
  -4  14  -1  375.96   11.90
   4 -14   1  399.36   11.80
  -5  14  -1  212.08    8.50
   5 -14   1  229.28    8.20
  -6  14  -1  105.59    6.60
  -7  14  -1    8.80    3.20
  -8  14  -1  184.28    8.50
  -9  14  -1   26.40    4.10
   7  13  -1    2.60    3.30
  -7 -13   1    2.70    2.80
   6  13  -1   41.20    4.70
   6  13  -1   48.80    4.10
  -6 -13   1   46.00    3.90
   5  13  -1  101.69    5.00
   5  13  -1  102.19    6.60
  -5 -13   1  105.29    5.90
   4  13  -1    2.60    2.00
   4  13  -1   -1.60    2.40
  -4 -13   1    1.10    2.50
   3  13  -1  355.66   10.50
   3  13  -1  356.16   10.30
  -3 -13   1  352.66   10.80
   2  13  -1  349.57   10.30
   2  13  -1  332.07   10.00
  -2 -13   1  351.46   10.60
   1  13  -1   49.10    3.90
   1  13  -1   47.40    4.20
  -1 -13   1   44.50    3.60
   0  13  -1  117.09    5.40
   0  13  -1  107.49    5.20
   0 -13   1  107.09    3.80
   0 -13   1  119.79    5.70
  -1  13  -1 1192.88   29.00
  -1  13  -1 1191.08   29.20
   1 -13   1 1193.98   30.60
   1 -13   1 1171.68   29.10
  -2  13  -1    0.90    2.10
  -2  13  -1    1.30    1.30
   2 -13   1   -1.80    2.10
   2 -13   1   -1.90    1.80
  -3  13  -1  138.39    5.00
  -3  13  -1  171.38    6.80
   3 -13   1  169.48    6.70
  -4  13  -1   35.30    3.40
   4 -13   1   41.70    3.40
  -5  13  -1    8.40    2.70
   5 -13   1    6.70    2.50
  -6  13  -1    9.90    2.80
   6 -13   1   16.80    2.80
  -7  13  -1  170.48    7.50
  -8  13  -1  146.19    7.40
  -9  13  -1   40.00    4.20
   8  12  -1   36.70    5.00
  -8 -12   1   38.30    3.90
   7  12  -1   -2.90    3.10
   7  12  -1    3.70    2.10
  -7 -12   1    4.80    2.60
   6  12  -1  343.27   12.00
   6  12  -1  326.97    9.80
  -6 -12   1  348.67   10.60
   5  12  -1    3.80    1.90
   5  12  -1   -1.70    2.50
  -5 -12   1    0.40    2.20
   4  12  -1  732.83   20.50
   4  12  -1  727.93   18.50
   4  12  -1  749.92   18.70
  -4 -12   1  723.53   18.90
   3  12  -1  329.27    9.40
   3  12  -1  318.17    9.40
  -3 -12   1  321.57    9.80
   2  12  -1   96.99    4.50
   2  12  -1   95.49    4.80
  -2 -12   1   95.29    5.20
   1  12  -1  316.97    9.40
   1  12  -1  329.87    9.50
  -1 -12   1  327.27    9.70
   0  12  -1  876.41   21.80
   0  12  -1  870.81   21.60
   0 -12   1  863.11   22.30
   0 -12   1  876.21   21.80
  -1  12  -1    3.30    1.90
  -1  12  -1    5.20    1.80
   1 -12   1    4.10    1.50
   1 -12   1    2.90    2.00
  -2  12  -1 1400.76   34.80
  -2  12  -1 1392.16   33.70
   2 -12   1 1399.76   33.70
  -3  12  -1   12.90    2.40
   3 -12   1    8.80    2.30
  -4  12  -1   26.00    2.80
   4 -12   1   22.00    2.60
  -5  12  -1   23.20    2.90
   5 -12   1   25.00    2.70
  -6  12  -1  184.38    7.40
   6 -12   1  193.88    7.00
  -7  12  -1   55.89    5.20
   7 -12   1   61.39    3.70
  -8  12  -1   18.40    3.20
   8 -12   1   18.50    2.30
  -9  12  -1   16.10    3.40
 -10  12  -1   16.80    3.60
   8  11  -1   47.10    5.20
  -8 -11   1   49.30    3.90
   7  11  -1  437.16   14.40
   7  11  -1  425.36   11.80
  -7 -11   1  437.66   12.40
   6  11  -1   -1.00    2.70
   6  11  -1    0.50    1.80
  -6 -11   1    1.60    2.20
   5  11  -1  346.67    9.90
   5  11  -1  346.37   11.60
  -5 -11   1  355.86   10.30
  -5 -11   1  347.87   10.00
   4  11  -1   64.59    5.10
   4  11  -1   73.39    3.90
   4  11  -1   78.19    4.00
  -4 -11   1   73.79    4.60
  -4 -11   1   78.99    4.00
   3  11  -1   34.90    3.20
   3  11  -1   32.70    2.60
  -3 -11   1   38.90    3.20
  -3 -11   1   32.90    2.90
   2  11  -1  707.33   17.80
   2  11  -1  690.13   17.70
  -2 -11   1  715.73   17.90
  -2 -11   1  714.23   18.00
   1  11  -1 1054.69   25.80
   1  11  -1 1050.29   25.70
  -1 -11   1 1046.20   25.90
  -1 -11   1 1103.19   26.00
   0  11  -1   45.20    3.50
   0  11  -1   40.40    3.30
   0 -11   1   45.10    2.30
   0 -11   1   51.09    3.40
   0 -11   1   50.59    3.80
  -1  11  -1  883.11   22.00
  -1  11  -1  898.81   22.20
   1 -11   1  922.51   22.20
   1 -11   1  879.91   23.20
   1 -11   1  895.51   22.10
  -2  11  -1    6.90    1.90
  -2  11  -1    5.50    1.90
   2 -11   1    4.60    1.90
  -3  11  -1    2.90    1.90
  -3  11  -1    6.60    1.20
   3 -11   1    4.90    1.80
  -4  11  -1   28.30    2.70
   4 -11   1   24.60    2.60
  -5  11  -1   43.10    2.30
  -5  11  -1   60.09    4.40
   5 -11   1   60.99    4.10
  -6  11  -1  160.78    5.60
  -6  11  -1  185.48    7.10
   6 -11   1  199.38    6.00
   6 -11   1  200.78    6.70
  -7  11  -1  119.49    6.10
  -7  11  -1  125.39    4.70
   7 -11   1  125.19    4.80
  -8  11  -1   60.39    5.30
   8 -11   1   68.29    4.10
  -9  11  -1   37.90    3.90
   9 -11   1   43.50    4.00
 -10  11  -1    1.70    3.10
   9  10  -1   76.39    7.50
  -9 -10   1   81.79    5.60
   8  10  -1  465.85   15.30
  -8 -10   1  453.15   12.90
   7  10  -1    5.60    3.10
   7  10  -1    8.10    2.10
  -7 -10   1    7.10    2.30
   6  10  -1  621.24   18.00
   6  10  -1  615.14   15.70
  -6 -10   1  614.24   16.00
  -6 -10   1  609.44   15.90
   5  10  -1    1.50    2.40
   5  10  -1    2.50    1.70
  -5 -10   1    0.80    1.90
  -5 -10   1    0.80    1.50
   4  10  -1   64.49    4.90
   4  10  -1   73.69    3.60
   4  10  -1   75.79    3.80
  -4 -10   1   73.39    3.70
  -4 -10   1   72.59    4.20
  -4 -10   1   69.69    3.70
   3  10  -1  700.23   17.60
   3  10  -1  686.03   17.50
  -3 -10   1  719.53   17.90
  -3 -10   1  722.13   17.70
   2  10  -1 1003.10   24.20
   2  10  -1  986.30   24.10
  -2 -10   1 1021.90   24.30
  -2 -10   1  986.50   24.30
   1  10  -1   10.40    1.70
   1  10  -1    7.10    1.60
  -1 -10   1    8.40    1.70
  -1 -10   1    7.10    1.90
   0  10  -1  140.29    5.10
   0  10  -1  141.69    5.00
   0 -10   1  139.59    4.30
   0 -10   1  134.79    5.20
   0 -10   1  145.89    5.10
  -1  10  -1  321.77    9.00
  -1  10  -1  308.37    9.00
   1 -10   1  307.77    9.00
   1 -10   1  341.27    9.10
  -2  10  -1    3.00    1.00
  -2  10  -1    1.30    1.50
  -2  10  -1   -0.10    1.60
   2 -10   1   -0.20    1.50
   2 -10   1    0.50    1.40
  -3  10  -1   -2.50    1.60
  -3  10  -1    0.80    0.90
   3 -10   1    0.20    0.40
   3 -10   1   -1.70    1.60
  -4  10  -1   11.90    1.40
  -4  10  -1    7.40    1.90
   4 -10   1    9.20    1.90
  -5  10  -1   52.09    4.10
   5 -10   1   56.69    3.80
   5 -10   1   55.49    2.90
  -6  10  -1   80.29    3.50
  -6  10  -1   74.29    4.80
   6 -10   1   81.09    4.30
   6 -10   1   87.09    3.70
  -7  10  -1  119.39    5.80
  -7  10  -1  123.99    4.70
   7 -10   1  129.09    5.00
  -8  10  -1    0.80    2.40
   8 -10   1    6.50    2.00
  -9  10  -1   10.10    2.90
   9 -10   1   11.80    2.50
 -10  10  -1    5.10    3.00
   9   9  -1  274.47   11.20
  -9  -9   1  273.57    8.90
   8   9  -1    2.50    3.10
   8   9  -1    0.40    1.80
  -8  -9   1    1.50    2.20
   7   9  -1  425.16   12.00
   7   9  -1  441.76   11.80
   7   9  -1  453.15   14.10
  -7  -9   1  439.66   12.00
   6   9  -1    5.10    2.60
   6   9  -1    8.80    1.80
   6   9  -1    5.50    1.20
   6   9  -1    5.50    1.20
  -6  -9   1    7.30    1.80
  -6  -9   1    6.80    2.00
   5   9  -1   12.70    1.70
   5   9  -1   16.20    2.00
   5   9  -1   14.60    2.70
  -5  -9   1   12.20    1.80
  -5  -9   1   13.50    1.90
  -5  -9   1   13.90    2.10
   4   9  -1  321.37    9.00
   4   9  -1  320.97    9.20
   4   9  -1  333.87   10.50
  -4  -9   1  346.97    9.30
  -4  -9   1  347.77    9.50
  -4  -9   1  357.86    9.40
   3   9  -1  125.09    4.40
   3   9  -1  116.29    4.40
  -3  -9   1  117.59    4.40
  -3  -9   1  109.99    4.80
  -3  -9   1  120.49    4.40
   2   9  -1  154.78    5.10
   2   9  -1  152.18    5.00
  -2  -9   1  145.79    5.30
  -2  -9   1  163.28    5.20
   1   9  -1  812.32   19.90
   1   9  -1  809.52   20.00
  -1  -9   1  803.52   20.10
  -1  -9   1  864.41   20.10
   0   9  -1  336.47    9.20
   0   9  -1  339.27    9.30
   0  -9   1  343.17    9.30
   0  -9   1  335.27    9.10
   0  -9   1  351.86    9.30
  -1   9  -1   -1.20    1.40
  -1   9  -1    0.90    1.30
   1  -9   1    0.90    1.30
   1  -9   1    1.10    1.40
  -2   9  -1   22.20    1.80
  -2   9  -1   19.00    2.00
  -2   9  -1   20.10    2.00
   2  -9   1   24.60    2.20
   2  -9   1   21.70    2.10
  -3   9  -1   25.00    1.80
  -3   9  -1   16.10    2.00
   3  -9   1   19.60    2.00
   3  -9   1   15.80    1.70
  -4   9  -1  368.36   10.00
  -4   9  -1  362.16   10.20
   4  -9   1  374.86   10.30
   4  -9   1  361.46    9.80
   4  -9   1  377.76   10.00
  -5   9  -1  180.38    6.30
   5  -9   1  191.98    6.10
   5  -9   1  183.08    5.60
  -6   9  -1  382.36   11.00
  -6   9  -1  399.56   10.90
  -6   9  -1  397.06   10.80
   6  -9   1  390.56   10.50
   6  -9   1  399.06   10.90
  -7   9  -1   -3.40    2.00
  -7   9  -1    1.10    1.50
   7  -9   1    2.20    1.70
  -8   9  -1   54.09    4.70
  -8   9  -1   58.39    3.80
   8  -9   1   63.89    4.20
  -9   9  -1   11.80    2.80
   9  -9   1   16.70    2.70
 -10   9  -1   12.40    3.00
  10  -9   1   15.70    3.00
   9   8  -1   12.40    3.80
  -9  -8   1    6.20    2.40
   8   8  -1  412.46   13.40
   8   8  -1  387.26   10.80
   8   8  -1  377.76   11.50
  -8  -8   1  399.76   11.00
   7   8  -1    6.80    1.80
   7   8  -1    7.00    1.70
   7   8  -1    9.30    1.60
   7   8  -1    8.30    2.90
  -7  -8   1    8.10    2.00
   6   8  -1   -1.20    2.30
   6   8  -1    1.60    1.10
   6   8  -1   -0.20    1.50
   6   8  -1    1.30    1.20
  -6  -8   1    0.90    1.40
  -6  -8   1   -0.60    1.70
   5   8  -1   91.89    3.20
   5   8  -1   91.49    5.30
   5   8  -1   95.59    3.60
   5   8  -1   91.09    3.20
   5   8  -1   93.99    3.90
  -5  -8   1   98.09    3.90
  -5  -8   1   96.99    4.10
  -5  -8   1   95.89    3.80
   4   8  -1    2.10    1.30
   4   8  -1    1.40    1.80
   4   8  -1    5.70    1.50
  -4  -8   1    1.90    1.40
  -4  -8   1    2.10    1.30
  -4  -8   1    0.80    1.20
   3   8  -1  546.45   13.70
   3   8  -1  540.25   13.80
  -3  -8   1  572.34   13.90
  -3  -8   1  560.44   13.90
  -3  -8   1  552.24   14.00
   2   8  -1  211.98    6.30
   2   8  -1  218.98    6.30
  -2  -8   1  222.58    6.40
  -2  -8   1  225.58    6.40
  -2  -8   1  214.28    6.50
   1   8  -1   37.80    2.60
   1   8  -1   43.20    2.70
  -1  -8   1   38.10    2.90
  -1  -8   1   41.80    2.60
   0   8  -1   58.39    2.90
   0  -8   1   62.69    3.00
   0  -8   1   59.99    2.40
   0  -8   1   58.79    3.20
  -1   8  -1  437.96   11.40
  -1   8  -1  448.16   11.40
   1  -8   1  435.36   11.40
   1  -8   1  459.25   11.50
  -2   8  -1  243.48    7.10
  -2   8  -1  239.48    7.00
  -2   8  -1  255.37    6.80
   2  -8   1  243.78    7.00
   2  -8   1  247.48    7.10
  -3   8  -1  647.04   16.30
  -3   8  -1  621.84   15.90
   3  -8   1  649.64   16.00
   3  -8   1  635.24   15.80
  -4   8  -1    7.70    1.20
  -4   8  -1    8.20    1.70
  -4   8  -1    8.40    1.60
   4  -8   1    7.70    1.60
   4  -8   1    8.10    1.70
   4  -8   1    6.80    1.20
  -5   8  -1  701.13   17.00
  -5   8  -1  638.94   16.90
   5  -8   1  676.73   17.10
   5  -8   1  682.33   17.40
   5  -8   1  684.33   16.70
  -6   8  -1  114.29    5.00
  -6   8  -1  127.89    4.80
  -6   8  -1  118.29    4.40
   6  -8   1  120.79    4.40
   6  -8   1  129.09    4.70
  -7   8  -1   26.00    2.30
  -7   8  -1   25.00    2.50
  -7   8  -1   18.20    2.50
   7  -8   1   19.10    2.20
   7  -8   1   23.00    2.40
  -8   8  -1    5.20    2.30
  -8   8  -1    6.10    1.90
   8  -8   1    5.20    2.10
  -9   8  -1   64.99    5.00
   9  -8   1   69.09    5.00
 -10   8  -1  243.28    8.30
  10  -8   1  223.48    9.00
 -11   8  -1    2.60    2.80
  11  -8   1    1.20    2.90
  10   7  -1    1.50    3.40
 -10  -7   1   -1.60    2.20
   9   7  -1  268.67    9.10
   9   7  -1  271.37   10.80
  -9  -7   1  266.57    8.50
   8   7  -1   38.10    3.40
   8   7  -1   48.00    4.50
  -8  -7   1   44.70    3.80
   7   7  -1    6.10    2.60
   7   7  -1    4.50    1.70
   7   7  -1    4.50    1.60
  -7  -7   1    3.90    1.70
   6   7  -1   47.30    2.80
   6   7  -1   49.20    3.00
   6   7  -1   42.80    3.70
  -6  -7   1   43.50    3.20
  -6  -7   1   51.19    2.80
   5   7  -1  108.59    3.60
   5   7  -1  103.29    3.60
   5   7  -1   95.69    5.30
   5   7  -1  105.99    4.00
  -5  -7   1   99.19    4.00
  -5  -7   1  107.49    3.90
  -5  -7   1  109.19    4.00
   4   7  -1  830.12   20.20
   4   7  -1  814.42   22.10
   4   7  -1  830.42   21.30
   4   7  -1  860.91   20.10
  -4  -7   1  845.22   20.40
  -4  -7   1  853.91   20.30
  -4  -7   1  865.11   20.30
   3   7  -1   31.00    2.10
   3   7  -1   39.80    2.50
  -3  -7   1   34.90    2.30
  -3  -7   1   28.20    2.20
  -3  -7   1   29.10    2.10
   2   7  -1  529.55   13.30
   2   7  -1  536.25   13.30
  -2  -7   1  539.85   13.40
  -2  -7   1  560.54   13.50
   1   7  -1  256.77    7.10
   1   7  -1  257.37    7.10
  -1  -7   1  275.17    7.20
  -1  -7   1  270.07    7.20
   0   7  -1   38.40    2.40
   0   7  -1   39.50    2.30
   0  -7   1   40.00    2.50
  -1   7  -1  201.38    5.80
  -1   7  -1  196.98    5.80
   1  -7   1  208.28    5.90
   1  -7   1  203.98    5.80
  -2   7  -1 1708.23   40.90
  -2   7  -1 1632.84   38.90
  -2   7  -1 1671.93   39.00
   2  -7   1 1672.23   38.90
  -3   7  -1  582.84   13.90
  -3   7  -1  535.65   14.30
  -3   7  -1  562.34   13.90
   3  -7   1  552.94   13.80
   3  -7   1  576.74   14.00
   3  -7   1  535.05   14.10
  -4   7  -1  956.70   23.50
  -4   7  -1 1014.90   23.60
  -4   7  -1  999.80   24.60
   4  -7   1  964.80   24.50
   4  -7   1  996.40   23.70
   4  -7   1  965.00   23.40
  -5   7  -1  566.04   14.60
  -5   7  -1  598.24   14.60
   5  -7   1  587.04   14.80
   5  -7   1  574.54   15.20
   5  -7   1  577.64   14.30
  -6   7  -1   76.99    3.70
  -6   7  -1   72.39    3.90
  -6   7  -1   79.59    3.50
   6  -7   1   65.49    3.30
   6  -7   1   82.79    3.80
  -7   7  -1   48.00    3.30
  -7   7  -1   39.30    3.20
  -7   7  -1   40.30    3.60
   7  -7   1   39.30    2.70
   7  -7   1   44.80    3.60
  -8   7  -1  103.89    5.10
  -8   7  -1  110.19    4.90
   8  -7   1  103.09    5.40
  -9   7  -1  222.78    7.60
   9  -7   1  215.28    8.50
 -10   7  -1    2.10    2.50
  10  -7   1    5.10    2.80
 -11   7  -1  204.28    7.70
  11  -7   1  195.18    9.10
  10   6  -1   66.79    5.50
  10   6  -1   71.89    7.00
 -10  -6   1   60.39    4.40
   9   6  -1   81.39    6.60
   9   6  -1   69.39    4.10
  -9  -6   1   66.49    4.40
   8   6  -1   30.60    3.80
   8   6  -1   34.40    2.70
  -8  -6   1   31.90    2.50
   7   6  -1  104.99    4.30
   7   6  -1  111.29    6.10
  -7  -6   1  104.59    4.00
  -7  -6   1  110.69    4.40
   6   6  -1   67.59    4.90
   6   6  -1   74.59    3.40
  -6  -6   1   79.29    3.40
  -6  -6   1   78.59    3.20
   5   6  -1  867.71   22.90
   5   6  -1  863.61   20.50
   5   6  -1  849.32   20.70
  -5  -6   1  871.21   20.70
  -5  -6   1  873.81   20.90
   4   6  -1   10.40    1.90
   4   6  -1   16.00    1.40
   4   6  -1   14.20    1.50
  -4  -6   1   13.60    1.50
  -4  -6   1   10.50    1.30
   3   6  -1  902.21   22.00
   3   6  -1  941.61   21.90
  -3  -6   1  946.01   22.10
  -3  -6   1  932.21   22.10
   2   6  -1   29.60    1.90
   2   6  -1   28.50    2.00
  -2  -6   1   28.40    1.90
  -2  -6   1   25.50    2.10
  -2  -6   1   25.90    1.80
   1   6  -1  202.88    5.60
   1   6  -1  202.18    5.60
  -1  -6   1  209.18    5.70
  -1  -6   1  197.18    5.70
  -1  -6   1  211.98    5.70
   0   6  -1   73.19    2.90
   0   6  -1   74.09    2.90
   0  -6   1   74.09    2.80
   0  -6   1   78.09    3.00
  -1   6  -1  395.16   10.10
  -1   6  -1  403.46   10.40
  -1   6  -1  412.96   10.20
   1  -6   1  410.46   10.20
  -2   6  -1  243.48    6.80
  -2   6  -1  265.17    6.90
  -2   6  -1  249.97    6.90
  -2   6  -1  267.77    6.80
   2  -6   1  240.28    6.70
   2  -6   1  249.97    6.80
  -3   6  -1  771.32   19.00
  -3   6  -1  763.02   18.10
  -3   6  -1  726.43   18.10
   3  -6   1  741.03   18.00
   3  -6   1  761.12   18.20
   3  -6   1  741.83   18.80
  -4   6  -1  859.41   20.00
  -4   6  -1  821.82   20.00
  -4   6  -1  836.52   20.90
   4  -6   1  820.82   19.80
   4  -6   1  815.22   21.00
   4  -6   1  831.92   20.10
  -5   6  -1    8.10    1.70
   5  -6   1   10.30    1.60
   5  -6   1    9.00    1.50
  -6   6  -1  194.18    5.90
  -6   6  -1  188.88    6.00
  -6   6  -1  184.58    6.10
   6  -6   1  200.38    5.50
   6  -6   1  176.68    6.50
   6  -6   1  202.38    6.10
  -7   6  -1  399.76   10.50
  -7   6  -1  394.76   10.60
  -7   6  -1  403.56   11.30
   7  -6   1  380.86   11.70
  -8   6  -1  463.15   12.30
   8  -6   1  457.25   13.80
  -9   6  -1    5.00    2.20
   9  -6   1    5.70    2.60
 -10   6  -1  242.58    8.00
  10  -6   1  238.98    9.60
 -11   6  -1    7.60    2.70
  11  -6   1   10.90    3.50
  10   5  -1   91.19    7.00
 -10  -5   1   75.29    4.30
   9   5  -1  113.29    6.90
   9   5  -1  111.69    4.80
  -9  -5   1  106.69    4.70
   8   5  -1   28.70    3.40
   8   5  -1   36.30    3.10
  -8  -5   1   30.10    2.50
  -8  -5   1   34.40    2.50
   7   5  -1   12.00    1.80
   7   5  -1   10.30    2.60
  -7  -5   1   14.30    1.50
  -7  -5   1   14.70    1.80
   6   5  -1   49.50    2.90
   6   5  -1   51.59    4.20
  -6  -5   1   54.59    2.50
  -6  -5   1   59.09    2.80
   4   5  -1 1444.56   34.20
   4   5  -1 1472.45   34.00
   4   5  -1 1456.65   37.00
  -4  -5   1 1480.95   34.20
  -4  -5   1 1499.25   34.20
   3   5  -1  557.04   13.90
   3   5  -1  582.64   13.80
  -3  -5   1  572.14   13.90
  -3  -5   1  587.84   14.00
  -3  -5   1  581.54   13.80
   2   5  -1  347.37    8.80
   2   5  -1  362.86    8.80
  -2  -5   1  350.26    8.90
  -2  -5   1  365.86    8.90
  -2  -5   1  351.46    8.90
   1   5  -1  759.72   18.40
   1   5  -1  767.12   18.40
  -1  -5   1  761.02   18.40
  -1  -5   1  798.32   18.40
  -1  -5   1  810.72   18.50
   0   5  -1  189.78    5.40
   0   5  -1  196.48    5.40
   0  -5   1  197.18    5.40
   0  -5   1  213.78    5.50
   0  -5   1  201.48    5.40
  -1   5  -1  206.18    5.70
  -1   5  -1  211.08    5.60
  -1   5  -1  222.98    5.70
  -1   5  -1  202.68    5.60
   1  -5   1  205.68    5.60
  -2   5  -1  345.77    9.00
  -2   5  -1  364.16    9.30
  -2   5  -1  371.66    9.00
   2  -5   1  364.96    9.00
   2  -5   1  349.57    9.20
   2  -5   1  350.96    8.90
  -3   5  -1 1577.64   36.70
  -3   5  -1 1588.44   38.80
  -3   5  -1 1568.34   36.70
   3  -5   1 1566.94   36.80
   3  -5   1 1560.04   36.60
   3  -5   1 1625.54   38.80
  -4   5  -1  624.94   15.10
  -4   5  -1  633.24   15.90
  -4   5  -1  621.44   15.10
   4  -5   1  640.74   15.20
   4  -5   1  625.04   14.90
   4  -5   1  579.54   16.00
  -5   5  -1 1455.65   39.10
  -5   5  -1 1613.94   36.90
  -5   5  -1 1622.64   36.90
   5  -5   1 1649.23   36.70
   5  -5   1 1568.94   39.60
  -6   5  -1  513.25   13.70
  -6   5  -1  509.75   12.70
  -6   5  -1  497.05   12.80
   6  -5   1  514.55   14.10
   6  -5   1  508.05   12.30
  -7   5  -1  300.27    8.20
  -7   5  -1  294.57    8.30
  -7   5  -1  303.17    9.10
   7  -5   1  297.67    9.50
  -8   5  -1   19.00    2.00
  -8   5  -1   17.80    2.20
   8  -5   1   19.00    2.80
  -9   5  -1  214.68    7.00
   9  -5   1  211.58    8.40
 -10   5  -1   -2.60    2.20
  10  -5   1   -0.30    2.60
 -11   5  -1   18.80    2.80
  11  -5   1   20.80    3.80
  11   4  -1   87.79    7.40
  11   4  -1   95.59    6.40
  10   4  -1   21.80    3.80
  10   4  -1   20.30    2.70
 -10  -4   1   23.90    2.20
   9   4  -1   -1.90    2.60
   9   4  -1   -1.00    1.70
  -9  -4   1   -1.20    1.60
   8   4  -1   79.69    5.60
   8   4  -1   78.49    3.90
  -8  -4   1   77.89    3.80
  -8  -4   1   84.59    3.30
   7   4  -1    0.30    1.40
   7   4  -1   -1.10    2.00
  -7  -4   1    0.40    1.30
  -7  -4   1    1.40    1.00
   6   4  -1  160.78    5.10
   6   4  -1  153.98    6.30
  -6  -4   1  164.48    4.60
  -6  -4   1  160.58    4.70
   5   4  -1  377.56    9.60
   5   4  -1  365.76   10.90
  -5  -4   1  379.46    9.30
  -5  -4   1  376.46    9.30
   4   4  -1  105.19    2.90
   4   4  -1  102.29    3.50
   4   4  -1  101.49    4.40
  -4  -4   1  111.19    3.60
  -4  -4   1  106.89    3.30
  -4  -4   1  107.09    3.20
   3   4  -1  780.52   19.10
   3   4  -1  836.12   19.00
  -3  -4   1  820.02   19.00
  -3  -4   1  820.92   19.00
  -3  -4   1  803.62   19.20
   2   4  -1  982.80   23.20
   2   4  -1  990.80   23.10
  -2  -4   1  996.60   23.20
  -2  -4   1 1002.70   23.20
  -2  -4   1 1012.80   23.30
   1   4  -1 1416.06   33.00
   1   4  -1 1454.25   33.00
  -1  -4   1 1375.26   33.00
  -1  -4   1 1431.86   33.00
  -1  -4   1 1482.45   33.00
   0   4  -1  158.28    4.30
   0   4  -1  152.38    4.20
   0   4  -1  149.29    4.20
   0  -4   1  154.88    4.30
   0  -4   1  157.38    4.30
   0  -4   1  150.98    4.20
  -1   4  -1    0.90    0.90
  -2   4  -1  177.28    5.10
  -2   4  -1  176.98    4.90
  -2   4  -1  182.48    4.90
   2  -4   1  187.48    5.00
   2  -4   1  184.78    5.00
   2  -4   1  181.78    4.90
  -3   4  -1  762.02   18.10
  -3   4  -1  770.52   18.10
  -3   4  -1  790.32   19.20
   3  -4   1  767.62   18.10
   3  -4   1  807.82   18.20
   3  -4   1  701.53   19.30
  -4   4  -1  797.42   18.60
  -4   4  -1  777.32   19.90
  -4   4  -1  777.62   18.60
   4  -4   1  794.92   18.50
   4  -4   1  777.32   20.10
  -5   4  -1 1969.50   46.00
  -5   4  -1 1994.20   49.10
  -5   4  -1 1994.50   46.00
   5  -4   1 2007.40   45.80
   5  -4   1 1990.40   49.40
  -6   4  -1  178.98    5.30
  -6   4  -1  174.98    5.40
  -6   4  -1  185.98    6.10
   6  -4   1  177.28    6.20
  -7   4  -1   13.90    2.10
  -7   4  -1   12.10    1.80
  -7   4  -1   12.80    1.60
   7  -4   1   12.60    2.20
  -8   4  -1  551.64   13.90
  -8   4  -1  548.05   13.80
   8  -4   1  550.74   15.90
  -9   4  -1   14.00    2.20
   9  -4   1   15.70    2.90
 -10   4  -1  127.69    5.50
  10  -4   1  128.29    6.90
 -11   4  -1    9.90    2.50
  11  -4   1    8.90    3.20
  11   3  -1   27.70    4.10
  10   3  -1   24.50    2.70
  10   3  -1   28.10    4.00
 -10  -3   1   23.40    2.10
   9   3  -1    8.40    2.90
   9   3  -1    6.80    2.00
  -9  -3   1    8.90    1.60
  -9  -3   1    8.70    1.40
   8   3  -1   -1.30    2.30
   8   3  -1    0.50    1.60
  -8  -3   1   -0.10    1.10
  -8  -3   1   -1.60    1.30
   7   3  -1  239.78    7.10
   7   3  -1  234.38    8.40
  -7  -3   1  250.07    6.50
  -7  -3   1  236.38    6.60
   6   3  -1   82.59    3.50
   6   3  -1   79.89    4.40
  -6  -3   1   88.69    3.10
  -6  -3   1   84.29    2.90
   5   3  -1 1340.77   34.50
   5   3  -1 1358.96   32.00
  -5  -3   1 1404.26   31.60
  -5  -3   1 1358.26   31.50
   4   3  -1  167.78    5.60
   4   3  -1  167.48    4.80
  -4  -3   1  171.68    4.40
  -4  -3   1  161.78    4.40
   3   3  -1   68.99    2.50
   3   3  -1   67.89    2.00
  -3  -3   1   74.79    2.60
  -3  -3   1   63.29    2.20
  -3  -3   1   69.19    2.10
   2   3  -1 6993.90  156.68
   2   3  -1 6626.64  157.48
  -2  -3   1 6693.03  157.28
  -2  -3   1 6918.51  156.68
  -2  -3   1 6939.81  156.78
   1   3  -1 3540.35   79.59
   1   3  -1 3338.37   79.79
  -1  -3   1 3405.36   79.89
  -1  -3   1 3506.25   79.59
  -1  -3   1 3487.45   79.59
   0   3  -1  298.87    7.30
   0   3  -1  287.87    7.20
   0   3  -1  306.67    7.30
   0  -3   1  299.37    7.30
   0  -3   1  305.77    7.30
   0  -3   1  292.57    7.20
  -1   3  -1 2491.45   57.39
  -1   3  -1 2555.84   62.09
  -1   3  -1 2527.95   58.49
  -1   3  -1 2497.85   57.39
   1  -3   1 2577.04   57.39
   1  -3   1 2511.45   58.29
   1  -3   1 2452.65   61.69
   1  -3   1 2487.75   57.39
  -2   3  -1  200.58    5.10
  -2   3  -1  202.78    5.10
  -2   3  -1  191.48    5.40
   2  -3   1  189.28    5.00
   2  -3   1  185.08    5.40
   2  -3   1  196.08    5.10
  -3   3  -1 2332.47   53.49
  -3   3  -1 2332.47   56.99
  -3   3  -1 2320.37   53.49
   3  -3   1 2373.26   57.79
   3  -3   1 2322.37   53.39
  -4   3  -1 1331.67   31.00
  -4   3  -1 1306.77   30.90
   4  -3   1 1338.07   30.80
   4  -3   1 1367.16   33.30
  -5   3  -1   97.69    3.40
  -5   3  -1   99.49    3.40
  -5   3  -1  105.69    4.00
   5  -3   1  101.89    3.00
   5  -3   1  106.69    4.10
  -6   3  -1   45.80    2.60
  -6   3  -1   54.79    3.30
  -6   3  -1   45.90    2.50
   6  -3   1   52.29    3.40
  -7   3  -1   84.89    4.30
  -7   3  -1   82.59    3.30
  -7   3  -1   82.09    3.50
   7  -3   1   88.09    4.60
  -8   3  -1   27.20    2.30
  -8   3  -1   29.60    2.10
   8  -3   1   33.30    3.30
  -9   3  -1   28.60    2.40
   9  -3   1   33.60    3.50
 -10   3  -1   -3.90    2.00
  10  -3   1   -1.90    2.40
 -11   3  -1   12.40    2.50
  11  -3   1   14.70    2.90
  11  -3   1   17.20    3.50
  11   2  -1    9.00    3.30
  10   2  -1    7.10    2.20
  10   2  -1    9.40    3.10
   9   2  -1    0.40    1.80
   9   2  -1   -0.30    2.40
  -9  -2   1    0.50    1.30
  -9  -2   1    0.00    1.20
   8   2  -1  159.18    5.60
   8   2  -1  157.78    6.90
  -8  -2   1  153.68    4.70
  -8  -2   1  163.08    4.80
   7   2  -1   32.70    2.90
   7   2  -1   23.90    2.70
  -7  -2   1   30.10    2.00
  -7  -2   1   30.30    2.20
   6   2  -1  786.32   21.10
   6   2  -1  831.02   19.50
  -6  -2   1  779.52   18.80
  -6  -2   1  808.72   18.90
   5   2  -1   11.70    1.80
   5   2  -1   10.10    1.50
  -5  -2   1   11.00    1.00
   4   2  -1  155.98    4.50
   4   2  -1  145.79    5.00
  -4  -2   1  154.38    3.90
  -4  -2   1  146.89    3.90
   3   2  -1   40.20    1.90
   3   2  -1   38.20    2.30
  -3  -2   1   39.80    1.50
  -3  -2   1   42.30    1.40
   2   2  -1 2106.89   49.20
   2   2  -1 2129.69   49.70
  -2  -2   1 2137.09   48.90
  -2  -2   1 2213.78   49.70
  -2  -2   1 2116.69   53.79
   1   2  -1  545.65   14.10
   1   2  -1  574.54   13.00
   1   2  -1  569.44   13.00
   1   2  -1  547.75   13.10
  -1  -2   1  554.94   13.00
  -1  -2   1  574.44   13.00
  -1  -2   1  565.04   13.10
   0   2  -1 9945.41  224.68
   0   2  -1 9857.81  224.78
   0  -2   1 9862.11  224.78
   0  -2   1 9489.15  250.27
   0  -2   1 9999.00  224.78
  -1   2  -1   48.90    1.60
  -1   2  -1   50.19    1.60
  -1   2  -1   54.69    1.60
  -1   2  -1   49.00    1.70
   1  -2   1   50.79    1.70
   1  -2   1   49.50    1.60
   1  -2   1   51.69    1.60
   1  -2   1   49.60    1.60
  -2   2  -1 4851.51  114.69
  -2   2  -1 4521.65  106.89
  -2   2  -1 4614.94  106.49
   2  -2   1 4708.33  106.79
   2  -2   1 4482.85  106.29
   2  -2   1 4744.13  115.29
  -3   2  -1   41.00    1.80
  -3   2  -1   40.40    1.70
  -3   2  -1   41.70    2.10
   3  -2   1   43.00    2.20
   3  -2   1   39.60    1.70
  -4   2  -1  102.69    3.10
  -4   2  -1  111.89    3.20
   4  -2   1  101.99    3.80
   4  -2   1  106.79    3.00
  -5   2  -1   11.70    1.60
  -5   2  -1    5.00    1.00
  -5   2  -1    5.50    1.00
   5  -2   1    8.30    1.50
  -6   2  -1  658.33   15.60
  -6   2  -1  660.23   17.40
  -6   2  -1  632.84   15.50
   6  -2   1  645.84   17.40
  -7   2  -1  141.69    4.60
  -7   2  -1  144.19    4.40
   7  -2   1  150.88    6.00
  -8   2  -1    1.30    1.20
  -8   2  -1    1.60    1.50
   8  -2   1    4.10    2.20
  -9   2  -1    1.30    1.60
   9  -2   1    2.10    2.50
 -10   2  -1   -2.80    1.90
  10  -2   1    0.50    2.70
  10  -2   1   -0.10    2.10
 -11   2  -1    2.70    2.20
  11  -2   1    4.90    3.10
  11   1  -1    3.00    2.90
  10   1  -1   -0.30    2.60
  10   1  -1    1.40    2.00
   9   1  -1   93.29    5.80
   9   1  -1   95.49    4.80
   8   1  -1   -4.30    1.70
   8   1  -1    0.80    2.30
  -8  -1   1   -3.60    1.10
   7   1  -1  805.92   19.70
   7   1  -1  792.12   21.30
  -7  -1   1  801.52   18.80
  -7  -1   1  803.22   18.80
   6   1  -1   39.60    2.90
   6   1  -1   34.30    2.80
  -6  -1   1   34.40    1.80
   5   1  -1  331.67    9.50
   4   1  -1  273.17    7.80
   3   1  -1  271.17    7.50
   2   1  -1  234.08    5.90
   1   1  -1 5990.60  144.49
   1   1  -1 5492.25  132.49
  -1  -1   1 5828.12  132.69
  -1   1  -1 1571.94   39.70
  -1   1  -1 1607.04   37.40
  -1   1  -1 1595.24   37.00
   1  -1   1 1555.64   36.90
   1  -1   1 1682.03   39.90
   1  -1   1 1589.74   36.60
  -2   1  -1   50.09    1.70
  -2   1  -1   51.19    2.20
  -2   1  -1   52.29    1.80
   2  -1   1   54.09    1.70
   2  -1   1   53.89    1.80
   2  -1   1   55.79    2.20
  -3   1  -1   19.30    1.30
  -3   1  -1   18.40    1.70
  -3   1  -1   18.50    1.20
   3  -1   1   19.10    1.20
   3  -1   1   20.10    1.70
  -4   1  -1  128.19    3.60
  -4   1  -1  113.99    4.30
  -4   1  -1  134.29    3.60
   4  -1   1  134.79    3.40
   4  -1   1  128.49    4.40
  -5   1  -1  908.81   22.90
  -5   1  -1  894.31   20.90
  -5   1  -1  887.51   20.80
   5  -1   1  873.01   22.90
  -6   1  -1  138.99    4.10
  -6   1  -1  137.69    4.20
   6  -1   1  137.49    5.40
  -7   1  -1   20.20    1.60
  -7   1  -1   20.70    1.70
   7  -1   1   19.60    2.60
  -8   1  -1   87.09    3.70
  -8   1  -1   92.99    3.50
   8  -1   1   83.59    5.20
  -9   1  -1   48.80    3.40
   9  -1   1   49.80    3.70
   9  -1   1   50.79    5.00
 -10   1  -1    1.20    1.90
  10  -1   1    3.00    2.00
  10  -1   1   -0.90    2.70
 -11   1  -1    7.60    2.20
  11  -1   1    3.30    3.10
  11   0  -1   11.40    3.30
  11   0  -1   13.00    2.70
  10   0  -1   64.29    4.60
  10   0  -1   65.69    5.50
   9   0  -1   -5.80    1.90
   9   0  -1    0.00    2.30
  -9   0   1    0.90    1.30
   8   0  -1  846.32   22.30
   8   0  -1  840.02   20.70
  -8   0   1  801.22   19.40
  -8   0   1  809.62   19.40
   7   0  -1   19.00    2.50
  -7   0   1   19.70    1.30
  -7   0   1   17.00    1.30
   6   0  -1  906.71   23.20
  -6   0   1  882.01   20.80
  -6   0   1  907.51   20.80
   5   0  -1  664.43   17.30
  -5   0   1  661.43   15.40
   4   0  -1   53.79    2.60
   3   0  -1  116.09    3.70
   2   0  -1   25.80    1.40
   1   0  -1  462.25   11.90
  -1   0   1  470.35   10.70
  -1   0  -1   13.20    0.80
  -1   0  -1   14.80    0.70
  -1   0  -1   13.10    0.80
   1   0   1   14.30    0.70
   1   0   1   14.00    0.90
  -2   0  -1  280.27    6.50
  -2   0  -1  267.77    7.20
  -2   0  -1  258.27    6.60
   2   0   1  252.67    7.20
   2   0   1  276.37    6.50
   2   0   1  276.77    6.40
  -3   0  -1  158.98    4.30
  -3   0  -1  161.98    5.00
  -3   0  -1  167.78    4.20
   3   0   1  168.08    4.10
   3   0   1  164.08    5.00
  -4   0  -1   50.29    1.90
  -4   0  -1   45.20    2.00
  -4   0  -1   50.29    2.80
   4   0   1   49.40    1.70
   4   0   1   47.60    2.80
  -5   0  -1  558.64   13.50
  -5   0  -1  569.04   13.60
  -5   0  -1  582.64   15.20
   5   0   1  547.25   15.10
  -6   0  -1    5.00    1.00
  -6   0  -1    6.00    1.20
   6   0   1    3.40    1.70
  -7   0  -1   41.90    2.40
  -7   0  -1   40.60    2.60
   7   0   1   45.60    3.00
   7   0   1   38.80    3.90
  -8   0  -1  123.09    4.40
  -8   0  -1  126.59    4.30
   8   0   1  119.29    4.70
   8   0   1  120.09    6.10
  -9   0  -1    0.90    1.60
   9   0   1    3.10    1.70
   9   0   1   -0.40    2.40
 -10   0  -1   14.90    2.10
  10   0   1   17.40    3.40
  10   0   1   12.30    2.20
 -11   0  -1    5.20    2.10
  11   0   1    3.80    3.20
  11  -1  -1    9.80    3.10
  11  -1  -1   10.90    2.70
  10  -1  -1    3.20    2.60
  10  -1  -1    0.30    2.50
   9  -1  -1  172.58    7.10
  -9   1   1  171.48    5.00
   8  -1  -1   35.50    3.10
  -8   1   1   30.20    2.50
  -8   1   1   29.30    2.00
   7  -1  -1  606.74   16.50
  -7   1   1  599.24   14.40
  -7   1   1  608.84   14.40
   6  -1  -1  271.37    8.30
  -6   1   1  279.77    6.90
  -6   1   1  283.27    6.90
   5  -1  -1   26.70    2.30
  -5   1   1   27.10    1.50
  -5   1   1   24.60    1.50
   4  -1  -1  111.29    3.80
  -4   1   1  117.29    3.10
  -4   1   1  118.49    3.10
   3  -1  -1  726.93   18.30
  -3   1   1  746.93   17.00
  -3   1   1  733.53   16.90
   2  -1  -1  990.40   25.00
   2  -1  -1 1065.89   23.40
  -2   1   1 1026.50   23.40
  -2   1   1 1015.50   23.50
   1  -1  -1  983.40   24.70
  -1   1   1  970.30   22.50
  -1   1   1  998.90   22.60
   0  -1  -1    2.30    0.30
   0  -1  -1    2.00    0.30
   0  -1  -1    0.90    0.30
   0   1   1    1.60    0.30
   0   1   1    0.90    0.30
   0   1   1    1.50    0.30
  -1  -1  -1  490.45   11.30
  -1  -1  -1  491.35   11.30
  -1  -1  -1  480.35   11.10
   1   1   1  484.85   12.20
   1   1   1  458.75   12.10
   1   1   1  473.65   11.30
   1   1   1  482.45   11.10
  -2  -1  -1 4869.91  114.09
  -2  -1  -1 5078.09  114.29
   2   1   1 4956.10  114.09
   2   1   1 4940.81  113.29
   2   1   1 4907.61  122.59
  -3  -1  -1   13.40    1.20
  -3  -1  -1   12.60    1.00
   3   1   1   12.10    0.90
   3   1   1   10.70    1.30
   3   1   1   11.40    0.80
  -4  -1  -1  965.20   22.70
  -4  -1  -1  997.20   22.60
   4   1   1  988.70   22.60
   4   1   1  924.71   24.50
   4   1   1  953.50   22.30
  -5  -1  -1  296.97    7.70
  -5  -1  -1  307.57    7.60
   5   1   1  284.27    8.80
   5   1   1  293.57    7.70
  -6  -1  -1   61.49    2.70
  -6  -1  -1   59.29    2.80
   6   1   1   56.29    4.00
   6   1   1   63.99    2.90
  -7  -1  -1   49.10    2.70
  -7  -1  -1   49.00    2.80
   7   1   1   50.89    2.90
   7   1   1   51.39    4.20
  -8  -1  -1    2.30    1.50
  -8  -1  -1    4.20    1.40
   8   1   1    6.60    2.50
   8   1   1    4.90    1.60
  -9  -1  -1    9.00    1.80
   9   1   1    8.10    1.80
   9   1   1    5.70    2.60
 -10  -1  -1   19.50    2.30
  10   1   1   20.20    3.60
 -11  -1  -1  228.58    7.20
  11   1   1  210.28   10.00
  11  -2  -1   14.00    3.20
  11  -2  -1   12.90    3.10
  10  -2  -1  404.26   13.20
 -10   2   1  429.06   10.80
   9  -2  -1    0.30    2.10
  -9   2   1    0.30    1.50
  -9   2   1    2.00    1.10
   8  -2  -1  524.35   14.90
  -8   2   1  526.75   12.90
  -8   2   1  522.65   12.80
   7  -2  -1  340.87   10.10
  -7   2   1  332.57    8.60
  -7   2   1  340.97    8.50
   6  -2  -1    6.00    1.50
  -6   2   1    6.10    1.10
  -6   2   1    6.40    1.00
   5  -2  -1  331.07    9.30
  -5   2   1  345.27    8.30
  -5   2   1  338.87    8.30
   4  -2  -1   54.59    2.40
  -4   2   1   57.29    2.10
  -4   2   1   59.99    2.10
   3  -2  -1  449.66   11.20
   3  -2  -1  438.66   10.30
  -3   2   1  444.26   10.50
  -3   2   1  434.66   10.50
  -3   2   1  433.86   11.20
   2  -2  -1  332.37    7.90
   2  -2  -1  326.37    7.90
   2  -2  -1  344.07    8.30
  -2   2   1  318.97    7.90
  -2   2   1  324.57    8.20
  -2   2   1  323.47    7.90
   1  -2  -1 1327.17   30.30
   1  -2  -1 1343.67   30.30
   1  -2  -1 1280.47   33.10
  -1   2   1 1329.57   30.30
  -1   2   1 1328.27   30.40
   0  -2  -1   19.40    1.00
   0  -2  -1   19.60    1.00
   0  -2  -1   20.40    1.10
   0   2   1   17.60    1.00
   0   2   1   19.70    1.00
   0   2   1   21.50    1.20
   0   2   1   20.30    1.10
   0   2   1   18.30    1.00
  -1  -2  -1 1455.95   33.30
  -1  -2  -1 1433.46   36.60
  -1  -2  -1 1511.15   33.50
   1   2   1 1444.06   33.30
   1   2   1 1433.66   33.10
   1   2   1 1451.85   36.80
   1   2   1 1411.66   35.40
  -2  -2  -1  769.02   17.70
  -2  -2  -1  743.03   17.80
  -2  -2  -1  801.32   18.00
   2   2   1  754.12   19.20
   2   2   1  757.82   17.60
   2   2   1  761.12   17.90
   2   2   1  767.62   19.40
  -3  -2  -1 1122.89   26.40
  -3  -2  -1 1152.08   26.30
   3   2   1 1133.89   26.10
   3   2   1 1154.68   26.20
   3   2   1 1102.29   28.30
  -4  -2  -1   59.99    2.50
  -4  -2  -1   61.69    2.40
   4   2   1   55.49    2.30
   4   2   1   55.19    3.20
   4   2   1   59.79    2.10
  -5  -2  -1  383.76    9.70
  -5  -2  -1  380.56    9.60
   5   2   1  376.56    9.50
   5   2   1  383.56   11.00
  -6  -2  -1   63.39    3.10
  -6  -2  -1   61.19    2.80
   6   2   1   58.49    4.00
   6   2   1   63.59    2.80
  -7  -2  -1   84.89    3.70
  -7  -2  -1   81.49    3.50
   7   2   1   85.09    3.50
   7   2   1   88.39    5.10
  -8  -2  -1   13.40    1.70
  -8  -2  -1   12.70    1.80
   8   2   1   13.40    2.90
   8   2   1   17.10    1.90
  -9  -2  -1    7.00    1.90
   9   2   1    4.40    1.80
   9   2   1    7.10    2.80
 -10  -2  -1  190.88    6.40
  10   2   1  177.38    8.50
  11  -3  -1  166.68    7.90
 -11   3   1  167.78    5.90
  10  -3  -1   31.10    3.60
 -10   3   1   31.40    2.40
   9  -3  -1  131.79    6.10
  -9   3   1  128.39    4.40
  -9   3   1  132.99    4.70
   8  -3  -1   41.10    3.30
  -8   3   1   42.20    2.60
  -8   3   1   39.50    2.90
   7  -3  -1   43.60    3.40
  -7   3   1   40.90    2.70
  -7   3   1   44.00    2.50
   6  -3  -1  662.23   17.10
  -6   3   1  646.34   15.50
  -6   3   1  635.04   15.50
   5  -3  -1  112.99    3.90
  -5   3   1  103.89    3.30
  -5   3   1   99.39    3.40
   4  -3  -1   48.10    1.80
   4  -3  -1   48.10    2.30
  -4   3   1   46.70    2.10
  -4   3   1   49.99    2.20
  -4   3   1   44.30    2.20
   3  -3  -1   15.00    1.30
   3  -3  -1   14.90    1.30
  -3   3   1   14.60    1.20
  -3   3   1    9.40    1.00
   2  -3  -1 2071.49   50.79
   2  -3  -1 2088.79   47.70
  -2   3   1 2105.99   47.80
  -2   3   1 2068.09   47.80
   1  -3  -1   16.00    1.60
  -1   3   1   16.30    1.50
   0  -3  -1   43.50    1.70
   0  -3  -1   43.40    2.00
   0  -3  -1   46.30    1.90
   0  -3  -1   43.10    1.80
   0   3   1   42.40    1.80
   0   3   1   46.40    2.00
   0   3   1   45.00    1.70
   0   3   1   43.00    1.90
  -1  -3  -1   70.09    2.60
  -1  -3  -1   75.59    2.50
  -1  -3  -1   78.49    2.40
  -1  -3  -1   77.09    2.30
   1   3   1   75.69    2.50
   1   3   1   74.29    2.30
   1   3   1   74.59    2.80
   1   3   1   76.49    2.50
  -2  -3  -1  232.98    5.80
  -2  -3  -1  239.48    6.10
   2   3   1  232.68    5.80
   2   3   1  227.88    6.70
   2   3   1  237.18    6.10
   2   3   1  230.28    6.30
  -3  -3  -1   47.80    2.10
  -3  -3  -1   45.70    1.90
  -3  -3  -1   47.80    2.10
   3   3   1   41.60    1.80
   3   3   1   47.70    2.10
   3   3   1   41.50    2.80
   3   3   1   42.80    2.00
  -4  -3  -1  276.47    7.10
  -4  -3  -1  269.97    7.10
   4   3   1  268.47    6.80
   4   3   1  262.97    6.80
   4   3   1  266.77    8.10
  -5  -3  -1   66.29    2.90
  -5  -3  -1   63.09    2.70
   5   3   1   60.69    3.80
   5   3   1   62.89    2.50
   5   3   1   61.79    2.20
  -6  -3  -1  310.07    8.40
  -6  -3  -1  319.87    8.60
   6   3   1  319.07   10.00
   6   3   1  317.67    8.20
  -7  -3  -1   16.20    1.80
  -7  -3  -1   17.10    2.00
   7   3   1   17.50    2.80
   7   3   1   20.20    1.80
  -8  -3  -1    6.80    1.90
   8   3   1    5.40    1.60
   8   3   1    6.10    2.60
  -9  -3  -1  376.66   10.50
   9   3   1  388.66   10.30
   9   3   1  379.16   12.90
 -10  -3  -1   -0.90    2.00
  10   3   1    1.50    3.00
  11  -4  -1    3.60    2.80
 -11   4   1    0.10    2.00
  10  -4  -1  369.06   12.30
 -10   4   1  387.36   10.30
   9  -4  -1    2.10    2.20
  -9   4   1    2.80    1.80
   8  -4  -1  123.89    5.60
  -8   4   1  134.59    4.50
  -8   4   1  126.09    4.70
   7  -4  -1   44.60    3.30
  -7   4   1   39.80    2.80
  -7   4   1   42.50    2.70
   6  -4  -1  129.19    4.60
  -6   4   1  111.09    4.00
  -6   4   1  112.49    3.90
   5  -4  -1  184.98    4.80
   5  -4  -1  183.18    5.60
  -5   4   1  186.58    5.20
  -5   4   1  181.78    5.40
  -5   4   1  169.18    5.20
   4  -4  -1   25.50    1.80
   4  -4  -1   21.50    1.70
  -4   4   1   25.50    2.00
  -4   4   1   29.80    1.80
  -4   4   1   23.30    2.10
   3  -4  -1 1484.55   36.10
   3  -4  -1 1497.05   34.20
  -3   4   1 1452.05   36.00
  -3   4   1 1446.76   34.30
  -3   4   1 1519.35   34.30
  -2   4   1   10.20    1.10
   1  -4  -1  236.58    6.70
   1  -4  -1  233.38    6.30
   1  -4  -1  245.38    6.30
  -1   4   1  243.28    6.30
   0  -4  -1   79.19    2.60
   0  -4  -1   82.29    2.70
   0  -4  -1   83.59    2.90
   0  -4  -1   82.69    2.80
   0   4   1   80.29    2.60
   0   4   1   76.59    2.60
  -1  -4  -1    5.20    0.90
  -1  -4  -1    4.90    0.90
  -1  -4  -1    5.60    0.70
  -1  -4  -1    5.70    1.00
   1   4   1    4.00    1.00
   1   4   1    5.40    0.80
   1   4   1    5.00    0.90
   1   4   1    5.00    0.70
  -2  -4  -1  891.41   21.60
  -2  -4  -1  938.01   21.60
  -2  -4  -1  942.81   21.40
   2   4   1  901.41   23.10
   2   4   1  899.21   23.20
   2   4   1  924.11   21.60
   2   4   1  920.61   21.30
  -3  -4  -1  233.28    6.00
  -3  -4  -1  230.18    6.20
  -3  -4  -1  243.78    6.30
   3   4   1  226.38    6.20
   3   4   1  230.18    5.90
   3   4   1  226.58    7.10
   3   4   1  226.38    6.40
  -4  -4  -1  262.87    6.90
  -4  -4  -1  254.07    6.80
   4   4   1  250.37    6.70
   4   4   1  246.78    7.90
   4   4   1  245.48    6.50
   4   4   1  260.97    7.20
  -5  -4  -1  480.05   11.90
  -5  -4  -1  487.75   12.00
   5   4   1  473.05   12.90
   5   4   1  474.15   11.50
   5   4   1  466.15   11.60
   5   4   1  467.65   13.40
  -6  -4  -1   22.10    1.90
  -6  -4  -1   22.50    2.00
   6   4   1   22.50    1.70
   6   4   1   17.20    2.50
  -7  -4  -1  159.18    5.30
  -7  -4  -1  161.28    5.80
   7   4   1  163.48    7.10
   7   4   1  169.98    5.20
  -8  -4  -1  270.67    8.20
   8   4   1  269.67   10.00
   8   4   1  273.47    7.70
  -9  -4  -1   -6.60    1.90
   9   4   1    0.70    2.80
 -10  -4  -1  128.49    5.70
  10   4   1  133.39    8.10
  11  -5  -1  245.88   10.00
 -11   5   1  265.87    8.10
  10  -5  -1   27.40    3.50
 -10   5   1   34.20    2.80
   9  -5  -1   14.60    2.70
  -9   5   1   11.90    2.10
   8  -5  -1   53.09    4.10
  -8   5   1   52.19    3.60
  -8   5   1   61.39    3.30
   7  -5  -1  100.09    4.50
  -7   5   1   98.79    3.90
  -7   5   1   96.99    4.10
   6  -5  -1    1.20    1.40
   6  -5  -1    1.30    0.90
  -6   5   1    1.70    1.30
  -6   5   1   -0.50    1.30
   5  -5  -1  697.23   16.10
   5  -5  -1  631.74   17.30
  -5   5   1  703.63   16.40
  -5   5   1  672.73   17.10
  -5   5   1  664.13   16.30
   4  -5  -1 2198.58   53.19
   4  -5  -1 2210.08   50.19
  -4   5   1 2122.79   52.99
  -4   5   1 2112.69   50.39
  -4   5   1 2263.87   50.39
   3  -5  -1  102.69    3.40
   3  -5  -1  100.19    2.90
  -3   5   1  105.79    3.50
  -3   5   1   94.29    3.50
  -3   5   1  101.09    2.90
   2  -5  -1  125.69    3.90
  -2   5   1  119.29    3.90
  -2   5   1  124.49    3.90
  -2   5   1  116.29    3.30
   1  -5  -1  318.97    8.60
   1  -5  -1  321.17    8.10
   1  -5  -1  312.97    8.10
  -1   5   1  310.27    8.10
   0  -5  -1   16.20    1.30
   0  -5  -1   16.70    1.60
   0  -5  -1   18.40    1.40
   0   5   1   14.30    1.20
   0   5   1   15.40    1.20
  -1  -5  -1 1612.14   36.00
  -1  -5  -1 1564.54   36.20
  -1  -5  -1 1526.05   39.00
  -1  -5  -1 1589.94   36.20
   1   5   1 1505.85   35.90
   1   5   1 1575.24   38.90
   1   5   1 1530.45   36.20
  -2  -5  -1    1.40    0.90
  -2  -5  -1    2.40    0.90
  -2  -5  -1    0.50    1.00
   2   5   1    0.10    0.90
   2   5   1    1.50    0.70
   2   5   1    1.60    0.80
   2   5   1    1.70    1.20
  -3  -5  -1 1225.18   28.00
  -3  -5  -1 1179.88   27.70
   3   5   1 1185.78   30.00
   3   5   1 1207.38   28.00
   3   5   1 1170.88   27.60
   3   5   1 1160.78   30.00
  -4  -5  -1  675.63   16.40
  -4  -5  -1  704.43   16.70
  -4  -5  -1  685.43   16.60
   4   5   1  680.03   18.20
   4   5   1  691.63   17.70
   4   5   1  674.63   16.50
   4   5   1  665.53   16.20
  -5  -5  -1  166.18    5.10
  -5  -5  -1  165.98    5.20
   5   5   1  159.38    6.30
   5   5   1  152.38    4.70
   5   5   1  168.88    5.20
   5   5   1  151.38    4.70
  -6  -5  -1  595.94   14.60
  -6  -5  -1  564.24   14.50
   6   5   1  587.94   16.40
   6   5   1  563.24   14.10
   6   5   1  569.94   15.70
  -7  -5  -1  423.06   11.60
  -7  -5  -1  413.76   11.40
   7   5   1  427.76   13.30
   7   5   1  415.06   10.80
   7   5   1  433.36   12.30
  -8  -5  -1    3.50    2.10
   8   5   1    4.30    2.80
   8   5   1    4.80    1.60
  -9  -5  -1  217.48    7.40
   9   5   1  209.78    9.30
 -10  -5  -1   64.19    4.70
  10   5   1   60.09    5.60
  11  -6  -1   27.30    3.80
 -11   6   1   36.50    3.10
  10  -6  -1    2.50    2.50
 -10   6   1   -4.00    2.10
   9  -6  -1    0.30    2.20
  -9   6   1    4.10    2.10
   8  -6  -1    0.10    1.90
  -8   6   1   -1.00    1.60
  -8   6   1   -0.60    1.90
   7  -6  -1   85.19    4.20
  -7   6   1   91.69    3.90
  -7   6   1   77.39    4.10
   6  -6  -1  144.59    4.30
   6  -6  -1  134.09    4.90
  -6   6   1  147.89    4.80
  -6   6   1  132.39    4.90
   5  -6  -1  311.77    8.40
   5  -6  -1  304.07    8.00
  -5   6   1  308.07    8.20
  -5   6   1  314.57    8.40
  -5   6   1  299.17    8.30
   4  -6  -1   15.40    1.60
   4  -6  -1   17.20    1.40
  -4   6   1   16.20    1.60
  -4   6   1   18.50    1.70
  -4   6   1   17.50    1.40
   3  -6  -1   65.49    3.00
  -3   6   1   66.59    3.10
  -3   6   1   67.29    3.10
   2  -6  -1   19.40    1.70
   2  -6  -1   16.50    1.50
  -2   6   1   20.50    1.70
  -2   6   1   17.30    1.10
   1  -6  -1   40.60    2.20
   1  -6  -1   40.00    2.50
  -1   6   1   33.50    2.40
   0  -6  -1  798.32   20.70
   0  -6  -1  850.91   19.60
   0   6   1  799.02   19.40
   0   6   1  820.12   19.60
  -1  -6  -1    2.00    0.80
  -1  -6  -1    1.20    1.20
  -1  -6  -1    1.30    1.00
   1   6   1    3.00    1.00
   1   6   1    0.20    1.00
   1   6   1    2.10    0.70
  -2  -6  -1  889.41   20.50
  -2  -6  -1  861.61   20.70
  -2  -6  -1  880.51   20.70
   2   6   1  861.41   21.70
   2   6   1  863.11   20.60
   2   6   1  850.21   20.30
   2   6   1  831.92   22.00
  -3  -6  -1  546.55   13.30
  -3  -6  -1  532.65   12.90
   3   6   1  524.15   13.10
   3   6   1  518.95   12.80
   3   6   1  535.75   13.80
   3   6   1  506.35   14.30
  -4  -6  -1  113.29    4.00
  -4  -6  -1   94.29    3.50
  -4  -6  -1  110.09    4.10
   4   6   1  110.19    3.60
   4   6   1  110.39    3.90
   4   6   1  112.39    3.70
   4   6   1  107.49    4.90
  -5  -6  -1  734.53   17.50
  -5  -6  -1  708.63   17.50
   5   6   1  705.23   17.20
   5   6   1  703.93   19.30
   5   6   1  698.03   17.00
   5   6   1  692.33   18.50
  -6  -6  -1  534.75   13.60
  -6  -6  -1  516.85   13.60
   6   6   1  531.85   13.10
   6   6   1  525.15   15.40
   6   6   1  523.95   14.40
  -7  -6  -1    4.30    1.90
   7   6   1    8.40    1.70
   7   6   1    5.30    1.50
   7   6   1    5.60    2.70
  -8  -6  -1  153.58    6.20
   8   6   1  150.68    5.10
   8   6   1  148.99    7.70
  -9  -6  -1    6.10    2.30
   9   6   1    4.20    3.30
 -10  -6  -1    6.60    2.50
  10   6   1    0.00    3.50
 -11   7   1    4.00    2.50
  10  -7  -1    8.40    2.60
 -10   7   1   10.20    2.50
   9  -7  -1    6.10    2.30
  -9   7   1    7.50    2.40
   8  -7  -1   77.59    4.40
  -8   7   1   80.79    4.50
   7  -7  -1   43.60    3.10
  -7   7   1   44.20    3.40
  -7   7   1   38.50    3.60
   6  -7  -1  328.87    8.80
   6  -7  -1  347.87    9.20
  -6   7   1  354.66    9.30
  -6   7   1  311.47    9.00
  -6   7   1  322.17    9.20
   5  -7  -1  166.78    5.30
   5  -7  -1  172.08    5.00
   5  -7  -1  179.08    5.90
  -5   7   1  171.18    4.90
  -5   7   1  161.48    5.60
  -5   7   1  178.08    5.60
   4  -7  -1  115.99    3.60
   4  -7  -1  127.59    4.60
   4  -7  -1  124.09    4.30
  -4   7   1  112.79    4.40
  -4   7   1  121.39    3.50
  -4   7   1  128.49    4.50
   3  -7  -1    3.90    1.20
   3  -7  -1    4.20    1.40
  -3   7   1    5.60    1.50
   2  -7  -1    2.70    1.40
   2  -7  -1    4.20    1.40
   2  -7  -1    6.50    1.40
  -2   7   1    5.50    1.40
  -2   7   1    5.60    0.80
   1  -7  -1 1647.24   41.20
   1  -7  -1 1632.64   38.10
   1  -7  -1 1648.54   38.20
  -1   7   1 1593.84   38.10
   0  -7  -1    7.40    1.00
   0  -7  -1    6.50    1.30
   0  -7  -1    6.20    1.50
   0   7   1    6.80    1.40
   0   7   1    7.00    1.30
  -1  -7  -1 2465.95   56.89
  -1  -7  -1 2483.95   61.29
   1   7   1 2409.96   56.49
   1   7   1 2458.65   56.79
  -2  -7  -1  506.95   12.80
   2   7   1  495.05   12.60
   2   7   1  497.35   13.60
   2   7   1  503.65   12.40
  -3  -7  -1    3.70    1.20
  -3  -7  -1    3.30    1.50
   3   7   1    4.60    1.20
   3   7   1    4.00    1.70
   3   7   1    4.90    1.20
   3   7   1    6.40    0.90
  -4  -7  -1  457.85   11.60
  -4  -7  -1  433.26   11.60
   4   7   1  445.66   11.40
   4   7   1  436.96   11.80
   4   7   1  431.06   12.70
   4   7   1  443.56   11.10
  -5  -7  -1  166.08    5.40
  -5  -7  -1  159.18    5.60
  -5  -7  -1  144.89    4.90
   5   7   1  169.08    5.30
   5   7   1  166.08    6.80
   5   7   1  159.78    4.90
   5   7   1  158.08    5.10
  -6  -7  -1    4.50    1.80
   6   7   1    1.90    1.30
   6   7   1    1.90    1.40
   6   7   1    5.20    2.50
  -7  -7  -1  150.38    6.00
   7   7   1  153.28    5.00
   7   7   1  153.78    7.50
  -8  -7  -1    5.90    2.30
   8   7   1   -1.40    2.80
  -9  -7  -1    0.60    2.40
   9   7   1   -2.90    3.30
 -11   8   1   -0.80    2.60
  10  -8  -1   16.20    2.80
 -10   8   1   15.10    2.80
   9  -8  -1   39.50    3.70
  -9   8   1   28.50    3.00
   8  -8  -1    5.70    1.80
  -8   8   1    5.60    2.20
   7  -8  -1  281.07    8.00
  -7   8   1  254.87    8.20
   6  -8  -1   72.09    3.00
   6  -8  -1   60.49    3.40
  -6   8   1   71.79    3.90
  -6   8   1   57.59    4.00
  -6   8   1   68.79    2.90
   5  -8  -1  141.09    4.90
   5  -8  -1  131.29    4.10
  -5   8   1  143.59    4.10
  -5   8   1  150.68    5.20
  -5   8   1  129.59    5.10
   4  -8  -1   19.70    2.00
   4  -8  -1   19.20    1.90
  -4   8   1   21.20    2.10
   3  -8  -1  358.86    9.70
   3  -8  -1  367.46    9.90
  -3   8   1  353.26    9.80
   2  -8  -1  462.75   11.70
   2  -8  -1  443.96   12.30
   2  -8  -1  440.26   11.60
  -2   8   1  449.46   11.40
  -2   8   1  438.36   11.70
   1  -8  -1   18.80    2.00
   1  -8  -1   23.60    2.20
   1  -8  -1   25.10    2.40
  -1   8   1   19.70    2.00
   0  -8  -1 1084.49   25.30
   0  -8  -1 1032.20   26.90
   0  -8  -1 1064.69   25.50
   0   8   1 1069.49   25.40
   0   8   1 1048.80   25.20
  -1  -8  -1  157.28    5.40
  -1  -8  -1  161.48    5.20
  -1  -8  -1  172.58    4.90
   1   8   1  153.28    5.00
   1   8   1  157.48    5.30
  -2  -8  -1  241.58    6.70
  -2  -8  -1  216.48    7.00
   2   8   1  233.28    6.80
   2   8   1  235.18    6.50
   2   8   1  227.48    7.40
  -3  -8  -1  599.64   14.80
  -3  -8  -1  594.24   15.20
   3   8   1  597.04   14.70
   3   8   1  606.94   15.00
   3   8   1  594.34   16.30
  -4  -8  -1  262.67    7.60
  -4  -8  -1  254.97    7.20
  -4  -8  -1  249.28    7.70
   4   8   1  253.17    7.00
   4   8   1  256.37    7.50
   4   8   1  251.47    8.70
  -5  -8  -1   42.90    3.60
  -5  -8  -1   41.40    3.20
  -5  -8  -1   34.70    2.70
   5   8   1   37.30    2.50
   5   8   1   37.40    2.90
   5   8   1   36.80    2.80
   5   8   1   37.10    3.50
  -6  -8  -1   80.29    4.50
   6   8   1   76.09    3.50
   6   8   1   70.19    3.30
   6   8   1   68.69    5.70
  -7  -8  -1    5.00    2.20
   7   8   1    4.80    1.60
   7   8   1    1.70    2.90
  -8  -8  -1   10.10    2.50
   8   8   1    7.70    3.40
  -9  -8  -1    8.20    2.80
   9   8   1    2.40    3.50
 -11   9   1    6.20    3.00
 -10   9   1    2.60    2.60
   9  -9  -1   24.50    2.50
  -9   9   1   20.90    3.00
   8  -9  -1   51.79    3.40
  -8   9   1   55.99    4.60
   7  -9  -1  220.28    6.50
  -7   9   1  206.88    7.30
   6  -9  -1    3.50    1.70
  -6   9   1    5.90    1.90
  -6   9   1    1.80    2.00
   5  -9  -1   55.29    3.50
  -5   9   1   62.19    4.00
   4  -9  -1  434.76   11.30
  -4   9   1  409.66   11.40
   3  -9  -1  197.88    6.50
   3  -9  -1  188.58    6.90
   3  -9  -1  218.98    6.60
  -3   9   1  209.78    5.50
  -3   9   1  190.78    6.60
   2  -9  -1   40.00    3.50
   2  -9  -1   45.80    3.10
   2  -9  -1   45.90    3.00
  -2   9   1   39.50    3.40
  -2   9   1   44.70    2.10
   1  -9  -1 2013.20   46.70
   1  -9  -1 1959.20   50.29
   1  -9  -1 2058.79   46.70
  -1   9   1 1941.81   46.70
   0  -9  -1   76.99    3.00
   0  -9  -1   85.09    4.10
   0  -9  -1   82.99    3.70
   0   9   1   82.89    3.90
   0   9   1   75.59    3.60
  -1  -9  -1  515.55   12.90
  -1  -9  -1  496.25   13.10
  -1  -9  -1  501.35   13.10
   1   9   1  502.45   13.00
   1   9   1  489.45   12.70
  -2  -9  -1  443.96   12.00
  -2  -9  -1  451.35   11.70
   2   9   1  449.56   12.60
   2   9   1  441.36   11.50
   2   9   1  451.45   11.80
  -3  -9  -1  189.88    6.60
  -3  -9  -1  208.38    6.10
   3   9   1  199.48    5.90
   3   9   1  192.48    6.30
   3   9   1  191.08    7.10
  -4  -9  -1  246.78    7.20
   4   9   1  249.28    7.50
   4   9   1  254.47    8.70
   4   9   1  241.48    7.10
  -5  -9  -1   84.39    3.80
  -5  -9  -1   87.19    4.70
   5   9   1   83.49    3.80
   5   9   1   90.19    5.60
  -6  -9  -1   32.10    2.90
   6   9   1   32.80    2.90
   6   9   1   34.10    4.00
  -7  -9  -1   27.30    3.00
   7   9   1   24.60    2.20
   7   9   1   28.20    4.00
  -8  -9  -1    6.80    2.60
   8   9   1    1.40    3.20
  -9  -9  -1    9.30    3.00
   9   9   1    6.70    3.80
 -10  10   1    2.30    2.80
  -9  10   1   10.60    2.80
   8 -10  -1  271.07    7.80
  -8  10   1  253.67    8.80
   7 -10  -1   63.99    3.10
  -7  10   1   58.99    4.80
   6 -10  -1   94.99    4.50
  -6  10   1   89.09    5.10
   5 -10  -1  514.35   13.30
  -5  10   1  491.55   13.50
   4 -10  -1  416.16   11.20
  -4  10   1  398.76   11.30
   3 -10  -1    6.20    1.90
   3 -10  -1    7.30    1.90
  -3  10   1   11.30    1.10
  -3  10   1    6.90    2.00
   2 -10  -1 1720.93   39.60
   2 -10  -1 1645.14   42.50
   2 -10  -1 1663.03   39.40
  -2  10   1 1668.83   40.90
  -2  10   1 1627.64   39.50
   1 -10  -1   21.40    1.90
   1 -10  -1   21.10    2.20
   1 -10  -1   23.50    2.30
  -1  10   1   15.30    2.10
   0 -10  -1   85.79    4.00
   0 -10  -1   86.79    4.30
   0 -10  -1   77.09    3.10
   0  10   1   78.49    3.80
   0  10   1   82.19    4.20
  -1 -10  -1   75.49    3.90
  -1 -10  -1   74.09    4.30
   1  10   1   72.49    3.70
   1  10   1   70.99    4.10
   1  10   1   73.39    3.90
  -2 -10  -1    9.70    1.80
  -2 -10  -1    8.70    2.20
   2  10   1    8.10    2.00
   2  10   1    8.70    1.70
   2  10   1    8.40    1.90
  -3 -10  -1   60.39    3.40
  -3 -10  -1   60.39    4.20
   3  10   1   55.19    3.70
   3  10   1   51.49    4.40
   3  10   1   59.39    3.30
  -4 -10  -1  204.28    6.40
   4  10   1  197.08    6.70
   4  10   1  195.98    6.20
   4  10   1  194.38    7.70
  -5 -10  -1   28.90    2.40
  -5 -10  -1   21.90    2.70
   5  10   1   27.80    2.30
   5  10   1   23.30    3.20
  -6 -10  -1   60.29    4.90
   6  10   1   56.59    4.80
   6  10   1   57.49    3.50
  -7 -10  -1    2.20    2.40
   7  10   1   -3.20    3.00
  -8 -10  -1   33.50    3.60
   8  10   1   28.30    4.30
 -10  11   1   -0.60    3.00
  -9  11   1  356.76   11.30
  -8  11   1   14.70    3.00
  -7  11   1  185.98    7.40
   6 -11  -1  393.36   11.00
  -6  11   1  379.86   11.30
   5 -11  -1   32.70    2.80
  -5  11   1   33.70    3.10
   4 -11  -1  175.78    6.60
   4 -11  -1  181.18    7.10
  -4  11   1  191.28    6.90
   3 -11  -1 1068.89   28.80
   3 -11  -1 1106.29   26.70
  -3  11   1 1106.29   27.10
  -3  11   1 1084.49   26.80
   2 -11  -1   32.70    3.30
   2 -11  -1   31.70    2.80
  -2  11   1   47.00    3.90
  -2  11   1   38.90    2.30
   1 -11  -1  242.48    7.40
   1 -11  -1  256.57    8.00
  -1  11   1  245.28    7.90
   0 -11  -1   31.00    2.30
   0 -11  -1   37.70    3.30
   0 -11  -1   44.80    3.90
   0  11   1   30.50    2.70
   0  11   1   31.70    2.60
  -1 -11  -1   16.30    2.20
  -1 -11  -1    9.60    2.20
   1  11   1   16.40    2.10
   1  11   1   11.60    2.10
   1  11   1   13.50    2.10
  -2 -11  -1   70.99    4.70
  -2 -11  -1   76.59    4.00
   2  11   1   75.39    4.70
   2  11   1   75.09    3.90
   2  11   1   75.49    4.40
  -3 -11  -1   20.00    2.30
  -3 -11  -1   14.10    2.50
   3  11   1   15.00    2.70
   3  11   1   18.80    2.10
   3  11   1   19.70    2.40
  -4 -11  -1    9.80    1.90
   4  11   1    0.90    2.50
   4  11   1    5.20    2.00
   4  11   1    7.00    1.80
  -5 -11  -1   -0.90    2.20
   5  11   1    1.20    2.60
   5  11   1    1.70    1.70
  -6 -11  -1   25.60    3.30
   6  11   1   19.40    3.50
   6  11   1   23.80    2.30
  -7 -11  -1   19.50    3.20
   7  11   1   16.00    3.90
  -8 -11  -1    5.60    3.10
   8  11   1    5.50    3.80
  10 -12  -1  220.78   11.30
 -10  12   1  236.58    9.50
  -9  12   1    3.10    3.00
  -8  12   1  119.39    6.70
  -7  12   1  303.37   10.00
   6 -12  -1  200.28    7.10
   6 -12  -1  184.78    8.20
  -6  12   1  184.08    7.50
   5 -12  -1  353.16   10.30
   5 -12  -1  337.27   11.40
  -5  12   1  336.77   10.60
   4 -12  -1  703.53   17.90
   4 -12  -1  673.43   19.20
  -4  12   1  673.23   18.00
   3 -12  -1   22.30    2.80
   3 -12  -1   24.50    2.70
  -3  12   1   20.20    1.90
  -3  12   1   20.50    2.80
   2 -12  -1   86.59    4.40
   2 -12  -1   86.29    5.10
  -2  12   1   84.99    5.10
   1 -12  -1   24.90    2.80
   1 -12  -1   27.00    2.20
  -1  12   1   31.90    3.10
   0 -12  -1   30.50    2.40
   0 -12  -1   27.10    2.90
   0  12   1   27.40    2.60
   0  12   1   25.30    2.70
  -1 -12  -1   18.80    2.60
   1  12   1   17.90    2.60
   1  12   1   17.10    2.30
   1  12   1   22.00    2.50
  -2 -12  -1    0.20    2.30
   2  12   1    4.30    1.90
   2  12   1    1.90    2.10
   2  12   1    3.00    2.20
  -3 -12  -1   32.20    2.90
  -3 -12  -1   29.20    3.30
   3  12   1   30.60    3.40
   3  12   1   32.50    2.90
   3  12   1   34.50    2.80
  -4 -12  -1   68.29    5.30
  -4 -12  -1   59.99    4.00
   4  12   1   61.99    3.80
   4  12   1   61.09    5.50
  -5 -12  -1    1.30    2.60
   5  12   1   -0.80    2.70
   5  12   1    3.40    1.80
  -6 -12  -1   16.20    3.20
   6  12   1   15.90    3.60
  -7 -12  -1    1.60    2.90
   7  12   1   -0.60    3.30
   9 -13  -1  158.98    9.50
  -9  13   1  184.18    8.50
   8 -13  -1   94.89    7.40
  -8  13   1   91.59    6.70
   7 -13  -1    2.80    3.40
  -7  13   1    7.60    3.00
   6 -13  -1   17.60    3.60
  -6  13   1   18.20    3.20
   5 -13  -1  117.99    6.10
   5 -13  -1  115.29    6.40
  -5  13   1  123.49    6.50
   4 -13  -1    7.80    2.80
   4 -13  -1    8.20    2.70
  -4  13   1   14.30    2.80
   3 -13  -1  166.78    7.10
   3 -13  -1  175.18    6.80
  -3  13   1  172.88    5.30
  -3  13   1  169.08    7.20
   2 -13  -1   56.69    5.20
   2 -13  -1   50.59    4.00
  -2  13   1   60.29    5.00
  -2  13   1   63.59    3.10
   1 -13  -1  274.27    9.30
   1 -13  -1  272.57    8.30
  -1  13   1  287.07    9.20
   0 -13  -1   14.20    2.80
   0 -13  -1   19.00    1.80
   0  13   1   17.50    2.30
   0  13   1   21.00    3.00
  -1 -13  -1    7.50    2.60
   1  13   1    5.80    2.10
   1  13   1    6.00    2.40
   1  13   1    6.00    2.20
  -2 -13  -1   57.29    5.20
   2  13   1   61.09    4.80
   2  13   1   51.29    4.80
   2  13   1   62.39    4.30
   3  13   1   27.40    2.70
   3  13   1   23.60    2.90
   3  13   1   17.70    3.10
  -4 -13  -1   -0.50    2.60
   4  13   1   -2.10    1.80
   4  13   1    0.50    2.70
  -5 -13  -1    8.90    3.20
   5  13   1   16.30    3.50
   5  13   1   10.70    2.20
  -6 -13  -1   19.10    3.60
   6  13   1   26.30    4.10
   9 -14  -1   52.79    5.80
  -9  14   1   51.69    4.90
   8 -14  -1    2.00    4.00
  -8  14   1    3.30    3.40
   7 -14  -1   30.10    4.40
  -7  14   1   27.10    3.80
   6 -14  -1   52.79    4.70
  -6  14   1   45.60    4.20
   5 -14  -1   48.50    3.90
   5 -14  -1   51.29    4.40
  -5  14   1   48.30    4.10
   4 -14  -1  215.68    8.30
   4 -14  -1  202.48    8.30
  -4  14   1  217.18    8.40
   3 -14  -1   78.79    5.90
   3 -14  -1   75.79    5.10
  -3  14   1   82.29    5.80
   2 -14  -1   16.60    2.40
   2 -14  -1   14.90    3.00
  -2  14   1   16.10    1.90
  -2  14   1   11.80    2.90
   1 -14  -1   62.09    3.70
   1 -14  -1   71.79    5.70
  -1  14   1   64.19    5.50
   0 -14  -1   12.00    1.80
   0 -14  -1    8.40    2.90
   0  14   1   15.50    2.50
   0  14   1   12.00    2.90
  -1 -14  -1    0.60    2.70
   1  14   1    1.60    2.50
   1  14   1    4.00    2.30
  -2 -14  -1   42.70    3.90
   2  14   1   49.60    4.00
   2  14   1   48.90    3.90
   2  14   1   48.30    4.30
   3  14   1   12.70    3.00
   3  14   1   16.90    2.60
  -4 -14  -1    2.10    3.00
   4  14   1    1.50    2.80
   4  14   1    3.20    2.10
  -5 -14  -1   88.89    6.70
   5  14   1   83.09    4.70
   5  14   1   80.89    6.80
  -6 -14  -1   10.00    3.50
   6  14   1   18.40    4.10
   8 -15  -1    5.00    4.00
  -8  15   1    6.90    3.70
   7 -15  -1    5.40    3.80
  -7  15   1   14.00    3.70
   6 -15  -1  200.68    9.30
  -6  15   1  215.38    9.10
   5 -15  -1   16.10    3.30
   5 -15  -1   15.80    3.50
  -5  15   1   12.90    3.40
   4 -15  -1   47.80    4.30
   4 -15  -1   48.30    4.30
  -4  15   1   54.59    4.40
   3 -15  -1   23.80    3.50
   3 -15  -1   16.00    2.90
  -3  15   1   14.40    3.30
   2 -15  -1   29.20    2.80
   2 -15  -1   31.30    3.80
  -2  15   1   28.90    3.80
  -2  15   1   31.10    2.50
   1 -15  -1   39.30    4.00
   1 -15  -1   52.89    3.50
  -1  15   1   46.00    3.90
  -1  15   1   40.50    4.00
   0 -15  -1  203.58    6.60
   0 -15  -1  198.88    8.60
   0  15   1  211.38    8.50
   0  15   1  192.98    7.30
  -1 -15  -1  125.09    7.20
   1  15   1  127.79    6.20
   1  15   1  125.29    6.90
  -2 -15  -1    9.00    3.20
   2  15   1    6.50    2.40
   2  15   1    4.80    2.90
   2  15   1    8.10    2.80
   3  15   1   18.60    2.80
   3  15   1   18.30    3.40
  -4 -15  -1   90.89    7.10
   4  15   1   85.39    5.10
   4  15   1   84.59    6.50
  -5 -15  -1   27.10    4.20
   5  15   1   26.90    4.20
   7 -16  -1   75.39    7.40
  -7  16   1   87.49    7.80
   6 -16  -1    3.80    3.50
  -6  16   1    6.80    3.60
   5 -16  -1  152.18    8.00
  -5  16   1  154.08    8.30
   4 -16  -1    0.00    2.80
   4 -16  -1   -1.90    3.20
  -4  16   1   -4.10    3.00
   3 -16  -1    6.80    3.30
   3 -16  -1    6.30    2.70
  -3  16   1    9.40    3.30
   2 -16  -1   11.30    3.40
   2 -16  -1    9.00    2.30
  -2  16   1   10.10    3.30
  -2  16   1    7.60    2.00
   1 -16  -1   10.40    3.40
  -1  16   1    7.90    2.30
  -1  16   1    6.70    3.20
   0 -16  -1   27.00    3.80
   0  16   1   29.80    3.10
   0  16   1   21.30    3.60
  -1 -16  -1  204.48    8.90
   1  16   1  190.78    8.60
   1  16   1  187.68    7.70
   2  16   1   83.59    6.00
   3  16   1  109.19    6.90
  -4 -16  -1    0.30    3.50
   4  16   1    4.30    3.30
   4  16   1    6.80    2.60
   7 -17  -1   19.90    4.50
  -7  17   1   16.00    4.40
   6 -17  -1  117.19    8.10
  -6  17   1  134.99    8.50
   5 -17  -1   -0.70    3.20
  -5  17   1   -3.20    3.40
   4 -17  -1   -0.50    3.40
   4 -17  -1   -2.50    2.90
  -4  17   1    3.10    3.40
   3 -17  -1   53.99    4.90
   3 -17  -1   46.70    4.80
  -3  17   1   45.40    4.60
   2 -17  -1    1.90    3.40
  -2  17   1   -4.20    3.10
   1 -17  -1  104.79    7.60
  -1  17   1   96.29    5.20
  -1  17   1   94.69    7.30
   0 -17  -1   49.20    4.80
   0  17   1   45.90    3.70
   0  17   1   44.60    4.80
  -1 -17  -1   55.49    4.90
   1  17   1   71.09    5.50
   1  17   1   67.39    5.20
   2  17   1   67.39    5.80
  -3 -17  -1   62.49    5.50
   3  17   1   70.89    6.30
   5 -18  -1    2.20    3.40
  -5  18   1    6.50    3.90
   4 -18  -1    2.70    3.80
   4 -18  -1    6.60    3.20
  -4  18   1    5.40    3.80
   3 -18  -1   39.00    4.80
  -3  18   1   47.30    5.20
   2 -18  -1  144.29    8.70
  -2  18   1  134.69    8.60
   1 -18  -1    4.60    3.60
  -1  18   1    0.00    3.60
   0 -18  -1  132.09    8.50
   0  18   1  132.39    8.50
   1  18   1   44.40    4.10
   2  18   1   -0.60    2.90
   3 -19  -1  223.38   10.50
  -3  19   1  228.68   10.90
   2 -19  -1    4.80    3.80
  -2  19   1    1.30    4.00
   1 -19  -1  186.08    9.70
  -1  19   1  173.88    9.90
   1  20  -2  122.39    7.20
   1  20  -2  120.99    7.30
  -1 -20   2  128.59    8.90
   0  20  -2   -4.30    4.00
   0 -20   2    0.60    4.00
  -1  20  -2   -1.90    3.70
   1 -20   2   -5.00    3.80
  -2  20  -2    0.30    3.70
   2 -20   2    1.80    3.90
  -3  20  -2   -3.80    3.70
   3 -20   2   -0.50    3.90
  -4  20  -2   27.10    4.70
   4 -20   2   27.40    4.90
   2  19  -2  164.18    8.10
   2  19  -2  151.88    7.80
  -2 -19   2  151.78    8.90
   1  19  -2   20.30    3.60
  -1 -19   2   14.00    4.00
   0  19  -2    5.20    3.10
   0  19  -2   -1.30    3.30
   0 -19   2    0.30    3.60
  -1  19  -2    1.20    3.40
   1 -19   2   -3.00    3.50
  -2  19  -2    3.80    3.60
   2 -19   2    6.50    3.70
  -3  19  -2  103.59    8.00
   3 -19   2   93.29    7.90
  -4  19  -2   12.40    4.20
   4 -19   2   19.50    3.60
   4 -19   2   15.40    4.00
  -5  19  -2  247.28   10.90
   5 -19   2  212.58    9.80
   4  18  -2    1.90    3.40
   4  18  -2    4.50    2.90
  -4 -18   2   10.20    3.80
   3  18  -2  307.67   10.50
   3  18  -2  306.87   11.50
  -3 -18   2  313.07   11.70
   2  18  -2   87.99    6.20
  -2 -18   2   80.89    7.50
   1  18  -2   -0.90    3.10
   1  18  -2    2.70    2.90
  -1 -18   2   -1.80    3.30
   0  18  -2    0.40    2.70
   0  18  -2   -0.10    3.10
   0 -18   2    2.00    3.30
  -1  18  -2    6.80    3.30
   1 -18   2   12.10    3.60
  -2  18  -2   49.90    4.70
   2 -18   2   51.69    4.90
  -3  18  -2   10.50    3.60
   3 -18   2   14.40    3.00
   3 -18   2    6.60    3.50
  -4  18  -2  417.66   13.80
   4 -18   2  427.36   13.70
   4 -18   2  408.86   13.60
  -5  18  -2    6.80    3.70
   5 -18   2    5.80    3.40
  -6  18  -2   69.19    5.60
   6 -18   2   73.39    7.10
   5  17  -2    9.80    2.90
   5  17  -2    8.80    3.70
  -5 -17   2    4.20    3.40
   4  17  -2   87.49    7.00
   4  17  -2   89.29    5.80
  -4 -17   2   79.59    7.00
   3  17  -2  124.29    6.40
   3  17  -2  122.79    7.20
  -3 -17   2  115.09    7.60
   2  17  -2   28.20    3.40
  -2 -17   2   26.80    3.80
   1  17  -2  104.99    6.10
   1  17  -2  106.69    6.80
  -1 -17   2   94.89    7.10
   0  17  -2  139.29    7.20
   0  17  -2  134.29    6.80
   0 -17   2  134.89    7.70
  -1  17  -2  106.79    6.80
  -1  17  -2  100.29    6.20
   1 -17   2   92.69    7.00
   1 -17   2   95.29    4.40
  -2  17  -2    4.60    3.00
   2 -17   2    2.70    2.30
   2 -17   2    3.70    3.10
  -3  17  -2  419.26   13.20
   3 -17   2  395.96   12.80
   3 -17   2  421.26   13.10
  -4  17  -2   -1.60    3.10
   4 -17   2   -2.50    3.00
   4 -17   2   -1.30    2.80
  -5  17  -2  118.79    7.60
   5 -17   2   96.39    7.20
  -6  17  -2  128.59    8.10
  -7  17  -2   64.49    5.50
   6  16  -2    2.10    3.40
   5  16  -2   52.79    5.00
   5  16  -2   56.99    5.00
  -5 -16   2   47.50    4.40
   4  16  -2  185.88    8.60
   4  16  -2  177.98    7.20
  -4 -16   2  168.28    8.10
   3  16  -2    4.20    2.50
  -3 -16   2    2.30    2.90
   2  16  -2   57.69    4.40
   2  16  -2   46.60    3.90
  -2 -16   2   42.90    4.20
   1  16  -2  409.86   12.30
   1  16  -2  429.06   12.70
  -1 -16   2  418.36   12.90
   0  16  -2  154.98    7.30
   0  16  -2  169.98    7.00
   0 -16   2  151.18    7.60
  -1  16  -2    5.10    2.00
  -1  16  -2    4.90    2.50
  -1  16  -2    4.00    2.80
   1 -16   2    7.00    1.90
   1 -16   2    5.00    3.00
  -2  16  -2  314.87   10.60
  -2  16  -2  316.57    9.40
   2 -16   2  299.37    9.80
   2 -16   2  307.07   10.50
  -3  16  -2   64.49    5.90
   3 -16   2   55.69    4.90
   3 -16   2   56.69    4.40
  -4  16  -2  355.06   11.80
   4 -16   2  358.46   11.60
  -5  16  -2  292.17   10.60
   5 -16   2  289.97   10.20
  -6  16  -2   41.60    4.40
  -7  16  -2   -0.40    3.40
  -8  16  -2   66.69    5.60
   6  15  -2   35.40    3.50
   6  15  -2   33.60    4.30
   5  15  -2  262.77    8.80
   5  15  -2  260.47   10.50
  -5 -15   2  265.27    9.60
   4  15  -2   24.00    3.60
   4  15  -2   24.20    3.00
  -4 -15   2   16.50    3.10
   3  15  -2  319.97   10.00
  -3 -15   2  321.37   10.60
   2  15  -2  243.58    8.50
   2  15  -2  234.68    8.20
  -2 -15   2  236.88    8.90
   1  15  -2   18.10    2.80
   1  15  -2   20.20    3.10
  -1 -15   2   18.20    3.10
   0  15  -2  121.39    6.10
   0  15  -2  120.59    5.90
   0 -15   2  115.09    4.00
   0 -15   2  118.09    4.00
   0 -15   2  115.89    6.40
  -1  15  -2  669.73   18.10
  -1  15  -2  693.63   18.40
  -1  15  -2  681.23   18.30
   1 -15   2  688.73   18.30
   1 -15   2  682.93   18.30
  -2  15  -2   12.50    1.90
  -2  15  -2    5.90    2.70
   2 -15   2   11.80    3.00
   2 -15   2   11.20    2.40
  -3  15  -2  271.07    8.20
  -3  15  -2  266.07    9.50
   3 -15   2  268.77    9.40
  -4  15  -2  126.99    5.00
  -4  15  -2  135.09    7.00
   4 -15   2  126.39    6.80
  -5  15  -2    1.40    2.90
   5 -15   2    0.30    2.70
  -6  15  -2   39.80    4.10
  -7  15  -2   87.49    6.90
  -8  15  -2   59.49    5.00
  -9  15  -2   31.80    4.50
   7  14  -2   -1.20    3.30
  -7 -14   2   -0.30    2.90
   6  14  -2  328.07   11.90
   6  14  -2  301.17    9.70
   5  14  -2    7.50    2.40
   5  14  -2    3.00    3.00
  -5 -14   2    4.30    2.70
   4  14  -2  434.86   13.80
   4  14  -2  441.26   12.40
  -4 -14   2  441.56   12.90
   3  14  -2  287.47    9.00
   3  14  -2  289.47    9.10
  -3 -14   2  280.77    9.60
   2  14  -2  153.28    6.10
   2  14  -2  144.89    6.20
  -2 -14   2  134.39    6.60
   1  14  -2  106.29    5.40
   1  14  -2   97.49    5.10
  -1 -14   2   95.39    5.70
   0  14  -2  515.65   14.30
   0  14  -2  521.05   14.20
   0 -14   2  521.75   14.40
   0 -14   2  528.25   13.70
   0 -14   2  521.35   13.70
  -1  14  -2    7.20    2.30
  -1  14  -2    4.20    1.60
  -1  14  -2    6.80    2.40
   1 -14   2    5.30    2.50
   1 -14   2    8.40    1.80
  -2  14  -2  602.54   16.30
  -2  14  -2  621.44   16.40
  -2  14  -2  606.34   16.50
   2 -14   2  625.54   16.50
  -3  14  -2   17.80    3.00
  -3  14  -2   23.60    2.10
   3 -14   2   20.80    3.00
  -4  14  -2    5.20    1.50
  -4  14  -2    3.50    2.60
   4 -14   2    0.70    2.40
  -5  14  -2   11.70    3.00
  -5  14  -2   21.30    2.10
   5 -14   2   15.20    2.80
  -6  14  -2  182.08    7.80
  -7  14  -2   80.09    6.20
  -8  14  -2   48.40    4.40
  -9  14  -2    7.50    3.50
   8  13  -2   12.00    4.20
  -8 -13   2   16.20    3.30
   7  13  -2  351.46   10.70
   7  13  -2  350.56   13.00
  -7 -13   2  372.76   11.30
   6  13  -2    0.40    2.90
   6  13  -2    1.60    2.00
   5  13  -2  128.59    5.60
   5  13  -2  138.59    7.20
  -5 -13   2  129.29    6.30
   4  13  -2   96.29    4.90
  -4 -13   2   89.19    5.60
   3  13  -2  203.58    6.90
   3  13  -2  197.08    6.90
  -3 -13   2  189.88    7.40
   2  13  -2   67.99    4.30
   2  13  -2   69.79    4.30
  -2 -13   2   67.49    5.00
   1  13  -2  348.47   10.20
   1  13  -2  352.86   10.10
  -1 -13   2  338.37   10.30
   0  13  -2   26.90    2.70
   0  13  -2   25.20    2.80
   0 -13   2   26.00    2.80
   0 -13   2   21.40    2.10
  -1  13  -2  564.54   15.10
  -1  13  -2  561.84   15.10
  -1  13  -2  556.44   14.90
   1 -13   2  584.94   15.10
   1 -13   2  544.35   15.20
  -2  13  -2   33.10    3.10
  -2  13  -2   27.80    2.80
  -2  13  -2   39.40    2.80
   2 -13   2   33.10    3.10
  -3  13  -2   35.00    3.20
  -3  13  -2   41.00    2.70
   3 -13   2   28.80    3.00
  -4  13  -2    2.00    2.30
  -4  13  -2    4.30    1.40
   4 -13   2    2.20    2.30
  -5  13  -2   10.20    1.70
  -5  13  -2    7.60    2.70
   5 -13   2    6.70    2.50
  -6  13  -2  152.68    7.00
  -6  13  -2  159.28    5.40
   6 -13   2  155.58    6.60
  -7  13  -2   88.49    6.10
   7 -13   2  100.49    4.60
  -8  13  -2   16.50    3.30
   8 -13   2   14.10    2.50
  -9  13  -2   -0.30    3.20
   8  12  -2  289.77   11.60
  -8 -12   2  278.97    9.50
   7  12  -2    3.50    2.20
   7  12  -2    1.00    3.20
  -7 -12   2    0.00    2.40
   6  12  -2  442.86   12.20
   6  12  -2  431.46   14.10
   5  12  -2    6.10    2.70
   5  12  -2   11.50    2.20
  -5 -12   2    9.90    2.40
   4  12  -2  220.78    7.20
   4  12  -2  214.08    7.00
  -4 -12   2  225.58    7.70
   3  12  -2  170.68    6.10
   3  12  -2  179.38    6.30
  -3 -12   2  180.38    6.70
   2  12  -2  344.07    9.80
   2  12  -2  344.97    9.80
  -2 -12   2  339.57   10.00
   1  12  -2   83.19    4.30
   1  12  -2   86.19    4.30
  -1 -12   2   84.99    4.70
   0  12  -2  256.17    7.90
   0  12  -2  251.57    7.80
   0 -12   2  241.78    8.00
   0 -12   2  257.37    7.10
  -1  12  -2  176.38    6.20
  -1  12  -2  171.08    6.30
   1 -12   2  176.58    6.40
  -2  12  -2   60.59    4.00
  -2  12  -2   57.89    4.20
  -2  12  -2   69.89    3.20
   2 -12   2   59.09    4.30
  -3  12  -2   -2.20    1.90
  -3  12  -2    1.20    1.10
   3 -12   2   -3.40    1.90
  -4  12  -2   76.69    3.40
  -4  12  -2   72.49    4.80
   4 -12   2   72.79    4.60
  -5  12  -2  112.59    5.80
  -5  12  -2  124.89    4.60
   5 -12   2  124.19    5.60
  -6  12  -2  153.58    6.80
  -6  12  -2  162.38    5.50
   6 -12   2  158.08    5.60
   6 -12   2  163.38    6.40
  -7  12  -2   19.10    3.20
   7 -12   2   22.60    2.40
  -8  12  -2    4.90    2.90
   8 -12   2    7.20    2.10
  -9  12  -2   14.40    3.40
 -10  12  -2   -3.50    3.20
   9  11  -2  238.28   10.80
  -9 -11   2  216.38    8.20
   8  11  -2    2.80    2.20
   8  11  -2   -1.00    3.00
  -8 -11   2    2.40    2.30
   7  11  -2  315.47   11.50
   7  11  -2  306.37    9.30
  -7 -11   2  303.17    9.50
   6  11  -2    3.70    1.90
   6  11  -2    2.60    2.70
  -6 -11   2    2.20    2.00
   5  11  -2    6.40    2.00
   5  11  -2    4.50    2.60
  -5 -11   2    6.20    1.80
  -5 -11   2    4.40    2.10
   4  11  -2    4.90    1.60
   4  11  -2    6.20    1.90
  -4 -11   2    7.00    2.10
  -4 -11   2    6.50    1.90
   3  11  -2  123.39    4.80
   3  11  -2  123.89    4.90
  -3 -11   2  124.49    4.90
  -3 -11   2  115.39    5.30
   2  11  -2    8.00    1.80
   2  11  -2    9.60    1.80
  -2 -11   2   11.10    1.90
  -2 -11   2    9.30    2.10
   1  11  -2  320.67    8.90
   1  11  -2  303.17    8.80
  -1 -11   2  321.87    9.00
  -1 -11   2  296.97    9.00
   0  11  -2  193.08    6.30
   0  11  -2  197.08    6.40
   0 -11   2  196.88    6.40
   0 -11   2  195.08    5.70
   0 -11   2  186.88    6.50
  -1  11  -2  305.07    8.90
  -1  11  -2  306.47    9.00
   1 -11   2  305.37    9.00
   1 -11   2  324.27    9.00
  -2  11  -2    9.00    2.00
  -2  11  -2    9.40    1.30
  -2  11  -2   11.90    2.00
   2 -11   2   10.30    2.10
  -3  11  -2   11.30    2.20
   3 -11   2   12.70    2.10
  -4  11  -2   75.09    4.50
   4 -11   2   76.79    4.40
  -5  11  -2   22.80    2.80
  -5  11  -2   30.90    2.50
   5 -11   2   24.50    2.10
   5 -11   2   23.50    2.60
  -6  11  -2  201.38    6.30
  -6  11  -2  185.58    7.20
   6 -11   2  192.18    6.30
   6 -11   2  196.28    6.80
  -7  11  -2   19.70    3.00
  -7  11  -2   26.10    2.30
   7 -11   2   26.40    2.50
  -8  11  -2   13.90    3.00
   8 -11   2   13.30    2.40
  -9  11  -2    3.30    3.00
   9 -11   2    4.60    2.40
 -10  11  -2   40.50    4.10
   9  10  -2    0.30    3.40
  -9 -10   2    4.70    2.40
   8  10  -2  298.37    9.00
   8  10  -2  298.07   11.30
  -8 -10   2  289.37    9.10
   7  10  -2   -0.90    1.80
   7  10  -2    0.00    2.70
  -7 -10   2   -0.90    2.00
   6  10  -2    5.00    1.90
   6  10  -2    4.20    2.70
  -6 -10   2    3.20    1.80
  -6 -10   2    1.90    1.90
   5  10  -2   28.30    2.60
   5  10  -2   26.20    2.50
   5  10  -2   26.10    3.10
  -5 -10   2   23.60    2.40
  -5 -10   2   24.50    2.40
   4  10  -2  103.09    4.30
   4  10  -2   92.79    3.90
  -4 -10   2   94.59    4.20
  -4 -10   2   96.89    4.10
  -4 -10   2  101.59    4.70
   3  10  -2   72.39    3.60
   3  10  -2   71.09    3.40
  -3 -10   2   68.19    3.50
  -3 -10   2   73.79    3.70
  -3 -10   2   68.79    3.90
   2  10  -2  327.67    9.20
   2  10  -2  324.77    9.20
  -2 -10   2  336.87    9.40
  -2 -10   2  355.76    9.40
   1  10  -2  145.09    5.00
   1  10  -2  143.49    5.00
  -1 -10   2  134.59    5.20
  -1 -10   2  152.78    5.20
   0  10  -2  469.75   12.50
   0  10  -2  475.75   12.50
   0 -10   2  481.55   12.60
   0 -10   2  503.65   12.60
  -1  10  -2    0.20    1.50
  -1  10  -2    1.10    1.40
   1 -10   2    3.30    1.50
   1 -10   2   -2.60    1.50
  -2  10  -2    1.30    1.50
  -2  10  -2   -0.30    0.50
  -2  10  -2    1.20    1.50
   2 -10   2    3.90    1.50
   2 -10   2    1.50    1.60
  -3  10  -2  111.89    4.80
   3 -10   2  117.39    4.70
   3 -10   2  111.79    4.60
  -4  10  -2  184.48    6.30
   4 -10   2  172.08    6.00
   4 -10   2  172.78    5.50
  -5  10  -2  236.58    7.80
  -5  10  -2  254.47    7.30
   5 -10   2  234.68    7.20
   5 -10   2  248.18    7.50
  -6  10  -2    5.70    2.30
  -6  10  -2   13.50    1.80
   6 -10   2   12.20    2.10
   6 -10   2   11.70    1.90
  -7  10  -2   18.30    2.80
  -7  10  -2   23.50    2.30
   7 -10   2   22.70    2.40
  -8  10  -2    0.70    2.40
  -8  10  -2    1.40    1.90
   8 -10   2    6.10    2.20
  -9  10  -2   45.40    3.80
   9 -10   2   51.39    4.70
 -10  10  -2  183.18    8.00
  10 -10   2  185.98    8.00
   9   9  -2  347.27   12.70
  -9  -9   2  331.87   10.10
   8   9  -2    5.50    3.10
   8   9  -2    3.50    2.00
  -8  -9   2    4.80    2.10
   7   9  -2   14.10    2.20
   7   9  -2   10.60    1.60
   7   9  -2   11.90    2.80
  -7  -9   2   11.60    2.20
   6   9  -2   25.70    2.40
   6   9  -2   26.90    2.00
   6   9  -2   18.50    2.90
   6   9  -2   23.40    2.10
  -6  -9   2   25.10    2.40
  -6  -9   2   21.80    2.30
   5   9  -2   11.90    1.90
   5   9  -2   13.70    1.70
   5   9  -2   13.10    2.60
  -5  -9   2   11.60    1.90
  -5  -9   2   11.70    1.70
  -5  -9   2   13.30    1.90
   4   9  -2  185.78    6.00
   4   9  -2  187.58    5.70
  -4  -9   2  199.18    6.20
  -4  -9   2  190.58    5.90
  -4  -9   2  193.48    6.10
   3   9  -2  322.17    8.80
   3   9  -2  326.67    9.00
  -3  -9   2  345.97    9.00
  -3  -9   2  321.57    9.10
  -3  -9   2  331.87    9.10
   2   9  -2  436.66   11.30
   2   9  -2  436.06   11.40
  -2  -9   2  418.46   11.40
  -2  -9   2  452.75   11.60
  -2  -9   2  457.25   11.50
   1   9  -2  149.59    4.90
   1   9  -2  149.49    5.00
  -1  -9   2  152.08    5.00
  -1  -9   2  147.19    5.10
   0   9  -2   70.09    3.30
   0   9  -2   64.99    3.30
   0  -9   2   59.69    3.40
   0  -9   2   68.89    3.30
  -1   9  -2   -0.50    1.30
  -1   9  -2   -0.80    0.60
  -1   9  -2    1.30    1.30
   1  -9   2    1.20    1.30
   1  -9   2    0.60    1.30
  -2   9  -2   45.70    3.00
  -2   9  -2   44.60    3.20
  -2   9  -2   50.19    2.40
   2  -9   2   48.60    3.20
  -3   9  -2  413.86   11.20
  -3   9  -2  427.26   11.30
   3  -9   2  433.66   11.20
   3  -9   2  412.76   11.10
  -4   9  -2  401.26   10.90
   4  -9   2  404.36   10.70
   4  -9   2  395.56   10.80
   4  -9   2  414.66   11.00
  -5   9  -2  315.47    8.70
  -5   9  -2  301.47    8.90
   5  -9   2  295.17    8.70
   5  -9   2  306.87    8.60
  -6   9  -2    4.00    1.50
  -6   9  -2    1.20    2.00
  -6   9  -2    2.30    1.70
   6  -9   2    0.60    1.70
   6  -9   2    3.10    1.50
  -7   9  -2    2.00    1.60
  -7   9  -2   -1.60    2.10
   7  -9   2    2.00    1.90
  -8   9  -2  164.88    6.70
  -8   9  -2  174.78    6.50
   8  -9   2  177.38    6.90
  -9   9  -2  215.48    8.00
   9  -9   2  218.38    8.30
 -10   9  -2   -1.10    2.80
  10  -9   2   -1.00    2.60
  10   8  -2  111.69    8.00
 -10  -8   2   95.39    5.40
   9   8  -2   12.90    3.60
   9   8  -2   11.60    2.30
  -9  -8   2   12.20    2.40
   8   8  -2   21.30    3.50
   8   8  -2   23.70    2.50
   8   8  -2   23.80    2.60
  -8  -8   2   19.20    2.40
   7   8  -2   18.60    3.10
   7   8  -2   24.80    2.40
   7   8  -2   27.70    2.20
  -7  -8   2   22.30    2.30
   6   8  -2    9.30    1.80
   6   8  -2    9.80    1.40
   6   8  -2    5.90    2.40
  -6  -8   2    7.70    1.50
  -6  -8   2    9.50    1.80
  -6  -8   2    8.10    1.70
   5   8  -2  254.37    7.50
   5   8  -2  247.48    8.80
   5   8  -2  260.17    7.20
   5   8  -2  263.87    7.20
   5   8  -2  270.97    7.10
  -5  -8   2  272.47    7.50
  -5  -8   2  267.67    7.40
  -5  -8   2  262.27    7.70
   4   8  -2  180.38    5.80
   4   8  -2  193.88    5.50
  -4  -8   2  193.88    5.90
  -4  -8   2  194.18    5.90
  -4  -8   2  188.08    5.70
   3   8  -2  575.64   14.60
   3   8  -2  585.44   14.40
  -3  -8   2  611.34   14.80
  -3  -8   2  574.54   14.60
  -3  -8   2  605.14   14.70
   2   8  -2   12.60    1.50
   2   8  -2   11.60    1.60
  -2  -8   2   13.40    1.60
  -2  -8   2   11.30    1.40
  -2  -8   2   12.60    1.60
   1   8  -2   16.50    1.70
   1   8  -2   25.70    2.40
  -1  -8   2   19.20    1.70
  -1  -8   2   16.60    1.70
   0   8  -2   51.49    2.80
   0   8  -2   53.69    2.90
   0  -8   2   55.29    2.90
   0  -8   2   55.29    2.90
  -1   8  -2  190.98    5.80
  -1   8  -2  195.38    5.60
  -1   8  -2  181.98    5.70
   1  -8   2  187.38    5.70
   1  -8   2  197.88    5.80
  -2   8  -2 1354.36   32.90
  -2   8  -2 1306.67   31.30
  -2   8  -2 1341.87   31.40
   2  -8   2 1311.37   31.30
  -3   8  -2  112.19    3.90
  -3   8  -2  108.69    4.30
   3  -8   2  107.99    3.80
   3  -8   2  113.29    4.20
   3  -8   2  118.49    4.20
  -4   8  -2  501.55   13.00
  -4   8  -2  537.35   13.10
   4  -8   2  492.45   13.20
   4  -8   2  507.35   13.10
   4  -8   2  493.15   12.80
  -5   8  -2    2.70    1.80
  -5   8  -2    6.20    1.40
  -5   8  -2    4.80    1.60
   5  -8   2    1.80    1.40
   5  -8   2    7.70    1.60
   5  -8   2    8.00    1.50
  -6   8  -2   64.49    3.60
  -6   8  -2   65.99    3.40
  -6   8  -2   57.59    4.00
   6  -8   2   71.49    3.80
   6  -8   2   64.19    3.40
  -7   8  -2  230.28    7.40
  -7   8  -2  220.38    7.40
  -7   8  -2  227.78    7.50
   7  -8   2  226.98    6.90
   7  -8   2  222.98    7.70
  -8   8  -2  353.96   10.30
   8  -8   2  343.47   11.00
  -9   8  -2    3.20    2.40
   9  -8   2    1.40    2.40
 -10   8  -2  178.48    7.20
  10  -8   2  166.18    7.90
 -11   8  -2    8.90    3.10
  11  -8   2    8.20    3.40
  10   7  -2   21.80    4.00
 -10  -7   2   25.40    2.70
   9   7  -2   25.60    3.80
   9   7  -2   26.10    2.70
   9   7  -2   23.40    2.80
  -9  -7   2   23.30    2.50
   8   7  -2    7.40    2.00
   8   7  -2    5.60    1.90
   8   7  -2    1.20    2.70
  -8  -7   2    5.20    1.80
   7   7  -2   14.90    2.00
   7   7  -2   18.30    3.10
   7   7  -2   13.80    2.00
  -7  -7   2   13.20    1.80
  -7  -7   2   13.40    1.60
   6   7  -2  192.38    7.50
   6   7  -2  187.38    6.10
   6   7  -2  190.38    6.10
  -6  -7   2  192.88    5.70
   5   7  -2  168.98    6.60
   5   7  -2  169.38    5.50
   5   7  -2  169.88    5.30
  -5  -7   2  179.28    5.40
  -5  -7   2  181.58    5.60
  -5  -7   2  183.78    5.30
   4   7  -2  456.45   12.20
   4   7  -2  465.55   12.00
   4   7  -2  478.25   11.60
  -4  -7   2  486.05   11.90
  -4  -7   2  483.45   11.90
  -4  -7   2  475.15   12.10
   3   7  -2  141.19    4.60
   3   7  -2  145.79    4.30
  -3  -7   2  146.39    4.70
  -3  -7   2  146.79    4.70
  -3  -7   2  150.38    4.50
   2   7  -2   49.30    2.70
   2   7  -2   47.40    2.40
  -2  -7   2   53.99    2.60
  -2  -7   2   47.00    2.60
   1   7  -2  138.89    4.30
   1   7  -2  135.39    4.40
  -1  -7   2  150.28    4.40
  -1  -7   2  135.69    4.40
   0   7  -2   76.49    3.00
   0   7  -2   80.29    3.10
   0  -7   2   70.89    3.10
  -1   7  -2 1162.48   28.40
  -1   7  -2 1132.29   27.00
  -1   7  -2 1150.68   27.10
   1  -7   2 1144.09   27.10
  -2   7  -2  672.43   16.70
  -2   7  -2  679.03   16.70
  -2   7  -2  710.93   17.40
   2  -7   2  706.03   16.70
   2  -7   2  697.43   16.70
   2  -7   2  653.03   17.20
  -3   7  -2 2354.66   59.49
  -3   7  -2 2390.76   56.19
  -3   7  -2 2491.15   56.19
   3  -7   2 2463.65   56.09
   3  -7   2 2480.05   56.19
   3  -7   2 2389.86   59.29
  -4   7  -2   80.49    3.70
  -4   7  -2   82.49    3.50
   4  -7   2   86.89    3.50
   4  -7   2   78.99    3.50
   4  -7   2   82.49    3.40
  -5   7  -2  550.24   13.90
  -5   7  -2  571.74   14.70
  -5   7  -2  548.85   14.10
   5  -7   2  549.25   14.10
   5  -7   2  549.05   14.80
   5  -7   2  551.84   13.80
  -6   7  -2  564.64   14.60
  -6   7  -2  582.14   14.50
  -6   7  -2  579.74   15.40
   6  -7   2  548.55   15.60
   6  -7   2  581.14   14.20
   6  -7   2  590.44   14.80
  -7   7  -2  369.66   10.10
  -7   7  -2  364.06   10.20
  -7   7  -2  378.26   10.80
   7  -7   2  384.06    9.60
   7  -7   2  337.37   11.10
  -8   7  -2   12.40    2.30
   8  -7   2   12.20    2.60
  -9   7  -2  334.27    9.90
   9  -7   2  321.67   11.20
 -10   7  -2   -0.30    2.50
  10  -7   2    2.10    2.90
 -11   7  -2   19.40    3.20
  11  -7   2   24.90    4.10
  10   6  -2    0.70    3.00
  10   6  -2    3.20    2.40
 -10  -6   2   -1.80    1.80
   9   6  -2    8.20    3.00
   9   6  -2   10.40    2.40
   9   6  -2   10.40    2.20
  -9  -6   2   10.10    2.00
   8   6  -2    1.00    1.70
   8   6  -2   -0.10    1.80
   8   6  -2    1.00    2.60
  -8  -6   2    1.60    1.60
  -8  -6   2    2.20    1.30
   7   6  -2   12.10    1.90
   7   6  -2    7.10    2.60
  -7  -6   2   14.10    1.50
  -7  -6   2   13.40    1.70
   6   6  -2    7.10    2.20
   6   6  -2   13.70    1.80
  -6  -6   2   11.10    1.30
   5   6  -2  654.03   17.70
   5   6  -2  651.03   16.00
  -5  -6   2  635.64   15.70
  -5  -6   2  643.74   15.70
  -5  -6   2  666.53   16.20
   4   6  -2  313.67    8.40
   4   6  -2  324.77    8.00
   4   6  -2  309.87    8.60
  -4  -6   2  322.97    8.50
  -4  -6   2  319.17    8.30
  -4  -6   2  326.17    8.20
   3   6  -2  334.37    8.20
   3   6  -2  320.27    8.50
   3   6  -2  320.37    8.50
  -3  -6   2  331.97    8.50
  -3  -6   2  343.37    8.40
   2   6  -2   -0.30    0.80
   2   6  -2    1.00    0.90
  -2  -6   2   -0.30    0.80
  -2  -6   2    0.20    0.90
  -2  -6   2   -0.20    0.80
   1   6  -2  605.34   14.90
   1   6  -2  621.74   14.90
  -1  -6   2  652.53   15.00
  -1  -6   2  616.64   14.90
  -1  -6   2  597.74   14.90
   0   6  -2  894.31   21.70
   0   6  -2  921.11   21.70
   0  -6   2  957.60   21.70
   0  -6   2  900.81   21.70
  -1   6  -2   30.00    2.20
  -1   6  -2   29.40    1.70
  -1   6  -2   27.90    2.00
   1  -6   2   29.30    2.20
  -2   6  -2 1278.97   29.30
  -2   6  -2 1231.68   29.20
  -2   6  -2 1236.28   29.20
  -2   6  -2 1285.97   30.80
   2  -6   2 1202.68   30.70
   2  -6   2 1245.28   29.20
   2  -6   2 1252.37   29.20
  -3   6  -2  629.94   15.20
  -3   6  -2  596.54   16.00
  -3   6  -2  626.44   15.20
   3  -6   2  641.94   15.30
   3  -6   2  617.94   15.10
   3  -6   2  621.94   15.90
  -4   6  -2  389.26    9.90
  -4   6  -2  380.26    9.90
   4  -6   2  382.06   10.50
   4  -6   2  380.66    9.80
   4  -6   2  380.46    9.90
  -5   6  -2  265.47    7.40
  -5   6  -2  283.97    7.90
  -5   6  -2  264.27    7.50
   5  -6   2  249.38    8.00
   5  -6   2  266.37    7.20
   5  -6   2  266.97    7.50
  -6   6  -2  218.08    6.60
  -6   6  -2  222.58    6.50
  -6   6  -2  228.78    7.00
   6  -6   2  216.98    6.60
   6  -6   2  222.68    6.20
   6  -6   2  205.48    7.30
  -7   6  -2    7.50    1.90
  -7   6  -2    7.90    1.70
  -7   6  -2   10.90    2.00
   7  -6   2   14.70    2.50
   7  -6   2   13.60    1.90
  -8   6  -2  596.74   15.30
   8  -6   2  587.54   17.10
  -9   6  -2    4.80    2.30
   9  -6   2    5.80    2.70
 -10   6  -2   80.69    5.20
  10  -6   2   73.09    6.20
 -11   6  -2   19.40    3.10
  11  -6   2   20.40    4.00
  10   5  -2   29.20    2.90
  10   5  -2   27.90    4.10
  10   5  -2   29.90    3.60
   9   5  -2   24.00    2.60
   9   5  -2   31.60    4.00
  -9  -5   2   28.30    2.20
   8   5  -2    4.00    2.50
   8   5  -2    3.40    1.80
  -8  -5   2    5.20    1.60
  -8  -5   2    6.80    1.30
   7   5  -2  152.08    6.70
   7   5  -2  148.39    5.30
  -7  -5   2  153.48    4.60
  -7  -5   2  163.08    4.80
   6   5  -2  122.69    5.50
   6   5  -2  120.29    4.40
  -6  -5   2  118.99    3.70
  -6  -5   2  120.49    3.80
   5   5  -2  175.48    6.50
   5   5  -2  181.78    5.50
  -5  -5   2  189.48    5.10
  -5  -5   2  184.88    5.00
   4   5  -2  177.98    4.50
   4   5  -2  169.18    5.10
  -4  -5   2  174.78    4.80
  -4  -5   2  165.18    4.70
   3   5  -2   36.30    2.10
   3   5  -2   36.10    1.70
   3   5  -2   35.70    1.60
  -3  -5   2   34.20    2.00
  -3  -5   2   39.30    1.80
  -3  -5   2   33.20    1.90
   2   5  -2 2231.68   52.89
   2   5  -2 2330.47   52.79
  -2  -5   2 2402.66   52.89
  -2  -5   2 2241.78   52.89
  -2  -5   2 2320.57   52.99
   1   5  -2 1177.08   27.00
   1   5  -2 1119.99   27.10
  -1  -5   2 1124.79   27.00
  -1  -5   2 1219.58   27.10
  -1  -5   2 1177.78   27.10
   0   5  -2 1719.63   40.80
   0   5  -2 1776.52   40.90
   0  -5   2 1758.42   40.90
   0  -5   2 1821.62   40.90
   0  -5   2 1782.32   40.90
  -1   5  -2 1517.05   34.00
  -1   5  -2 1564.34   35.90
   1  -5   2 1458.65   35.90
   1  -5   2 1266.27   33.90
   1  -5   2 1517.25   34.00
  -2   5  -2   46.80    2.20
  -2   5  -2   49.30    2.30
  -2   5  -2   43.90    2.30
  -2   5  -2   45.50    2.20
   2  -5   2   44.90    2.20
   2  -5   2   45.50    2.10
   2  -5   2   44.90    2.30
  -3   5  -2  240.58    6.90
  -3   5  -2  233.48    6.50
  -3   5  -2  244.38    6.50
   3  -5   2  241.38    6.50
   3  -5   2  241.78    6.40
   3  -5   2  245.58    6.80
  -4   5  -2 2374.86   54.89
  -4   5  -2 2439.86   54.89
   4  -5   2 2412.16   54.89
   4  -5   2 2239.78   58.49
   4  -5   2 2426.46   54.79
  -5   5  -2  191.48    5.90
  -5   5  -2  200.88    5.90
  -5   5  -2  224.08    6.40
   5  -5   2  196.48    5.70
   5  -5   2  204.68    5.90
   5  -5   2  194.38    6.60
  -6   5  -2   25.00    1.90
  -6   5  -2   28.30    2.80
  -6   5  -2   24.00    2.00
   6  -5   2   25.20    2.20
   6  -5   2   28.70    2.60
   6  -5   2   31.20    2.50
  -7   5  -2  226.38    7.00
  -7   5  -2  238.98    6.80
  -7   5  -2  231.58    7.80
   7  -5   2  230.48    7.00
   7  -5   2  239.68    8.20
  -8   5  -2    0.50    1.90
  -8   5  -2    1.40    1.60
   8  -5   2    1.20    2.30
  -9   5  -2   14.80    2.30
   9  -5   2   13.50    2.90
 -10   5  -2   -2.90    2.30
  10  -5   2   -0.40    2.70
 -11   5  -2    0.40    2.60
  11  -5   2    5.90    3.40
  11   4  -2   21.90    4.00
  11   4  -2   15.20    3.40
  10   4  -2    0.10    2.90
  10   4  -2    2.00    2.00
  10   4  -2   -0.30    2.40
   9   4  -2    0.70    2.70
   9   4  -2    7.40    2.10
  -9  -4   2    7.20    1.30
   8   4  -2   78.39    4.10
   8   4  -2   83.79    5.60
  -8  -4   2   80.49    3.00
  -8  -4   2   84.39    3.60
   7   4  -2   67.69    4.90
   7   4  -2   76.49    3.80
  -7  -4   2   78.49    2.80
  -7  -4   2   82.19    3.20
   6   4  -2  535.85   13.60
   6   4  -2  537.05   15.10
  -6  -4   2  540.15   12.90
  -6  -4   2  542.85   12.90
   5   4  -2   66.69    3.90
   5   4  -2   67.69    3.10
  -5  -4   2   72.69    2.50
  -5  -4   2   74.19    2.40
   4   4  -2  112.09    3.90
  -4  -4   2  114.89    3.30
  -4  -4   2  124.79    3.40
   3   4  -2 2541.15   62.09
   3   4  -2 2408.06   57.09
   3   4  -2 2552.84   57.09
  -3  -4   2 2486.35   57.19
  -3  -4   2 2506.15   57.09
  -3  -4   2 2428.76   56.89
   2   4  -2  115.39    3.40
   2   4  -2  120.99    3.60
   2   4  -2  124.69    3.30
  -2  -4   2  119.09    3.60
  -2  -4   2  114.29    3.40
  -2  -4   2  129.69    3.40
   1   4  -2 1152.68   28.60
   1   4  -2 1106.29   26.40
   1   4  -2 1129.39   26.30
  -1  -4   2 1179.38   26.40
  -1  -4   2 1130.59   26.40
  -1  -4   2 1161.08   28.50
  -1  -4   2 1113.49   26.30
   0   4  -2 9008.10  201.08
   0   4  -2 8514.95  201.58
   0   4  -2 8717.63  201.38
   0  -4   2 8848.91  219.08
   0  -4   2 8704.63  201.28
   0  -4   2 8530.25  201.48
   0  -4   2 9073.29  201.18
  -1   4  -2  374.46    9.20
  -1   4  -2  379.96    9.60
  -1   4  -2  381.76    9.20
   1  -4   2  364.76    9.20
   1  -4   2  366.66    9.20
   1  -4   2  391.46    9.20
   1  -4   2  364.96    9.60
  -2   4  -2  149.69    4.10
  -2   4  -2  143.69    4.10
  -2   4  -2  139.89    4.40
  -2   4  -2  138.09    4.10
   2  -4   2  143.49    4.10
   2  -4   2  146.39    4.30
   2  -4   2  139.49    4.10
  -3   4  -2 1411.56   32.40
  -3   4  -2 1393.66   32.40
  -3   4  -2 1454.95   34.60
   3  -4   2 1308.17   34.60
   3  -4   2 1422.26   32.40
   3  -4   2 1387.56   32.30
  -4   4  -2  604.44   14.20
  -4   4  -2  571.94   14.10
   4  -4   2  579.34   15.50
   4  -4   2  576.74   14.20
   4  -4   2  589.74   14.00
  -5   4  -2   84.69    3.50
  -5   4  -2   63.29    3.10
  -5   4  -2   67.29    3.00
   5  -4   2   80.69    3.00
   5  -4   2   83.79    3.70
   5  -4   2   60.79    2.80
  -6   4  -2   59.09    3.10
  -6   4  -2   65.59    3.00
  -6   4  -2   63.99    3.60
   6  -4   2   62.59    2.60
   6  -4   2   62.39    3.80
  -7   4  -2  509.15   12.70
  -7   4  -2  489.35   12.80
   7  -4   2  520.85   14.60
  -8   4  -2   52.79    3.70
  -8   4  -2   58.79    3.20
   8  -4   2   65.49    3.50
   8  -4   2   64.99    4.80
  -9   4  -2   12.40    2.20
   9  -4   2    9.40    2.60
 -10   4  -2    1.70    2.30
  10  -4   2    5.50    2.90
 -11   4  -2   -0.80    2.40
  11  -4   2   -1.30    2.90
  11   3  -2    0.00    3.10
  11   3  -2    1.20    2.90
  10   3  -2    3.20    2.10
  10   3  -2    2.20    2.80
   9   3  -2   52.29    4.00
   9   3  -2   57.39    5.30
   8   3  -2   12.00    2.70
   8   3  -2   10.70    2.10
   7   3  -2  811.02   21.70
   7   3  -2  805.82   19.90
   6   3  -2   17.90    1.80
   6   3  -2   17.80    2.40
  -6  -3   2   23.10    1.70
   5   3  -2  965.50   22.80
   5   3  -2  937.11   24.50
  -5  -3   2  961.30   22.10
   4   3  -2    4.30    1.10
  -4  -3   2    5.00    0.70
  -4  -3   2    4.20    0.60
   3   3  -2   14.90    1.30
  -3  -3   2   14.20    1.30
  -3  -3   2   12.50    1.00
  -3  -3   2   13.10    0.90
   2   3  -2 2356.26   60.19
   2   3  -2 2385.06   55.99
   2   3  -2 2367.36   54.89
  -2  -3   2 2434.26   54.99
  -2  -3   2 2418.16   55.79
  -2  -3   2 2354.76   54.49
   1   3  -2   86.29    2.60
   1   3  -2   91.99    2.60
  -1  -3   2   95.49    2.60
  -1  -3   2   84.49    2.60
  -1  -3   2   97.09    2.80
  -1  -3   2   85.89    2.60
   0   3  -2  167.78    4.70
   0   3  -2  173.88    4.80
   0   3  -2  185.88    4.50
   0   3  -2  182.28    4.50
   0   3  -2  173.08    4.50
   0  -3   2  178.88    4.80
   0  -3   2  179.08    4.50
  -1   3  -2    6.40    0.80
  -1   3  -2    7.20    0.80
   1  -3   2    6.30    0.80
   1  -3   2    6.00    0.90
   1  -3   2    4.80    0.80
  -2   3  -2 2374.06   54.69
  -2   3  -2 2502.05   54.79
  -2   3  -2 2355.76   59.69
   2  -3   2 2278.17   59.49
   2  -3   2 2445.66   54.69
   2  -3   2 2386.96   55.19
  -3   3  -2   11.20    1.00
  -3   3  -2   13.10    1.30
  -3   3  -2   10.50    1.10
   3  -3   2   11.60    1.00
   3  -3   2    9.20    1.00
   3  -3   2   13.10    1.40
  -4   3  -2   92.59    3.20
  -4   3  -2  100.99    3.20
   4  -3   2   96.19    3.10
   4  -3   2   96.39    3.80
  -5   3  -2  435.46   11.80
  -5   3  -2  434.46   10.60
  -5   3  -2  416.96   10.60
   5  -3   2  415.96   11.90
   5  -3   2  434.16   10.40
  -6   3  -2  650.83   16.10
  -6   3  -2  709.13   17.90
  -6   3  -2  669.63   16.10
   6  -3   2  632.64   17.80
  -7   3  -2  133.29    4.70
  -7   3  -2  140.39    4.50
   7  -3   2  146.39    6.00
  -8   3  -2   -0.80    1.30
  -8   3  -2   -1.80    1.60
   8  -3   2    1.20    2.10
  -9   3  -2   24.20    2.40
   9  -3   2   24.30    3.30
 -10   3  -2   -1.40    2.00
  10  -3   2   -0.20    2.60
 -11   3  -2   -0.90    2.30
  11  -3   2    2.00    3.00
  11   2  -2    2.30    2.30
  11   2  -2   -1.40    2.90
  11   2  -2    0.30    2.80
  10   2  -2   37.60    3.20
  10   2  -2   39.10    4.00
   9   2  -2   -1.70    1.90
   9   2  -2   -4.40    2.20
   8   2  -2  777.12   19.50
   8   2  -2  769.72   21.10
   7   2  -2   -1.20    1.80
   7   2  -2   -0.40    1.60
   6   2  -2 1027.20   27.30
   6   2  -2 1100.99   25.60
   5   2  -2  332.67    9.70
   5   2  -2  347.07    9.10
   4   2  -2  151.48    4.60
   3   2  -2 1136.29   26.50
   2   2  -2 6004.20  155.48
   2   2  -2 6372.36  143.39
  -2  -2   2 6327.17  141.39
  -2  -2   2 6178.78  142.99
  -2  -2   2 6122.29  141.29
   1   2  -2  369.36    8.90
   1   2  -2  374.06    8.70
   1   2  -2  387.36    8.70
   1   2  -2  372.16    9.60
  -1  -2   2  381.46    8.80
  -1  -2   2  378.26    8.80
  -1  -2   2  365.06    8.90
  -1  -2   2  372.26    9.60
   0   2  -2 2464.35   55.09
   0   2  -2 2360.66   55.09
   0   2  -2 2399.76   60.19
   0  -2   2 2467.25   55.19
   0  -2   2 2393.16   60.29
   0  -2   2 2332.87   58.89
   0  -2   2 2251.37   54.99
  -1   2  -2  180.18    4.50
  -1   2  -2  173.48    4.90
  -1   2  -2  172.18    4.30
  -1   2  -2  175.68    4.40
   1  -2   2  169.58    4.40
   1  -2   2  187.88    4.40
   1  -2   2  170.58    4.80
   1  -2   2  179.88    4.50
  -2   2  -2  262.47    7.10
  -2   2  -2  256.57    6.40
  -2   2  -2  266.57    6.50
   2  -2   2  259.87    6.40
   2  -2   2  253.57    6.30
   2  -2   2  258.07    7.20
  -3   2  -2   56.09    2.10
  -3   2  -2   57.49    2.20
  -3   2  -2   59.49    2.60
   3  -2   2   57.59    2.10
   3  -2   2   59.49    2.70
  -4   2  -2   86.29    2.80
  -4   2  -2   89.89    3.60
  -4   2  -2   79.79    2.80
   4  -2   2   85.69    2.80
   4  -2   2   86.89    3.60
  -5   2  -2  652.63   15.80
  -5   2  -2  680.63   17.50
  -5   2  -2  639.84   15.80
   5  -2   2  647.34   17.50
   5  -2   2  677.03   15.60
  -6   2  -2   79.39    3.30
  -6   2  -2   82.29    3.10
  -6   2  -2   92.79    4.30
   6  -2   2   86.69    4.30
  -7   2  -2   42.30    2.80
  -7   2  -2   43.20    2.50
   7  -2   2   47.60    4.10
  -8   2  -2  107.99    4.30
  -8   2  -2  101.79    3.90
   8  -2   2  101.59    5.70
  -9   2  -2   11.40    2.00
   9  -2   2   15.60    3.10
 -10   2  -2   12.80    2.30
  10  -2   2    8.80    2.20
  10  -2   2    7.60    3.00
 -11   2  -2    1.80    2.30
  11  -2   2    4.00    3.10
  11   1  -2    3.90    2.90
  11   1  -2    4.30    2.40
  10   1  -2    8.20    2.90
  10   1  -2    2.90    2.40
   9   1  -2  508.15   15.30
   9   1  -2  525.75   14.10
   8   1  -2   17.80    2.70
   8   1  -2   21.20    2.80
   7   1  -2  773.52   21.00
   7   1  -2  809.32   19.80
   6   1  -2  100.19    4.40
   5   1  -2   42.30    2.90
   4   1  -2   55.79    2.70
   2   1  -2 1062.59   26.80
   1   1  -2 2393.16   54.59
   1   1  -2 2455.25   54.79
   1   1  -2 2309.57   60.09
  -1  -1   2 2312.87   60.39
  -1  -1   2 2394.06   54.59
  -1  -1   2 2431.96   54.79
   0   1  -2   25.80    1.30
   0   1  -2   28.60    1.00
   0   1  -2   27.60    1.10
   0   1  -2   28.40    1.00
   0  -1   2   25.60    1.00
  -1   1  -2   49.00    1.70
  -1   1  -2   44.20    1.90
  -1   1  -2   44.70    1.70
  -1   1  -2   46.40    1.40
   1  -1   2   44.00    2.00
   1  -1   2   51.89    1.70
   1  -1   2   45.90    1.40
   1  -1   2   46.20    1.60
  -2   1  -2 2291.17   53.29
  -2   1  -2 2348.17   54.29
  -2   1  -2 2347.47   58.09
   2  -1   2 2233.88   58.19
   2  -1   2 2279.37   53.39
   2  -1   2 2444.86   53.39
  -3   1  -2   21.40    1.80
  -3   1  -2   29.10    1.60
  -3   1  -2   30.10    1.50
   3  -1   2   28.10    1.50
   3  -1   2   27.10    2.00
  -4   1  -2 1394.66   34.50
  -4   1  -2 1377.16   31.90
  -4   1  -2 1353.46   31.90
   4  -1   2 1371.36   34.40
   4  -1   2 1390.46   31.70
  -5   1  -2  590.94   14.40
  -5   1  -2  588.14   14.30
  -5   1  -2  620.14   16.10
   5  -1   2  601.54   14.10
   5  -1   2  585.94   16.00
  -6   1  -2    5.20    1.00
  -6   1  -2    3.90    1.20
  -6   1  -2    5.50    1.70
   6  -1   2    4.20    1.70
  -7   1  -2  183.38    5.50
  -7   1  -2  176.78    5.30
   7  -1   2  180.98    7.00
  -8   1  -2   -1.10    1.20
  -8   1  -2   -1.30    1.50
   8  -1   2   -3.40    2.10
   8  -1   2    0.80    1.50
  -9   1  -2    0.60    1.70
   9  -1   2    0.20    2.50
   9  -1   2    1.00    1.70
 -10   1  -2   15.50    2.30
  10  -1   2   12.80    3.40
 -11   1  -2  190.38    6.80
  11  -1   2  176.88    9.10
  11   0  -2   15.60    3.00
  11   0  -2   19.50    3.40
  10   0  -2  303.37    9.80
  10   0  -2  310.17   10.70
   9   0  -2   25.90    3.10
   9   0  -2   24.90    3.10
   8   0  -2  827.72   22.20
   7   0  -2  126.19    5.20
   6   0  -2    4.20    1.50
   5   0  -2   43.10    2.70
   4   0  -2  269.87    7.50
   2   0  -2  745.53   19.00
  -2   0   2  726.83   17.10
  -2   0   2  758.52   17.00
   1   0  -2   34.60    1.40
   1   0  -2   35.10    1.20
  -1   0   2   36.80    1.30
  -1   0   2   35.80    1.10
   0   0  -2   71.89    2.00
   0   0  -2   66.89    2.30
   0   0  -2   66.59    2.10
   0   0  -2   71.39    2.00
   0   0   2   65.69    2.10
   0   0   2   72.69    2.00
  -1   0  -2  786.92   18.80
  -1   0  -2  803.12   20.50
  -1   0  -2  833.82   18.80
   1   0   2  814.32   18.80
   1   0   2  788.42   18.80
   1   0   2  806.82   20.50
   1   0   2  808.72   20.00
  -2   0  -2  197.48    5.40
  -2   0  -2  208.88    5.20
  -2   0  -2  202.38    5.80
   2   0   2  203.38    5.80
   2   0   2  206.38    5.80
   2   0   2  206.38    5.20
  -3   0  -2  729.93   17.80
  -3   0  -2  782.42   17.70
   3   0   2  761.22   17.60
   3   0   2  742.03   19.20
  -4   0  -2  339.57    8.40
  -4   0  -2  330.17    8.50
  -4   0  -2  354.46    9.60
   4   0   2  325.77    9.50
   4   0   2  323.97    8.20
  -5   0  -2  262.37    7.80
  -5   0  -2  237.88    6.60
  -5   0  -2  244.58    6.50
   5   0   2  236.78    7.60
   5   0   2  241.08    6.10
  -6   0  -2   85.79    3.20
  -6   0  -2   84.49    3.30
   6   0   2   83.89    3.30
   6   0   2   80.49    4.40
  -7   0  -2   56.09    2.80
  -7   0  -2   60.39    3.20
   7   0   2   60.79    3.10
   7   0   2   59.79    4.40
  -8   0  -2   -0.10    1.50
  -8   0  -2    0.90    1.30
   8   0   2    1.20    2.20
   8   0   2    1.20    1.50
  -9   0  -2   -1.50    1.70
   9   0   2    1.60    1.60
   9   0   2   -0.30    2.50
 -10   0  -2  257.37    7.80
  10   0   2  250.07   10.30
 -11   0  -2   17.40    2.60
  11   0   2   15.10    3.90
  11  -1  -2  137.39    6.70
  11  -1  -2  143.29    7.30
  10  -1  -2    1.00    2.60
  10  -1  -2    6.40    2.50
   9  -1  -2  101.69    5.50
   8  -1  -2  146.99    6.00
   7  -1  -2    5.20    1.70
  -7   1   2    5.90    1.00
   6  -1  -2   59.89    3.30
  -6   1   2   60.39    2.20
   5  -1  -2    7.00    1.30
  -5   1   2    6.80    0.80
  -5   1   2    6.20    0.80
   4  -1  -2  277.17    7.50
  -4   1   2  276.77    6.60
  -4   1   2  266.97    6.60
   3  -1  -2  182.78    5.10
  -3   1   2  183.78    4.50
  -3   1   2  183.48    4.60
   2  -1  -2 3221.88   70.59
   2  -1  -2 3121.29   71.09
   2  -1  -2 3034.10   77.69
  -2   1   2 2977.00   73.19
   1  -1  -2  892.61   22.90
   1  -1  -2  923.21   21.00
   1  -1  -2  926.81   22.10
  -1   1   2  901.01   22.10
  -1   1   2  861.41   22.90
  -1   1   2  890.31   20.90
  -1   1   2  946.31   21.00
   0  -1  -2   37.10    1.70
   0  -1  -2   41.00    1.60
   0  -1  -2   40.30    1.50
   0   1   2   42.30    1.50
   0   1   2   40.50    1.70
   0   1   2   41.70    1.60
  -1  -1  -2 1705.63   42.00
  -1  -1  -2 1721.93   39.50
  -1  -1  -2 1724.93   42.90
  -1  -1  -2 1686.33   39.20
   1   1   2 1743.53   39.10
   1   1   2 1683.93   39.20
   1   1   2 1648.24   42.60
   1   1   2 1718.43   42.90
  -2  -1  -2  128.89    3.70
  -2  -1  -2  129.49    3.70
   2   1   2  124.69    3.90
   2   1   2  121.89    4.10
   2   1   2  123.39    3.50
  -3  -1  -2 1478.05   33.30
  -3  -1  -2 1432.46   33.30
   3   1   2 1388.36   32.70
   3   1   2 1462.05   33.10
   3   1   2 1403.56   35.60
  -4  -1  -2  334.37    9.50
  -4  -1  -2  337.47    8.40
  -4  -1  -2  328.77    8.50
   4   1   2  326.67    8.00
   4   1   2  316.77    9.40
   4   1   2  330.77    8.10
  -5  -1  -2   74.69    3.90
  -5  -1  -2   69.69    3.10
  -5  -1  -2   72.89    2.90
   5   1   2   67.09    2.60
   5   1   2   67.79    3.80
   5   1   2   69.19    2.40
  -6  -1  -2  190.98    5.80
  -6  -1  -2  201.68    5.80
   6   1   2  194.38    5.40
   6   1   2  194.58    7.00
  -7  -1  -2   13.10    1.70
  -7  -1  -2   10.60    1.70
   7   1   2   11.70    1.50
   7   1   2   11.80    2.40
  -8  -1  -2    3.20    1.50
  -8  -1  -2    2.60    1.60
   8   1   2    1.40    1.50
   8   1   2    4.70    2.40
  -9  -1  -2  379.36   10.40
   9   1   2  377.56   10.20
   9   1   2  393.46   12.90
 -10  -1  -2    6.70    2.20
  10   1   2    6.60    3.30
  11  -2  -2    1.00    2.70
  11  -2  -2   -1.70    2.70
  10  -2  -2  291.97   10.20
 -10   2   2  296.37    7.90
   9  -2  -2   -0.80    1.90
  -9   2   2    0.40    1.10
  -9   2   2   -2.00    1.40
   8  -2  -2  128.59    5.60
  -8   2   2  133.69    4.10
  -8   2   2  127.99    4.20
   7  -2  -2  146.99    5.50
  -7   2   2  150.88    4.30
  -7   2   2  152.48    4.40
   6  -2  -2   -0.40    1.20
  -6   2   2   -1.60    0.90
  -6   2   2   -1.10    0.90
   5  -2  -2  403.76   10.40
  -5   2   2  371.16    9.30
  -5   2   2  382.86    9.30
   4  -2  -2   16.40    1.60
   4  -2  -2   18.70    1.00
  -4   2   2   23.60    1.50
  -4   2   2   19.00    1.40
   3  -2  -2  401.96    9.60
   3  -2  -2  401.56   10.20
  -3   2   2  406.36    9.70
  -3   2   2  406.36    9.70
   2  -2  -2  440.26   11.70
   2  -2  -2  441.96   10.40
  -2   2   2  435.66   10.40
  -2   2   2  433.36   10.50
   1  -2  -2 1878.01   41.90
   1  -2  -2 1833.62   45.70
   1  -2  -2 1775.42   41.80
  -1   2   2 1858.61   41.90
  -1   2   2 1773.22   41.80
  -1   2   2 1831.32   45.70
   0  -2  -2  101.39    3.00
   0  -2  -2  100.19    3.00
   0  -2  -2  101.89    3.20
   0  -2  -2  103.49    3.00
   0   2   2   97.39    3.10
   0   2   2  102.79    3.00
   0   2   2   98.89    2.90
  -1  -2  -2    3.80    0.80
  -1  -2  -2    3.10    0.90
  -1  -2  -2    1.20    0.60
  -1  -2  -2    4.60    0.90
   1   2   2    2.40    0.90
   1   2   2    2.60    0.50
   1   2   2    2.30    0.90
   1   2   2    2.60    0.90
  -2  -2  -2 1686.33   40.70
  -2  -2  -2 1645.84   38.10
  -2  -2  -2 1693.13   38.20
  -2  -2  -2 1658.03   37.70
   2   2   2 1611.54   38.10
   2   2   2 1607.54   40.60
   2   2   2 1662.33   37.60
   2   2   2 1633.44   41.40
  -3  -2  -2    4.50    1.00
  -3  -2  -2    7.20    1.10
   3   2   2    6.90    1.00
   3   2   2    5.10    0.70
   3   2   2    4.70    0.90
   3   2   2    3.80    1.20
  -4  -2  -2  592.24   14.10
  -4  -2  -2  575.44   14.00
   4   2   2  574.74   15.30
   4   2   2  557.84   15.30
   4   2   2  577.64   13.70
   4   2   2  560.54   13.50
  -5  -2  -2  255.37    7.20
  -5  -2  -2  266.57    7.20
   5   2   2  258.37    6.60
   5   2   2  254.17    8.20
   5   2   2  255.97    6.60
  -6  -2  -2    8.40    1.40
  -6  -2  -2    7.50    1.50
   6   2   2    7.10    1.20
   6   2   2    5.10    1.90
  -7  -2  -2   43.30    3.00
  -7  -2  -2   41.80    3.30
   7   2   2   47.10    3.80
   7   2   2   44.40    2.60
  -8  -2  -2  438.96   12.00
   8   2   2  454.95   11.50
   8   2   2  468.25   14.20
  -9  -2  -2   -1.70    1.90
   9   2   2   -5.30    1.60
   9   2   2   -0.20    2.70
 -10  -2  -2  207.28    7.30
  10   2   2  225.48    9.70
  11  -3  -2  165.58    7.70
  10  -3  -2   46.20    4.00
 -10   3   2   44.80    3.30
   9  -3  -2   98.39    5.30
  -9   3   2   95.99    4.00
  -9   3   2   94.69    3.70
   8  -3  -2   -1.00    1.80
  -8   3   2   -5.10    1.40
  -8   3   2   -1.20    1.20
   7  -3  -2   42.00    3.10
  -7   3   2   40.20    2.40
  -7   3   2   33.80    2.50
   6  -3  -2   14.70    1.70
  -6   3   2    9.00    1.40
  -6   3   2   11.40    1.30
   5  -3  -2  591.74   13.60
   5  -3  -2  592.14   15.00
  -5   3   2  589.24   14.00
  -5   3   2  558.54   14.00
   4  -3  -2   28.40    1.70
  -4   3   2   27.90    1.90
  -4   3   2   29.90    1.80
   3  -3  -2 1169.08   28.80
  -3   3   2 1206.08   27.40
  -3   3   2 1164.78   27.40
   2  -3  -2   31.40    1.70
   2  -3  -2   30.60    2.20
  -2   3   2   33.70    1.80
  -2   3   2   30.10    1.90
   1  -3  -2    1.30    0.80
   1  -3  -2    1.10    0.90
  -1   3   2    0.90    0.50
  -1   3   2    0.30    0.80
  -1   3   2    1.10    0.80
  -1   3   2    2.30    0.90
   0  -3  -2   13.70    1.00
   0  -3  -2   13.50    1.10
   0  -3  -2   12.50    1.10
   0   3   2   12.30    1.10
   0   3   2   12.50    1.00
   0   3   2   12.50    1.00
   0   3   2   11.20    1.10
  -1  -3  -2 1383.36   32.80
  -1  -3  -2 1438.66   32.50
  -1  -3  -2 1426.46   35.60
   1   3   2 1417.76   32.40
   1   3   2 1420.06   32.80
   1   3   2 1420.26   35.60
   1   3   2 1406.16   34.80
  -2  -3  -2  128.69    3.80
  -2  -3  -2  120.99    3.70
  -2  -3  -2  123.69    3.30
   2   3   2  121.59    3.80
   2   3   2  122.39    4.20
   2   3   2  124.79    3.80
   2   3   2  124.89    3.30
  -3  -3  -2  798.92   18.80
  -3  -3  -2  805.42   19.30
  -3  -3  -2  828.92   19.40
   3   3   2  783.42   20.80
   3   3   2  819.82   18.70
   3   3   2  821.92   20.80
   3   3   2  802.82   19.20
  -4  -3  -2  747.73   18.20
  -4  -3  -2  748.93   18.10
   4   3   2  753.12   17.90
   4   3   2  739.43   19.70
   4   3   2  776.02   19.60
   4   3   2  742.33   17.50
  -5  -3  -2  196.88    5.80
  -5  -3  -2  179.88    5.60
   5   3   2  188.28    5.20
   5   3   2  178.58    5.00
   5   3   2  192.18    6.10
   5   3   2  179.98    6.60
  -6  -3  -2  481.45   12.40
  -6  -3  -2  453.25   12.20
   6   3   2  478.15   11.60
   6   3   2  460.35   13.80
   6   3   2  495.95   13.40
  -7  -3  -2  366.76   10.30
  -7  -3  -2  375.26   10.40
   7   3   2  390.26   11.50
   7   3   2  389.26    9.70
   7   3   2  382.86   12.10
  -8  -3  -2   -0.90    1.80
   8   3   2   -0.80    2.50
   8   3   2   -2.50    1.30
  -9  -3  -2  375.36   10.80
   9   3   2  398.86   13.20
 -10  -3  -2   18.70    2.80
  10   3   2   19.70    3.80
  11  -4  -2   64.59    5.50
 -11   4   2   60.49    4.00
  10  -4  -2    0.90    2.30
 -10   4   2    0.50    1.80
   9  -4  -2    3.90    2.10
  -9   4   2    3.00    1.70
  -9   4   2    5.80    1.50
   8  -4  -2    6.40    2.10
  -8   4   2    8.90    1.80
  -8   4   2   11.10    1.70
   7  -4  -2   32.70    3.00
  -7   4   2   30.50    2.60
  -7   4   2   27.90    2.10
   6  -4  -2 1055.09   26.60
  -6   4   2 1081.59   24.80
  -6   4   2 1018.20   24.80
   5  -4  -2  352.16    9.60
  -5   4   2  346.87    9.10
  -5   4   2  379.96    9.20
   4  -4  -2 1336.07   33.80
   4  -4  -2 1402.96   31.90
  -4   4   2 1426.86   32.10
  -4   4   2 1349.66   32.10
   3  -4  -2    5.80    0.90
  -3   4   2    6.00    1.00
  -3   4   2    7.00    1.10
   2  -4  -2    3.60    1.20
   2  -4  -2    2.20    0.90
  -2   4   2    1.60    0.90
  -2   4   2    2.40    0.90
   1  -4  -2    3.50    0.90
   1  -4  -2    5.50    1.10
   1  -4  -2    5.10    0.90
  -1   4   2    5.00    0.60
  -1   4   2    2.50    0.90
  -1   4   2    3.00    1.00
   0  -4  -2 1713.33   38.50
   0  -4  -2 1655.63   38.70
   0  -4  -2 1689.73   41.90
   0   4   2 1609.14   38.70
   0   4   2 1683.03   40.80
   0   4   2 1674.53   41.90
  -1  -4  -2  375.06   10.10
  -1  -4  -2  390.96    9.70
  -1  -4  -2  389.46    9.30
   1   4   2  375.06    9.30
   1   4   2  379.86    9.60
   1   4   2  381.56   10.10
   1   4   2  388.66   10.10
  -2  -4  -2  423.76   10.10
  -2  -4  -2  429.96   10.60
  -2  -4  -2  413.06   10.50
   2   4   2  425.36   10.60
   2   4   2  417.16   10.10
   2   4   2  410.86   11.30
   2   4   2  423.76   11.20
  -3  -4  -2  104.99    3.70
  -3  -4  -2  109.19    3.20
  -3  -4  -2  112.79    3.80
   3   4   2  106.99    3.60
   3   4   2  112.59    3.80
   3   4   2  102.79    4.40
   3   4   2  110.59    3.20
  -4  -4  -2  130.49    4.30
  -4  -4  -2  126.89    4.40
   4   4   2  124.49    3.60
   4   4   2  125.39    5.10
   4   4   2  131.79    4.30
   4   4   2  119.89    4.00
  -5  -4  -2 1045.80   24.90
  -5  -4  -2 1032.50   24.90
   5   4   2 1032.60   27.00
   5   4   2 1037.70   26.90
   5   4   2 1025.60   24.20
   5   4   2 1054.59   24.50
  -6  -4  -2  346.57    9.80
  -6  -4  -2  354.46    9.60
   6   4   2  355.46   10.40
   6   4   2  358.76   11.20
   6   4   2  362.26    9.00
  -7  -4  -2    0.70    1.90
   7   4   2    5.90    1.80
   7   4   2    1.00    2.30
   7   4   2    0.10    1.20
  -8  -4  -2  191.38    6.70
   8   4   2  183.38    5.60
   8   4   2  196.98    8.40
  -9  -4  -2    1.60    2.20
   9   4   2    1.50    3.00
 -10  -4  -2    2.00    2.30
  10   4   2   -0.70    3.00
  11  -5  -2    7.70    2.80
 -11   5   2   10.10    2.30
  10  -5  -2   -2.40    2.20
 -10   5   2   -0.50    1.90
   9  -5  -2   52.59    4.30
  -9   5   2   52.99    3.70
   8  -5  -2  155.98    6.10
  -8   5   2  155.78    5.40
  -8   5   2  159.88    5.30
   7  -5  -2  214.08    6.90
  -7   5   2  203.98    6.40
  -7   5   2  220.48    6.40
   6  -5  -2  189.08    6.10
   6  -5  -2  201.38    5.30
  -6   5   2  192.28    5.80
  -6   5   2  194.98    5.80
   5  -5  -2   18.70    1.50
  -5   5   2   19.20    1.60
  -5   5   2   16.50    1.60
   4  -5  -2  150.28    4.50
  -4   5   2  143.99    4.70
  -4   5   2  156.68    4.70
   3  -5  -2  153.28    4.50
   3  -5  -2  153.48    5.30
  -3   5   2  152.78    4.60
  -3   5   2  144.19    4.70
   2  -5  -2   40.30    2.20
   2  -5  -2   31.10    2.00
   2  -5  -2   35.10    2.50
  -2   5   2   38.00    2.20
  -2   5   2   35.50    2.30
   1  -5  -2  364.66    9.10
   1  -5  -2  357.96    9.70
  -1   5   2  349.96    9.10
  -1   5   2  356.96    9.10
   0  -5  -2   31.20    1.80
   0  -5  -2   32.00    2.20
   0  -5  -2   29.90    1.80
   0   5   2   31.00    1.70
   0   5   2   32.00    1.90
   0   5   2   27.90    2.10
  -1  -5  -2 1998.60   51.89
  -1  -5  -2 2149.78   47.70
  -1  -5  -2 2073.69   48.00
   1   5   2 2124.79   51.79
   1   5   2 2056.19   50.79
   1   5   2 2020.80   47.90
   1   5   2 2074.99   47.60
  -2  -5  -2   19.90    1.70
  -2  -5  -2   17.00    1.50
  -2  -5  -2   15.60    1.60
   2   5   2   21.90    1.70
   2   5   2   19.60    1.60
   2   5   2   16.30    1.40
   2   5   2   14.70    1.70
  -3  -5  -2  102.59    3.20
  -3  -5  -2   95.69    3.70
  -3  -5  -2  102.29    3.70
   3   5   2   99.79    3.10
   3   5   2   96.99    3.70
   3   5   2   96.39    4.30
   3   5   2   96.29    3.50
  -4  -5  -2  890.91   21.60
  -4  -5  -2  885.51   21.10
  -4  -5  -2  948.51   21.80
   4   5   2  899.61   21.00
   4   5   2  887.81   23.10
   4   5   2  882.11   21.50
   4   5   2  886.51   23.40
  -5  -5  -2  285.07    7.90
  -5  -5  -2  288.67    7.90
   5   5   2  274.37    8.10
   5   5   2  262.37    9.00
   5   5   2  278.27    7.10
   5   5   2  266.37    7.40
  -6  -5  -2    2.20    1.40
  -6  -5  -2    1.50    1.70
   6   5   2   -2.40    2.10
   6   5   2    3.10    1.50
   6   5   2    1.00    1.10
  -7  -5  -2  266.47    8.50
   7   5   2  280.37   10.10
   7   5   2  273.67    7.30
   7   5   2  284.17    8.80
  -8  -5  -2   54.19    4.40
   8   5   2   51.79    4.50
  -9  -5  -2    2.00    2.20
   9   5   2    0.40    3.30
 -10  -5  -2   38.50    3.40
  10   5   2   39.00    5.00
  11  -6  -2    2.20    2.70
 -11   6   2   -0.80    2.20
  10  -6  -2   13.20    2.80
 -10   6   2    9.60    2.30
   9  -6  -2   33.00    3.20
  -9   6   2   29.70    2.60
   8  -6  -2   77.69    4.40
  -8   6   2   80.29    4.00
  -8   6   2   79.69    4.20
   7  -6  -2  212.38    6.90
  -7   6   2  212.28    6.70
  -7   6   2  226.58    6.70
   6  -6  -2    5.20    1.30
  -6   6   2    3.60    1.60
  -6   6   2    2.80    1.30
   5  -6  -2  226.68    6.10
   5  -6  -2  222.78    6.20
  -5   6   2  210.68    6.50
  -5   6   2  225.98    6.50
   4  -6  -2   11.40    1.40
  -4   6   2   12.10    1.50
   3  -6  -2  366.96   10.70
   3  -6  -2  376.66    9.90
   3  -6  -2  376.96    9.60
  -3   6   2  363.16    9.70
  -3   6   2  383.46    9.80
   2  -6  -2  911.71   21.30
   2  -6  -2  897.91   21.20
   2  -6  -2  869.91   23.00
  -2   6   2  859.81   21.20
   1  -6  -2   98.59    3.60
   1  -6  -2  107.09    3.60
   1  -6  -2  106.99    3.80
  -1   6   2   97.19    3.80
  -1   6   2  100.09    3.20
   0  -6  -2  744.83   19.20
   0  -6  -2  774.22   18.20
   0   6   2  750.52   18.90
   0   6   2  725.73   18.10
   0   6   2  749.13   19.20
  -1  -6  -2  401.16   10.40
  -1  -6  -2  447.66   11.30
  -1  -6  -2  405.16   10.80
   1   6   2  410.46   10.40
   1   6   2  419.96   11.30
   1   6   2  426.76   11.00
   1   6   2  419.16   10.70
  -2  -6  -2  252.77    6.80
  -2  -6  -2  267.47    7.40
  -2  -6  -2  257.27    7.00
   2   6   2  253.77    7.00
   2   6   2  255.97    6.70
   2   6   2  257.97    7.70
   2   6   2  250.87    7.10
  -3  -6  -2  656.93   15.60
  -3  -6  -2  592.34   15.40
  -3  -6  -2  621.44   15.00
   3   6   2  610.24   16.70
   3   6   2  624.84   15.50
   3   6   2  617.34   14.90
   3   6   2  629.24   16.30
  -4  -6  -2  211.28    5.80
  -4  -6  -2  223.38    6.50
  -4  -6  -2  216.18    6.50
   4   6   2  208.98    5.70
   4   6   2  213.18    6.40
   4   6   2  207.08    7.40
   4   6   2  211.48    6.30
  -5  -6  -2   29.00    2.40
  -5  -6  -2   26.00    2.20
   5   6   2   23.50    2.00
   5   6   2   22.60    2.80
   5   6   2   24.80    2.00
   5   6   2   22.80    2.20
  -6  -6  -2  256.67    7.90
   6   6   2  249.08    6.70
   6   6   2  247.18    7.70
   6   6   2  253.97    9.20
  -7  -6  -2   53.19    4.30
   7   6   2   55.09    2.80
   7   6   2   55.59    4.60
   7   6   2   48.40    3.40
  -8  -6  -2    6.20    2.40
   8   6   2    6.00    3.20
  -9  -6  -2    3.00    2.40
   9   6   2    1.20    3.30
 -11   7   2   -1.40    2.40
  10  -7  -2    2.60    2.30
 -10   7   2    3.20    2.30
   9  -7  -2  108.79    5.20
  -9   7   2  102.89    5.10
   8  -7  -2  114.29    4.80
  -8   7   2  104.09    5.00
   7  -7  -2   47.70    2.90
   7  -7  -2   40.40    2.60
  -7   7   2   45.30    3.40
  -7   7   2   45.50    3.70
   6  -7  -2  136.79    4.20
  -6   7   2  127.29    4.90
  -6   7   2  123.29    5.00
   5  -7  -2   45.90    2.80
  -5   7   2   54.79    3.20
  -5   7   2   47.20    3.40
   4  -7  -2  645.14   16.00
  -4   7   2  624.14   16.20
  -4   7   2  689.83   16.30
   3  -7  -2  360.16    9.30
   3  -7  -2  318.87    9.90
   3  -7  -2  341.37    9.00
  -3   7   2  324.37    9.10
   2  -7  -2    1.70    1.30
   2  -7  -2    1.40    1.20
   2  -7  -2   -0.50    1.30
  -2   7   2   -1.70    1.30
   1  -7  -2 1722.23   43.80
   1  -7  -2 1750.62   40.60
   1  -7  -2 1774.72   40.60
  -1   7   2 1690.23   40.60
   0  -7  -2   45.40    2.30
   0  -7  -2   48.20    3.10
   0  -7  -2   50.19    2.70
   0   7   2   47.40    2.60
   0   7   2   46.40    2.90
  -1  -7  -2  484.75   12.40
  -1  -7  -2  495.25   12.80
   1   7   2  470.95   12.30
   1   7   2  486.35   12.60
   1   7   2  480.35   12.00
   1   7   2  478.15   12.90
  -2  -7  -2 1023.10   25.90
   2   7   2 1023.10   24.60
   2   7   2 1010.10   24.10
   2   7   2 1023.70   26.20
   2   7   2 1041.20   25.90
  -3  -7  -2   83.59    4.00
   3   7   2   92.89    3.20
   3   7   2   68.59    4.40
   3   7   2   92.99    3.10
   3   7   2   82.99    3.70
  -4  -7  -2    6.20    1.70
  -4  -7  -2    7.30    1.60
   4   7   2    4.80    2.10
   4   7   2    6.60    1.60
   4   7   2    8.70    1.30
   4   7   2    6.30    1.30
  -5  -7  -2  109.09    4.80
  -5  -7  -2  113.69    4.60
   5   7   2  115.59    3.80
   5   7   2  112.79    5.80
   5   7   2  110.49    4.40
   5   7   2  109.09    4.30
  -6  -7  -2  153.58    6.00
   6   7   2  147.79    5.30
   6   7   2  157.98    7.20
   6   7   2  154.48    4.70
  -7  -7  -2    1.10    2.10
   7   7   2    0.60    2.70
   7   7   2    2.30    1.30
  -8  -7  -2    0.10    2.30
   8   7   2   -0.50    3.00
  -9  -7  -2    8.80    2.80
   9   7   2    3.80    3.60
  11  -8  -2   15.00    4.60
 -11   8   2   15.90    3.00
 -10   8   2   35.10    3.30
   9  -8  -2   24.20    2.50
  -9   8   2   24.30    2.90
   8  -8  -2  133.19    4.90
  -8   8   2  129.99    5.70
   7  -8  -2   14.50    1.60
  -7   8   2   11.90    2.30
   6  -8  -2  189.78    5.90
  -6   8   2  195.88    6.40
  -6   8   2  182.78    6.40
   5  -8  -2  927.41   22.40
  -5   8   2  972.40   22.80
  -5   8   2  884.91   22.60
   4  -8  -2  205.48    7.20
   4  -8  -2  205.58    6.30
  -4   8   2  205.88    6.60
   3  -8  -2   38.00    3.40
   3  -8  -2   45.80    3.20
   3  -8  -2   49.70    3.20
  -3   8   2   43.50    3.40
   2  -8  -2 1869.61   48.10
   2  -8  -2 1895.81   44.40
   2  -8  -2 1957.90   44.50
  -2   8   2 1852.31   44.40
   1  -8  -2   10.70    1.50
   1  -8  -2    9.00    1.70
   1  -8  -2   13.70    1.70
  -1   8   2   10.60    1.80
   0  -8  -2  110.69    4.50
   0  -8  -2  108.59    3.80
   0  -8  -2  110.79    4.10
   0   8   2  108.69    4.00
   0   8   2  108.89    4.30
  -1  -8  -2  201.78    5.90
  -1  -8  -2  199.18    6.00
  -1  -8  -2  201.58    6.40
   1   8   2  196.78    6.20
   1   8   2  194.68    6.30
   1   8   2  198.78    5.90
  -2  -8  -2  121.79    4.30
   2   8   2  118.39    5.00
   2   8   2  120.29    4.60
   2   8   2  125.79    3.70
   2   8   2  118.59    4.20
  -3  -8  -2   46.90    3.60
  -3  -8  -2   51.19    2.80
   3   8   2   47.40    3.90
   3   8   2   47.20    3.30
   3   8   2   46.70    2.20
   3   8   2   49.00    2.70
  -4  -8  -2  540.15   13.90
  -4  -8  -2  547.35   14.50
   4   8   2  565.24   15.80
   4   8   2  572.14   14.60
   4   8   2  565.34   13.70
   4   8   2  550.14   14.40
  -5  -8  -2  133.19    4.60
  -5  -8  -2  133.09    5.60
   5   8   2  129.59    6.50
   5   8   2  139.19    4.80
   5   8   2  130.59    4.40
   5   8   2  134.79    5.30
  -6  -8  -2   10.10    2.30
   6   8   2    7.40    1.50
   6   8   2    3.50    2.80
  -7  -8  -2    2.80    2.30
   7   8   2    5.00    3.00
  -8  -8  -2   16.60    3.00
   8   8   2    7.70    3.50
  -9  -8  -2    0.70    2.70
   9   8   2   -0.80    3.50
  10  -9  -2   -3.40    3.50
 -10   9   2    2.40    2.70
  -9   9   2  283.97    9.20
   8  -9  -2    5.80    1.50
  -8   9   2    3.50    2.30
  -7   9   2  252.47    8.20
   6  -9  -2  560.24   14.30
  -6   9   2  536.85   14.70
  -6   9   2  590.04   15.00
   5  -9  -2  337.97    9.20
   5  -9  -2  315.27   10.60
  -5   9   2  329.07    9.60
   4  -9  -2  132.39    5.80
   4  -9  -2  145.99    5.30
  -4   9   2  145.29    5.60
   3  -9  -2 1135.69   30.30
   3  -9  -2 1164.78   27.90
   3  -9  -2 1215.08   28.40
  -3   9   2 1121.29   28.00
   2  -9  -2   49.00    3.60
   2  -9  -2   52.59    3.30
   2  -9  -2   43.20    3.30
  -2   9   2   47.90    3.60
   1  -9  -2  139.19    5.30
   1  -9  -2  135.99    4.80
   1  -9  -2  146.39    5.10
  -1   9   2  137.69    5.20
  -1   9   2  142.19    4.50
   0  -9  -2   22.40    2.10
   0  -9  -2   24.80    2.30
   0  -9  -2   21.00    2.30
   0   9   2   21.70    1.90
   0   9   2   21.30    2.20
  -1  -9  -2   31.10    2.20
  -1  -9  -2   35.00    2.90
  -1  -9  -2   29.70    2.50
   1   9   2   33.70    3.00
   1   9   2   29.90    2.70
   1   9   2   33.50    3.20
  -2  -9  -2    1.80    1.40
   2   9   2    2.00    1.30
   2   9   2    1.90    1.60
   2   9   2    2.30    1.70
  -3  -9  -2  379.46   10.00
  -3  -9  -2  367.36   10.60
   3   9   2  384.36   10.50
   3   9   2  369.46    9.80
   3   9   2  372.16   11.30
  -4  -9  -2  343.87   10.10
  -4  -9  -2  330.07    9.20
   4   9   2  349.67    9.90
   4   9   2  342.77   11.00
   4   9   2  346.17    9.10
  -5  -9  -2    5.70    2.20
  -5  -9  -2    3.40    1.40
   5   9   2    4.20    1.50
   5   9   2    3.50    2.60
   5   9   2    4.40    1.20
  -6  -9  -2   19.70    2.90
   6   9   2   19.90    1.90
   6   9   2   21.30    3.60
  -7  -9  -2   20.70    3.10
   7   9   2   20.70    3.90
  -8  -9  -2    5.70    2.80
   8   9   2    2.90    3.50
  10 -10  -2  163.98    9.50
 -10  10   2  173.68    7.60
   9 -10  -2    6.20    3.50
  -9  10   2    6.80    2.80
   8 -10  -2  103.99    7.10
  -8  10   2  104.89    5.80
   7 -10  -2  270.77   10.10
  -7  10   2  260.67    8.70
   6 -10  -2   75.79    4.20
   6 -10  -2   74.79    5.50
  -6  10   2   76.49    4.90
   5 -10  -2  435.46   11.60
   5 -10  -2  417.46   13.10
  -5  10   2  422.36   11.90
   4 -10  -2 1406.56   32.60
   4 -10  -2 1324.47   35.50
  -4  10   2 1334.97   32.70
   3 -10  -2  227.18    7.30
   3 -10  -2  217.78    7.70
  -3  10   2  231.28    7.50
   2 -10  -2  245.38    7.90
   2 -10  -2  254.47    8.00
  -2  10   2  256.67    8.00
   1 -10  -2   41.30    3.70
   1 -10  -2   42.10    2.90
   1 -10  -2   50.59    3.40
  -1  10   2   40.20    2.60
  -1  10   2   29.30    2.60
   0 -10  -2   17.30    2.40
   0 -10  -2   20.80    2.20
   0 -10  -2   24.90    2.30
   0  10   2   22.30    2.00
   0  10   2   15.80    2.10
  -1 -10  -2   14.30    2.30
  -1 -10  -2   21.00    2.10
  -1 -10  -2   18.50    2.20
   1  10   2   18.30    2.00
   1  10   2   17.60    2.20
   1  10   2   18.30    2.20
  -2 -10  -2   54.29    3.40
   2  10   2   53.79    4.10
   2  10   2   45.80    3.80
   2  10   2   51.89    3.20
  -3 -10  -2  628.04   15.80
  -3 -10  -2  622.14   16.40
   3  10   2  630.94   17.40
   3  10   2  624.94   16.20
   3  10   2  613.14   15.60
  -4 -10  -2  137.99    6.20
  -4 -10  -2  146.79    5.20
   4  10   2  149.39    5.90
   4  10   2  146.79    5.00
   4  10   2  138.29    6.70
  -5 -10  -2    3.30    2.30
   5  10   2    4.60    1.60
   5  10   2    5.10    2.70
  -6 -10  -2    8.80    2.70
   6  10   2   13.90    3.40
   6  10   2   12.60    1.80
  -7 -10  -2   22.30    3.30
   7  10   2   17.60    4.00
  -8 -10  -2    2.30    3.00
   8  10   2    0.10    3.50
  10 -11  -2   11.30    4.20
 -10  11   2   10.30    3.30
   9 -11  -2  190.38    9.80
  -9  11   2  204.08    8.20
   8 -11  -2   97.99    7.20
  -8  11   2  103.59    6.10
   7 -11  -2    3.50    3.10
  -7  11   2    1.50    2.60
   6 -11  -2   64.69    4.40
   6 -11  -2   62.89    5.70
  -6  11   2   58.49    5.00
   5 -11  -2   34.40    3.00
   5 -11  -2   47.80    4.90
  -5  11   2   39.20    3.30
   4 -11  -2    0.80    2.30
   4 -11  -2    5.80    2.10
  -4  11   2    4.30    2.20
   3 -11  -2   62.89    4.60
   3 -11  -2   61.49    4.30
  -3  11   2   65.09    4.60
   2 -11  -2   -5.90    1.70
   2 -11  -2   -0.10    2.00
  -2  11   2    2.00    2.00
  -2  11   2    0.40    1.10
   1 -11  -2  102.79    5.10
   1 -11  -2   99.39    4.10
  -1  11   2   96.29    5.00
  -1  11   2   96.89    4.00
   0 -11  -2    0.50    2.00
   0 -11  -2    0.70    1.70
   0 -11  -2    2.10    1.30
   0  11   2    0.30    1.50
   0  11   2   -1.20    1.90
  -1 -11  -2    0.00    2.00
  -1 -11  -2    4.30    1.30
  -1 -11  -2    0.40    1.70
   1  11   2    1.40    1.80
   1  11   2   -1.00    1.90
   1  11   2    1.60    1.60
  -2 -11  -2  661.93   17.10
   2  11   2  668.23   18.30
   2  11   2  689.53   17.50
   2  11   2  658.73   16.80
  -3 -11  -2   99.39    4.50
  -3 -11  -2   99.99    5.60
   3  11   2   97.79    5.00
   3  11   2  101.29    4.40
   3  11   2  106.59    5.70
  -4 -11  -2   17.70    3.00
  -4 -11  -2   17.00    2.20
   4  11   2   11.50    1.90
   4  11   2   10.00    2.80
  -5 -11  -2   31.60    3.40
   5  11   2   35.50    3.10
   5  11   2   35.50    3.80
  -6 -11  -2   17.70    3.20
   6  11   2   17.90    3.60
  -7 -11  -2    8.40    3.10
   7  11   2    5.50    3.40
  10 -12  -2  160.48    9.90
 -10  12   2  166.48    8.30
   9 -12  -2   37.50    5.10
  -9  12   2   30.10    3.80
   8 -12  -2    5.50    3.70
  -8  12   2    8.30    3.10
   7 -12  -2    4.20    3.40
  -7  12   2    3.00    2.80
   6 -12  -2   68.09    6.00
  -6  12   2   63.49    5.50
   5 -12  -2   21.60    2.80
   5 -12  -2   20.30    3.30
  -5  12   2   19.20    2.90
   4 -12  -2  328.27   10.10
   4 -12  -2  325.47   10.70
  -4  12   2  321.57   10.20
   3 -12  -2    0.70    2.30
   3 -12  -2    2.80    2.30
  -3  12   2    3.10    2.40
  -3  12   2    8.30    1.20
   2 -12  -2  457.45   13.20
   2 -12  -2  475.25   13.20
  -2  12   2  463.85   12.30
  -2  12   2  466.75   13.10
   1 -12  -2   31.10    3.10
   1 -12  -2   35.20    3.00
  -1  12   2   32.50    3.20
  -1  12   2   35.20    3.00
   0 -12  -2    1.30    1.50
   0 -12  -2    1.50    2.20
   0  12   2    0.20    2.10
   0  12   2    3.00    1.70
  -1 -12  -2  364.56   11.20
   1  12   2  376.26   11.10
   1  12   2  378.96   11.10
   2  12   2  278.17    8.80
   2  12   2  233.78    7.90
   2  12   2  271.47    9.00
  -3 -12  -2    4.10    2.50
  -3 -12  -2    0.80    1.90
   3  12   2   -0.30    2.30
   3  12   2    1.90    1.80
   3  12   2    1.10    2.10
  -4 -12  -2   -3.30    2.40
   4  12   2    2.90    1.80
   4  12   2    0.10    2.60
  -5 -12  -2   96.19    6.30
   5  12   2   93.59    4.40
   5  12   2   99.99    6.80
  -6 -12  -2    4.10    3.10
   6  12   2    6.00    3.30
  -7 -12  -2    3.00    3.10
   7  12   2    1.00    3.50
   9 -13  -2    8.80    4.40
  -9  13   2    7.40    3.50
   8 -13  -2    0.40    3.60
  -8  13   2    3.30    3.20
   7 -13  -2   -2.40    3.30
  -7  13   2   -2.60    2.90
   6 -13  -2  160.68    8.00
  -6  13   2  153.78    7.50
   5 -13  -2    0.60    2.40
   5 -13  -2    0.60    2.70
  -5  13   2   -0.50    2.60
   4 -13  -2   47.90    4.00
   4 -13  -2   49.99    4.00
  -4  13   2   66.99    5.50
   3 -13  -2   41.10    3.70
   3 -13  -2   44.10    4.30
  -3  13   2   41.50    2.30
  -3  13   2   41.10    3.60
   2 -13  -2    0.90    1.90
   2 -13  -2    0.00    2.40
  -2  13   2    2.70    1.50
  -2  13   2    1.40    2.40
   1 -13  -2  111.19    4.70
   1 -13  -2  115.69    6.30
  -1  13   2  105.59    6.10
  -1  13   2  113.39    4.70
   0 -13  -2  234.78    7.30
   0 -13  -2  235.78    8.70
   0  13   2  224.88    7.70
   0  13   2  240.58    8.50
  -1 -13  -2  407.66   12.30
   1  13   2  404.86   12.10
   1  13   2  404.56   12.00
   2  13   2    3.20    2.50
   2  13   2    4.70    2.50
  -3 -13  -2    9.80    2.90
   3  13   2    9.80    2.80
   3  13   2   13.30    2.30
  -4 -13  -2  103.99    6.60
   4  13   2  107.39    6.60
   4  13   2  100.79    4.80
  -5 -13  -2    1.40    3.00
   5  13   2    4.20    3.20
  -6 -13  -2    3.30    3.20
   6  13   2    6.60    3.50
   9 -14  -2   -0.40    4.10
  -9  14   2   -1.20    3.40
   8 -14  -2   -2.60    3.70
  -8  14   2   -1.30    3.30
   7 -14  -2  186.38    9.20
  -7  14   2  169.58    8.40
   6 -14  -2   25.80    3.90
  -6  14   2   21.40    3.60
   5 -14  -2   17.60    3.60
   5 -14  -2   13.50    3.10
  -5  14   2   19.00    3.30
   4 -14  -2    7.80    3.00
   4 -14  -2   10.10    3.00
  -4  14   2    7.90    3.10
   3 -14  -2    3.90    2.40
   3 -14  -2    1.40    2.80
  -3  14   2    2.20    2.70
  -3  14   2    3.60    1.40
   2 -14  -2    0.90    2.00
   2 -14  -2   -1.60    2.70
  -2  14   2    2.50    1.60
  -2  14   2    2.50    1.50
  -2  14   2   -2.40    2.70
   1 -14  -2  559.64   15.60
   1 -14  -2  532.85   15.00
  -1  14   2  550.14   15.60
  -1  14   2  550.74   14.90
   0 -14  -2  290.07    8.60
   0 -14  -2  280.37    9.90
   0  14   2  276.47    9.00
   0  14   2  279.87    9.90
   1  14   2    1.80    2.80
   1  14   2    0.30    2.20
   2  14   2   97.59    6.30
   2  14   2   88.39    5.60
  -3 -14  -2  121.69    7.30
   3  14   2  118.39    6.60
  -4 -14  -2   -0.30    3.10
   4  14   2   -1.50    2.80
  -5 -14  -2   21.70    4.00
   5  14   2   19.70    3.90
   8 -15  -2  106.09    8.60
  -8  15   2  122.59    8.00
   7 -15  -2   33.90    4.60
  -7  15   2   37.20    4.40
   6 -15  -2   73.39    6.90
  -6  15   2   89.29    7.00
   5 -15  -2   -1.10    2.90
   5 -15  -2    0.70    2.90
  -5  15   2   -2.20    3.10
   4 -15  -2   -1.00    2.90
   4 -15  -2   -1.10    2.80
  -4  15   2    2.30    3.00
   3 -15  -2   -0.70    2.50
   3 -15  -2    0.50    3.00
  -3  15   2    3.90    3.00
   2 -15  -2   -3.20    2.80
   2 -15  -2    2.40    2.10
  -2  15   2    2.90    1.70
  -2  15   2   -1.30    2.80
   1 -15  -2  557.84   15.80
   1 -15  -2  588.24   16.50
  -1  15   2  572.44   15.60
  -1  15   2  588.24   16.60
   0 -15  -2  136.69    7.40
   0  15   2  129.49    5.90
   0  15   2  134.49    7.40
   1  15   2  352.26   11.40
   1  15   2  373.96   12.00
  -2 -15  -2   88.29    7.20
   2  15   2   76.29    5.70
  -3 -15  -2    9.80    3.70
   3  15   2   14.00    3.30
  -4 -15  -2   51.69    5.10
   4  15   2   54.59    4.90
   7 -16  -2   48.10    5.50
  -7  16   2   45.70    5.00
   6 -16  -2    1.70    3.50
  -6  16   2   -0.20    3.50
   5 -16  -2    0.30    3.20
  -5  16   2    6.70    3.50
   4 -16  -2    4.50    3.40
   4 -16  -2    5.90    3.10
  -4  16   2    4.00    3.30
   3 -16  -2   22.90    3.20
   3 -16  -2   23.70    3.80
  -3  16   2   22.80    3.80
   2 -16  -2  592.14   17.30
   2 -16  -2  634.64   17.80
  -2  16   2  632.14   17.80
   1 -16  -2    6.80    3.20
  -1  16   2    3.40    2.10
  -1  16   2   -1.60    3.00
   0  16   2  137.69    6.20
   0  16   2  140.89    7.90
   1  16   2   10.40    2.80
   1  16   2    9.20    3.30
  -2 -16  -2   56.19    5.00
   2  16   2   66.49    5.60
  -3 -16  -2   90.09    8.00
   3  16   2   74.49    6.40
   6 -17  -2    7.70    3.80
  -6  17   2    7.80    4.00
   5 -17  -2   -1.80    3.40
  -5  17   2    1.50    3.70
   4 -17  -2  124.79    7.70
   4 -17  -2  114.99    6.80
  -4  17   2  114.99    8.10
   3 -17  -2  609.24   17.20
   3 -17  -2  547.95   17.00
  -3  17   2  586.74   17.30
   2 -17  -2    6.80    3.40
  -2  17   2    3.30    3.50
  -1  17   2  351.76   12.60
   0  17   2   14.40    3.80
   0  17   2   19.30    2.90
   1  17   2    2.00    2.70
  -2 -17  -2  135.69    9.20
   2  17   2  130.29    7.20
   5 -18  -2  163.68    8.40
  -5  18   2  152.48    9.50
  -4  18   2  249.28   11.00
  -3  18   2    6.40    4.20
  -2  18   2  260.37   11.30
  -1  18   2   21.30    4.50
   0  18   2   10.20    4.10
  -1 -18  -2   41.70    5.30
   1  20  -3    6.30    3.20
  -1 -20   3    7.00    4.00
   0  20  -3   -1.70    3.40
   0  20  -3    1.90    3.10
   0 -20   3   -1.10    3.80
  -1  20  -3   16.70    4.00
   1 -20   3   17.90    4.30
  -2  20  -3   60.09    5.50
   2 -20   3   57.49    5.40
  -3  20  -3   -3.00    3.60
   3 -20   3    1.60    3.70
  -4  20  -3  199.28   10.40
   4 -20   3  198.78   10.00
   3  19  -3  133.69    7.20
   3  19  -3  121.19    7.60
  -3 -19   3  115.09    8.50
   2  19  -3    8.80    3.20
  -2 -19   3    5.20    3.70
   1  19  -3   55.79    4.70
  -1 -19   3   50.49    5.00
   0  19  -3   72.09    6.70
   0  19  -3   73.89    6.20
   0 -19   3   66.39    5.30
  -1  19  -3   91.49    7.20
  -1  19  -3   91.09    6.60
   1 -19   3   90.49    7.60
  -2  19  -3   -2.90    3.30
   2 -19   3    2.90    3.50
  -3  19  -3  312.37   11.90
   3 -19   3  322.67   11.80
   3 -19   3  309.77   10.80
  -4  19  -3   -5.00    3.50
   4 -19   3   -2.10    3.10
   4 -19   3   -2.10    3.50
  -5  19  -3  135.59    8.80
   5 -19   3  122.19    7.90
  -6  19  -3   79.69    6.30
   4  18  -3  123.39    7.80
   4  18  -3  119.29    6.70
  -4 -18   3  112.39    7.80
   3  18  -3   32.00    3.70
  -3 -18   3   30.00    4.30
   2  18  -3  146.79    7.20
  -2 -18   3  148.69    8.30
   1  18  -3  177.98    8.30
   1  18  -3  193.98    8.00
  -1 -18   3  169.38    8.70
   0  18  -3   85.39    6.60
   0  18  -3   92.09    6.10
   0 -18   3   93.19    7.10
  -1  18  -3    4.10    3.00
  -1  18  -3    1.90    2.80
   1 -18   3    7.00    3.40
  -2  18  -3  317.07   11.30
   2 -18   3  312.57   10.10
   2 -18   3  312.07   11.30
  -3  18  -3    3.80    3.40
   3 -18   3    6.80    2.90
   3 -18   3    4.80    3.40
  -4  18  -3  200.18    9.30
   4 -18   3  202.58    9.10
   4 -18   3  184.88    8.50
  -5  18  -3  188.68    9.30
  -6  18  -3    9.30    3.90
  -7  18  -3   -5.80    3.80
   5  17  -3  209.28    9.80
   5  17  -3  227.18    8.60
  -5 -17   3  217.68    9.40
   4  17  -3    2.50    3.00
   4  17  -3    6.10    2.70
  -4 -17   3    3.50    3.30
   3  17  -3  208.68    8.20
  -3 -17   3  206.68    8.90
   2  17  -3  163.78    7.10
  -2 -17   3  148.09    7.80
   1  17  -3  100.89    6.30
   1  17  -3   91.59    5.90
  -1 -17   3   92.99    6.70
   0  17  -3   57.49    5.30
   0  17  -3   54.99    4.30
   0 -17   3   53.09    4.40
  -1  17  -3  577.74   16.30
  -1  17  -3  565.44   16.00
   1 -17   3  556.14   16.20
   1 -17   3  564.24   15.50
  -2  17  -3    3.20    2.70
  -2  17  -3    1.80    2.90
   2 -17   3    2.50    3.00
   2 -17   3    2.70    2.20
  -3  17  -3  312.17   11.10
   3 -17   3  332.17   11.20
  -4  17  -3   86.59    6.90
   4 -17   3   87.89    6.60
  -5  17  -3    0.70    3.30
   5 -17   3   -1.20    3.10
  -6  17  -3    4.20    3.50
  -7  17  -3   26.70    4.40
   6  16  -3  157.28    8.70
   6  16  -3  148.59    6.90
  -6 -16   3  156.88    7.80
   5  16  -3   -0.10    2.40
   5  16  -3    1.50    3.10
  -5 -16   3    2.20    2.90
   4  16  -3  265.97    9.00
  -4 -16   3  266.97    9.80
   3  16  -3  154.48    6.70
  -3 -16   3  137.19    7.30
   2  16  -3    9.90    2.70
   2  16  -3    9.60    2.70
  -2 -16   3    8.00    3.00
   1  16  -3  198.98    7.60
   1  16  -3  207.28    7.90
  -1 -16   3  191.28    8.20
   0  16  -3  499.65   14.00
   0  16  -3  483.35   14.10
   0 -16   3  489.05   13.00
   0 -16   3  493.25   14.30
  -1  16  -3    1.50    2.60
  -1  16  -3    3.10    2.50
   1 -16   3    0.60    1.50
   1 -16   3    1.30    2.80
   1 -16   3    2.70    1.90
  -2  16  -3  403.56   11.60
  -2  16  -3  390.66   12.30
  -2  16  -3  383.66   11.90
   2 -16   3  402.86   12.30
  -3  16  -3    0.20    1.50
  -3  16  -3   -1.80    2.70
   3 -16   3   -2.60    2.80
  -4  16  -3    7.60    3.00
   4 -16   3    0.00    2.80
  -5  16  -3   10.80    3.30
   5 -16   3    9.00    3.00
  -6  16  -3   56.19    4.90
  -7  16  -3   46.20    4.70
  -8  16  -3   68.79    5.50
   7  15  -3  164.78    9.10
   6  15  -3   -0.90    3.30
   6  15  -3    3.80    2.40
  -6 -15   3    4.20    2.80
   5  15  -3  257.57    8.60
   5  15  -3  249.08   10.10
  -5 -15   3  237.88    9.10
   4  15  -3  114.19    5.80
  -4 -15   3  103.79    6.50
   3  15  -3   96.29    5.30
  -3 -15   3   93.69    6.10
   2  15  -3  112.29    5.60
   2  15  -3  103.59    5.60
  -2 -15   3  109.39    6.20
   1  15  -3  173.38    7.00
   1  15  -3  173.98    6.90
  -1 -15   3  171.08    7.40
   0  15  -3   42.70    3.60
   0  15  -3   42.20    3.50
   0 -15   3   40.80    2.60
   0 -15   3   31.30    2.60
   0 -15   3   38.40    3.70
  -1  15  -3  273.77    9.10
  -1  15  -3  265.97    8.40
  -1  15  -3  264.87    8.90
   1 -15   3  261.47    9.20
   1 -15   3  248.88    8.10
  -2  15  -3   15.80    2.90
  -2  15  -3   17.10    2.10
  -2  15  -3   17.00    2.80
   2 -15   3   15.10    3.00
  -3  15  -3    9.40    1.80
  -3  15  -3    7.90    2.80
   3 -15   3    8.80    2.90
  -4  15  -3   45.50    3.30
  -4  15  -3   34.40    3.80
   4 -15   3   36.70    3.70
  -5  15  -3    0.20    2.80
   5 -15   3   -3.10    2.60
  -6  15  -3  374.16   12.10
  -7  15  -3  108.09    7.20
  -8  15  -3   21.50    4.10
  -9  15  -3   -1.00    3.60
   7  14  -3    1.70    2.40
   7  14  -3   -0.40    3.10
   6  14  -3  291.37    9.40
   6  14  -3  288.17   11.10
  -6 -14   3  284.57    9.70
   5  14  -3   36.10    3.20
   5  14  -3   34.10    3.80
  -5 -14   3   32.10    3.40
   4  14  -3  196.88    7.10
  -4 -14   3  189.48    7.60
   3  14  -3  122.39    5.60
   3  14  -3  123.09    5.60
  -3 -14   3  118.29    6.10
   2  14  -3   98.19    5.20
   2  14  -3  108.99    5.30
  -2 -14   3   99.99    5.70
   1  14  -3   80.19    4.80
   1  14  -3   82.79    4.80
  -1 -14   3   75.79    5.30
   0  14  -3  282.77    8.90
   0  14  -3  281.77    9.00
   0 -14   3  279.47    7.90
   0 -14   3  281.17    7.90
   0 -14   3  269.77    9.10
  -1  14  -3   37.10    3.20
  -1  14  -3   37.70    3.20
  -1  14  -3   36.10    3.10
   1 -14   3   35.80    3.30
  -2  14  -3    1.40    1.50
  -2  14  -3    1.20    2.20
  -2  14  -3    2.60    2.10
   2 -14   3    1.30    2.40
  -3  14  -3   21.10    3.00
  -3  14  -3   24.30    2.20
   3 -14   3   15.20    2.90
  -4  14  -3   69.89    3.70
  -4  14  -3   64.69    5.30
   4 -14   3   68.99    5.30
  -5  14  -3  110.69    4.70
  -5  14  -3  106.69    6.30
   5 -14   3  106.79    6.10
  -6  14  -3  205.68    8.30
  -7  14  -3    7.80    3.10
  -8  14  -3    7.40    3.40
  -9  14  -3    6.30    3.60
   8  13  -3   -0.60    3.50
  -8 -13   3    0.40    2.50
   7  13  -3  339.17   10.50
   7  13  -3  346.17   12.50
   6  13  -3    5.70    3.00
   6  13  -3    6.60    2.30
  -6 -13   3    4.50    2.50
   5  13  -3   -0.10    2.00
  -5 -13   3   -0.20    2.20
   4  13  -3   51.29    4.20
  -4 -13   3   44.40    3.60
   3  13  -3   35.30    2.90
   3  13  -3   34.00    3.00
  -3 -13   3   27.50    3.00
   2  13  -3  190.28    6.60
   2  13  -3  195.38    6.70
  -2 -13   3  179.38    7.00
   1  13  -3  301.87    9.00
   1  13  -3  304.27    9.00
  -1 -13   3  288.87    9.20
   0  13  -3  202.48    7.00
   0  13  -3  196.08    6.80
   0 -13   3  193.58    5.90
   0 -13   3  201.48    5.90
   0 -13   3  195.48    7.10
  -1  13  -3   41.50    3.00
  -1  13  -3   41.40    3.80
  -1  13  -3   38.80    3.10
   1 -13   3   43.20    3.20
  -2  13  -3   46.40    3.40
  -2  13  -3   63.29    3.20
  -2  13  -3   56.89    4.10
   2 -13   3   49.60    3.60
  -3  13  -3   84.29    5.10
  -3  13  -3   85.59    3.80
   3 -13   3   79.39    5.00
  -4  13  -3  150.28    5.40
  -4  13  -3  139.29    6.40
   4 -13   3  151.38    6.40
  -5  13  -3   72.89    3.80
  -5  13  -3   71.29    5.30
   5 -13   3   64.69    5.00
  -6  13  -3  198.98    7.90
  -6  13  -3  198.78    6.60
   6 -13   3  204.88    7.50
   6 -13   3  194.78    6.80
  -7  13  -3   -0.10    2.70
   7 -13   3    2.20    2.00
  -8  13  -3   61.09    4.70
   8 -13   3   64.79    4.50
  -9  13  -3    5.80    3.40
   8  12  -3  241.28   10.50
   8  12  -3  247.28    8.30
  -8 -12   3  237.58    8.40
   7  12  -3    9.50    3.40
   7  12  -3   11.10    2.50
   6  12  -3   38.10    4.20
   6  12  -3   37.40    3.20
  -6 -12   3   32.20    3.00
   5  12  -3   37.80    3.10
  -5 -12   3   29.10    2.90
   4  12  -3   35.40    2.70
   4  12  -3   41.80    3.70
  -4 -12   3   32.50    2.90
   3  12  -3   45.50    3.80
   3  12  -3   48.40    3.50
  -3 -12   3   49.00    4.10
   2  12  -3  226.08    7.20
   2  12  -3  232.28    7.30
  -2 -12   3  220.88    7.40
   1  12  -3  153.28    5.60
   1  12  -3  146.39    5.50
  -1 -12   3  139.49    5.70
   0  12  -3   64.59    4.00
   0  12  -3   65.79    3.90
   0 -12   3   66.99    4.20
   0 -12   3   69.99    2.80
  -1  12  -3    0.70    1.70
  -1  12  -3    1.30    1.70
  -1  12  -3    2.40    1.30
   1 -12   3    1.70    1.80
  -2  12  -3  242.28    7.20
  -2  12  -3  232.38    7.70
  -2  12  -3  235.38    7.60
   2 -12   3  240.58    7.70
  -3  12  -3    1.90    1.20
  -3  12  -3    2.80    1.80
  -3  12  -3    0.90    2.00
   3 -12   3    0.20    1.90
  -4  12  -3  115.59    5.50
  -4  12  -3  117.59    4.60
   4 -12   3  105.69    5.30
  -5  12  -3  124.89    5.90
  -5  12  -3  128.29    4.90
   5 -12   3  128.89    5.70
   5 -12   3  123.09    4.90
  -6  12  -3   71.49    5.40
  -6  12  -3   83.39    3.90
   6 -12   3   70.09    4.80
   6 -12   3   77.89    4.10
  -7  12  -3   45.00    3.50
  -7  12  -3   37.80    3.70
   7 -12   3   48.10    3.90
  -8  12  -3    4.40    3.00
   8 -12   3    9.60    2.40
  -9  12  -3   69.89    6.30
   9 -12   3   72.89    5.30
 -10  12  -3   80.29    7.00
   9  11  -3  222.18   10.30
  -9 -11   3  229.58    8.10
   8  11  -3    7.50    2.40
   8  11  -3    3.90    3.10
  -8 -11   3    3.60    2.40
   7  11  -3    8.20    2.20
   7  11  -3    5.60    3.10
   6  11  -3   55.69    5.60
   6  11  -3   69.09    4.20
  -6 -11   3   62.89    4.20
   5  11  -3   87.99    4.50
  -5 -11   3   86.49    4.70
   4  11  -3  455.25   12.00
   4  11  -3  450.75   12.30
  -4 -11   3  457.65   12.50
  -4 -11   3  483.55   12.40
  -4 -11   3  459.55   12.40
   3  11  -3  178.88    5.90
   3  11  -3  183.48    6.20
  -3 -11   3  177.48    6.30
  -3 -11   3  188.28    6.30
   2  11  -3  227.08    7.00
   2  11  -3  236.58    7.20
  -2 -11   3  229.38    7.30
  -2 -11   3  242.28    7.30
   1  11  -3   24.10    2.20
   1  11  -3   17.20    2.00
  -1 -11   3   14.20    2.00
  -1 -11   3   23.80    2.30
   0  11  -3   54.19    3.40
   0  11  -3   49.50    3.50
   0 -11   3   53.49    2.40
   0 -11   3   52.29    3.70
   0 -11   3   48.50    3.40
  -1  11  -3   78.59    4.10
  -1  11  -3   78.99    4.10
  -1  11  -3   83.79    3.50
   1 -11   3   90.29    4.10
   1 -11   3   82.09    4.20
  -2  11  -3  173.48    6.10
  -2  11  -3  188.68    5.70
  -2  11  -3  168.28    6.20
   2 -11   3  178.78    6.20
  -3  11  -3  406.06   11.00
  -3  11  -3  392.36   11.00
  -3  11  -3  395.76   11.10
   3 -11   3  395.26   11.00
  -4  11  -3   53.09    3.10
  -4  11  -3   43.90    4.10
   4 -11   3   46.10    3.80
  -5  11  -3  139.69    5.00
  -5  11  -3  124.39    5.70
   5 -11   3  126.59    5.40
   5 -11   3  127.09    4.90
  -6  11  -3    6.40    1.70
  -6  11  -3    2.20    2.30
   6 -11   3    2.20    2.20
   6 -11   3    7.40    1.80
  -7  11  -3    0.90    1.70
  -7  11  -3   -3.30    2.40
   7 -11   3    0.30    1.90
  -8  11  -3   85.99    6.00
   8 -11   3  101.39    5.30
  -9  11  -3  202.18    8.30
   9 -11   3  217.78    8.20
 -10  11  -3    6.30    3.30
   9  10  -3   14.50    3.80
  -9 -10   3   12.00    2.60
   8  10  -3    5.40    3.20
   8  10  -3    2.70    2.10
  -8 -10   3   -0.10    2.10
   7  10  -3   11.70    2.30
   7  10  -3   10.30    1.50
   7  10  -3    6.20    2.90
   6  10  -3   14.30    2.20
   6  10  -3    8.50    2.80
  -6 -10   3   10.20    2.00
   5  10  -3  209.08    6.70
   5  10  -3  210.48    6.20
  -5 -10   3  203.68    6.70
  -5 -10   3  212.98    6.50
  -5 -10   3  201.48    6.80
   4  10  -3  493.05   12.70
   4  10  -3  485.15   13.10
  -4 -10   3  518.75   13.00
  -4 -10   3  509.15   13.30
  -4 -10   3  502.35   13.10
   3  10  -3  455.75   11.90
   3  10  -3  452.45   12.20
  -3 -10   3  489.65   12.20
  -3 -10   3  447.46   12.10
  -3 -10   3  478.55   12.30
   2  10  -3    1.60    1.50
   2  10  -3   -0.50    1.20
  -2 -10   3    1.70    1.50
  -2 -10   3    1.80    1.40
   1  10  -3    2.70    1.40
   1  10  -3    2.10    1.40
  -1 -10   3    1.20    1.50
  -1 -10   3    1.90    1.30
   0  10  -3  414.16   10.90
   0  10  -3  403.66   10.90
   0 -10   3  393.26   10.90
   0 -10   3  428.86   11.10
   0 -10   3  421.86   11.00
  -1  10  -3  262.47    7.50
  -1  10  -3  253.97    7.60
  -1  10  -3  251.87    7.60
   1 -10   3  271.77    7.70
   1 -10   3  253.37    7.60
  -2  10  -3  481.55   12.60
  -2  10  -3  477.45   12.60
   2 -10   3  480.75   12.60
  -3  10  -3    3.00    1.60
  -3  10  -3    0.00    1.60
  -3  10  -3    1.00    1.00
   3 -10   3    0.70    1.40
   3 -10   3    1.70    1.60
  -4  10  -3  716.53   18.50
  -4  10  -3  716.83   17.90
   4 -10   3  699.33   17.70
   4 -10   3  688.03   18.20
  -5  10  -3    6.90    1.60
  -5  10  -3    5.50    2.10
   5 -10   3    8.90    1.70
   5 -10   3    9.20    1.90
  -6  10  -3    4.90    1.60
  -6  10  -3    0.20    2.20
   6 -10   3    1.70    1.80
   6 -10   3    4.00    1.70
  -7  10  -3  279.97    9.10
  -7  10  -3  286.07    8.80
   7 -10   3  285.97    9.10
  -8  10  -3  152.08    6.80
   8 -10   3  162.78    6.80
  -9  10  -3    4.60    2.80
   9 -10   3    0.20    2.50
 -10  10  -3  294.57   10.10
  10 -10   3  281.97   10.70
  10   9  -3   19.80    4.20
 -10  -9   3   17.80    2.70
   9   9  -3   57.09    4.30
   9   9  -3   64.99    5.50
  -9  -9   3   56.59    4.20
   8   9  -3    0.00    1.90
   8   9  -3   -1.30    1.50
   8   9  -3    2.90    2.90
  -8  -9   3   -0.50    1.80
   7   9  -3  110.19    4.30
   7   9  -3  112.89    4.90
   7   9  -3  113.99    6.60
   6   9  -3   58.29    3.70
   6   9  -3   55.69    5.10
   6   9  -3   57.19    2.80
  -6  -9   3   62.69    3.30
  -6  -9   3   59.79    3.60
  -6  -9   3   56.49    3.60
   5   9  -3  197.78    6.60
   5   9  -3  211.68    6.00
  -5  -9   3  220.18    6.40
  -5  -9   3  215.28    6.60
  -5  -9   3  210.08    6.70
   4   9  -3  602.04   15.60
   4   9  -3  614.04   15.10
  -4  -9   3  634.34   15.80
  -4  -9   3  613.14   15.50
  -4  -9   3  639.04   15.50
   3   9  -3  158.78    4.90
   3   9  -3  160.68    5.40
  -3  -9   3  169.58    5.40
  -3  -9   3  169.38    5.30
  -3  -9   3  154.28    5.30
   2   9  -3    7.30    1.60
   2   9  -3    6.20    1.30
  -2  -9   3    6.50    1.50
  -2  -9   3    7.40    1.40
  -2  -9   3    3.50    1.40
   1   9  -3   42.50    2.70
   1   9  -3   40.80    2.80
  -1  -9   3   42.40    2.70
  -1  -9   3   36.90    2.80
   0   9  -3   59.39    3.10
   0   9  -3   59.89    3.10
   0  -9   3   63.49    3.20
   0  -9   3   45.90    2.40
   0  -9   3   59.39    3.20
  -1   9  -3 1377.76   33.20
  -1   9  -3 1409.86   33.20
   1  -9   3 1406.06   33.20
   1  -9   3 1430.16   33.20
  -2   9  -3   10.10    1.60
  -2   9  -3   11.00    1.80
   2  -9   3   13.00    1.80
   2  -9   3    9.00    1.60
  -3   9  -3 1426.86   33.90
  -3   9  -3 1398.26   33.80
   3  -9   3 1386.66   35.40
   3  -9   3 1457.75   33.90
   3  -9   3 1474.75   33.90
  -4   9  -3   41.40    2.80
  -4   9  -3   42.40    3.50
   4  -9   3   45.10    2.70
   4  -9   3   47.20    3.00
   4  -9   3   37.40    3.20
  -5   9  -3  254.57    7.80
  -5   9  -3  263.37    8.00
   5  -9   3  268.47    7.90
   5  -9   3  261.17    7.90
   5  -9   3  254.47    7.60
  -6   9  -3  251.77    7.70
  -6   9  -3  253.17    7.80
  -6   9  -3  232.08    7.90
   6  -9   3  251.07    7.40
   6  -9   3  253.57    8.00
  -7   9  -3  310.67    9.60
  -7   9  -3  318.27    9.70
   7  -9   3  322.77   10.10
  -8   9  -3   22.30    3.00
   8  -9   3   28.30    3.20
  -9   9  -3  347.97   10.70
   9  -9   3  337.27   11.50
 -10   9  -3   -2.60    2.80
  10  -9   3    2.20    2.80
  10   8  -3    0.30    3.30
 -10  -8   3    1.70    2.10
   9   8  -3    3.80    3.00
   9   8  -3    2.60    2.00
   9   8  -3    1.40    2.00
  -9  -8   3    1.40    1.90
   8   8  -3   56.49    4.10
   8   8  -3   58.89    5.70
   8   8  -3   53.89    3.70
  -8  -8   3   64.09    3.80
   7   8  -3   38.80    3.50
   7   8  -3   36.60    2.90
   7   8  -3   35.10    3.80
  -7  -8   3   38.80    2.80
   6   8  -3  225.08    8.40
   6   8  -3  216.98    6.60
   6   8  -3  222.48    7.00
  -6  -8   3  224.68    6.50
  -6  -8   3  218.38    6.60
  -6  -8   3  230.18    7.10
   5   8  -3  577.54   14.90
   5   8  -3  574.64   15.40
  -5  -8   3  610.44   14.70
  -5  -8   3  600.84   15.20
  -5  -8   3  603.64   14.70
   4   8  -3  315.57    8.90
   4   8  -3  324.57    8.40
  -4  -8   3  333.97    8.70
  -4  -8   3  328.37    8.70
  -4  -8   3  332.07    9.00
   3   8  -3   83.69    3.60
   3   8  -3   91.19    3.20
  -3  -8   3   95.89    3.70
  -3  -8   3   95.29    3.50
  -3  -8   3   84.39    3.50
   2   8  -3    9.10    1.30
   2   8  -3   10.20    1.50
  -2  -8   3   13.50    1.50
  -2  -8   3    7.90    1.40
  -2  -8   3    7.60    1.40
   1   8  -3 1228.28   29.50
   1   8  -3 1208.18   29.50
  -1  -8   3 1225.58   29.60
  -1  -8   3 1265.27   29.70
  -1  -8   3 1346.87   29.80
   0   8  -3  122.99    4.20
   0   8  -3  123.99    4.20
   0  -8   3  124.09    4.30
   0  -8   3  128.69    3.80
   0  -8   3  117.89    4.20
  -1   8  -3  143.29    4.80
  -1   8  -3  170.78    5.20
  -1   8  -3  158.68    5.00
   1  -8   3  172.38    5.20
  -2   8  -3 3172.58   77.59
  -2   8  -3 3148.19   72.69
  -2   8  -3 3131.49   72.79
   2  -8   3 3100.09   72.79
   2  -8   3 3240.78   72.79
  -3   8  -3  164.28    5.40
  -3   8  -3  154.38    5.20
   3  -8   3  165.28    5.20
   3  -8   3  155.58    5.00
   3  -8   3  165.08    5.30
  -4   8  -3   32.00    2.50
  -4   8  -3   33.70    2.80
  -4   8  -3   26.80    2.30
   4  -8   3   32.60    2.50
   4  -8   3   28.00    2.20
   4  -8   3   32.60    2.50
  -5   8  -3  164.88    5.50
  -5   8  -3  162.78    5.50
  -5   8  -3  152.38    5.60
   5  -8   3  160.28    5.60
   5  -8   3  160.48    5.40
   5  -8   3  163.18    5.50
  -6   8  -3  113.69    4.60
  -6   8  -3   99.49    4.80
  -6   8  -3  115.89    4.60
   6  -8   3  103.39    4.80
   6  -8   3  107.39    4.20
   6  -8   3  104.99    4.60
  -7   8  -3    8.20    2.30
  -7   8  -3   11.10    2.10
   7  -8   3    9.00    2.30
  -8   8  -3  530.95   14.20
   8  -8   3  514.65   15.40
  -9   8  -3    1.50    2.50
   9  -8   3   -0.20    2.60
 -10   8  -3   36.00    3.60
  10  -8   3   25.70    3.70
  10   7  -3    6.10    3.50
  10   7  -3   10.30    2.50
 -10  -7   3    9.30    2.00
   9   7  -3    3.00    2.10
   9   7  -3    0.40    2.00
   9   7  -3    2.70    3.00
  -9  -7   3    4.90    1.80
   8   7  -3   70.49    4.20
   8   7  -3   66.79    5.70
   8   7  -3   63.89    4.00
  -8  -7   3   74.99    3.60
  -8  -7   3   68.89    3.30
   7   7  -3   70.29    3.80
   7   7  -3   66.79    5.20
   7   7  -3   71.79    4.00
  -7  -7   3   71.09    3.10
   6   7  -3  775.32   19.00
   6   7  -3  762.62   20.90
   6   7  -3  741.33   20.10
  -6  -7   3  763.82   18.40
  -6  -7   3  787.02   18.50
   5   7  -3  450.65   11.90
   5   7  -3  449.56   12.20
  -5  -7   3  475.45   11.50
  -5  -7   3  456.25   11.50
  -5  -7   3  462.35   12.00
   4   7  -3    2.60    0.90
   4   7  -3    2.30    0.90
   4   7  -3    2.30    1.20
  -4  -7   3    3.30    1.30
  -4  -7   3    1.70    1.00
  -4  -7   3    2.60    1.30
   3   7  -3  331.17    9.10
   3   7  -3  350.16    8.70
  -3  -7   3  362.86    9.00
  -3  -7   3  337.97    8.90
  -3  -7   3  360.26    9.30
   2   7  -3 3465.65   78.29
   2   7  -3 3286.77   78.29
  -2  -7   3 3383.76   78.29
  -2  -7   3 3667.83   78.39
  -2  -7   3 3272.77   78.39
   1   7  -3  332.97    8.60
   1   7  -3  324.57    8.40
  -1  -7   3  314.77    8.50
  -1  -7   3  328.57    8.60
  -1  -7   3  343.27    8.60
   0   7  -3   92.69    3.50
   0  -7   3   95.09    3.50
   0  -7   3   97.59    3.10
  -1   7  -3  690.53   17.40
  -1   7  -3  682.43   16.60
  -1   7  -3  693.03   16.60
   1  -7   3  672.13   16.60
  -2   7  -3   27.90    2.30
  -2   7  -3   25.60    1.90
  -2   7  -3   23.20    1.90
   2  -7   3   28.90    2.00
   2  -7   3   23.50    2.10
   2  -7   3   19.60    1.80
  -3   7  -3 1302.77   31.10
  -3   7  -3 1326.27   31.20
  -3   7  -3 1322.17   31.10
   3  -7   3 1330.97   32.80
   3  -7   3 1316.27   31.10
   3  -7   3 1318.87   31.00
  -4   7  -3  114.59    4.20
  -4   7  -3  113.09    4.30
  -4   7  -3  116.19    4.30
   4  -7   3  108.29    4.00
   4  -7   3  117.79    4.30
   4  -7   3  104.49    4.10
  -5   7  -3  159.18    5.40
  -5   7  -3  150.58    5.40
  -5   7  -3  159.38    5.20
   5  -7   3  154.88    5.10
   5  -7   3  153.78    5.00
   5  -7   3  157.18    5.60
  -6   7  -3   14.00    1.80
  -6   7  -3   12.40    2.00
  -6   7  -3   17.50    2.00
   6  -7   3   16.00    2.00
   6  -7   3   15.30    1.80
   6  -7   3   19.90    2.30
  -7   7  -3  311.47    9.30
  -7   7  -3  335.57    9.90
  -7   7  -3  321.07    9.10
   7  -7   3  314.17   10.30
   7  -7   3  321.07    8.60
  -8   7  -3    0.10    2.20
   8  -7   3    2.00    2.40
  -9   7  -3   19.60    2.80
   9  -7   3   23.80    3.60
 -10   7  -3   -0.80    2.60
  10  -7   3    3.10    3.00
 -11   7  -3    1.50    2.90
  11  -7   3    1.80    3.40
  10   6  -3   29.80    3.10
  10   6  -3   31.30    4.30
  10   6  -3   27.20    3.30
   9   6  -3   51.19    4.60
   9   6  -3   48.00    4.30
   9   6  -3   43.90    3.90
  -9  -6   3   45.70    3.30
   8   6  -3   57.19    4.60
   8   6  -3   53.29    3.80
   8   6  -3   54.09    4.00
  -8  -6   3   61.09    3.10
  -8  -6   3   59.39    2.80
   7   6  -3   74.89    3.90
   7   6  -3   74.89    4.00
   7   6  -3   74.19    5.10
  -7  -6   3   78.89    3.20
  -7  -6   3   75.89    3.00
   6   6  -3   42.60    2.90
   6   6  -3   45.00    3.00
   6   6  -3   37.30    3.30
  -6  -6   3   45.20    2.20
  -6  -6   3   39.70    2.40
   5   6  -3   12.90    1.60
   5   6  -3   12.30    1.50
  -5  -6   3   12.60    1.40
  -5  -6   3   11.70    1.70
  -5  -6   3   14.60    1.30
   4   6  -3  399.26   10.70
   4   6  -3  409.06   11.10
   4   6  -3  434.46   10.10
  -4  -6   3  425.36   10.80
  -4  -6   3  409.16   10.30
  -4  -6   3  432.66   10.30
   3   6  -3 2808.62   71.69
   3   6  -3 2902.41   65.19
   3   6  -3 2757.72   65.49
  -3  -6   3 2978.40   65.39
  -3  -6   3 2792.62   65.29
   2   6  -3   66.99    2.40
   2   6  -3   75.79    2.90
   2   6  -3   75.99    2.60
  -2  -6   3   77.19    2.80
  -2  -6   3   77.19    2.30
  -2  -6   3   76.69    2.90
   1   6  -3  149.99    4.10
   1   6  -3  148.59    4.40
   1   6  -3  150.28    4.30
  -1  -6   3  144.09    4.40
  -1  -6   3  154.08    4.40
  -1  -6   3  142.39    4.20
   0   6  -3   36.20    2.20
   0   6  -3   40.50    2.30
   0  -6   3   41.30    1.90
   0  -6   3   36.50    2.30
  -1   6  -3   25.00    1.70
  -1   6  -3   23.30    2.00
  -1   6  -3   22.30    2.00
   1  -6   3   24.70    2.10
   1  -6   3   23.70    1.70
   1  -6   3   23.00    1.90
  -2   6  -3  289.37    7.60
  -2   6  -3  283.77    7.60
  -2   6  -3  281.17    7.70
  -2   6  -3  296.17    7.90
   2  -6   3  293.97    7.60
   2  -6   3  297.07    7.70
   2  -6   3  286.27    7.90
  -3   6  -3 3483.25   88.49
  -3   6  -3 3693.93   83.19
  -3   6  -3 3616.04   83.19
   3  -6   3 3607.74   83.09
   3  -6   3 3698.53   89.59
   3  -6   3 3651.73   83.09
  -4   6  -3  431.86   11.60
  -4   6  -3  432.36   10.90
  -4   6  -3  445.96   10.80
   4  -6   3  416.26   10.70
   4  -6   3  397.86   11.60
   4  -6   3  410.36   10.80
  -5   6  -3   54.59    3.10
  -5   6  -3   52.29    3.00
  -5   6  -3   49.80    3.20
   5  -6   3   52.99    2.80
   5  -6   3   49.70    3.30
   5  -6   3   56.29    2.90
  -6   6  -3   17.00    2.00
  -6   6  -3   22.70    2.20
  -6   6  -3   17.70    1.90
   6  -6   3   18.60    1.80
   6  -6   3   18.90    2.40
   6  -6   3   20.80    2.00
  -7   6  -3  579.24   14.80
  -7   6  -3  586.44   15.00
   7  -6   3  601.34   14.40
   7  -6   3  587.44   15.00
   7  -6   3  567.34   16.70
  -8   6  -3   86.19    4.80
   8  -6   3  102.29    5.90
  -9   6  -3   -1.70    2.20
   9  -6   3    0.00    2.60
 -10   6  -3   30.20    3.20
  10  -6   3   30.50    4.20
 -11   6  -3    1.70    2.70
  11  -6   3   -0.20    3.20
  11   5  -3    2.40    2.80
  11   5  -3    0.00    3.30
  10   5  -3   44.50    3.90
  10   5  -3   50.79    4.20
  10   5  -3   51.09    4.60
   9   5  -3   51.29    4.00
   9   5  -3   40.20    4.10
   9   5  -3   40.20    3.50
   8   5  -3   35.30    3.50
   8   5  -3   39.50    3.90
   8   5  -3   38.30    3.60
  -8  -5   3   44.60    2.40
   7   5  -3  665.53   16.90
   7   5  -3  666.23   18.30
   7   5  -3  673.13   18.60
  -7  -5   3  675.03   15.90
  -7  -5   3  671.53   16.00
   6   5  -3    1.90    1.90
   6   5  -3    2.10    1.40
   6   5  -3    4.00    1.50
  -6  -5   3    2.20    0.90
  -6  -5   3    2.20    0.90
   5   5  -3  485.85   13.30
   5   5  -3  497.35   12.60
  -5  -5   3  493.65   11.90
  -5  -5   3  496.55   11.80
   4   5  -3 2828.72   66.79
   4   5  -3 2862.41   72.59
  -4  -5   3 2944.71   66.39
  -4  -5   3 2888.31   66.39
  -4  -5   3 2995.10   66.99
   3   5  -3   31.70    2.20
   3   5  -3   33.90    1.50
   3   5  -3   34.30    1.70
  -3  -5   3   36.40    1.90
  -3  -5   3   31.10    1.70
   2   5  -3   14.70    1.30
   2   5  -3   14.60    1.10
   2   5  -3   15.10    1.20
  -2  -5   3   12.00    1.10
  -2  -5   3   12.30    1.10
  -2  -5   3   15.20    1.30
  -2  -5   3    9.90    1.10
   1   5  -3    8.30    1.00
  -1  -5   3    8.60    0.90
  -1  -5   3    9.30    1.10
  -1  -5   3    6.60    1.10
   0   5  -3  414.96   11.00
   0   5  -3  420.06   10.40
   0   5  -3  433.26   10.40
   0  -5   3  418.46   10.40
   0  -5   3  429.76   11.10
  -1   5  -3  248.38    6.70
  -1   5  -3  253.17    6.50
  -1   5  -3  239.58    6.40
  -1   5  -3  242.18    6.50
   1  -5   3  240.08    6.70
   1  -5   3  251.17    6.50
  -2   5  -3 2370.06   53.79
  -2   5  -3 2341.37   57.19
  -2   5  -3 2316.17   53.69
  -2   5  -3 2346.17   53.79
   2  -5   3 2322.77   57.09
   2  -5   3 2345.07   53.69
   2  -5   3 2318.47   53.79
  -3   5  -3   14.70    1.50
  -3   5  -3   12.80    1.30
  -3   5  -3   11.70    1.30
   3  -5   3   12.60    1.30
   3  -5   3   12.80    1.30
   3  -5   3   14.80    1.50
  -4   5  -3  104.59    4.00
  -4   5  -3  115.49    4.20
  -4   5  -3  122.09    4.00
   4  -5   3  100.29    3.80
   4  -5   3  108.09    3.80
   4  -5   3  122.19    4.50
  -5   5  -3   40.70    2.80
  -5   5  -3   44.60    2.60
  -5   5  -3   45.60    2.90
   5  -5   3   47.10    3.40
   5  -5   3   42.10    2.50
   5  -5   3   39.00    2.50
  -6   5  -3  351.36    9.70
  -6   5  -3  375.66    9.70
  -6   5  -3  376.16   10.70
   6  -5   3  359.96    9.70
   6  -5   3  347.07   11.00
   6  -5   3  380.06    9.40
  -7   5  -3    0.40    1.70
  -7   5  -3   -0.10    1.30
   7  -5   3    2.00    2.10
   7  -5   3    1.90    1.50
  -8   5  -3   -2.70    1.80
   8  -5   3   -1.40    1.50
   8  -5   3   -1.80    2.30
  -9   5  -3    0.90    2.10
   9  -5   3    5.50    2.80
 -10   5  -3    5.40    2.50
  10  -5   3   12.80    3.50
 -11   5  -3   -0.20    2.60
  11  -5   3    0.90    3.30
  11   4  -3   31.10    3.80
  11   4  -3   28.60    4.30
  11   4  -3   27.10    3.40
  10   4  -3   24.40    3.30
  10   4  -3   21.60    2.80
  10   4  -3   17.20    3.50
   9   4  -3    3.10    2.10
   9   4  -3    5.50    2.90
   9   4  -3    3.50    2.40
   8   4  -3  547.95   15.80
   8   4  -3  539.45   14.30
   8   4  -3  535.25   15.60
   7   4  -3    4.50    1.80
   7   4  -3    1.90    2.10
   7   4  -3    2.30    1.80
   6   4  -3 1038.10   27.10
   6   4  -3 1055.59   27.30
   6   4  -3 1044.80   25.20
   5   4  -3  422.96   11.70
   5   4  -3  415.86   10.90
  -5  -4   3  422.66   10.10
  -5  -4   3  429.66   10.10
   4   4  -3    0.30    1.10
   3   4  -3  246.18    6.50
   3   4  -3  242.08    5.80
   3   4  -3  233.68    6.70
  -3  -4   3  241.88    6.00
  -3  -4   3  240.28    6.00
  -3  -4   3  246.18    6.50
   2   4  -3  377.76    9.90
   2   4  -3  374.06    9.50
   2   4  -3  391.46    9.10
  -2  -4   3  389.36    9.20
  -2  -4   3  379.36    9.20
  -2  -4   3  381.46    9.50
  -2  -4   3  375.36    9.90
   1   4  -3  419.86   10.00
   1   4  -3  407.06   10.90
   1   4  -3  404.86   10.20
  -1  -4   3  419.56   10.00
  -1  -4   3  420.96   10.20
  -1  -4   3  424.06   10.80
  -1  -4   3  421.86   10.10
   0   4  -3 4091.59  105.19
   0   4  -3 4338.47   98.09
   0   4  -3 4286.77   98.29
   0   4  -3 4111.79  107.59
   0  -4   3 4373.36  107.79
   0  -4   3 4333.67   97.89
   0  -4   3 4393.16   98.79
  -1   4  -3 1499.35   35.00
  -1   4  -3 1562.54   35.00
  -1   4  -3 1489.95   34.90
  -1   4  -3 1503.75   37.10
   1  -4   3 1486.95   38.20
   1  -4   3 1486.55   34.90
   1  -4   3 1503.25   37.10
   1  -4   3 1592.64   35.00
   1  -4   3 1506.75   35.00
  -2   4  -3  138.29    4.00
  -2   4  -3  138.99    3.90
  -2   4  -3  131.09    4.40
  -2   4  -3  142.09    4.10
   2  -4   3  131.19    4.30
   2  -4   3  137.29    3.90
   2  -4   3  139.19    4.00
  -3   4  -3  237.78    7.10
  -3   4  -3  251.17    6.50
  -3   4  -3  254.97    6.60
   3  -4   3  251.97    6.50
   3  -4   3  250.87    6.40
   3  -4   3  234.18    7.20
  -4   4  -3  284.07    7.30
  -4   4  -3  280.47    8.10
  -4   4  -3  262.57    7.30
   4  -4   3  278.97    7.20
   4  -4   3  275.67    7.20
   4  -4   3  275.27    8.30
  -5   4  -3  542.75   13.40
  -5   4  -3  515.95   13.30
  -5   4  -3  574.94   14.70
   5  -4   3  542.55   13.30
   5  -4   3  538.65   13.20
   5  -4   3  536.05   14.90
  -6   4  -3    8.60    1.40
  -6   4  -3   12.70    2.00
  -6   4  -3    8.90    1.60
   6  -4   3   12.70    1.50
   6  -4   3   10.00    2.00
   6  -4   3   12.20    1.50
  -7   4  -3   97.69    3.80
  -7   4  -3   97.09    4.20
   7  -4   3   97.89    3.90
   7  -4   3  107.49    5.40
  -8   4  -3    5.70    1.90
   8  -4   3    4.50    1.60
   8  -4   3    5.80    2.50
  -9   4  -3   14.70    2.30
   9  -4   3    9.50    2.90
 -10   4  -3    9.90    2.50
  10  -4   3    9.50    3.30
 -11   4  -3    3.10    2.60
  11  -4   3   14.20    3.80
  11   3  -3   19.90    3.00
  11   3  -3   26.50    3.90
  11   3  -3   22.70    3.70
  10   3  -3    0.70    2.60
  10   3  -3   -2.50    2.10
  10   3  -3    2.00    2.70
   9   3  -3  564.34   15.30
   9   3  -3  591.34   17.00
   9   3  -3  580.84   16.90
   8   3  -3    4.40    2.10
   8   3  -3    8.00    2.40
   7   3  -3  850.81   20.90
   7   3  -3  835.22   22.40
   6   3  -3   91.89    4.70
   6   3  -3  108.19    4.20
   5   3  -3  400.26   10.40
   5   3  -3  398.46   11.20
   4   3  -3  443.96   11.20
   4   3  -3  440.76   12.00
   3   3  -3 1597.64   37.20
   3   3  -3 1550.44   40.30
  -3  -3   3 1656.63   37.20
  -3  -3   3 1616.04   36.60
  -3  -3   3 1594.34   36.60
   2   3  -3 2101.99   49.50
   2   3  -3 2166.28   49.30
   2   3  -3 2138.19   53.99
  -2  -3   3 2143.19   49.50
  -2  -3   3 2206.08   49.30
  -2  -3   3 2185.98   49.20
  -2  -3   3 2141.29   54.19
   1   3  -3  411.06   11.00
   1   3  -3  428.96   10.00
   1   3  -3  413.36   10.20
  -1  -3   3  427.86   10.90
  -1  -3   3  420.16   10.10
  -1  -3   3  427.36   10.00
  -1  -3   3  420.86   10.00
   0   3  -3  126.49    3.60
   0   3  -3  125.49    3.70
   0   3  -3  131.59    3.50
   0   3  -3  132.49    3.80
   0  -3   3  129.09    3.90
   0  -3   3  125.69    3.70
   0  -3   3  132.29    3.60
   0  -3   3  136.19    3.60
   0  -3   3  129.89    3.50
  -1   3  -3  451.25   11.00
  -1   3  -3  438.96   10.90
  -1   3  -3  444.36   11.70
   1  -3   3  482.75   11.00
   1  -3   3  433.96   10.90
   1  -3   3  497.05   11.00
   1  -3   3  456.35   11.80
   1  -3   3  439.76   12.00
  -2   3  -3  131.19    3.80
  -2   3  -3  124.29    4.30
  -2   3  -3  136.39    3.90
  -2   3  -3  134.19    3.70
   2  -3   3  134.79    3.70
   2  -3   3  132.99    3.80
  -3   3  -3  252.07    6.60
  -3   3  -3  260.77    6.60
   3  -3   3  254.37    6.40
   3  -3   3  247.88    7.50
   3  -3   3  257.77    6.60
  -4   3  -3 1112.69   25.70
  -4   3  -3 1114.29   27.70
  -4   3  -3 1050.49   25.60
   4  -3   3 1083.89   25.50
   4  -3   3 1097.59   25.50
   4  -3   3 1101.69   27.80
  -5   3  -3  393.46   10.90
  -5   3  -3  368.46    9.70
  -5   3  -3  380.56    9.70
   5  -3   3  382.76   11.00
   5  -3   3  384.16    9.50
   5  -3   3  382.26    9.60
  -6   3  -3   58.89    3.70
  -6   3  -3   59.39    3.00
  -6   3  -3   53.99    2.70
   6  -3   3   54.19    2.60
   6  -3   3   59.29    3.90
   6  -3   3   64.19    2.70
  -7   3  -3   46.50    2.70
  -7   3  -3   42.80    3.20
   7  -3   3   44.30    4.10
   7  -3   3   52.59    2.80
  -8   3  -3    5.50    1.90
   8  -3   3    5.30    2.40
   8  -3   3    7.30    1.60
  -9   3  -3    8.40    2.10
   9  -3   3   10.20    2.80
 -10   3  -3    7.10    2.40
  10  -3   3    7.00    3.00
 -11   3  -3  115.59    5.90
  11  -3   3  119.09    7.90
  11   2  -3    2.20    3.00
  11   2  -3    0.90    2.90
  11   2  -3    3.20    2.40
  10   2  -3  321.47   10.00
  10   2  -3  323.87   11.30
  10   2  -3  322.27   11.30
   9   2  -3   21.10    3.10
   9   2  -3   18.60    2.80
   8   2  -3  819.22   22.10
   8   2  -3  823.52   20.70
   7   2  -3   89.19    4.60
   7   2  -3   88.19    4.30
   6   2  -3   21.30    2.10
   6   2  -3   14.70    2.00
   5   2  -3  161.88    5.50
   5   2  -3  163.48    5.30
   4   2  -3   34.40    2.50
   4   2  -3   32.40    2.30
   3   2  -3  143.99    4.60
   3   2  -3  152.78    4.50
   2   2  -3 4389.36  114.69
   2   2  -3 4552.04  105.99
  -2  -2   3 4782.82  105.99
  -2  -2   3 4584.04  104.19
  -2  -2   3 4507.55  104.19
  -2  -2   3 4521.85  114.99
   1   2  -3  334.97    7.80
   1   2  -3  330.77    8.10
   1   2  -3  329.77    8.70
  -1  -2   3  337.37    7.90
  -1  -2   3  325.27    7.90
  -1  -2   3  326.37    8.70
   0   2  -3    4.20    0.70
   0   2  -3    6.50    0.70
   0   2  -3    6.20    0.60
   0   2  -3    5.40    0.60
   0  -2   3    7.20    0.70
   0  -2   3    6.30    0.60
   0  -2   3    7.50    0.80
   0  -2   3    5.10    0.80
   0  -2   3    6.90    0.70
  -1   2  -3 2370.66   60.39
  -1   2  -3 2416.66   56.79
  -1   2  -3 2331.47   61.69
  -1   2  -3 2382.96   55.99
  -1   2  -3 2495.25   55.79
   1  -2   3 2449.55   55.99
   1  -2   3 2460.45   55.59
   1  -2   3 2502.35   56.19
  -2   2  -3  126.99    3.60
  -2   2  -3  122.19    4.10
  -2   2  -3  123.99    3.60
   2  -2   3  120.59    3.30
   2  -2   3  122.59    4.20
   2  -2   3  128.09    3.60
   2  -2   3  127.79    4.10
  -3   2  -3  433.06   10.50
  -3   2  -3  432.76   10.50
   3  -2   3  431.46   10.20
   3  -2   3  429.06   10.40
   3  -2   3  425.66   11.60
  -4   2  -3  122.69    4.60
  -4   2  -3  116.29    3.80
  -4   2  -3  118.99    3.70
   4  -2   3  119.89    3.70
   4  -2   3  123.19    4.60
   4  -2   3  122.59    3.50
  -5   2  -3  252.77    6.80
  -5   2  -3  263.77    8.00
  -5   2  -3  254.57    7.00
   5  -2   3  262.77    8.10
   5  -2   3  250.97    6.60
  -6   2  -3    3.80    1.10
  -6   2  -3    2.30    1.30
  -6   2  -3    2.40    1.70
   6  -2   3    2.20    1.10
   6  -2   3    3.20    1.70
  -7   2  -3    4.90    1.60
  -7   2  -3    5.70    1.30
   7  -2   3    3.20    2.10
  -8   2  -3    3.90    1.70
   8  -2   3    6.50    2.40
   8  -2   3    4.50    1.40
  -9   2  -3    5.30    1.90
   9  -2   3    2.60    1.80
   9  -2   3    4.70    2.60
 -10   2  -3  285.47    8.60
  10  -2   3  271.57   10.90
 -11   2  -3   10.60    2.70
  11  -2   3   10.50    3.50
  11   1  -3   75.79    6.20
  11   1  -3   80.19    5.40
  11   1  -3   84.39    6.60
  10   1  -3    0.80    2.60
  10   1  -3   -4.90    2.40
  10   1  -3    4.10    2.60
   9   1  -3  368.96   10.90
   9   1  -3  356.56   11.50
   8   1  -3   69.29    4.60
   8   1  -3   63.69    4.40
   7   1  -3   20.10    2.30
   7   1  -3   15.10    2.10
   6   1  -3    3.20    1.50
   5   1  -3  165.18    5.40
   4   1  -3  169.68    5.50
   3   1  -3   47.90    2.40
   2   1  -3   20.90    1.80
   2   1  -3   21.80    0.90
  -2  -1   3   21.60    1.00
  -2  -1   3   23.50    1.80
  -2  -1   3   22.70    1.10
   1   1  -3   -0.80    0.50
   1   1  -3   -0.90    0.80
   1   1  -3   -2.10    0.70
   1   1  -3   -0.20    0.60
  -1  -1   3    0.60    0.70
  -1  -1   3   -1.70    0.70
  -1  -1   3    0.00    0.60
   0   1  -3    7.20    0.90
   0   1  -3   10.40    1.00
   0   1  -3    9.50    1.00
   0   1  -3    9.50    1.00
   0   1  -3    9.80    0.90
   0  -1   3    9.20    0.90
   0  -1   3    9.90    1.00
   0  -1   3    9.20    1.00
   0  -1   3   10.90    1.00
  -1   1  -3 1211.18   27.60
  -1   1  -3 1229.28   27.60
  -1   1  -3 1184.68   27.30
  -1   1  -3 1168.28   30.20
   1  -1   3 1154.28   27.20
   1  -1   3 1189.68   30.20
   1  -1   3 1141.99   29.50
   1  -1   3 1204.88   27.60
   1  -1   3 1257.17   27.70
  -2   1  -3   42.90    2.20
  -2   1  -3   42.80    2.00
  -2   1  -3   46.30    1.90
   2  -1   3   43.00    1.40
   2  -1   3   45.70    2.30
   2  -1   3   48.60    2.40
   2  -1   3   39.20    1.90
  -3   1  -3 1393.66   31.70
  -3   1  -3 1362.66   31.70
   3  -1   3 1330.57   31.50
   3  -1   3 1357.76   34.00
   3  -1   3 1373.66   31.20
  -4   1  -3  540.15   13.00
  -4   1  -3  535.05   13.10
  -4   1  -3  545.65   14.40
   4  -1   3  534.85   12.90
   4  -1   3  525.45   14.40
  -5   1  -3  158.68    4.90
  -5   1  -3  162.78    5.90
  -5   1  -3  166.08    4.80
   5  -1   3  164.58    5.90
   5  -1   3  165.58    4.60
  -6   1  -3   66.69    2.90
  -6   1  -3   65.49    3.20
   6  -1   3   63.29    4.10
  -7   1  -3   33.80    2.50
  -7   1  -3   29.70    2.20
   7  -1   3   33.30    3.20
  -8   1  -3    6.40    1.80
   8  -1   3    4.40    1.60
   8  -1   3    6.60    2.50
  -9   1  -3  371.76   10.10
   9  -1   3  350.26    9.80
   9  -1   3  363.86   12.30
 -10   1  -3    5.00    2.20
  10  -1   3    0.80    2.90
  11   0  -3    0.40    3.00
  11   0  -3   -4.70    2.50
  11   0  -3    0.50    2.60
  10   0  -3  157.18    7.00
  10   0  -3  171.18    7.80
  10   0  -3  165.28    7.30
   9   0  -3   13.70    2.60
   9   0  -3   15.40    2.80
   8   0  -3   62.39    4.30
   7   0  -3   29.60    2.50
   6   0  -3    7.80    1.60
   5   0  -3  257.47    7.40
   4   0  -3   45.70    2.80
   3   0  -3  154.88    5.00
  -3   0   3  160.38    4.00
  -3   0   3  158.58    3.90
   2   0  -3   44.50    1.60
   2   0  -3   42.90    2.40
   2   0  -3   45.80    1.50
  -2   0   3   42.10    2.30
  -2   0   3   43.40    1.70
  -2   0   3   44.20    1.60
   1   0  -3  422.06   10.20
   1   0  -3  392.16   10.70
   1   0  -3  392.76    9.80
  -1   0   3  398.86   10.20
  -1   0   3  411.96    9.80
  -1   0   3  414.36    9.80
   0   0  -3  707.23   16.70
   0   0  -3  724.73   16.70
   0   0  -3  709.93   18.40
   0   0  -3  691.03   17.70
   0   0   3  704.93   16.70
   0   0   3  704.23   17.70
   0   0   3  716.93   18.30
   0   0   3  731.73   16.80
  -1   0  -3  443.06   11.70
  -1   0  -3  433.76   10.80
  -1   0  -3  450.35   11.50
  -1   0  -3  470.05   10.80
   1   0   3  439.36   11.40
   1   0   3  427.16   10.70
   1   0   3  443.36   10.80
   1   0   3  436.66   11.60
  -2   0  -3 1881.71   41.40
  -2   0  -3 1735.73   41.40
   2   0   3 1799.62   41.30
   2   0   3 1798.22   45.20
   2   0   3 1753.62   44.10
  -3   0  -3   10.60    1.10
  -3   0  -3    6.80    1.10
   3   0   3    9.80    1.00
   3   0   3    7.80    1.40
   3   0   3    8.70    1.20
  -4   0  -3 1077.29   24.90
  -4   0  -3 1002.40   24.90
  -4   0  -3 1101.99   27.00
   4   0   3 1062.29   24.60
   4   0   3  995.60   26.80
   4   0   3 1089.59   24.40
  -5   0  -3    1.30    1.20
  -5   0  -3    2.40    1.60
  -5   0  -3    2.60    1.00
   5   0   3    1.50    0.80
   5   0   3    2.50    1.00
   5   0   3    1.40    1.50
  -6   0  -3   20.30    1.70
  -6   0  -3   17.80    1.80
   6   0   3   19.00    1.50
   6   0   3   16.60    2.30
  -7   0  -3   51.49    3.30
  -7   0  -3   45.90    2.90
   7   0   3   40.80    2.60
   7   0   3   48.50    4.40
  -8   0  -3  401.06   10.70
   8   0   3  392.56   12.70
   8   0   3  394.06   10.20
  -9   0  -3    2.90    2.00
   9   0   3   -3.60    1.50
   9   0   3    1.40    2.70
 -10   0  -3  313.57    9.30
  10   0   3  306.27   11.80
  11  -1  -3  101.39    6.30
  11  -1  -3   97.29    7.10
  11  -1  -3   92.79    6.10
  10  -1  -3   58.39    4.90
   9  -1  -3  160.48    6.70
   8  -1  -3   71.79    4.40
   7  -1  -3    2.40    1.60
   6  -1  -3    2.80    1.30
  -6   1   3    0.90    0.80
  -6   1   3    2.10    0.80
   5  -1  -3  119.29    4.20
  -5   1   3  131.39    3.40
  -5   1   3  118.89    3.40
   4  -1  -3  283.07    7.60
   4  -1  -3  287.97    8.40
  -4   1   3  285.97    6.90
  -4   1   3  276.37    6.90
   3  -1  -3   96.19    2.70
   3  -1  -3  100.39    3.70
  -3   1   3   96.39    2.80
   2  -1  -3  199.08    6.00
   2  -1  -3  215.18    5.20
  -2   1   3  198.98    5.20
  -2   1   3  202.68    5.20
   1  -1  -3 1990.30   45.40
   1  -1  -3 2072.79   45.50
   1  -1  -3 1923.61   48.60
   1  -1  -3 1892.81   49.60
  -1   1   3 1991.60   45.50
  -1   1   3 2002.00   49.70
  -1   1   3 2042.60   48.60
  -1   1   3 1940.21   45.70
   0  -1  -3   85.49    2.80
   0  -1  -3   84.49    2.80
   0  -1  -3   77.79    3.20
   0  -1  -3   83.09    2.80
   0   1   3   85.29    3.10
   0   1   3   82.29    2.70
   0   1   3   83.79    2.70
  -1  -1  -3  514.45   13.20
  -1  -1  -3  508.05   12.20
  -1  -1  -3  521.95   12.30
  -1  -1  -3  506.85   13.00
   1   1   3  502.95   13.30
   1   1   3  491.55   12.90
   1   1   3  494.15   12.20
  -2  -1  -3  101.59    3.40
  -2  -1  -3  101.49    3.70
  -2  -1  -3  105.59    3.40
   2   1   3   95.59    3.20
   2   1   3  105.09    3.40
   2   1   3   94.79    3.60
  -3  -1  -3 2165.78   48.60
  -3  -1  -3 2111.49   48.60
   3   1   3 2104.49   52.89
   3   1   3 2008.50   51.79
   3   1   3 2113.89   48.40
  -4  -1  -3    2.60    1.50
  -4  -1  -3    2.90    1.10
  -4  -1  -3    3.10    1.30
   4   1   3    4.90    1.50
   4   1   3    3.00    1.00
   4   1   3    5.90    1.20
  -5  -1  -3   34.20    2.30
  -5  -1  -3   37.90    2.70
  -5  -1  -3   41.10    3.30
   5   1   3   33.10    1.70
   5   1   3   25.10    2.40
   5   1   3   32.20    2.80
   5   1   3   36.20    2.00
  -6  -1  -3  224.18    6.90
  -6  -1  -3  241.38    6.90
   6   1   3  228.58    8.00
   6   1   3  245.98    7.80
   6   1   3  235.68    6.20
  -7  -1  -3  671.83   16.50
  -7  -1  -3  635.44   16.40
   7   1   3  652.83   15.70
   7   1   3  663.63   18.50
  -8  -1  -3   -1.60    1.70
   8   1   3   -3.70    1.30
   8   1   3    1.80    2.40
  -9  -1  -3  492.05   13.20
   9   1   3  492.15   15.60
 -10  -1  -3   25.20    3.00
  10   1   3   32.10    4.40
  11  -2  -3   48.10    5.00
  11  -2  -3   54.19    5.30
  10  -2  -3   -0.70    2.20
   9  -2  -3   13.90    2.50
  -9   2   3   10.80    1.50
  -9   2   3   11.60    1.40
   8  -2  -3    3.80    1.90
  -8   2   3    0.60    1.30
  -8   2   3    1.30    1.20
   7  -2  -3   19.50    2.10
  -7   2   3   14.50    1.30
  -7   2   3   13.90    1.40
   6  -2  -3  233.38    6.90
  -6   2   3  222.58    5.90
  -6   2   3  228.28    5.90
   5  -2  -3  404.76   10.60
  -5   2   3  387.96    9.70
  -5   2   3  400.06    9.70
   4  -2  -3    8.30    1.00
   4  -2  -3    6.90    1.60
   4  -2  -3   10.70    0.90
  -4   2   3    9.70    1.00
  -4   2   3    7.90    0.90
   3  -2  -3   30.70    1.40
   3  -2  -3   29.70    2.40
   3  -2  -3   29.60    1.50
  -3   2   3   31.00    1.70
  -3   2   3   28.30    1.50
   2  -2  -3 1079.79   27.30
   2  -2  -3 1053.29   24.80
  -2   2   3 1085.29   24.90
  -2   2   3 1048.50   24.80
  -2   2   3 1080.29   27.30
   1  -2  -3  593.34   14.00
   1  -2  -3  557.54   13.50
   1  -2  -3  568.14   14.80
  -1   2   3  559.54   13.50
  -1   2   3  556.84   14.00
  -1   2   3  573.64   14.80
   0  -2  -3   18.30    1.90
   0  -2  -3   16.70    1.50
   0  -2  -3   14.90    1.30
   0   2   3   14.50    1.40
   0   2   3   21.50    1.70
   0   2   3   15.80    1.30
   0   2   3   19.00    1.70
  -1  -2  -3  491.25   12.50
  -1  -2  -3  496.95   11.90
  -1  -2  -3  487.45   11.30
  -1  -2  -3  484.35   12.70
  -1  -2  -3  476.15   11.80
   1   2   3  476.85   11.90
   1   2   3  470.25   12.50
   1   2   3  497.75   12.90
  -2  -2  -3 1024.70   24.20
  -2  -2  -3 1031.10   26.10
  -2  -2  -3 1083.09   25.80
  -2  -2  -3 1014.90   24.10
   2   2   3  985.50   25.60
   2   2   3 1004.50   24.10
   2   2   3 1014.60   26.10
  -3  -2  -3    3.60    1.20
  -3  -2  -3    5.10    1.50
  -3  -2  -3    5.10    1.20
   3   2   3    6.80    1.10
   3   2   3    2.40    1.00
   3   2   3    4.40    1.30
  -4  -2  -3  239.18    7.00
  -4  -2  -3  248.18    7.00
   4   2   3  248.68    6.60
   4   2   3  262.47    7.40
   4   2   3  236.28    7.70
  -5  -2  -3  795.82   18.90
  -5  -2  -3  760.22   18.90
   5   2   3  759.82   17.90
   5   2   3  778.22   18.30
   5   2   3  765.32   20.40
   5   2   3  749.62   20.50
  -6  -2  -3  246.48    7.10
  -6  -2  -3  227.38    7.10
   6   2   3  226.38    8.20
   6   2   3  238.48    6.10
   6   2   3  236.78    7.70
  -7  -2  -3   -1.60    1.40
  -7  -2  -3   -0.10    1.70
   7   2   3   -4.20    1.10
   7   2   3   -0.30    2.20
  -8  -2  -3  403.56   11.30
   8   2   3  417.86   10.40
   8   2   3  409.56   13.10
  -9  -2  -3   -1.60    2.00
   9   2   3    1.60    2.90
 -10  -2  -3   -0.80    2.30
  10   2   3    4.50    3.30
  11  -3  -3    0.90    2.50
  11  -3  -3    2.90    3.40
  10  -3  -3    0.70    2.30
 -10   3   3    1.50    1.60
   9  -3  -3  180.18    6.90
  -9   3   3  178.28    5.50
  -9   3   3  175.28    5.40
   8  -3  -3  158.78    6.00
  -8   3   3  149.99    4.90
  -8   3   3  161.48    4.90
   7  -3  -3  298.37    8.60
  -7   3   3  286.97    7.60
  -7   3   3  282.77    7.60
   6  -3  -3  545.75   14.20
  -6   3   3  546.55   13.10
  -6   3   3  522.25   13.10
   5  -3  -3  772.12   17.40
   5  -3  -3  755.42   18.80
  -5   3   3  716.43   17.60
  -5   3   3  733.13   17.60
   4  -3  -3  392.86    9.60
   4  -3  -3  411.46   10.10
   4  -3  -3  384.26   11.30
  -4   3   3  392.26    9.80
  -4   3   3  404.36    9.80
   3  -3  -3  116.09    4.30
   3  -3  -3  118.99    3.40
  -3   3   3  116.49    3.50
  -3   3   3  112.19    3.60
   2  -3  -3  221.98    6.40
   2  -3  -3  209.48    5.70
  -2   3   3  209.88    5.80
  -2   3   3  223.08    5.80
   1  -3  -3 1003.10   26.40
   1  -3  -3 1064.89   25.30
   1  -3  -3 1025.00   24.30
  -1   3   3 1010.80   24.30
  -1   3   3 1062.39   26.50
  -1   3   3 1021.60   25.40
  -1   3   3 1088.69   24.40
   0  -3  -3   37.70    2.10
   0  -3  -3   36.40    1.80
   0  -3  -3   36.70    1.80
   0  -3  -3   34.50    2.00
   0   3   3   33.60    1.80
   0   3   3   38.10    2.00
   0   3   3   33.60    2.00
  -1  -3  -3 1897.11   44.90
  -1  -3  -3 1861.51   41.80
  -1  -3  -3 1787.42   42.30
  -1  -3  -3 1910.51   42.40
  -1  -3  -3 1782.32   46.00
   1   3   3 1799.82   42.30
   1   3   3 1802.02   45.90
   1   3   3 1774.42   44.80
  -2  -3  -3   63.29    3.00
  -2  -3  -3   66.39    2.70
  -2  -3  -3   58.99    2.70
  -2  -3  -3   60.79    2.70
  -2  -3  -3   64.69    2.00
   2   3   3   67.29    2.70
   2   3   3   64.89    2.80
   2   3   3   64.29    1.90
   2   3   3   60.99    3.00
  -3  -3  -3  929.71   23.10
  -3  -3  -3  874.81   21.30
  -3  -3  -3  905.11   21.50
   3   3   3  879.81   22.90
   3   3   3  873.81   21.30
   3   3   3  887.11   23.00
  -4  -3  -3  655.83   16.40
  -4  -3  -3  666.63   16.40
   4   3   3  680.33   17.60
   4   3   3  670.33   17.80
   4   3   3  648.64   16.10
  -5  -3  -3  377.16   10.20
  -5  -3  -3  375.66   10.10
   5   3   3  382.66   10.90
   5   3   3  385.86    9.70
   5   3   3  377.86    9.10
   5   3   3  379.76   11.30
  -6  -3  -3    1.80    1.30
  -6  -3  -3    1.70    1.60
   6   3   3    1.00    1.10
   6   3   3    2.70    1.50
   6   3   3    0.60    2.10
   6   3   3    1.40    0.90
  -7  -3  -3  474.15   12.80
   7   3   3  477.85   14.60
   7   3   3  477.95   11.60
  -8  -3  -3    9.70    2.30
   8   3   3    8.40    3.00
   8   3   3   10.00    1.40
  -9  -3  -3    1.60    2.20
   9   3   3    4.40    3.00
 -10  -3  -3   24.40    3.20
  10   3   3   21.30    4.20
  11  -4  -3   -2.80    3.40
  11  -4  -3    2.70    2.50
 -11   4   3    1.00    1.90
  10  -4  -3   49.10    4.60
  10  -4  -3   48.00    4.90
 -10   4   3   53.69    3.60
   9  -4  -3   90.79    4.90
  -9   4   3   94.39    3.90
  -9   4   3   89.09    4.10
   8  -4  -3  186.48    6.70
  -8   4   3  201.18    5.90
  -8   4   3  192.98    6.00
   7  -4  -3  165.38    5.70
  -7   4   3  170.28    5.10
  -7   4   3  162.88    5.20
   6  -4  -3  705.63   18.00
  -6   4   3  714.33   16.90
  -6   4   3  680.53   16.90
   5  -4  -3  137.89    4.50
   5  -4  -3  150.38    4.30
  -5   4   3  166.38    4.70
  -5   4   3  152.58    4.70
   4  -4  -3  548.25   13.20
   4  -4  -3  535.45   15.20
  -4   4   3  549.65   13.50
  -4   4   3  565.94   13.40
   3  -4  -3  263.97    7.90
   3  -4  -3  264.07    6.80
  -3   4   3  257.67    7.00
  -3   4   3  266.47    6.90
   2  -4  -3  480.05   13.10
   2  -4  -3  486.45   12.00
  -2   4   3  482.25   12.10
  -2   4   3  508.65   12.10
   1  -4  -3  418.36   10.60
   1  -4  -3  423.56   11.40
  -1   4   3  420.86   10.70
  -1   4   3  449.26   11.50
  -1   4   3  423.26   10.70
   0  -4  -3 1663.03   38.90
   0  -4  -3 1663.93   42.20
   0  -4  -3 1725.83   38.70
   0   4   3 1645.64   38.90
   0   4   3 1711.03   42.20
   0   4   3 1634.54   41.00
  -1  -4  -3    7.20    1.10
  -1  -4  -3   10.40    1.00
  -1  -4  -3   10.60    1.30
   1   4   3   10.00    1.30
   1   4   3    9.30    1.10
   1   4   3    4.70    1.20
  -2  -4  -3  487.95   11.90
  -2  -4  -3  471.65   11.20
  -2  -4  -3  456.55   11.80
  -2  -4  -3  456.45   12.50
   2   4   3  478.35   12.60
   2   4   3  470.95   11.10
   2   4   3  457.75   12.60
   2   4   3  476.45   11.90
  -3  -4  -3 1065.19   24.40
  -3  -4  -3 1047.50   25.10
  -3  -4  -3 1083.99   25.30
   3   4   3 1038.50   26.90
   3   4   3 1055.09   24.30
   3   4   3 1035.50   27.10
   3   4   3 1049.40   25.10
  -4  -4  -3  221.08    6.50
  -4  -4  -3  215.78    6.40
   4   4   3  204.18    6.10
   4   4   3  211.18    7.20
   4   4   3  218.78    6.50
  -5  -4  -3    1.30    1.20
  -5  -4  -3    4.10    1.60
   5   4   3    1.30    0.80
   5   4   3    1.10    2.00
   5   4   3    2.80    1.30
   5   4   3    4.10    1.20
  -6  -4  -3  385.26   10.90
  -6  -4  -3  381.56   10.60
   6   4   3  399.66   10.10
   6   4   3  398.06   11.40
   6   4   3  385.26   12.10
  -7  -4  -3   45.90    4.00
   7   4   3   40.10    3.80
   7   4   3   47.80    3.60
  -8  -4  -3   -0.70    2.10
   8   4   3   -0.10    2.70
  -9  -4  -3    4.40    2.40
   9   4   3    1.90    3.20
 -10  -4  -3   10.80    2.90
  10   4   3   11.80    3.90
  11  -5  -3    3.40    3.70
  11  -5  -3    4.40    2.70
 -11   5   3    0.80    2.10
  10  -5  -3    3.40    2.40
  10  -5  -3    4.50    3.50
 -10   5   3    5.50    2.10
   9  -5  -3   81.99    4.80
  -9   5   3   88.49    4.30
   8  -5  -3   90.29    4.60
  -8   5   3  104.89    4.20
  -8   5   3   95.19    4.30
   7  -5  -3  469.35   13.20
  -7   5   3  518.75   12.50
  -7   5   3  484.65   12.50
   6  -5  -3    6.00    1.00
   6  -5  -3    5.40    1.30
  -6   5   3    4.50    1.50
  -6   5   3    5.90    1.40
   5  -5  -3   24.80    2.60
   5  -5  -3   30.10    1.80
   5  -5  -3   31.50    2.00
  -5   5   3   40.70    2.50
  -5   5   3   37.80    2.70
   4  -5  -3 1505.75   38.90
  -4   5   3 1532.35   35.30
  -4   5   3 1481.75   35.20
   3  -5  -3  629.64   16.70
  -3   5   3  591.84   15.10
  -3   5   3  638.14   15.20
   2  -5  -3   35.10    2.50
  -2   5   3   34.20    2.40
   1  -5  -3 2119.09   53.59
  -1   5   3 2077.19   51.79
  -1   5   3 2107.49   49.40
  -1   5   3 2224.18   53.69
   0  -5  -3   85.79    3.00
   0  -5  -3   76.79    3.10
   0  -5  -3   81.09    3.30
   0   5   3   78.99    3.00
   0   5   3   77.69    2.90
   0   5   3   78.89    3.20
  -1  -5  -3  674.23   17.90
  -1  -5  -3  669.93   16.70
  -1  -5  -3  693.23   16.30
   1   5   3  680.93   17.50
   1   5   3  701.53   17.70
   1   5   3  679.13   16.70
  -2  -5  -3  954.10   24.30
  -2  -5  -3  939.41   22.80
  -2  -5  -3  968.40   22.20
   2   5   3  948.61   22.10
   2   5   3  939.01   24.20
   2   5   3  952.60   22.80
   2   5   3  941.21   24.30
  -3  -5  -3  237.08    6.80
  -3  -5  -3  223.58    6.80
  -3  -5  -3  239.18    6.10
   3   5   3  226.78    7.40
   3   5   3  239.78    7.00
   3   5   3  225.88    6.70
   3   5   3  229.78    5.90
  -4  -5  -3    1.30    0.90
  -4  -5  -3    0.10    1.10
  -4  -5  -3    2.20    1.50
   4   5   3    0.80    1.00
   4   5   3    1.60    0.80
   4   5   3   -0.70    1.70
   4   5   3    1.80    1.30
  -5  -5  -3  316.67    9.20
  -5  -5  -3  326.27    9.10
   5   5   3  319.97    9.30
   5   5   3  307.37    8.60
   5   5   3  327.67   10.30
  -6  -5  -3   61.39    4.30
   6   5   3   64.99    5.10
   6   5   3   66.99    3.60
   6   5   3   64.49    2.50
  -7  -5  -3   -0.30    2.00
   7   5   3   -0.70    1.60
   7   5   3   -0.60    2.40
  -8  -5  -3   11.70    2.60
   8   5   3   11.40    3.50
  -9  -5  -3   17.30    2.90
   9   5   3   17.90    3.80
  11  -6  -3   46.70    5.50
 -11   6   3   41.80    3.30
  10  -6  -3   77.59    5.10
  10  -6  -3   85.19    7.40
 -10   6   3   88.09    4.90
   9  -6  -3   46.90    4.60
   9  -6  -3   42.60    3.90
  -9   6   3   47.40    4.00
   8  -6  -3  266.77    8.30
  -8   6   3  265.37    8.00
   7  -6  -3   17.20    1.80
  -7   6   3   13.90    1.90
  -7   6   3   11.90    2.00
   6  -6  -3   96.49    3.50
   6  -6  -3  101.19    3.40
   6  -6  -3   85.59    5.20
  -6   6   3   95.09    4.20
  -6   6   3   98.59    3.90
   5  -6  -3 1484.65   35.90
   5  -6  -3 1535.05   40.10
  -5   6   3 1524.95   36.20
  -5   6   3 1613.44   36.30
   4  -6  -3  338.97   10.30
  -4   6   3  337.57    9.20
  -4   6   3  350.56    9.20
   3  -6  -3   97.09    4.40
   3  -6  -3  100.99    3.80
  -3   6   3   97.99    4.00
  -3   6   3   99.29    4.00
   2  -6  -3  673.83   16.30
   2  -6  -3  656.93   17.50
   2  -6  -3  648.34   16.10
  -2   6   3  645.54   16.20
   1  -6  -3   90.69    3.70
   1  -6  -3   95.49    3.60
   1  -6  -3   97.99    3.60
  -1   6   3   91.69    3.70
  -1   6   3   84.19    3.00
   0  -6  -3  218.38    6.30
   0   6   3  205.98    6.20
   0   6   3  205.18    6.10
   0   6   3  215.28    6.20
  -1  -6  -3  798.62   19.60
  -1  -6  -3  810.52   21.00
   1   6   3  817.62   20.70
   1   6   3  801.92   20.60
   1   6   3  803.12   19.60
  -2  -6  -3   78.39    3.00
  -2  -6  -3   80.49    3.60
  -2  -6  -3   78.19    2.90
   2   6   3   76.19    3.00
   2   6   3   76.59    3.50
   2   6   3   73.89    2.80
   2   6   3   65.69    3.70
  -3  -6  -3    3.80    1.60
  -3  -6  -3    3.40    1.10
   3   6   3    5.90    1.00
   3   6   3    3.30    1.20
   3   6   3    3.10    1.40
   3   6   3    2.20    1.70
  -4  -6  -3  565.74   14.10
  -4  -6  -3  565.64   14.90
  -4  -6  -3  605.94   15.10
   4   6   3  588.74   14.80
   4   6   3  583.34   16.20
   4   6   3  595.54   14.00
   4   6   3  582.34   15.80
  -5  -6  -3  210.48    6.70
  -5  -6  -3  211.68    6.90
   5   6   3  207.38    6.70
   5   6   3  206.78    5.50
   5   6   3  202.78    7.80
   5   6   3  202.88    6.30
  -6  -6  -3    5.90    2.10
   6   6   3    8.20    2.70
   6   6   3    2.70    1.50
  -7  -6  -3    6.90    2.30
   7   6   3   11.50    3.10
  -8  -6  -3   29.60    3.30
   8   6   3   28.50    4.20
  -9  -6  -3    5.70    2.70
   9   6   3    4.50    3.40
  11  -7  -3   63.09    6.20
 -11   7   3   68.99    5.20
  10  -7  -3    0.80    3.50
 -10   7   3   -0.20    2.30
   9  -7  -3  393.26   11.30
   9  -7  -3  377.86   13.50
  -9   7   3  388.16   10.90
   8  -7  -3   55.49    3.40
   8  -7  -3   56.99    5.60
  -8   7   3   62.49    4.30
   7  -7  -3  394.76   13.20
   7  -7  -3  414.16   10.90
  -7   7   3  430.96   11.20
  -7   7   3  407.86   11.20
   6  -7  -3 1066.39   29.10
   6  -7  -3 1085.99   25.70
  -6   7   3 1055.59   26.00
  -6   7   3 1109.19   26.10
   5  -7  -3  223.38    8.30
  -5   7   3  261.67    7.30
  -5   7   3  240.28    7.30
   4  -7  -3  173.38    5.50
   4  -7  -3  177.28    6.50
  -4   7   3  187.08    6.00
  -4   7   3  171.78    5.90
   3  -7  -3 1046.10   27.70
   3  -7  -3 1102.79   25.70
   3  -7  -3 1056.79   25.30
  -3   7   3 1031.10   25.40
   2  -7  -3  294.17    8.80
   2  -7  -3  294.47    8.30
   2  -7  -3  303.17    8.40
  -2   7   3  299.27    8.40
   1  -7  -3  584.04   15.60
   1  -7  -3  616.84   14.80
   1  -7  -3  591.54   14.80
  -1   7   3  573.94   14.80
  -1   7   3  568.24   14.80
   0  -7  -3   28.20    2.30
   0  -7  -3   28.00    2.30
   0   7   3   25.20    2.20
   0   7   3   23.90    2.10
   0   7   3   25.50    2.00
  -1  -7  -3  216.68    6.70
  -1  -7  -3  256.57    7.30
   1   7   3  239.38    7.20
   1   7   3  255.67    6.90
   1   7   3  249.08    7.30
  -2  -7  -3   60.49    3.50
  -2  -7  -3   66.69    2.80
   2   7   3   65.99    2.70
   2   7   3   62.99    3.30
   2   7   3   65.69    3.70
   2   7   3   64.59    2.80
  -3  -7  -3  114.89    4.80
   3   7   3  110.09    4.60
   3   7   3  122.39    3.80
   3   7   3  120.29    4.10
   3   7   3  119.49    5.20
  -4  -7  -3  303.57    9.00
   4   7   3  306.07    7.90
   4   7   3  302.57    8.80
   4   7   3  318.27    8.90
   4   7   3  302.97    9.90
  -5  -7  -3    3.90    1.20
  -5  -7  -3    6.10    2.00
   5   7   3    3.50    1.50
   5   7   3    3.70    2.40
   5   7   3    3.20    1.60
   5   7   3    4.10    1.20
  -6  -7  -3   82.49    5.00
   6   7   3   78.69    5.80
   6   7   3   76.09    4.00
   6   7   3   78.69    3.00
  -7  -7  -3    5.70    2.50
   7   7   3    6.00    3.10
  -8  -7  -3    0.50    2.50
   8   7   3    2.10    3.20
  -9  -7  -3   16.40    3.20
   9   7   3   21.10    4.30
  11  -8  -3   13.30    4.60
 -11   8   3   22.20    3.20
  10  -8  -3  152.38    9.00
 -10   8   3  172.28    6.90
   9  -8  -3   10.70    1.90
   9  -8  -3    5.90    3.50
  -9   8   3   10.30    2.60
   8  -8  -3  157.98    5.10
   8  -8  -3  158.58    8.10
  -8   8   3  151.28    6.20
   7  -8  -3  243.48    9.40
  -7   8   3  243.28    7.90
   6  -8  -3  222.18    8.70
   6  -8  -3  231.28    6.80
  -6   8   3  220.08    7.40
  -6   8   3  242.18    7.30
   5  -8  -3  198.58    7.50
  -5   8   3  196.48    6.70
   4  -8  -3  662.33   18.40
   4  -8  -3  678.43   16.70
  -4   8   3  655.83   16.80
   3  -8  -3  236.28    7.10
   3  -8  -3  215.98    6.90
   3  -8  -3  217.58    7.40
  -3   8   3  223.88    7.00
   2  -8  -3  601.24   14.50
   2  -8  -3  538.55   15.20
   2  -8  -3  558.44   14.30
  -2   8   3  550.44   14.00
  -2   8   3  555.44   14.40
   1  -8  -3   68.69    3.30
   1  -8  -3   64.49    3.80
   1  -8  -3   67.29    3.40
  -1   8   3   67.79    3.70
  -1   8   3   71.29    2.90
   0  -8  -3    4.90    1.40
   0  -8  -3    5.60    1.30
   0   8   3    4.10    1.60
   0   8   3    6.60    1.40
  -1  -8  -3  198.18    6.00
  -1  -8  -3  194.68    6.10
   1   8   3  188.38    6.30
   1   8   3  200.58    5.80
   1   8   3  187.48    6.30
  -2  -8  -3   93.29    3.70
  -2  -8  -3   92.69    3.40
  -2  -8  -3   93.19    4.40
   2   8   3   96.49    3.30
   2   8   3   77.69    3.40
   2   8   3   85.89    4.10
   2   8   3   90.59    4.40
  -3  -8  -3 1001.50   24.50
  -3  -8  -3 1031.50   25.20
   3   8   3 1031.50   24.30
   3   8   3 1040.00   25.20
   3   8   3 1019.80   26.30
   3   8   3 1047.00   26.90
  -4  -8  -3  162.18    6.10
   4   8   3  151.58    6.70
   4   8   3  160.78    5.10
   4   8   3  155.78    5.80
   4   8   3  150.98    4.80
  -5  -8  -3   32.20    3.00
   5   8   3   34.90    2.40
   5   8   3   34.10    3.50
   5   8   3   38.90    2.90
  -6  -8  -3    8.30    2.50
   6   8   3    7.00    3.00
   6   8   3   12.00    1.40
  -7  -8  -3    9.60    2.70
   7   8   3   12.90    3.40
  -8  -8  -3    6.80    3.00
   8   8   3    8.10    3.70
  10  -9  -3    6.10    4.00
 -10   9   3    5.10    2.70
   9  -9  -3  171.18    9.00
  -9   9   3  172.98    7.10
   8  -9  -3   70.69    6.30
  -8   9   3   72.59    5.10
   7  -9  -3    2.10    2.90
  -7   9   3    0.40    2.20
   6  -9  -3   55.09    5.10
  -6   9   3   47.30    4.40
   5  -9  -3  272.37    9.50
  -5   9   3  281.67    8.60
   4  -9  -3  250.57    7.70
   4  -9  -3  250.67    8.60
  -4   9   3  259.17    8.00
   3  -9  -3  233.68    7.80
   3  -9  -3  237.78    7.30
  -3   9   3  230.88    7.50
   2  -9  -3    1.80    1.60
   2  -9  -3    0.30    1.70
   2  -9  -3    2.00    1.60
  -2   9   3    2.80    1.70
  -2   9   3    2.30    1.00
   1  -9  -3    9.90    1.90
   1  -9  -3   11.90    1.70
   1  -9  -3   13.70    1.90
  -1   9   3   12.30    1.50
  -1   9   3   10.10    2.00
   0  -9  -3   84.49    3.90
   0  -9  -3   82.09    3.60
   0   9   3   80.79    4.30
   0   9   3   82.49    3.70
  -1  -9  -3    6.00    1.50
  -1  -9  -3    7.50    1.70
   1   9   3    7.30    1.80
   1   9   3    2.60    1.70
  -2  -9  -3  842.82   21.40
  -2  -9  -3  857.81   21.80
  -2  -9  -3  842.92   20.80
   2   9   3  861.01   21.90
   2   9   3  857.01   21.30
   2   9   3  854.21   22.40
  -3  -9  -3   88.99    3.90
  -3  -9  -3   96.79    5.00
   3   9   3   91.29    3.80
   3   9   3   99.59    3.40
   3   9   3   88.39    4.60
   3   9   3   89.09    5.10
  -4  -9  -3   75.09    4.80
  -4  -9  -3   76.39    3.50
   4   9   3   74.29    3.40
   4   9   3   74.79    3.10
   4   9   3   76.89    5.30
   4   9   3   74.69    4.40
  -5  -9  -3    9.50    2.60
   5   9   3    9.80    1.50
   5   9   3    7.20    2.80
  -6  -9  -3   10.80    2.70
   6   9   3   15.50    3.40
  -7  -9  -3    1.30    2.70
   7   9   3    0.00    3.20
  -8  -9  -3   17.30    3.50
   8   9   3   15.70    4.10
  10 -10  -3  178.88    9.80
 -10  10   3  173.88    7.80
   9 -10  -3   24.00    4.40
  -9  10   3   23.50    3.30
   8 -10  -3    9.40    3.60
  -8  10   3    6.60    2.80
   7 -10  -3    9.80    3.30
  -7  10   3    7.30    2.60
   6 -10  -3   12.60    3.10
  -6  10   3   11.40    2.60
   5 -10  -3    3.00    2.50
  -5  10   3   -0.40    2.10
   4 -10  -3  423.06   12.90
   4 -10  -3  436.16   11.90
  -4  10   3  429.66   12.10
   3 -10  -3   93.89    4.90
   3 -10  -3  100.89    5.00
  -3  10   3  102.69    5.10
   2 -10  -3   90.49    4.40
   2 -10  -3   98.19    4.90
  -2  10   3   90.59    4.80
  -2  10   3  103.99    3.40
   1 -10  -3    4.00    1.70
   1 -10  -3    2.30    1.50
   1 -10  -3    2.70    1.90
  -1  10   3    2.40    1.30
  -1  10   3   -0.50    1.80
   0 -10  -3   21.30    2.40
   0 -10  -3   18.10    1.90
   0  10   3   14.50    2.30
   0  10   3   20.80    2.10
  -1 -10  -3  368.76   10.40
  -1 -10  -3  377.26   10.40
   1  10   3  378.36   10.70
   1  10   3  368.06   10.80
  -2 -10  -3  157.28    5.50
  -2 -10  -3  160.48    6.40
  -2 -10  -3  153.48    4.80
   2  10   3  156.28    6.20
   2  10   3  150.58    6.30
  -3 -10  -3  208.38    7.50
  -3 -10  -3  204.58    6.50
   3  10   3  189.28    6.20
   3  10   3  210.08    7.30
   3  10   3  212.08    7.80
  -4 -10  -3   83.99    5.40
  -4 -10  -3   83.39    3.90
   4  10   3   83.99    3.80
   4  10   3   85.69    5.70
   4  10   3   88.99    5.30
  -5 -10  -3  152.88    7.00
   5  10   3  157.38    5.10
   5  10   3  162.08    7.70
  -6 -10  -3   70.99    5.90
   6  10   3   87.99    6.70
  -7 -10  -3    3.50    2.90
   7  10   3    3.10    3.40
  10 -11  -3   16.20    4.80
 -10  11   3   21.20    3.60
   9 -11  -3   -0.60    3.70
  -9  11   3   -1.50    2.90
   8 -11  -3    1.80    3.50
  -8  11   3    0.40    2.70
   7 -11  -3   -4.70    3.00
  -7  11   3   -2.10    2.50
   6 -11  -3  152.68    7.50
  -6  11   3  144.99    6.70
   5 -11  -3   37.00    3.80
  -5  11   3   39.80    3.40
   4 -11  -3   15.80    2.60
   4 -11  -3   12.90    2.70
  -4  11   3   18.00    2.80
   3 -11  -3  449.26   13.30
   3 -11  -3  462.55   12.70
  -3  11   3  450.95   12.80
   2 -11  -3    5.80    2.20
   2 -11  -3    2.70    1.90
  -2  11   3    3.20    2.20
  -2  11   3    2.30    1.20
   1 -11  -3   49.00    3.40
   1 -11  -3   51.59    4.40
  -1  11   3   46.80    3.10
  -1  11   3   48.10    4.50
   0 -11  -3  234.08    7.30
   0  11   3  221.98    7.90
   0  11   3  233.08    7.30
  -1 -11  -3  256.47    7.80
  -1 -11  -3  269.67    8.30
   1  11   3  282.37    8.80
   1  11   3  265.37    8.60
  -2 -11  -3  101.39    5.80
  -2 -11  -3  105.09    4.70
   2  11   3  105.59    5.50
   2  11   3  100.49    5.40
  -3 -11  -3  151.98    5.60
  -3 -11  -3  152.78    6.80
   3  11   3  150.78    6.50
   3  11   3  153.78    6.80
  -4 -11  -3  223.58    8.30
   4  11   3  217.48    8.70
  -5 -11  -3   14.90    3.10
   5  11   3   19.80    3.60
  -6 -11  -3    7.80    3.10
   6  11   3    8.20    3.40
  -7 -11  -3  166.18    8.30
   7  11   3  165.38    9.10
   9 -12  -3   -2.10    3.70
  -9  12   3   -0.10    3.10
   8 -12  -3    6.40    3.70
  -8  12   3    1.70    3.00
   7 -12  -3  130.99    7.50
  -7  12   3  113.39    6.70
   6 -12  -3   43.30    4.20
  -6  12   3   39.80    3.80
   5 -12  -3   34.10    3.80
  -5  12   3   38.90    3.60
   4 -12  -3  172.18    7.00
   4 -12  -3  171.18    7.30
  -4  12   3  174.38    7.30
   3 -12  -3   52.89    5.00
   3 -12  -3   48.80    4.40
  -3  12   3   53.79    5.00
   2 -12  -3  272.57    8.80
   2 -12  -3  288.47    9.30
  -2  12   3  277.57    7.90
  -2  12   3  271.07    9.20
   1 -12  -3  139.79    6.50
   1 -12  -3  139.69    5.40
  -1  12   3  131.39    5.10
  -1  12   3  141.69    6.50
   0 -12  -3  138.49    5.30
   0  12   3  123.99    5.30
   0  12   3  121.49    6.20
  -1 -12  -3   19.60    1.90
   1  12   3   21.90    2.70
   1  12   3   19.50    2.90
  -2 -12  -3  539.35   15.30
   2  12   3  552.24   15.10
   2  12   3  532.95   15.50
  -3 -12  -3  171.98    6.60
  -3 -12  -3  172.18    7.60
   3  12   3  173.18    7.20
   3  12   3  171.78    7.50
  -4 -12  -3    5.80    3.00
   4  12   3    4.30    2.90
  -5 -12  -3   16.40    3.30
   5  12   3   28.10    3.90
  -6 -12  -3  181.98    8.80
   6  12   3  194.88    9.40
   9 -13  -3   -3.30    3.90
  -9  13   3   -4.80    3.20
   8 -13  -3  103.19    8.10
  -8  13   3   99.79    7.00
   7 -13  -3   91.29    7.20
  -7  13   3   98.09    6.70
   6 -13  -3   64.59    6.30
  -6  13   3   63.09    5.90
   5 -13  -3    4.10    2.90
  -5  13   3    0.10    2.80
   4 -13  -3    0.60    2.60
   4 -13  -3    3.00    2.60
  -4  13   3    4.40    2.70
   3 -13  -3   15.00    2.70
   3 -13  -3   14.30    2.90
  -3  13   3   13.40    3.10
   2 -13  -3   86.69    5.90
   2 -13  -3   89.99    4.80
  -2  13   3   87.79    6.00
  -2  13   3   92.99    3.90
   1 -13  -3  167.78    6.20
  -1  13   3  169.98    7.50
  -1  13   3  167.48    6.00
   0  13   3   -3.20    2.40
   0  13   3    2.10    1.90
  -1 -13  -3  902.51   23.50
   1  13   3  921.91   23.40
   1  13   3  882.31   23.80
  -2 -13  -3   74.19    6.10
   2  13   3   69.59    5.70
   2  13   3   73.19    5.20
  -3 -13  -3   15.80    3.50
   3  13   3   14.60    3.10
  -4 -13  -3   55.29    4.60
   4  13   3   66.19    5.90
  -5 -13  -3  203.18    9.20
   5  13   3  211.68    9.40
   8 -14  -3   60.99    5.70
  -8  14   3   47.20    4.60
   7 -14  -3  110.29    7.80
  -7  14   3  107.89    7.30
   6 -14  -3    3.00    3.30
  -6  14   3    0.30    3.10
   5 -14  -3    4.50    3.10
  -5  14   3    4.20    3.10
   4 -14  -3   77.79    5.80
  -4  14   3   79.89    6.30
   3 -14  -3   89.39    6.00
   3 -14  -3   75.99    5.10
  -3  14   3   73.69    6.20
   2 -14  -3  372.36   11.60
  -2  14   3  388.56   10.60
  -2  14   3  397.26   12.30
   1 -14  -3  111.69    5.10
  -1  14   3  105.99    4.90
  -1  14   3  105.59    6.90
   0 -14  -3  689.13   18.70
   0  14   3  662.63   18.50
   0  14   3  711.03   18.90
  -1 -14  -3   24.70    3.70
   1  14   3   30.80    3.80
   1  14   3   32.40    3.30
  -2 -14  -3   36.70    4.00
   2  14   3   39.80    4.00
   2  14   3   40.30    3.80
  -3 -14  -3  128.59    7.80
   3  14   3  135.29    7.10
  -4 -14  -3   92.59    7.50
   4  14   3   94.29    6.80
  -5 -14  -3    1.10    3.50
   5  14   3   -2.40    3.20
   8 -15  -3  135.59    9.10
  -8  15   3  142.19    8.60
   7 -15  -3   28.00    4.60
  -7  15   3   34.00    4.30
   6 -15  -3    8.80    3.70
  -6  15   3    7.40    3.50
   5 -15  -3   20.40    3.80
  -5  15   3   25.60    4.00
   4 -15  -3   74.29    5.80
  -4  15   3   60.39    5.00
   3 -15  -3  236.58    8.60
  -3  15   3  230.08    9.50
   2 -15  -3    1.20    2.30
  -2  15   3    4.80    3.20
   1 -15  -3  704.23   19.70
  -1  15   3  760.42   20.10
  -1  15   3  721.13   19.30
   0  15   3    3.70    2.20
   0  15   3    1.50    3.10
  -1 -15  -3  193.88    9.10
   1  15   3  183.98    7.50
   1  15   3  183.58    8.70
  -2 -15  -3   94.29    7.60
   2  15   3   87.79    6.10
  -3 -15  -3  125.69    8.20
   3  15   3  109.89    7.00
  -4 -15  -3    7.20    3.90
   4  15   3    4.00    3.30
   7 -16  -3   21.60    4.50
  -7  16   3   15.90    4.20
   6 -16  -3    1.70    3.70
  -6  16   3   -0.40    3.50
   5 -16  -3   92.09    6.80
  -5  16   3   91.59    7.60
   4 -16  -3  128.79    7.10
  -4  16   3  145.99    8.30
   3 -16  -3    7.10    2.90
  -3  16   3   10.10    3.70
  -2  16   3  510.25   15.70
  -1  16   3   -1.60    3.20
   0 -16  -3    9.00    3.80
   0  16   3   15.10    2.70
   0  16   3   12.30    3.70
  -1 -16  -3   88.09    8.00
   1  16   3   81.99    7.70
   1  16   3   81.59    5.70
  -2 -16  -3   55.29    5.20
   2  16   3   74.29    5.90
  -3 -16  -3   17.70    4.30
   3  16   3   13.50    3.50
   5 -17  -3  106.79    7.30
  -5  17   3  127.79    8.60
   4 -17  -3   35.00    4.10
  -4  17   3   32.70    4.80
  -3  17   3  475.75   15.50
  -2  17   3    1.70    3.70
   1 -17  -3   19.40    4.40
  -1  17   3   30.80    4.70
   0 -17  -3   28.00    4.80
   0  17   3   22.10    4.20
  -1 -17  -3    0.00    3.90
   3 -18  -3    2.10    4.10
  -3  18   3    0.50    3.90
   2 -18  -3   12.80    4.40
  -2  18   3    8.70    4.30
   1 -18  -3   16.90    4.60
  -1  18   3    9.20    4.10
   0  21  -4   66.59    5.50
   0 -21   4   71.29    6.00
  -1  21  -4   36.80    4.80
   1 -21   4   33.80    5.00
  -2  21  -4   -2.20    3.60
   2 -21   4   -4.10    3.90
  -3  21  -4  296.57   12.40
   3 -21   4  279.77   12.00
   2  20  -4   33.10    4.20
  -2 -20   4   33.60    4.80
   1  20  -4   86.19    6.60
  -1 -20   4   67.79    5.60
   0  20  -4   25.40    4.20
   0  20  -4   27.50    4.00
   0 -20   4   24.10    4.40
  -1  20  -4   34.00    4.30
  -1  20  -4   38.40    4.60
   1 -20   4   40.00    4.90
  -2  20  -4  352.36   12.80
   2 -20   4  344.67   12.60
  -3  20  -4   -1.30    3.70
   3 -20   4    0.40    3.70
  -4  20  -4  122.79    8.80
   4 -20   4  127.09    8.50
   4 -20   4  117.89    7.50
  -5  20  -4   69.69    6.20
   4  19  -4   56.79    4.80
   4  19  -4   59.79    5.40
  -4 -19   4   50.59    5.00
   3  19  -4  157.38    7.60
  -3 -19   4  140.69    8.80
   2  19  -4   70.69    6.10
  -2 -19   4   70.19    5.40
   1  19  -4   76.19    6.10
  -1 -19   4   77.39    7.30
   0  19  -4  102.99    6.60
   0  19  -4  117.59    7.40
   0 -19   4  113.29    7.80
  -1  19  -4  547.05   16.00
  -1  19  -4  506.05   15.40
   1 -19   4  532.25   16.00
  -2  19  -4   -1.60    3.30
   2 -19   4   -3.50    3.40
  -3  19  -4  162.08    8.80
   3 -19   4  175.98    8.90
   3 -19   4  161.88    7.40
  -4  19  -4   46.90    5.00
   4 -19   4   37.70    4.60
  -5  19  -4   -2.70    3.60
  -6  19  -4    2.60    3.90
   5  18  -4    8.30    2.90
   5  18  -4    7.30    3.70
  -5 -18   4    9.70    3.60
   4  18  -4  106.49    6.50
  -4 -18   4  104.19    7.40
   3  18  -4   60.89    5.50
  -3 -18   4   50.79    4.70
   2  18  -4   37.10    3.90
  -2 -18   4   29.40    4.00
   1  18  -4  171.18    7.60
   1  18  -4  170.98    7.90
  -1 -18   4  159.48    8.30
   0  18  -4  421.06   13.00
   0  18  -4  407.06   12.80
   0 -18   4  418.96   13.30
  -1  18  -4   14.10    3.30
  -1  18  -4   13.60    3.40
   1 -18   4   11.40    3.50
  -2  18  -4  303.27   10.60
  -2  18  -4  307.17   11.00
   2 -18   4  286.17    9.80
   2 -18   4  304.17   11.00
  -3  18  -4    7.70    3.50
   3 -18   4    5.50    3.40
  -4  18  -4   10.30    3.50
   4 -18   4    8.40    3.60
  -5  18  -4   30.80    4.40
  -6  18  -4   26.00    4.40
  -7  18  -4   42.20    5.20
   6  17  -4    1.70    2.70
   6  17  -4    3.90    3.60
  -6 -17   4    3.30    3.10
   5  17  -4  190.68    7.90
   5  17  -4  194.68    9.20
  -5 -17   4  175.08    8.50
   4  17  -4  111.19    6.20
  -4 -17   4   96.69    6.90
   3  17  -4   70.79    5.30
  -3 -17   4   52.19    4.40
   2  17  -4  139.39    6.80
   2  17  -4  153.58    6.90
  -2 -17   4  138.69    7.40
   1  17  -4  208.78    8.00
   1  17  -4  209.68    8.20
  -1 -17   4  204.28    8.70
   0  17  -4    4.00    2.60
   0  17  -4    5.60    2.90
   0 -17   4    4.60    1.50
   0 -17   4    2.10    3.10
  -1  17  -4  239.68    9.20
  -1  17  -4  229.78    8.60
   1 -17   4  229.48    7.60
   1 -17   4  236.98    9.30
  -2  17  -4    8.60    3.10
  -2  17  -4    5.60    2.70
   2 -17   4    5.60    3.20
  -3  17  -4    3.70    3.10
   3 -17   4    4.50    3.20
  -4  17  -4    7.10    3.20
   4 -17   4    4.50    3.30
  -5  17  -4   -3.90    3.10
   5 -17   4   -2.50    3.10
  -6  17  -4  184.58    8.90
  -7  17  -4   33.00    4.60
   6  16  -4  201.28    9.50
   6  16  -4  202.88    7.90
  -6 -16   4  192.98    8.50
   5  16  -4   74.39    5.40
  -5 -16   4   77.59    6.20
   4  16  -4  108.49    5.90
  -4 -16   4  105.39    6.60
   3  16  -4  161.28    7.00
  -3 -16   4  172.18    7.60
   2  16  -4   37.70    3.40
   2  16  -4   32.10    3.30
  -2 -16   4   30.30    3.70
   1  16  -4   92.59    5.50
   1  16  -4   91.29    5.60
  -1 -16   4   90.09    6.20
   0  16  -4  206.58    8.10
   0  16  -4  213.68    7.80
   0 -16   4  208.18    6.30
   0 -16   4  200.88    8.30
   0 -16   4  198.18    6.30
  -1  16  -4    3.10    2.40
  -1  16  -4    0.60    2.60
   1 -16   4    3.70    2.80
   1 -16   4    3.90    1.60
  -2  16  -4    5.70    2.60
  -2  16  -4    8.50    1.90
  -2  16  -4    4.40    2.80
   2 -16   4    6.60    2.90
  -3  16  -4    0.30    1.60
  -3  16  -4   -0.80    2.70
   3 -16   4   -3.60    2.70
  -4  16  -4   18.10    3.30
   4 -16   4   21.50    3.40
  -5  16  -4  295.97   10.80
   5 -16   4  314.87   10.70
  -6  16  -4  131.69    7.70
  -7  16  -4   10.00    3.70
  -8  16  -4   30.00    4.40
   7  15  -4  234.98   10.60
   7  15  -4  241.48    8.80
  -7 -15   4  241.18    8.90
   6  15  -4   46.60    3.90
   6  15  -4   35.50    4.20
  -6 -15   4   29.90    3.50
   5  15  -4   38.70    3.50
  -5 -15   4   40.80    3.80
   4  15  -4   34.60    3.30
  -4 -15   4   38.80    3.60
   3  15  -4   39.00    3.40
   3  15  -4   37.40    3.20
  -3 -15   4   31.90    3.40
   2  15  -4   43.00    3.50
   2  15  -4   40.90    3.50
  -2 -15   4   38.60    3.60
   1  15  -4  173.28    6.80
   1  15  -4  166.88    6.80
  -1 -15   4  168.18    7.20
   0  15  -4  101.79    5.60
   0  15  -4  100.69    5.40
   0 -15   4  103.89    4.00
   0 -15   4  102.89    3.90
   0 -15   4  100.49    6.00
  -1  15  -4   13.20    2.10
  -1  15  -4   10.80    2.60
  -1  15  -4   11.90    2.70
   1 -15   4   14.50    1.90
   1 -15   4   13.40    2.90
  -2  15  -4    5.10    2.60
  -2  15  -4    3.90    2.40
  -2  15  -4    7.20    1.80
   2 -15   4    2.30    2.70
  -3  15  -4  111.89    6.00
  -3  15  -4  118.99    4.90
  -3  15  -4  122.99    6.40
   3 -15   4  123.59    6.40
  -4  15  -4  115.89    6.60
  -4  15  -4  117.89    5.10
   4 -15   4  116.39    6.40
  -5  15  -4   17.70    3.40
  -5  15  -4   26.00    2.70
   5 -15   4   17.20    3.30
  -6  15  -4  234.68    9.30
  -7  15  -4   42.90    4.40
  -8  15  -4   13.10    3.70
  -9  15  -4    3.00    3.90
   8  14  -4  179.48    9.60
  -8 -14   4  199.78    8.10
   7  14  -4    2.40    2.50
   7  14  -4   -2.90    3.10
  -7 -14   4    2.30    2.40
   6  14  -4   32.50    4.00
   6  14  -4   38.70    3.50
  -6 -14   4   33.60    3.50
   5  14  -4   55.59    4.60
  -5 -14   4   58.19    5.10
   4  14  -4   44.80    3.50
  -4 -14   4   40.90    3.50
   3  14  -4   36.20    3.00
   3  14  -4   34.70    3.10
  -3 -14   4   35.30    3.40
   2  14  -4  106.59    5.10
   2  14  -4  108.59    5.20
  -2 -14   4  103.89    5.70
   1  14  -4  291.47    9.10
   1  14  -4  290.47    9.10
  -1 -14   4  298.47    9.40
   0  14  -4   19.50    2.50
   0  14  -4   15.20    2.40
   0 -14   4   17.10    2.70
   0 -14   4   15.80    1.60
  -1  14  -4   10.20    2.30
  -1  14  -4   15.30    2.70
  -1  14  -4   15.00    2.10
   1 -14   4   15.60    1.80
   1 -14   4   11.90    2.50
  -2  14  -4    0.00    2.10
  -2  14  -4    1.10    2.10
  -2  14  -4    2.00    1.50
   2 -14   4   -2.80    2.20
  -3  14  -4  101.09    5.70
  -3  14  -4   97.29    5.30
  -3  14  -4  104.29    4.40
   3 -14   4   97.39    5.70
  -4  14  -4   28.00    3.20
  -4  14  -4   37.80    3.20
   4 -14   4   28.50    3.30
  -5  14  -4  178.18    7.60
  -5  14  -4  169.28    6.40
   5 -14   4  172.88    7.20
  -6  14  -4   46.30    4.20
   6 -14   4   59.19    5.20
  -7  14  -4   94.99    6.60
   7 -14   4   90.79    5.10
  -8  14  -4   30.90    4.10
   8 -14   4   27.90    3.10
  -9  14  -4   64.29    5.20
   8  13  -4    0.90    2.40
   8  13  -4   -1.20    3.10
  -8 -13   4   -3.20    2.50
   7  13  -4   22.40    4.00
   7  13  -4   22.90    3.00
  -7 -13   4   19.80    2.90
   6  13  -4   75.99    4.90
   6  13  -4   70.99    6.20
  -6 -13   4   68.59    5.00
   5  13  -4   34.50    3.10
  -5 -13   4   37.20    3.20
   4  13  -4  108.39    5.30
   4  13  -4  110.69    4.70
  -4 -13   4  112.19    5.60
   3  13  -4    3.40    1.90
   3  13  -4    5.60    2.10
  -3 -13   4    2.90    2.20
   2  13  -4  520.05   14.20
   2  13  -4  545.75   14.10
  -2 -13   4  536.75   14.30
   1  13  -4   11.90    2.20
   1  13  -4   13.10    2.20
  -1 -13   4   10.40    2.20
   0  13  -4    5.20    2.00
   0  13  -4    4.40    1.90
   0 -13   4    4.90    1.30
   0 -13   4    4.80    2.10
  -1  13  -4  103.89    5.10
  -1  13  -4  107.49    4.40
  -1  13  -4  105.69    5.00
   1 -13   4  102.39    5.20
   1 -13   4  110.19    4.20
  -2  13  -4   41.60    3.20
  -2  13  -4   43.30    3.90
  -2  13  -4   51.09    3.10
   2 -13   4   36.50    3.10
  -3  13  -4   31.80    2.90
  -3  13  -4   39.20    2.90
  -3  13  -4   39.60    3.40
   3 -13   4   37.30    3.20
  -4  13  -4   11.00    1.90
  -4  13  -4    7.90    2.40
   4 -13   4    6.80    2.30
  -5  13  -4  264.77    8.40
  -5  13  -4  259.87    9.10
   5 -13   4  259.47    8.70
  -6  13  -4    5.10    1.80
  -6  13  -4    3.60    2.80
   6 -13   4   -0.30    2.40
   6 -13   4    4.10    2.00
  -7  13  -4   -2.30    2.70
   7 -13   4    0.50    2.00
  -8  13  -4  152.48    7.70
   8 -13   4  168.08    6.80
  -9  13  -4   99.59    7.10
   9 -13   4  108.99    6.30
   9  12  -4    3.30    3.50
  -9 -12   4    5.20    2.60
   8  12  -4    4.60    2.40
   8  12  -4    3.00    3.00
   7  12  -4   -3.10    2.70
   7  12  -4   -0.90    2.10
  -7 -12   4   -2.30    1.90
   6  12  -4   11.10    2.40
  -6 -12   4    9.40    2.30
   5  12  -4   50.39    4.10
  -5 -12   4   62.29    4.40
   4  12  -4  191.58    6.80
   4  12  -4  199.38    6.20
  -4 -12   4  198.58    6.90
   3  12  -4  279.07    8.10
   3  12  -4  284.67    8.60
  -3 -12   4  280.97    8.60
   2  12  -4   93.99    4.20
   2  12  -4   93.29    4.50
  -2 -12   4   90.09    4.50
   1  12  -4    2.10    1.70
   1  12  -4    5.80    1.80
  -1 -12   4    4.40    1.90
   0  12  -4   51.99    3.70
   0  12  -4   50.09    3.60
   0 -12   4   47.40    3.80
   0 -12   4   56.39    2.60
  -2  12  -4  217.78    7.30
  -2  12  -4  227.58    7.50
  -2  12  -4  239.18    7.10
   2 -12   4  226.08    7.50
  -3  12  -4   21.10    2.50
  -3  12  -4   21.20    2.50
  -3  12  -4   30.90    2.60
   3 -12   4   22.30    2.50
  -4  12  -4  388.76   11.20
  -4  12  -4  388.26   11.20
   4 -12   4  386.26   11.10
  -5  12  -4   12.30    2.80
  -5  12  -4   15.70    2.10
   5 -12   4   13.10    2.00
   5 -12   4   10.50    2.40
  -6  12  -4   65.49    5.30
  -6  12  -4   80.19    4.20
   6 -12   4   70.59    4.80
   6 -12   4   68.59    4.20
  -7  12  -4  283.37    9.00
  -7  12  -4  276.87    9.60
   7 -12   4  279.57    9.10
  -8  12  -4   87.59    6.30
   8 -12   4  100.99    5.60
  -9  12  -4   20.10    3.60
   9 -12   4   20.40    3.20
 -10  12  -4  185.38    8.70
   9  11  -4    4.10    3.30
   9  11  -4    1.50    2.30
  -9 -11   4   -1.70    2.30
   8  11  -4   -1.30    2.10
   8  11  -4    0.40    3.00
   7  11  -4  103.69    5.20
   7  11  -4  110.59    6.70
  -7 -11   4  109.19    5.00
   6  11  -4    1.30    1.90
  -6 -11   4    1.20    1.90
   5  11  -4   72.89    4.30
  -5 -11   4   75.89    4.30
   4  11  -4  435.66   11.40
   4  11  -4  434.26   12.00
  -4 -11   4  457.05   11.90
  -4 -11   4  440.26   11.90
  -4 -11   4  450.05   12.30
   3  11  -4   -0.10    1.40
   3  11  -4    2.50    1.70
  -3 -11   4   -0.20    1.60
  -3 -11   4    0.90    1.40
  -3 -11   4    1.70    1.60
   2  11  -4  217.08    6.60
   2  11  -4  212.98    6.80
  -2 -11   4  207.08    6.80
  -2 -11   4  224.68    6.90
   1  11  -4  226.38    6.80
   1  11  -4  213.98    6.80
  -1 -11   4  224.58    6.80
  -1 -11   4  212.18    6.10
  -1 -11   4  200.48    6.70
   0  11  -4  376.16   10.40
   0  11  -4  371.16   10.30
   0 -11   4  371.06   10.40
   0 -11   4  382.86   10.30
   0 -11   4  391.06   10.50
  -1  11  -4  788.02   19.70
  -1  11  -4  787.82   19.70
  -1  11  -4  781.42   20.40
   1 -11   4  783.92   19.70
   1 -11   4  822.52   19.80
  -2  11  -4  185.88    6.30
  -2  11  -4  180.98    6.40
  -2  11  -4  193.98    6.10
   2 -11   4  192.08    6.50
   2 -11   4  195.38    6.30
  -3  11  -4 1209.28   29.60
  -3  11  -4 1209.28   29.50
  -3  11  -4 1226.28   30.90
   3 -11   4 1243.08   29.50
  -4  11  -4   17.80    2.00
  -4  11  -4   14.80    2.40
   4 -11   4   14.80    2.20
   4 -11   4   18.40    2.00
  -5  11  -4  142.59    6.00
  -5  11  -4  144.39    5.50
   5 -11   4  140.39    5.30
   5 -11   4  145.19    5.70
  -6  11  -4  329.27    9.60
  -6  11  -4  307.07    9.80
   6 -11   4  314.87    9.70
   6 -11   4  309.97    9.30
  -7  11  -4  112.89    6.00
   7 -11   4  118.49    5.60
  -8  11  -4    9.10    3.00
   8 -11   4    7.50    2.50
  -9  11  -4  485.05   14.20
   9 -11   4  476.75   14.70
 -10  11  -4   -1.60    3.10
  10 -11   4    0.10    2.90
   9  10  -4    4.70    3.20
   9  10  -4    3.60    2.30
  -9 -10   4    3.30    2.10
   8  10  -4   80.09    4.80
   8  10  -4   74.59    6.20
   7  10  -4   10.30    3.10
   7  10  -4   11.50    1.60
   7  10  -4   11.80    2.30
  -7 -10   4   11.10    2.00
   6  10  -4   61.19    2.70
   6  10  -4   67.69    4.10
  -6 -10   4   57.69    3.90
   5  10  -4  317.57    8.40
   5  10  -4  317.57    9.20
  -5 -10   4  315.77    9.30
  -5 -10   4  311.17    8.90
  -5 -10   4  326.07    8.90
   4  10  -4  394.16   10.80
   4  10  -4  391.66   10.20
  -4 -10   4  406.86   10.60
  -4 -10   4  387.46   10.60
  -4 -10   4  399.56   10.90
   3  10  -4   -0.80    1.40
   3  10  -4    0.10    1.20
  -3 -10   4    0.40    1.50
  -3 -10   4    1.60    1.30
  -3 -10   4    0.00    1.40
   2  10  -4    3.20    1.50
   2  10  -4    2.20    1.30
  -2 -10   4    2.20    1.40
  -2 -10   4    2.20    1.40
   1  10  -4    7.70    1.50
   1  10  -4    8.00    1.70
  -1 -10   4    7.40    1.50
  -1 -10   4    3.60    1.60
   0  10  -4  564.74   14.40
   0  10  -4  563.54   14.40
   0 -10   4  564.54   14.80
   0 -10   4  573.04   14.50
   0 -10   4  560.24   14.40
  -1  10  -4  447.46   11.90
  -1  10  -4  445.46   11.60
  -1  10  -4  434.66   11.60
   1 -10   4  429.06   11.60
  -2  10  -4 1495.75   35.90
  -2  10  -4 1551.44   37.90
  -2  10  -4 1495.35   36.00
   2 -10   4 1492.95   36.00
   2 -10   4 1560.04   36.10
  -3  10  -4    8.40    1.80
  -3  10  -4   10.20    1.50
  -3  10  -4    9.20    1.80
   3 -10   4    9.10    1.60
   3 -10   4    8.40    1.80
   3 -10   4    8.70    1.70
  -4  10  -4  176.58    6.30
  -4  10  -4  186.48    6.20
   4 -10   4  181.18    6.10
   4 -10   4  174.08    6.20
   4 -10   4  179.68    5.90
  -5  10  -4  102.89    4.40
  -5  10  -4  102.79    5.00
   5 -10   4   98.29    4.60
   5 -10   4   94.29    4.40
  -6  10  -4   32.10    2.70
  -6  10  -4   30.10    3.00
   6 -10   4   36.30    3.60
   6 -10   4   32.80    2.70
  -7  10  -4   30.30    3.20
   7 -10   4   36.60    3.30
  -8  10  -4  415.86   12.30
   8 -10   4  414.86   12.90
  -9  10  -4   -2.60    2.70
   9 -10   4    0.50    2.70
 -10  10  -4   22.10    3.60
  10 -10   4   23.30    3.80
  10   9  -4    1.40    3.30
 -10  -9   4    4.70    2.10
   9   9  -4   -3.70    2.80
   9   9  -4   -0.10    2.10
  -9  -9   4    1.10    1.90
   8   9  -4    1.70    2.00
   8   9  -4    1.50    2.80
   8   9  -4   -0.10    1.60
  -8  -9   4    0.00    1.70
   7   9  -4   -1.60    2.30
   7   9  -4    1.10    1.80
   7   9  -4    1.30    1.40
  -7  -9   4   -4.10    1.60
   6   9  -4  101.99    4.70
   6   9  -4   99.99    3.80
  -6  -9   4  114.99    4.90
  -6  -9   4   98.79    4.30
  -6  -9   4  108.99    4.10
   5   9  -4  582.84   13.90
   5   9  -4  544.35   14.80
   5   9  -4  567.34   14.70
  -5  -9   4  571.34   14.80
  -5  -9   4  592.04   14.40
  -5  -9   4  578.34   14.40
   4   9  -4   54.79    3.40
   4   9  -4   52.59    2.60
  -4  -9   4   55.29    3.10
  -4  -9   4   60.39    3.30
  -4  -9   4   59.69    3.00
   3   9  -4   50.49    3.10
   3   9  -4   46.20    2.60
  -3  -9   4   51.69    2.80
  -3  -9   4   47.10    2.90
  -3  -9   4   56.09    3.10
   2   9  -4  214.18    6.20
   2   9  -4  209.48    6.50
  -2  -9   4  218.78    6.60
  -2  -9   4  230.68    6.40
  -2  -9   4  213.18    6.40
   1   9  -4 1436.46   34.20
   1   9  -4 1460.15   34.10
  -1  -9   4 1437.96   34.20
  -1  -9   4 1441.06   36.60
  -1  -9   4 1478.75   34.30
   0   9  -4  316.37    8.70
   0   9  -4  313.97    8.70
   0  -9   4  329.07    8.80
   0  -9   4  307.27    8.80
   0  -9   4  331.57    8.80
  -1   9  -4 3835.82   87.09
  -1   9  -4 3867.51   87.19
  -1   9  -4 3658.53   92.29
   1  -9   4 3788.22   87.19
  -2   9  -4   51.19    2.60
  -2   9  -4   47.60    3.10
  -2   9  -4   47.90    3.30
   2  -9   4   50.49    3.00
   2  -9   4   51.59    3.30
  -3   9  -4  640.54   16.60
  -3   9  -4  617.64   15.80
  -3   9  -4  623.24   15.90
   3  -9   4  628.74   15.80
   3  -9   4  638.74   15.80
   3  -9   4  613.44   16.30
  -4   9  -4  140.69    5.20
  -4   9  -4  143.59    5.40
   4  -9   4  146.09    5.10
   4  -9   4  139.59    5.00
   4  -9   4  138.89    5.20
  -5   9  -4   55.39    3.90
  -5   9  -4   51.39    3.30
   5  -9   4   48.80    3.50
   5  -9   4   57.59    3.40
   5  -9   4   54.79    3.50
  -6   9  -4    2.30    1.70
  -6   9  -4    0.20    2.00
  -6   9  -4    5.50    1.70
   6  -9   4    3.10    1.90
   6  -9   4    2.30    1.70
  -7   9  -4  380.46   11.10
   7  -9   4  384.76   11.90
  -8   9  -4    1.00    2.50
   8  -9   4    6.40    2.60
  -9   9  -4   43.30    3.80
   9  -9   4   39.20    4.00
 -10   9  -4    2.40    3.00
  10  -9   4   -1.30    2.90
  10   8  -4   12.40    2.70
  10   8  -4   14.50    3.90
 -10  -8   4   14.90    2.20
   9   8  -4   32.70    3.20
   9   8  -4   33.00    3.00
   9   8  -4   29.30    4.10
  -9  -8   4   36.90    3.30
   8   8  -4   15.50    3.00
   8   8  -4   25.20    2.80
   8   8  -4   20.10    2.30
  -8  -8   4   20.60    2.00
   7   8  -4   36.00    2.90
   7   8  -4   35.70    2.90
   7   8  -4   23.80    3.10
  -7  -8   4   30.10    2.80
  -7  -8   4   38.90    2.70
   6   8  -4  887.21   22.00
   6   8  -4  869.11   23.10
  -6  -8   4  907.81   22.20
  -6  -8   4  901.31   21.40
  -6  -8   4  895.01   21.40
   5   8  -4    8.60    1.30
   5   8  -4    9.40    1.70
  -5  -8   4    7.90    1.40
  -5  -8   4    7.00    1.60
  -5  -8   4   10.40    1.80
   4   8  -4  194.08    5.40
   4   8  -4  181.38    6.00
   4   8  -4  192.98    5.60
  -4  -8   4  202.28    6.20
  -4  -8   4  202.38    5.80
  -4  -8   4  216.18    5.80
   3   8  -4  543.85   14.00
   3   8  -4  551.74   13.50
  -3  -8   4  537.95   13.70
  -3  -8   4  573.54   13.80
  -3  -8   4  566.34   14.10
   2   8  -4  477.85   12.30
   2   8  -4  491.35   12.10
   2   8  -4  486.75   12.30
  -2  -8   4  506.75   12.20
  -2  -8   4  474.05   12.20
  -2  -8   4  465.25   12.30
  -2  -8   4  491.05   12.40
   1   8  -4  331.47    9.10
   1   8  -4  344.27    9.00
  -1  -8   4  344.37    9.30
  -1  -8   4  351.16    9.20
  -1  -8   4  354.66    9.10
  -1  -8   4  335.47    9.00
   0   8  -4 1109.89   25.80
   0   8  -4 1076.99   25.80
   0  -8   4 1117.09   27.60
   0  -8   4 1019.10   25.70
   0  -8   4 1099.89   25.80
  -1   8  -4    4.40    1.40
  -1   8  -4    4.20    1.30
   1  -8   4    5.30    1.40
   1  -8   4    4.80    1.10
   1  -8   4    3.70    1.20
  -2   8  -4 1059.19   24.70
  -2   8  -4 1045.10   24.60
   2  -8   4 1049.20   24.60
   2  -8   4 1007.60   24.60
   2  -8   4  994.70   25.80
  -3   8  -4  425.26   11.60
  -3   8  -4  410.96   11.10
  -3   8  -4  417.96   11.00
   3  -8   4  427.46   11.00
   3  -8   4  430.46   11.00
   3  -8   4  421.46   11.40
  -4   8  -4  102.39    4.40
  -4   8  -4   99.49    4.30
   4  -8   4  105.19    4.30
   4  -8   4  108.59    4.30
   4  -8   4  108.49    4.10
  -5   8  -4   19.90    2.00
  -5   8  -4   16.80    2.10
  -5   8  -4   15.30    1.90
   5  -8   4   12.30    1.90
   5  -8   4   15.60    2.10
   5  -8   4   12.70    1.80
  -6   8  -4   69.29    4.00
  -6   8  -4   65.29    3.80
  -6   8  -4   67.59    4.20
   6  -8   4   70.49    4.40
   6  -8   4   69.49    3.70
   6  -8   4   70.79    3.70
  -7   8  -4  408.86   11.30
   7  -8   4  395.36   12.40
  -8   8  -4   55.69    4.80
   8  -8   4   65.49    5.10
  -9   8  -4    1.70    2.60
   9  -8   4   -0.10    2.70
 -10   8  -4   -1.50    2.80
  10  -8   4    1.00    3.00
  10   7  -4   28.50    4.20
  10   7  -4   27.50    3.20
  10   7  -4   25.70    3.00
   9   7  -4    2.30    2.00
   9   7  -4    0.80    2.00
   9   7  -4    5.10    2.90
  -9  -7   4    2.00    1.50
   8   7  -4   66.29    4.10
   8   7  -4   69.49    5.60
   8   7  -4   69.79    4.30
  -8  -7   4   72.99    3.10
  -8  -7   4   75.19    3.30
   7   7  -4  331.27    9.60
   7   7  -4  325.57    9.90
   7   7  -4  329.67   11.00
  -7  -7   4  332.77    8.70
  -7  -7   4  353.56    8.70
   6   7  -4   41.20    3.20
   6   7  -4   38.80    2.80
  -6  -7   4   40.90    2.40
  -6  -7   4   44.40    2.60
   5   7  -4  642.84   16.40
   5   7  -4  641.44   17.10
  -5  -7   4  666.73   16.50
  -5  -7   4  645.94   15.80
  -5  -7   4  677.63   15.80
   4   7  -4  349.07    8.50
   4   7  -4  331.57    9.20
   4   7  -4  346.57    9.30
  -4  -7   4  333.47    8.80
  -4  -7   4  344.97    9.30
  -4  -7   4  360.86    8.90
   3   7  -4  221.38    6.60
   3   7  -4  228.28    6.10
   3   7  -4  229.58    6.40
  -3  -7   4  230.38    6.40
  -3  -7   4  233.18    6.70
  -3  -7   4  236.78    6.30
   2   7  -4 1315.37   31.40
   2   7  -4 1342.77   31.20
   2   7  -4 1341.37   33.60
  -2  -7   4 1366.56   31.50
  -2  -7   4 1282.67   31.20
  -2  -7   4 1321.97   33.50
  -2  -7   4 1398.56   31.30
   1   7  -4  841.52   19.90
   1   7  -4  834.02   20.00
   1   7  -4  837.92   21.20
  -1  -7   4  826.32   20.00
  -1  -7   4  844.12   21.40
   0   7  -4   33.70    2.20
   0   7  -4   32.60    2.30
   0  -7   4   30.20    2.30
   0  -7   4   33.80    1.90
  -1   7  -4  677.53   19.10
  -1   7  -4  764.72   18.30
  -1   7  -4  787.52   18.30
   1  -7   4  774.52   19.70
   1  -7   4  768.42   18.30
   1  -7   4  777.32   18.30
  -2   7  -4 1143.19   27.00
  -2   7  -4 1136.59   26.90
   2  -7   4 1112.59   28.40
   2  -7   4 1141.29   26.90
   2  -7   4 1158.68   26.90
  -3   7  -4    3.00    1.30
  -3   7  -4    4.10    1.30
  -3   7  -4    3.90    1.30
   3  -7   4    0.40    1.40
   3  -7   4    4.90    1.30
   3  -7   4    3.10    1.30
  -4   7  -4    3.50    1.30
  -4   7  -4    0.80    1.30
  -4   7  -4    0.90    1.40
   4  -7   4    2.80    1.40
   4  -7   4    3.60    1.20
   4  -7   4    1.30    1.40
  -5   7  -4  104.29    4.30
  -5   7  -4   93.19    4.20
  -5   7  -4  105.39    4.10
   5  -7   4   92.19    4.00
   5  -7   4   88.69    4.40
   5  -7   4   99.19    3.90
  -6   7  -4  388.16   10.20
  -6   7  -4  373.46   11.00
  -6   7  -4  369.06   10.30
   6  -7   4  361.56   11.30
   6  -7   4  386.36   10.00
   6  -7   4  369.06   10.10
  -7   7  -4   53.19    4.10
   7  -7   4   52.09    3.50
   7  -7   4   51.19    4.50
  -8   7  -4   -3.40    2.10
   8  -7   4   -0.30    2.50
  -9   7  -4    4.00    2.50
   9  -7   4    2.40    2.90
 -10   7  -4    6.80    2.90
  10  -7   4    8.90    3.50
  11   6  -4   20.40    4.10
  10   6  -4    2.50    2.10
  10   6  -4    2.40    2.40
  10   6  -4   -1.80    2.90
   9   6  -4   65.49    5.90
   9   6  -4   67.19    4.50
   9   6  -4   65.99    4.70
   8   6  -4  445.26   13.90
   8   6  -4  446.36   13.20
   8   6  -4  449.56   12.40
  -8  -6   4  455.35   11.20
  -8  -6   4  470.15   11.20
   7   6  -4   -0.50    1.60
   7   6  -4    0.00    2.10
   7   6  -4    1.20    1.60
  -7  -6   4   -0.70    1.00
  -7  -6   4    1.10    1.00
   6   6  -4  303.57    9.00
   6   6  -4  303.97    8.80
  -6  -6   4  318.57    7.90
  -6  -6   4  308.97    7.90
   5   6  -4  946.71   23.00
   5   6  -4  909.91   24.50
  -5  -6   4  951.70   22.30
  -5  -6   4  968.80   22.40
  -5  -6   4  990.50   23.30
   4   6  -4   69.19    2.30
   4   6  -4   64.79    2.80
   4   6  -4   65.09    3.30
  -4  -6   4   83.89    2.80
  -4  -6   4   71.49    3.30
  -4  -6   4   76.39    2.70
   3   6  -4  620.74   14.80
   3   6  -4  609.34   15.30
   3   6  -4  629.54   16.10
  -3  -6   4  631.14   15.40
  -3  -6   4  608.64   14.90
  -3  -6   4  647.24   15.00
   2   6  -4  200.08    5.70
   2   6  -4  189.68    5.60
   2   6  -4  202.98    5.30
  -2  -6   4  197.28    5.40
  -2  -6   4  198.28    5.40
  -2  -6   4  205.38    5.40
   1   6  -4   64.29    2.70
   1   6  -4   60.09    2.50
   1   6  -4   64.99    2.30
  -1  -6   4   63.39    2.50
  -1  -6   4   60.29    2.50
  -1  -6   4   58.39    2.60
   0   6  -4  623.84   14.80
   0   6  -4  599.14   14.80
   0   6  -4  591.94   15.60
   0  -6   4  631.34   14.80
   0  -6   4  616.74   15.80
   0  -6   4  604.44   14.80
  -1   6  -4    2.60    1.00
  -1   6  -4    2.10    1.00
   1  -6   4    2.00    1.00
   1  -6   4    1.90    0.90
  -2   6  -4  614.44   16.30
  -2   6  -4  623.54   15.40
  -2   6  -4  623.64   15.30
  -2   6  -4  666.43   15.50
   2  -6   4  638.64   15.30
   2  -6   4  627.44   16.30
   2  -6   4  637.34   15.40
  -3   6  -4  276.67    7.50
  -3   6  -4  265.37    7.50
  -3   6  -4  272.27    7.30
   3  -6   4  269.07    7.40
   3  -6   4  274.07    7.30
   3  -6   4  278.67    8.00
  -4   6  -4  281.07    7.80
  -4   6  -4  285.77    7.70
  -4   6  -4  287.77    8.40
   4  -6   4  278.47    7.60
   4  -6   4  285.57    7.70
   4  -6   4  267.47    8.40
  -5   6  -4  626.44   15.20
  -5   6  -4  580.74   15.20
  -5   6  -4  635.24   16.50
   5  -6   4  632.44   15.10
   5  -6   4  613.94   15.10
   5  -6   4  573.24   16.60
  -6   6  -4  140.69    4.90
  -6   6  -4  133.29    5.00
  -6   6  -4  145.49    5.60
   6  -6   4  135.99    4.80
   6  -6   4  134.29    6.00
   6  -6   4  141.89    4.80
  -7   6  -4  223.18    7.30
  -7   6  -4  228.48    7.00
   7  -6   4  236.58    8.60
   7  -6   4  231.98    6.80
   7  -6   4  232.18    7.00
  -8   6  -4   14.10    2.40
   8  -6   4   14.30    3.10
   8  -6   4   17.10    2.20
  -9   6  -4    2.10    2.30
   9  -6   4    0.50    2.70
 -10   6  -4   37.30    3.50
  10  -6   4   38.30    4.60
  11   5  -4   18.40    3.50
  11   5  -4   11.70    3.50
  11   5  -4   13.20    2.80
  10   5  -4   77.79    4.90
  10   5  -4   69.09    6.30
  10   5  -4   72.99    5.30
   9   5  -4  397.16   11.40
   9   5  -4  389.96   12.30
   9   5  -4  393.56   12.70
   8   5  -4    1.70    2.00
   8   5  -4    0.80    1.90
   8   5  -4   -0.60    2.20
   7   5  -4  719.63   17.70
   7   5  -4  693.43   19.00
   7   5  -4  677.43   19.10
   6   5  -4   34.30    2.90
   6   5  -4   36.80    3.00
  -6  -5   4   33.70    1.90
  -6  -5   4   31.30    1.80
   5   5  -4  467.05   13.00
   5   5  -4  481.95   12.40
  -5  -5   4  492.75   11.50
  -5  -5   4  475.75   11.50
   4   5  -4 1943.61   50.99
   4   5  -4 2041.60   47.10
  -4  -5   4 2016.90   46.50
  -4  -5   4 2070.69   46.50
  -4  -5   4 2066.89   47.20
   3   5  -4  372.76    9.90
   3   5  -4  398.56    9.30
   3   5  -4  383.56   10.30
  -3  -5   4  393.76    9.50
  -3  -5   4  398.36    9.50
   2   5  -4  116.89    3.90
   2   5  -4  118.49    3.50
   2   5  -4  113.09    3.80
  -2  -5   4  139.39    3.70
  -2  -5   4  138.59    3.60
  -2  -5   4  118.99    3.70
   1   5  -4    5.40    0.90
   1   5  -4    3.10    0.90
  -1  -5   4    3.60    1.00
  -1  -5   4    4.00    1.00
  -1  -5   4    4.50    0.90
   0   5  -4  133.89    4.10
   0   5  -4  142.49    4.10
   0   5  -4  138.99    4.20
   0   5  -4  135.49    4.30
   0  -5   4  133.89    4.10
   0  -5   4  143.59    4.30
   0  -5   4  143.99    4.20
  -1   5  -4  644.64   15.10
  -1   5  -4  610.54   15.10
  -1   5  -4  634.14   16.00
  -1   5  -4  620.94   15.00
   1  -5   4  639.94   15.20
   1  -5   4  632.24   16.00
   1  -5   4  619.24   15.00
   1  -5   4  632.94   16.40
  -2   5  -4   47.50    2.40
  -2   5  -4   49.80    2.50
  -2   5  -4   45.90    2.40
  -2   5  -4   48.40    2.30
   2  -5   4   52.09    2.60
   2  -5   4   45.20    2.20
   2  -5   4   44.60    2.40
  -3   5  -4   82.89    3.30
  -3   5  -4   89.29    3.30
  -3   5  -4   85.19    3.10
   3  -5   4   81.59    3.20
   3  -5   4   84.79    3.60
   3  -5   4   85.39    3.00
  -4   5  -4 1062.89   23.90
  -4   5  -4  974.50   25.60
  -4   5  -4  998.60   23.80
   4  -5   4  936.91   25.80
   4  -5   4 1025.40   23.80
   4  -5   4 1015.80   23.70
  -5   5  -4  165.18    5.40
  -5   5  -4  177.48    5.40
  -5   5  -4  191.98    6.20
   5  -5   4  161.08    6.30
   5  -5   4  171.98    5.20
   5  -5   4  171.38    5.20
  -6   5  -4  138.89    4.70
  -6   5  -4  147.89    5.60
  -6   5  -4  127.19    4.80
   6  -5   4  134.29    5.90
   6  -5   4  137.49    4.50
   6  -5   4  130.69    4.50
  -7   5  -4   33.50    2.60
  -7   5  -4   37.50    2.90
   7  -5   4   32.30    2.80
   7  -5   4   36.90    2.80
   7  -5   4   40.20    3.70
  -8   5  -4   41.00    3.80
   8  -5   4   43.10    3.20
   8  -5   4   42.60    4.00
  -9   5  -4    5.20    2.30
   9  -5   4    8.50    3.00
 -10   5  -4   23.70    3.00
  10  -5   4   28.40    4.30
  11   4  -4   52.39    4.90
  11   4  -4   58.09    5.10
  11   4  -4   51.39    4.50
  10   4  -4  165.08    6.80
  10   4  -4  166.28    8.00
  10   4  -4  166.38    7.60
   9   4  -4   -0.80    2.30
   9   4  -4    1.50    2.30
   9   4  -4   -2.60    2.10
   8   4  -4  397.86   11.20
   8   4  -4  375.56   11.90
   8   4  -4  400.06   12.20
   7   4  -4   89.99    5.00
   7   4  -4   88.29    4.50
   7   4  -4   90.59    4.30
   6   4  -4  347.97   10.30
   6   4  -4  350.76    9.70
   5   4  -4   38.70    2.80
   5   4  -4   35.10    2.70
   4   4  -4  106.39    4.00
   4   4  -4  109.69    3.90
  -4  -4   4  108.79    3.00
  -4  -4   4  111.49    3.10
   3   4  -4  390.26   10.80
   3   4  -4  411.06   10.30
  -3  -4   4  403.26    9.60
  -3  -4   4  413.96    9.70
   2   4  -4  408.76    9.50
   2   4  -4  386.26    9.90
   2   4  -4  383.86   10.40
  -2  -4   4  396.46    9.90
  -2  -4   4  403.86    9.50
  -2  -4   4  399.56    9.50
  -2  -4   4  389.26   10.40
   1   4  -4 1117.49   26.80
   1   4  -4 1138.29   29.30
   1   4  -4 1180.58   26.70
  -1  -4   4 1158.48   26.70
  -1  -4   4 1125.49   29.20
  -1  -4   4 1193.58   26.70
   0   4  -4  344.87    9.30
   0   4  -4  349.27    8.60
   0   4  -4  372.16    8.70
   0   4  -4  333.97    9.10
   0   4  -4  329.87    8.50
   0  -4   4  348.87    9.40
   0  -4   4  366.56    8.60
   0  -4   4  334.97    8.50
   0  -4   4  324.97    9.10
  -1   4  -4 1255.57   28.50
  -1   4  -4 1190.28   28.40
  -1   4  -4 1195.28   28.30
  -1   4  -4 1220.48   30.30
   1  -4   4 1232.88   28.50
   1  -4   4 1226.98   31.10
   1  -4   4 1244.78   30.30
   1  -4   4 1212.58   28.30
  -2   4  -4    3.80    0.90
  -2   4  -4    3.00    0.90
  -2   4  -4    5.50    1.20
  -2   4  -4    3.80    1.00
   2  -4   4    2.60    1.10
   2  -4   4    3.60    1.00
   2  -4   4    3.20    0.90
  -3   4  -4  634.64   14.90
  -3   4  -4  595.54   14.80
   3  -4   4  624.94   14.80
   3  -4   4  588.14   16.20
   3  -4   4  620.94   14.60
  -4   4  -4  367.26   10.40
  -4   4  -4  382.06    9.40
  -4   4  -4  353.86    9.40
   4  -4   4  358.96   10.60
   4  -4   4  362.76    9.10
   4  -4   4  353.66    9.20
  -5   4  -4  277.07    8.50
  -5   4  -4  285.47    7.50
  -5   4  -4  261.67    7.50
   5  -4   4  269.67    7.30
   5  -4   4  278.97    8.80
   5  -4   4  277.67    7.30
  -6   4  -4    1.50    1.70
  -6   4  -4    1.10    1.20
  -6   4  -4    0.90    1.40
   6  -4   4    1.20    1.10
   6  -4   4    2.70    1.30
   6  -4   4   -0.20    1.80
  -7   4  -4    1.50    1.30
  -7   4  -4   -0.60    1.60
   7  -4   4    1.90    1.30
   7  -4   4    0.60    2.10
  -8   4  -4    0.30    1.90
   8  -4   4   -0.40    1.40
   8  -4   4    6.30    2.70
  -9   4  -4    3.40    2.20
   9  -4   4    3.10    2.70
 -10   4  -4  190.18    7.10
  10  -4   4  180.88    9.10
  11   3  -4   81.89    6.30
  11   3  -4   88.39    5.60
  11   3  -4   89.99    6.80
  10   3  -4    3.40    2.80
  10   3  -4    3.70    2.70
  10   3  -4    5.00    2.50
   9   3  -4  355.96   11.70
   9   3  -4  356.96   10.70
   9   3  -4  360.16   11.60
   8   3  -4   18.40    2.50
   8   3  -4   21.80    2.80
   8   3  -4   21.00    2.70
   7   3  -4   77.09    4.10
   7   3  -4   74.39    4.40
   7   3  -4   73.59    4.30
   6   3  -4   34.60    3.20
   6   3  -4   34.10    3.30
   6   3  -4   41.60    3.10
   5   3  -4  110.49    4.20
   5   3  -4  105.99    4.30
   4   3  -4  862.41   20.50
   4   3  -4  831.02   22.00
   3   3  -4 1863.11   47.80
   3   3  -4 1917.41   44.00
  -3  -3   4 1908.71   43.40
  -3  -3   4 1904.61   47.80
  -3  -3   4 1909.71   43.50
   2   3  -4  835.52   18.90
   2   3  -4  804.32   20.90
   2   3  -4  827.62   19.40
  -2  -3   4  821.22   19.40
  -2  -3   4  814.82   20.90
  -2  -3   4  838.22   19.00
  -2  -3   4  794.22   19.00
   1   3  -4 1983.00   49.50
   1   3  -4 2001.60   47.50
   1   3  -4 2075.49   46.40
   1   3  -4 1994.70   50.99
  -1  -3   4 2012.10   51.59
  -1  -3   4 2115.59   46.50
  -1  -3   4 2009.10   46.70
   0   3  -4   62.59    2.20
   0   3  -4   57.59    2.20
   0   3  -4   56.49    2.20
   0   3  -4   61.49    2.50
   0  -3   4   56.39    2.20
   0  -3   4   59.89    2.70
   0  -3   4   57.49    2.20
   0  -3   4   64.19    2.30
   0  -3   4   56.69    2.40
  -1   3  -4  139.99    3.80
  -1   3  -4  142.19    3.90
  -1   3  -4  127.79    4.30
  -1   3  -4  131.19    3.90
   1  -3   4  135.99    4.30
   1  -3   4  133.29    3.70
   1  -3   4  132.59    3.90
  -2   3  -4  389.66   11.10
  -2   3  -4  426.36    9.90
  -2   3  -4  411.36   10.20
  -2   3  -4  435.16   10.20
   2  -3   4  418.26   10.20
   2  -3   4  397.36   11.10
   2  -3   4  417.96    9.90
  -3   3  -4  709.83   16.50
  -3   3  -4  670.33   16.50
  -3   3  -4  664.13   17.90
   3  -3   4  672.43   16.50
   3  -3   4  715.23   18.30
   3  -3   4  682.83   16.20
   3  -3   4  717.73   18.20
  -4   3  -4  249.58    6.90
  -4   3  -4  270.27    7.90
  -4   3  -4  257.67    6.90
   4  -3   4  252.77    7.90
   4  -3   4  245.78    6.70
   4  -3   4  254.57    6.50
  -5   3  -4   43.20    3.20
  -5   3  -4   38.30    2.60
  -5   3  -4   41.00    2.30
   5  -3   4   43.70    3.30
   5  -3   4   41.20    2.10
   5  -3   4   40.70    2.30
  -6   3  -4  159.48    5.30
  -6   3  -4  155.78    5.00
   6  -3   4  169.58    4.90
   6  -3   4  162.08    4.80
   6  -3   4  165.78    6.40
  -7   3  -4    0.00    1.60
  -7   3  -4   -1.30    1.20
   7  -3   4    0.00    2.00
   7  -3   4    0.50    1.20
  -8   3  -4   36.40    2.80
   8  -3   4   34.80    3.80
   8  -3   4   31.10    2.70
  -9   3  -4  237.18    7.80
   9  -3   4  245.48    9.70
 -10   3  -4    1.70    2.30
  10  -3   4    3.40    3.20
  11   2  -4    4.80    3.00
  11   2  -4    3.70    2.70
  11   2  -4    6.90    3.00
  10   2  -4  201.78    7.70
  10   2  -4  202.08    8.60
  10   2  -4  212.48    8.50
   9   2  -4   -1.70    2.30
   9   2  -4    2.50    2.30
   9   2  -4    0.90    2.20
   8   2  -4  108.89    5.20
   8   2  -4  111.09    5.70
   8   2  -4  112.99    5.50
   7   2  -4    2.70    1.80
   7   2  -4    2.70    1.70
   7   2  -4    0.90    1.80
   6   2  -4    5.60    1.60
   6   2  -4    6.30    1.70
   6   2  -4    3.20    1.70
   5   2  -4  516.05   13.20
   5   2  -4  507.55   14.10
   4   2  -4  276.97    8.20
   4   2  -4  286.07    7.80
   3   2  -4  487.45   12.10
   3   2  -4  466.15   12.90
  -3  -2   4  497.35   11.40
  -3  -2   4  492.75   13.00
  -3  -2   4  491.75   11.30
   2   2  -4  227.58    6.60
   2   2  -4  230.08    5.70
   2   2  -4  234.28    6.30
  -2  -2   4  234.58    6.60
  -2  -2   4  235.18    5.70
  -2  -2   4  246.28    5.80
   1   2  -4 1690.83   43.10
   1   2  -4 1737.93   39.20
   1   2  -4 1706.93   39.40
   1   2  -4 1665.53   41.80
  -1  -2   4 1709.93   43.10
  -1  -2   4 1698.83   39.20
  -1  -2   4 1745.53   39.30
  -1  -2   4 1722.83   39.40
   0   2  -4 2453.35   60.09
   0   2  -4 2601.64   60.19
   0   2  -4 2722.03   59.79
   0   2  -4 2496.35   66.99
   0  -2   4 2620.24   71.69
   0  -2   4 2622.64   60.09
   0  -2   4 2657.13   64.69
   0  -2   4 2678.53   60.39
   0  -2   4 2655.43   67.69
  -1   2  -4   31.00    1.70
  -1   2  -4   26.50    2.10
  -1   2  -4   23.10    1.40
   1  -2   4   30.70    1.70
   1  -2   4   26.40    1.30
   1  -2   4   27.40    2.00
  -2   2  -4 3628.54   81.89
  -2   2  -4 3561.74   83.39
  -2   2  -4 3591.94   81.89
   2  -2   4 3580.34   89.29
   2  -2   4 3453.45   81.59
   2  -2   4 3543.05   81.79
   2  -2   4 3635.74   89.19
  -3   2  -4  313.07    8.00
  -3   2  -4  307.17    8.80
  -3   2  -4  311.97    7.90
   3  -2   4  298.77    8.80
   3  -2   4  313.67    7.40
   3  -2   4  310.77    8.90
   3  -2   4  298.87    7.80
  -4   2  -4  342.87    9.70
  -4   2  -4  322.47    8.70
  -4   2  -4  342.07    8.60
   4  -2   4  330.27    8.10
   4  -2   4  337.87    9.80
   4  -2   4  325.77    8.50
  -5   2  -4   82.49    3.30
  -5   2  -4   84.79    3.50
  -5   2  -4   90.99    4.30
   5  -2   4   84.49    4.30
   5  -2   4   87.99    3.20
   5  -2   4   91.69    2.90
  -6   2  -4   22.00    1.80
  -6   2  -4   19.10    1.90
   6  -2   4   18.40    2.40
   6  -2   4   24.30    1.70
   6  -2   4   20.10    1.90
  -7   2  -4   56.19    3.50
  -7   2  -4   60.49    3.10
   7  -2   4   57.39    4.70
   7  -2   4   60.69    2.80
  -8   2  -4  319.57    9.20
   8  -2   4  324.87   11.10
   8  -2   4  322.07    8.60
  -9   2  -4    0.30    2.00
   9  -2   4   -1.30    2.70
   9  -2   4   -4.50    1.50
 -10   2  -4  229.38    7.90
  10  -2   4  226.88   10.00
  11   1  -4   35.80    3.90
  11   1  -4   34.10    3.90
  11   1  -4   41.40    4.50
  10   1  -4   12.00    2.80
  10   1  -4   10.00    3.10
  10   1  -4   14.60    3.00
   9   1  -4   36.10    3.40
   9   1  -4   32.30    3.60
   9   1  -4   38.10    3.50
   8   1  -4   29.90    3.20
   8   1  -4   35.20    3.20
   8   1  -4   29.60    2.80
   7   1  -4   20.50    2.30
   7   1  -4   15.70    2.50
   6   1  -4  194.28    6.80
   6   1  -4  188.88    6.30
   5   1  -4   10.90    1.80
   4   1  -4  248.18    7.50
   3   1  -4  121.99    4.30
  -3  -1   4  129.29    3.30
  -3  -1   4  127.89    3.30
  -3  -1   4  130.69    4.30
   2   1  -4  947.11   24.70
   2   1  -4  966.50   22.30
  -2  -1   4  984.60   22.40
  -2  -1   4  977.50   24.70
  -2  -1   4  963.60   22.40
   1   1  -4 1878.61   44.70
   1   1  -4 2018.90   48.90
   1   1  -4 1737.13   44.20
   1   1  -4 1963.80   47.30
   1   1  -4 1990.60   44.80
  -1  -1   4 1945.21   48.40
  -1  -1   4 1950.60   47.40
  -1  -1   4 2002.10   44.20
  -1  -1   4 1867.11   44.30
   0   1  -4  374.76    8.80
   0   1  -4  335.37    9.80
   0   1  -4  369.46    9.30
   0   1  -4  360.56    8.80
   0   1  -4  348.27    8.50
   0  -1   4  345.47    9.30
   0  -1   4  353.56    8.80
  -1   1  -4  186.58    5.20
  -1   1  -4  180.38    5.70
  -1   1  -4  199.28    5.20
  -1   1  -4  194.28    4.70
  -1   1  -4  197.58    5.80
   1  -1   4  199.48    4.70
   1  -1   4  197.98    5.20
   1  -1   4  177.88    5.70
   1  -1   4  199.18    5.70
  -2   1  -4  124.09    4.00
  -2   1  -4  125.69    3.90
   2  -1   4  138.09    4.40
   2  -1   4  138.59    4.00
  -3   1  -4 2601.04   62.19
  -3   1  -4 2767.32   62.19
  -3   1  -4 2849.01   66.49
   3  -1   4 2645.94   61.99
   3  -1   4 2648.03   66.39
   3  -1   4 2713.33   67.99
  -4   1  -4  102.79    3.90
  -4   1  -4  113.99    4.70
  -4   1  -4  111.99    3.70
   4  -1   4  116.09    3.10
   4  -1   4  119.89    4.40
   4  -1   4  110.19    4.60
   4  -1   4  113.59    3.60
  -5   1  -4  212.98    6.30
  -5   1  -4  214.38    6.20
  -5   1  -4  230.58    7.40
   5  -1   4  212.58    7.30
   5  -1   4  212.88    5.90
   5  -1   4  216.38    7.10
   5  -1   4  220.38    5.50
  -6   1  -4  267.47    7.50
  -6   1  -4  258.77    7.60
   6  -1   4  274.67    6.80
   6  -1   4  270.27    7.10
   6  -1   4  261.67    8.90
  -7   1  -4  442.26   11.50
  -7   1  -4  436.46   11.60
   7  -1   4  431.96   13.40
   7  -1   4  454.05   10.90
   7  -1   4  426.56   10.90
  -8   1  -4    0.30    1.80
   8  -1   4   -2.00    1.30
   8  -1   4    1.10    2.50
  -9   1  -4  381.56   10.80
   9  -1   4  372.06   12.90
 -10   1  -4   10.80    2.60
  10  -1   4    9.30    3.40
  11   0  -4   25.50    4.00
  11   0  -4   24.90    3.60
  11   0  -4   21.20    3.40
  10   0  -4   -1.10    2.30
  10   0  -4   -0.70    2.70
  10   0  -4    2.50    2.40
   9   0  -4    3.00    2.50
   9   0  -4    4.90    2.70
   9   0  -4    6.10    2.30
   8   0  -4    0.80    2.30
   8   0  -4    3.70    2.00
   7   0  -4   90.59    5.00
   7   0  -4   95.29    4.40
   6   0  -4  209.58    7.30
   6   0  -4  201.48    6.50
   5   0  -4  328.17    9.10
   5   0  -4  329.57    9.80
   4   0  -4   16.80    1.80
  -4   0   4   16.00    1.20
  -4   0   4   17.40    1.10
   3   0  -4  192.08    6.00
   3   0  -4  203.38    4.80
  -3   0   4  191.58    4.90
  -3   0   4  196.68    5.00
   2   0  -4  500.65   12.00
   2   0  -4  499.25   13.40
  -2   0   4  509.35   12.10
  -2   0   4  508.35   12.00
   1   0  -4  215.78    5.80
   1   0  -4  219.28    6.40
   1   0  -4  227.18    5.90
  -1   0   4  228.98    5.90
  -1   0   4  227.28    5.90
  -1   0   4  223.68    5.90
   0   0  -4   13.50    1.70
   0   0  -4   13.80    1.30
   0   0  -4   16.60    1.40
   0   0  -4   19.00    1.80
   0   0   4   16.70    1.70
   0   0   4   15.10    1.50
   0   0   4   15.00    1.30
   0   0   4   15.40    1.30
  -1   0  -4  135.79    4.30
  -1   0  -4  140.59    4.10
  -1   0  -4  135.39    4.40
  -1   0  -4  131.99    4.10
   1   0   4  133.89    4.30
   1   0   4  129.89    4.40
   1   0   4  130.19    4.00
  -2   0  -4 2022.50   44.80
  -2   0  -4 1872.31   44.80
  -2   0  -4 1895.21   48.70
   2   0   4 1940.81   47.60
   2   0   4 1951.90   48.70
   2   0   4 1913.31   44.60
  -3   0  -4  379.76   10.00
  -3   0  -4  396.46    9.90
   3   0   4  391.16    9.80
   3   0   4  408.26   10.80
   3   0   4  370.36   10.80
  -4   0  -4  430.56   11.70
  -4   0  -4  414.66   10.60
  -4   0  -4  390.96   10.60
   4   0   4  417.66   11.60
   4   0   4  409.76   10.30
   4   0   4  409.56   11.60
  -5   0  -4  120.99    4.50
  -5   0  -4  129.79    4.30
  -5   0  -4  128.19    5.30
   5   0   4  129.49    5.00
   5   0   4  124.79    4.00
   5   0   4  120.79    5.30
  -6   0  -4  477.85   12.20
  -6   0  -4  450.55   12.20
   6   0   4  485.35   13.70
   6   0   4  491.45   11.30
   6   0   4  483.75   11.70
   6   0   4  459.55   13.70
   6   0   4  444.96   11.30
  -7   0  -4   10.50    2.00
  -7   0  -4    9.60    1.80
   7   0   4    8.80    1.30
   7   0   4    6.00    2.50
   7   0   4    7.40    1.30
  -8   0  -4  350.96   10.00
   8   0   4  345.57    8.90
   8   0   4  342.17   11.80
  -9   0  -4    0.80    2.10
   9   0   4    0.10    2.80
 -10   0  -4   22.60    3.00
  10   0   4   29.60    4.50
  11  -1  -4    1.20    2.80
  11  -1  -4   -0.20    3.00
  11  -1  -4   -0.90    2.40
  10  -1  -4   20.30    3.80
  10  -1  -4   22.00    3.10
   9  -1  -4  373.66   11.40
   9  -1  -4  365.36   12.40
   8  -1  -4   40.50    3.80
   8  -1  -4   42.60    3.80
   7  -1  -4  135.49    5.20
   7  -1  -4  133.29    6.20
   6  -1  -4  153.58    6.20
   6  -1  -4  154.98    5.20
  -6   1   4  150.78    4.20
  -6   1   4  153.48    4.10
   5  -1  -4  687.73   18.70
   5  -1  -4  687.43   17.50
  -5   1   4  686.23   16.10
  -5   1   4  687.93   16.10
   4  -1  -4  123.99    4.70
  -4   1   4  123.69    3.50
   3  -1  -4  313.37    9.00
   3  -1  -4  316.97    7.80
  -3   1   4  323.37    7.80
  -3   1   4  305.67    7.70
   2  -1  -4  412.46   10.20
   2  -1  -4  421.16   10.00
   2  -1  -4  398.16   11.00
  -2   1   4  418.26   10.00
  -2   1   4  393.66    9.90
   1  -1  -4  107.39    3.90
   1  -1  -4  129.49    3.50
   1  -1  -4  117.89    3.60
  -1   1   4  112.49    3.30
  -1   1   4  111.79    3.90
  -1   1   4  109.69    3.50
  -1   1   4  111.59    3.50
   0  -1  -4  190.38    6.00
   0  -1  -4  190.18    5.50
   0  -1  -4  198.68    5.40
   0  -1  -4  194.08    5.40
   0   1   4  195.08    5.50
   0   1   4  194.88    5.40
   0   1   4  190.18    5.80
   0   1   4  195.58    5.40
  -1  -1  -4 1745.23   42.40
  -1  -1  -4 1731.03   40.00
  -1  -1  -4 1770.92   40.00
  -1  -1  -4 1692.03   43.50
   1   1   4 1740.73   43.70
   1   1   4 1699.33   40.00
   1   1   4 1681.63   42.40
  -2  -1  -4  127.99    4.30
  -2  -1  -4  133.89    4.20
  -2  -1  -4  132.89    4.40
  -2  -1  -4  135.99    4.50
   2   1   4  123.89    4.00
   2   1   4  129.19    4.30
   2   1   4  122.79    4.40
  -3  -1  -4 1715.33   40.00
  -3  -1  -4 1761.12   40.00
  -3  -1  -4 1810.72   42.70
   3   1   4 1687.23   43.40
   3   1   4 1627.44   42.50
   3   1   4 1664.93   39.70
  -4  -1  -4  248.58    7.10
  -4  -1  -4  247.48    6.90
   4   1   4  229.48    7.60
   4   1   4  242.58    7.40
   4   1   4  246.88    6.60
  -5  -1  -4  343.67    9.20
  -5  -1  -4  334.67    9.20
   5   1   4  327.97   10.10
   5   1   4  337.47    8.60
   5   1   4  326.87    9.90
  -6  -1  -4    1.00    1.60
  -6  -1  -4   -0.70    1.40
   6   1   4    2.40    1.70
   6   1   4    2.20    2.10
   6   1   4    2.10    1.20
  -7  -1  -4  626.74   16.10
   7   1   4  633.94   18.10
  -8  -1  -4   39.90    3.10
   8   1   4   36.60    3.80
  -9  -1  -4   66.49    4.80
   9   1   4   72.59    6.40
 -10  -1  -4   18.90    2.90
  10   1   4   21.10    4.10
  11  -2  -4    9.70    2.80
  11  -2  -4   10.30    3.60
  10  -2  -4   33.30    3.40
  10  -2  -4   38.20    4.40
   9  -2  -4   57.69    4.80
   9  -2  -4   53.49    4.20
  -9   2   4   54.79    2.90
  -9   2   4   53.09    2.70
   8  -2  -4  276.47    9.90
   8  -2  -4  269.87    8.60
  -8   2   4  262.07    7.10
  -8   2   4  270.77    7.10
   7  -2  -4  160.68    5.70
   7  -2  -4  156.88    6.90
  -7   2   4  165.78    4.80
  -7   2   4  171.38    4.70
   6  -2  -4  963.70   25.90
   6  -2  -4  969.10   24.40
  -6   2   4  967.80   22.60
  -6   2   4  960.20   22.60
   5  -2  -4  180.58    5.50
   5  -2  -4  182.08    6.60
  -5   2   4  191.88    5.10
  -5   2   4  193.58    5.00
   4  -2  -4   24.20    1.60
   4  -2  -4   23.50    2.20
   4  -2  -4   25.70    1.70
  -4   2   4   27.90    1.90
  -4   2   4   25.30    1.60
   3  -2  -4   25.90    1.70
   3  -2  -4   25.80    2.40
  -3   2   4   19.80    1.70
  -3   2   4   23.10    1.60
   2  -2  -4 1622.44   37.10
   2  -2  -4 1528.35   40.60
  -2   2   4 1642.84   37.10
  -2   2   4 1568.74   37.00
  -2   2   4 1649.73   40.60
   1  -2  -4   30.50    2.20
   1  -2  -4   32.90    2.00
   1  -2  -4   27.50    1.60
  -1   2   4   35.40    1.90
  -1   2   4   29.40    1.60
  -1   2   4   32.30    2.10
  -1   2   4   30.50    2.00
   0  -2  -4 2592.14   59.79
   0  -2  -4 2721.23   63.79
   0  -2  -4 2575.54   65.29
   0   2   4 2582.04   64.49
   0   2   4 2535.35   59.79
   0   2   4 2588.94   65.19
  -1  -2  -4  108.89    2.90
  -1  -2  -4  107.29    3.80
  -1  -2  -4  107.09    3.80
  -1  -2  -4  107.59    3.70
  -1  -2  -4  104.49    3.60
   1   2   4  110.39    3.90
   1   2   4  105.99    3.70
  -2  -2  -4  214.28    6.30
  -2  -2  -4  215.88    6.20
  -2  -2  -4  205.98    5.90
  -2  -2  -4  196.08    5.90
   2   2   4  200.68    6.20
   2   2   4  193.68    6.20
   2   2   4  198.28    5.80
  -3  -2  -4  106.09    4.40
  -3  -2  -4  110.89    3.90
  -3  -2  -4  105.79    4.00
   3   2   4  104.59    3.70
   3   2   4  109.69    4.00
   3   2   4  104.39    4.30
  -4  -2  -4  366.96    9.70
  -4  -2  -4  358.56    9.70
  -4  -2  -4  376.06   10.70
   4   2   4  344.77   10.50
   4   2   4  346.07    9.30
   4   2   4  361.76   10.20
  -5  -2  -4   22.40    2.20
  -5  -2  -4   27.20    2.50
   5   2   4   23.40    2.60
   5   2   4   24.60    1.80
   5   2   4   27.50    2.70
  -6  -2  -4  400.76   10.80
  -6  -2  -4  383.86   10.80
   6   2   4  397.66   11.60
   6   2   4  384.56   12.10
   6   2   4  395.16   10.00
  -7  -2  -4   35.40    2.90
   7   2   4   37.10    3.70
  -8  -2  -4   10.60    2.30
   8   2   4    8.50    2.90
  -9  -2  -4   -0.90    2.20
   9   2   4    1.10    3.00
 -10  -2  -4   20.80    3.10
  10   2   4   23.00    4.10
  11  -3  -4   25.90    3.50
  11  -3  -4   26.10    4.30
  10  -3  -4   -1.60    3.30
  10  -3  -4    7.10    2.50
 -10   3   4    5.10    1.70
   9  -3  -4   57.69    5.80
   9  -3  -4   56.89    4.20
  -9   3   4   51.69    3.10
  -9   3   4   57.79    3.30
   8  -3  -4  103.39    6.40
   8  -3  -4  101.69    4.80
  -8   3   4  111.59    4.10
  -8   3   4  113.79    4.00
   7  -3  -4  662.93   19.10
   7  -3  -4  692.33   17.60
  -7   3   4  662.73   16.20
  -7   3   4  672.43   16.20
   6  -3  -4   26.40    2.80
   6  -3  -4   36.80    2.40
  -6   3   4   33.40    2.20
  -6   3   4   32.60    2.40
   5  -3  -4  582.54   14.50
   5  -3  -4  580.94   13.60
   5  -3  -4  557.24   15.90
  -5   3   4  558.94   13.80
  -5   3   4  568.24   13.80
   4  -3  -4  417.96   12.10
   4  -3  -4  436.26   10.40
  -4   3   4  420.26   10.50
  -4   3   4  417.36   10.50
   3  -3  -4  424.46   12.00
   3  -3  -4  437.86   10.60
  -3   3   4  442.96   10.70
  -3   3   4  418.96   10.70
   2  -3  -4   37.80    2.10
   2  -3  -4   36.10    2.50
  -2   3   4   38.00    2.20
  -2   3   4   40.00    2.10
  -2   3   4   39.50    2.40
   1  -3  -4 2246.48   53.49
   1  -3  -4 2321.97   58.29
   1  -3  -4 2364.66   56.29
  -1   3   4 2316.27   56.69
  -1   3   4 2347.77   58.29
   0  -3  -4   14.00    1.50
   0  -3  -4   11.30    1.20
   0  -3  -4   13.50    1.20
   0   3   4   12.10    1.20
   0   3   4   14.40    1.30
   0   3   4   10.90    1.20
  -1  -3  -4  383.06    9.30
  -1  -3  -4  406.86   10.40
  -1  -3  -4  388.86    9.90
  -1  -3  -4  367.26   10.60
   1   3   4  382.16    9.90
   1   3   4  395.96   10.50
   1   3   4  372.16   10.30
  -2  -3  -4  379.66    8.80
  -2  -3  -4  377.46    9.70
  -2  -3  -4  385.16   10.40
  -2  -3  -4  378.46    9.70
  -2  -3  -4  351.26   10.30
   2   3   4  358.86    9.70
   2   3   4  374.16   10.40
   2   3   4  360.56   10.20
  -3  -3  -4  174.68    5.50
  -3  -3  -4  189.68    6.20
  -3  -3  -4  172.08    5.60
   3   3   4  178.08    5.40
   3   3   4  168.78    6.00
   3   3   4  173.78    5.70
  -4  -3  -4   41.50    3.40
  -4  -3  -4   37.00    3.00
  -4  -3  -4   37.00    2.60
   4   3   4   34.10    3.30
   4   3   4   39.60    2.50
   4   3   4   38.00    2.50
  -5  -3  -4  562.64   14.90
  -5  -3  -4  585.34   14.80
   5   3   4  583.54   15.80
   5   3   4  581.04   14.30
   5   3   4  568.04   16.20
  -6  -3  -4  134.69    5.50
  -6  -3  -4  132.19    5.10
   6   3   4  126.39    6.30
   6   3   4  139.29    4.60
   6   3   4  137.59    5.40
  -7  -3  -4    6.40    2.10
   7   3   4    4.10    2.50
  -8  -3  -4    8.60    2.40
   8   3   4    5.80    2.90
  -9  -3  -4   66.49    5.00
   9   3   4   58.69    5.40
  10   3   4    4.60    3.50
  11  -4  -4   34.10    4.80
  11  -4  -4   37.90    3.70
 -11   4   4   33.90    2.60
  10  -4  -4   34.00    3.40
  10  -4  -4   30.40    4.40
 -10   4   4   42.70    3.50
   9  -4  -4   53.39    4.80
   9  -4  -4   45.60    3.90
  -9   4   4   53.69    3.50
   8  -4  -4  524.95   14.50
   8  -4  -4  527.25   16.20
  -8   4   4  521.55   13.30
  -8   4   4  546.65   13.30
   7  -4  -4    0.20    2.40
   7  -4  -4    1.80    1.40
  -7   4   4    4.40    1.50
  -7   4   4    2.20    1.30
   6  -4  -4  452.45   12.00
   6  -4  -4  449.95   13.70
  -6   4   4  455.85   11.60
  -6   4   4  475.45   11.60
   5  -4  -4  424.96   12.80
   5  -4  -4  448.36   10.80
   5  -4  -4  436.86   11.20
  -5   4   4  433.86   11.10
  -5   4   4  447.26   11.00
   4  -4  -4  249.18    6.60
   4  -4  -4  240.48    7.90
  -4   4   4  251.87    6.90
  -4   4   4  256.87    6.80
   3  -4  -4  111.49    3.60
   3  -4  -4  113.09    4.40
  -3   4   4  102.39    3.80
  -3   4   4  112.09    3.70
   2  -4  -4  239.88    7.50
   2  -4  -4  248.58    6.80
  -2   4   4  270.67    7.60
  -2   4   4  243.58    6.90
  -2   4   4  266.17    6.90
   1  -4  -4   29.90    2.20
   1  -4  -4   28.70    2.10
  -1   4   4   26.90    1.60
  -1   4   4   32.50    2.20
  -1   4   4   28.80    2.30
   0  -4  -4    5.30    1.00
   0  -4  -4    2.80    1.20
   0  -4  -4    3.20    1.10
   0  -4  -4    4.50    1.00
   0   4   4    4.80    1.00
   0   4   4    4.60    1.10
   0   4   4    3.70    1.00
  -1  -4  -4  179.58    5.00
  -1  -4  -4  192.98    6.00
  -1  -4  -4  190.88    5.80
   1   4   4  184.78    5.60
   1   4   4  187.38    5.70
   1   4   4  175.68    5.60
  -2  -4  -4  261.97    7.60
  -2  -4  -4  273.57    7.90
  -2  -4  -4  259.97    7.40
  -2  -4  -4  264.17    6.60
   2   4   4  250.47    7.70
   2   4   4  263.77    7.70
   2   4   4  254.97    7.40
  -3  -4  -4    0.60    1.40
  -3  -4  -4    1.20    0.70
  -3  -4  -4    0.10    1.00
   3   4   4   -0.10    1.10
   3   4   4   -0.60    1.40
   3   4   4    1.60    1.30
  -4  -4  -4  394.56   10.60
  -4  -4  -4  390.56   10.60
   4   4   4  385.76   11.00
   4   4   4  389.96   11.50
   4   4   4  387.46   10.30
  -5  -4  -4  240.88    7.50
  -5  -4  -4  229.08    7.20
   5   4   4  235.28    8.30
   5   4   4  238.18    7.40
   5   4   4  232.98    6.80
  -6  -4  -4    5.70    2.10
   6   4   4    5.60    1.70
   6   4   4    2.80    2.40
  -7  -4  -4   14.50    2.50
   7   4   4   11.50    2.90
  -8  -4  -4   32.30    3.20
   8   4   4   33.50    4.10
  -9  -4  -4    1.10    2.40
   9   4   4    1.40    3.10
  11  -5  -4   23.80    4.50
 -11   5   4   25.00    2.60
  10  -5  -4   -1.20    2.10
  10  -5  -4   -1.80    3.20
 -10   5   4   -1.70    1.90
   9  -5  -4  316.27   10.00
   9  -5  -4  323.37   12.00
  -9   5   4  339.17    9.20
   8  -5  -4   29.20    2.50
   8  -5  -4   28.50    3.70
  -8   5   4   32.40    2.90
  -8   5   4   30.70    2.50
   7  -5  -4  460.85   12.80
   7  -5  -4  480.45   14.70
  -7   5   4  496.65   12.30
  -7   5   4  486.85   12.40
   6  -5  -4  177.78    5.20
   6  -5  -4  177.48    5.10
   6  -5  -4  173.08    7.00
  -6   5   4  178.18    5.50
  -6   5   4  164.28    5.60
   5  -5  -4  336.07   10.50
   5  -5  -4  326.17    8.60
  -5   5   4  345.27    8.90
  -5   5   4  336.07    9.00
   4  -5  -4  237.28    7.80
   4  -5  -4  231.58    6.50
  -4   5   4  235.68    6.80
  -4   5   4  241.28    6.70
   3  -5  -4 1108.39   26.70
   3  -5  -4 1139.39   29.40
  -3   5   4 1166.38   26.80
  -3   5   4 1106.89   26.80
   2  -5  -4  169.28    5.60
   2  -5  -4  167.38    5.20
  -2   5   4  173.78    5.40
  -2   5   4  176.48    5.70
   1  -5  -4  206.48    6.10
   1  -5  -4  197.38    5.80
   1  -5  -4  177.78    5.60
  -1   5   4  206.78    6.10
  -1   5   4  193.58    5.40
  -1   5   4  203.58    5.90
   0  -5  -4  167.88    5.40
   0   5   4  156.88    4.90
   0   5   4  166.28    5.20
   0   5   4  161.48    5.20
  -1  -5  -4    4.70    1.10
  -1  -5  -4    4.00    1.40
  -1  -5  -4    5.20    1.40
   1   5   4    2.80    1.30
   1   5   4    4.70    1.10
   1   5   4    5.30    1.30
  -2  -5  -4    7.80    1.60
  -2  -5  -4    8.50    1.40
  -2  -5  -4    7.10    1.10
   2   5   4    6.10    1.50
   2   5   4    7.50    1.50
   2   5   4    6.70    1.20
  -3  -5  -4  416.76   11.40
  -3  -5  -4  424.66   10.40
   3   5   4  428.16   11.40
   3   5   4  439.26   12.30
   3   5   4  447.86   12.10
  -4  -5  -4  415.26   11.20
  -4  -5  -4  402.06   11.20
   4   5   4  417.06   12.10
   4   5   4  416.56   11.00
   4   5   4  411.26   11.80
  -5  -5  -4    5.70    1.60
  -5  -5  -4    7.50    2.00
   5   5   4    6.90    1.50
   5   5   4    5.40    1.60
   5   5   4    3.50    2.20
  -6  -5  -4   50.89    4.30
   6   5   4   43.20    3.40
   6   5   4   47.20    4.00
  -7  -5  -4   12.60    2.60
   7   5   4   12.20    3.00
   7   5   4    6.10    2.10
  -8  -5  -4    3.90    2.40
   8   5   4   -1.50    2.90
  -9  -5  -4   13.90    2.90
   9   5   4   11.80    3.70
  11  -6  -4   27.30    5.00
 -11   6   4   27.10    2.90
  10  -6  -4  212.08    8.00
  10  -6  -4  216.18   10.10
 -10   6   4  226.08    7.40
   9  -6  -4   20.50    4.00
   9  -6  -4   14.00    2.30
  -9   6   4   15.10    2.40
   8  -6  -4  276.47    8.30
   8  -6  -4  272.37   10.40
  -8   6   4  280.17    8.30
   7  -6  -4   37.50    3.80
   7  -6  -4   44.30    2.60
  -7   6   4   46.90    3.60
  -7   6   4   44.40    3.20
   6  -6  -4   87.79    3.40
   6  -6  -4   79.79    5.20
  -6   6   4   85.69    4.10
  -6   6   4   83.69    3.80
   5  -6  -4  408.96   12.50
   5  -6  -4  403.96   10.60
  -5   6   4  413.96   11.00
  -5   6   4  429.16   10.90
   4  -6  -4  606.94   15.20
   4  -6  -4  608.34   17.10
  -4   6   4  636.54   15.40
  -4   6   4  609.04   15.40
   3  -6  -4  351.06   10.30
   3  -6  -4  355.06    9.30
  -3   6   4  341.27    9.40
   2  -6  -4  363.96    9.70
   2  -6  -4  361.06   10.30
   2  -6  -4  359.66    9.60
  -2   6   4  356.06    9.70
   1  -6  -4   15.80    1.70
   1  -6  -4   17.10    1.70
  -1   6   4   11.20    1.20
  -1   6   4   13.90    1.70
  -1   6   4   16.00    1.60
   0  -6  -4   13.30    1.50
   0  -6  -4   16.80    1.70
   0  -6  -4   12.40    1.70
   0   6   4   14.20    1.50
   0   6   4   12.70    1.70
   0   6   4   15.20    1.50
  -1  -6  -4  174.78    5.80
  -1  -6  -4  174.38    5.80
   1   6   4  174.78    5.70
   1   6   4  175.48    5.70
   1   6   4  181.88    5.50
  -2  -6  -4  107.09    3.60
  -2  -6  -4  108.09    4.50
  -2  -6  -4  103.69    3.90
   2   6   4  101.89    3.80
   2   6   4  105.49    4.50
   2   6   4  105.99    4.30
  -3  -6  -4  407.76   11.20
  -3  -6  -4  407.86   10.20
   3   6   4  419.26   12.00
   3   6   4  418.96   11.40
   3   6   4  412.26   11.20
  -4  -6  -4  222.18    7.10
  -4  -6  -4  211.38    5.70
   4   6   4  214.28    6.90
   4   6   4  207.28    7.80
   4   6   4  213.68    6.80
  -5  -6  -4   80.49    4.80
   5   6   4   80.19    5.30
   5   6   4   78.69    3.90
   5   6   4   87.69    4.10
  -6  -6  -4    2.50    2.20
   6   6   4    3.50    2.60
   6   6   4    1.20    1.70
  -7  -6  -4    9.80    2.70
   7   6   4   13.70    3.40
  -8  -6  -4    8.30    2.80
   8   6   4    8.50    3.30
  -9  -6  -4    2.90    2.80
   9   6   4    1.70    3.40
  11  -7  -4  246.88   11.40
 -11   7   4  233.18    8.20
  10  -7  -4   -2.80    3.60
 -10   7   4   -0.80    2.30
   9  -7  -4  182.28    8.90
   9  -7  -4  177.08    6.10
  -9   7   4  176.58    6.70
   8  -7  -4   14.80    3.30
   8  -7  -4   14.90    1.60
  -8   7   4   13.10    2.40
   7  -7  -4  242.78    9.40
  -7   7   4  242.58    7.70
   6  -7  -4  159.48    7.10
   6  -7  -4  163.38    5.30
  -6   7   4  165.38    5.70
  -6   7   4  169.68    6.00
   5  -7  -4  267.77    7.50
   5  -7  -4  254.47    9.00
  -5   7   4  276.07    7.90
  -5   7   4  260.27    7.90
   4  -7  -4  341.17   10.60
   4  -7  -4  349.17    9.40
  -4   7   4  345.97    9.70
   3  -7  -4  175.68    5.80
   3  -7  -4  182.18    6.40
   3  -7  -4  186.88    6.10
  -3   7   4  180.68    6.00
   2  -7  -4   19.40    2.00
   2  -7  -4   20.90    2.10
   2  -7  -4   28.60    2.80
  -2   7   4   20.60    2.10
   1  -7  -4   36.30    3.00
   1  -7  -4   33.60    2.70
   1  -7  -4   37.20    2.80
  -1   7   4   28.90    2.00
  -1   7   4   30.90    2.50
  -1   7   4   32.00    3.00
   0  -7  -4    1.10    1.40
   0  -7  -4    0.80    1.20
   0  -7  -4    0.50    1.40
   0   7   4    3.10    1.20
   0   7   4    1.70    1.40
   0   7   4    1.70    1.20
  -1  -7  -4  263.47    7.90
  -1  -7  -4  270.77    7.40
  -1  -7  -4  256.87    8.00
   1   7   4  263.37    7.90
   1   7   4  272.97    7.70
   1   7   4  264.17    7.90
  -2  -7  -4  842.02   21.30
  -2  -7  -4  859.91   22.40
   2   7   4  869.31   22.40
   2   7   4  884.41   22.50
   2   7   4  861.61   21.40
  -3  -7  -4   82.29    4.40
   3   7   4   80.19    3.50
   3   7   4   82.59    4.70
   3   7   4   79.19    4.20
  -4  -7  -4   53.69    4.20
  -4  -7  -4   45.20    2.40
   4   7   4   32.90    3.20
   4   7   4   42.80    2.90
   4   7   4   39.80    3.50
  -5  -7  -4   19.70    2.70
   5   7   4   18.30    3.00
   5   7   4   22.30    2.30
  -6  -7  -4    7.40    2.50
   6   7   4    5.70    2.90
  -7  -7  -4    1.00    2.60
   7   7   4   -2.00    3.00
  -8  -7  -4    1.60    2.70
   8   7   4   -0.30    3.20
  11  -8  -4   -1.90    4.00
 -11   8   4    4.70    2.70
  10  -8  -4  140.89    8.80
 -10   8   4  131.79    6.40
   9  -8  -4   -1.60    3.50
  -9   8   4    4.20    2.50
   8  -8  -4    4.90    3.10
  -8   8   4   -1.10    2.20
   7  -8  -4   15.50    3.40
  -7   8   4   14.50    2.50
   6  -8  -4  432.06   13.70
   6  -8  -4  423.66   11.50
  -6   8   4  431.86   12.00
  -6   8   4  467.55   12.30
   5  -8  -4  283.47    8.10
   5  -8  -4  276.07    9.60
  -5   8   4  278.97    8.50
   4  -8  -4  335.17   10.50
   4  -8  -4  339.57    9.40
  -4   8   4  333.97    9.60
   3  -8  -4  204.48    7.30
   3  -8  -4  224.88    7.20
  -3   8   4  212.08    6.90
   2  -8  -4   20.60    2.10
   2  -8  -4   23.80    2.30
  -2   8   4   21.30    2.20
  -2   8   4   21.50    1.60
   1  -8  -4   18.20    1.90
   1  -8  -4   13.60    2.10
   1  -8  -4   13.90    1.80
  -1   8   4   11.00    1.90
  -1   8   4   15.10    1.50
   0  -8  -4   27.70    2.80
   0  -8  -4   21.80    2.30
   0  -8  -4   34.80    2.70
   0   8   4   26.60    2.40
   0   8   4   31.70    2.60
   0   8   4   32.80    2.50
  -1  -8  -4  369.66   10.70
  -1  -8  -4  379.26   10.60
  -1  -8  -4  373.46   10.00
   1   8   4  366.26   10.60
   1   8   4  370.96   10.50
   1   8   4  386.76   10.40
  -2  -8  -4  430.36   12.00
  -2  -8  -4  438.06   11.90
  -2  -8  -4  435.46   11.30
   2   8   4  445.36   11.90
   2   8   4  431.66   11.90
   2   8   4  430.96   12.40
  -3  -8  -4  402.06   11.30
  -3  -8  -4  343.07   10.10
   3   8   4  410.06   12.00
   3   8   4  411.76   11.00
   3   8   4  414.96   11.20
  -4  -8  -4   97.59    5.30
   4   8   4   97.19    4.80
   4   8   4   94.59    5.70
   4   8   4   97.69    4.00
  -5  -8  -4   97.69    5.60
   5   8   4   95.99    4.30
   5   8   4  107.29    6.20
  -6  -8  -4   69.59    5.40
   6   8   4   59.69    5.90
  -7  -8  -4    8.90    2.90
   7   8   4    4.50    3.40
  -8  -8  -4  182.38    8.50
   8   8   4  196.08    9.80
  10  -9  -4   -4.60    3.70
 -10   9   4   -0.70    2.70
   9  -9  -4   29.10    4.40
  -9   9   4   23.40    3.20
   8  -9  -4    1.90    3.20
  -8   9   4    1.40    2.40
   7  -9  -4    9.90    3.20
  -7   9   4   10.60    2.50
   6  -9  -4   15.60    3.10
   6  -9  -4   16.80    2.10
  -6   9   4   16.10    2.60
   5  -9  -4  187.58    6.40
   5  -9  -4  189.68    7.70
  -5   9   4  194.68    7.00
   4  -9  -4  220.68    7.00
   4  -9  -4  205.48    7.80
  -4   9   4  214.28    7.30
   3  -9  -4  103.79    4.90
  -3   9   4  100.59    4.90
   2  -9  -4    6.20    1.80
   2  -9  -4    4.20    1.70
  -2   9   4    1.80    1.90
  -2   9   4    3.30    1.00
   1  -9  -4   12.50    1.90
   1  -9  -4   14.50    1.90
   1  -9  -4   15.70    2.40
  -1   9   4   10.50    2.10
  -1   9   4   18.60    1.70
   0  -9  -4   87.69    4.10
   0  -9  -4   87.89    4.10
   0  -9  -4   84.79    4.70
   0   9   4   87.39    4.70
   0   9   4   90.99    3.90
  -1  -9  -4  550.84   14.00
  -1  -9  -4  539.55   14.60
  -1  -9  -4  529.75   14.80
   1   9   4  553.84   14.60
   1   9   4  558.84   14.60
   1   9   4  537.95   14.80
  -2  -9  -4  107.39    4.40
  -2  -9  -4  123.59    5.60
  -2  -9  -4  116.19    4.50
   2   9   4  123.49    5.50
   2   9   4  127.19    4.30
   2   9   4  127.39    5.50
  -3  -9  -4    1.10    2.20
  -3  -9  -4   -0.20    1.40
   3   9   4    0.90    1.20
   3   9   4    0.70    2.10
   3   9   4    2.10    2.20
  -4  -9  -4   90.79    3.80
  -4  -9  -4   93.89    5.50
   4   9   4   86.39    5.70
   4   9   4   91.09    3.70
   4   9   4   93.29    5.10
  -5  -9  -4   59.59    5.20
   5   9   4   56.99    5.50
  -6  -9  -4   36.60    3.80
   6   9   4   36.30    4.20
  -7  -9  -4  257.07    9.80
   7   9   4  278.17   11.20
  10 -10  -4   -3.60    3.80
 -10  10   4    0.70    2.90
   9 -10  -4   -3.70    3.60
  -9  10   4   -1.50    2.60
   8 -10  -4   -2.50    3.40
  -8  10   4   -2.50    2.50
   7 -10  -4  126.39    7.30
  -7  10   4  134.19    6.40
   6 -10  -4  101.99    6.50
   6 -10  -4  107.89    4.90
  -6  10   4  107.59    5.80
   5 -10  -4   18.00    3.00
   5 -10  -4   13.90    2.30
  -5  10   4   18.20    2.70
   4 -10  -4    0.80    2.20
  -4  10   4    2.50    2.10
   3 -10  -4    0.40    2.00
  -3  10   4    1.40    2.10
   2 -10  -4   40.50    3.50
  -2  10   4   37.50    3.10
  -2  10   4   39.80    2.30
   1 -10  -4   40.20    3.30
   1 -10  -4   51.09    3.50
  -1  10   4   49.99    2.90
  -1  10   4   37.90    3.10
   0 -10  -4  418.76   11.50
   0 -10  -4  414.06   11.90
   0 -10  -4  423.56   12.00
   0  10   4  409.76   11.60
   0  10   4  420.46   11.90
  -1 -10  -4   29.60    2.40
  -1 -10  -4   20.30    2.60
  -1 -10  -4   31.70    2.70
   1  10   4   25.80    2.60
   1  10   4   29.30    2.80
  -2 -10  -4  141.89    6.40
  -2 -10  -4  136.59    4.80
  -2 -10  -4  142.39    5.30
   2  10   4  151.28    4.80
   2  10   4  140.39    6.20
   2  10   4  143.49    6.00
  -3 -10  -4   42.70    3.70
  -3 -10  -4   53.49    3.40
   3  10   4   52.39    4.50
   3  10   4   54.09    4.80
   3  10   4   49.80    2.70
  -4 -10  -4   21.80    3.20
   4  10   4   17.40    3.10
  -5 -10  -4   93.59    6.50
   5  10   4  108.59    6.70
  -6 -10  -4  471.65   14.50
   6  10   4  494.75   15.70
  -7 -10  -4    0.00    3.00
   7  10   4   -1.10    3.40
  10 -11  -4   -7.90    3.90
 -10  11   4   -3.40    3.00
   9 -11  -4    3.80    3.80
  -9  11   4   -1.30    2.90
   8 -11  -4   98.59    7.40
  -8  11   4   99.29    6.40
   7 -11  -4   51.79    4.80
  -7  11   4   48.00    3.90
   6 -11  -4  118.39    6.90
  -6  11   4  106.39    6.10
   5 -11  -4    4.70    2.20
   5 -11  -4    0.40    2.70
  -5  11   4   -0.50    2.40
   4 -11  -4   59.79    4.90
  -4  11   4   58.99    5.00
   3 -11  -4  203.28    7.60
  -3  11   4  207.18    7.70
   2 -11  -4    6.50    2.10
  -2  11   4    7.80    1.40
  -2  11   4    9.30    2.60
   1 -11  -4  354.96   10.70
   1 -11  -4  370.46   11.00
  -1  11   4  366.96   11.00
  -1  11   4  360.96   10.10
   0 -11  -4   26.50    2.60
   0 -11  -4   17.10    2.80
   0  11   4   22.70    2.30
   0  11   4   20.80    2.90
  -1 -11  -4  312.57    9.40
  -1 -11  -4  332.07    9.60
  -1 -11  -4  315.77   10.20
   1  11   4  318.27    9.90
   1  11   4  324.47   10.20
  -2 -11  -4   62.19    4.00
  -2 -11  -4   75.59    5.40
  -2 -11  -4   64.09    3.10
   2  11   4   68.59    4.90
   2  11   4   66.29    5.00
  -3 -11  -4    9.60    2.80
   3  11   4   11.40    2.80
   3  11   4    7.80    2.50
  -4 -11  -4   90.29    6.30
   4  11   4  106.19    6.40
  -5 -11  -4  315.47   11.00
   5  11   4  311.97   11.40
  -6 -11  -4    2.50    3.20
   6  11   4    4.10    3.30
   9 -12  -4   42.10    5.30
  -9  12   4   54.99    4.60
   8 -12  -4   67.19    7.00
  -8  12   4   71.09    6.30
   7 -12  -4  107.89    7.30
  -7  12   4   97.49    6.60
   6 -12  -4   15.60    3.50
  -6  12   4   13.50    3.10
   5 -12  -4    2.90    2.80
   5 -12  -4    3.60    2.40
  -5  12   4    0.50    2.60
   4 -12  -4  172.08    7.50
  -4  12   4  181.88    7.50
   3 -12  -4   16.50    2.70
  -3  12   4   14.60    3.00
   2 -12  -4  282.47    9.30
  -2  12   4  291.07    8.10
  -2  12   4  291.87    9.80
   1 -12  -4    0.70    1.90
   1 -12  -4   -0.50    2.50
  -1  12   4   -1.30    2.40
  -1  12   4   -0.40    1.60
   0 -12  -4  185.18    7.70
   0 -12  -4  185.18    6.70
   0  12   4  176.78    6.50
   0  12   4  180.08    7.70
  -1 -12  -4   68.09    4.20
  -1 -12  -4   74.89    5.80
   1  12   4   72.39    5.60
   1  12   4   60.69    4.70
  -2 -12  -4  121.89    6.80
   2  12   4  124.99    6.20
   2  12   4  125.09    6.50
  -3 -12  -4  152.18    7.50
   3  12   4  153.98    7.20
  -4 -12  -4  124.89    7.40
   4  12   4  125.79    7.20
  -5 -12  -4   22.80    4.00
   5  12   4   18.80    3.80
  -6 -12  -4  178.68    9.00
   6  12   4  163.98    9.20
   9 -13  -4   42.10    5.40
  -9  13   4   51.29    4.70
   8 -13  -4  147.39    8.80
  -8  13   4  165.78    8.20
   7 -13  -4   81.49    7.10
  -7  13   4   75.39    6.50
   6 -13  -4   12.60    3.50
  -6  13   4    9.70    3.10
   5 -13  -4   26.20    3.70
   5 -13  -4   23.70    3.20
  -5  13   4   26.90    3.70
   4 -13  -4   55.69    5.20
   4 -13  -4   50.29    4.20
  -4  13   4   50.09    4.20
   3 -13  -4  210.88    8.40
   3 -13  -4  207.38    8.00
  -3  13   4  212.48    8.60
   2 -13  -4   59.89    4.50
   2 -13  -4   66.09    6.00
  -2  13   4   55.59    4.40
  -2  13   4   62.29    3.40
   1 -13  -4  510.85   14.90
   1 -13  -4  554.24   15.40
  -1  13   4  549.05   15.40
  -1  13   4  516.35   14.40
   0 -13  -4  128.19    5.80
   0 -13  -4  123.49    7.10
   0  13   4  121.79    5.60
   0  13   4  128.99    7.10
  -1 -13  -4  269.27   10.00
   1  13   4  259.77    9.10
   1  13   4  290.37   10.00
  -2 -13  -4  175.28    8.20
   2  13   4  172.68    7.40
   2  13   4  175.88    7.90
  -3 -13  -4   53.39    4.80
   3  13   4   54.89    4.50
  -4 -13  -4   27.80    4.20
   4  13   4   28.20    4.00
  -5 -13  -4  130.79    8.40
   5  13   4  138.69    8.10
   8 -14  -4  117.59    8.60
  -8  14   4  128.79    8.00
   7 -14  -4    9.90    3.90
  -7  14   4   11.60    3.70
   6 -14  -4   46.50    4.70
  -6  14   4   46.90    4.40
   5 -14  -4   12.80    3.40
  -5  14   4    9.60    3.40
   4 -14  -4  162.58    7.50
   4 -14  -4  170.98    8.10
  -4  14   4  165.88    8.10
   3 -14  -4    5.50    2.70
   3 -14  -4    3.00    3.10
  -3  14   4    4.00    3.10
   2 -14  -4  450.45   13.60
   2 -14  -4  481.55   14.20
  -2  14   4  463.55   14.20
  -2  14   4  449.86   12.40
   1 -14  -4   18.70    3.60
   1 -14  -4   16.90    2.70
  -1  14   4   13.80    2.40
  -1  14   4   15.80    3.40
   0 -14  -4  219.88    9.30
   0  14   4  241.18    9.60
   0  14   4  204.28    7.70
  -1 -14  -4   49.00    4.50
   1  14   4   47.20    4.50
   1  14   4   49.90    4.80
  -2 -14  -4   10.60    3.60
   2  14   4   10.20    3.00
  -3 -14  -4   25.90    4.20
   3  14   4   23.80    3.70
  -4 -14  -4   93.79    8.10
   4  14   4   94.39    7.00
   7 -15  -4   20.20    4.40
  -7  15   4   18.50    4.20
   6 -15  -4   97.49    7.30
  -6  15   4  103.39    7.70
   5 -15  -4  133.59    7.50
  -5  15   4  144.59    8.30
   4 -15  -4    9.10    3.20
   4 -15  -4    6.80    3.30
  -4  15   4   10.40    3.60
   3 -15  -4  408.46   13.00
   3 -15  -4  378.96   12.50
  -3  15   4  400.06   13.10
   2 -15  -4   21.70    3.00
   2 -15  -4   23.40    3.90
  -2  15   4   25.30    4.00
   1 -15  -4   57.39    5.20
  -1  15   4   75.59    7.10
  -1  15   4   73.89    4.70
   0 -15  -4   28.20    4.20
   0  15   4   36.50    3.40
   0  15   4   40.40    4.50
  -1 -15  -4   50.29    4.90
   1  15   4   51.49    5.00
   1  15   4   53.89    4.90
  -2 -15  -4   24.20    4.40
   2  15   4   22.30    3.50
  -3 -15  -4  104.09    8.50
   3  15   4   98.89    6.80
   6 -16  -4   57.19    5.40
  -6  16   4   54.29    5.50
   5 -16  -4   22.10    4.00
  -5  16   4   21.60    4.30
   4 -16  -4  213.38    9.70
   4 -16  -4  211.68    9.00
  -4  16   4  212.88    9.90
   3 -16  -4    5.70    3.00
   3 -16  -4    3.90    3.60
  -3  16   4    8.90    4.00
   2 -16  -4   18.20    4.10
  -2  16   4   16.10    4.00
   1 -16  -4   13.00    3.90
  -1  16   4   12.80    3.90
   0 -16  -4   -4.90    3.70
   0  16   4   -5.30    3.40
  -1 -16  -4    2.80    3.90
   1  16   4    5.70    2.70
  -2 -16  -4   59.19    5.80
   2  16   4   63.59    5.80
  -4  17   4    6.30    4.30
   3 -17  -4   19.30    4.40
  -3  17   4   21.80    4.60
   2 -17  -4   -3.20    3.80
  -2  17   4   -6.00    3.80
   1 -17  -4    3.40    4.10
  -1  17   4    1.50    3.90
   0 -17  -4    3.90    4.10
   0  17   4    0.60    4.00
   1  21  -5   62.89    5.30
  -1 -21   5   56.29    5.40
   0  21  -5  148.19    8.30
   0 -21   5  159.18    9.40
  -1  21  -5  308.27   11.50
  -1  21  -5  322.47   12.10
   1 -21   5  327.37   12.50
  -2  21  -5   -0.50    3.70
   2 -21   5   -2.80    3.70
  -3  21  -5  157.28    9.60
   3 -21   5  160.58    9.40
   3  20  -5   42.00    4.50
  -3 -20   5   36.10    5.00
   2  20  -5   50.29    4.60
  -2 -20   5   51.29    5.30
   1  20  -5  132.09    7.40
  -1 -20   5  122.29    8.40
   0  20  -5  218.18    9.30
   0  20  -5  226.68    9.70
   0 -20   5  221.08   10.10
  -1  20  -5   -2.30    3.20
  -1  20  -5   -0.50    3.10
   1 -20   5   -4.80    3.60
  -2  20  -5  146.39    8.00
  -2  20  -5  146.99    8.80
   2 -20   5  158.98    9.00
  -3  20  -5   -6.30    3.40
   3 -20   5    0.80    3.80
  -4  20  -5    3.40    4.00
   4 -20   5    1.30    3.80
  -5  20  -5   22.20    4.60
   4  19  -5   62.59    5.00
  -4 -19   5   65.29    5.40
   3  19  -5   86.69    6.30
  -3 -19   5   65.69    5.50
   2  19  -5   71.99    6.00
  -2 -19   5   61.09    5.20
   1  19  -5  142.59    7.60
   1  19  -5  155.78    7.50
  -1 -19   5  141.29    8.30
   0  19  -5    1.10    3.10
   0  19  -5    4.30    3.00
   0 -19   5    3.10    3.40
  -1  19  -5  344.67   11.80
  -1  19  -5  317.37   11.30
   1 -19   5  351.46   12.10
  -2  19  -5   -4.70    3.10
  -2  19  -5   -1.30    2.80
   2 -19   5   -1.10    3.50
  -3  19  -5   11.20    3.80
   3 -19   5   17.20    4.00
  -4  19  -5    9.20    3.90
   4 -19   5    6.00    3.80
  -5  19  -5    2.80    3.80
  -6  19  -5   98.29    8.30
   5  18  -5   75.69    6.10
  -5 -18   5   75.79    6.90
   4  18  -5   28.20    3.60
  -4 -18   5   23.40    4.00
   3  18  -5   81.19    5.90
  -3 -18   5   82.89    6.70
   2  18  -5   14.70    3.10
  -2 -18   5   19.70    3.70
   1  18  -5   11.60    3.10
   1  18  -5    6.10    3.00
  -1 -18   5    9.20    3.50
   0  18  -5  170.58    7.80
   0  18  -5  196.08    8.30
   0 -18   5  177.78    8.60
  -1  18  -5   44.20    4.10
  -1  18  -5   43.40    4.30
   1 -18   5   43.00    4.60
   1 -18   5   48.20    3.80
  -2  18  -5    5.40    3.20
  -2  18  -5    6.50    2.90
   2 -18   5    2.60    3.30
  -3  18  -5    5.50    3.40
   3 -18   5    5.70    3.40
  -4  18  -5   38.00    4.30
   4 -18   5   37.40    4.40
  -5  18  -5  134.59    8.20
   5 -18   5  135.19    8.20
  -6  18  -5   67.59    5.50
  -7  18  -5   25.90    4.80
   6  17  -5   52.29    5.10
   6  17  -5   61.89    4.70
  -6 -17   5   53.89    4.60
   5  17  -5   26.30    3.50
  -5 -17   5   19.80    3.60
   4  17  -5   38.80    3.80
  -4 -17   5   32.10    4.00
   3  17  -5    2.80    2.50
  -3 -17   5    1.10    2.90
   2  17  -5   43.50    3.80
   2  17  -5   44.90    3.80
  -2 -17   5   41.40    4.20
   1  17  -5  126.99    6.60
   1  17  -5  130.79    6.40
  -1 -17   5  124.39    7.20
   0  17  -5   85.19    5.70
   0  17  -5   89.49    6.10
   0 -17   5   75.79    6.40
   0 -17   5   89.89    3.80
  -1  17  -5    1.50    2.50
  -1  17  -5   -1.40    2.80
   1 -17   5   -0.90    2.90
  -2  17  -5   21.00    3.50
  -2  17  -5   21.90    3.40
   2 -17   5   21.10    3.70
   2 -17   5   23.20    2.60
  -3  17  -5   79.59    5.80
  -3  17  -5   71.99    6.20
   3 -17   5   81.49    6.40
  -4  17  -5  328.67   11.40
   4 -17   5  330.37   11.30
  -5  17  -5   32.50    4.20
   5 -17   5   27.90    4.00
  -6  17  -5  210.28    9.40
  -7  17  -5   48.10    4.90
  -8  17  -5   10.60    4.30
   7  16  -5   18.90    3.30
   7  16  -5   14.40    4.10
  -7 -16   5   12.60    3.20
   6  16  -5   32.20    3.60
  -6 -16   5   26.80    3.60
   5  16  -5   19.10    3.10
  -5 -16   5   13.80    3.30
   4  16  -5    1.90    2.40
  -4 -16   5   -2.00    2.60
   3  16  -5   26.40    3.20
  -3 -16   5   19.10    3.30
   2  16  -5   48.10    3.60
   2  16  -5   51.99    4.00
  -2 -16   5   43.10    4.00
   1  16  -5  206.18    7.70
   1  16  -5  213.38    7.90
  -1 -16   5  217.48    8.40
   0  16  -5   17.70    3.00
   0  16  -5   18.00    2.90
   0 -16   5   15.40    3.10
   0 -16   5   11.20    1.60
  -1  16  -5    9.40    2.80
  -1  16  -5    9.20    2.70
   1 -16   5    3.40    2.80
   1 -16   5    8.40    1.80
  -2  16  -5   26.50    3.20
  -2  16  -5   21.90    3.30
   2 -16   5   27.10    2.60
   2 -16   5   23.30    3.40
  -3  16  -5   46.40    3.90
  -3  16  -5   47.00    3.60
  -3  16  -5   41.00    3.90
   3 -16   5   44.20    4.10
  -4  16  -5   53.39    4.00
  -4  16  -5   42.50    4.10
   4 -16   5   52.39    4.30
  -5  16  -5  229.38    9.50
   5 -16   5  257.37    9.40
  -6  16  -5  181.98    8.60
  -7  16  -5   54.39    5.00
  -8  16  -5   61.79    5.50
   7  15  -5   23.80    3.40
   7  15  -5   23.60    4.30
  -7 -15   5   21.10    3.20
   6  15  -5   65.29    5.20
  -6 -15   5   49.90    4.10
   5  15  -5   50.29    4.00
  -5 -15   5   46.70    3.90
   4  15  -5  211.38    7.90
  -4 -15   5  218.58    8.10
   3  15  -5    1.10    2.10
   3  15  -5    2.70    2.20
  -3 -15   5   -1.00    2.60
   2  15  -5  404.56   11.90
   2  15  -5  409.26   11.70
  -2 -15   5  420.96   12.20
   1  15  -5   24.80    2.90
   1  15  -5   27.20    3.00
  -1 -15   5   21.20    2.90
   0  15  -5   13.00    2.60
   0  15  -5    9.20    2.40
   0 -15   5    7.10    1.40
   0 -15   5    9.40    2.70
  -1  15  -5   47.50    3.70
  -1  15  -5   48.70    4.40
  -1  15  -5   53.39    3.70
   1 -15   5   41.40    3.60
   1 -15   5   47.80    3.30
  -2  15  -5    4.10    2.30
  -2  15  -5   -0.40    2.40
  -2  15  -5    2.30    1.60
   2 -15   5    4.50    1.80
   2 -15   5    3.80    2.60
  -3  15  -5   40.60    3.50
  -3  15  -5   41.10    3.40
  -3  15  -5   37.30    3.70
   3 -15   5   32.50    3.40
  -4  15  -5   76.39    6.00
  -4  15  -5   96.29    4.70
   4 -15   5   89.09    5.90
  -5  15  -5  131.39    7.10
  -5  15  -5  130.09    5.80
   5 -15   5  135.89    6.80
  -6  15  -5   15.60    3.40
  -7  15  -5   72.59    6.60
   7 -15   5   80.39    5.20
  -8  15  -5   58.39    5.20
  -9  15  -5   75.09    5.80
   8  14  -5    4.50    3.50
   8  14  -5    7.90    2.80
   7  14  -5    4.70    2.50
   7  14  -5    2.70    3.20
  -7 -14   5    6.30    2.50
   6  14  -5   35.50    3.50
  -6 -14   5   41.50    3.60
   5  14  -5   26.30    3.10
  -5 -14   5   26.30    3.10
   4  14  -5   25.30    3.00
  -4 -14   5   22.00    3.00
   3  14  -5  320.57    9.30
   3  14  -5  316.07    9.70
  -3 -14   5  299.67    9.70
   2  14  -5   92.19    4.90
   2  14  -5   97.09    4.80
  -2 -14   5   89.79    5.20
   1  14  -5    4.30    2.10
   1  14  -5    5.20    2.10
  -1 -14   5   -0.50    2.10
   0  14  -5  177.28    6.50
   0  14  -5  182.18    6.40
   0  14  -5  167.78    6.40
   0 -14   5  169.08    6.70
   0 -14   5  142.19    5.20
  -1  14  -5   10.00    2.40
  -1  14  -5    6.70    1.80
  -1  14  -5    6.00    2.10
   1 -14   5   10.50    2.60
   1 -14   5    7.30    1.60
  -2  14  -5  279.97    9.00
  -2  14  -5  280.97    9.20
  -2  14  -5  296.47    8.80
   2 -14   5  280.37    9.20
   2 -14   5  277.97    8.80
  -3  14  -5    1.20    2.10
  -3  14  -5    2.10    1.50
  -3  14  -5   -1.10    2.20
   3 -14   5   -1.40    2.30
  -4  14  -5  680.43   18.50
  -4  14  -5  667.83   18.20
   4 -14   5  700.13   18.20
  -5  14  -5   48.60    3.80
  -5  14  -5   42.70    4.00
   5 -14   5   38.80    3.60
  -6  14  -5   55.19    4.40
  -6  14  -5   61.19    4.10
   6 -14   5   62.69    4.50
   6 -14   5   60.59    5.40
  -7  14  -5  329.27   11.20
   7 -14   5  322.47   10.40
  -8  14  -5  147.79    8.00
   8 -14   5  151.78    6.80
  -9  14  -5    9.70    3.70
   8  13  -5   -3.70    3.10
   8  13  -5    1.90    2.50
   7  13  -5   70.99    6.50
   7  13  -5   83.89    5.20
  -7 -13   5   71.39    4.80
   6  13  -5    7.30    2.40
  -6 -13   5    3.90    2.30
   5  13  -5   17.80    2.70
  -5 -13   5   17.60    2.60
   4  13  -5  255.77    8.40
   4  13  -5  264.07    7.80
  -4 -13   5  263.47    8.40
   3  13  -5    1.00    1.60
   3  13  -5    1.50    2.00
  -3 -13   5    0.00    1.90
   2  13  -5   19.60    2.50
   2  13  -5   11.80    2.00
  -2 -13   5    8.20    2.20
   1  13  -5   19.40    2.30
   1  13  -5   22.90    2.40
  -1 -13   5   17.20    2.30
  -1 -13   5   25.60    2.20
   0  13  -5  151.08    5.80
   0  13  -5  149.88    5.80
   0  13  -5  156.98    5.70
   0 -13   5  142.09    6.00
   0 -13   5  143.99    4.90
  -1  13  -5  293.67    9.00
  -1  13  -5  287.27    8.80
  -1  13  -5  286.87    8.70
   1 -13   5  284.17    9.00
   1 -13   5  288.57    8.60
  -2  13  -5   59.09    4.50
  -2  13  -5   64.29    3.50
  -2  13  -5   63.69    4.30
   2 -13   5   62.89    4.60
  -3  13  -5  676.93   17.70
  -3  13  -5  652.83   17.40
  -3  13  -5  692.43   18.00
   3 -13   5  659.83   17.50
  -4  13  -5   60.59    3.80
  -4  13  -5   57.19    4.90
   4 -13   5   53.69    4.70
  -5  13  -5  264.77    8.80
  -5  13  -5  270.07    9.30
   5 -13   5  277.07    9.00
   5 -13   5  276.27    8.70
  -6  13  -5  160.68    7.20
  -6  13  -5  157.78    6.20
   6 -13   5  152.58    6.30
   6 -13   5  152.38    6.60
  -7  13  -5  157.18    7.40
   7 -13   5  156.08    6.60
  -8  13  -5   16.30    3.50
   8 -13   5   22.10    3.10
  -9  13  -5  201.78    9.10
   9 -13   5  200.48    8.40
   9  12  -5   -1.40    3.30
   9  12  -5    0.70    2.40
  -9 -12   5   -1.20    2.30
   8  12  -5   57.49    4.80
   8  12  -5   53.09    5.10
  -8 -12   5   48.10    4.00
   7  12  -5    0.00    2.60
   7  12  -5    2.00    2.20
  -7 -12   5   -0.30    2.00
   6  12  -5   66.19    4.60
  -6 -12   5   62.79    4.50
   5  12  -5  239.78    8.00
  -5 -12   5  242.48    7.80
   4  12  -5  354.56   10.40
   4  12  -5  362.46    9.80
  -4 -12   5  356.76   10.30
  -4 -12   5  368.56   10.20
   3  12  -5    9.10    2.10
   3  12  -5    5.90    1.60
  -3 -12   5    4.90    1.90
   2  12  -5    6.50    1.70
   2  12  -5    9.10    2.00
  -2 -12   5    7.40    1.90
   1  12  -5  621.24   15.80
   1  12  -5  623.04   15.90
  -1 -12   5  613.54   16.20
  -1 -12   5  608.34   15.90
   0  12  -5  265.97    8.20
   0  12  -5  271.77    8.40
   0  12  -5  271.77    8.30
   0 -12   5  281.77    7.90
   0 -12   5  277.37    8.50
  -1  12  -5    7.60    1.90
  -1  12  -5    7.50    1.90
  -1  12  -5    9.60    1.60
   1 -12   5    6.10    2.10
   1 -12   5    8.50    1.50
  -2  12  -5 1670.43   39.90
  -2  12  -5 1682.53   40.00
  -2  12  -5 1689.43   41.90
   2 -12   5 1661.83   39.90
  -3  12  -5  145.29    5.90
  -3  12  -5  140.69    5.20
  -3  12  -5  145.99    5.80
   3 -12   5  146.49    5.90
  -4  12  -5  183.88    6.40
  -4  12  -5  171.68    6.70
   4 -12   5  167.68    6.10
   4 -12   5  181.28    6.70
  -5  12  -5  166.68    6.40
  -5  12  -5  176.08    7.00
   5 -12   5  171.38    6.60
   5 -12   5  175.28    6.40
  -6  12  -5   71.79    4.30
  -6  12  -5   71.79    5.40
   6 -12   5   75.39    4.90
   6 -12   5   75.99    4.50
  -7  12  -5   11.70    3.00
   7 -12   5   18.90    2.80
  -8  12  -5  323.37   10.90
   8 -12   5  334.37   11.00
  -9  12  -5    4.40    3.30
   9 -12   5    1.80    2.80
   9  11  -5   24.30    3.20
   9  11  -5   19.20    3.70
  -9 -11   5   26.60    2.80
   8  11  -5    5.40    3.10
   8  11  -5    4.20    2.30
  -8 -11   5    0.40    1.90
   7  11  -5    0.60    2.00
  -7 -11   5   -1.20    1.80
   6  11  -5   69.09    4.50
  -6 -11   5   67.39    4.20
   5  11  -5  631.74   15.60
   5  11  -5  628.64   16.40
  -5 -11   5  646.74   16.10
  -5 -11   5  615.24   16.00
   4  11  -5    2.80    1.40
   4  11  -5    4.90    1.80
  -4 -11   5    5.30    1.80
  -4 -11   5    4.60    1.70
   3  11  -5  124.89    5.10
   3  11  -5  129.89    4.60
  -3 -11   5  134.79    5.20
  -3 -11   5  141.29    4.90
  -3 -11   5  125.29    5.00
   2  11  -5    9.10    1.60
   2  11  -5    8.70    1.90
  -2 -11   5    8.50    1.80
  -2 -11   5    9.90    1.90
   1  11  -5  406.86   11.00
   1  11  -5  402.36   10.80
  -1 -11   5  394.66   10.90
  -1 -11   5  390.76   11.00
  -1 -11   5  429.06   11.10
   0  11  -5   53.29    3.50
   0  11  -5   47.90    3.40
   0  11  -5   46.40    3.00
   0 -11   5   55.69    2.70
   0 -11   5   46.50    3.40
   0 -11   5   49.70    3.70
  -1  11  -5 2849.61   65.99
  -1  11  -5 2779.72   65.79
  -1  11  -5 2831.22   69.69
   1 -11   5 2827.02   65.99
   1 -11   5 2894.41   71.39
  -2  11  -5  228.68    7.00
  -2  11  -5  223.28    7.10
  -2  11  -5  224.18    7.30
   2 -11   5  231.68    7.10
   2 -11   5  217.08    7.20
  -3  11  -5  664.63   17.30
  -3  11  -5  657.83   16.60
  -3  11  -5  656.63   16.80
   3 -11   5  643.64   16.70
   3 -11   5  620.94   17.10
  -4  11  -5   82.49    4.70
  -4  11  -5   80.99    4.10
   4 -11   5   76.19    4.00
   4 -11   5   72.99    4.40
  -5  11  -5   73.69    4.90
  -5  11  -5   73.19    4.10
   5 -11   5   72.79    4.10
   5 -11   5   71.79    4.50
  -6  11  -5    4.10    2.60
  -6  11  -5    6.30    2.00
   6 -11   5    8.60    2.30
   6 -11   5    7.50    2.20
  -7  11  -5  202.78    7.90
   7 -11   5  209.08    7.90
  -8  11  -5   37.00    3.80
   8 -11   5   33.30    3.60
  -9  11  -5   44.50    4.20
   9 -11   5   47.80    4.40
 -10  11  -5   -2.40    3.10
  10 -11   5   -1.90    3.10
  10  10  -5    2.40    3.50
 -10 -10   5    3.60    2.10
   9  10  -5    0.40    3.00
   9  10  -5    2.40    2.40
  -9 -10   5    0.30    1.90
   8  10  -5    0.20    2.70
   8  10  -5    4.40    2.20
   8  10  -5    2.40    1.70
  -8 -10   5    1.30    1.70
   7  10  -5    7.60    1.60
   7  10  -5    7.90    2.20
  -7 -10   5    6.90    1.90
   6  10  -5  583.14   15.40
   6  10  -5  579.64   15.40
  -6 -10   5  583.54   14.80
  -6 -10   5  592.24   14.80
   5  10  -5   -1.80    1.10
   5  10  -5   -0.10    1.70
  -5 -10   5   -0.40    1.30
  -5 -10   5    0.30    1.70
   4  10  -5  433.86   11.00
   4  10  -5  425.56   11.70
  -4 -10   5  448.16   11.80
  -4 -10   5  450.35   11.40
  -4 -10   5  406.46   11.30
   3  10  -5  340.47    9.10
   3  10  -5  328.27    9.50
  -3 -10   5  361.96    9.40
  -3 -10   5  350.36    9.70
  -3 -10   5  339.17    9.40
   2  10  -5  154.28    5.10
   2  10  -5  158.28    5.50
  -2 -10   5  154.68    5.40
  -2 -10   5  151.18    5.40
  -2 -10   5  167.88    5.30
   1  10  -5   11.90    1.80
   1  10  -5    9.00    1.60
  -1 -10   5   13.10    1.80
  -1 -10   5    7.30    1.70
  -1 -10   5   15.50    1.50
   0  10  -5 3849.01   89.99
   0  10  -5 3880.01   95.49
   0  10  -5 3866.31   90.09
   0 -10   5 3988.00   97.69
   0 -10   5 3861.31   90.09
   0 -10   5 4028.50   90.09
  -1  10  -5   51.39    3.30
  -1  10  -5   55.89    2.90
  -1  10  -5   47.60    3.40
   1 -10   5   51.59    3.60
   1 -10   5   58.49    3.20
  -2  10  -5  596.04   15.40
  -2  10  -5  579.94   14.90
  -2  10  -5  575.64   14.80
   2 -10   5  589.44   14.90
   2 -10   5  568.54   14.90
  -3  10  -5  201.08    6.50
  -3  10  -5  211.18    6.50
  -3  10  -5  202.68    6.60
   3 -10   5  190.38    6.40
   3 -10   5  195.98    6.30
   3 -10   5  191.28    6.50
  -4  10  -5   14.10    2.00
  -4  10  -5   14.20    2.30
   4 -10   5   16.20    2.10
   4 -10   5   14.50    2.10
   4 -10   5   16.40    2.00
  -5  10  -5   84.69    4.70
  -5  10  -5   79.99    4.20
   5 -10   5   80.29    4.50
   5 -10   5   85.29    4.40
  -6  10  -5   41.50    3.40
  -6  10  -5   54.89    3.80
   6 -10   5   50.59    4.00
   6 -10   5   52.19    4.20
  -7  10  -5  133.49    6.30
   7 -10   5  140.39    6.50
  -8  10  -5   32.70    3.50
   8 -10   5   34.00    3.70
  -9  10  -5   -3.40    2.90
   9 -10   5   -1.80    2.70
 -10  10  -5   16.10    3.60
  10 -10   5   16.70    3.70
  10   9  -5   36.80    3.50
  10   9  -5   33.40    4.40
 -10  -9   5   46.00    3.70
   9   9  -5   11.00    3.30
   9   9  -5   14.60    2.70
  -9  -9   5   14.00    2.00
   8   9  -5    0.80    2.00
   8   9  -5   -2.40    1.60
   8   9  -5    0.20    2.60
   7   9  -5  476.25   13.10
   7   9  -5  480.15   13.00
  -7  -9   5  473.65   12.10
  -7  -9   5  468.25   12.10
   6   9  -5    9.20    2.00
   6   9  -5   11.90    1.60
  -6  -9   5    8.10    1.80
  -6  -9   5   10.80    1.60
   5   9  -5  478.65   13.00
   5   9  -5  486.45   13.00
  -5  -9   5  507.55   13.10
  -5  -9   5  470.75   12.40
  -5  -9   5  503.05   12.40
   4   9  -5  492.55   13.00
   4   9  -5  504.55   12.30
   4   9  -5  475.95   13.10
  -4  -9   5  523.35   13.20
  -4  -9   5  487.75   12.60
  -4  -9   5  520.65   12.70
   3   9  -5  160.18    4.60
   3   9  -5  163.58    4.90
   3   9  -5  153.28    5.40
  -3  -9   5  164.98    5.50
  -3  -9   5  165.68    5.10
  -3  -9   5  152.18    5.20
   2   9  -5    6.40    1.50
   2   9  -5    9.60    0.90
   2   9  -5    7.20    1.30
  -2  -9   5    6.80    0.90
  -2  -9   5    6.00    1.30
  -2  -9   5    4.70    1.50
  -2  -9   5    7.00    1.50
   1   9  -5 2017.80   47.20
   1   9  -5 2046.70   47.10
  -1  -9   5 1964.40   47.10
  -1  -9   5 2030.20   50.99
  -1  -9   5 2052.59   47.20
   0   9  -5   19.70    1.80
   0   9  -5   24.40    2.10
   0   9  -5   19.70    1.80
   0  -9   5   17.20    1.90
   0  -9   5   18.40    1.90
  -1   9  -5 1609.94   38.00
  -1   9  -5 1629.34   40.20
  -1   9  -5 1616.04   38.10
   1  -9   5 1606.64   38.10
   1  -9   5 1634.44   38.10
  -2   9  -5  127.89    4.50
  -2   9  -5  121.69    4.50
  -2   9  -5  123.89    4.70
   2  -9   5  118.19    4.50
   2  -9   5  127.99    4.50
   2  -9   5  122.09    4.60
   2  -9   5  125.89    4.70
  -3   9  -5   52.69    3.20
  -3   9  -5   57.49    3.10
  -3   9  -5   47.10    3.50
   3  -9   5   41.80    3.40
   3  -9   5   55.09    3.10
   3  -9   5   50.49    3.10
  -4   9  -5   99.69    4.60
  -4   9  -5   97.99    4.40
   4  -9   5  100.69    4.40
   4  -9   5  100.79    4.20
   4  -9   5   96.39    4.40
  -5   9  -5  117.79    5.10
  -5   9  -5  120.79    4.90
   5  -9   5  110.89    5.00
   5  -9   5  115.19    4.80
   5  -9   5  109.89    4.60
  -6   9  -5  174.08    6.40
  -6   9  -5  166.88    6.40
   6  -9   5  172.68    6.10
   6  -9   5  166.28    6.70
  -7   9  -5   27.90    3.00
   7  -9   5   36.00    3.40
  -8   9  -5   -1.40    2.40
   8  -9   5    0.30    2.50
  -9   9  -5   35.10    3.60
   9  -9   5   25.50    3.80
 -10   9  -5    2.90    3.10
  10  -9   5    4.80    3.20
  10   8  -5    1.90    3.10
  10   8  -5    0.10    2.30
   9   8  -5   47.70    4.10
   9   8  -5   49.90    3.90
   9   8  -5   47.70    4.40
  -9  -8   5   57.59    3.30
   8   8  -5  140.19    5.90
   8   8  -5  139.99    5.60
   8   8  -5  139.79    7.00
  -8  -8   5  143.09    4.70
   7   8  -5    1.00    1.80
   7   8  -5    1.00    1.50
  -7  -8   5    0.10    1.30
  -7  -8   5   -1.20    1.40
   6   8  -5  491.45   13.60
   6   8  -5  502.25   13.40
  -6  -8   5  500.65   12.50
  -6  -8   5  504.75   12.50
  -6  -8   5  513.35   13.60
   5   8  -5  392.96   10.60
   5   8  -5  382.26   10.60
  -5  -8   5  406.66   10.00
  -5  -8   5  375.96    9.90
  -5  -8   5  387.16   10.70
   4   8  -5  123.59    4.80
   4   8  -5  131.59    3.90
   4   8  -5  127.29    4.20
  -4  -8   5  135.49    4.40
  -4  -8   5  141.29    4.30
  -4  -8   5  134.19    4.80
   3   8  -5  273.07    7.80
   3   8  -5  280.47    7.30
   3   8  -5  262.37    7.70
  -3  -8   5  284.27    7.50
  -3  -8   5  280.97    7.60
  -3  -8   5  280.17    7.50
  -3  -8   5  286.27    7.90
   2   8  -5  958.40   24.20
   2   8  -5  918.41   22.90
   2   8  -5  952.80   22.60
  -2  -8   5  950.50   23.00
  -2  -8   5  937.71   22.70
  -2  -8   5  957.00   24.20
  -2  -8   5 1005.10   22.80
   1   8  -5  150.98    5.00
   1   8  -5  154.18    4.60
   1   8  -5  155.58    4.80
  -1  -8   5  157.48    5.00
  -1  -8   5  146.49    4.90
  -1  -8   5  156.28    4.90
   0   8  -5  143.49    4.70
   0   8  -5  145.89    4.70
   0   8  -5  143.29    4.80
   0  -8   5  146.69    4.60
   0  -8   5  137.59    4.70
  -1   8  -5   26.00    2.40
  -1   8  -5   17.70    1.80
  -1   8  -5   25.90    2.10
   1  -8   5   20.80    1.80
  -2   8  -5  277.67    7.80
  -2   8  -5  266.17    7.60
  -2   8  -5  291.07    8.10
   2  -8   5  268.57    7.80
   2  -8   5  275.57    7.60
   2  -8   5  276.37    8.00
   2  -8   5  273.97    8.20
  -3   8  -5   18.60    2.00
  -3   8  -5   17.30    1.80
  -3   8  -5   19.90    2.00
   3  -8   5   19.90    1.80
   3  -8   5   20.10    1.90
   3  -8   5   19.40    2.00
  -4   8  -5  153.48    5.30
  -4   8  -5  150.78    5.60
   4  -8   5  143.19    5.00
   4  -8   5  153.48    5.30
   4  -8   5  148.19    5.50
  -5   8  -5  541.45   14.20
  -5   8  -5  572.84   14.30
  -5   8  -5  547.05   15.10
   5  -8   5  519.35   15.20
   5  -8   5  554.34   14.00
   5  -8   5  539.85   13.90
  -6   8  -5  162.98    6.20
  -6   8  -5  160.98    5.70
  -6   8  -5  144.39    5.90
   6  -8   5  160.98    5.60
   6  -8   5  152.98    5.50
   6  -8   5  151.28    6.40
  -7   8  -5  266.17    8.50
   7  -8   5  265.67    9.40
  -8   8  -5   20.00    2.80
   8  -8   5   19.40    3.20
  -9   8  -5   -1.00    2.60
   9  -8   5    2.00    2.90
 -10   8  -5   15.10    3.20
  10  -8   5   11.30    3.60
  10   7  -5   21.10    3.00
  10   7  -5   19.60    3.00
  10   7  -5   19.20    3.90
   9   7  -5  274.77    9.00
   9   7  -5  288.17   10.40
   9   7  -5  268.57    9.20
   8   7  -5   16.80    3.10
   8   7  -5   17.20    2.30
   8   7  -5   18.10    2.60
  -8  -7   5   14.10    1.60
   7   7  -5  125.49    5.20
   7   7  -5  134.49    5.40
  -7  -7   5  141.59    4.30
  -7  -7   5  131.59    4.30
   6   7  -5  423.46   11.40
   6   7  -5  409.66   11.70
  -6  -7   5  423.96   10.40
  -6  -7   5  415.76   10.40
   5   7  -5  464.45   12.50
   5   7  -5  467.75   12.80
  -5  -7   5  477.45   11.80
  -5  -7   5  473.95   12.60
  -5  -7   5  494.25   11.70
   4   7  -5  645.24   16.30
   4   7  -5  640.14   17.10
   4   7  -5  664.23   15.50
  -4  -7   5  659.03   16.40
  -4  -7   5  670.63   15.80
  -4  -7   5  657.73   15.80
   3   7  -5  509.15   13.10
   3   7  -5  519.45   13.70
   3   7  -5  525.15   12.60
  -3  -7   5  526.55   12.70
  -3  -7   5  517.85   13.50
  -3  -7   5  523.25   13.20
  -3  -7   5  518.85   12.80
   2   7  -5  738.83   17.40
   2   7  -5  714.23   18.80
   2   7  -5  693.73   17.60
  -2  -7   5  746.93   17.40
  -2  -7   5  725.63   17.70
  -2  -7   5  736.53   18.60
  -2  -7   5  726.13   17.50
   1   7  -5  180.48    5.20
   1   7  -5  189.88    5.30
   1   7  -5  182.58    5.40
  -1  -7   5  186.78    5.20
  -1  -7   5  173.28    5.50
  -1  -7   5  176.88    5.30
   0   7  -5  250.17    6.80
   0   7  -5  238.78    6.80
   0  -7   5  245.08    6.70
   0  -7   5  253.77    7.10
  -1   7  -5  269.47    7.30
  -1   7  -5  270.57    7.30
   1  -7   5  265.27    7.20
   1  -7   5  259.57    7.60
   1  -7   5  270.37    7.30
  -2   7  -5   86.49    3.40
  -2   7  -5   93.19    3.60
  -2   7  -5   84.09    3.70
   2  -7   5   85.29    3.70
   2  -7   5   89.19    3.50
   2  -7   5   93.69    3.80
   2  -7   5   98.89    3.70
  -3   7  -5   70.99    3.40
  -3   7  -5   73.59    3.20
  -3   7  -5   71.89    3.60
   3  -7   5   74.19    3.50
   3  -7   5   69.69    3.10
   3  -7   5   73.49    3.40
  -4   7  -5  435.96   12.70
  -4   7  -5  456.05   11.80
  -4   7  -5  477.65   11.80
   4  -7   5  441.76   12.80
   4  -7   5  455.25   11.60
   4  -7   5  466.15   11.80
  -5   7  -5  257.67    7.70
  -5   7  -5  269.27    8.30
  -5   7  -5  273.87    7.60
   5  -7   5  234.78    8.30
   5  -7   5  260.77    7.40
   5  -7   5  261.17    7.50
  -6   7  -5  323.47    8.80
  -6   7  -5  297.07    8.90
   6  -7   5  299.37    8.60
   6  -7   5  309.77   10.00
   6  -7   5  310.57    8.60
  -7   7  -5    8.00    2.30
   7  -7   5   11.40    2.60
   7  -7   5   12.90    2.00
  -8   7  -5   -1.10    2.10
   8  -7   5    1.20    2.50
  -9   7  -5   65.99    5.30
   9  -7   5   66.29    6.00
 -10   7  -5   -0.30    2.70
  10  -7   5   -2.20    3.10
  11   6  -5   23.60    3.30
  11   6  -5   25.30    3.60
  11   6  -5   27.70    4.20
  10   6  -5  148.09    6.80
  10   6  -5  152.08    7.80
  10   6  -5  142.09    6.40
   9   6  -5    7.40    2.70
   9   6  -5    7.50    2.40
   9   6  -5    6.90    2.40
   8   6  -5   86.89    4.70
   8   6  -5   80.99    4.60
   8   6  -5   82.59    5.60
   7   6  -5   59.49    3.80
   7   6  -5   68.29    4.00
   6   6  -5  117.69    4.70
   6   6  -5  102.79    4.30
  -6  -6   5  105.49    3.40
  -6  -6   5  105.19    3.40
   5   6  -5 1025.20   27.00
   5   6  -5 1059.49   25.40
  -5  -6   5 1071.49   24.50
  -5  -6   5 1044.00   24.50
   4   6  -5   58.39    3.10
   4   6  -5   57.29    2.80
  -4  -6   5   59.59    2.60
  -4  -6   5   61.09    3.10
  -4  -6   5   54.79    2.30
   3   6  -5 1463.05   35.00
   3   6  -5 1507.95   34.40
   3   6  -5 1467.65   37.70
  -3  -6   5 1515.45   34.60
  -3  -6   5 1479.25   37.60
  -3  -6   5 1506.65   34.60
  -3  -6   5 1515.25   35.10
   2   6  -5    9.10    1.30
   2   6  -5   11.10    1.40
   2   6  -5   10.30    1.10
  -2  -6   5   11.40    1.10
  -2  -6   5   11.10    1.30
  -2  -6   5    6.10    1.10
  -2  -6   5   11.30    1.20
   1   6  -5  444.56   10.80
   1   6  -5  435.26   11.60
   1   6  -5  417.76   10.90
  -1  -6   5  446.16   10.80
  -1  -6   5  426.36   11.70
  -1  -6   5  446.46   10.80
   0   6  -5   23.20    2.00
   0   6  -5   23.90    1.90
   0   6  -5   20.90    1.90
   0  -6   5   24.20    2.10
   0  -6   5   20.00    1.80
   0  -6   5   22.80    1.80
  -1   6  -5  553.14   13.60
  -1   6  -5  558.54   13.50
   1  -6   5  565.84   13.50
   1  -6   5  532.55   14.70
   1  -6   5  557.74   13.60
   1  -6   5  543.85   14.40
  -2   6  -5   69.79    2.90
  -2   6  -5   68.09    3.00
   2  -6   5   68.69    3.10
   2  -6   5   71.89    3.20
   2  -6   5   68.39    3.10
[truncated: 1,012,958 more chars]
