# Supplementary material for: Structural Diversity and Carbon Dioxide Sorption Selectivity of Zinc(II) Metal-Organic Frameworks Based on Bis(1,2,4-triazol-1-yl)methane and Terephthalic Acid
Source: Molecules. 2022 Oct 1;27(19):6481. doi: 10.3390/molecules27196481 (PMC9571910; doi:10.3390/molecules27196481)
Supplement: Supplementary file 1 [file molecules-27-06481-s001.zip › 2.cif]

data_tgs142
_audit_creation_date               2022-09-16
_audit_creation_method
;
Olex2 1.2
(compiled 2018.05.29 svn.r3508 for OlexSys, GUI svn.r5506)
;
_shelx_SHELXL_version_number       '2017/1'
_audit_contact_author_address      ?
_audit_contact_author_email        ?
_audit_contact_author_name         ''
_audit_contact_author_phone        ?
_publ_contact_author_id_orcid      ?
_publ_section_references
;
Dolomanov, O.V., Bourhis, L.J., Gildea, R.J, Howard, J.A.K. & Puschmann, H.
 (2009), J. Appl. Cryst. 42, 339-341.

Sheldrick, G.M. (2015). Acta Cryst. A71, 3-8.

Sheldrick, G.M. (2015). Acta Cryst. C71, 3-8.
;
_chemical_name_common              ?
_chemical_name_systematic          ?
_chemical_formula_moiety           'C29 H18 N6 O12 Zn3, 8[C3 H7 N O]'
_chemical_formula_sum              'C53 H74 N14 O20 Zn3'
_chemical_formula_weight           1423.4
_chemical_melting_point            ?
loop_
  _atom_type_symbol
  _atom_type_description
  _atom_type_scat_dispersion_real
  _atom_type_scat_dispersion_imag
  _atom_type_scat_source
 'C' 'C' 0.0033 0.0016 'International Tables Vol C Tables 4.2.6.8 and 6.1.1.4'
 'H' 'H' 0.0000 0.0000 'International Tables Vol C Tables 4.2.6.8 and 6.1.1.4'
 'N' 'N' 0.0061 0.0033 'International Tables Vol C Tables 4.2.6.8 and 6.1.1.4'
 'O' 'O' 0.0106 0.0060 'International Tables Vol C Tables 4.2.6.8 and 6.1.1.4'
 'Zn' 'Zn' 0.2839 1.4301 'International Tables Vol C Tables 4.2.6.8 and 6.1.1.4'

_shelx_space_group_comment
;
The symmetry employed for this shelxl refinement is uniquely defined
by the following loop, which should always be used as a source of
symmetry information in preference to the above space-group names.
They are only intended as comments.
;
_space_group_crystal_system        'orthorhombic'
_space_group_IT_number             61
_space_group_name_H-M_alt          'P b c a'
_space_group_name_Hall             '-P 2ac 2ab'
loop_
  _space_group_symop_operation_xyz
 'x, y, z'
 '-x+1/2, -y, z+1/2'
 '-x, y+1/2, -z+1/2'
 'x+1/2, -y+1/2, -z'
 '-x, -y, -z'
 'x-1/2, y, -z-1/2'
 'x, -y-1/2, z-1/2'
 '-x-1/2, y-1/2, z'

_cell_length_a                     20.1879(7)
_cell_length_b                     18.2491(6)
_cell_length_c                     32.9335(10)
_cell_angle_alpha                  90
_cell_angle_beta                   90
_cell_angle_gamma                  90
_cell_volume                       12133.1(7)
_cell_formula_units_Z              8
_cell_measurement_reflns_used      9907
_cell_measurement_temperature      298(2)
_cell_measurement_theta_max        25.55
_cell_measurement_theta_min        2.31
_shelx_estimated_absorpt_T_max     0.888
_shelx_estimated_absorpt_T_min     0.793
_exptl_absorpt_coefficient_mu      1.215
_exptl_absorpt_correction_T_max    0.7453
_exptl_absorpt_correction_T_min    0.5699
_exptl_absorpt_correction_type     multi-scan
_exptl_absorpt_process_details    
 'SADABS-2012/1 (Bruker,2012) was used for absorption correction. wR2(int) was 0.0796 before and 0.0620 after correction. The Ratio of minimum to maximum transmission is 0.7647. The \l/2 correction factor is 0.0015.'
_exptl_absorpt_special_details     ?
_exptl_crystal_colour              colourless
_exptl_crystal_colour_primary      colourless
_exptl_crystal_density_diffrn      1.558
_exptl_crystal_density_meas        .
_exptl_crystal_density_method      ?
_exptl_crystal_description         block
_exptl_crystal_F_000               3360
_exptl_crystal_size_max            0.2
_exptl_crystal_size_mid            0.1
_exptl_crystal_size_min            0.1
_exptl_transmission_factor_max     ?
_exptl_transmission_factor_min     ?
_diffrn_reflns_av_R_equivalents    0.0594
_diffrn_reflns_av_unetI/netI       0.0379
_diffrn_reflns_Laue_measured_fraction_full  0.999
_diffrn_reflns_Laue_measured_fraction_max  0.999
_diffrn_reflns_limit_h_max         22
_diffrn_reflns_limit_h_min         -23
_diffrn_reflns_limit_k_max         13
_diffrn_reflns_limit_k_min         -21
_diffrn_reflns_limit_l_max         38
_diffrn_reflns_limit_l_min         -38
_diffrn_reflns_number              70277
_diffrn_reflns_point_group_measured_fraction_full  0.999
_diffrn_reflns_point_group_measured_fraction_max  0.999
_diffrn_reflns_theta_full          24.406
_diffrn_reflns_theta_max           24.405
_diffrn_reflns_theta_min           1.596
_diffrn_ambient_temperature        298(2)
_diffrn_detector                   CCD
_diffrn_detector_area_resol_mean   8.33
_diffrn_detector_type              'Bruker APEXII CCD area detector'
_diffrn_measured_fraction_theta_full  0.999
_diffrn_measured_fraction_theta_max  0.999
_diffrn_measurement_device         '\k-geometry diffractometer'
_diffrn_measurement_device_type    'Bruker APEX diffractometer'
_diffrn_measurement_method         '\w and \f scans'
_diffrn_radiation_monochromator    'graphite'
_diffrn_radiation_type             MoK\a
_diffrn_radiation_wavelength       0.71073
_diffrn_source                     'sealed tube'
_diffrn_special_details            ?
_diffrn_standards_interval_count   .
_diffrn_standards_interval_time    .
_diffrn_standards_number           .
_reflns_Friedel_coverage           0.000
_reflns_Friedel_fraction_full      .
_reflns_Friedel_fraction_max       .
_reflns_number_gt                  8234
_reflns_number_total               9982
_reflns_special_details
;
 Reflections were merged by SHELXL according to the crystal
 class for the calculation of statistics and refinement.
 
 Structure factors included contributions from the .fab file.
 
 _reflns_Friedel_fraction is defined as the number of unique
 Friedel pairs measured divided by the number that would be
 possible theoretically, ignoring centric projections and
 systematic absences.
;
_reflns_threshold_expression       'I > 2\s(I)'
_computing_cell_refinement         'Bruker SAINT'
_computing_data_collection         'Bruker APEX2'
_computing_data_reduction          'Bruker SAINT'
_computing_molecular_graphics      'Olex2 (Dolomanov et al., 2009)'
_computing_publication_material    'Olex2 (Dolomanov et al., 2009)'
_computing_structure_refinement    'ShelXL (Sheldrick, 2015)'
_computing_structure_solution      'ShelXT (Sheldrick, 2015)'
_refine_diff_density_max           0.800
_refine_diff_density_min           -1.233
_refine_diff_density_rms           0.136
_refine_ls_extinction_coef         .
_refine_ls_extinction_method       none
_refine_ls_goodness_of_fit_ref     1.059
_refine_ls_hydrogen_treatment      constr
_refine_ls_matrix_type             full
_refine_ls_number_parameters       451
_refine_ls_number_reflns           9982
_refine_ls_number_restraints       81
_refine_ls_R_factor_all            0.0889
_refine_ls_R_factor_gt             0.0788
_refine_ls_restrained_S_all        1.057
_refine_ls_shift/su_max            0.001
_refine_ls_shift/su_mean           0.000
_refine_ls_structure_factor_coef   Fsqd
_refine_ls_weighting_details      
 'w=1/[\s^2^(Fo^2^)+(0.0906P)^2^+88.5030P] where P=(Fo^2^+2Fc^2^)/3'
_refine_ls_weighting_scheme        calc
_refine_ls_wR_factor_gt            0.2107
_refine_ls_wR_factor_ref           0.2172
_refine_special_details            ?
_olex2_refinement_description
;
1. Fixed Uiso
 At 1.2 times of:
  All C(H) groups, All C(H,H) groups
2. Rigid body (RIGU) restrains
 N1, C27, N6, N5, C23, C28, N3, N4, C29, N2, C25
 with sigma for 1-2 distances of 0.004 and sigma for 1-3 distances of 0.004
3.a Secondary CH2 refined with riding coordinates:
 C28(H28A,H28B)
3.b Aromatic/amide H refined with riding coordinates:
 C5(H5), C8(H8), C12(H12), C14(H14), C16(H16), C17(H17), C19(H19), C20(H20),
 C21(H21), C22(H22), C23(H23), C24(H24), C25(H25), C26(H26), C27(H27), C29(H29)
;
_atom_sites_solution_hydrogens     geom
_atom_sites_solution_primary       dual
_atom_sites_solution_secondary     ?
loop_
  _atom_site_label
  _atom_site_type_symbol
  _atom_site_fract_x
  _atom_site_fract_y
  _atom_site_fract_z
  _atom_site_U_iso_or_equiv
  _atom_site_adp_type
  _atom_site_occupancy
  _atom_site_site_symmetry_order
  _atom_site_calc_flag
  _atom_site_refinement_flags_posn
  _atom_site_refinement_flags_adp
  _atom_site_refinement_flags_occupancy
  _atom_site_disorder_assembly
  _atom_site_disorder_group
 Zn1 Zn 0.87021(3) 0.22421(4) 0.52311(2) 0.0280(2) Uani 1 1 d . . . . .
 Zn2 Zn 0.90942(4) 0.24608(4) 0.42711(2) 0.0308(2) Uani 1 1 d . . . . .
 Zn3 Zn 0.38385(4) 0.28351(4) 0.37088(2) 0.0299(2) Uani 1 1 d . . . . .
 O1 O 0.9078(2) 0.1638(2) 0.46872(14) 0.0382(11) Uani 1 1 d . . . . .
 O2 O 0.3224(2) 0.3676(3) 0.45484(16) 0.0456(12) Uani 1 1 d . . . . .
 O3 O 0.4578(2) 0.3045(3) 0.45089(17) 0.0494(13) Uani 1 1 d . . . . .
 O4 O 0.9491(3) 0.3380(3) 0.44149(17) 0.0516(14) Uani 1 1 d . . . . .
 O5 O 0.8135(2) 0.2610(3) 0.42341(16) 0.0530(14) Uani 1 1 d . . . . .
 O6 O 0.3344(3) 0.3673(3) 0.38673(16) 0.0558(14) Uani 1 1 d . . . . .
 O7 O 0.4748(2) 0.2700(3) 0.38670(16) 0.0560(15) Uani 1 1 d . . . . .
 O8 O 0.7907(3) 0.2512(3) 0.48954(16) 0.0580(15) Uani 1 1 d . . . . .
 O9 O 0.9208(3) 0.3207(3) 0.50690(18) 0.0689(18) Uani 1 1 d . . . . .
 O10 O 1.0043(3) 0.1669(3) 0.43869(18) 0.0645(17) Uani 1 1 d . . . . .
 O11 O 0.1616(3) 0.6897(3) 0.36538(18) 0.0677(17) Uani 1 1 d . . . . .
 O12 O 0.1673(4) 0.7111(3) 0.43111(19) 0.0723(19) Uani 1 1 d . . . . .
 N1 N 0.4017(3) 0.3094(3) 0.31225(17) 0.0467(15) Uani 1 1 d . U . . .
 N2 N 0.4331(3) 0.2416(4) 0.13222(17) 0.0451(14) Uani 1 1 d . U . . .
 N3 N 0.4761(4) 0.2706(5) 0.1897(2) 0.075(2) Uani 1 1 d . U . . .
 N4 N 0.4609(7) 0.2026(6) 0.1948(3) 0.116(4) Uani 1 1 d . U . . .
 N5 N 0.4550(5) 0.3191(6) 0.2553(2) 0.088(3) Uani 1 1 d . U . . .
 N6 N 0.3945(6) 0.3528(7) 0.2486(3) 0.113(4) Uani 1 1 d . U . . .
 C1 C 0.9834(4) 0.0663(4) 0.4822(2) 0.0406(16) Uani 1 1 d . . . . .
 C2 C 0.7753(3) 0.2595(4) 0.4535(2) 0.0396(16) Uani 1 1 d . . . . .
 C3 C 0.2798(4) 0.4671(4) 0.4162(2) 0.0407(17) Uani 1 1 d . . . . .
 C4 C 0.3150(4) 0.3948(4) 0.4207(2) 0.0415(17) Uani 1 1 d . . . . .
 C5 C 1.0481(4) 0.0415(4) 0.4812(3) 0.0487(19) Uani 1 1 d . . . . .
 H5 H 1.080990 0.069906 0.469197 0.058 Uiso 1 1 calc R . . . .
 C6 C 0.4953(3) 0.2841(4) 0.4225(2) 0.0397(17) Uani 1 1 d . . . . .
 C7 C 0.7020(3) 0.2686(4) 0.4450(2) 0.0436(18) Uani 1 1 d . . . . .
 C8 C 0.9363(4) 0.0250(4) 0.5021(2) 0.0455(18) Uani 1 1 d . . . . .
 H8 H 0.893225 0.042686 0.504137 0.055 Uiso 1 1 calc R . . . .
 C9 C 0.2135(4) 0.5994(4) 0.4064(2) 0.0466(18) Uani 1 1 d . . . . .
 C10 C 0.5675(3) 0.2791(4) 0.4299(2) 0.0392(16) Uani 1 1 d . . . . .
 C11 C 0.1790(4) 0.6703(4) 0.4024(2) 0.0462(18) Uani 1 1 d . . . . .
 C12 C 0.5919(4) 0.2825(5) 0.4682(2) 0.051(2) Uani 1 1 d . . . . .
 H12 H 0.562906 0.289612 0.489832 0.062 Uiso 1 1 calc R . . . .
 C13 C 0.9455(4) 0.3574(4) 0.4786(3) 0.050(2) Uani 1 1 d . . . . .
 C14 C 0.2632(4) 0.5085(4) 0.4490(2) 0.053(2) Uani 1 1 d . . . . .
 H14 H 0.274363 0.491976 0.474776 0.063 Uiso 1 1 calc R . . . .
 C15 C 0.9736(4) 0.4311(4) 0.4902(2) 0.0444(18) Uani 1 1 d . . . . .
 C16 C 0.2620(5) 0.4925(4) 0.3771(2) 0.061(2) Uani 1 1 d . . . . .
 H16 H 0.272728 0.465019 0.354302 0.073 Uiso 1 1 calc R . . . .
 C17 C 0.6584(4) 0.2759(5) 0.4759(2) 0.058(2) Uani 1 1 d . . . . .
 H17 H 0.673646 0.276344 0.502516 0.070 Uiso 1 1 calc R . . . .
 C18 C 0.9658(3) 0.1378(4) 0.4626(2) 0.0366(16) Uani 1 1 d . . . . .
 C19 C 0.9737(5) 0.4540(4) 0.5297(3) 0.067(3) Uani 1 1 d . . . . .
 H19 H 0.957156 0.423324 0.549860 0.080 Uiso 1 1 calc R . . . .
 C20 C 0.6118(4) 0.2731(6) 0.3977(2) 0.063(3) Uani 1 1 d . . . . .
 H20 H 0.596396 0.272956 0.371139 0.075 Uiso 1 1 calc R . . . .
 C21 C 0.2298(4) 0.5749(4) 0.4451(2) 0.054(2) Uani 1 1 d . . . . .
 H21 H 0.218710 0.602294 0.467893 0.065 Uiso 1 1 calc R . . . .
 C22 C 0.9983(5) 0.5226(5) 0.5401(3) 0.065(3) Uani 1 1 d . . . . .
 H22 H 0.996427 0.538322 0.566942 0.078 Uiso 1 1 calc R . . . .
 C23 C 0.4582(5) 0.2947(6) 0.2926(2) 0.067(2) Uani 1 1 d . U . . .
 H23 H 0.494441 0.270588 0.303840 0.080 Uiso 1 1 calc R . . . .
 C24 C 0.6790(4) 0.2675(6) 0.4055(3) 0.069(3) Uani 1 1 d . . . . .
 H24 H 0.708668 0.262977 0.384047 0.083 Uiso 1 1 calc R . . . .
 C25 C 0.4600(5) 0.2933(6) 0.1523(3) 0.070(2) Uani 1 1 d . U . . .
 H25 H 0.467394 0.340285 0.142435 0.084 Uiso 1 1 calc R . . . .
 C26 C 0.2289(5) 0.5575(5) 0.3728(2) 0.069(3) Uani 1 1 d . . . . .
 H26 H 0.216630 0.573497 0.347109 0.083 Uiso 1 1 calc R . . . .
 C27 C 0.3667(6) 0.3429(7) 0.2834(3) 0.092(4) Uani 1 1 d . U . . .
 H27 H 0.323561 0.358587 0.288291 0.110 Uiso 1 1 calc R . . . .
 C28 C 0.5025(6) 0.3130(10) 0.2223(3) 0.128(5) Uani 1 1 d . U . . .
 H28A H 0.513743 0.361600 0.212505 0.154 Uiso 1 1 calc R . . . .
 H28B H 0.542719 0.290153 0.232241 0.154 Uiso 1 1 calc R . . . .
 C29 C 0.4376(8) 0.1838(6) 0.1577(3) 0.104(4) Uani 1 1 d . U . . .
 H29 H 0.426021 0.136216 0.150469 0.125 Uiso 1 1 calc R . . . .

loop_
  _atom_site_aniso_label
  _atom_site_aniso_U_11
  _atom_site_aniso_U_22
  _atom_site_aniso_U_33
  _atom_site_aniso_U_23
  _atom_site_aniso_U_13
  _atom_site_aniso_U_12
 Zn1 0.0273(4) 0.0251(4) 0.0317(4) 0.0074(3) -0.0024(3) -0.0003(3)
 Zn2 0.0291(4) 0.0310(4) 0.0324(4) 0.0065(3) 0.0022(3) -0.0001(3)
 Zn3 0.0294(4) 0.0286(4) 0.0318(4) 0.0044(3) 0.0029(3) -0.0004(3)
 O1 0.041(3) 0.033(2) 0.041(3) 0.003(2) -0.008(2) 0.014(2)
 O2 0.041(3) 0.041(3) 0.054(3) 0.009(2) 0.000(2) 0.015(2)
 O3 0.023(2) 0.062(3) 0.063(3) -0.008(3) 0.005(2) -0.008(2)
 O4 0.064(4) 0.038(3) 0.053(3) -0.007(2) 0.011(3) -0.024(3)
 O5 0.033(3) 0.073(4) 0.054(3) 0.017(3) 0.005(2) 0.015(3)
 O6 0.070(4) 0.048(3) 0.049(3) 0.007(3) 0.001(3) 0.028(3)
 O7 0.033(3) 0.092(4) 0.042(3) -0.003(3) -0.001(2) 0.011(3)
 O8 0.036(3) 0.090(4) 0.049(3) 0.016(3) -0.006(2) 0.024(3)
 O9 0.096(5) 0.047(3) 0.064(4) -0.003(3) 0.006(3) -0.032(3)
 O10 0.077(4) 0.048(3) 0.068(4) 0.024(3) 0.020(3) 0.022(3)
 O11 0.086(5) 0.051(3) 0.066(4) 0.004(3) -0.025(3) 0.026(3)
 O12 0.090(5) 0.058(4) 0.068(4) -0.008(3) 0.007(4) 0.037(4)
 N1 0.072(4) 0.036(3) 0.032(3) -0.001(2) 0.003(3) 0.001(3)
 N2 0.047(4) 0.059(4) 0.029(3) -0.003(2) -0.004(3) 0.010(3)
 N3 0.079(5) 0.113(6) 0.031(3) -0.005(4) 0.003(3) -0.005(5)
 N4 0.183(11) 0.115(7) 0.051(5) 0.028(5) -0.018(6) 0.008(7)
 N5 0.107(6) 0.127(8) 0.031(3) 0.000(4) 0.005(4) -0.018(5)
 N6 0.146(8) 0.138(9) 0.055(5) 0.029(6) -0.001(5) 0.013(7)
 C1 0.044(4) 0.036(4) 0.042(4) 0.002(3) 0.005(3) 0.012(3)
 C2 0.028(4) 0.042(4) 0.048(4) 0.001(3) -0.004(3) 0.008(3)
 C3 0.053(4) 0.027(3) 0.042(4) -0.004(3) -0.002(3) 0.016(3)
 C4 0.044(4) 0.037(4) 0.043(4) 0.007(3) 0.006(3) 0.008(3)
 C5 0.033(4) 0.041(4) 0.072(5) 0.016(4) 0.007(4) -0.001(3)
 C6 0.030(4) 0.049(4) 0.040(4) 0.016(3) 0.007(3) 0.011(3)
 C7 0.022(3) 0.066(5) 0.043(4) 0.010(4) 0.000(3) 0.002(3)
 C8 0.035(4) 0.035(4) 0.066(5) 0.018(4) 0.006(4) 0.018(3)
 C9 0.057(5) 0.034(4) 0.049(4) 0.001(3) -0.007(4) 0.017(3)
 C10 0.024(3) 0.056(4) 0.039(4) 0.009(3) 0.005(3) 0.007(3)
 C11 0.049(4) 0.032(4) 0.057(5) 0.002(4) 0.000(4) 0.017(3)
 C12 0.039(4) 0.078(6) 0.036(4) -0.005(4) 0.006(3) 0.016(4)
 C13 0.038(4) 0.035(4) 0.075(6) 0.018(4) 0.010(4) -0.012(3)
 C14 0.064(5) 0.056(5) 0.038(4) 0.005(4) -0.008(4) 0.023(4)
 C15 0.050(4) 0.045(4) 0.039(4) -0.003(3) 0.001(3) -0.012(3)
 C16 0.093(7) 0.047(5) 0.041(4) -0.008(4) -0.002(4) 0.038(5)
 C17 0.038(4) 0.102(7) 0.035(4) -0.002(4) 0.000(3) 0.011(4)
 C18 0.044(4) 0.030(3) 0.036(4) 0.001(3) -0.003(3) 0.006(3)
 C19 0.110(8) 0.037(4) 0.053(5) -0.001(4) 0.013(5) -0.043(5)
 C20 0.029(4) 0.126(8) 0.034(4) 0.006(5) -0.002(3) 0.024(5)
 C21 0.083(6) 0.041(4) 0.039(4) -0.007(3) -0.003(4) 0.023(4)
 C22 0.091(7) 0.052(5) 0.051(5) -0.021(4) 0.019(5) -0.045(5)
 C23 0.061(5) 0.108(8) 0.031(4) 0.000(4) 0.002(3) -0.009(5)
 C24 0.026(4) 0.134(9) 0.047(5) 0.017(5) 0.009(4) 0.021(5)
 C25 0.077(6) 0.095(6) 0.038(4) 0.000(4) -0.002(4) -0.018(5)
 C26 0.111(8) 0.058(5) 0.039(4) 0.006(4) -0.010(5) 0.035(5)
 C27 0.098(7) 0.138(10) 0.040(5) 0.022(5) -0.003(4) 0.020(7)
 C28 0.102(8) 0.256(15) 0.027(4) -0.023(7) 0.006(5) -0.062(9)
 C29 0.200(14) 0.075(6) 0.038(5) 0.008(4) 0.001(6) 0.019(7)

_geom_special_details
;
 All esds (except the esd in the dihedral angle between two l.s. planes)
 are estimated using the full covariance matrix.  The cell esds are taken
 into account individually in the estimation of esds in distances, angles
 and torsion angles; correlations between esds in cell parameters are only
 used when they are defined by crystal symmetry.  An approximate (isotropic)
 treatment of cell esds is used for estimating esds involving l.s. planes.
;
loop_
  _geom_bond_atom_site_label_1
  _geom_bond_atom_site_label_2
  _geom_bond_distance
  _geom_bond_site_symmetry_2
  _geom_bond_publ_flag
 Zn1 O1 2.236(5) . ?
 Zn1 O2 2.065(5) 4_556 ?
 Zn1 O3 2.033(5) 4_556 ?
 Zn1 O8 2.010(5) . ?
 Zn1 O9 2.105(5) . ?
 Zn1 O12 2.059(6) 5_666 ?
 Zn2 O1 2.033(4) . ?
 Zn2 O4 1.918(5) . ?
 Zn2 O5 1.959(5) . ?
 Zn2 O10 2.428(6) . ?
 Zn2 N2 2.013(6) 6_656 ?
 Zn2 C18 2.562(6) . ?
 Zn3 O6 1.900(5) . ?
 Zn3 O7 1.925(5) . ?
 Zn3 O11 1.950(6) 8_655 ?
 Zn3 N1 2.021(6) . ?
 O1 C18 1.278(8) . ?
 O2 C4 1.238(8) . ?
 O3 C6 1.259(8) . ?
 O4 C13 1.273(10) . ?
 O5 C2 1.256(9) . ?
 O6 C4 1.287(9) . ?
 O7 C6 1.277(9) . ?
 O8 C2 1.237(9) . ?
 O9 C13 1.251(9) . ?
 O10 C18 1.228(9) . ?
 O11 C11 1.319(9) . ?
 O12 C11 1.226(9) . ?
 N1 C23 1.337(11) . ?
 N1 C27 1.332(11) . ?
 N2 C25 1.274(11) . ?
 N2 C29 1.351(12) . ?
 N3 N4 1.290(13) . ?
 N3 C25 1.338(11) . ?
 N3 C28 1.426(13) . ?
 N4 C29 1.355(14) . ?
 N5 N6 1.385(14) . ?
 N5 C23 1.309(11) . ?
 N5 C28 1.454(13) . ?
 N6 C27 1.289(13) . ?
 C1 C5 1.384(10) . ?
 C1 C8 1.377(10) . ?
 C1 C18 1.500(9) . ?
 C2 C7 1.516(9) . ?
 C3 C4 1.506(9) . ?
 C3 C14 1.360(10) . ?
 C3 C16 1.415(10) . ?
 C5 H5 0.9300 . ?
 C5 C8 1.370(10) 5_756 ?
 C6 C10 1.479(9) . ?
 C7 C17 1.352(10) . ?
 C7 C24 1.381(11) . ?
 C8 H8 0.9300 . ?
 C9 C11 1.475(9) . ?
 C9 C21 1.390(11) . ?
 C9 C26 1.379(11) . ?
 C10 C12 1.358(10) . ?
 C10 C20 1.391(10) . ?
 C12 H12 0.9300 . ?
 C12 C17 1.371(11) . ?
 C13 C15 1.509(10) . ?
 C14 H14 0.9300 . ?
 C14 C21 1.391(10) . ?
 C15 C19 1.366(11) . ?
 C15 C22 1.427(11) 5_766 ?
 C16 H16 0.9300 . ?
 C16 C26 1.368(11) . ?
 C17 H17 0.9300 . ?
 C19 H19 0.9300 . ?
 C19 C22 1.389(10) . ?
 C20 H20 0.9300 . ?
 C20 C24 1.383(10) . ?
 C21 H21 0.9300 . ?
 C22 H22 0.9300 . ?
 C23 H23 0.9300 . ?
 C24 H24 0.9300 . ?
 C25 H25 0.9300 . ?
 C26 H26 0.9300 . ?
 C27 H27 0.9300 . ?
 C28 H28A 0.9700 . ?
 C28 H28B 0.9700 . ?
 C29 H29 0.9300 . ?

loop_
  _geom_angle_atom_site_label_1
  _geom_angle_atom_site_label_2
  _geom_angle_atom_site_label_3
  _geom_angle
  _geom_angle_site_symmetry_1
  _geom_angle_site_symmetry_3
  _geom_angle_publ_flag
 O2 Zn1 O1 92.34(19) 4_556 . ?
 O2 Zn1 O9 174.1(2) 4_556 . ?
 O3 Zn1 O1 85.13(19) 4_556 . ?
 O3 Zn1 O2 92.9(2) 4_556 4_556 ?
 O3 Zn1 O9 84.2(3) 4_556 . ?
 O3 Zn1 O12 99.1(2) 4_556 5_666 ?
 O8 Zn1 O1 87.2(2) . . ?
 O8 Zn1 O2 91.1(2) . 4_556 ?
 O8 Zn1 O3 171.5(2) . 4_556 ?
 O8 Zn1 O9 92.5(3) . . ?
 O8 Zn1 O12 88.2(3) . 5_666 ?
 O9 Zn1 O1 92.5(2) . . ?
 O12 Zn1 O1 173.7(2) 5_666 . ?
 O12 Zn1 O2 92.0(2) 5_666 4_556 ?
 O12 Zn1 O9 83.4(3) 5_666 . ?
 O1 Zn2 O10 57.82(19) . . ?
 O1 Zn2 C18 29.5(2) . . ?
 O4 Zn2 O1 119.1(2) . . ?
 O4 Zn2 O5 107.8(3) . . ?
 O4 Zn2 O10 98.8(2) . . ?
 O4 Zn2 N2 100.1(3) . 6_656 ?
 O4 Zn2 C18 112.1(2) . . ?
 O5 Zn2 O1 97.4(2) . . ?
 O5 Zn2 O10 150.7(2) . . ?
 O5 Zn2 N2 100.4(2) . 6_656 ?
 O5 Zn2 C18 125.1(2) . . ?
 O10 Zn2 C18 28.3(2) . . ?
 N2 Zn2 O1 128.9(2) 6_656 . ?
 N2 Zn2 O10 86.6(2) 6_656 . ?
 N2 Zn2 C18 107.9(2) 6_656 . ?
 O6 Zn3 O7 122.0(3) . . ?
 O6 Zn3 O11 119.0(3) . 8_655 ?
 O6 Zn3 N1 99.7(2) . . ?
 O7 Zn3 O11 111.2(3) . 8_655 ?
 O7 Zn3 N1 96.8(3) . . ?
 O11 Zn3 N1 101.6(3) 8_655 . ?
 Zn2 O1 Zn1 100.46(18) . . ?
 C18 O1 Zn1 128.3(4) . . ?
 C18 O1 Zn2 98.9(4) . . ?
 C4 O2 Zn1 134.5(5) . 4_456 ?
 C6 O3 Zn1 139.5(5) . 4_456 ?
 C13 O4 Zn2 117.1(4) . . ?
 C2 O5 Zn2 123.7(5) . . ?
 C4 O6 Zn3 135.4(5) . . ?
 C6 O7 Zn3 122.3(4) . . ?
 C2 O8 Zn1 139.4(5) . . ?
 C13 O9 Zn1 146.1(6) . . ?
 C18 O10 Zn2 81.9(4) . . ?
 C11 O11 Zn3 106.0(5) . 8_665 ?
 C11 O12 Zn1 169.6(7) . 5_666 ?
 C23 N1 Zn3 124.6(6) . . ?
 C27 N1 Zn3 133.8(7) . . ?
 C27 N1 C23 101.6(7) . . ?
 C25 N2 Zn2 125.2(6) . 6_556 ?
 C25 N2 C29 103.1(8) . . ?
 C29 N2 Zn2 130.5(6) . 6_556 ?
 N4 N3 C25 111.1(9) . . ?
 N4 N3 C28 120.8(10) . . ?
 C25 N3 C28 128.0(11) . . ?
 N3 N4 C29 102.0(8) . . ?
 N6 N5 C28 119.8(9) . . ?
 C23 N5 N6 110.1(9) . . ?
 C23 N5 C28 130.0(11) . . ?
 C27 N6 N5 100.4(9) . . ?
 C5 C1 C18 119.9(7) . . ?
 C8 C1 C5 119.0(6) . . ?
 C8 C1 C18 121.1(6) . . ?
 O5 C2 C7 116.8(6) . . ?
 O8 C2 O5 127.3(6) . . ?
 O8 C2 C7 115.9(6) . . ?
 C14 C3 C4 121.7(7) . . ?
 C14 C3 C16 118.5(6) . . ?
 C16 C3 C4 119.8(6) . . ?
 O2 C4 O6 126.6(6) . . ?
 O2 C4 C3 119.9(6) . . ?
 O6 C4 C3 113.5(6) . . ?
 C1 C5 H5 120.1 . . ?
 C8 C5 C1 119.7(7) 5_756 . ?
 C8 C5 H5 120.1 5_756 . ?
 O3 C6 O7 123.4(6) . . ?
 O3 C6 C10 119.3(7) . . ?
 O7 C6 C10 117.3(6) . . ?
 C17 C7 C2 120.4(7) . . ?
 C17 C7 C24 119.4(7) . . ?
 C24 C7 C2 120.1(6) . . ?
 C1 C8 H8 119.4 . . ?
 C5 C8 C1 121.1(7) 5_756 . ?
 C5 C8 H8 119.4 5_756 . ?
 C21 C9 C11 118.4(7) . . ?
 C26 C9 C11 121.5(7) . . ?
 C26 C9 C21 120.1(7) . . ?
 C12 C10 C6 120.5(6) . . ?
 C12 C10 C20 118.5(7) . . ?
 C20 C10 C6 120.9(6) . . ?
 O11 C11 C9 116.3(7) . . ?
 O12 C11 O11 119.9(7) . . ?
 O12 C11 C9 123.8(7) . . ?
 C10 C12 H12 119.3 . . ?
 C10 C12 C17 121.5(7) . . ?
 C17 C12 H12 119.3 . . ?
 O4 C13 C15 118.0(6) . . ?
 O9 C13 O4 126.1(7) . . ?
 O9 C13 C15 115.9(8) . . ?
 C3 C14 H14 119.0 . . ?
 C3 C14 C21 122.0(7) . . ?
 C21 C14 H14 119.0 . . ?
 C19 C15 C13 121.0(7) . . ?
 C19 C15 C22 119.0(7) . 5_766 ?
 C22 C15 C13 120.0(7) 5_766 . ?
 C3 C16 H16 119.9 . . ?
 C26 C16 C3 120.2(7) . . ?
 C26 C16 H16 119.9 . . ?
 C7 C17 C12 120.5(7) . . ?
 C7 C17 H17 119.7 . . ?
 C12 C17 H17 119.7 . . ?
 O1 C18 Zn2 51.6(3) . . ?
 O1 C18 C1 118.2(6) . . ?
 O10 C18 Zn2 69.8(4) . . ?
 O10 C18 O1 121.3(6) . . ?
 O10 C18 C1 120.2(6) . . ?
 C1 C18 Zn2 166.7(5) . . ?
 C15 C19 H19 119.6 . . ?
 C15 C19 C22 120.7(7) . . ?
 C22 C19 H19 119.6 . . ?
 C10 C20 H20 120.1 . . ?
 C24 C20 C10 119.8(7) . . ?
 C24 C20 H20 120.1 . . ?
 C9 C21 C14 118.7(7) . . ?
 C9 C21 H21 120.7 . . ?
 C14 C21 H21 120.7 . . ?
 C15 C22 H22 119.9 5_766 . ?
 C19 C22 C15 120.2(7) . 5_766 ?
 C19 C22 H22 119.9 . . ?
 N1 C23 H23 125.0 . . ?
 N5 C23 N1 110.0(9) . . ?
 N5 C23 H23 125.0 . . ?
 C7 C24 C20 120.1(7) . . ?
 C7 C24 H24 119.9 . . ?
 C20 C24 H24 119.9 . . ?
 N2 C25 N3 110.7(9) . . ?
 N2 C25 H25 124.6 . . ?
 N3 C25 H25 124.6 . . ?
 C9 C26 H26 119.7 . . ?
 C16 C26 C9 120.5(7) . . ?
 C16 C26 H26 119.7 . . ?
 N1 C27 H27 121.1 . . ?
 N6 C27 N1 117.8(11) . . ?
 N6 C27 H27 121.1 . . ?
 N3 C28 N5 110.9(9) . . ?
 N3 C28 H28A 109.5 . . ?
 N3 C28 H28B 109.5 . . ?
 N5 C28 H28A 109.5 . . ?
 N5 C28 H28B 109.5 . . ?
 H28A C28 H28B 108.0 . . ?
 N2 C29 N4 112.7(10) . . ?
 N2 C29 H29 123.6 . . ?
 N4 C29 H29 123.6 . . ?

loop_
  _geom_torsion_atom_site_label_1
  _geom_torsion_atom_site_label_2
  _geom_torsion_atom_site_label_3
  _geom_torsion_atom_site_label_4
  _geom_torsion
  _geom_torsion_site_symmetry_1
  _geom_torsion_site_symmetry_2
  _geom_torsion_site_symmetry_3
  _geom_torsion_site_symmetry_4
  _geom_torsion_publ_flag
 Zn1 O1 C18 Zn2 -110.9(5) . . . . ?
 Zn1 O1 C18 O10 -106.9(7) . . . . ?
 Zn1 O1 C18 C1 79.4(7) . . . . ?
 Zn1 O2 C4 O6 4.5(13) 4_456 . . . ?
 Zn1 O2 C4 C3 -175.8(5) 4_456 . . . ?
 Zn1 O3 C6 O7 48.0(11) 4_456 . . . ?
 Zn1 O3 C6 C10 -134.8(7) 4_456 . . . ?
 Zn1 O8 C2 O5 -9.8(14) . . . . ?
 Zn1 O8 C2 C7 169.9(6) . . . . ?
 Zn1 O9 C13 O4 -4.0(17) . . . . ?
 Zn1 O9 C13 C15 176.5(8) . . . . ?
 Zn1 O12 C11 O11 66(4) 5_666 . . . ?
 Zn1 O12 C11 C9 -116(3) 5_666 . . . ?
 Zn2 O1 C18 O10 4.0(8) . . . . ?
 Zn2 O1 C18 C1 -169.7(5) . . . . ?
 Zn2 O4 C13 O9 3.2(11) . . . . ?
 Zn2 O4 C13 C15 -177.3(5) . . . . ?
 Zn2 O5 C2 O8 2.6(11) . . . . ?
 Zn2 O5 C2 C7 -177.1(5) . . . . ?
 Zn2 O10 C18 O1 -3.4(6) . . . . ?
 Zn2 O10 C18 C1 170.3(6) . . . . ?
 Zn2 N2 C25 N3 -173.1(6) 6_556 . . . ?
 Zn2 N2 C29 N4 174.4(8) 6_556 . . . ?
 Zn3 O6 C4 O2 -4.1(13) . . . . ?
 Zn3 O6 C4 C3 176.1(5) . . . . ?
 Zn3 O7 C6 O3 3.6(11) . . . . ?
 Zn3 O7 C6 C10 -173.7(5) . . . . ?
 Zn3 O11 C11 O12 -2.3(10) 8_665 . . . ?
 Zn3 O11 C11 C9 178.8(6) 8_665 . . . ?
 Zn3 N1 C23 N5 -179.1(6) . . . . ?
 Zn3 N1 C27 N6 177.8(9) . . . . ?
 O3 C6 C10 C12 12.5(11) . . . . ?
 O3 C6 C10 C20 -165.4(8) . . . . ?
 O4 C13 C15 C19 -177.4(8) . . . . ?
 O4 C13 C15 C22 1.6(12) . . . 5_766 ?
 O5 C2 C7 C17 -172.5(8) . . . . ?
 O5 C2 C7 C24 9.2(12) . . . . ?
 O7 Zn3 O6 C4 -62.8(8) . . . . ?
 O7 C6 C10 C12 -170.2(8) . . . . ?
 O7 C6 C10 C20 12.0(12) . . . . ?
 O8 C2 C7 C17 7.7(12) . . . . ?
 O8 C2 C7 C24 -170.6(8) . . . . ?
 O9 C13 C15 C19 2.1(12) . . . . ?
 O9 C13 C15 C22 -178.9(8) . . . 5_766 ?
 O11 Zn3 O6 C4 83.7(8) 8_655 . . . ?
 N1 Zn3 O6 C4 -167.2(8) . . . . ?
 N3 N4 C29 N2 -6.0(16) . . . . ?
 N4 N3 C25 N2 1.0(13) . . . . ?
 N4 N3 C28 N5 -63.0(18) . . . . ?
 N5 N6 C27 N1 2.2(16) . . . . ?
 N6 N5 C23 N1 0.7(13) . . . . ?
 N6 N5 C28 N3 -61.6(18) . . . . ?
 C2 C7 C17 C12 -178.7(8) . . . . ?
 C2 C7 C24 C20 177.7(9) . . . . ?
 C3 C14 C21 C9 -0.3(14) . . . . ?
 C3 C16 C26 C9 1.0(16) . . . . ?
 C4 C3 C14 C21 -179.0(8) . . . . ?
 C4 C3 C16 C26 178.7(9) . . . . ?
 C5 C1 C8 C5 -3.5(14) . . . 5_756 ?
 C5 C1 C18 Zn2 151.7(19) . . . . ?
 C5 C1 C18 O1 -170.8(7) . . . . ?
 C5 C1 C18 O10 15.3(11) . . . . ?
 C6 C10 C12 C17 178.1(8) . . . . ?
 C6 C10 C20 C24 -179.1(9) . . . . ?
 C8 C1 C5 C8 3.4(14) . . . 5_756 ?
 C8 C1 C18 Zn2 -30(3) . . . . ?
 C8 C1 C18 O1 7.9(10) . . . . ?
 C8 C1 C18 O10 -166.0(8) . . . . ?
 C10 C12 C17 C7 2.7(15) . . . . ?
 C10 C20 C24 C7 -0.7(16) . . . . ?
 C11 C9 C21 C14 -179.1(8) . . . . ?
 C11 C9 C26 C16 178.8(9) . . . . ?
 C12 C10 C20 C24 3.0(14) . . . . ?
 C13 C15 C19 C22 -178.5(9) . . . . ?
 C14 C3 C4 O2 8.5(12) . . . . ?
 C14 C3 C4 O6 -171.7(8) . . . . ?
 C14 C3 C16 C26 0.2(14) . . . . ?
 C15 C19 C22 C15 -2.6(17) . . . 5_766 ?
 C16 C3 C4 O2 -169.9(8) . . . . ?
 C16 C3 C4 O6 9.9(11) . . . . ?
 C16 C3 C14 C21 -0.6(13) . . . . ?
 C17 C7 C24 C20 -0.6(15) . . . . ?
 C18 C1 C5 C8 -177.8(7) . . . 5_756 ?
 C18 C1 C8 C5 177.8(7) . . . 5_756 ?
 C20 C10 C12 C17 -4.0(14) . . . . ?
 C21 C9 C11 O11 -176.7(8) . . . . ?
 C21 C9 C11 O12 4.4(13) . . . . ?
 C21 C9 C26 C16 -1.9(15) . . . . ?
 C22 C15 C19 C22 2.6(17) 5_766 . . . ?
 C23 N1 C27 N6 -1.8(15) . . . . ?
 C23 N5 N6 C27 -1.6(14) . . . . ?
 C23 N5 C28 N3 115.7(13) . . . . ?
 C24 C7 C17 C12 -0.3(14) . . . . ?
 C25 N2 C29 N4 6.6(14) . . . . ?
 C25 N3 N4 C29 3.0(14) . . . . ?
 C25 N3 C28 N5 112.6(13) . . . . ?
 C26 C9 C11 O11 2.6(13) . . . . ?
 C26 C9 C11 O12 -176.2(9) . . . . ?
 C26 C9 C21 C14 1.5(14) . . . . ?
 C27 N1 C23 N5 0.6(11) . . . . ?
 C28 N3 N4 C29 179.3(11) . . . . ?
 C28 N3 C25 N2 -175.0(10) . . . . ?
 C28 N5 N6 C27 176.2(12) . . . . ?
 C28 N5 C23 N1 -176.9(11) . . . . ?
 C29 N2 C25 N3 -4.5(11) . . . . ?

_smtbx_masks_special_details       ?
loop_
  _smtbx_masks_void_nr
  _smtbx_masks_void_average_x
  _smtbx_masks_void_average_y
  _smtbx_masks_void_average_z
  _smtbx_masks_void_volume
  _smtbx_masks_void_count_electrons
  _smtbx_masks_void_content
 1 -0.464 -0.223 -0.908 7215.9 2571.5 ?

_shelx_res_file
;
TITL tgs142_a.res in Pbca
    tgs142.res
    created by SHELXL-2017/1 at 16:49:21 on 16-Sep-2022
REM Old TITL tgs142 in P2(1)2(1)2(1)
REM SHELXT solution in Pbca
REM R1 0.318, Rweak 0.025, Alpha 0.080, Orientation a'=b, b'=a, c'=-c
REM Formula found by SHELXT: C33 N7 O13 Zn3
CELL 0.71073 20.1879 18.2491 32.9335 90 90 90
ZERR 8 0.0007 0.0006 0.001 0 0 0
LATT 1
SYMM 0.5-X,-Y,0.5+Z
SYMM -X,0.5+Y,0.5-Z
SYMM 0.5+X,0.5-Y,-Z
SFAC C H N O Zn
UNIT 232 144 48 96 24
RIGU N1 C27 N6 N5 C23 C28 N3 N4 C29 N2 C25

L.S. 8
PLAN  20
SIZE 0.2 0.1 0.1
TEMP 25(2)
BOND $H
list 4
MORE -1
CONF
ABIN
fmap 2
ACTA
SHEL 999 0.86
OMIT 0 0 2
OMIT 0 0 4
REM <olex2.extras>
REM <HklSrc "%.\\tgs142.hkl">
REM </olex2.extras>

WGHT    0.090600   88.502998
FVAR       0.08391
ZN1   5    0.870212    0.224209    0.523114    11.00000    0.02727    0.02508 =
         0.03167    0.00739   -0.00236   -0.00027
ZN2   5    0.909417    0.246075    0.427106    11.00000    0.02912    0.03096 =
         0.03244    0.00654    0.00219   -0.00009
ZN3   5    0.383848    0.283507    0.370885    11.00000    0.02936    0.02857 =
         0.03184    0.00442    0.00285   -0.00043
O1    4    0.907828    0.163824    0.468716    11.00000    0.04095    0.03268 =
         0.04095    0.00327   -0.00767    0.01357
O2    4    0.322391    0.367563    0.454843    11.00000    0.04147    0.04106 =
         0.05430    0.00933    0.00000    0.01455
O3    4    0.457821    0.304463    0.450893    11.00000    0.02314    0.06194 =
         0.06303   -0.00790    0.00523   -0.00810
O4    4    0.949076    0.338015    0.441493    11.00000    0.06350    0.03804 =
         0.05324   -0.00742    0.01091   -0.02369
O5    4    0.813527    0.261039    0.423407    11.00000    0.03255    0.07252 =
         0.05382    0.01662    0.00525    0.01550
O6    4    0.334427    0.367339    0.386732    11.00000    0.06983    0.04840 =
         0.04919    0.00701    0.00064    0.02757
O7    4    0.474831    0.269981    0.386699    11.00000    0.03341    0.09225 =
         0.04223   -0.00336   -0.00071    0.01071
O8    4    0.790716    0.251215    0.489541    11.00000    0.03550    0.09004 =
         0.04852    0.01609   -0.00576    0.02351
O9    4    0.920849    0.320706    0.506903    11.00000    0.09629    0.04675 =
         0.06364   -0.00325    0.00584   -0.03187
O10   4    1.004267    0.166948    0.438690    11.00000    0.07730    0.04803 =
         0.06807    0.02396    0.02009    0.02242
O11   4    0.161566    0.689744    0.365375    11.00000    0.08609    0.05066 =
         0.06642    0.00368   -0.02484    0.02616
O12   4    0.167287    0.711138    0.431114    11.00000    0.09017    0.05834 =
         0.06844   -0.00803    0.00727    0.03687
N1    3    0.401750    0.309390    0.312248    11.00000    0.07191    0.03631 =
         0.03175   -0.00138    0.00288    0.00066
N2    3    0.433089    0.241622    0.132222    11.00000    0.04720    0.05884 =
         0.02939   -0.00265   -0.00374    0.01042
N3    3    0.476109    0.270625    0.189713    11.00000    0.07940    0.11306 =
         0.03124   -0.00483    0.00276   -0.00541
N4    3    0.460915    0.202572    0.194834    11.00000    0.18315    0.11515 =
         0.05081    0.02775   -0.01784    0.00808
N5    3    0.454955    0.319136    0.255305    11.00000    0.10652    0.12712 =
         0.03142   -0.00018    0.00500   -0.01818
N6    3    0.394478    0.352844    0.248645    11.00000    0.14622    0.13840 =
         0.05465    0.02946   -0.00108    0.01335
C1    1    0.983386    0.066255    0.482238    11.00000    0.04428    0.03553 =
         0.04186    0.00236    0.00516    0.01162
C2    1    0.775321    0.259520    0.453477    11.00000    0.02841    0.04195 =
         0.04830    0.00141   -0.00444    0.00803
C3    1    0.279837    0.467125    0.416204    11.00000    0.05334    0.02655 =
         0.04228   -0.00389   -0.00211    0.01581
C4    1    0.314970    0.394763    0.420717    11.00000    0.04361    0.03745 =
         0.04336    0.00745    0.00592    0.00826
C5    1    1.048146    0.041490    0.481204    11.00000    0.03280    0.04107 =
         0.07227    0.01645    0.00686   -0.00082
AFIX  43
H5    2    1.080990    0.069906    0.469197    11.00000   -1.20000
AFIX   0
C6    1    0.495347    0.284104    0.422518    11.00000    0.03001    0.04927 =
         0.03967    0.01590    0.00652    0.01122
C7    1    0.701962    0.268551    0.444953    11.00000    0.02161    0.06591 =
         0.04320    0.00998   -0.00009    0.00166
C8    1    0.936314    0.025050    0.502065    11.00000    0.03548    0.03540 =
         0.06569    0.01809    0.00575    0.01758
AFIX  43
H8    2    0.893225    0.042686    0.504137    11.00000   -1.20000
AFIX   0
C9    1    0.213494    0.599437    0.406390    11.00000    0.05654    0.03404 =
         0.04917    0.00076   -0.00701    0.01659
C10   1    0.567458    0.279050    0.429883    11.00000    0.02352    0.05569 =
         0.03852    0.00919    0.00457    0.00740
C11   1    0.179025    0.670338    0.402431    11.00000    0.04920    0.03223 =
         0.05723    0.00208    0.00003    0.01655
C12   1    0.591912    0.282534    0.468247    11.00000    0.03924    0.07849 =
         0.03631   -0.00522    0.00584    0.01577
AFIX  43
H12   2    0.562906    0.289612    0.489832    11.00000   -1.20000
AFIX   0
C13   1    0.945452    0.357402    0.478573    11.00000    0.03847    0.03459 =
         0.07549    0.01803    0.01008   -0.01168
C14   1    0.263154    0.508529    0.448967    11.00000    0.06396    0.05609 =
         0.03828    0.00504   -0.00766    0.02322
AFIX  43
H14   2    0.274363    0.491976    0.474776    11.00000   -1.20000
AFIX   0
C15   1    0.973625    0.431073    0.490234    11.00000    0.05018    0.04450 =
         0.03854   -0.00316    0.00148   -0.01249
C16   1    0.261957    0.492539    0.377134    11.00000    0.09332    0.04707 =
         0.04125   -0.00827   -0.00209    0.03804
AFIX  43
H16   2    0.272728    0.465019    0.354302    11.00000   -1.20000
AFIX   0
C17   1    0.658394    0.275852    0.475872    11.00000    0.03765    0.10185 =
         0.03547   -0.00186    0.00028    0.01067
AFIX  43
H17   2    0.673646    0.276344    0.502516    11.00000   -1.20000
AFIX   0
C18   1    0.965765    0.137833    0.462641    11.00000    0.04372    0.02978 =
         0.03630    0.00125   -0.00335    0.00587
C19   1    0.973720    0.453978    0.529715    11.00000    0.10999    0.03721 =
         0.05310   -0.00120    0.01273   -0.04287
AFIX  43
H19   2    0.957156    0.423324    0.549860    11.00000   -1.20000
AFIX   0
C20   1    0.611826    0.273126    0.397746    11.00000    0.02880    0.12565 =
         0.03416    0.00649   -0.00248    0.02424
AFIX  43
H20   2    0.596396    0.272956    0.371139    11.00000   -1.20000
AFIX   0
C21   1    0.229829    0.574903    0.445076    11.00000    0.08340    0.04121 =
         0.03859   -0.00695   -0.00309    0.02286
AFIX  43
H21   2    0.218710    0.602294    0.467893    11.00000   -1.20000
AFIX   0
C22   1    0.998291    0.522568    0.540111    11.00000    0.09060    0.05225 =
         0.05138   -0.02133    0.01862   -0.04524
AFIX  43
H22   2    0.996427    0.538322    0.566942    11.00000   -1.20000
AFIX   0
C23   1    0.458199    0.294670    0.292624    11.00000    0.06093    0.10783 =
         0.03085    0.00002    0.00236   -0.00885
AFIX  43
H23   2    0.494441    0.270588    0.303840    11.00000   -1.20000
AFIX   0
C24   1    0.678954    0.267491    0.405480    11.00000    0.02632    0.13432 =
         0.04668    0.01673    0.00909    0.02077
AFIX  43
H24   2    0.708668    0.262977    0.384047    11.00000   -1.20000
AFIX   0
C25   1    0.459982    0.293276    0.152348    11.00000    0.07715    0.09514 =
         0.03791    0.00008   -0.00202   -0.01818
AFIX  43
H25   2    0.467394    0.340285    0.142435    11.00000   -1.20000
AFIX   0
C26   1    0.228865    0.557490    0.372848    11.00000    0.11130    0.05787 =
         0.03895    0.00583   -0.00972    0.03549
AFIX  43
H26   2    0.216630    0.573497    0.347109    11.00000   -1.20000
AFIX   0
C27   1    0.366672    0.342896    0.283448    11.00000    0.09770    0.13776 =
         0.03978    0.02203   -0.00313    0.01956
AFIX  43
H27   2    0.323561    0.358587    0.288291    11.00000   -1.20000
AFIX   0
C28   1    0.502500    0.313038    0.222297    11.00000    0.10201    0.25611 =
         0.02710   -0.02345    0.00568   -0.06219
AFIX  23
H28A  2    0.513743    0.361600    0.212505    11.00000   -1.20000
H28B  2    0.542719    0.290153    0.232241    11.00000   -1.20000
AFIX   0
C29   1    0.437627    0.183789    0.157673    11.00000    0.19980    0.07455 =
         0.03803    0.00847    0.00083    0.01869
AFIX  43
H29   2    0.426021    0.136216    0.150469    11.00000   -1.20000
AFIX   0
HKLF 4


REM  tgs142_a.res in Pbca
REM R1 =  0.0788 for    8234 Fo > 4sig(Fo)  and  0.0889 for all    9982 data
REM    451 parameters refined using     81 restraints

END

WGHT      0.0899     89.0305

REM Highest difference peak  0.800,  deepest hole -1.233,  1-sigma level  0.136
Q1    1   0.8739  0.2865  0.4318  11.00000  0.05    0.80
Q2    1   0.3971  0.2402  0.3601  11.00000  0.05    0.65
Q3    1   0.8716  0.2183  0.5519  11.00000  0.05    0.55
Q4    1   0.4097  0.3016  0.2770  11.00000  0.05    0.54
Q5    1   0.8145  0.3290  0.4823  11.00000  0.05    0.53
Q6    1   0.8640  0.1770  0.5203  11.00000  0.05    0.52
Q7    1   0.7878  0.2504  0.5171  11.00000  0.05    0.51
Q8    1   1.0001  0.3191  0.5369  11.00000  0.05    0.50
Q9    1   0.3975  0.2760  0.1776  11.00000  0.05    0.49
Q10   1   0.8428  0.3009  0.3813  11.00000  0.05    0.49
Q11   1   0.1350  0.6782  0.3910  11.00000  0.05    0.48
Q12   1   0.3763  0.2816  0.2740  11.00000  0.05    0.46
Q13   1   0.4590  0.2667  0.4831  11.00000  0.05    0.45
Q14   1   0.9311  0.2838  0.4218  11.00000  0.05    0.44
Q15   1   0.3379  0.2961  0.2703  11.00000  0.05    0.43
Q16   1   0.3042  0.4803  0.4907  11.00000  0.05    0.43
Q17   1   0.3858  0.3432  0.3785  11.00000  0.05    0.43
Q18   1   0.4352  0.3391  0.4843  11.00000  0.05    0.43
Q19   1   0.4182  0.3006  0.1887  11.00000  0.05    0.41
Q20   1   0.9190  0.4655  0.5380  11.00000  0.05    0.41
;
_shelx_res_checksum                10665
_shelx_hkl_file
;
   0  -1   0   -6.80    0.10
   0   2   0 4394.26  222.78
   0  -2   0 4697.83  222.78
   0  -2   0 5000.60  217.48
   0   2   0 4874.71  222.78
   0  -3   0   -0.10    0.30
   0  -3   0   -0.30    0.40
   0   3   0   -0.30    0.30
   0   3   0   -0.30    0.30
   0   4   0 9626.14  454.25
   0  -4   0 9461.65  443.26
   0  -4   0 9999.00  454.25
   0  -5   0   -1.20    0.70
   0   5   0   -0.40    0.50
   0  -5   0   -0.40    0.10
   0  -5   0   -0.30    0.50
   0  -6   0  349.17   16.40
   0  -6   0  339.87   16.10
   0   6   0  353.76   16.40
   0  -7   0   -0.40    0.80
   0  -7   0   -0.10    0.10
   0   7   0   -0.20    0.50
   0  -7   0   -1.20    0.60
   0  -8   0   93.29    4.80
   0   8   0   92.79    4.70
   0  -8   0  107.99    4.90
   0  -9   0    0.20    0.20
   0  -9   0    0.60    1.00
   0  -9   0   -0.40    0.80
   0   9   0   -0.30    0.60
   0 -10   0  255.77   12.30
   0 -10   0  261.97   12.20
   0 -11   0   -0.10    0.20
   0 -11   0   -1.40    1.20
   0 -11   0   -0.20    0.90
   0 -12   0   31.00    2.60
   0 -12   0   31.50    2.10
   0 -13   0   -0.80    1.00
   0 -13   0   -1.20    1.40
   0 -14   0   36.40    2.50
   0 -14   0   38.30    2.90
   0 -15   0   -2.90    1.70
   0 -15   0   -2.80    1.10
   0 -16   0   44.30    3.40
   0 -16   0   33.60    2.70
   0 -17   0   -1.40    2.00
   0 -17   0    2.00    1.30
   0 -18   0   30.60    3.00
   0 -18   0   27.50    2.50
   0 -19   0   -0.60    1.40
   0 -19   0    3.50    2.40
   0 -20   0   29.40    3.30
   0 -20   0   21.10    2.10
   0 -21   0   -1.30    1.60
   0 -21   0    0.60    2.70
   0 -22   0    9.20    3.10
  -1   0   0   -1.40    0.10
   1   0   0   -1.40    0.10
  -1   0   0   -1.50    0.10
   1   0   0   -1.40    0.10
  -1   1   0   -0.50    0.20
  -1   1   0   -0.10    0.10
   1  -1   0   -0.30    0.20
  -1  -1   0   -0.20    0.10
   1  -1   0   -0.20    0.10
  -1   2   0   -0.80    0.20
   1  -2   0   -0.80    0.30
   1  -2   0   -1.10    0.20
  -1  -2   0   -0.30    0.30
  -1   2   0   -0.80    0.30
  -1   3   0   -0.70    0.40
   1  -3   0   -1.30    0.40
   1  -3   0   -2.00    0.40
  -1  -3   0    1.70    0.40
   1  -4   0    6.00    0.70
  -1  -4   0    5.50    0.80
   1  -4   0    3.50    0.60
  -1   4   0    3.10    0.60
   1  -5   0    2.90    0.70
   1  -5   0    4.20    0.70
  -1   6   0    0.80    0.60
   1  -6   0   -0.20    0.70
  -1  -6   0    0.20    0.40
  -1  -6   0    1.20    0.70
   1  -6   0    0.60    0.60
   1  -6   0   -0.80    0.60
  -1  -8   0    5.40    0.70
  -1   8   0    5.30    0.70
   1  -8   0    8.60    1.00
  -1  -8   0    3.80    0.60
  -1  -8   0    8.80    1.10
   1  -8   0    4.70    0.80
   1  -8   0    6.00    0.90
   1  -9   0   50.99    2.80
   1 -10   0   13.00    1.40
   1 -10   0    9.00    1.00
  -1 -10   0    4.00    0.80
  -1 -10   0    8.00    0.90
   1 -11   0   13.70    1.50
   1 -12   0   11.70    1.20
   1 -12   0    7.10    1.10
  -1 -12   0    5.60    0.90
  -1 -12   0   10.20    1.10
  -1 -12   0   12.00    1.50
  -1  12   0   10.10    1.00
  -1 -13   0   38.80    2.90
   1 -13   0   38.00    2.50
  -1 -13   0   37.00    2.40
   1 -13   0   41.70    2.90
   1 -14   0    4.60    1.60
   1 -14   0    4.40    1.20
  -1 -14   0    5.40    1.10
  -1 -14   0    7.70    1.80
   1 -15   0    1.00    1.30
  -1 -15   0    4.60    1.10
  -1 -15   0    4.30    1.80
   1 -15   0    2.00    1.70
   1 -16   0   -1.10    1.80
   1 -16   0    0.50    1.30
  -1 -16   0    0.40    1.90
  -1 -16   0    1.00    1.10
   1 -17   0    5.80    1.50
  -1 -17   0    8.90    2.20
  -1 -17   0    6.60    1.30
   1 -17   0    6.30    2.20
   1 -18   0    4.70    2.20
  -1 -18   0    1.30    2.20
   1 -18   0    2.90    1.50
  -1 -18   0    0.60    1.30
  -1 -19   0    4.70    2.30
   1 -19   0    1.20    1.60
   1 -19   0    3.20    2.40
  -1 -20   0   -1.30    2.40
   1 -20   0    1.10    1.60
   1 -20   0   -0.80    2.50
  -1 -21   0   -0.70    2.70
   1 -21   0   -1.10    1.60
   1 -21   0    3.00    2.70
   1 -22   0    1.70    2.90
  -1 -22   0    2.30    3.00
  -2   0   0  935.21   43.50
   2   0   0  987.20   43.50
  -2   0   0  856.91   43.50
   2   1   0 3883.01  204.28
  -2   1   0 4234.68  204.38
   2   1   0 4461.15  204.38
   2  -1   0 4150.58  204.48
  -2  -1   0 4812.32  208.78
  -2   1   0 4556.74  204.48
   2  -1   0 4362.46  204.48
   2  -2   0  163.68    8.20
  -2  -2   0  182.18    8.20
  -2  -2   0  184.28    8.00
  -2   2   0  173.08    8.20
   2   2   0  181.88    8.20
   2   2   0  168.08    8.20
   2  -2   0  162.68    8.20
   2  -3   0  883.81   42.40
  -2   3   0  904.41   42.40
   2  -3   0  881.51   42.40
  -2  -3   0  944.41   41.40
  -2   4   0  101.39    4.80
   2  -4   0   96.99    4.80
  -2  -4   0   96.09    4.70
   2  -4   0   96.29    4.80
  -2  -5   0  137.69    6.50
  -2   5   0  140.49    6.60
   2  -5   0  146.09    6.50
   2  -5   0  129.99    6.60
   2  -5   0  129.69    6.60
  -2   6   0  186.78    8.90
  -2  -6   0  188.38    8.70
   2  -6   0  185.18    8.90
   2  -6   0  195.78    8.70
   2  -6   0  173.48    8.90
   2  -7   0   97.39    4.60
   2  -7   0   93.69    4.70
   2  -7   0   88.09    4.70
  -2  -7   0   97.99    4.70
  -2   7   0   94.79    4.70
   2  -8   0  138.79    7.10
   2  -8   0  153.18    7.00
  -2   8   0  144.99    7.10
   2  -8   0  151.68    7.10
  -2  -8   0  143.99    7.00
  -2   9   0  147.49    7.30
  -2  -9   0  156.48    7.30
   2  -9   0  152.68    7.20
  -2  -9   0  144.59    7.20
   2  -9   0  157.58    7.30
   2  -9   0  142.09    7.30
   2 -10   0   31.10    2.10
   2 -10   0   31.40    2.30
  -2 -10   0   33.40    2.40
   2 -10   0   32.00    2.10
  -2  10   0   30.30    2.00
  -2 -11   0   15.50    1.30
   2 -11   0   15.40    1.50
   2 -11   0   11.90    1.30
   2 -12   0   -0.90    1.00
  -2 -12   0    0.50    0.80
  -2  12   0   -0.40    0.80
  -2 -12   0   -0.20    0.80
  -2 -12   0    0.00    1.30
   2 -12   0    1.40    1.30
  -2 -13   0   15.10    1.80
   2 -13   0   13.80    1.50
   2 -13   0   13.30    1.80
  -2 -14   0    2.40    1.00
   2 -14   0    2.20    1.50
  -2 -14   0    4.50    1.70
   2 -14   0    1.10    1.20
   2 -15   0   21.40    2.30
  -2 -15   0   22.30    2.40
   2 -15   0   21.70    1.90
   2 -16   0    0.90    1.40
   2 -16   0    0.20    1.80
  -2 -16   0   -0.30    1.90
  -2 -17   0   17.50    2.50
   2 -17   0   19.20    2.00
   2 -17   0   20.30    2.50
  -2 -18   0    3.40    2.30
   2 -18   0    0.70    2.10
   2 -18   0    1.30    1.50
   2 -19   0   14.70    1.90
  -2 -19   0   13.00    2.70
   2 -19   0   13.70    2.70
   2 -20   0    0.50    1.70
   2 -20   0   -0.10    2.50
  -2 -20   0    2.80    2.60
   2 -21   0   11.10    3.00
  -2 -21   0    8.30    3.00
   2 -21   0   11.60    2.00
   2 -22   0    2.90    3.00
  -2 -22   0    6.00    3.00
   2 -22   0    1.60    1.90
  -3   0   0    0.70    0.40
  -3   0   0   -0.50    0.30
   3   0   0   -0.10    0.40
   3   1   0    1.40    0.30
  -3  -1   0    1.70    0.30
   3  -1   0   -1.80    0.40
  -3  -1   0   -1.40    0.40
  -3   1   0   -1.40    0.40
   3   1   0   -0.10    0.40
  -3  -1   0   -0.70    0.30
  -3   1   0   -1.30    0.40
   3  -1   0   -1.90    0.40
   3  -2   0   -1.60    0.60
  -3   2   0   -1.80    0.60
  -3  -2   0    1.50    0.50
   3  -2   0   -1.90    0.60
   3   2   0   -0.20    0.40
  -3  -2   0   -0.50    0.30
  -3  -2   0   -0.20    0.50
   3   2   0    1.20    0.60
  -3  -3   0    0.40    0.50
   3  -3   0   -0.10    0.70
  -3  -3   0    0.00    0.10
  -3   3   0    0.40    0.80
  -3  -3   0    0.60    0.70
   3  -3   0   -0.20    0.70
  -3   4   0    5.30    0.90
   3  -4   0    4.80    0.80
   3  -4   0    5.40    0.90
  -3   5   0    1.20    0.70
   3  -5   0    0.60    0.70
   3  -5   0   -0.30    0.70
  -3  -5   0    0.30    0.70
   3  -6   0   -0.70    0.70
   3  -6   0   -0.10    0.80
  -3  -6   0    0.60    0.80
   3  -6   0    2.00    0.80
  -3   6   0    0.60    0.80
  -3   7   0    1.10    0.70
   3  -7   0   -0.50    0.80
   3  -7   0   -1.40    0.70
  -3  -7   0    0.00    0.80
   3  -7   0    1.00    0.80
   3  -9   0   36.00    2.30
   3  -9   0   35.60    2.30
  -3  -9   0   37.90    2.40
  -3   9   0   31.70    2.20
  -3  10   0    3.00    0.90
  -3 -10   0    3.80    1.20
   3 -10   0    4.30    1.10
   3 -10   0    2.40    1.10
   3 -11   0   12.30    1.40
  -3  11   0    8.20    1.10
  -3  12   0   22.10    2.00
   3 -12   0   34.20    2.40
  -3 -13   0   20.10    2.00
   3 -13   0   14.80    1.90
   3 -13   0   24.00    2.10
   3 -14   0    7.20    1.70
  -3 -14   0    7.50    1.80
   3 -14   0    7.80    1.40
   3 -15   0   -0.50    1.70
  -3 -15   0    0.00    1.80
   3 -15   0    3.00    1.40
   3 -16   0    1.10    1.80
  -3 -16   0    6.70    2.00
   3 -16   0    4.40    1.60
   3 -17   0    3.30    1.60
   3 -17   0   -0.40    2.00
  -3 -17   0   -0.40    2.10
  -3 -18   0    4.50    2.30
   3 -18   0    6.70    2.30
   3 -18   0    4.00    1.70
   3 -19   0   -0.80    2.30
  -3 -19   0    7.10    2.40
   3 -19   0    1.60    1.70
  -3 -20   0   -1.50    2.60
   3 -20   0    2.00    2.50
   3 -20   0    1.60    1.80
  -3 -21   0    3.40    2.90
   3 -21   0    1.10    1.90
   3 -21   0    3.00    2.80
   3 -22   0   -0.50    2.90
   3 -22   0   -1.40    1.90
  -3 -22   0   -0.60    2.90
  -4   0   0  106.69    5.50
  -4   0   0  113.99    5.50
   4   0   0  121.19    5.50
   4   1   0 1237.48   56.79
  -4   1   0 1248.88   56.89
  -4  -1   0 1256.07   57.99
  -4  -1   0 1141.19   56.79
  -4  -1   0 1229.38   56.79
   4  -1   0 1155.18   56.79
  -4  -2   0 5530.75  276.37
   4  -2   0 5763.52  276.67
  -4   2   0 6040.40  276.77
  -4  -2   0 6324.87  282.57
  -4  -2   0 5915.51  276.47
   4   2   0 5813.92  276.47
  -4  -3   0 1009.30   47.90
   4  -3   0  999.60   48.00
  -4   3   0 1018.20   48.00
   4   3   0 1005.60   47.90
  -4  -3   0 1075.09   46.80
  -4  -4   0  141.89    6.80
   4  -4   0  136.89    6.90
  -4  -4   0  146.29    6.80
  -4   4   0  146.09    7.00
   4  -5   0    3.60    0.90
  -4   5   0    5.40    1.00
  -4  -5   0    6.80    0.90
  -4  -6   0  200.98    9.50
   4  -6   0  198.38    9.70
  -4   6   0  206.48    9.70
   4  -7   0   14.10    1.30
  -4   7   0   17.00    1.40
  -4  -7   0   13.60    1.30
   4  -7   0   16.60    1.40
  -4  -8   0  169.48    8.00
   4  -8   0  169.48    7.90
  -4   8   0  160.88    8.10
   4  -8   0  164.58    8.10
   4  -9   0   14.10    1.40
   4  -9   0   14.90    1.40
  -4  -9   0   14.10    1.50
  -4   9   0   18.10    1.60
   4 -10   0   10.90    1.30
   4 -10   0    6.60    1.20
  -4 -10   0   10.00    1.40
  -4  10   0    7.50    1.10
  -4 -11   0   94.79    4.90
   4 -11   0   87.99    4.80
  -4  11   0   87.79    4.80
   4 -11   0   97.49    4.80
  -4 -12   0   61.29    3.80
  -4  12   0   58.29    3.40
   4 -12   0   64.89    3.60
   4 -12   0   59.99    3.60
  -4 -13   0   49.80    3.50
   4 -13   0   51.79    3.40
   4 -13   0   56.19    3.30
  -4  13   0   50.79    3.20
  -4 -14   0   44.40    3.40
   4 -14   0   40.60    2.90
   4 -14   0   38.70    3.10
   4 -15   0   13.50    1.80
  -4 -15   0    9.80    2.10
   4 -15   0    9.70    2.00
  -4 -16   0   80.29    5.20
   4 -16   0   83.69    4.80
   4 -16   0   87.79    5.10
   4 -17   0   25.00    2.40
   4 -17   0   25.90    2.70
  -4 -17   0   25.90    2.80
   4 -18   0   39.80    3.40
  -4 -18   0   45.00    3.90
   4 -18   0   42.80    3.50
   4 -19   0    7.60    2.50
  -4 -19   0    5.50    2.60
   4 -19   0    8.00    2.00
  -4 -20   0   31.20    3.30
   4 -20   0   24.60    3.20
   4 -20   0   25.70    2.60
   4 -21   0    9.00    2.20
   4 -21   0    9.40    2.90
  -4 -21   0    8.50    3.00
  -4 -22   0    4.70    3.10
   4 -22   0    4.80    3.00
  -5   0   0   -1.00    0.80
   5   0   0   -1.20    0.80
  -5  -1   0   -1.20    0.60
  -5  -1   0    0.50    0.60
  -5  -1   0   -0.10    0.70
   5   1   0    0.40    0.70
   5  -1   0   -1.40    0.80
  -5   1   0    0.30    0.80
   5   2   0    0.80    0.70
  -5   2   0    0.00    0.90
   5  -2   0    0.80    0.90
  -5  -2   0    1.20    0.70
  -5  -3   0   -1.70    0.60
   5   3   0    0.90    0.60
  -5   3   0   -2.60    0.90
   5  -3   0   -1.60    0.90
  -5  -3   0   -0.50    0.60
  -5  -4   0    2.80    0.80
  -5   4   0    0.20    0.90
  -5  -4   0    2.10    0.70
   5   4   0    1.90    0.60
   5  -4   0    2.40    0.90
  -5  -5   0   10.70    1.00
   5  -5   0    5.00    1.00
  -5   5   0    7.70    1.10
   5  -6   0    0.50    0.90
  -5  -6   0    0.10    0.50
  -5   6   0   -0.40    0.90
  -5  -6   0    0.90    0.90
  -5  -6   0   -0.30    0.40
   5  -8   0   10.20    1.30
   5  -8   0   13.70    1.20
   5  -9   0   25.30    2.10
  -5   9   0   23.20    2.00
   5  -9   0   25.20    1.90
  -5  10   0    0.50    1.10
   5 -10   0    3.70    1.20
  -5 -10   0    4.10    1.30
   5 -10   0    2.80    1.10
   5 -11   0    9.00    1.30
  -5  11   0    7.40    1.30
  -5 -11   0   10.50    1.50
   5 -13   0   28.10    2.50
  -5  13   0   18.30    1.90
   5 -13   0   33.40    2.50
  -5 -13   0   22.30    2.20
   5 -14   0    5.50    1.50
   5 -14   0    4.60    1.60
  -5 -14   0    2.80    1.80
  -5 -15   0    3.10    1.90
   5 -15   0    7.90    1.80
   5 -15   0    5.50    1.60
  -5 -16   0    0.70    1.90
   5 -16   0    3.20    1.70
   5 -16   0    3.00    1.90
   5 -17   0    6.10    2.10
   5 -17   0    3.20    1.80
  -5 -17   0    2.90    2.20
   5 -18   0    2.50    1.80
   5 -18   0   -0.90    2.10
  -5 -18   0    2.80    2.20
   5 -19   0    4.10    2.40
  -5 -19   0    2.00    2.40
   5 -19   0    1.30    1.90
   5 -20   0    0.60    2.50
  -5 -20   0    3.90    2.70
   5 -20   0    2.70    2.00
  -5 -21   0    0.40    2.70
   5 -21   0    1.00    2.70
   5 -21   0    0.10    2.00
  -6   0   0    4.30    0.90
   6   0   0    5.50    0.90
   6   1   0   98.59    4.90
  -6  -1   0  100.99    4.90
  -6   1   0   96.19    5.00
   6  -1   0   97.59    4.90
  -6  -1   0  101.89    4.90
  -6  -2   0   22.00    1.60
   6  -2   0   26.30    1.80
  -6  -2   0   21.80    1.60
   6   2   0   24.00    1.60
  -6  -2   0   28.30    1.60
  -6   2   0   28.20    1.90
  -6  -3   0  260.57   12.20
  -6   3   0  269.67   12.30
   6   3   0  268.77   12.20
  -6  -3   0  232.08   12.20
   6  -3   0  257.37   12.30
  -6  -4   0  269.97   13.70
  -6  -4   0  290.17   13.70
  -6   4   0  295.07   13.90
   6   4   0  294.47   13.70
   6  -4   0  300.27   13.80
  -6  -4   0  289.97   13.50
   6  -5   0  192.88    9.50
   6   5   0  197.48    9.40
  -6   5   0  196.48    9.60
  -6  -5   0  201.48    9.30
  -6  -6   0   68.99    3.30
  -6  -6   0   66.69    3.50
  -6   6   0   63.59    3.60
   6  -6   0   60.99    3.60
  -6  -7   0   46.40    2.40
  -6  -7   0   43.60    2.70
  -6   7   0   48.60    2.90
   6  -7   0   41.00    2.80
  -6   8   0   84.49    4.40
   6  -8   0   83.79    4.40
  -6  -8   0   80.99    4.40
   6  -9   0    6.60    1.30
  -6   9   0    6.40    1.20
  -6  -9   0    6.40    1.30
   6  -9   0    6.60    1.10
   6 -10   0   77.19    4.20
  -6  10   0   75.09    4.10
  -6 -10   0   75.49    4.10
   6 -10   0   72.09    4.00
   6 -11   0   54.79    3.30
   6 -11   0   53.09    3.20
  -6 -11   0   51.69    3.40
  -6  11   0   52.49    3.30
   6 -12   0  156.88    7.90
   6 -12   0  157.18    7.70
  -6  12   0  151.88    7.80
  -6 -12   0  158.48    7.80
  -6  13   0   81.39    4.60
  -6 -13   0   84.79    4.80
   6 -13   0   81.19    4.70
   6 -13   0   85.39    4.70
  -6 -14   0   68.89    4.40
   6 -14   0   70.59    4.20
   6 -14   0   70.29    4.20
  -6 -15   0  107.19    6.00
   6 -15   0  110.69    5.90
   6 -15   0  106.29    5.90
  -6 -16   0   15.90    2.40
   6 -16   0   15.30    2.10
   6 -16   0   16.10    2.20
  -6 -17   0  120.89    7.00
   6 -17   0  122.99    6.80
   6 -17   0  126.99    6.80
   6 -18   0   22.90    2.70
   6 -18   0   19.90    2.40
  -6 -18   0   17.90    2.80
  -6 -19   0   58.59    4.80
   6 -19   0   55.49    4.30
   6 -19   0   56.19    4.60
  -6 -20   0   17.70    3.10
   6 -20   0   14.20    2.40
   6 -20   0   17.50    2.90
  -6 -21   0   23.50    3.40
   6 -21   0   30.10    3.10
   6 -21   0   27.00    3.50
  -7   0   0   -1.00    0.80
   7   0   0    0.00    0.80
   7  -1   0    0.50    0.90
  -7   1   0    1.40    1.00
  -7  -1   0    4.60    0.70
   7   1   0    1.60    0.90
  -7  -1   0    1.30    0.90
  -7   2   0   -0.50    0.90
   7  -2   0   -0.80    0.90
   7   2   0    1.00    0.80
  -7  -2   0    2.00    0.70
  -7  -2   0    0.20    0.80
  -7   3   0    6.60    1.10
   7   3   0    6.00    0.90
  -7  -3   0    3.10    0.90
   7  -4   0   21.40    1.80
   7   4   0   22.00    1.50
  -7  -4   0   22.00    1.50
  -7   4   0   24.40    2.00
  -7  -5   0    2.00    0.90
  -7   5   0    1.40    1.10
  -7  -5   0   -0.10    0.70
  -7  -5   0    1.30    0.60
   7   5   0    1.40    0.70
   7  -5   0    0.50    1.00
   7  -6   0    8.20    1.30
  -7   7   0    7.20    1.30
   7  -7   0    7.40    1.30
   7  -8   0   25.80    2.20
  -7  -9   0    6.50    1.30
   7  -9   0    6.50    1.30
  -7   9   0    6.20    1.30
  -7 -10   0    6.50    1.40
  -7  10   0    5.90    1.30
   7 -10   0    4.20    1.20
   7 -10   0    4.90    1.40
  -7 -11   0    7.70    1.60
  -7  11   0    7.00    1.40
   7 -11   0    6.50    1.50
   7 -11   0    5.80    1.40
   7 -12   0   18.90    1.80
  -7 -12   0   16.60    1.90
  -7  12   0   17.60    1.80
   7 -13   0   14.10    1.80
   7 -13   0   11.70    1.80
  -7 -13   0   12.50    1.90
  -7  13   0   16.00    1.80
  -7 -14   0   11.80    2.10
   7 -14   0   11.90    1.90
   7 -14   0   14.30    2.00
   7 -15   0    3.30    1.70
   7 -15   0    1.30    1.80
  -7 -15   0    0.40    1.90
   7 -16   0    7.50    2.00
   7 -16   0   10.00    2.00
  -7 -16   0    9.40    2.20
   7 -17   0   -0.60    1.80
  -7 -17   0    2.60    2.20
   7 -17   0   -1.10    2.00
   7 -18   0    6.00    2.10
   7 -18   0    6.90    2.30
  -7 -18   0    3.10    2.40
   7 -19   0    1.10    2.10
   7 -19   0   -1.70    2.30
  -7 -19   0   -1.50    2.50
   7 -20   0    1.50    2.20
   7 -20   0    1.40    2.50
  -7 -20   0    1.90    2.70
   7 -21   0    2.90    2.40
   7 -21   0    0.30    2.70
  -7 -21   0    5.80    2.80
  -8   0   0   96.29    5.00
   8   0   0   99.69    5.00
   8   1   0   20.20    1.70
  -8  -1   0   24.60    1.50
   8  -1   0   20.80    1.80
  -8   1   0   20.80    1.80
  -8  -1   0   19.50    1.70
   8  -2   0   54.29    3.20
   8   2   0   54.99    3.00
  -8   2   0   55.29    3.20
  -8  -2   0   55.79    3.10
  -8  -2   0   58.99    3.00
   8  -3   0   88.09    4.40
   8   3   0   80.69    4.20
  -8  -3   0   73.89    4.20
  -8  -3   0   83.99    4.30
  -8   3   0   84.79    4.40
  -8  -3   0   91.09    4.30
   8  -4   0  329.37   15.30
   8   4   0  321.57   15.20
  -8  -4   0  288.67   15.20
  -8   4   0  330.87   15.30
  -8  -4   0  330.27   15.20
  -8  -5   0  371.66   16.90
   8  -5   0  368.36   17.00
  -8  -5   0  308.57   16.80
   8   5   0  360.16   16.80
  -8   5   0  367.86   17.00
  -8   6   0   46.50    2.90
  -8  -6   0   41.50    2.50
   8  -6   0   46.00    2.80
   8   6   0   43.00    2.30
  -8  -6   0   36.20    2.30
  -8  -7   0  103.99    5.00
  -8  -7   0  104.29    5.20
   8  -7   0   93.79    5.30
  -8   7   0   99.79    5.30
  -8  -8   0   10.40    1.50
   8  -8   0   11.30    1.50
  -8  -8   0    8.90    0.90
  -8   8   0   13.10    1.60
  -8   9   0  181.48    8.40
  -8  -9   0  151.58    8.00
  -8  -9   0  173.38    8.30
   8  -9   0  170.18    8.40
  -8 -10   0   62.79    3.90
  -8  10   0   67.29    3.90
   8 -10   0   65.39    3.90
  -8 -11   0  120.79    6.30
   8 -11   0  116.49    6.20
   8 -11   0  125.89    6.40
  -8  11   0  124.49    6.40
  -8  12   0   72.59    4.20
   8 -12   0   74.89    4.30
  -8 -12   0   65.79    4.20
   8 -12   0   72.29    4.10
   8 -13   0  177.58    8.90
  -8  13   0  182.08    8.90
   8 -13   0  182.08    8.70
  -8 -13   0  158.78    8.80
   8 -14   0  221.28   10.60
  -8 -14   0  213.18   10.80
   8 -14   0  218.08   10.90
   8 -15   0   43.80    3.50
   8 -15   0   40.30    3.60
  -8 -15   0   41.20    3.50
   8 -16   0  128.99    7.00
   8 -16   0  132.39    6.90
  -8 -16   0  120.09    6.90
   8 -17   0    2.20    2.00
  -8 -17   0    5.60    2.30
   8 -17   0    4.40    2.10
   8 -18   0  111.99    6.30
   8 -18   0  105.69    6.30
  -8 -18   0   98.39    6.50
   8 -19   0   16.20    2.50
   8 -19   0   16.20    2.80
  -8 -19   0   12.00    2.80
   8 -20   0   49.60    4.30
   8 -20   0   48.30    4.10
  -8 -20   0   45.40    4.00
  -8 -21   0    5.80    2.90
   8 -21   0   10.70    2.90
   8 -21   0    8.90    2.60
   9   0   0    0.70    1.00
  -9   0   0    0.70    1.10
  -9  -1   0    0.10    1.00
   9   1   0    1.40    1.00
  -9   1   0   -0.90    1.10
  -9  -1   0    2.00    0.80
   9  -1   0    0.10    1.00
  -9  -2   0    3.20    0.90
   9  -2   0    0.20    1.10
   9   2   0    0.60    1.00
  -9   2   0   -0.30    1.20
  -9  -2   0    1.70    1.10
   9  -3   0   10.90    1.40
   9   3   0   10.60    1.20
  -9  -4   0   28.50    2.00
   9  -4   0   36.80    2.50
  -9   4   0   35.60    2.50
  -9  -4   0   28.90    2.20
   9   4   0   31.00    2.10
   9   5   0   19.00    1.60
  -9  -6   0    5.20    0.90
   9   6   0    5.50    0.90
  -9  -6   0    2.70    1.00
  -9   6   0    4.20    1.40
   9  -6   0    5.60    1.40
  -9  -7   0    2.80    1.00
   9   7   0    7.90    0.90
  -9  -7   0    4.70    0.70
  -9  -8   0    0.60    0.20
   9  -9   0   12.90    1.60
  -9  -9   0   11.20    1.60
  -9   9   0   15.20    1.70
  -9  -9   0    9.80    1.20
  -9  -9   0    8.80    1.00
  -9  10   0    5.40    1.50
  -9 -10   0    6.20    1.50
   9 -10   0    6.10    1.50
  -9  11   0    3.10    1.50
  -9 -11   0   -0.90    1.50
   9 -11   0    3.50    1.50
   9 -12   0   10.60    1.80
  -9 -12   0   15.80    2.00
   9 -12   0   14.20    1.70
  -9  12   0   13.20    1.80
  -9 -13   0   21.70    2.30
   9 -13   0   19.40    2.10
  -9  13   0   21.40    2.20
   9 -13   0   19.70    2.20
  -9 -14   0    1.80    1.90
   9 -14   0    2.60    1.80
   9 -14   0    2.20    1.70
  -9 -15   0    1.10    2.00
   9 -15   0    5.20    1.80
   9 -15   0    4.70    1.90
  -9 -16   0   -1.10    2.00
   9 -16   0   -0.10    2.00
   9 -16   0   -0.10    1.90
   9 -17   0    3.50    2.10
   9 -17   0    4.90    2.10
  -9 -17   0    1.80    2.20
   9 -18   0   -0.90    2.20
  -9 -18   0   -1.30    2.30
   9 -18   0   -0.50    2.20
   9 -19   0    6.20    2.30
  -9 -19   0    1.80    2.60
   9 -19   0    2.50    2.40
  -9 -20   0    1.30    2.80
   9 -20   0   -0.10    2.60
   9 -20   0    2.60    2.50
 -10   0   0  204.28   10.20
  10   0   0  212.58   10.10
  10  -1   0  363.76   17.10
 -10  -1   0  354.16   17.10
 -10  -1   0  368.16   17.30
 -10   1   0  346.17   17.10
  10   1   0  356.16   17.10
 -10  -2   0  296.47   13.90
  10   2   0  277.97   13.90
  10  -2   0  290.47   13.90
 -10  -2   0  291.37   14.10
 -10   2   0  291.57   14.00
  10  -3   0  191.08    9.30
  10   3   0  185.88    9.20
 -10  -3   0  182.68    9.20
 -10  -3   0  191.38    9.40
 -10   3   0  196.68    9.40
  10  -4   0  261.37   12.30
 -10  -4   0  248.48   12.20
 -10   4   0  252.17   12.30
  10   4   0  252.27   12.20
 -10   5   0  567.14   26.00
  10   5   0  553.44   25.80
 -10  -5   0  589.64   25.90
 -10  -5   0  466.35   25.80
  10  -5   0  554.34   25.90
 -10  -6   0  212.08   12.00
 -10   6   0  260.87   12.30
  10   6   0  253.27   12.00
 -10  -6   0  274.37   12.10
  10  -6   0  264.27   12.30
  10   7   0   15.70    1.30
 -10  -7   0   17.40    1.50
  10  -7   0   17.70    1.80
 -10  -7   0   14.70    1.40
 -10   7   0   12.90    1.80
 -10  -8   0  124.69    6.30
  10  -8   0  126.99    6.60
 -10   8   0  124.49    6.60
  10  -9   0   79.89    4.70
 -10  -9   0   75.59    4.50
 -10  -9   0   85.59    4.30
 -10   9   0   79.09    4.60
 -10  10   0   55.39    3.70
  10 -10   0   55.89    3.80
 -10 -10   0   60.19    3.20
 -10 -10   0   50.69    3.70
 -10 -11   0   57.39    4.10
  10 -11   0   71.79    4.20
 -10  11   0   65.99    4.20
  10 -12   0   55.59    3.90
 -10 -12   0   54.49    3.90
  10 -12   0   56.79    3.60
 -10  12   0   60.39    3.90
 -10  13   0  269.57   12.90
 -10 -13   0  243.18   12.60
  10 -13   0  256.07   12.90
  10 -13   0  272.37   12.60
  10 -14   0   21.40    2.50
 -10 -14   0   20.60    2.40
  10 -14   0   22.40    2.30
  10 -15   0  181.98    9.10
  10 -15   0  178.88    8.80
 -10 -15   0  158.88    9.00
  10 -16   0    2.20    1.90
 -10 -16   0    0.70    2.10
  10 -16   0    1.40    2.00
 -10 -17   0  115.39    7.40
  10 -17   0  136.09    7.30
  10 -17   0  137.59    7.30
  10 -18   0    1.10    2.30
 -10 -18   0    0.80    2.50
  10 -18   0    0.30    2.20
 -10 -19   0   58.99    4.90
  10 -19   0   63.19    4.90
  10 -19   0   65.19    4.90
  10 -20   0    3.40    2.70
  10 -20   0    4.20    2.70
 -10 -20   0    3.60    2.90
 -11   0   0    2.10    1.30
  11   0   0    1.90    1.20
 -11   1   0    0.80    1.30
 -11  -1   0    1.60    1.20
  11  -1   0    3.90    1.20
  11   1   0   -0.60    1.10
 -11  -1   0    1.90    0.90
 -11  -2   0    4.10    1.30
  11   2   0    2.70    1.10
  11  -2   0    1.30    1.20
 -11   2   0    2.70    1.30
 -11  -2   0    4.80    1.00
  11   3   0    0.10    1.10
 -11  -3   0    2.20    1.20
 -11   3   0    3.30    1.40
  11  -3   0    2.70    1.30
 -11  -3   0    2.00    1.00
  11  -4   0   31.30    2.50
 -11  -4   0   25.90    2.30
  11   4   0   23.10    2.00
 -11   5   0    9.50    1.60
  11  -5   0    7.50    1.50
 -11  -5   0    8.70    1.30
  11   5   0    7.00    1.10
 -11   6   0    6.80    1.50
  11  -6   0    5.20    1.50
  11   6   0    4.20    1.00
 -11  -6   0    3.40    1.20
  11  -7   0    3.30    1.50
 -11   7   0    4.70    1.60
  11   7   0    5.80    1.00
 -11  -7   0    4.20    1.20
  11   8   0   38.50    2.30
  11  -8   0   45.60    3.10
 -11  -8   0   35.90    2.70
 -11  -9   0    5.90    1.30
  11  -9   0    5.40    1.70
 -11   9   0    7.20    1.70
 -11 -10   0    2.50    1.20
  11 -10   0    7.30    1.80
 -11  10   0    2.90    1.70
 -11  11   0    0.70    1.70
  11 -11   0   -0.20    1.80
 -11 -11   0    1.60    1.70
 -11  12   0   13.00    2.00
 -11 -12   0   13.00    2.10
  11 -12   0   14.40    2.10
 -11 -13   0   -1.10    1.90
  11 -13   0   -0.40    1.80
 -11  13   0   -2.70    1.80
  11 -13   0   -0.10    1.60
 -11 -14   0    0.80    2.00
  11 -14   0    6.90    2.00
  11 -14   0   -0.40    1.70
  11 -15   0   -3.50    1.90
 -11 -15   0    5.00    2.10
  11 -15   0   -1.60    1.80
  11 -16   0    2.30    2.00
 -11 -16   0   -0.20    2.20
  11 -16   0    3.70    2.20
 -11 -17   0    1.70    2.30
  11 -17   0   -1.90    2.10
  11 -17   0   -2.40    2.20
  11 -18   0    5.60    2.40
  11 -18   0    4.40    2.40
 -11 -18   0    6.30    2.60
 -11 -19   0   -2.10    2.60
  11 -19   0   -0.20    2.40
  11 -19   0   -1.10    2.30
 -12   0   0  118.79    6.10
  12   0   0  116.69    6.10
 -12   0   0  117.99    6.00
 -12  -1   0  158.08    8.10
  12  -1   0  162.38    8.10
 -12  -1   0  160.08    8.10
 -12   1   0  165.08    8.20
  12   1   0  163.98    8.10
 -12  -2   0   65.99    3.70
  12  -2   0   68.19    4.00
 -12  -2   0   71.39    4.00
 -12   2   0   69.49    4.00
  12   2   0   65.29    3.80
 -12  -3   0   61.69    3.70
  12   3   0   58.69    3.50
 -12   3   0   62.69    3.80
 -12  -3   0   62.59    3.50
  12  -3   0   63.39    3.80
 -12   4   0   59.09    3.70
  12  -4   0   58.69    3.60
 -12  -4   0   56.89    3.50
  12   4   0   55.09    3.30
 -12   5   0   38.20    3.00
 -12  -5   0   36.30    2.80
  12   5   0   38.20    2.50
  12  -5   0   39.10    3.00
  12   6   0   28.20    2.10
  12  -6   0   22.70    2.30
 -12  -6   0   26.10    2.30
 -12   6   0   31.20    2.80
 -12   7   0   30.10    2.50
  12   7   0   26.40    2.00
  12  -7   0   25.60    2.40
 -12  -7   0   27.50    2.40
 -12  -8   0   48.10    3.10
 -12   8   0   49.60    3.60
  12  -8   0   47.00    3.50
  12  -9   0    4.40    1.80
 -12  -9   0    3.10    1.30
 -12   9   0    1.70    1.80
  12 -10   0   49.10    3.80
 -12 -10   0   51.19    3.20
 -12  10   0   47.70    3.70
 -12 -11   0    1.10    1.30
 -12  11   0    5.50    1.90
  12 -11   0    3.60    1.90
 -12  12   0  177.88    9.80
 -12 -12   0  198.58    9.40
  12 -12   0  196.68    9.90
  12 -13   0    5.20    2.10
  12 -13   0    7.10    1.80
 -12 -14   0  113.99    6.80
  12 -14   0  131.89    6.70
  12 -14   0  122.69    6.90
  12 -15   0    2.00    2.10
  12 -15   0    1.70    1.80
 -12 -15   0    2.10    2.10
  12 -16   0  142.99    7.30
 -12 -16   0  125.49    7.60
  12 -16   0  135.29    7.60
  12 -17   0   -0.60    2.30
 -12 -17   0   -1.10    2.30
  12 -17   0   -0.90    2.00
  12 -18   0   57.19    4.80
  12 -18   0   62.99    4.80
 -12 -18   0   61.49    5.10
  12 -19   0    1.10    2.50
  12 -19   0    1.00    2.40
 -12 -19   0   -2.60    2.70
  13   0   0   -0.20    1.30
 -13   0   0   -0.50    1.40
 -13   0   0    1.30    1.00
 -13  -1   0    4.50    1.10
  13   1   0    2.60    1.30
 -13   1   0    0.70    1.50
 -13  -1   0    3.40    1.40
  13  -1   0    3.10    1.40
 -13  -2   0    0.00    1.40
  13   2   0    0.90    1.20
 -13  -2   0   -1.00    1.10
  13  -2   0   -1.80    1.40
 -13   2   0    0.70    1.50
 -13  -3   0   10.90    1.40
  13   3   0    8.90    1.40
 -13  -3   0    7.00    1.60
  13  -3   0   10.90    1.70
  13   4   0    3.00    1.20
 -13  -4   0    4.00    1.50
  13  -4   0    6.50    1.60
 -13   4   0    7.50    1.70
  13  -5   0    0.90    1.60
 -13   5   0    2.20    1.70
 -13  -5   0    3.20    1.50
  13   5   0    2.90    1.20
  13  -6   0    5.50    1.70
  13   6   0    2.80    1.20
 -13  -6   0    7.50    1.60
 -13   6   0    9.00    1.80
 -13  -7   0    9.50    1.60
 -13   7   0   12.60    2.00
  13  -7   0   11.80    1.90
  13  -8   0   11.40    2.00
 -13  -8   0    5.60    1.50
 -13   8   0    9.50    2.00
 -13  -9   0    6.10    1.60
 -13   9   0    8.20    2.00
  13  -9   0    8.20    2.00
 -13 -10   0   -1.00    1.40
 -13  10   0   -0.20    1.90
  13 -10   0    1.80    2.00
 -13 -11   0    0.70    1.50
  13 -11   0    3.10    2.10
 -13  11   0    4.00    2.00
  13 -12   0    2.20    2.10
 -13 -12   0   -0.10    1.40
 -13  12   0    3.70    2.10
  13 -13   0   -0.20    2.00
 -13 -13   0    1.10    1.40
  13 -14   0   -0.20    2.10
  13 -14   0    1.80    1.80
  13 -15   0    2.90    2.20
  13 -15   0    3.50    2.00
  13 -16   0    1.00    2.00
  13 -16   0   -0.70    2.20
  13 -17   0    2.10    2.10
  13 -17   0    1.30    2.40
  13 -18   0   -2.20    2.30
  13 -18   0   -1.40    2.40
 -14   0   0   84.89    5.00
  14   0   0   87.89    4.80
 -14   0   0   87.29    4.70
 -14  -1   0   13.50    1.90
 -14  -1   0   17.70    1.60
  14   1   0   15.90    1.80
 -14   1   0   16.80    2.10
  14  -1   0   14.30    1.90
  14   2   0   36.30    2.70
  14  -2   0   33.10    2.90
 -14  -2   0   36.70    2.50
 -14   2   0   34.10    3.10
 -14  -2   0   34.50    3.00
 -14  -3   0   46.10    3.00
 -14  -3   0   43.00    3.30
  14  -3   0   43.00    3.30
  14   3   0   45.70    3.00
 -14   3   0   45.70    3.50
 -14  -4   0    0.20    1.50
  14   4   0   -0.60    1.20
  14  -4   0   -2.90    1.50
 -14   4   0   -3.70    1.60
  14  -5   0   10.90    1.90
 -14   5   0    8.40    2.00
  14   5   0    6.60    1.40
 -14  -5   0    7.10    1.70
 -14  -6   0   -0.30    1.60
 -14   6   0   -1.70    1.80
  14  -6   0   -0.30    1.80
 -14  -7   0   14.40    1.90
  14  -7   0   12.60    2.20
 -14   7   0   10.00    2.20
 -14   8   0    0.80    2.00
  14  -8   0    1.00    1.90
 -14  -8   0    2.60    1.60
 -14   9   0   46.10    3.60
  14  -9   0   40.60    3.80
 -14  -9   0   50.19    3.40
  14 -10   0   -0.10    2.00
 -14 -10   0    6.30    1.70
 -14  10   0    1.30    2.10
 -14  11   0  133.79    7.60
 -14 -11   0  140.09    7.20
  14 -11   0  136.59    7.60
 -14  12   0   15.20    2.50
  14 -12   0   16.10    2.60
 -14 -12   0   17.50    2.00
  14 -13   0   90.29    6.00
 -14 -13   0  101.09    5.30
  14 -14   0   13.70    2.50
  14 -14   0    9.50    2.10
  14 -15   0  135.39    7.70
  14 -15   0  134.89    7.30
  14 -16   0    1.80    2.30
  14 -16   0    2.90    2.10
  14 -17   0   97.09    6.30
  14 -17   0   94.19    6.00
  14 -18   0   -3.10    2.30
  14 -18   0   -0.20    2.50
 -15   0   0    2.30    1.80
 -15   0   0    0.50    1.20
  15   0   0    0.40    1.50
  15   1   0   -0.40    1.40
 -15  -1   0   -1.10    1.70
  15  -1   0   -0.90    1.50
 -15   1   0   -0.80    1.70
 -15  -1   0    0.40    1.20
 -15   1   0    1.40    1.20
 -15  -2   0    2.10    1.70
  15   2   0    1.00    1.40
  15  -2   0    1.90    1.60
 -15   2   0   -0.60    1.80
 -15  -2   0    1.90    1.30
  15  -3   0   -1.70    1.60
 -15   3   0   -2.40    1.80
 -15  -3   0   -0.80    1.30
  15   3   0    0.80    1.40
 -15  -3   0   -1.30    1.60
  15  -4   0    2.30    1.80
 -15   4   0    7.10    2.00
 -15  -4   0    5.40    1.80
  15   4   0    3.20    1.50
  15  -5   0   -0.60    1.80
 -15  -5   0    0.50    1.70
 -15   5   0   -0.20    2.00
  15  -6   0    3.60    2.00
 -15  -6   0    2.40    1.70
 -15   6   0    0.00    2.00
 -15  -7   0    6.80    1.90
  15  -7   0   11.80    2.20
 -15   7   0    6.80    2.20
 -15  -8   0   15.30    2.10
  15  -8   0   18.80    2.40
 -15   8   0   17.50    2.50
 -15   9   0    1.30    2.20
 -15  -9   0    2.70    1.80
  15  -9   0    3.40    2.10
 -15 -10   0    2.00    1.80
 -15  10   0    2.80    2.10
  15 -10   0    0.00    2.20
 -15  11   0    1.20    2.10
  15 -11   0    1.10    2.20
 -15 -11   0    1.70    1.80
 -15  12   0    1.60    2.20
  15 -12   0    1.40    2.30
 -15 -13   0    1.40    1.80
  15 -13   0    0.60    2.30
 -15 -14   0    0.30    1.70
  15 -14   0    2.30    2.40
  15 -15   0    1.80    2.50
  15 -15   0    0.90    2.10
  15 -16   0    1.40    2.20
  15 -16   0    3.40    2.60
  15 -17   0   -0.40    2.30
  15 -17   0    1.10    2.60
  16   0   0    5.80    1.80
 -16   0   0    6.90    1.40
 -16   0   0    6.60    2.00
  16   1   0   11.20    1.90
 -16   1   0   10.80    2.20
  16  -1   0   13.60    2.10
 -16  -1   0    9.40    2.10
 -16  -1   0   17.30    1.70
 -16   1   0   14.70    1.70
 -16   2   0    5.00    2.00
 -16  -2   0    3.70    1.90
  16  -2   0    4.90    1.90
  16   2   0    3.70    1.70
 -16  -2   0    6.80    1.40
 -16   3   0    1.80    2.00
  16  -3   0    0.10    1.80
 -16  -3   0   -0.20    1.80
  16   3   0    1.30    1.50
 -16  -3   0    4.00    1.50
  16  -4   0    2.00    1.90
 -16  -4   0    1.40    1.90
 -16   4   0    3.00    2.10
 -16   5   0   54.29    4.50
  16  -5   0   61.39    4.30
 -16  -5   0   59.89    4.10
  16  -6   0    6.80    2.20
 -16   6   0    9.10    2.30
 -16  -6   0    9.80    2.10
  16  -7   0   33.80    3.10
 -16   7   0   29.80    3.10
 -16  -7   0   29.80    2.80
 -16   8   0    6.50    2.40
 -16  -8   0    9.50    2.10
  16  -8   0    8.70    2.30
  16  -9   0   20.60    2.80
 -16   9   0   22.20    2.80
 -16  -9   0   21.60    2.50
 -16 -10   0   56.19    4.10
  16 -10   0   48.70    4.50
 -16  10   0   57.59    4.40
 -16 -11   0   29.20    2.60
  16 -11   0   23.50    3.10
 -16  11   0   26.20    3.00
 -16 -12   0   70.59    4.40
 -16  12   0   62.39    5.00
  16 -12   0   66.29    5.20
  16 -13   0   27.10    3.20
 -16 -13   0   26.50    2.60
  16 -14   0   91.69    6.00
  16 -15   0    7.90    2.30
  16 -15   0   11.00    2.70
  16 -16   0   85.29    6.30
  16 -16   0   94.69    5.80
  17   0   0   -0.80    1.70
 -17   0   0   -0.10    2.10
 -17   0   0    1.10    1.40
 -17   1   0    3.60    1.40
  17   1   0    2.20    1.80
  17  -1   0   -0.80    1.90
 -17   1   0   -2.20    2.10
 -17  -1   0    1.60    2.00
 -17  -1   0    3.90    1.50
 -17  -2   0    1.50    2.00
  17  -2   0    0.20    1.90
 -17  -2   0    0.30    1.40
 -17   2   0   -3.40    2.10
  17   2   0   -1.80    1.70
 -17  -3   0    1.60    2.10
 -17   3   0   -1.00    2.20
  17  -3   0    1.30    2.00
 -17  -3   0    1.60    1.50
 -17  -4   0    1.50    2.10
  17  -4   0   -3.00    1.90
 -17   4   0    1.20    2.20
 -17   5   0    7.10    2.30
  17  -5   0    2.80    2.10
 -17  -5   0    0.40    2.00
  17  -6   0   -1.30    2.10
 -17   6   0    3.30    2.30
 -17  -6   0    0.80    2.00
  17  -7   0    2.10    2.20
 -17  -7   0    5.30    2.20
 -17   7   0    6.60    2.50
 -17   8   0    5.30    2.40
  17  -8   0    4.50    2.30
 -17  -8   0    5.20    2.10
  17  -9   0    3.70    2.30
 -17   9   0    6.80    2.50
 -17  -9   0    3.40    2.10
 -17 -10   0    2.60    2.00
 -17  10   0    0.90    2.40
  17 -10   0    1.70    2.30
 -17  11   0   -2.40    2.30
 -17 -11   0   -1.30    1.90
  17 -11   0    0.00    2.40
  17 -12   0    2.20    2.60
 -17  12   0    0.50    2.40
 -17 -12   0    5.20    2.10
  17 -13   0    2.70    2.50
 -17 -13   0   -0.30    2.00
  17 -14   0    1.60    2.60
  17 -15   0    0.10    2.80
  17 -15   0    0.00    2.20
  17 -16   0    2.60    2.40
  17 -16   0    1.80    2.80
 -18   0   0   -2.00    2.20
  18   0   0    1.40    1.90
  18   1   0   23.60    2.40
 -18   1   0   21.20    2.80
  18  -1   0   19.80    2.60
 -18  -1   0   21.00    2.70
 -18  -2   0    8.10    2.30
  18  -2   0    8.30    2.20
 -18   2   0    4.90    2.40
  18  -3   0    6.80    2.30
 -18   3   0    1.80    2.40
 -18  -3   0    4.80    2.20
 -18  -4   0   17.30    2.60
  18  -4   0   15.70    2.50
 -18   4   0   13.10    2.70
 -18  -5   0   19.40    2.70
  18  -5   0   22.60    2.80
 -18   5   0   18.50    2.90
  18  -6   0   22.20    3.00
 -18   6   0   28.00    3.30
 -18  -6   0   29.30    3.00
 -18   7   0   -2.40    2.40
 -18  -7   0    5.40    2.20
  18  -7   0   -3.60    2.30
 -18   8   0   20.30    3.00
  18  -8   0   23.00    3.10
 -18  -8   0   25.20    2.80
 -18  -9   0    1.70    2.20
  18  -9   0    2.50    2.50
 -18   9   0    4.40    2.60
 -18  10   0   21.40    3.10
 -18 -10   0   22.30    2.70
  18 -10   0   22.30    3.10
 -18  11   0   20.90    3.20
  18 -11   0   26.10    3.40
 -18 -11   0   23.60    2.70
 -18  12   0   38.40    4.00
 -18 -12   0   42.60    3.80
  18 -12   0   40.90    4.10
 -18 -13   0   55.99    4.20
  18 -13   0   52.99    4.90
  18 -14   0   15.30    3.20
  18 -15   0   48.30    4.50
  19   0   0   -0.80    2.00
 -19   0   0   -1.20    2.40
 -19  -1   0   -0.60    2.40
 -19   1   0   -0.20    2.50
  19  -1   0    1.50    2.10
  19  -2   0    0.90    2.20
 -19  -2   0   -1.00    2.30
 -19   2   0    0.10    2.40
 -19  -3   0    2.80    2.30
  19  -3   0    0.40    2.20
 -19   3   0   -1.60    2.50
  19  -4   0    0.00    2.20
 -19  -4   0   -2.80    2.30
 -19   4   0    3.30    2.50
  19  -5   0   -4.10    2.20
 -19  -5   0   -5.40    2.30
 -19   5   0   -1.80    2.50
 -19  -6   0    1.00    2.30
 -19   6   0   -1.30    2.50
  19  -6   0    0.90    2.50
 -19   7   0   -0.70    2.60
  19  -7   0   -2.40    2.40
 -19  -7   0   -2.70    2.30
 -19  -8   0    1.30    2.40
 -19   8   0    1.60    2.60
  19  -8   0    6.00    2.60
 -19   9   0    2.60    2.60
  19  -9   0    4.30    2.60
 -19  10   0    3.10    2.80
  19 -10   0    6.70    2.80
  19 -11   0   -1.10    2.60
 -19 -11   0   -3.30    2.20
 -19  11   0   -3.10    2.60
 -19  12   0    0.70    2.70
  19 -12   0    1.80    2.70
 -19 -12   0    3.50    2.40
 -19 -13   0    3.60    2.30
  19 -13   0    2.20    2.80
  19 -14   0   -1.60    2.80
 -20   0   0   38.60    3.70
  20  -1   0   30.30    3.20
 -20  -1   0   35.40    3.50
 -20   1   0   32.10    3.50
 -20  -2   0   10.90    2.70
  20  -2   0   11.80    2.60
 -20   2   0   15.80    3.00
  20  -3   0   24.70    3.00
 -20   3   0   29.20    3.40
 -20  -3   0   30.60    3.30
 -20  -4   0   14.60    2.90
 -20   4   0   15.90    3.10
 -20  -5   0    9.80    2.70
  20  -5   0   11.00    2.70
 -20   5   0    7.30    2.90
 -20   6   0   12.80    3.10
  20  -6   0   15.20    2.90
 -20  -6   0   12.90    2.80
 -20  -7   0   17.90    2.90
 -20   7   0   19.40    3.20
 -20   8   0    1.10    2.80
  20  -8   0    2.40    2.60
 -20  -8   0   -0.70    2.40
 -20   9   0   13.20    3.20
 -20  -9   0   18.20    2.90
  20 -10   0    1.40    2.80
 -20  10   0    1.00    2.90
 -20  11   0   20.40    3.40
  20 -11   0   25.30    3.50
  20 -12   0   15.90    3.30
 -21   0   0   -4.20    2.70
 -21   1   0   -1.10    2.70
 -21  -1   0    0.30    2.70
 -21   2   0    0.10    2.70
 -21  -2   0    1.80    2.70
  21  -2   0    0.40    2.30
 -21   3   0    3.60    2.90
  21  -3   0    0.10    2.40
 -21  -3   0   -0.50    2.70
 -21   4   0    0.70    2.90
 -21  -4   0    1.10    2.70
 -21   5   0    1.50    2.90
 -21  -5   0    1.90    2.60
 -21  -6   0    0.80    2.70
 -21   6   0    1.30    3.00
 -21  -7   0   -2.00    2.50
 -21  -8   0   -1.00    2.60
  21  -8   0    1.40    2.70
 -21   8   0   -2.90    2.90
 -21  -9   0   -3.30    2.50
  21  -9   0    1.60    2.80
  21 -10   0    2.70    2.90
 -21  11   0    0.70    3.00
  21 -11   0    2.20    3.00
 -22   0   0   23.60    3.70
 -22   1   0   45.90    4.50
 -22  -1   0   49.70    4.50
 -22   2   0   10.20    3.20
 -22  -2   0   10.00    3.10
 -22   3   0   29.50    3.80
 -22  -3   0   25.50    3.60
 -22   4   0    3.30    3.10
 -22  -4   0    2.50    2.90
  22  -4   0    0.10    2.60
 -22   5   0   14.30    3.40
 -22  -5   0   13.70    3.20
 -22  -6   0    4.80    3.00
 -22   6   0    0.10    3.10
 -22   7   0   -2.00    3.10
 -22  -8   0   12.20    3.20
  22  -8   0    7.70    3.00
  22  -9   0    1.10    2.90
 -22  -9   0    0.40    2.80
  22 -10   0   13.00    3.40
 -23   0   0   -1.10    3.20
 -23  -1   0    0.40    3.10
 -23   1   0    1.10    3.20
 -23   2   0    0.30    3.20
 -23  -2   0   -3.60    2.90
 -23  -3   0    1.40    3.10
 -23   3   0    1.10    3.20
 -23  -4   0    2.60    3.10
 -23   4   0   -1.20    3.10
 -23  -5   0    1.20    3.10
  23  -5   0   -0.40    2.80
 -23   6   0    0.90    3.30
 -24   0   0   26.70    4.10
 -24   1   0   14.40    3.70
 -24  -1   0   13.70    3.60
 -24  -2   0   33.50    4.30
 -24   4   0   10.10    3.70
 -24  -4   0   11.90    3.50
   0   0  -1    0.10    0.20
   0   0   1    0.10    0.20
   0   0  -1    0.00    0.10
   0  -1   1   -1.60    0.10
   0  -1   1   -1.40    0.10
   0   1  -1   -1.30    0.10
   0   1  -1   -1.50    0.10
   0  -1  -1   -1.60    0.10
   0  -1   1   -1.60    0.10
   0  -2  -1  311.87   14.20
   0   2  -1  273.57   14.20
   0   2   1  311.97   14.20
   0   2   1  308.77   14.20
   0  -2   1  281.17   14.20
   0  -2   1  322.27   13.90
   0   3   1   -0.80    0.30
   0  -3   1   -0.80    0.30
   0  -3   1   -1.00    0.30
   0   3   1   -0.30    0.30
   0   3  -1   -0.60    0.30
   0  -3  -1   -0.60    0.40
   0   3  -1   -0.50    0.30
   0  -3  -1   -0.60    0.30
   0  -3   1   -0.90    0.40
   0  -4  -1  844.22   38.50
   0  -4  -1  817.52   39.40
   0  -4   1  827.12   39.40
   0   4  -1  890.01   39.40
   0   4   1  816.72   39.40
   0  -4   1  840.72   38.50
   0  -5   1   -0.30    0.50
   0   5   1   -0.70    0.40
   0  -5   1   -1.40    0.60
   0  -5   1   -1.00    0.40
   0  -5  -1   -0.50    0.10
   0   5  -1   -0.30    0.50
   0  -5  -1   -1.50    0.70
   0  -5  -1    0.50    0.50
   0   6  -1  446.46   21.00
   0  -6   1  429.76   21.00
   0  -6   1  436.96   20.50
   0  -6  -1  441.26   21.00
   0  -6  -1  469.45   20.60
   0   6   1  450.35   20.90
   0  -7  -1   -0.70    0.80
   0  -7  -1   -0.10    0.60
   0  -7   1    0.20    0.60
   0  -7  -1    0.00    0.10
   0   7  -1    0.00    0.60
   0  -7   1    0.00    0.80
   0  -7   1   -0.20    0.50
   0   8  -1   73.29    3.60
   0  -8  -1   60.09    3.60
   0  -8   1   79.99    3.80
   0  -8  -1   78.89    3.80
   0  -8   1   72.79    3.70
   0  -9  -1    0.00    0.10
   0   9  -1    0.10    0.70
   0  -9   1   -0.10    0.60
   0  -9   1    0.00    1.00
   0  -9   1   -1.90    0.80
   0  -9  -1   -0.80    1.00
   0  -9  -1   -0.70    0.70
   0 -10   1  560.84   26.30
   0 -10  -1  590.74   25.90
   0 -10  -1  578.84   26.30
   0 -10   1  559.14   25.80
   0  10  -1  505.35   26.30
   0  11  -1   -0.40    0.70
   0 -11   1    0.60    1.20
   0 -11  -1    0.10    1.20
   0 -11   1   -0.80    0.60
   0 -11   1    0.20    0.90
   0 -11  -1    0.00    0.10
   0 -11  -1    0.40    0.90
   0 -12   1   55.39    3.30
   0 -12   1   52.49    3.00
   0 -12  -1   53.29    3.00
   0 -12  -1   55.09    3.30
   0 -13   1   -1.10    1.30
   0 -13  -1   -0.80    1.40
   0 -13   1   -0.20    1.00
   0 -13  -1   -2.10    1.00
   0 -14   1   22.30    2.10
   0 -14   1   15.40    1.50
   0 -14  -1   17.90    1.50
   0 -14  -1   14.00    2.00
   0 -15  -1   -1.50    1.10
   0 -15   1   -0.30    1.20
   0 -15  -1   -2.20    1.70
   0 -15   1   -0.50    1.70
   0 -16   1   14.10    2.10
   0 -16  -1   11.40    2.20
   0 -16  -1   12.30    1.50
   0 -16   1   12.60    1.60
   0 -17   1    0.60    2.00
   0 -17   1   -0.80    1.30
   0 -17  -1    1.20    2.00
   0 -17  -1   -1.40    1.30
   0 -18   1   16.10    1.80
   0 -18   1   12.00    2.50
   0 -18  -1   15.00    1.70
   0 -18  -1   19.40    2.60
   0 -19   1   -4.00    2.30
   0 -19  -1    0.40    2.30
   0 -19  -1    1.10    1.40
   0 -19   1   -2.60    1.40
   0 -20  -1   12.70    1.80
   0 -20   1   18.90    2.90
   0 -20   1   13.40    1.90
   0 -20  -1   16.40    2.80
   0 -21   1   -2.30    2.70
   0 -21   1   -0.60    1.60
   0 -21  -1   -5.70    2.60
   0 -22   1   25.50    3.60
   0 -22  -1   20.70    3.50
  -1   0   1    0.00    0.10
  -1   0   1    0.00    0.10
  -1   0  -1    0.10    0.10
   1   0  -1    0.10    0.10
  -1   0  -1    0.00    0.10
   1   0  -1   -0.10    0.10
   1   0   1    0.00    0.10
   1   0   1    0.00    0.10
   1   1  -1   46.90    2.10
   1   1  -1   40.00    2.10
  -1   1   1   43.40    2.10
   1  -2  -1  104.39    5.20
   1  -2  -1   98.09    5.20
  -1   2  -1  106.69    5.20
  -1  -2   1  113.69    5.10
  -1   2  -1  110.49    5.20
   1   2  -1  125.09    5.20
   1  -2   1  120.69    5.10
   1  -2   1  107.99    5.20
   1  -2   1  106.09    5.20
  -1  -2  -1  117.49    5.10
  -1   2   1  107.49    5.20
  -1   2   1   96.09    5.20
  -1   3  -1  267.57   12.80
   1  -3  -1  262.27   12.80
   1  -3  -1  287.87   12.50
  -1  -3   1  300.57   12.80
   1  -3  -1  254.57   12.80
  -1  -3   1  266.77   12.50
  -1  -3  -1  265.77   12.50
   1   3  -1  279.97   12.80
   1   3  -1  287.97   12.80
   1  -3   1  264.47   12.80
   1  -3   1  260.67   12.80
  -1   3   1  262.37   12.80
   1  -3   1  271.67   12.50
   1  -4  -1   23.60    1.50
  -1  -4   1   28.80    1.60
   1  -4  -1   23.90    1.50
  -1   4  -1   27.00    1.50
  -1  -4   1   24.50    1.40
   1  -4  -1   27.00    1.60
   1   4  -1   26.10    1.40
  -1   4   1   25.80    1.50
   1  -4   1   24.60    1.50
  -1  -4  -1   26.30    1.60
   1  -4   1   26.50    1.50
   1  -5  -1  889.01   42.80
  -1   5  -1  903.01   42.80
   1  -5  -1  928.21   41.80
  -1  -5   1  934.41   42.70
   1  -5  -1  954.90   42.80
  -1  -5   1  889.31   41.70
  -1  -5  -1  900.71   41.80
   1  -5   1  883.51   42.80
  -1   5   1  907.81   42.80
   1  -5   1  921.61   42.80
   1   5  -1  910.91   42.70
   1  -5   1  911.01   41.70
  -1   6  -1    2.80    0.60
   1  -6  -1    3.00    0.80
   1  -6  -1    0.40    0.70
  -1  -6   1    2.20    0.80
  -1  -6   1    2.20    0.60
   1  -6  -1    0.80    0.60
   1  -6   1    1.80    0.70
  -1   6   1    2.00    0.60
   1  -6   1    1.50    0.70
  -1  -6  -1    3.00    0.80
   1  -6   1    2.60    0.70
   1  -7  -1  474.25   23.50
  -1  -7   1  515.75   23.00
   1  -7  -1  506.75   23.00
  -1  -7   1  508.65   23.50
   1  -7  -1  512.35   23.50
  -1   7  -1  501.45   23.50
   1  -7   1  514.95   23.50
  -1  -7  -1  500.45   23.50
   1  -7   1  514.85   23.00
   1  -7   1  475.85   23.50
  -1   7   1  479.25   23.50
  -1  -7  -1  489.95   23.00
  -1   8  -1   18.90    1.40
  -1  -8   1   18.50    1.70
   1  -8  -1   16.00    1.30
  -1  -8   1   16.20    1.30
   1  -8  -1   19.90    1.70
   1  -8  -1   19.50    1.50
   1  -8   1   15.90    1.40
   1  -8   1   18.30    1.40
  -1  -8  -1   17.40    1.20
   1  -8   1   17.60    1.60
  -1   8   1   18.20    1.30
  -1  -8  -1   22.50    1.70
  -1  -8  -1   18.20    1.20
   1  -9  -1  732.13   32.50
   1  -9  -1  663.63   32.50
   1  -9  -1  703.43   31.80
  -1  -9   1  689.13   31.80
  -1   9  -1  647.74   32.50
  -1  -9   1  692.13   32.50
   1  -9   1  698.33   32.50
  -1   9   1  670.33   32.50
  -1  -9  -1  722.93   32.50
  -1  -9  -1  719.73   31.80
   1  -9   1  639.24   32.50
   1  -9   1  710.13   31.80
  -1  -9  -1  692.63   32.50
  -1  10  -1  266.87   13.80
  -1 -10   1  289.97   13.80
  -1 -10   1  299.17   13.70
   1 -10  -1  271.07   13.90
   1 -10  -1  319.97   13.90
   1 -10  -1  313.77   13.70
   1 -10   1  294.27   13.70
  -1 -10  -1  304.47   13.70
   1 -10   1  302.87   13.90
  -1 -10  -1  295.67   13.80
  -1  10   1  272.67   13.80
  -1 -10  -1  291.47   13.80
   1 -10   1  268.97   13.90
  -1  11  -1  321.37   15.90
  -1 -11   1  356.06   15.80
   1 -11  -1  293.57   16.00
   1 -11  -1  356.26   15.80
  -1 -11   1  346.37   16.00
   1 -11  -1  363.46   16.00
  -1 -11  -1  345.77   15.90
  -1 -11  -1  315.37   15.90
   1 -11   1  350.06   15.80
  -1  11   1  306.67   15.90
   1 -11   1  317.37   16.00
   1 -11   1  357.26   16.00
  -1 -11  -1  349.27   15.80
  -1  12  -1   50.39    2.70
  -1 -12   1   52.19    2.80
   1 -12  -1   42.10    2.70
  -1 -12   1   51.59    3.10
   1 -12  -1   48.10    3.20
   1 -12  -1   52.69    2.90
   1 -12   1   52.69    2.90
  -1  12   1   45.60    2.70
  -1 -12  -1   44.20    2.70
  -1 -12  -1   55.79    3.20
   1 -12   1   45.10    2.80
   1 -12   1   52.99    3.10
  -1 -12  -1   49.40    2.70
   1 -13  -1  129.79    6.40
  -1 -13   1  116.09    6.20
   1 -13  -1  129.99    6.20
  -1 -13   1  125.19    6.40
   1 -13   1  118.59    6.20
  -1 -13  -1  125.79    6.10
   1 -13   1  128.19    6.40
  -1 -13  -1  124.29    6.40
  -1 -14   1   24.00    2.10
   1 -14  -1   25.10    2.30
   1 -14  -1   30.50    2.20
  -1 -14   1   25.00    2.30
   1 -14   1   29.40    2.20
   1 -14   1   30.80    2.70
  -1 -14  -1   25.50    2.00
  -1 -14  -1   26.40    2.40
   1 -15  -1   36.50    2.60
  -1 -15   1   36.20    3.20
  -1 -15   1   31.80    2.40
   1 -15  -1   31.10    2.70
   1 -15   1   33.20    3.00
   1 -15   1   34.30    2.60
  -1 -15  -1   31.90    2.40
  -1 -15  -1   39.90    3.20
   1 -16  -1    2.60    1.90
   1 -16  -1    0.00    1.30
  -1 -16   1    2.50    1.20
  -1 -16   1    4.00    2.00
  -1 -16  -1    2.20    1.20
   1 -16   1    5.20    1.90
  -1 -16  -1   -1.10    1.90
   1 -16   1    2.60    1.40
  -1 -17   1   10.20    2.20
  -1 -17   1    9.60    1.50
   1 -17  -1   10.40    1.60
   1 -17  -1    7.90    2.20
   1 -17   1   12.70    1.70
  -1 -17  -1   11.60    2.20
  -1 -17  -1    8.50    1.40
   1 -17   1   13.70    2.30
   1 -18  -1    2.80    2.20
   1 -18  -1    7.20    1.50
  -1 -18   1    4.10    1.40
  -1 -18   1    1.80    2.20
  -1 -18  -1    3.80    1.30
   1 -18   1    5.20    1.60
   1 -18   1    6.00    2.20
  -1 -18  -1    1.90    2.20
  -1 -19   1    5.20    1.50
   1 -19  -1    3.30    1.50
  -1 -19   1    6.10    2.40
   1 -19  -1   -0.20    2.20
   1 -19   1    4.50    2.40
   1 -19   1    3.00    1.60
  -1 -19  -1    6.20    2.50
   1 -20  -1    1.30    1.50
  -1 -20   1    1.70    2.60
  -1 -20   1    0.70    1.40
   1 -20  -1    2.80    2.50
  -1 -20  -1    4.00    2.60
   1 -20   1    1.20    1.60
   1 -20   1    1.60    2.50
   1 -21  -1    4.90    1.70
  -1 -21   1    6.70    2.80
   1 -21  -1    6.80    2.80
   1 -21   1    4.10    2.80
   1 -21   1    3.60    1.80
  -1 -21  -1    8.90    2.90
   1 -22  -1    6.20    3.10
  -1 -22   1    9.50    3.10
   1 -22   1    9.20    3.00
  -1 -22  -1    7.10    3.10
   1 -22   1    6.40    1.90
  -2   0  -1   -0.70    0.20
  -2   0  -1   -0.30    0.20
   2   0  -1   -0.20    0.20
   2   0  -1   -0.10    0.20
  -2   0   1   -0.30    0.20
   2   0   1   -0.50    0.20
   2   0   1   -0.30    0.20
  -2   0   1   -0.50    0.20
   2   1   1   45.30    2.00
  -2  -1   1   38.40    2.00
   2  -1   1   36.70    2.10
  -2   1   1   42.30    2.10
  -2   2  -1   68.59    3.50
  -2  -2   1   79.89    3.50
   2  -2  -1   67.79    3.50
   2  -2  -1   65.69    3.50
  -2  -2   1   74.89    3.50
   2   2  -1   74.89    3.50
   2   2  -1   80.69    3.50
  -2   2   1   68.09    3.50
   2  -2   1   65.19    3.50
   2   2  -1   78.09    3.60
   2  -2   1   65.59    3.50
  -2  -2  -1   79.69    3.50
  -2   3  -1  112.29    5.20
   2  -3  -1  103.59    5.10
   2  -3  -1  100.29    5.10
  -2  -3   1  110.49    5.00
   2  -3   1   98.09    5.10
  -2  -3  -1  112.79    5.00
   2   3  -1  113.09    5.10
   2  -3   1   97.09    5.10
  -2   3   1  108.69    5.10
   2  -4  -1  104.79    5.20
  -2  -4   1  118.89    5.20
  -2  -4   1  107.99    5.20
   2  -4  -1  103.89    5.20
  -2   4  -1  108.49    5.30
  -2   4   1  111.29    5.30
   2  -4   1  112.39    5.10
   2  -4   1  103.19    5.30
   2  -4   1  102.89    5.30
  -2  -4  -1  106.39    5.20
   2  -5  -1  167.98    7.40
  -2  -5   1  177.18    7.50
  -2   5  -1  159.68    7.60
   2  -5  -1  156.58    7.60
   2  -5  -1  143.39    7.60
  -2  -5   1  160.98    7.50
  -2   5   1  160.48    7.60
   2  -5   1  152.38    7.60
   2  -5   1  138.59    7.60
   2  -5   1  160.98    7.40
  -2  -5  -1  165.68    7.50
  -2  -6   1  213.88   10.70
   2  -6  -1  235.98   10.60
  -2  -6   1  239.08   10.60
  -2   6  -1  233.48   10.80
   2  -6  -1  224.68   10.80
   2  -6  -1  215.48   10.80
  -2   6   1  226.68   10.80
   2  -6   1  233.48   10.80
   2  -6   1  219.08   10.80
  -2  -6  -1  221.18   10.60
   2  -6   1  237.68   10.60
   2  -7  -1    6.00    0.90
  -2  -7   1    7.80    0.70
   2  -7  -1    3.70    0.80
   2  -7  -1    3.40    0.80
  -2  -7   1    9.30    0.80
  -2  -7   1    9.00    1.00
  -2   7  -1    6.70    0.80
   2  -7   1    5.30    0.80
  -2  -7  -1    8.70    1.00
   2  -7   1    4.20    0.90
   2  -7   1    6.50    0.90
  -2   7   1    4.80    0.80
   2  -8  -1   10.00    1.10
   2  -8  -1   11.40    1.10
  -2  -8   1   12.70    1.10
  -2   8  -1   12.20    1.10
  -2  -8   1   13.10    1.00
   2  -8  -1   14.10    1.30
  -2  -8   1   11.40    1.20
  -2  -8  -1   11.50    1.30
   2  -8   1    9.30    1.10
   2  -8   1   11.30    1.20
  -2   8   1   13.30    1.10
   2  -8   1   12.80    1.20
  -2   9  -1  143.89    7.00
   2  -9  -1  155.48    7.00
   2  -9  -1  125.49    7.00
  -2  -9   1  155.98    7.00
  -2  -9   1  133.79    6.90
   2  -9  -1  151.08    7.10
  -2  -9   1  148.09    7.00
   2  -9   1  150.18    7.00
  -2  -9  -1  152.78    7.00
  -2   9   1  144.69    7.00
   2  -9   1  134.09    7.10
   2  -9   1  146.39    7.10
  -2  10  -1    2.60    0.80
   2 -10  -1    4.50    1.00
  -2 -10   1    3.20    1.20
   2 -10  -1    1.70    1.10
   2 -10  -1    2.00    0.90
  -2 -10   1    0.10    0.70
  -2 -10   1    0.20    0.70
   2 -10   1    1.30    1.10
   2 -10   1    5.60    1.00
  -2  10   1    2.40    0.80
   2 -10   1    2.70    0.90
  -2 -10  -1    3.40    1.20
   2 -11  -1   71.19    3.90
  -2 -11   1   78.19    4.00
   2 -11  -1   86.09    3.90
  -2 -11   1   64.59    3.70
   2 -11  -1   77.99    4.10
  -2  11  -1   71.79    3.80
  -2 -11   1   70.39    3.70
  -2  11   1   71.29    3.80
   2 -11   1   77.99    3.90
   2 -11   1   74.19    4.00
  -2 -11  -1   75.19    4.10
   2 -11   1   66.69    3.90
  -2 -12   1   -0.70    0.90
  -2 -12   1    0.70    1.30
   2 -12  -1   -0.40    1.30
  -2 -12   1    0.10    0.80
   2 -12  -1    0.20    1.10
  -2  12  -1    2.20    0.90
   2 -12   1    0.90    1.10
  -2 -12  -1   -0.60    1.30
  -2  12   1    1.50    0.80
   2 -12   1    0.90    1.30
  -2 -13   1    9.40    1.70
  -2 -13   1    6.40    1.10
   2 -13  -1    8.30    1.60
   2 -13  -1   10.30    1.30
   2 -13   1    8.50    1.60
   2 -13   1   10.80    1.40
  -2 -13  -1   10.40    1.70
  -2 -14   1    2.20    1.60
   2 -14  -1    0.00    1.50
  -2 -14   1    0.30    1.00
   2 -14  -1    0.00    1.20
  -2 -14  -1    0.20    1.60
   2 -14   1    1.00    1.50
   2 -14   1    1.40    1.20
   2 -15  -1    4.90    1.80
  -2 -15   1    4.00    1.20
  -2 -15   1    4.80    1.80
   2 -15  -1    8.00    1.40
  -2 -15  -1    5.30    1.80
   2 -15   1    2.10    1.80
   2 -15   1    5.20    1.40
   2 -16  -1    2.90    1.90
  -2 -16   1    3.10    2.00
   2 -16  -1    0.90    1.40
   2 -16   1    3.80    1.50
  -2 -16  -1    0.90    1.90
   2 -16   1    0.50    1.90
   2 -17  -1   15.10    2.40
  -2 -17   1   17.60    2.40
   2 -17  -1   19.90    1.90
  -2 -17   1   14.10    1.60
  -2 -17  -1   17.30    2.40
   2 -17   1   12.60    2.30
   2 -17   1   13.30    1.80
   2 -18  -1    1.80    1.50
  -2 -18   1   -3.10    2.10
   2 -18  -1   -1.80    2.10
   2 -18   1   -0.70    2.10
   2 -18   1    3.20    1.60
  -2 -18  -1    3.10    2.20
   2 -19  -1   12.20    1.80
   2 -19  -1   13.40    2.70
  -2 -19   1    9.20    2.60
  -2 -19  -1   12.80    2.60
   2 -19   1   13.50    2.60
   2 -19   1    9.60    1.90
   2 -20  -1   -0.30    2.50
  -2 -20   1    1.00    2.50
   2 -20  -1   -0.60    1.70
   2 -20   1    0.30    1.70
  -2 -20  -1   -1.50    2.50
   2 -20   1    0.20    2.50
  -2 -21   1   10.80    2.90
   2 -21  -1   15.70    2.10
   2 -21  -1   10.50    2.90
  -2 -21  -1   17.50    3.20
   2 -21   1   13.40    3.00
   2 -21   1   15.80    2.20
  -2 -22   1   -3.60    2.90
   2 -22  -1   -0.50    2.90
   2 -22  -1    2.50    1.80
   2 -22   1   -0.20    1.80
   2 -22   1   -3.40    2.80
  -2 -22  -1   -2.60    2.80
  -3   0  -1    0.50    0.40
  -3   0  -1   -0.10    0.40
   3   0   1    0.90    0.40
   3   0  -1    1.10    0.40
  -3   0   1    0.80    0.40
  -3   0   1    1.40    0.40
  -3  -1   1   10.90    0.80
   3   1   1   11.00    0.80
   3  -1  -1   10.60    0.90
  -3   1  -1   10.30    0.80
  -3  -1   1   12.90    0.80
   3  -1  -1    8.90    0.80
  -3   1  -1   11.40    0.90
   3   1  -1   11.20    0.80
  -3  -1  -1   10.50    0.80
  -3  -1  -1   11.20    0.80
  -3  -1  -1   14.00    0.70
   3  -1   1    9.50    0.80
  -3   1   1   11.30    0.90
  -3   1   1    9.80    0.80
  -3  -2   1   79.89    3.60
  -3  -2   1   72.99    3.60
   3  -2  -1   71.59    3.70
   3  -2  -1   62.89    3.60
  -3  -2   1   78.19    3.70
  -3   2  -1   78.29    3.70
   3   2   1   71.19    3.60
   3  -2   1   74.39    3.70
   3   2  -1   74.89    3.60
  -3   2   1   70.79    3.70
  -3  -2  -1   68.29    3.60
  -3  -2  -1   82.59    3.60
  -3  -3   1    4.50    0.50
   3  -3  -1    4.70    0.80
   3  -3  -1    3.60    0.80
  -3   3  -1    3.60    0.80
  -3  -3   1    4.10    0.70
  -3   3   1    3.60    0.80
   3  -3   1    1.80    0.80
  -3  -3  -1    2.50    0.70
   3   3  -1    2.90    0.50
   3  -4  -1  338.27   16.60
   3  -4  -1  351.36   16.60
  -3   4  -1  373.16   16.60
  -3  -4   1  352.86   16.20
  -3  -4   1  342.77   16.50
  -3   4   1  363.16   16.60
   3  -4   1  333.17   16.60
  -3  -4  -1  356.06   16.20
  -3  -5   1    4.00    0.80
   3  -5  -1    3.10    0.80
  -3  -5   1    4.40    0.50
  -3   5  -1    4.90    0.80
   3  -5  -1    4.10    0.80
  -3  -5  -1    4.30    0.80
   3  -5   1    4.70    0.70
  -3   5   1    3.60    0.80
   3  -5   1    3.80    0.80
  -3  -6   1  211.48    9.90
   3  -6  -1  216.08    9.90
   3  -6  -1  208.78   10.10
   3  -6  -1  198.78   10.10
  -3   6  -1  217.58   10.20
  -3   6   1  218.88   10.20
   3  -6   1  216.98    9.90
   3  -6   1  211.68   10.20
  -3  -6  -1  209.28    9.90
   3  -7  -1   35.60    2.10
   3  -7  -1   32.80    2.10
  -3   7  -1   34.70    2.10
  -3  -7   1   36.90    2.20
   3  -7  -1   34.30    2.10
   3  -7   1   34.40    2.10
  -3  -7  -1   33.60    2.20
   3  -7   1   34.50    2.20
  -3   7   1   36.70    2.10
   3  -8  -1  546.25   24.70
  -3   8  -1  520.65   24.70
   3  -8  -1  485.15   24.70
  -3  -8   1  526.25   24.10
  -3  -8   1  493.95   24.50
   3  -8  -1  539.15   24.10
   3  -8   1  532.75   24.70
  -3  -8  -1  537.25   24.10
   3  -8   1  525.65   24.10
  -3   8   1  515.55   24.60
  -3   9  -1  270.97   13.20
   3  -9  -1  292.97   13.20
   3  -9  -1  285.37   13.00
   3  -9  -1  259.47   13.20
  -3  -9   1  274.27   13.00
   3  -9   1  275.57   13.00
  -3  -9  -1  278.27   13.00
  -3   9   1  275.17   13.20
   3  -9   1  280.27   13.20
  -3  10  -1  190.68    9.70
  -3 -10   1  209.88    9.60
  -3 -10   1  181.78    9.60
   3 -10  -1  223.38    9.80
   3 -10  -1  208.38    9.60
   3 -10  -1  183.38    9.70
   3 -10   1  207.28    9.70
   3 -10   1  206.48    9.60
  -3  10   1  196.08    9.70
  -3 -10  -1  207.18    9.60
  -3 -11   1  262.87   12.30
   3 -11  -1  280.87   12.50
   3 -11  -1  266.87   12.30
  -3  11  -1  250.17   12.40
  -3 -11   1  265.07   12.30
  -3 -11   1  233.08   12.30
   3 -11  -1  238.98   12.40
   3 -11   1  269.47   12.20
  -3 -11  -1  265.27   12.30
  -3  11   1  248.78   12.40
   3 -11   1  268.67   12.40
  -3 -12   1  133.69    6.40
  -3 -12   1  138.79    6.60
   3 -12  -1  132.49    6.60
  -3  12  -1  124.59    6.50
   3 -12  -1  132.29    6.60
  -3  12   1  114.79    6.40
   3 -12   1  136.49    6.60
  -3 -12  -1  134.09    6.60
   3 -12   1  133.29    6.60
   3 -13  -1   62.79    3.80
  -3 -13   1   60.89    3.90
  -3  13  -1   55.59    3.60
   3 -13  -1   71.29    3.70
   3 -13   1   62.19    3.80
   3 -13   1   65.99    3.70
  -3 -13  -1   67.49    3.90
   3 -14  -1   85.79    4.70
  -3 -14   1   84.29    4.90
   3 -14  -1   88.69    4.90
   3 -14   1   83.19    4.70
   3 -14   1   82.69    4.80
  -3 -14  -1   90.29    5.00
   3 -15  -1   17.60    1.80
  -3 -15   1   17.20    2.20
   3 -15  -1   11.30    2.00
   3 -15   1   10.90    1.70
  -3 -15  -1   12.10    2.10
   3 -15   1   14.60    2.00
  -3 -16   1   15.50    2.30
   3 -16  -1   15.80    2.20
   3 -16  -1   19.50    1.90
   3 -16   1   16.90    2.20
  -3 -16  -1   11.40    2.30
   3 -16   1   15.50    1.90
  -3 -17   1    2.20    2.00
   3 -17  -1    3.40    1.60
   3 -17  -1    2.80    2.00
  -3 -17  -1    2.00    2.00
   3 -17   1    0.80    1.60
   3 -17   1    5.30    2.10
   3 -18  -1   12.80    2.50
   3 -18  -1   13.60    1.90
  -3 -18   1   15.00    2.60
  -3 -18  -1   12.60    2.50
   3 -18   1   12.60    1.90
   3 -18   1   14.90    2.50
   3 -19  -1   -0.10    2.30
   3 -19  -1    2.90    1.70
  -3 -19   1    3.40    2.40
   3 -19   1    4.20    2.40
  -3 -19  -1   -1.00    2.40
   3 -19   1    3.20    1.80
   3 -20  -1    4.70    2.50
   3 -20  -1    1.70    1.80
  -3 -20   1    3.20    2.50
   3 -20   1    1.00    1.80
  -3 -20  -1    4.60    2.60
   3 -20   1    5.00    2.50
   3 -21  -1    3.20    1.90
  -3 -21   1   10.50    2.90
   3 -21  -1    6.10    2.90
   3 -21   1    3.80    2.70
   3 -21   1    6.20    2.00
  -3 -21  -1    2.30    2.90
  -3 -22   1    1.30    2.90
   3 -22  -1    0.00    1.90
   3 -22  -1    3.90    3.00
  -3 -22  -1    0.60    3.00
   3 -22   1    3.60    2.00
   3 -22   1    2.90    2.90
  -4   0  -1   14.90    1.30
   4   0  -1   20.50    1.30
  -4   0   1   15.70    1.30
   4   0   1   14.40    1.30
  -4   0   1   18.80    1.30
   4   1   1   13.80    1.20
  -4  -1   1   16.10    1.20
  -4  -1   1   12.60    1.10
  -4   1  -1   14.70    1.20
   4  -1  -1   16.70    1.30
  -4  -1  -1   11.80    1.10
  -4  -1  -1   20.00    1.10
  -4   1   1   17.80    1.30
  -4  -1  -1   14.50    1.10
   4   1  -1   17.20    1.20
   4  -1   1   14.60    1.10
  -4   2  -1  256.17   12.20
  -4  -2   1  237.88   12.10
   4  -2  -1  268.17   12.20
  -4  -2   1  284.47   12.40
   4   2   1  256.37   12.10
  -4  -2   1  272.97   12.10
  -4  -2  -1  244.68   12.10
   4  -2   1  222.28   12.20
  -4   2   1  272.97   12.20
   4   2  -1  245.48   12.10
   4   3   1  161.88    7.60
  -4  -3   1  168.88    7.70
   4  -3  -1  163.18    7.80
  -4  -3   1  142.19    7.60
  -4  -3   1  166.98    7.60
  -4   3  -1  164.28    7.80
  -4  -3  -1  178.28    7.60
  -4   3   1  166.68    7.80
   4  -3   1  155.58    7.80
   4   3  -1  160.48    7.70
  -4  -3  -1  144.29    7.60
  -4  -4   1   92.39    4.40
  -4  -4   1   93.89    4.30
   4  -4  -1   86.09    4.50
  -4   4  -1   89.59    4.50
   4   4  -1   88.89    4.30
  -4   4   1   85.39    4.50
   4  -4   1   83.29    4.50
  -4  -4  -1   92.59    4.30
  -4  -5   1  166.38    7.90
  -4  -5   1  168.98    7.90
   4  -5  -1  159.88    8.10
  -4   5  -1  169.08    8.10
   4  -5   1  166.88    8.10
  -4  -5  -1  172.08    7.90
  -4   5   1  167.58    8.10
  -4  -6   1   18.90    1.20
  -4  -6   1   21.40    1.60
  -4   6  -1   17.40    1.70
  -4  -6   1   26.00    1.30
   4  -6  -1   16.60    1.70
  -4  -6  -1   25.30    1.70
  -4   6   1   21.00    1.70
   4  -7  -1   42.10    2.60
  -4  -7   1   41.80    2.50
  -4   7  -1   43.90    2.50
   4  -7   1   42.80    2.50
  -4   7   1   41.50    2.50
   4  -7   1   46.00    2.40
  -4  -7  -1   41.50    2.50
   4  -8  -1   77.09    4.20
   4  -8  -1   79.89    4.10
  -4  -8   1   85.39    4.20
  -4   8  -1   86.19    4.20
   4  -8   1   80.19    4.20
  -4  -8  -1   77.99    4.20
  -4   8   1   78.89    4.20
   4  -8   1   80.59    4.10
  -4   9  -1    6.20    1.00
   4  -9  -1    6.40    1.10
   4  -9  -1    5.50    1.10
  -4  -9   1    5.50    1.20
  -4   9   1    5.80    1.00
   4  -9   1    5.00    1.10
   4  -9   1    5.20    1.10
  -4  -9  -1    6.80    1.20
   4 -10  -1   43.90    2.60
  -4  10  -1   39.30    2.50
   4 -10  -1   34.60    2.50
  -4 -10   1   38.10    2.60
  -4 -10  -1   37.50    2.60
   4 -10   1   38.90    2.60
   4 -10   1   35.70    2.50
  -4  10   1   38.00    2.40
  -4 -11   1   26.40    2.30
   4 -11  -1   26.50    2.20
   4 -11  -1   25.30    2.00
  -4  11  -1   25.00    2.00
   4 -11   1   27.30    2.20
   4 -11   1   27.50    2.20
  -4 -11  -1   25.40    2.30
  -4  11   1   21.60    2.00
   4 -12  -1   41.70    2.70
   4 -12  -1   41.50    2.90
  -4  12  -1   37.50    2.60
  -4 -12   1   41.30    3.00
  -4  12   1   40.20    2.60
   4 -12   1   45.20    2.80
   4 -12   1   36.00    2.80
  -4 -12  -1   40.90    2.90
   4 -13  -1    3.20    1.30
  -4  13  -1    2.00    1.10
   4 -13  -1    3.30    1.50
  -4 -13   1    1.30    1.50
   4 -13   1    2.50    1.30
   4 -13   1    3.70    1.40
  -4 -13  -1   -0.70    1.50
   4 -14  -1    6.60    1.70
  -4 -14   1    4.30    1.70
   4 -14  -1    6.20    1.50
   4 -14   1    3.00    1.60
  -4 -14  -1    3.10    1.70
   4 -14   1    4.10    1.50
   4 -15  -1    1.00    1.80
  -4 -15   1    3.00    1.80
   4 -15  -1   -1.90    1.40
  -4 -15  -1   -0.60    1.80
   4 -15   1   -2.40    1.70
   4 -15   1    3.40    1.60
   4 -16  -1   12.90    2.10
  -4 -16   1   12.40    2.20
   4 -16  -1    7.80    1.70
   4 -16   1    6.80    2.00
  -4 -16  -1    9.40    2.20
   4 -16   1   10.40    1.70
   4 -17  -1    1.80    1.70
   4 -17  -1    1.40    2.00
  -4 -17   1    3.20    2.10
  -4 -17  -1    5.10    2.10
   4 -17   1    1.20    2.00
   4 -17   1    3.50    1.70
   4 -18  -1   15.70    2.60
   4 -18  -1   13.20    2.00
  -4 -18   1   19.20    2.70
  -4 -18  -1   16.70    2.60
   4 -18   1   10.50    2.00
   4 -18   1   11.60    2.40
   4 -19  -1    5.80    2.40
  -4 -19   1    5.30    2.50
   4 -19  -1    3.10    1.90
   4 -19   1    5.50    2.40
   4 -19   1    2.40    1.80
  -4 -19  -1    2.30    2.50
   4 -20  -1   15.10    2.20
   4 -20  -1   10.80    2.80
  -4 -20   1   13.70    2.90
   4 -20   1   14.10    2.20
  -4 -20  -1   12.40    2.80
   4 -20   1   12.90    2.70
   4 -21  -1    1.50    1.90
   4 -21  -1   -0.50    2.70
  -4 -21   1   -1.30    2.70
   4 -21   1    2.90    2.00
  -4 -21  -1    7.70    3.00
   4 -21   1    3.90    2.80
  -4 -22   1   17.10    3.40
  -4 -22  -1   11.80    3.30
   5   0   1    4.80    0.90
  -5   0   1    1.00    0.80
   5   0  -1    3.70    0.80
  -5   0  -1    3.60    0.80
  -5  -1   1   28.20    1.70
   5   1   1   25.80    1.70
   5  -1  -1   26.30    1.80
  -5  -1   1   26.30    1.60
  -5   1  -1   28.20    1.80
  -5  -1   1   29.10    1.60
  -5  -1  -1   25.30    1.70
   5  -1   1   27.70    1.80
   5   1  -1   26.70    1.70
  -5  -1  -1   24.60    1.60
  -5   1   1   25.80    1.80
  -5  -1  -1   27.30    1.60
  -5  -2   1  421.76   21.10
  -5  -2   1  464.75   21.60
   5   2   1  467.05   21.10
  -5  -2   1  458.45   21.10
  -5   2  -1  465.25   21.20
   5  -2  -1  440.36   21.10
  -5  -2  -1  425.76   21.10
   5  -2   1  464.05   21.20
  -5   2   1  444.26   21.20
   5   2  -1  461.35   21.10
  -5  -2  -1  412.66   21.10
  -5  -3   1   58.29    3.10
  -5  -3   1   71.59    3.30
  -5  -3   1   65.89    3.10
  -5   3  -1   62.29    3.30
   5   3   1   57.39    3.10
   5  -3  -1   59.59    3.30
   5   3  -1   64.19    3.10
   5  -3   1   62.99    3.30
  -5   3   1   54.49    3.30
  -5  -3  -1   70.69    3.10
  -5  -3  -1   51.59    3.10
  -5  -4   1    1.90    0.50
   5   4   1    1.60    0.50
  -5  -4   1    2.70    0.80
  -5   4  -1    1.80    0.90
  -5  -4   1    2.00    0.70
   5  -4  -1    3.20    0.90
  -5  -4  -1    2.60    0.80
  -5  -4  -1    1.90    0.60
   5   4  -1    2.00    0.60
  -5   4   1    2.20    0.90
   5  -4   1    1.40    0.90
  -5   5  -1  325.47   15.70
  -5  -5   1  331.87   15.30
  -5  -5   1  328.27   15.50
   5  -5  -1  335.37   15.70
   5   5  -1  323.37   15.50
  -5   5   1  333.17   15.70
   5  -5   1  325.77   15.70
  -5  -5  -1  329.67   15.30
  -5  -6   1   14.70    1.20
   5  -6  -1   17.30    1.40
  -5   6  -1   17.70    1.60
  -5  -6   1   16.80    1.40
   5  -6   1   17.50    1.40
  -5   6   1   16.70    1.60
  -5  -6  -1   18.00    1.40
  -5   7  -1  783.42   36.90
  -5  -7   1  795.52   36.00
   5  -7  -1  765.22   36.80
   5  -7   1  795.92   36.90
  -5   7   1  786.52   36.80
  -5  -7  -1  763.02   36.00
   5  -8  -1   54.09    3.10
  -5   8  -1   52.39    3.10
  -5  -8   1   57.19    3.10
  -5   8   1   54.99    3.20
   5  -8   1   54.69    3.20
   5  -8   1   56.99    3.00
  -5  -8  -1   53.29    3.10
   5  -9  -1  212.08    9.80
   5  -9  -1  205.78    9.50
  -5   9  -1  196.78    9.70
  -5  -9   1  200.08    9.60
   5  -9   1  197.08    9.70
  -5   9   1  197.08    9.70
  -5  -9  -1  203.08    9.60
   5  -9   1  188.68    9.50
   5 -10  -1   88.99    4.60
  -5 -10   1   87.59    4.70
   5 -10  -1   91.59    4.70
  -5  10  -1   86.19    4.60
  -5  10   1   85.69    4.60
   5 -10   1   89.49    4.70
  -5 -10  -1   88.49    4.70
   5 -10   1   87.89    4.50
   5 -11  -1  156.38    7.70
  -5 -11   1  155.98    7.70
  -5  11  -1  153.98    7.80
   5 -11  -1  157.28    7.80
  -5 -11  -1  153.88    7.70
   5 -11   1  156.98    7.60
  -5  11   1  154.38    7.80
   5 -11   1  164.38    7.80
   5 -12  -1  134.19    6.90
   5 -12  -1  145.89    7.00
  -5  12  -1  132.79    6.90
  -5 -12   1  148.69    7.00
   5 -12   1  139.69    7.00
  -5  12   1  131.39    6.90
  -5 -12  -1  133.89    6.90
   5 -12   1  133.39    6.80
   5 -13  -1   98.79    5.10
   5 -13  -1   99.89    5.10
  -5  13  -1   80.99    4.90
  -5 -13   1   94.39    5.10
   5 -13   1   91.89    5.10
   5 -13   1   92.19    5.10
  -5 -13  -1   99.39    5.20
   5 -14  -1   22.40    2.00
   5 -14  -1   21.20    2.20
  -5 -14   1   20.10    2.20
  -5 -14  -1   22.50    2.30
   5 -14   1   18.10    2.00
   5 -14   1   14.90    2.00
  -5 -15   1   55.99    4.00
   5 -15  -1   59.29    3.80
   5 -15  -1   62.99    4.00
   5 -15   1   53.29    3.80
  -5 -15  -1   55.59    4.00
   5 -15   1   56.49    3.80
   5 -16  -1    9.10    2.10
   5 -16  -1    6.20    1.80
  -5 -16   1    6.70    2.10
   5 -16   1   11.00    2.10
  -5 -16  -1    9.60    2.20
   5 -16   1    9.90    1.80
   5 -17  -1   10.40    2.20
   5 -17  -1   10.10    2.00
  -5 -17   1   10.50    2.20
   5 -17   1    7.90    2.10
   5 -17   1    8.20    1.90
  -5 -17  -1   11.40    2.30
  -5 -18   1    7.20    2.30
   5 -18  -1    2.80    2.20
   5 -18  -1    2.50    1.80
   5 -18   1    5.60    1.90
   5 -18   1    3.30    2.20
  -5 -18  -1    1.60    2.30
   5 -19  -1    5.20    2.40
   5 -19  -1    7.10    2.00
  -5 -19   1    4.30    2.50
   5 -19   1    3.90    2.30
   5 -19   1    5.80    2.00
  -5 -19  -1    5.10    2.60
  -5 -20   1    9.60    2.80
   5 -20  -1    4.80    2.60
   5 -20  -1    3.50    2.00
  -5 -20  -1   11.00    2.80
   5 -20   1    8.40    2.20
   5 -20   1    4.40    2.60
   5 -21  -1    8.20    2.90
   5 -21  -1    5.90    2.20
  -5 -21   1    7.40    2.80
  -5 -21  -1    5.70    2.90
   5 -21   1   -1.90    2.60
   5 -21   1    4.10    2.20
  -6   0  -1    0.30    0.80
   6   0  -1    0.90    0.80
   6   0   1   -0.50    0.80
  -6   0   1    0.50    0.80
  -6   1  -1   23.00    1.70
   6   1   1   19.70    1.60
  -6  -1   1   22.00    1.60
  -6  -1   1   24.90    1.50
   6  -1  -1   22.80    1.70
   6   1  -1   22.80    1.60
   6  -1   1   21.80    1.70
  -6  -1  -1   21.00    1.60
  -6   1   1   24.10    1.70
  -6  -1  -1   23.00    1.40
   6  -2  -1    7.30    1.10
  -6   2  -1    8.30    1.10
  -6  -2   1    6.80    0.90
  -6  -2   1    7.70    0.90
   6   2   1    7.40    0.90
  -6  -2   1   13.40    1.10
   6   2  -1    8.30    0.90
  -6  -2  -1   10.40    0.90
  -6  -2  -1    7.10    0.80
   6  -2   1    8.20    1.10
  -6  -2  -1    7.60    0.90
  -6   2   1    8.90    1.10
  -6   3  -1   26.70    1.90
  -6  -3   1   24.40    1.60
   6   3   1   22.10    1.60
   6  -3  -1   25.90    1.80
  -6   3   1   33.70    2.00
  -6  -3  -1   25.20    1.60
   6   3  -1   25.50    1.60
  -6  -3  -1   21.80    1.70
   6  -3   1   25.00    1.90
  -6  -4   1    7.80    0.80
  -6  -4   1    8.90    0.90
   6  -4  -1    5.80    1.10
  -6   4  -1    8.90    1.10
   6   4   1    8.30    0.80
  -6   4   1    6.90    1.10
   6   4  -1    8.70    0.80
  -6  -4  -1    4.50    0.70
   6  -4   1    4.10    1.10
  -6  -4  -1    9.60    1.00
  -6  -4  -1    4.30    0.80
   6  -5  -1    6.60    1.10
  -6   5  -1    6.30    1.10
  -6  -5   1    8.70    0.90
  -6  -5   1    3.70    0.60
  -6  -5   1   11.10    1.00
  -6  -5  -1   11.90    1.10
  -6   5   1    7.10    1.10
   6   5  -1    7.20    0.70
   6  -5   1    5.40    1.10
  -6  -6   1   11.00    1.20
  -6  -6   1   12.10    1.00
  -6   6  -1   12.00    1.30
   6  -6  -1   11.30    1.30
  -6  -6  -1    9.80    0.90
  -6   6   1    9.70    1.30
   6  -6   1    8.80    1.20
  -6  -6  -1   10.80    1.20
   6  -7  -1  178.38    8.70
  -6  -7   1  179.28    8.50
  -6  -7   1  174.58    8.50
  -6   7  -1  181.98    8.70
  -6   7   1  174.68    8.70
  -6  -7  -1  181.68    8.50
   6  -7   1  173.28    8.70
  -6  -8   1    2.70    0.60
  -6  -8   1    3.50    0.80
  -6  -8   1    1.80    1.10
  -6   8  -1    1.80    1.10
   6  -8  -1    1.90    1.10
  -6  -8  -1    0.60    1.10
   6  -8   1    3.00    1.20
  -6   8   1    2.50    1.10
  -6   9  -1   25.60    2.10
   6  -9  -1   25.50    2.20
  -6  -9   1   25.10    2.20
  -6   9   1   26.50    2.10
  -6  -9  -1   26.20    2.20
   6  -9   1   23.60    2.10
   6  -9   1   25.20    2.00
   6 -10  -1   18.30    1.70
  -6 -10   1   15.90    1.80
  -6  10  -1   18.00    1.70
   6 -10  -1   17.90    1.70
  -6  10   1   19.70    1.70
   6 -10   1   21.40    1.80
  -6 -10  -1   17.90    1.80
   6 -10   1   19.60    1.60
   6 -11  -1   57.09    3.40
   6 -11  -1   55.39    3.40
  -6 -11   1   60.29    3.50
  -6  11  -1   53.09    3.40
   6 -11   1   59.79    3.40
  -6 -11  -1   49.30    3.40
  -6  11   1   60.69    3.40
   6 -11   1   54.09    3.40
   6 -12  -1   11.40    1.60
   6 -12  -1   10.50    1.60
  -6 -12   1    7.30    1.60
  -6  12  -1    9.90    1.50
  -6  12   1    9.90    1.50
   6 -12   1    9.80    1.50
   6 -12   1   10.50    1.50
  -6  13  -1    7.10    1.50
   6 -13  -1    6.60    1.60
  -6 -13   1    8.10    1.80
   6 -13  -1    9.00    1.60
  -6  13   1    9.40    1.50
   6 -13   1    8.20    1.60
  -6 -13  -1    7.50    1.80
   6 -13   1    7.00    1.60
   6 -14  -1    7.70    1.70
  -6 -14   1    9.30    2.00
   6 -14  -1    9.60    1.80
   6 -14   1    8.10    1.70
   6 -14   1   10.30    1.80
  -6 -14  -1    8.90    2.00
  -6 -15   1    7.00    2.00
   6 -15  -1   10.50    1.80
   6 -15  -1    8.60    1.90
   6 -15   1    6.70    1.80
   6 -15   1    9.60    1.90
  -6 -15  -1    6.40    2.00
   6 -16  -1    2.30    1.90
  -6 -16   1    2.80    2.00
   6 -16  -1    3.80    1.80
   6 -16   1    2.80    1.70
  -6 -16  -1   -1.10    2.00
   6 -16   1    5.40    1.90
   6 -17  -1   13.80    2.10
   6 -17  -1   15.90    2.40
  -6 -17   1   13.50    2.40
   6 -17   1   12.80    2.30
  -6 -17  -1   14.30    2.40
   6 -17   1   10.10    2.10
   6 -18  -1    7.20    2.10
  -6 -18   1    7.10    2.40
   6 -18  -1    6.20    2.30
   6 -18   1    8.30    2.10
  -6 -18  -1    4.80    2.30
   6 -18   1    6.60    2.20
   6 -19  -1   13.70    2.30
  -6 -19   1   13.50    2.70
   6 -19  -1   13.30    2.70
   6 -19   1   15.70    2.70
  -6 -19  -1   15.40    2.80
   6 -19   1   13.10    2.30
   6 -20  -1    7.50    2.20
   6 -20  -1    4.30    2.60
  -6 -20   1    7.40    2.80
  -6 -20  -1    2.20    2.70
   6 -20   1    7.30    2.60
   6 -20   1    4.20    2.10
   6 -21  -1   12.20    2.40
   6 -21  -1   22.10    3.20
  -6 -21   1   12.90    3.10
  -6 -21  -1   13.50    3.00
   6 -21   1   14.40    2.50
   6 -21   1   11.80    2.90
   7   0   1    0.40    0.90
  -7   0  -1   -0.70    0.80
  -7   0   1    0.90    0.90
   7   0  -1   -0.80    0.90
   7   1   1   11.30    1.10
  -7   1  -1    6.20    1.10
   7  -1  -1    9.50    1.10
  -7  -1   1    6.60    1.00
   7  -1   1    6.70    1.10
   7   1  -1   10.40    1.10
  -7   1   1    9.20    1.10
  -7  -1  -1    6.70    1.00
   7   2   1   46.50    2.60
  -7   2  -1   49.20    2.80
   7  -2  -1   47.30    2.80
  -7  -2   1   51.09    2.60
  -7  -2   1   49.50    2.70
   7  -2   1   50.29    2.80
  -7  -2  -1   49.60    2.60
   7   2  -1   44.60    2.60
  -7   2   1   47.80    2.80
  -7  -2  -1   42.70    2.60
  -7  -2  -1   48.70    2.70
   7  -3  -1  252.97   12.20
  -7  -3   1  251.47   12.10
   7   3   1  260.77   12.10
  -7  -3   1  237.98   12.10
  -7   3  -1  264.87   12.20
  -7  -3   1  265.27   12.40
  -7   3   1  253.47   12.20
   7  -3   1  268.27   12.20
   7   3  -1  266.97   12.10
  -7  -3  -1  236.68   12.10
  -7  -3  -1  240.38   12.10
  -7   4  -1  265.97   12.30
   7   4   1  256.97   12.10
  -7  -4   1  266.17   12.10
  -7  -4   1  228.68   12.10
   7  -4  -1  265.77   12.30
   7   4  -1  256.27   12.10
  -7   4   1  263.67   12.30
  -7  -4  -1  261.47   12.10
   7  -4   1  257.97   12.20
  -7  -4  -1  228.58   12.10
   7   5   1    4.70    0.70
  -7   5  -1    3.40    1.10
  -7  -5   1    4.00    0.70
   7  -5  -1    1.30    1.10
   7  -5   1    3.90    1.10
  -7  -5  -1    2.10    0.80
  -7   5   1    5.40    1.10
  -7  -5  -1    1.60    0.60
   7   5  -1    3.90    0.80
  -7  -5  -1    5.10    1.00
   7  -6  -1  635.04   30.20
  -7  -6   1  649.14   30.10
  -7   6  -1  653.43   30.20
  -7  -6   1  638.14   29.50
   7  -6   1  656.53   30.20
  -7  -6  -1  628.64   30.00
  -7   6   1  626.34   30.20
  -7  -6  -1  634.84   29.50
   7   6  -1  626.24   30.00
  -7  -7   1  121.99    6.10
  -7   7  -1  134.79    6.30
   7  -7  -1  120.69    6.20
  -7  -7   1  131.89    6.00
  -7  -7  -1  110.89    5.90
  -7  -7  -1  124.29    6.10
  -7   7   1  124.59    6.20
  -7  -7  -1  113.99    6.00
   7  -7   1  126.89    6.30
  -7  -8   1   97.29    4.90
   7  -8  -1   92.59    5.00
  -7   8  -1  101.39    5.00
  -7  -8   1  101.09    4.70
  -7  -8   1   82.49    4.60
   7  -8   1   96.19    5.00
  -7  -8  -1   94.09    4.90
  -7   8   1   93.99    5.00
  -7  -9   1   72.49    4.10
  -7  -9   1   67.09    3.80
   7  -9  -1   80.79    4.30
  -7   9  -1   76.79    4.20
  -7  -9  -1   75.09    4.10
  -7   9   1   84.29    4.20
   7  -9   1   82.39    4.30
  -7 -10   1  121.79    6.30
  -7  10  -1  124.09    6.30
   7 -10  -1  126.79    6.30
  -7 -10  -1  121.19    6.20
   7 -10   1  119.69    6.30
   7 -10   1  120.89    6.10
  -7  10   1  125.49    6.30
  -7 -11   1   73.89    4.20
   7 -11  -1   68.99    4.00
  -7  11  -1   72.49    4.10
   7 -11  -1   69.79    4.10
   7 -11   1   73.19    4.10
  -7 -11  -1   68.09    4.10
   7 -11   1   72.79    3.90
  -7  11   1   69.39    4.10
  -7 -12   1   95.29    4.90
  -7  12  -1   88.99    4.90
   7 -12  -1   89.89    4.80
   7 -12  -1   91.79    4.90
   7 -12   1   87.79    4.90
   7 -12   1   90.09    4.80
  -7  12   1   86.89    4.90
  -7 -12  -1   80.59    4.90
  -7  13  -1   58.89    3.90
   7 -13  -1   62.29    3.90
  -7 -13   1   64.59    4.00
   7 -13  -1   67.09    4.00
  -7  13   1   62.19    3.90
  -7 -13  -1   59.19    4.00
   7 -13   1   61.79    3.80
   7 -13   1   64.19    4.00
  -7 -14   1  107.79    5.90
   7 -14  -1  107.59    5.70
   7 -14  -1  103.69    5.70
   7 -14   1  100.49    5.70
  -7 -14  -1  103.59    5.80
   7 -14   1  102.89    5.80
  -7 -15   1    3.30    2.00
   7 -15  -1    2.30    1.80
   7 -15  -1    5.60    1.80
  -7 -15  -1    4.10    2.00
   7 -15   1    6.90    1.80
   7 -15   1    2.60    1.70
  -7 -16   1   27.30    2.80
   7 -16  -1   26.10    2.70
   7 -16  -1   32.80    2.60
   7 -16   1   28.20    2.60
   7 -16   1   28.00    2.60
  -7 -16  -1   27.70    2.80
   7 -17  -1   -0.50    1.80
   7 -17  -1   -0.60    2.00
  -7 -17   1    1.80    2.20
   7 -17   1    1.40    1.90
  -7 -17  -1   -0.30    2.10
   7 -17   1    0.70    2.00
   7 -18  -1    8.50    2.10
   7 -18  -1   11.60    2.40
  -7 -18   1   10.20    2.60
   7 -18   1   10.20    2.40
  -7 -18  -1    9.70    2.60
   7 -18   1    6.70    2.10
   7 -19  -1    8.00    2.20
   7 -19  -1    2.30    2.50
  -7 -19   1    7.30    2.60
   7 -19   1    2.90    2.40
   7 -19   1    9.00    2.30
  -7 -19  -1    4.10    2.60
   7 -20  -1    8.50    2.30
   7 -20  -1    7.40    2.70
  -7 -20   1   10.00    2.80
  -7 -20  -1    9.20    2.90
   7 -20   1    5.30    2.20
   7 -20   1   11.00    2.80
  -7 -21   1    5.40    2.80
   7 -21  -1    9.00    3.00
  -7 -21  -1    6.40    2.90
   7 -21   1    6.90    2.50
   8   0  -1   -0.60    0.90
  -8   0   1    1.00    0.90
  -8   0  -1    1.20    0.90
   8   0   1    0.70    0.90
   8  -1  -1    1.60    1.00
   8   1   1    1.10    0.90
  -8  -1   1    2.80    0.70
  -8   1  -1    0.90    1.00
  -8  -1   1    1.60    0.90
   8  -1   1    1.90    1.00
  -8  -1  -1    2.10    0.70
  -8   1   1   -0.20    1.00
  -8  -1  -1    2.30    0.90
   8   1  -1    0.70    0.90
  -8  -2   1   35.90    2.00
  -8   2  -1   29.40    2.20
   8  -2  -1   31.80    2.20
   8   2   1   30.40    2.00
  -8  -2   1   30.90    2.10
  -8   2   1   29.70    2.20
  -8  -2  -1   29.50    2.10
   8  -2   1   32.30    2.20
   8   2  -1   29.70    2.00
  -8  -2  -1   31.90    1.90
  -8  -3   1   10.00    1.10
  -8  -3   1   17.60    1.40
   8   3   1    9.30    1.10
   8  -3  -1   11.30    1.30
  -8   3  -1   13.00    1.40
   8  -3   1   11.20    1.30
   8   3  -1   10.20    1.10
  -8   3   1   11.40    1.30
  -8  -3  -1    7.30    1.10
  -8  -3  -1    8.30    1.00
  -8  -4   1   93.69    4.70
  -8  -4   1   79.69    4.60
  -8   4  -1  100.59    4.90
   8  -4  -1   96.49    4.80
  -8  -4   1   92.29    4.80
   8   4   1   91.69    4.60
  -8  -4  -1   97.79    4.70
  -8  -4  -1   80.39    4.60
  -8   4   1   96.69    4.90
   8  -4   1   93.39    4.80
   8   4  -1   94.49    4.60
   8   5   1   43.50    2.50
  -8  -5   1   42.70    2.70
   8  -5  -1   53.59    3.00
  -8  -5   1   44.60    2.60
  -8   5  -1   49.50    3.00
   8   5  -1   48.60    2.60
  -8  -5  -1   41.10    2.50
  -8  -5  -1   41.60    2.70
   8  -5   1   48.20    2.90
  -8   5   1   55.09    3.00
  -8   6  -1  220.08   10.40
  -8  -6   1  186.68   10.10
   8  -6  -1  214.18   10.40
   8   6   1  214.68   10.10
   8  -6   1  206.48   10.40
   8   6  -1  206.58   10.10
  -8  -6  -1  216.18   10.20
  -8   6   1  224.08   10.40
  -8  -6  -1  224.38   10.10
  -8   7  -1    1.50    1.20
   8  -7  -1    3.20    1.20
  -8  -7   1    4.70    1.20
  -8  -7  -1    0.20    0.80
   8  -7   1    4.20    1.20
  -8   7   1    2.90    1.20
   8   7  -1    3.30    0.70
  -8  -7  -1    3.90    1.20
  -8   8  -1   53.09    3.40
  -8  -8   1   54.49    3.30
  -8  -8   1   59.69    3.10
   8  -8  -1   54.79    3.40
  -8   8   1   57.09    3.40
  -8  -8  -1   51.99    3.40
   8  -8   1   54.09    3.40
  -8  -8  -1   56.19    3.00
  -8   9  -1    8.10    1.40
   8  -9  -1    8.10    1.40
  -8  -9   1    7.50    1.40
  -8  -9   1    5.10    0.80
  -8  -9   1    7.80    1.10
  -8  -9  -1    8.20    1.40
   8  -9   1    7.90    1.40
  -8   9   1    6.70    1.40
  -8 -10   1   71.29    4.20
   8 -10  -1   89.59    4.60
  -8 -10   1   85.79    4.60
  -8 -10   1   91.99    4.30
  -8  10  -1   83.49    4.60
  -8  10   1   83.59    4.60
  -8 -10  -1   76.69    4.60
   8 -10   1   86.79    4.70
  -8 -11   1    7.60    1.60
   8 -11  -1    7.00    1.40
  -8  11  -1    6.60    1.50
   8 -11  -1    7.00    1.50
   8 -11   1   10.10    1.40
   8 -11   1    7.10    1.50
  -8 -11  -1    6.90    1.60
  -8  11   1    7.30    1.50
  -8  12  -1   11.70    1.80
   8 -12  -1   13.80    1.80
   8 -12  -1   13.90    1.80
  -8 -12   1   14.50    1.90
  -8 -12  -1    7.10    1.80
   8 -12   1   13.90    1.80
  -8  12   1   11.60    1.70
   8 -12   1   13.50    1.70
  -8  13  -1   18.90    2.00
   8 -13  -1   18.30    1.90
   8 -13  -1   18.40    2.00
  -8 -13   1   17.60    2.20
  -8  13   1   14.30    1.90
   8 -13   1   14.80    2.00
  -8 -13  -1   15.10    2.10
   8 -13   1   15.70    1.90
   8 -14  -1   13.10    2.00
   8 -14  -1   19.20    2.10
  -8 -14   1   14.40    2.20
   8 -14   1   19.60    2.10
   8 -14   1   16.00    2.10
  -8 -14  -1   11.30    2.10
   8 -15  -1   11.90    2.00
  -8 -15   1    9.90    2.20
   8 -15  -1   11.00    2.00
  -8 -15  -1    8.70    2.20
   8 -15   1    7.40    2.00
   8 -15   1    9.30    1.90
   8 -16  -1    9.70    2.10
   8 -16  -1   11.50    2.00
  -8 -16   1    8.20    2.30
   8 -16   1    9.00    2.00
   8 -16   1    7.00    2.00
  -8 -16  -1    6.90    2.30
   8 -17  -1    7.00    2.10
  -8 -17   1    2.40    2.20
   8 -17  -1    4.40    2.10
   8 -17   1    4.70    2.10
   8 -17   1    5.20    2.00
  -8 -17  -1    8.60    2.30
   8 -18  -1   16.00    2.50
   8 -18  -1   18.30    2.70
  -8 -18   1   13.80    2.70
  -8 -18  -1   16.60    2.80
   8 -18   1   15.40    2.50
   8 -18   1   16.70    2.50
  -8 -19   1    1.20    2.50
   8 -19  -1    2.70    2.40
   8 -19  -1    2.00    2.20
  -8 -19  -1    0.30    2.50
   8 -19   1    4.60    2.20
   8 -19   1    2.50    2.40
   8 -20  -1   10.20    2.40
   8 -20  -1    6.10    2.80
  -8 -20   1   11.70    2.80
  -8 -20  -1   14.20    3.00
   8 -20   1   12.10    2.70
   8 -20   1   11.70    2.50
   8 -21  -1    3.00    2.40
   8 -21  -1   -0.60    2.70
  -8 -21   1    0.60    2.80
   8 -21   1    2.40    2.50
  -8 -21  -1    2.10    2.90
  -9   0   1    5.40    1.20
  -9   0  -1    4.70    1.10
   9   0  -1    3.20    1.10
   9   0   1    5.00    1.10
  -9  -1   1    1.10    1.00
  -9  -1   1    2.30    0.80
   9   1   1    0.90    1.00
   9  -1  -1    2.70    1.10
  -9   1  -1    0.50    1.20
  -9  -1  -1    2.30    0.70
   9  -1   1    0.40    1.00
  -9  -1  -1    2.00    1.10
  -9   1   1    1.50    1.10
   9   1  -1    2.00    1.00
  -9  -2   1   43.20    2.50
  -9  -2   1   38.00    2.60
   9   2   1   39.30    2.50
  -9   2  -1   43.40    2.80
   9  -2  -1   36.50    2.70
   9   2  -1   40.30    2.60
  -9   2   1   40.50    2.80
   9  -2   1   42.20    2.70
  -9  -2  -1   43.50    2.60
  -9  -2  -1   47.80    2.40
  -9  -3   1  266.37   12.30
  -9  -3   1  250.97   12.50
  -9   3  -1  250.37   12.30
   9  -3  -1  258.17   12.30
   9   3   1  246.98   12.20
  -9   3   1  250.47   12.30
   9  -3   1  262.67   12.30
   9   3  -1  259.97   12.20
  -9  -3  -1  254.57   12.20
  -9  -3  -1  250.57   12.40
  -9  -4   1  272.17   13.20
  -9  -4   1  276.37   12.90
  -9   4  -1  279.07   13.00
   9  -4  -1  275.27   13.00
   9   4   1  264.87   12.80
   9   4  -1  262.47   12.90
  -9  -4  -1  231.28   12.80
  -9  -4  -1  281.47   12.90
   9  -4   1  279.37   13.00
  -9   4   1  274.97   13.00
  -9   5  -1  517.95   24.00
  -9  -5   1  429.46   23.80
   9   5   1  514.45   23.80
   9  -5  -1  522.85   24.00
  -9  -5   1  535.65   23.90
  -9  -5  -1  454.15   23.80
  -9   5   1  518.55   24.00
   9   5  -1  503.05   23.80
   9  -5   1  520.35   24.00
  -9  -5  -1  527.85   23.80
  -9   6  -1  225.68   10.60
   9   6   1  221.28   10.30
  -9  -6   1  192.28   10.40
   9  -6  -1  228.08   10.60
  -9  -6   1  229.78   10.50
  -9   6   1  210.48   10.60
  -9  -6  -1  191.38   10.30
   9  -6   1  219.18   10.60
  -9  -6  -1  232.78   10.40
   9   6  -1  219.18   10.40
  -9  -7   1  158.58    7.40
  -9  -7   1  127.39    7.30
   9  -7  -1  161.08    7.70
  -9   7  -1  155.88    7.70
   9   7  -1  152.48    7.30
  -9  -7  -1  147.89    7.50
   9  -7   1  153.48    7.70
  -9   7   1  148.49    7.60
  -9  -7  -1  163.98    7.40
   9  -8  -1  257.87   12.60
  -9   8  -1  250.67   12.60
  -9  -8  -1  257.17   12.30
   9  -8   1  260.87   12.60
  -9  -8  -1  266.97   12.40
  -9   8   1  259.47   12.60
  -9  -9   1   77.69    4.50
   9  -9  -1   88.59    4.60
  -9   9  -1   79.49    4.50
  -9  -9  -1   81.49    4.40
  -9  -9  -1   84.59    4.10
   9  -9   1   86.19    4.60
  -9   9   1   82.39    4.60
  -9  -9  -1   68.79    4.00
   9 -10  -1  133.79    7.00
  -9 -10   1  137.39    6.90
  -9  10  -1  133.79    7.00
   9 -10   1  134.89    7.00
  -9  10   1  139.79    7.00
  -9 -10  -1  133.89    6.90
  -9 -11   1   32.20    2.90
   9 -11  -1   32.20    2.90
  -9  11  -1   38.90    3.00
  -9 -11  -1   41.50    3.00
  -9  11   1   38.40    3.00
   9 -11   1   38.10    3.00
   9 -11   1   37.50    2.70
   9 -12  -1   52.29    3.60
  -9 -12   1   59.09    3.70
  -9  12  -1   53.19    3.70
   9 -12  -1   55.59    3.70
   9 -12   1   55.29    3.50
  -9  12   1   55.69    3.70
   9 -12   1   55.89    3.80
  -9 -12  -1   53.69    3.80
   9 -13  -1   93.49    5.00
  -9  13  -1   81.99    5.10
  -9 -13   1   82.89    5.10
   9 -13  -1   97.39    5.20
   9 -13   1   83.99    5.20
   9 -13   1   84.39    4.90
  -9  13   1   96.89    5.20
  -9 -13  -1   86.59    5.10
   9 -14  -1   13.20    2.00
  -9 -14   1   12.60    2.20
   9 -14  -1   15.10    2.10
  -9 -14  -1   10.90    2.10
   9 -14   1   10.30    2.00
   9 -14   1   12.80    1.90
   9 -15  -1   14.10    2.20
  -9 -15   1   13.60    2.30
   9 -15  -1   13.30    2.10
   9 -15   1   13.70    2.10
  -9 -15  -1   10.70    2.20
   9 -15   1   13.50    2.20
   9 -16  -1   -1.40    1.90
   9 -16  -1   -2.40    1.90
  -9 -16   1    3.70    2.20
  -9 -16  -1    0.70    2.10
   9 -16   1   -1.10    1.80
   9 -16   1    0.50    1.90
   9 -17  -1    5.20    2.20
  -9 -17   1    4.90    2.40
   9 -17  -1    5.70    2.10
   9 -17   1    7.50    2.10
   9 -17   1    6.20    2.10
  -9 -17  -1    6.90    2.40
   9 -18  -1    0.90    2.20
   9 -18  -1   -1.80    2.10
  -9 -18   1    2.00    2.50
   9 -18   1   -2.40    2.10
   9 -18   1   -0.90    2.10
  -9 -18  -1    1.20    2.40
   9 -19  -1   18.60    2.60
   9 -19  -1   13.00    2.80
  -9 -19   1   11.80    2.90
  -9 -19  -1   14.40    2.90
   9 -19   1   18.10    2.70
   9 -19   1   14.90    2.80
  -9 -20   1    0.70    2.80
   9 -20  -1    6.30    2.50
   9 -20  -1    2.60    2.60
   9 -20   1   -2.10    2.40
  -9 -20  -1    3.40    2.80
   9 -20   1    4.40    2.50
 -10   0  -1    3.10    0.80
  10   0  -1    3.00    1.20
 -10   0   1    2.80    1.20
  10   0   1    3.30    1.20
 -10   0  -1    3.70    1.30
 -10  -1   1    8.80    1.40
 -10  -1   1   17.50    1.50
 -10   1  -1    8.80    1.50
  10  -1  -1   12.30    1.40
  10   1   1   10.70    1.40
 -10  -1  -1   15.30    1.30
 -10  -1  -1    8.60    1.40
  10  -1   1   10.80    1.40
  10   1  -1   12.40    1.40
 -10  -2   1    8.10    1.30
  10   2   1    7.40    1.20
 -10   2  -1   10.60    1.40
  10  -2   1    9.00    1.30
 -10  -2  -1    6.50    1.30
  10   2  -1    9.80    1.30
 -10  -3   1   77.39    4.00
  10  -3  -1   75.49    4.20
 -10   3  -1   78.49    4.20
 -10  -3   1   79.59    4.10
  10   3   1   69.59    4.00
 -10  -3  -1   75.29    4.00
 -10   3   1   78.59    4.20
  10   3  -1   68.89    4.00
  10  -3   1   72.49    4.20
 -10  -3  -1   76.99    4.10
  10   4   1   10.90    1.30
 -10  -4   1   19.00    1.70
 -10   4  -1   13.60    1.60
 -10  -4   1   11.60    1.40
  10   4  -1   14.00    1.30
 -10  -4  -1   10.20    1.40
  10  -4   1   14.90    1.60
 -10   4   1   16.80    1.70
  10   5   1  376.86   17.50
  10  -5  -1  392.16   17.70
 -10  -5   1  373.66   17.60
 -10   5  -1  369.16   17.70
 -10  -5  -1  383.96   17.60
  10  -5   1  364.26   17.70
 -10   5   1  375.06   17.70
  10   5  -1  359.66   17.50
 -10  -5  -1  323.77   17.50
  10  -6  -1   54.49    3.10
 -10  -6   1   40.40    2.70
  10   6   1   42.90    2.50
 -10  -6   1   36.20    2.50
 -10   6  -1   44.50    3.10
 -10  -6  -1   45.10    2.70
  10   6  -1   41.20    2.60
 -10   6   1   58.69    3.10
 -10  -6  -1   42.30    2.50
  10  -6   1   45.20    3.00
 -10   7  -1  128.99    6.30
  10  -7  -1  124.89    6.30
 -10  -7   1  100.09    5.90
 -10  -7   1  132.69    6.10
  10   7   1  120.19    5.90
  10   7  -1  120.09    5.90
 -10   7   1  122.29    6.30
  10  -7   1  123.09    6.30
 -10  -7  -1  100.99    5.90
 -10  -7  -1  135.89    6.10
  10  -8  -1   19.80    1.90
 -10  -8   1   13.40    1.30
 -10  -8   1   19.10    1.60
 -10   8  -1   21.20    2.00
 -10   8   1   18.50    1.90
 -10  -8  -1   17.90    1.50
  10  -8   1   19.70    1.90
  10   8  -1   17.40    1.50
  10  -9  -1  103.09    5.50
 -10   9  -1   93.69    5.50
 -10  -9   1  103.09    5.20
  10  -9   1  107.19    5.60
 -10  -9  -1  102.89    5.10
 -10   9   1   98.69    5.50
 -10  -9  -1   94.39    5.40
 -10 -10   1   18.90    2.00
 -10 -10   1   20.90    1.90
  10 -10  -1   18.80    2.10
 -10  10  -1   17.50    2.10
 -10 -10  -1   21.40    1.80
 -10  10   1   22.00    2.20
  10 -10   1   20.40    2.10
 -10 -10  -1   19.60    2.10
 -10  11  -1   32.60    2.90
 -10 -11   1   25.90    2.50
  10 -11  -1   28.10    2.50
 -10  11   1   31.40    2.50
  10 -11   1   35.20    3.00
 -10 -11  -1   27.40    2.50
  10 -12  -1    4.80    1.80
 -10  12  -1    6.10    1.80
 -10 -12   1    5.20    1.80
  10 -12   1    7.50    1.80
 -10 -12  -1    1.70    1.70
 -10  12   1    3.60    1.70
  10 -12   1    3.40    1.50
 -10 -13   1   21.60    2.50
 -10  13  -1   24.70    2.50
  10 -13  -1   36.60    3.10
  10 -13  -1   24.70    2.30
  10 -13   1   31.40    2.70
 -10  13   1   23.20    2.40
 -10 -13  -1   19.60    2.50
  10 -13   1   24.00    2.50
 -10 -14   1    5.30    2.00
  10 -14  -1    6.10    1.80
  10 -14  -1    3.20    1.90
  10 -14   1    2.40    1.70
 -10 -14  -1    5.60    2.00
  10 -14   1    3.00    1.90
  10 -15  -1   23.30    2.60
  10 -15  -1   20.30    2.40
 -10 -15   1   25.10    2.70
 -10 -15  -1   21.00    2.60
  10 -15   1   25.50    2.40
  10 -15   1   22.40    2.50
  10 -16  -1    2.40    2.00
 -10 -16   1   -1.20    2.10
  10 -16  -1    2.60    2.10
 -10 -16  -1    2.00    2.20
  10 -16   1    0.60    2.00
  10 -16   1    4.50    2.20
  10 -17  -1   14.30    2.40
 -10 -17   1   12.90    2.60
  10 -17  -1    8.50    2.30
 -10 -17  -1    7.30    2.50
  10 -17   1   11.90    2.30
  10 -17   1   13.30    2.50
  10 -18  -1    1.40    2.20
  10 -18  -1   -1.10    2.20
 -10 -18   1    0.90    2.40
  10 -18   1    2.60    2.20
  10 -18   1   -0.20    2.20
 -10 -18  -1    1.30    2.40
  10 -19  -1   10.50    2.70
  10 -19  -1    8.40    2.60
 -10 -19   1    8.30    2.70
  10 -19   1   11.40    2.70
 -10 -19  -1   10.00    2.80
  10 -19   1    7.60    2.50
 -10 -20   1    1.50    2.80
  10 -20  -1   -3.10    2.60
  10 -20  -1    5.30    2.70
  10 -20   1   -0.90    2.50
  10 -20   1   -1.00    2.50
 -10 -20  -1    0.90    2.80
 -11   0   1    2.10    1.30
 -11   0  -1    3.50    0.80
  11   0  -1    2.10    1.20
 -11   0  -1    1.60    1.30
  11   0   1    1.90    1.20
  11   1   1    3.80    1.20
  11  -1  -1    3.10    1.20
 -11  -1   1    3.20    1.00
 -11   1  -1    2.60    1.30
 -11  -1   1    3.50    1.30
 -11  -1  -1    6.00    0.90
 -11  -1  -1    0.30    1.20
 -11   1   1    3.10    1.30
  11  -1   1    1.50    1.20
  11   1  -1    2.90    1.20
 -11   2  -1   72.69    4.20
  11  -2  -1   72.39    4.10
  11   2   1   70.09    3.90
 -11  -2   1   72.39    3.90
 -11  -2   1   74.59    4.10
 -11  -2  -1   75.59    4.10
 -11   2   1   70.29    4.10
 -11  -2  -1   73.09    3.90
  11   2  -1   73.79    4.00
  11  -2   1   71.49    4.10
 -11  -3   1   21.10    1.90
 -11   3  -1   25.20    2.00
  11  -3  -1   23.60    2.00
 -11  -3   1   22.00    1.90
  11   3   1   21.90    2.00
 -11   3   1   23.70    2.00
 -11  -3  -1   23.10    2.10
  11  -3   1   25.10    2.00
  11   3  -1   21.30    1.80
 -11  -3  -1   22.40    1.90
  11  -4  -1  242.28   11.50
 -11   4  -1  240.78   11.60
 -11  -4   1  246.58   11.40
 -11  -4   1  225.38   11.60
  11   4   1  230.58   11.40
 -11   4   1  237.18   11.60
 -11  -4  -1  239.18   11.40
  11   4  -1  228.28   11.40
  11  -4   1  232.88   11.50
  11   5   1  158.88    7.80
  11  -5  -1  161.68    8.10
 -11  -5   1  164.28    8.00
 -11   5  -1  163.98    8.10
 -11  -5  -1  164.38    7.90
  11  -5   1  159.38    8.10
 -11   5   1  155.28    8.10
  11   5  -1  154.38    7.80
 -11  -6   1  167.38    8.00
 -11   6  -1  165.98    8.20
  11   6   1  154.48    7.80
  11  -6  -1  161.28    8.10
  11  -6   1  162.68    8.20
 -11  -6  -1  165.38    8.00
 -11   6   1  156.98    8.20
  11   6  -1  154.28    7.80
  11   7   1   82.29    4.40
  11  -7  -1   87.09    4.90
 -11  -7   1   88.39    4.70
 -11   7  -1   85.59    4.90
 -11   7   1   86.69    4.90
 -11  -7  -1   94.79    4.70
  11   7  -1   88.29    4.50
  11  -7   1   88.79    4.90
 -11  -8   1  148.39    7.20
  11  -8  -1  152.38    7.50
 -11   8  -1  139.59    7.50
 -11   8   1  142.59    7.50
 -11  -8  -1  145.69    7.20
  11   8  -1  138.29    7.10
  11  -8   1  149.09    7.50
  11  -9  -1   82.29    4.80
 -11   9  -1   78.69    4.80
 -11  -9   1   82.39    4.40
  11  -9   1   83.89    4.80
 -11   9   1   79.69    4.80
 -11  -9  -1   84.79    4.40
 -11  10  -1   50.79    3.70
 -11 -10   1   53.99    3.20
  11 -10  -1   51.99    3.70
  11 -10   1   54.19    3.80
 -11  10   1   52.59    3.70
 -11 -10  -1   47.60    3.60
 -11 -10  -1   54.99    3.10
 -11 -11   1   30.40    2.40
  11 -11  -1   28.00    2.70
 -11  11  -1   31.60    2.70
 -11 -11  -1   28.00    2.60
  11 -11   1   33.70    2.70
 -11  11   1   29.80    2.70
 -11 -12   1   40.60    3.60
  11 -12  -1   46.10    3.70
 -11  12  -1   49.10    3.70
 -11 -12   1   50.09    3.10
  11 -12   1   51.89    3.80
 -11 -12  -1   47.80    3.70
 -11  12   1   49.20    3.70
 -11  13  -1    1.80    1.80
  11 -13  -1    0.90    1.90
 -11 -13   1    2.10    1.80
  11 -13  -1    2.60    1.70
 -11 -13  -1   -1.00    1.90
  11 -13   1    1.80    1.70
  11 -13   1    2.30    1.80
 -11 -14   1    4.30    2.10
  11 -14  -1    7.20    1.90
  11 -14  -1    2.60    2.00
  11 -14   1    6.20    1.80
 -11 -14  -1    4.90    2.00
  11 -14   1    6.00    2.00
  11 -15  -1    4.80    1.90
 -11 -15   1    2.40    2.10
  11 -15  -1   -0.20    2.00
 -11 -15  -1    3.30    2.10
  11 -15   1    6.10    2.10
  11 -15   1    1.30    1.90
  11 -16  -1    8.70    2.20
 -11 -16   1    4.10    2.30
  11 -16  -1    4.20    2.00
  11 -16   1    1.30    2.10
  11 -16   1    6.70    2.00
 -11 -16  -1    5.10    2.30
  11 -17  -1    0.10    2.10
 -11 -17   1    3.40    2.50
  11 -17  -1   -0.50    2.10
  11 -17   1    2.90    2.30
 -11 -17  -1    0.90    2.30
  11 -17   1    1.40    2.20
  11 -18  -1    8.80    2.60
  11 -18  -1    9.30    2.50
 -11 -18   1    3.30    2.70
  11 -18   1   10.00    2.40
  11 -18   1   11.60    2.60
 -11 -18  -1    6.30    2.60
 -11 -19   1    2.80    2.80
  11 -19  -1   -0.40    2.40
  11 -19  -1   -0.60    2.50
  11 -19   1   -2.80    2.40
  11 -19   1    0.00    2.30
 -11 -19  -1    0.70    2.70
  12   0   1   -0.90    1.20
 -12   0  -1   -1.00    1.30
 -12   0  -1    1.50    0.90
  12   0  -1   -0.60    1.20
 -12   0   1   -0.70    1.30
 -12  -1   1    8.20    1.20
 -12  -1   1    7.80    1.50
 -12   1  -1    8.70    1.50
  12  -1  -1   10.00    1.50
  12   1   1    8.60    1.40
 -12  -1  -1    7.40    1.50
 -12   1   1    7.80    1.50
  12   1  -1    9.00    1.40
  12  -1   1    6.20    1.40
 -12  -1  -1    9.10    1.10
 -12   2  -1   36.60    2.80
 -12  -2   1   32.60    2.80
  12   2   1   36.00    2.60
 -12  -2   1   38.10    2.50
  12  -2  -1   41.40    2.80
 -12  -2  -1   38.40    2.40
  12  -2   1   35.20    2.70
 -12   2   1   39.80    2.90
  12   2  -1   34.50    2.60
 -12  -2  -1   38.40    2.80
 -12  -3   1   37.60    2.50
 -12  -3   1   33.90    2.70
 -12   3  -1   39.60    2.90
  12   3   1   34.00    2.40
  12  -3  -1   38.00    2.80
 -12  -3  -1   31.70    2.70
  12   3  -1   32.60    2.50
 -12  -3  -1   34.10    2.40
  12  -3   1   36.30    2.80
 -12   3   1   38.80    2.90
 -12   4  -1  107.59    5.90
  12   4   1  106.09    5.70
 -12  -4   1  112.79    5.80
 -12  -4   1  111.79    5.80
  12  -4  -1  114.89    6.00
  12  -4   1  118.89    6.00
 -12  -4  -1  113.99    5.80
  12   4  -1  107.99    5.70
 -12   4   1  111.39    6.00
 -12   5  -1   23.80    2.20
  12   5   1   24.60    1.80
 -12  -5   1   23.10    2.00
  12  -5  -1   25.70    2.20
 -12   5   1   25.60    2.20
 -12  -5  -1   20.00    1.90
  12   5  -1   20.30    2.00
  12  -5   1   24.80    2.20
  12   6   1  109.79    5.80
 -12  -6   1  114.29    6.00
 -12   6  -1  115.59    6.20
  12  -6  -1  119.89    6.20
  12   6  -1  114.79    5.80
 -12  -6  -1  115.79    6.00
 -12   6   1  116.69    6.20
  12  -6   1  117.19    6.20
  12  -7  -1   43.50    3.30
 -12   7  -1   43.70    3.30
 -12  -7   1   44.50    2.90
  12   7   1   40.00    2.50
 -12   7   1   38.30    3.20
  12  -7   1   43.50    3.30
 -12  -7  -1   41.80    2.90
  12   7  -1   41.20    2.60
  12  -8  -1   50.59    3.60
 -12  -8   1   54.89    3.20
 -12   8  -1   47.70    3.60
  12  -8   1   45.40    3.60
 -12   8   1   50.79    3.60
 -12  -8  -1   52.49    3.20
  12  -9  -1   19.90    2.30
 -12   9  -1   22.40    2.40
 -12  -9   1   23.00    1.90
 -12  -9  -1   21.10    1.90
  12  -9   1   22.20    2.40
 -12   9   1   20.20    2.30
 -12  10  -1   13.60    2.10
  12 -10  -1   14.40    2.20
 -12 -10   1   16.20    1.70
 -12 -10  -1   17.10    1.70
 -12  10   1   12.00    2.10
  12 -10   1   13.60    2.20
 -12 -11   1    3.90    1.40
  12 -11  -1    6.50    2.00
 -12  11  -1    3.70    1.90
 -12 -11  -1    3.70    1.40
 -12  11   1    3.20    1.90
  12 -11   1    8.70    2.00
  12 -12  -1   24.80    2.70
 -12  12  -1   24.40    2.60
 -12 -12   1   28.50    2.40
 -12  12   1   22.70    2.50
  12 -12   1   28.20    2.60
 -12 -13   1    0.70    1.30
  12 -13  -1    0.60    2.00
 -12  13  -1    0.10    2.00
  12 -13   1    1.60    2.00
  12 -13   1    0.50    1.60
 -12 -13  -1    0.10    1.90
  12 -14  -1   15.40    2.30
  12 -14  -1   13.70    2.10
  12 -14   1   14.30    2.10
 -12 -14  -1    9.90    2.30
  12 -14   1   12.60    2.30
  12 -15  -1   -0.80    1.90
  12 -15  -1    1.80    2.10
  12 -15   1    2.90    1.90
  12 -15   1    0.10    2.10
 -12 -15  -1   -2.00    2.10
  12 -16  -1   10.00    2.30
 -12 -16   1    8.80    2.40
  12 -16  -1   12.50    2.50
  12 -16   1   13.60    2.50
 -12 -16  -1   14.60    2.70
  12 -16   1   12.10    2.20
  12 -17  -1   -1.10    2.10
 -12 -17   1    1.30    2.30
  12 -17  -1    2.80    2.40
  12 -17   1   -1.50    2.10
  12 -17   1   -1.80    2.30
 -12 -17  -1   -0.30    2.30
  12 -18  -1    6.00    2.50
  12 -18  -1    8.00    2.60
 -12 -18   1    5.80    2.70
  12 -18   1    4.80    2.50
  12 -18   1    6.00    2.40
 -12 -18  -1   10.10    2.80
  12 -19  -1    0.30    2.40
 -12 -19   1    3.80    2.80
 -12 -19  -1    1.40    2.60
  12 -19   1    1.10    2.50
  12 -19   1   -0.30    2.40
 -13   0  -1    1.20    1.50
  13   0  -1    1.10    1.40
 -13   0  -1    0.40    0.90
 -13   0   1   -1.10    1.00
 -13   0   1   -1.10    1.40
  13   0   1    1.20    1.30
 -13   1  -1    9.50    1.70
  13  -1  -1   10.80    1.60
 -13  -1   1    8.10    1.60
 -13  -1   1    9.40    1.30
  13   1   1    9.90    1.50
  13  -1   1    9.60    1.50
 -13  -1  -1   12.40    1.30
  13   1  -1    6.10    1.50
 -13  -1  -1   12.20    1.70
 -13   1   1    6.50    1.60
 -13  -2   1    3.00    1.20
  13  -2  -1    1.90    1.40
 -13  -2   1    2.50    1.50
  13   2   1    1.60    1.30
 -13   2  -1    1.90    1.50
 -13  -2  -1    5.10    1.10
 -13   2   1    2.60    1.60
 -13  -2  -1    3.80    1.50
  13   2  -1    3.30    1.30
  13  -2   1    3.10    1.40
  13   3   1   79.39    4.40
 -13   3  -1   89.09    4.80
 -13  -3   1   73.69    4.40
 -13  -3   1   81.79    4.60
  13  -3  -1   80.99    4.70
 -13  -3  -1   77.09    4.60
  13  -3   1   87.19    4.70
 -13   3   1   80.99    4.70
 -13  -3  -1   81.79    4.40
  13   3  -1   81.19    4.40
  13   4   1   35.90    2.60
 -13  -4   1   34.20    2.70
  13  -4  -1   36.30    3.00
 -13  -4   1   35.60    2.90
 -13   4  -1   39.60    3.20
 -13  -4  -1   39.20    2.90
  13   4  -1   38.60    2.70
 -13   4   1   38.00    3.10
  13  -4   1   37.40    3.00
 -13  -5   1   44.30    3.00
  13  -5  -1   39.50    3.20
 -13   5  -1   40.30    3.30
  13   5   1   38.00    2.60
 -13   5   1   38.40    3.30
  13  -5   1   42.20    3.20
  13   5  -1   38.60    2.70
 -13  -5  -1   42.60    3.00
 -13  -6   1  133.89    7.00
  13   6   1  127.69    6.80
  13  -6  -1  145.49    7.20
 -13   6  -1  146.09    7.30
 -13  -6  -1  139.89    7.00
 -13   6   1  133.49    7.20
  13   6  -1  128.19    6.80
  13  -6   1  147.09    7.20
 -13  -7   1  104.79    5.70
  13  -7  -1  112.79    6.00
 -13   7  -1  105.19    6.00
 -13   7   1  106.19    6.00
  13  -7   1  112.09    6.00
 -13  -7  -1  107.19    5.70
  13  -8  -1   68.59    4.40
 -13  -8   1   70.59    4.10
 -13   8  -1   64.29    4.50
 -13   8   1   61.39    4.40
  13  -8   1   73.19    4.50
 -13  -8  -1   69.89    4.10
 -13  -9   1   62.99    3.80
 -13   9  -1   58.89    4.20
  13  -9  -1   59.69    4.20
  13  -9   1   58.19    4.20
 -13  -9  -1   61.59    3.70
 -13   9   1   56.49    4.20
  13 -10  -1   25.80    2.60
 -13  10  -1   24.80    2.70
 -13 -10   1   23.30    2.10
  13 -10   1   19.50    2.50
 -13 -10  -1   26.50    2.20
 -13  10   1   25.10    2.70
 -13 -11   1   28.00    2.60
  13 -11  -1   28.40    2.80
 -13  11  -1   25.10    2.70
 -13  11   1   21.20    2.70
 -13 -11  -1   29.40    2.20
  13 -11   1   23.80    2.70
 -13  12  -1    4.90    2.10
  13 -12  -1    1.50    2.10
 -13 -12   1    4.70    1.50
 -13  12   1    6.00    2.10
 -13 -12  -1    4.30    1.50
  13 -12   1    6.20    2.10
 -13 -13   1   -0.40    1.40
 -13  13  -1    2.60    2.10
  13 -13  -1   -1.60    2.10
  13 -13   1    1.10    2.10
  13 -14  -1    9.10    2.30
  13 -14  -1    8.90    2.10
  13 -14   1    5.40    1.90
  13 -14   1    8.00    2.40
  13 -15  -1   -2.60    2.00
  13 -15  -1    2.30    2.20
  13 -15   1    1.20    1.90
  13 -15   1    2.10    2.20
  13 -16  -1    0.80    2.20
  13 -16  -1   -1.20    2.00
  13 -16   1    2.90    2.30
 -13 -16  -1    2.10    2.30
  13 -16   1    1.00    2.00
  13 -17  -1    1.50    2.40
  13 -17  -1    3.50    2.20
  13 -17   1    3.30    2.20
  13 -17   1    5.20    2.50
 -13 -17  -1   -2.60    2.40
  13 -18  -1    0.60    2.40
  13 -18  -1    2.30    2.40
  13 -18   1    2.90    2.50
 -13 -18  -1    1.50    2.60
  13 -18   1   -4.40    2.20
 -14   0  -1    0.00    1.60
 -14   0  -1    0.90    1.00
 -14   0   1    0.70    1.60
 -14   0   1   -0.50    1.10
  14   0   1   -0.30    1.40
  14   0  -1    1.20    1.40
 -14  -1   1    4.40    1.20
 -14  -1   1    2.50    1.60
  14   1   1    1.10    1.40
  14  -1  -1    3.00    1.50
 -14   1  -1    3.90    1.70
 -14   1  -1    5.10    1.10
 -14   1   1    3.20    1.70
 -14  -1  -1    3.90    1.10
 -14  -1  -1    4.60    1.60
  14  -1   1    0.70    1.50
  14   1  -1   -0.20    1.40
  14   2   1   23.80    2.00
 -14  -2   1   22.10    1.90
  14  -2  -1   17.10    2.00
 -14   2  -1   19.90    2.20
 -14  -2   1   21.70    2.10
 -14   2   1   21.50    2.30
  14  -2   1   21.30    2.10
  14   2  -1   19.50    1.90
 -14  -2  -1   18.90    2.10
 -14  -2  -1   20.90    1.90
  14   3   1   29.10    2.50
 -14   3  -1   34.50    2.70
 -14  -3   1   30.00    2.50
 -14  -3   1   30.10    2.50
  14  -3  -1   31.80    2.60
 -14  -3  -1   31.10    2.40
 -14   3   1   33.00    2.70
 -14  -3  -1   31.50    2.80
  14   3  -1   32.10    2.50
  14  -3   1   31.20    2.90
 -14  -4   1   23.10    2.00
 -14  -4   1   22.40    2.20
  14  -4  -1   21.70    2.30
 -14   4  -1   20.70    2.30
  14   4   1   22.20    1.90
 -14   4   1   21.10    2.40
  14  -4   1   23.60    2.30
 -14  -4  -1   20.90    2.10
  14   4  -1   17.80    1.90
  14  -5  -1   28.80    2.50
 -14  -5   1   27.80    2.40
 -14   5  -1   28.40    2.60
  14   5   1   26.40    2.10
 -14  -5  -1   25.00    2.30
  14   5  -1   26.20    2.10
  14  -5   1   28.80    2.60
 -14   5   1   24.60    2.50
 -14   6  -1   14.50    2.30
  14  -6  -1   13.40    2.10
 -14  -6   1   18.20    2.00
  14  -6   1   16.20    2.20
 -14   6   1   13.20    2.20
 -14  -6  -1   17.70    2.00
 -14  -7   1   44.50    3.20
 -14   7  -1   38.30    3.60
  14  -7  -1   43.30    3.50
 -14  -7  -1   37.30    3.20
 -14   7   1   42.70    3.60
  14  -7   1   42.80    3.60
 -14  -8   1   20.00    2.20
  14  -8  -1   22.40    2.50
 -14   8  -1   21.50    2.70
  14  -8   1   19.70    2.50
 -14  -8  -1   24.00    2.20
 -14   8   1   29.30    2.70
 -14   9  -1    8.10    2.30
 -14  -9   1   10.40    1.80
  14  -9  -1    5.10    2.10
 -14   9   1    5.20    2.10
 -14  -9  -1    7.80    1.80
  14  -9   1    7.90    2.10
  14 -10  -1    9.40    2.30
 -14  10  -1    7.30    2.20
 -14 -10   1   10.40    1.80
 -14  10   1    7.70    2.20
 -14 -10  -1    9.20    1.80
  14 -10   1    9.00    2.30
  14 -11  -1   25.50    2.70
 -14 -11   1   22.40    2.20
 -14  11  -1   23.50    2.70
  14 -11   1   24.20    2.70
 -14  11   1   22.90    2.60
 -14 -11  -1   19.10    2.20
 -14  12  -1    5.40    2.20
 -14 -12   1    2.00    1.60
  14 -12  -1    3.20    2.20
 -14  12   1    1.90    2.10
 -14 -12  -1    3.40    1.60
  14 -12   1    0.70    2.20
 -14 -13   1    7.40    1.70
  14 -13  -1   10.40    2.40
  14 -13   1    6.20    2.30
  14 -14  -1   -0.70    2.30
  14 -14   1    0.60    1.90
  14 -14   1    3.10    2.40
  14 -15  -1   13.10    2.40
  14 -15  -1   18.80    2.80
  14 -15   1   18.40    2.90
  14 -15   1   17.70    2.30
  14 -16  -1   -0.50    2.20
  14 -16  -1   -1.30    2.20
  14 -16   1    1.20    2.40
  14 -16   1    0.60    2.00
  14 -17  -1   12.70    2.70
  14 -17  -1    9.80    2.50
  14 -17   1   12.20    2.80
  14 -17   1    9.50    2.30
  14 -18  -1    1.00    2.60
  14 -18  -1   -0.80    2.40
  14 -18   1   -1.80    2.30
  14 -18   1   -2.00    2.50
 -15   0  -1    4.70    1.80
 -15   0   1    2.30    1.30
 -15   0   1   -0.70    1.80
  15   0   1    2.30    1.60
 -15   0  -1    4.40    1.20
  15   0  -1    3.20    1.60
 -15   1  -1    1.40    1.10
  15  -1  -1    0.80    1.60
 -15   1  -1   -2.50    1.70
 -15  -1   1    0.90    1.70
 -15  -1   1   -0.40    1.20
  15   1   1   -0.50    1.50
 -15  -1  -1   -3.80    1.60
 -15   1   1   -3.00    1.70
  15  -1   1   -0.80    1.60
  15   1  -1   -0.20    1.50
 -15  -1  -1    0.30    1.20
 -15  -2   1   17.50    1.90
 -15  -2   1   16.70    2.20
  15   2   1   31.20    2.50
  15  -2  -1   18.70    2.20
 -15   2  -1   18.20    2.30
  15   2  -1   19.80    2.00
  15  -2   1   22.80    2.20
 -15   2   1   19.10    2.40
 -15  -2  -1   24.10    2.10
 -15  -2  -1   18.00    2.20
 -15  -3   1    2.20    1.40
 -15  -3   1    0.20    1.70
  15   3   1    1.70    1.50
 -15   3  -1    2.40    1.80
  15  -3  -1    2.20    1.70
  15  -3   1    4.20    1.70
 -15   3   1   -0.10    1.90
 -15  -3  -1    1.40    1.70
  15   3  -1    3.00    1.50
 -15  -3  -1    2.00    1.30
  15   4   1   21.50    2.00
  15  -4  -1   22.60    2.40
 -15  -4   1   23.70    2.10
 -15  -4   1   19.60    2.30
 -15   4  -1   24.50    2.50
  15  -4   1   22.90    2.40
 -15  -4  -1   21.70    2.30
  15   4  -1   16.60    1.90
 -15   4   1   21.80    2.40
 -15  -5   1   27.40    2.50
  15  -5  -1   24.40    2.60
 -15   5  -1   22.10    2.70
  15  -5   1   30.00    2.60
 -15  -5  -1   26.00    2.40
 -15   5   1   25.30    2.70
 -15  -6   1   25.40    2.50
 -15   6  -1   25.80    2.70
  15  -6  -1   21.40    2.60
 -15  -6  -1   27.10    2.50
 -15   6   1   27.30    2.70
  15  -6   1   28.90    2.70
 -15   7  -1   89.89    5.60
 -15  -7   1   94.59    5.40
  15  -7  -1   94.09    5.60
 -15   7   1   89.69    5.60
 -15  -7  -1   92.79    5.30
  15  -7   1   93.89    5.60
  15  -8  -1   60.79    4.50
 -15   8  -1   63.99    4.60
 -15  -8   1   67.09    4.20
 -15  -8  -1   63.49    4.10
 -15   8   1   58.69    4.50
  15  -8   1   59.89    4.50
 -15   9  -1   26.00    2.90
  15  -9  -1   21.90    2.80
 -15  -9   1   24.30    2.40
  15  -9   1   24.80    2.80
 -15  -9  -1   29.80    2.50
 -15   9   1   22.00    2.80
 -15  10  -1   20.20    2.80
 -15 -10   1   26.90    2.40
  15 -10  -1   23.50    2.90
 -15  10   1   23.20    2.90
 -15 -10  -1   25.40    2.40
  15 -10   1   20.40    2.70
 -15 -11   1   23.60    2.30
 -15  11  -1   22.60    2.80
  15 -11  -1   22.30    2.80
 -15  11   1   17.70    2.70
  15 -11   1   21.30    2.80
 -15 -11  -1   24.60    2.30
 -15 -12   1    1.30    1.70
 -15  12  -1    3.10    2.30
  15 -12  -1    2.30    2.30
 -15  12   1   -0.70    2.10
  15 -12   1    4.20    2.20
 -15 -12  -1    3.90    1.80
  15 -13  -1   17.90    2.80
 -15 -13   1   16.70    2.20
  15 -13   1   17.30    2.70
  15 -14  -1   -0.50    2.40
 -15 -14   1    3.10    1.80
  15 -14   1    2.60    2.50
  15 -14   1    1.90    1.90
  15 -15  -1   12.10    2.70
  15 -15  -1   10.90    2.40
  15 -15   1    8.50    2.80
  15 -15   1   11.00    2.30
  15 -16  -1   -0.80    2.50
  15 -16  -1    2.20    2.30
  15 -16   1    2.50    2.20
  15 -16   1    4.40    2.70
  15 -17  -1   -1.70    2.30
  15 -17  -1    2.30    2.60
  15 -17   1    1.70    2.60
  15 -17   1    4.70    2.30
 -16   0  -1    1.60    1.30
  16   0  -1   -0.70    1.60
 -16   0  -1    3.70    2.00
 -16   0   1    1.80    1.40
 -16   0   1   -0.60    1.90
  16   0   1    0.10    1.60
 -16  -1   1    2.60    1.90
  16   1   1    7.70    1.80
 -16   1  -1    2.10    2.00
  16  -1  -1    3.10    1.80
 -16   1  -1    6.00    1.30
 -16  -1   1    5.50    1.50
 -16   1   1    5.70    1.50
  16  -1   1    2.50    1.80
 -16  -1  -1    3.80    1.90
 -16   1   1    3.00    2.00
 -16  -1  -1    5.50    1.30
  16   1  -1    5.70    1.70
  16   2   1    8.00    1.70
 -16   2  -1    6.20    2.10
 -16  -2   1    8.50    1.60
 -16  -2   1    9.20    2.00
  16  -2  -1    4.40    1.90
 -16  -2  -1    9.40    1.50
  16  -2   1    8.20    1.90
 -16  -2  -1   10.10    2.00
  16   2  -1    7.20    1.80
 -16   2   1    6.70    2.10
 -16   3  -1   15.90    2.40
  16  -3  -1   11.90    2.10
  16   3   1   15.30    1.90
 -16  -3   1   13.40    1.80
 -16  -3   1   11.90    2.20
  16  -3   1   15.30    2.20
 -16   3   1   10.90    2.20
  16   3  -1    9.20    1.80
 -16  -3  -1   10.90    2.10
 -16   4  -1    5.20    2.20
 -16  -4   1    7.50    2.00
 -16  -4   1    8.60    1.70
  16  -4  -1   10.70    2.10
 -16   4   1   12.10    2.30
 -16  -4  -1   10.40    2.10
  16  -4   1    7.40    2.10
  16  -5  -1   16.70    2.40
 -16  -5   1   15.40    2.30
 -16   5  -1   18.70    2.60
  16  -5   1   18.30    2.40
 -16   5   1   20.10    2.60
 -16  -5  -1   18.30    2.30
  16  -6  -1   14.80    2.40
 -16   6  -1   15.80    2.50
 -16  -6   1   15.60    2.20
 -16   6   1   13.60    2.40
 -16  -6  -1   12.60    2.20
  16  -6   1   12.50    2.30
 -16   7  -1    7.50    2.40
  16  -7  -1    8.20    2.30
 -16  -7   1   12.50    2.20
  16  -7   1   10.50    2.30
 -16   7   1    8.90    2.30
 -16  -7  -1   11.90    2.10
 -16   8  -1   19.80    2.70
 -16  -8   1   19.20    2.40
  16  -8  -1   13.30    2.60
  16  -8   1   18.20    2.60
 -16  -8  -1   19.00    2.40
 -16   8   1   18.20    2.70
 -16   9  -1    8.50    2.40
  16  -9  -1    8.10    2.40
 -16  -9   1    9.50    2.20
 -16   9   1    7.80    2.40
  16  -9   1    9.30    2.40
 -16  -9  -1   11.90    2.10
 -16 -10   1   21.70    2.40
  16 -10  -1   19.70    2.80
 -16  10  -1   21.40    2.90
 -16 -10  -1   19.50    2.40
  16 -10   1   20.30    2.80
 -16  10   1   18.20    2.70
  16 -11  -1    5.60    2.50
 -16 -11   1    8.20    2.00
 -16  11  -1    9.10    2.50
 -16  11   1    3.80    2.40
  16 -11   1   -0.60    2.40
 -16 -11  -1    4.80    1.90
 -16 -12   1    9.40    2.10
  16 -12  -1   16.20    2.70
 -16  12  -1   13.10    2.60
 -16  12   1   10.90    2.50
  16 -12   1   11.00    2.60
 -16 -12  -1    9.70    2.10
 -16 -13   1    2.50    1.90
  16 -13  -1   -0.40    2.40
 -16 -13  -1    3.10    1.90
  16 -13   1    3.30    2.50
  16 -14  -1   12.10    2.80
  16 -14   1   13.80    2.80
  16 -15  -1    2.10    2.60
  16 -15  -1    0.10    2.20
  16 -15   1    0.30    2.50
  16 -15   1    0.20    2.10
  16 -16  -1   12.10    2.60
  16 -16  -1   14.20    2.90
  16 -16   1    8.00    2.30
  16 -16   1   10.30    3.00
  17   0   1   -0.90    1.80
 -17   0  -1   -3.10    2.00
  17   0  -1   -1.90    1.80
 -17   0   1   -1.00    1.40
 -17   0   1    1.70    2.10
 -17   1  -1   11.30    2.40
  17   1   1   14.70    2.00
 -17  -1   1    9.10    2.30
 -17  -1   1   12.70    1.80
  17  -1  -1   10.50    2.10
 -17  -1  -1   13.90    1.70
  17   1  -1    9.40    2.00
 -17   1   1    8.90    1.70
  17  -1   1   14.80    2.10
 -17   1   1   11.40    2.40
 -17  -1  -1   16.40    2.30
  17   2   1    8.20    1.90
 -17   2  -1    5.40    2.30
  17  -2  -1    7.60    2.10
 -17  -2   1   10.30    2.20
 -17  -2   1    8.20    1.70
 -17  -2  -1    8.50    1.60
 -17  -2  -1    7.50    2.20
 -17   2   1    6.60    2.30
  17  -2   1    5.20    2.00
  17   2  -1    5.70    1.80
  17  -3  -1    6.90    2.10
 -17  -3   1    6.20    2.20
 -17  -3   1    7.10    1.70
 -17   3  -1    8.10    2.30
  17  -3   1   12.00    2.20
 -17   3   1    8.10    2.30
 -17  -3  -1   10.10    2.20
 -17   4  -1    7.20    2.40
  17  -4  -1    6.60    2.10
 -17  -4   1    6.60    2.10
 -17  -4  -1    1.00    2.10
  17  -4   1    6.00    2.20
 -17   4   1    5.30    2.30
 -17   5  -1   18.70    2.70
 -17  -5   1   18.00    2.50
  17  -5  -1   15.60    2.50
  17  -5   1   18.40    2.50
 -17   5   1   21.80    2.70
 -17  -5  -1   18.10    2.50
 -17  -6   1   27.80    2.80
 -17   6  -1   26.70    3.10
  17  -6  -1   33.10    3.10
  17  -6   1   26.50    3.00
 -17   6   1   26.90    3.10
 -17  -6  -1   33.80    2.90
  17  -7  -1   27.10    3.00
 -17   7  -1   29.50    3.10
 -17  -7   1   29.50    2.90
  17  -7   1   29.40    3.00
 -17  -7  -1   25.70    2.80
 -17   7   1   29.40    3.10
 -17  -8   1   25.40    2.70
  17  -8  -1   25.70    2.90
 -17   8  -1   24.60    3.20
 -17   8   1   23.40    3.00
 -17  -8  -1   23.90    2.70
  17  -8   1   23.10    3.00
 -17   9  -1   26.00    3.10
 -17  -9   1   25.10    2.70
  17  -9  -1   29.60    3.10
 -17   9   1   25.20    3.20
 -17  -9  -1   25.70    2.70
  17  -9   1   25.50    3.10
 -17  10  -1   31.30    3.40
  17 -10  -1   32.70    3.50
 -17 -10   1   32.70    3.00
 -17  10   1   31.30    3.40
 -17 -10  -1   34.80    2.90
  17 -10   1   29.90    3.40
 -17  11  -1   11.50    2.70
  17 -11  -1    5.60    2.60
 -17 -11   1    9.00    2.20
 -17  11   1    6.30    2.60
  17 -11   1    5.00    2.60
 -17 -11  -1    6.20    2.10
  17 -12  -1   16.20    2.90
 -17  12  -1   15.50    2.90
 -17 -12   1   17.30    2.50
 -17  12   1   17.00    2.90
  17 -12   1   17.90    2.90
 -17 -12  -1   17.90    2.40
  17 -13  -1   -1.20    2.50
 -17 -13   1    2.60    2.10
  17 -13   1    0.60    2.50
  17 -14  -1   11.30    3.00
 -17 -14   1   12.50    2.30
  17 -14   1   11.80    2.90
  17 -15  -1   -2.00    2.70
  17 -15   1    1.30    2.70
  17 -16  -1    1.70    2.40
  17 -16  -1   -3.90    2.70
  17 -16   1    3.00    2.80
 -18   0  -1   -5.00    2.10
  18   0  -1    1.40    1.90
  18   0   1    0.30    1.80
 -18   0   1   -0.60    2.20
 -18  -1   1    3.20    1.60
  18  -1  -1    3.20    2.00
 -18   1  -1    0.70    2.20
 -18  -1   1    4.00    2.30
  18   1   1    1.80    1.90
  18  -1   1    4.80    2.00
 -18   1   1   -0.40    2.30
  18   1  -1    1.70    1.90
 -18  -1  -1    2.70    2.10
 -18   2  -1    9.90    2.40
 -18  -2   1    5.40    1.60
 -18  -2   1    6.40    2.30
  18  -2  -1    2.70    2.10
 -18   2   1    3.00    2.30
 -18  -2  -1    4.90    2.20
  18  -2   1    5.60    2.10
  18  -3  -1   -1.10    2.10
 -18   3  -1    0.90    2.30
 -18  -3   1    0.40    1.60
 -18  -3   1    0.40    2.10
 -18  -3  -1   -2.30    2.10
 -18   3   1   -1.90    2.30
  18  -3   1    3.70    2.10
 -18   4  -1    5.70    2.40
 -18  -4   1    7.50    2.30
  18  -4  -1    4.40    2.30
 -18  -4  -1    7.90    2.30
  18  -4   1    5.30    2.20
 -18   4   1    5.20    2.50
 -18  -5   1    0.90    2.20
 -18   5  -1    2.60    2.40
  18  -5  -1    4.70    2.30
 -18  -5  -1    2.10    2.10
 -18   5   1    2.40    2.40
  18  -5   1    4.80    2.20
  18  -6  -1    7.50    2.40
 -18  -6   1    8.10    2.30
 -18   6  -1    8.30    2.60
 -18  -6  -1    9.20    2.40
 -18   6   1    2.10    2.40
  18  -6   1    8.00    2.40
 -18  -7   1    3.50    2.20
  18  -7  -1    2.60    2.40
 -18   7  -1    0.30    2.50
 -18  -7  -1    6.70    2.20
 -18   7   1    4.60    2.60
  18  -7   1    1.80    2.40
  18  -8  -1    4.00    2.40
 -18  -8   1    3.60    2.20
 -18   8  -1    6.50    2.60
 -18  -8  -1    3.00    2.20
  18  -8   1    3.60    2.40
 -18   8   1    4.90    2.60
  18  -9  -1    8.40    2.70
 -18   9  -1   13.80    2.90
 -18  -9   1   12.60    2.40
  18  -9   1   13.10    2.70
 -18  -9  -1   14.30    2.40
 -18   9   1   11.90    2.80
 -18  10  -1    8.20    2.70
 -18 -10   1    9.90    2.40
  18 -10  -1    6.20    2.60
 -18  10   1    9.30    2.70
  18 -10   1    8.00    2.80
 -18 -10  -1    6.90    2.30
 -18  11  -1    9.50    2.80
 -18 -11   1   10.80    2.40
  18 -11  -1   11.00    2.80
 -18 -11  -1   10.60    2.30
 -18  11   1    9.20    2.80
  18 -11   1   12.60    2.90
  18 -12  -1    4.80    2.80
 -18  12  -1    9.20    2.90
 -18 -12  -1    8.60    2.30
 -18  12   1    6.10    2.70
  18 -12   1    2.20    2.60
  18 -13  -1   14.10    2.90
  18 -13   1    8.80    2.80
  18 -14  -1    3.50    2.80
  18 -14   1   -0.10    2.70
  19   0  -1    6.90    2.20
  19   0   1    3.60    2.00
 -19   0  -1    6.90    2.50
 -19   0   1   -0.90    2.40
 -19   1  -1   -0.90    2.50
  19  -1  -1   -0.80    2.00
 -19  -1   1    0.00    2.40
 -19   1   1    1.90    2.50
  19  -1   1   -0.10    2.00
 -19  -1  -1    3.90    2.30
 -19  -2   1    4.50    2.40
  19  -2  -1    8.10    2.30
 -19   2  -1    8.10    2.60
  19  -2   1    3.80    2.20
 -19   2   1    5.90    2.50
 -19  -2  -1    7.40    2.40
 -19   3  -1    8.10    2.60
 -19  -3   1    8.90    2.50
  19  -3  -1    2.90    2.30
 -19  -3  -1    8.10    2.40
 -19   3   1    6.00    2.60
  19  -3   1    6.30    2.30
 -19   4  -1    1.10    2.60
 -19  -4   1    3.80    2.40
  19  -4  -1   -0.70    2.30
 -19   4   1    0.20    2.50
 -19  -4  -1    1.60    2.30
  19  -4   1    1.10    2.20
 -19  -5   1    3.40    2.40
 -19   5  -1    3.90    2.60
  19  -5  -1    2.40    2.50
 -19   5   1    6.00    2.70
  19  -5   1    4.10    2.30
 -19  -5  -1    4.00    2.40
  19  -6  -1   14.40    2.80
 -19   6  -1   16.40    3.00
 -19  -6   1   17.60    2.90
 -19   6   1   11.40    3.00
  19  -6   1   15.00    2.70
 -19  -6  -1   15.70    2.70
  19  -7  -1   -0.40    2.40
 -19  -7   1    1.30    2.30
 -19   7  -1   -1.50    2.50
 -19  -7  -1    0.70    2.30
 -19   7   1   -3.70    2.60
  19  -7   1   -2.20    2.30
 -19  -8   1   11.30    2.60
  19  -8  -1    8.90    2.70
 -19   8  -1   11.90    2.80
  19  -8   1    9.80    2.80
 -19  -8  -1   10.20    2.50
 -19   8   1    5.70    2.80
 -19   9  -1   23.10    3.30
 -19  -9   1   29.20    3.00
  19  -9  -1   21.10    3.40
  19  -9   1   26.50    3.30
 -19  -9  -1   27.40    3.10
 -19   9   1   21.20    3.30
  19 -10  -1   17.80    3.30
 -19 -10   1   20.10    2.80
 -19  10  -1   19.50    3.20
  19 -10   1   17.70    3.10
 -19 -10  -1   16.90    2.70
 -19  10   1   19.30    3.20
 -19  11  -1    7.00    2.80
  19 -11  -1    6.90    3.00
  19 -11   1    9.10    2.90
 -19  11   1    7.70    2.90
  19 -12  -1    0.60    2.80
 -19 -12   1    2.90    2.30
 -19  12  -1    2.00    2.80
 -19  12   1   -0.10    2.70
  19 -12   1    5.60    2.80
  19 -13  -1    9.80    3.10
  19 -13   1    8.60    3.00
  19 -14  -1   -3.60    2.70
 -20   0   1    2.20    2.60
 -20   0  -1    2.20    2.70
 -20  -1   1    3.50    2.70
 -20   1  -1    6.20    2.70
  20  -1  -1    3.90    2.30
 -20   1   1    5.70    2.80
 -20  -1  -1    2.20    2.50
  20  -1   1    1.20    2.20
  20  -2  -1    1.00    2.20
 -20   2  -1    3.70    2.70
 -20  -2   1    0.10    2.60
 -20  -2  -1    3.30    2.50
  20  -2   1    0.50    2.30
 -20   2   1   -0.20    2.70
 -20   3  -1    7.30    2.90
 -20  -3   1    4.50    2.60
  20  -3  -1    1.90    2.40
  20  -3   1    4.10    2.40
 -20   3   1   12.40    2.90
 -20  -3  -1    8.60    2.60
  20  -4  -1   -1.90    2.30
 -20   4  -1    5.00    2.70
 -20  -4   1   -0.60    2.60
 -20   4   1    3.70    2.90
  20  -4   1    5.90    2.40
 -20  -4  -1    3.60    2.50
 -20   5  -1    4.10    2.90
  20  -5  -1   -1.20    2.40
 -20  -5   1    4.10    2.70
 -20  -5  -1    3.80    2.40
 -20   5   1    6.50    2.80
  20  -5   1   -1.50    2.40
  20  -6  -1    6.50    2.60
 -20  -6   1    2.90    2.50
 -20   6  -1    0.20    2.70
 -20  -6  -1    4.80    2.70
  20  -6   1    7.10    2.60
 -20   6   1    9.10    2.90
  20  -7  -1    6.90    2.70
 -20  -7   1    7.00    2.80
 -20   7  -1    4.70    2.90
  20  -7   1    7.10    2.70
 -20   7   1    6.30    2.90
 -20  -7  -1    9.50    2.60
 -20  -8   1    5.30    2.70
 -20   8  -1    3.90    2.90
  20  -8  -1    5.90    2.70
  20  -8   1    2.60    2.60
 -20   8   1    7.00    2.90
 -20  -8  -1    7.50    2.60
 -20   9  -1    4.60    2.90
 -20  -9   1    3.50    2.50
 -20   9   1    0.10    2.90
 -20  -9  -1    3.10    2.50
  20  -9   1    0.40    2.70
 -20 -10   1   11.10    2.70
 -20  10  -1    3.40    3.00
  20 -10  -1    5.20    2.90
 -20 -10  -1    9.30    2.50
 -20  10   1    8.30    3.00
 -20  11  -1   12.20    3.10
  20 -11  -1    9.80    3.10
 -20 -11   1    9.20    2.60
 -20  11   1    7.70    3.10
  20 -11   1    9.80    3.10
 -20 -11  -1    7.70    2.60
 -20 -12   1    3.40    2.50
 -20  12  -1    8.80    3.10
  20 -12   1    6.80    3.00
 -21   0   1   -4.20    2.70
 -21   0  -1    0.40    2.80
 -21  -1   1    1.90    2.80
 -21   1  -1    3.80    2.90
 -21   1   1    3.40    2.90
 -21  -1  -1    4.30    2.80
 -21  -2   1    3.20    2.80
  21  -2  -1    5.40    2.50
 -21   2  -1    9.90    3.00
 -21   2   1    2.60    2.90
 -21  -2  -1    5.90    2.80
 -21  -3   1   10.40    2.90
 -21   3  -1    7.30    3.10
  21  -3  -1    7.00    2.70
 -21  -3  -1    7.90    2.90
  21  -3   1    9.20    2.60
 -21   3   1    3.40    2.90
 -21   4  -1   15.30    3.20
 -21  -4   1   13.10    3.00
  21  -4   1    7.00    2.70
 -21   4   1   16.40    3.30
 -21  -4  -1   18.20    3.10
  21  -5  -1    8.40    2.70
 -21   5  -1   10.80    3.20
 -21  -5   1    9.20    2.90
  21  -5   1    7.40    2.70
 -21  -5  -1    9.10    2.80
 -21   5   1   10.80    3.10
 -21   6  -1    2.70    3.00
 -21  -6   1    5.30    2.80
  21  -6  -1    4.10    2.70
 -21   6   1    4.70    3.00
 -21  -6  -1    6.50    2.80
  21  -7  -1    8.70    2.90
 -21  -7   1    9.30    2.80
 -21  -7  -1    9.00    2.90
 -21   7   1    9.10    3.20
 -21   8  -1    9.40    3.20
  21  -8  -1    5.20    2.90
 -21  -8   1   10.70    2.80
  21  -8   1    8.20    2.90
 -21   8   1   12.20    3.40
 -21  -8  -1   10.70    2.80
  21  -9  -1    7.00    3.00
 -21   9  -1   12.30    3.30
 -21  -9   1    9.50    2.90
 -21  -9  -1   11.00    2.80
 -21  10  -1   15.50    3.40
  21 -10  -1   13.20    3.30
 -21  10   1   15.00    3.40
  21 -10   1   14.10    3.20
 -21 -10  -1   13.00    2.80
  21 -11  -1    9.40    3.20
 -21 -11   1    8.30    2.80
  21 -11   1    5.90    3.10
 -21  11   1    5.10    3.20
 -22   0  -1    4.50    3.00
 -22   0   1    1.00    3.10
 -22   1  -1   -0.50    3.00
 -22  -1   1    4.30    3.00
 -22  -1  -1    3.20    3.00
 -22   1   1    7.60    3.10
 -22   2  -1    2.60    3.10
 -22  -2   1    1.60    2.80
 -22   2   1    2.80    2.90
 -22  -2  -1    3.00    2.90
 -22   3  -1    4.70    3.10
 -22  -3   1    3.50    2.90
 -22  -3  -1    4.80    2.90
 -22   3   1    5.30    3.10
 -22  -4   1    3.30    2.90
 -22   4  -1    3.80    3.20
 -22   4   1    2.80    3.20
 -22  -4  -1    0.50    2.90
 -22  -5   1    1.50    2.90
 -22   5  -1   -1.80    3.00
  22  -5   1    0.50    2.60
 -22   5   1    4.60    3.20
 -22   6  -1    7.90    3.30
  22  -6  -1    5.00    2.80
 -22  -6  -1    6.10    2.90
 -22   6   1    2.10    3.10
 -22   7  -1    0.10    3.10
 -22   7   1    6.70    3.20
  22  -8  -1    6.70    3.10
 -22  -8   1    9.60    3.10
  22  -8   1   11.80    3.10
 -22  -8  -1    8.70    3.00
 -22   8   1    6.30    3.40
 -22   9  -1    3.70    3.20
  22  -9  -1   -0.10    2.90
 -22   9   1   -0.80    3.10
 -22  -9  -1   -2.30    2.90
  22  -9   1    1.90    2.90
  22 -10  -1    7.30    3.20
 -23   0   1   -0.30    3.20
 -23   0  -1   -0.40    3.00
 -23  -1   1    3.50    3.20
 -23   1  -1    2.30    3.20
 -23  -1  -1    0.40    3.00
 -23   1   1   -1.90    3.10
 -23  -2   1    5.50    3.10
 -23   2  -1   -0.90    3.10
 -23  -2  -1   -0.10    3.00
 -23   2   1    8.10    3.30
 -23   3  -1    6.40    3.30
 -23  -3   1    5.00    3.20
 -23  -3  -1    3.50    3.10
 -23   3   1    7.10    3.30
 -23   4  -1    5.10    3.30
 -23  -4   1    3.90    3.20
 -23   4   1    7.60    3.40
 -23  -4  -1    7.10    3.10
 -23  -5   1    3.90    3.00
 -23   5   1    3.80    3.30
 -23  -5  -1    4.90    3.10
  23  -5   1    2.20    2.70
 -23   6  -1    3.40    3.30
 -23  -6   1    0.60    3.10
 -23  -6  -1    5.50    3.20
 -23   6   1    6.70    3.40
 -23   7  -1    5.00    3.50
 -23   7   1    7.20    3.40
 -24   0   1    3.60    3.50
 -24   1  -1    1.60    3.40
 -24  -1  -1    2.10    3.40
 -24   1   1    0.80    3.30
 -24  -2   1    2.40    3.40
 -24  -2  -1    9.70    3.40
 -24   3  -1   -0.70    3.40
 -24  -3   1    3.30    3.30
 -24  -3  -1    6.40    3.30
 -24   4  -1    0.30    3.50
 -24  -4  -1   -2.60    3.30
   0   0  -2   -0.10    0.10
   0   0   2   -0.10    0.10
   0  -1   2    0.10    0.10
   0  -1  -2   -0.10    0.10
   0   1   2    0.10    0.10
   0   1  -2    0.00    0.10
   0  -1  -2    0.00    0.10
   0  -1   2    0.10    0.10
   0   1  -2    0.00    0.20
   0   1  -2    0.10    0.20
   0   1   2    0.00    0.10
   0  -1   2    0.20    0.20
   0  -1   2    0.00    0.10
   0  -2   2 1155.28   50.89
   0   2  -2 1234.58   50.89
   0   2   2 1015.50   50.79
   0  -2  -2 1034.30   50.79
   0   2  -2 1101.29   50.79
   0   2   2  964.50   50.79
   0  -2   2 1050.39   49.60
   0  -2   2 1118.39   50.89
   0  -3  -2    0.40    0.30
   0   3   2   -0.20    0.30
   0  -3  -2   -0.40    0.40
   0   3  -2   -0.30    0.40
   0  -3   2    0.10    0.40
   0  -3   2   -0.50    0.40
   0  -3  -2   -0.20    0.10
   0   3   2   -0.20    0.30
   0  -3   2   -0.20    0.40
   0  -4  -2  895.11   40.40
   0  -4  -2  837.82   41.40
   0  -4   2  862.91   41.40
   0   4  -2  953.00   41.40
   0  -4   2  864.91   40.40
   0  -4   2  880.11   41.40
   0  -5  -2    0.50    0.50
   0   5  -2    0.70    0.60
   0  -5  -2   -0.20    0.10
   0  -5   2   -0.70    0.50
   0  -5   2   -0.90    0.60
   0  -5   2    0.30    0.60
   0  -5  -2   -1.50    0.70
   0  -6  -2  744.53   33.10
   0  -6   2  715.83   33.90
   0   6  -2  733.53   33.90
   0  -6   2  714.03   33.10
   0  -6  -2  728.23   33.80
   0  -6   2  689.33   33.90
   0  -7  -2    0.50    0.60
   0  -7  -2    0.00    0.20
   0   7  -2    0.30    0.60
   0  -7  -2   -0.20    0.80
   0  -7   2   -1.30    0.60
   0  -7   2    0.80    0.80
   0  -7   2   -0.90    0.70
   0  -8  -2  295.77   13.50
   0   8  -2  284.77   13.70
   0  -8  -2  293.57   13.70
   0  -8   2  274.97   13.70
   0  -8   2  299.47   13.50
   0  -8   2  290.17   13.70
   0  -9   2   -2.10    0.70
   0  -9   2   -2.20    0.80
   0  -9  -2    0.40    0.80
   0  -9  -2   -0.30    0.20
   0  -9   2   -0.30    1.00
   0   9  -2   -1.20    0.70
   0  -9  -2   -1.50    1.10
   0 -10   2  367.66   17.60
   0  10  -2  353.26   17.60
   0 -10  -2  395.46   17.60
   0 -10  -2  412.96   17.40
   0 -10   2  323.07   17.60
   0 -10   2  383.66   17.30
   0  11  -2   -1.30    0.80
   0 -11   2    0.20    0.90
   0 -11  -2   -2.00    1.20
   0 -11  -2   -0.50    0.80
   0 -11  -2   -0.10    0.30
   0 -11   2   -0.60    0.90
   0 -11   2   -0.40    1.20
   0 -12   2   43.60    2.90
   0  12  -2   39.80    2.50
   0 -12   2   37.80    2.50
   0 -12  -2   51.69    3.00
   0 -12   2   45.90    2.60
   0 -13  -2   -1.10    1.40
   0 -13   2   -0.40    1.00
   0 -13   2   -1.10    1.40
   0 -13  -2   -0.20    1.00
   0 -14   2    8.20    1.30
   0 -14  -2    8.10    1.80
   0 -14  -2    9.40    1.20
   0 -14   2    9.00    1.70
   0 -15  -2    1.50    1.10
   0 -15  -2    0.20    1.70
   0 -15   2   -1.90    1.70
   0 -15   2    1.30    1.30
   0 -16   2   14.40    1.70
   0 -16  -2   16.90    1.60
   0 -16   2   18.20    2.30
   0 -16  -2   12.90    2.20
   0 -17  -2   -1.10    1.20
   0 -17   2    0.50    1.40
   0 -17   2    0.20    2.00
   0 -17  -2   -2.60    2.00
   0 -18  -2   15.30    2.50
   0 -18   2   14.70    2.50
   0 -18   2   10.10    1.70
   0 -18  -2   12.20    1.60
   0 -19   2    0.40    1.50
   0 -19  -2   -1.30    2.30
   0 -19  -2    2.80    1.40
   0 -19   2   -4.80    2.20
   0 -20  -2   17.70    1.90
   0 -20   2   23.10    3.00
   0 -20  -2   17.50    2.90
   0 -20   2   16.70    2.00
   0 -21   2    0.20    2.70
   0 -21   2   -2.30    1.70
   0 -21  -2    3.00    2.80
   0 -22  -2    2.40    3.00
   0 -22   2    6.80    3.00
   1   0  -2  121.99    5.80
  -1   1  -2   31.90    1.60
   1  -1  -2   31.20    1.60
  -1   1  -2   34.70    1.60
  -1  -1  -2   31.80    1.60
   1   1  -2   34.50    1.60
  -1   1   2   30.80    1.60
   1  -1   2   34.50    1.60
   1   1  -2   30.00    1.60
  -1  -1  -2   31.70    1.60
   1  -2  -2    9.10    0.60
  -1   2  -2   11.00    0.70
  -1  -2   2   11.40    0.70
   1  -2  -2    6.80    0.60
  -1   2  -2    9.10    0.70
  -1  -2   2    8.80    0.60
  -1   2   2    8.70    0.60
   1   2  -2   10.60    0.70
  -1   2   2    9.30    0.60
   1  -2   2    8.20    0.70
   1  -2   2   10.70    0.60
   1  -2   2    9.50    0.60
  -1  -2  -2   10.10    0.60
  -1  -3   2    3.50    0.40
  -1   3  -2    1.20    0.50
   1  -3  -2    0.50    0.40
  -1  -3   2    2.30    0.40
   1  -3  -2   -0.30    0.40
  -1  -3   2    1.60    0.50
   1  -3   2    1.50    0.50
  -1   3   2    0.70    0.50
   1  -3   2    1.30    0.40
  -1  -3  -2    1.90    0.50
   1  -3   2    0.30    0.50
  -1   4  -2  225.08   10.60
  -1  -4   2  225.28   10.40
   1  -4  -2  234.38   10.40
  -1  -4   2  237.58   10.60
   1  -4  -2  208.88   10.60
   1  -4  -2  209.28   10.60
  -1  -4  -2  227.08   10.40
   1  -4   2  224.48   10.60
   1  -4   2  206.48   10.60
   1   4  -2  234.68   10.60
   1  -4   2  222.28   10.30
  -1   4   2  224.38   10.60
   1  -5  -2   65.79    3.10
   1  -5  -2   53.19    3.10
  -1  -5   2   67.19    3.10
  -1   5  -2   67.89    3.10
  -1  -5   2   63.79    3.10
  -1  -5  -2   62.49    3.10
   1  -5   2   58.59    3.10
   1  -5   2   56.89    3.10
  -1   5   2   51.89    3.10
   1  -5   2   68.79    3.10
  -1  -6   2  312.67   14.30
   1  -6  -2  293.57   14.00
  -1  -6   2  306.17   14.00
   1  -6  -2  298.87   14.30
  -1   6  -2  305.17   14.30
  -1   6   2  296.97   14.30
   1  -6   2  304.17   14.00
   1   6  -2  307.97   14.30
   1  -6   2  288.47   14.30
  -1  -6  -2  292.57   14.00
   1  -6   2  316.67   14.30
  -1  -7   2   16.00    1.40
   1  -7  -2    9.00    0.90
  -1   7  -2   13.10    1.20
  -1  -7   2   15.50    1.10
   1  -7  -2   16.90    1.40
   1  -7  -2   11.30    1.00
   1  -7   2   10.70    1.00
   1  -7   2   10.70    1.00
   1   7  -2   14.40    1.10
  -1  -7  -2   13.10    1.20
   1  -7   2   12.90    1.10
  -1   7   2   12.00    1.10
   1  -8  -2  105.39    5.00
  -1  -8   2   97.89    4.90
  -1  -8   2   98.99    4.90
   1  -8  -2  103.89    4.90
  -1   8  -2   97.09    4.90
  -1   8   2   98.59    4.80
   1  -8   2   93.49    4.90
   1  -8   2  100.69    4.90
  -1  -8  -2  103.19    4.90
   1   8  -2   94.69    4.80
   1  -8   2   98.99    4.90
  -1  -9   2  240.98   11.30
  -1  -9   2  242.78   11.40
   1  -9  -2  256.87   11.40
  -1   9  -2  229.38   11.40
   1  -9  -2  248.88   11.30
   1   9  -2  231.08   11.40
   1  -9   2  238.38   11.50
   1  -9   2  221.58   11.50
  -1  -9  -2  247.68   11.30
   1  -9   2  251.97   11.30
  -1   9   2  229.78   11.40
   1 -10  -2  318.07   14.10
   1 -10  -2  333.27   14.30
  -1 -10   2  292.97   14.30
  -1 -10   2  312.57   14.10
  -1  10  -2  284.47   14.30
  -1 -10  -2  316.47   14.10
   1 -10   2  309.87   14.10
   1 -10   2  278.87   14.30
  -1  10   2  284.47   14.20
   1 -10   2  308.97   14.30
  -1 -10  -2  294.77   14.30
   1  10  -2  283.97   14.20
  -1 -11   2  453.65   20.50
  -1  11  -2  400.46   20.80
   1 -11  -2  461.75   20.50
  -1 -11   2  439.56   20.80
   1 -11  -2  488.45   20.80
  -1 -11  -2  429.36   20.80
   1 -11   2  449.56   20.50
  -1 -11  -2  465.55   20.50
   1 -11   2  445.36   20.90
   1 -11   2  390.66   20.80
  -1  11   2  422.86   20.80
  -1  12  -2  156.88    8.50
  -1 -12   2  171.28    8.50
   1 -12  -2  184.48    8.60
   1 -12  -2  188.98    8.60
  -1 -12   2  175.18    8.60
   1 -12   2  177.38    8.60
   1 -12   2  174.58    8.60
  -1 -12  -2  178.48    8.60
  -1 -12  -2  181.88    8.50
   1 -13  -2  259.57   12.30
  -1 -13   2  260.37   12.30
  -1 -13   2  247.98   12.30
   1 -13  -2  274.27   12.40
   1 -13   2  249.28   12.40
  -1 -13  -2  255.67   12.30
  -1 -13  -2  256.07   12.30
   1 -13   2  255.17   12.20
   1 -14  -2  103.39    5.60
  -1 -14   2   95.69    5.30
   1 -14  -2  104.29    5.30
  -1 -14   2  102.99    5.60
  -1 -14  -2  100.89    5.60
   1 -14   2  108.79    5.50
   1 -14   2  104.99    5.40
   1 -15  -2  147.09    7.30
  -1 -15   2  142.19    7.30
   1 -15  -2  143.39    7.00
  -1 -15   2  133.79    6.90
  -1 -15  -2  146.89    7.30
   1 -15   2  127.49    7.00
   1 -15   2  139.79    7.20
  -1 -15  -2  137.59    6.90
   1 -16  -2   55.39    3.90
   1 -16  -2   50.39    3.20
  -1 -16   2   45.80    3.10
  -1 -16   2   50.59    3.70
  -1 -16  -2   52.99    3.80
   1 -16   2   47.90    3.20
   1 -16   2   48.70    3.70
  -1 -16  -2   46.10    2.90
   1 -17  -2   86.59    5.10
   1 -17  -2   82.99    4.50
  -1 -17   2   74.69    4.40
  -1 -17   2   77.99    4.90
   1 -17   2   80.29    5.00
   1 -17   2   77.89    4.50
  -1 -17  -2   82.49    5.10
  -1 -18   2   34.30    2.80
   1 -18  -2   37.20    3.40
  -1 -18   2   41.60    3.30
   1 -18  -2   36.70    2.80
  -1 -18  -2   33.80    2.60
   1 -18   2   40.20    3.30
  -1 -18  -2   40.80    3.30
   1 -18   2   32.60    2.90
   1 -19  -2   39.60    3.60
   1 -19  -2   35.30    3.00
  -1 -19   2   34.10    2.90
  -1 -19   2   39.10    3.40
   1 -19   2   36.20    3.10
  -1 -19  -2   51.69    4.20
   1 -19   2   45.20    3.60
   1 -20  -2   13.60    1.90
  -1 -20   2   13.80    2.90
   1 -20  -2   14.50    2.90
  -1 -20   2   13.30    1.80
  -1 -20  -2   19.90    2.90
   1 -20   2   16.40    2.80
   1 -20   2   13.10    2.00
   1 -21  -2   17.90    2.10
   1 -21  -2   20.60    3.20
  -1 -21   2   18.00    3.20
   1 -21   2   21.90    3.20
  -1 -21  -2   22.70    3.30
   1 -21   2   19.10    2.20
  -1 -22   2    6.80    3.10
   1 -22  -2    7.80    3.10
   1 -22   2   11.90    3.10
  -1 -22  -2    8.50    3.20
   1 -22   2    9.30    2.00
   2   0  -2    3.50    0.40
   2   0  -2    3.50    0.40
  -2   0  -2    3.70    0.40
   2   0   2    4.10    0.40
  -2   0   2    4.50    0.40
  -2   0  -2    4.40    0.40
   2   0   2    3.90    0.40
   2  -1  -2 1128.79   53.79
  -2  -1   2 1122.79   53.69
  -2   1  -2 1174.18   53.79
   2  -1  -2 1044.50   53.69
  -2  -1   2 1227.08   54.99
  -2  -1   2 1215.68   53.79
   2   1   2 1095.49   53.69
   2   1   2 1181.38   53.69
  -2   1  -2 1168.58   53.79
   2  -1   2 1206.08   53.79
  -2  -1  -2 1093.29   53.69
   2  -1   2 1140.19   53.79
   2   1  -2 1160.48   53.79
  -2   1   2 1066.29   53.69
   2   1  -2 1115.99   53.79
  -2   1   2 1140.99   53.79
  -2  -1  -2 1207.08   52.39
   2  -2  -2    4.70    0.50
  -2  -2   2    6.30    0.60
  -2  -2   2    6.50    0.50
  -2  -2   2    6.00    0.40
  -2   2  -2    5.40    0.60
  -2  -2   2    5.60    0.50
   2  -2  -2    4.60    0.50
   2   2  -2    6.60    0.50
  -2  -2  -2    5.30    0.50
   2  -2   2    5.00    0.50
  -2   2   2    4.70    0.50
   2  -2   2    4.30    0.50
   2  -3  -2  164.58    8.30
   2  -3  -2  170.88    8.30
  -2  -3   2  200.18    8.30
  -2  -3   2  173.58    8.20
  -2   3  -2  176.98    8.40
   2   3  -2  176.98    8.30
  -2  -3  -2  178.88    8.20
   2  -3   2  174.38    8.10
   2  -3   2  165.68    8.30
  -2   3   2  183.28    8.40
   2  -3   2  163.48    8.40
  -2  -4   2  152.48    6.60
  -2   4  -2  140.49    6.70
  -2  -4   2  144.29    6.60
   2  -4  -2  127.49    6.70
   2  -4  -2  128.29    6.70
   2  -4   2  132.79    6.70
  -2  -4  -2  145.19    6.60
   2   4  -2  145.89    6.60
  -2   4   2  138.89    6.70
   2  -4   2  133.19    6.70
   2  -4   2  141.29    6.50
  -2  -5   2  299.47   12.70
   2  -5  -2  259.87   12.70
  -2  -5   2  272.27   12.50
   2  -5  -2  253.17   12.70
  -2   5  -2  271.17   12.80
   2   5  -2  270.57   12.70
   2  -5   2  247.68   12.70
   2  -5   2  263.37   12.80
  -2   5   2  278.47   12.70
  -2  -5  -2  273.17   12.50
   2  -5   2  267.87   12.40
  -2  -6   2  105.29    4.70
   2  -6  -2   93.79    4.80
   2  -6  -2   81.29    4.70
  -2  -6   2  100.59    4.70
  -2   6  -2  105.59    4.80
   2  -6  -2   98.49    4.70
   2  -6   2   97.29    4.80
   2  -6   2   95.89    4.70
   2   6  -2  100.79    4.60
  -2   6   2   95.79    4.80
  -2  -6  -2   91.09    4.70
   2  -6   2   93.89    4.80
   2  -7  -2  134.09    6.30
  -2  -7   2  137.09    6.30
   2  -7  -2  124.49    6.40
  -2   7  -2  132.69    6.40
   2  -7  -2  136.69    6.40
  -2  -7   2  133.69    6.30
  -2   7   2  134.69    6.40
  -2  -7  -2  128.09    6.30
   2  -7   2  132.49    6.40
   2  -7   2  132.39    6.30
   2  -7   2  119.69    6.40
  -2  -8   2   64.39    3.20
  -2   8  -2   63.19    3.30
   2  -8  -2   67.69    3.40
  -2  -8   2   64.19    3.40
   2  -8  -2   60.59    3.30
   2  -8  -2   63.09    3.30
   2  -8   2   62.59    3.40
  -2  -8  -2   69.49    3.50
   2  -8   2   65.29    3.30
   2  -8   2   57.79    3.30
  -2   8   2   62.79    3.30
   2  -9  -2  140.99    7.40
  -2  -9   2  152.68    7.30
  -2   9  -2  154.28    7.40
   2  -9  -2  154.88    7.40
  -2  -9   2  161.68    7.40
   2  -9  -2  156.98    7.40
   2  -9   2  160.38    7.30
  -2   9   2  147.59    7.40
   2  -9   2  154.88    7.40
  -2  -9  -2  157.28    7.40
   2  -9   2  135.39    7.40
   2 -10  -2   77.59    3.80
  -2 -10   2   70.79    3.60
  -2 -10   2   73.39    3.80
  -2  10  -2   69.79    3.70
   2 -10  -2   63.99    3.90
   2 -10  -2   69.49    3.70
   2 -10   2   68.69    3.70
   2 -10   2   72.19    3.80
  -2 -10  -2   71.09    3.90
  -2  10   2   65.49    3.60
   2 -10   2   76.79    3.80
   2 -11  -2   81.39    4.10
   2 -11  -2   91.49    4.00
  -2  11  -2   68.89    3.90
   2 -11  -2   71.79    3.90
  -2 -11   2   69.59    3.90
  -2 -11   2   78.49    4.10
   2 -11   2   64.59    4.00
  -2 -11  -2   82.59    4.20
   2 -11   2   75.99    4.10
  -2  11   2   73.69    3.90
   2 -11   2   78.19    4.00
  -2  12  -2    1.00    1.00
   2 -12  -2    0.00    1.30
  -2 -12   2    0.70    0.60
   2 -12  -2    1.60    1.10
  -2 -12   2    3.40    1.40
  -2 -12   2    0.00    0.90
  -2 -12  -2    1.50    1.40
   2 -12   2    3.60    1.10
  -2  12   2    2.40    0.80
   2 -12   2    3.40    1.30
  -2 -13   2   10.70    1.30
   2 -13  -2   15.20    1.40
   2 -13  -2   13.10    1.80
  -2 -13   2   12.90    1.80
   2 -13   2   11.40    1.40
  -2 -13  -2   12.70    1.80
   2 -13   2    8.30    1.60
  -2 -14   2    1.60    1.60
   2 -14  -2    2.10    1.20
   2 -14  -2    3.20    1.70
  -2 -14   2    1.30    1.10
  -2 -14  -2    1.90    1.70
   2 -14   2    0.40    1.30
   2 -14   2    0.50    1.50
  -2 -15   2    3.40    1.80
  -2 -15   2    2.10    1.20
   2 -15  -2    3.20    1.40
   2 -15  -2    2.80    1.80
   2 -15   2    3.80    1.40
   2 -15   2    1.70    1.70
  -2 -15  -2    3.60    1.80
   2 -16  -2    0.40    1.40
  -2 -16   2    0.10    1.20
   2 -16  -2   -1.50    1.80
  -2 -16   2    3.20    2.00
   2 -16   2   -0.20    1.40
   2 -16   2   -0.10    1.80
  -2 -16  -2   -4.20    1.80
   2 -17  -2    4.60    2.10
  -2 -17   2    3.30    2.10
  -2 -17   2    6.20    1.40
   2 -17  -2    5.70    1.50
   2 -17   2    6.80    2.10
   2 -17   2    5.70    1.60
  -2 -17  -2    2.40    2.10
  -2 -18   2    0.50    1.30
   2 -18  -2    3.30    1.50
   2 -18  -2   -1.50    2.20
  -2 -18   2    3.10    2.30
   2 -18   2    1.70    1.60
   2 -18   2    4.90    2.20
  -2 -18  -2    0.10    2.20
  -2 -19   2   11.60    2.60
   2 -19  -2   14.90    1.90
  -2 -19   2   12.10    1.70
   2 -19  -2   14.40    2.70
   2 -19   2   15.70    2.70
   2 -19   2   13.30    2.00
  -2 -19  -2   12.40    2.60
   2 -20  -2    2.40    2.60
  -2 -20   2   -0.60    1.50
   2 -20  -2    0.00    1.60
  -2 -20   2    1.50    2.60
   2 -20   2    3.30    2.50
   2 -20   2    0.30    1.80
  -2 -20  -2    2.30    2.50
   2 -21  -2    6.70    2.80
  -2 -21   2    8.10    2.90
   2 -21  -2    5.40    1.80
  -2 -21  -2    3.30    2.90
   2 -21   2    3.40    1.90
   2 -21   2    8.10    2.80
  -2 -22   2    5.10    3.00
   2 -22  -2    1.50    1.90
   2 -22  -2    6.30    3.10
   2 -22   2    3.00    3.00
   2 -22   2    4.30    2.00
  -2 -22  -2    2.20    2.90
  -3   0   2    1.80    0.50
   3   0   2    1.80    0.50
  -3   0  -2    1.90    0.50
  -3   0   2    1.60    0.40
   3   0  -2    1.90    0.50
  -3   0  -2    1.70    0.40
  -3   1  -2  621.34   29.30
   3   1   2  628.74   29.20
  -3   1  -2  663.53   29.30
  -3  -1   2  581.84   29.30
  -3  -1   2  673.13   29.90
   3  -1  -2  597.54   29.30
  -3  -1   2  623.94   29.30
  -3  -1  -2  617.04   29.30
  -3  -1  -2  620.54   28.50
   3   1  -2  652.33   29.30
  -3  -1  -2  591.74   29.20
   3  -1   2  623.84   29.30
  -3   1   2  605.04   29.30
  -3  -2   2   16.40    1.00
   3  -2  -2   11.10    1.10
  -3   2  -2   12.60    1.20
   3  -2  -2   15.00    1.20
  -3  -2   2   18.80    1.10
   3  -2   2   11.60    1.10
  -3   2   2   12.40    1.20
  -3  -3   2   27.10    1.50
  -3   3  -2   25.40    1.70
   3  -3  -2   24.80    1.70
  -3  -3   2   21.00    1.40
  -3  -3   2   28.00    1.70
   3  -3  -2   25.20    1.60
  -3  -3   2   26.10    1.60
   3  -3   2   24.40    1.70
  -3   3   2   26.80    1.70
  -3  -3  -2   26.10    1.60
   3   3  -2   25.00    1.50
  -3  -4   2    8.60    0.90
   3  -4  -2    5.00    0.80
  -3   4  -2    7.20    0.90
   3  -4  -2    3.80    0.90
   3  -4   2    6.50    0.90
   3   4  -2    8.10    0.70
  -3  -4  -2    8.70    0.90
  -3   4   2    7.40    0.90
  -3  -5   2   64.49    3.10
   3  -5  -2   49.80    3.10
   3  -5  -2   55.89    3.10
  -3   5  -2   63.09    3.20
  -3  -5   2   63.69    3.00
   3  -5   2   66.69    3.00
  -3   5   2   58.59    3.10
  -3  -5  -2   58.79    3.10
   3  -5   2   58.39    3.20
   3   5  -2   63.09    3.00
  -3  -6   2   26.60    1.80
   3  -6  -2   24.90    1.70
  -3  -6   2   30.50    1.60
  -3   6  -2   27.00    1.80
   3  -6  -2   28.60    1.80
   3  -6   2   28.20    1.70
  -3   6   2   28.40    1.80
   3  -6   2   27.30    1.80
  -3  -6  -2   27.70    1.80
   3  -7  -2   14.10    1.20
  -3  -7   2   13.80    1.30
   3  -7  -2   14.70    1.20
  -3  -7   2   13.10    1.10
   3  -7  -2   14.90    1.20
  -3   7  -2   13.90    1.20
   3  -7   2   13.80    1.10
   3  -7   2   12.20    1.20
  -3   7   2   15.40    1.20
  -3  -7  -2   13.40    1.30
   3  -8  -2  172.58    7.90
   3  -8  -2  156.68    8.00
  -3  -8   2  144.99    7.90
  -3   8  -2  164.18    8.10
  -3  -8   2  177.38    7.90
   3  -8  -2  175.58    8.10
  -3  -8   2  166.08    7.90
  -3   8   2  171.88    8.00
  -3  -8  -2  162.48    7.90
   3  -8   2  165.98    7.90
   3  -8   2  168.68    8.10
  -3  -9   2   13.70    1.40
  -3  -9   2   10.40    0.90
  -3   9  -2   10.80    1.20
   3  -9  -2    9.60    1.10
   3  -9  -2   12.20    1.20
  -3  -9   2   12.60    1.00
   3  -9  -2   11.30    1.40
  -3   9   2   11.50    1.10
   3  -9   2   10.60    1.30
   3  -9   2   12.00    1.20
  -3  -9  -2   12.40    1.40
   3 -10  -2  185.08    9.80
  -3 -10   2  212.68    9.70
  -3  10  -2  199.18    9.80
   3 -10  -2  206.98    9.70
   3 -10  -2  218.58    9.90
  -3 -10   2  188.88    9.70
  -3 -10   2  208.58    9.70
   3 -10   2  205.48    9.70
  -3 -10  -2  202.28    9.70
   3 -10   2  208.48    9.90
  -3  10   2  204.08    9.80
   3 -11  -2   64.19    3.70
   3 -11  -2   76.69    3.90
  -3  11  -2   66.19    3.70
  -3 -11   2   59.69    3.50
  -3 -11   2   69.09    3.60
  -3 -11   2   79.39    4.00
   3 -11   2   69.39    3.80
  -3  11   2   72.19    3.70
   3 -11   2   68.69    3.80
  -3 -11  -2   73.59    3.90
   3 -12  -2  252.27   11.50
   3 -12  -2  254.97   11.60
  -3 -12   2  208.38   11.40
  -3 -12   2  246.68   11.50
  -3 -12   2  250.37   11.40
  -3  12  -2  224.98   11.50
   3 -12   2  249.58   11.40
   3 -12   2  238.48   11.60
  -3  12   2  226.08   11.50
  -3 -12  -2  248.58   11.50
  -3  13  -2   39.00    2.80
  -3 -13   2   48.10    3.10
   3 -13  -2   47.00    3.10
  -3 -13   2   43.20    2.60
   3 -13  -2   47.80    2.90
   3 -13   2   44.40    3.10
  -3 -13  -2   47.60    3.30
   3 -13   2   43.60    2.90
  -3 -14   2  136.79    7.00
   3 -14  -2  146.99    7.30
  -3 -14   2  145.09    7.30
   3 -14  -2  149.59    7.20
   3 -14   2  136.69    7.20
  -3 -14  -2  144.49    7.40
   3 -14   2  141.89    7.20
   3 -15  -2   38.00    3.20
   3 -15  -2   36.30    2.70
  -3 -15   2   37.30    2.90
  -3 -15   2   32.20    2.40
  -3 -15  -2   33.00    2.90
   3 -15   2   32.00    2.80
   3 -15   2   34.70    2.70
  -3 -16   2   97.89    5.80
   3 -16  -2  100.89    5.80
   3 -16  -2  106.29    5.40
  -3 -16  -2  101.09    5.70
   3 -16   2   97.39    5.60
   3 -16   2   94.99    5.50
  -3 -17   2   22.10    2.70
   3 -17  -2   23.80    2.20
   3 -17  -2   25.40    2.70
  -3 -17  -2   23.00    2.80
   3 -17   2   23.90    2.20
   3 -17   2   23.90    2.60
  -3 -18   2   53.89    4.30
   3 -18  -2   51.79    3.60
   3 -18  -2   58.39    4.30
  -3 -18  -2   52.19    4.30
   3 -18   2   46.90    3.70
   3 -18   2   45.90    4.00
  -3 -19   2   15.40    2.80
   3 -19  -2   12.70    2.00
   3 -19  -2   10.90    2.70
  -3 -19  -2   11.20    2.70
   3 -19   2   16.90    2.70
   3 -19   2   14.80    2.10
   3 -20  -2   33.20    3.50
   3 -20  -2   32.80    2.70
  -3 -20   2   31.90    3.50
   3 -20   2   30.90    2.80
   3 -20   2   35.60    3.40
  -3 -20  -2   28.60    3.40
   3 -21  -2    6.20    2.00
   3 -21  -2    4.40    2.90
  -3 -21   2    2.40    2.80
   3 -21   2    8.30    2.10
  -3 -21  -2    9.80    2.90
   3 -21   2    5.90    2.80
  -3 -22   2   10.20    3.10
   3 -22  -2   11.90    3.20
   3 -22  -2    9.70    2.10
   3 -22   2    9.80    3.10
  -3 -22  -2    6.80    3.10
   3 -22   2   13.10    2.30
  -4   0  -2  141.69    7.40
   4   0  -2  163.88    7.50
   4   0   2  152.38    7.50
  -4   0   2  154.08    7.50
  -4   0  -2  158.98    7.50
  -4   0  -2  164.58    7.50
  -4   1  -2   40.50    2.20
  -4  -1   2   37.90    2.10
   4  -1  -2   37.00    2.20
   4   1   2   42.70    2.00
   4   1   2   37.70    2.10
  -4  -1   2   37.90    2.10
  -4  -1  -2   36.10    2.10
   4   1  -2   41.40    2.20
   4  -1   2   36.90    2.20
  -4  -1  -2   37.50    2.10
  -4   1   2   40.50    2.20
  -4  -2   2  957.80   47.20
   4   2   2 1060.99   48.20
   4   2   2  976.70   47.20
  -4  -2   2 1037.20   47.20
   4  -2  -2  983.90   47.20
  -4  -2   2 1066.69   48.20
  -4   2  -2 1022.40   47.30
   4  -2   2  963.30   47.30
  -4   2   2 1013.80   47.30
   4   2  -2  990.10   47.20
  -4  -2  -2  996.30   47.20
  -4  -2  -2 1054.09   46.10
  -4  -2  -2  957.20   47.20
  -4  -3   2   23.80    1.50
  -4   3  -2   21.00    1.80
  -4  -3   2   28.10    1.70
   4  -3  -2   24.00    1.70
   4   3  -2   29.20    1.50
  -4  -3  -2   20.90    1.40
  -4  -3  -2   28.40    1.60
  -4   3   2   25.20    1.70
   4  -3   2   20.30    1.70
   4  -4  -2  354.56   17.10
  -4  -4   2  370.36   16.70
  -4  -4   2  359.86   17.00
  -4   4  -2  367.36   17.10
  -4   4   2  366.96   17.10
  -4  -4  -2  367.86   16.70
   4  -4   2  346.57   17.10
   4   4  -2  351.76   17.00
  -4   5  -2    5.70    0.90
   4  -5  -2    2.20    0.90
   4   5  -2    8.00    0.60
  -4   5   2    0.60    0.90
   4  -5   2    4.40    0.90
  -4   6  -2  122.29    6.00
  -4  -6   2  118.99    5.90
  -4  -6   2  130.49    5.90
   4  -6  -2  117.09    6.00
  -4   6   2  120.19    6.00
   4  -6   2  126.49    5.80
   4  -6   2  118.09    6.00
  -4  -6  -2  121.89    5.90
  -4  -7   2   30.60    2.00
  -4  -7   2   27.30    1.70
   4  -7  -2   27.00    2.00
  -4   7  -2   29.10    2.00
  -4  -7  -2   27.80    2.00
   4  -7   2   30.20    2.00
   4  -7   2   30.50    1.80
  -4   7   2   27.30    2.00
   4  -8  -2   89.69    4.60
  -4   8  -2   87.69    4.50
  -4  -8   2   87.09    4.30
   4  -8  -2   92.39    4.50
  -4  -8   2   88.79    4.50
  -4  -8   2   81.29    4.30
   4  -8   2   84.19    4.60
  -4  -8  -2   90.09    4.50
   4  -8   2   88.09    4.40
  -4   8   2   93.59    4.50
  -4  -9   2   49.30    2.90
   4  -9  -2   45.30    2.80
  -4  -9   2   44.10    2.50
  -4   9  -2   49.60    2.80
   4  -9  -2   50.19    2.90
   4  -9   2   51.19    2.90
  -4  -9  -2   45.50    2.90
   4  -9   2   48.40    2.70
  -4   9   2   48.40    2.80
  -4  10  -2   11.90    1.30
   4 -10  -2   12.90    1.40
  -4 -10   2   13.70    1.30
   4 -10  -2   14.80    1.50
  -4 -10   2   15.50    1.50
  -4 -10   2   14.70    1.30
  -4  10   2   10.70    1.20
   4 -10   2   14.50    1.40
  -4 -10  -2   14.60    1.50
   4 -10   2   12.10    1.40
   4 -11  -2   80.39    4.40
   4 -11  -2   84.49    4.40
  -4 -11   2   80.29    4.40
  -4  11  -2   77.59    4.30
   4 -11   2   84.29    4.40
  -4 -11  -2   83.89    4.50
  -4  11   2   80.49    4.30
   4 -11   2   82.09    4.30
   4 -12  -2   11.70    1.60
  -4 -12   2   11.60    1.70
   4 -12  -2   11.80    1.50
  -4  12  -2    8.40    1.30
  -4  12   2   12.90    1.30
   4 -12   2   10.00    1.50
  -4 -12  -2   12.00    1.70
   4 -12   2    9.10    1.50
   4 -13  -2   32.50    2.60
  -4  13  -2   29.10    2.30
   4 -13  -2   29.00    2.50
  -4 -13   2   32.50    2.50
   4 -13   2   29.20    2.60
  -4 -13  -2   31.20    2.50
   4 -13   2   30.30    2.50
  -4 -14   2    8.60    1.80
   4 -14  -2    5.40    1.70
   4 -14  -2    7.90    1.50
  -4 -14  -2    3.70    1.80
   4 -14   2    7.10    1.60
   4 -14   2    6.90    1.70
   4 -15  -2    1.40    1.80
   4 -15  -2    5.20    1.50
  -4 -15   2    3.60    1.80
   4 -15   2    4.10    1.80
   4 -15   2    4.90    1.60
  -4 -15  -2    3.20    1.90
  -4 -16   2   15.20    2.40
   4 -16  -2   18.10    2.00
   4 -16  -2   17.30    2.30
   4 -16   2   18.70    2.30
   4 -16   2   15.60    2.00
  -4 -16  -2   13.10    2.30
   4 -17  -2   15.30    2.40
   4 -17  -2   17.00    2.10
  -4 -17   2   16.20    2.50
   4 -17   2   19.00    2.10
   4 -17   2   16.10    2.30
  -4 -17  -2   17.60    2.60
  -4 -18   2   27.10    3.00
   4 -18  -2   24.20    2.40
   4 -18  -2   22.10    2.90
   4 -18   2   26.40    2.80
   4 -18   2   23.20    2.40
  -4 -18  -2   26.60    3.00
   4 -19  -2    1.70    2.40
   4 -19  -2    6.00    1.80
  -4 -19   2    4.30    2.40
   4 -19   2    1.70    1.90
   4 -19   2    0.60    2.30
  -4 -19  -2    1.30    2.30
   4 -20  -2   14.80    2.80
   4 -20  -2    6.30    2.00
  -4 -20   2   18.00    2.90
   4 -20   2    9.70    2.10
  -4 -20  -2    9.50    2.70
   4 -20   2    7.20    2.60
  -4 -21   2    8.90    3.00
   4 -21  -2    7.30    2.90
   4 -21  -2    5.70    2.00
   4 -21   2    7.00    2.10
  -4 -21  -2    2.90    2.90
   4 -21   2    1.50    2.70
   5   0  -2 1175.58   56.59
  -5   0  -2 1255.67   57.69
   5   0   2 1218.38   56.59
  -5   0   2 1168.98   56.59
  -5   0  -2 1209.78   56.59
   5  -1  -2   18.90    1.50
   5   1   2   18.40    1.40
  -5  -1   2   19.40    1.40
  -5  -1   2   19.30    1.40
   5   1   2   19.10    1.20
  -5   1  -2   19.50    1.60
  -5  -1  -2   17.90    1.40
   5   1  -2   19.00    1.50
  -5   1   2   18.40    1.50
   5  -1   2   21.10    1.50
  -5  -1  -2   21.40    1.30
  -5  -1  -2   20.40    1.50
  -5  -2   2 1861.91   91.99
   5   2   2 2016.00   91.99
   5  -2  -2 1979.10   92.09
  -5   2  -2 2000.00   92.09
  -5  -2   2 1972.10   91.99
  -5  -2   2 2039.20   94.09
  -5  -2  -2 1962.60   91.99
  -5  -2  -2 1799.72   91.99
  -5   2   2 1916.21   92.09
   5   2  -2 2079.69   91.99
   5  -2   2 1964.70   92.09
  -5  -3   2  182.78    8.60
  -5  -3   2  182.88    8.80
   5  -3  -2  177.98    8.70
  -5  -3   2  169.38    8.60
  -5   3  -2  177.98    8.70
   5   3   2  180.08    8.60
   5  -3   2  172.68    8.70
  -5  -3  -2  193.98    8.50
  -5   3   2  182.28    8.70
  -5  -3  -2  183.08    8.60
   5   3  -2  179.08    8.60
  -5  -4   2    1.60    0.60
  -5  -4   2    3.20    0.70
  -5   4  -2    2.40    0.90
   5  -4  -2    1.70    0.90
   5   4  -2    2.20    0.60
   5  -4   2    1.40    0.90
  -5  -4  -2    1.10    0.60
  -5   4   2    1.40    0.90
  -5  -4  -2    4.30    0.80
  -5  -5   2    1.80    0.50
   5  -5  -2    2.20    0.90
  -5   5  -2    2.90    1.00
  -5  -5   2    7.30    0.90
  -5  -5   2    5.60    0.70
   5  -5   2    2.60    1.00
  -5  -5  -2    5.50    0.90
   5   5  -2    5.50    0.60
  -5   5   2    4.80    1.00
   5  -6  -2    0.80    0.90
  -5  -6   2    1.80    0.90
  -5  -6   2    1.30    0.60
  -5   6  -2    1.40    0.90
  -5   6   2    1.20    0.90
   5  -6   2    2.60    0.90
  -5  -6  -2   -0.40    0.90
   5   6  -2    1.00    0.50
  -5  -7   2  104.59    5.20
   5  -7  -2  110.09    5.30
  -5   7  -2   96.19    5.30
  -5  -7   2  102.29    5.10
  -5  -7  -2  107.29    5.20
   5  -7   2  101.09    5.10
   5  -7   2   95.09    5.30
  -5   7   2  116.09    5.30
  -5  -8   2    9.30    1.30
   5  -8  -2   11.50    1.30
  -5  -8   2   10.00    0.90
  -5   8  -2   10.10    1.30
  -5  -8   2   10.10    0.90
  -5  -8  -2   10.20    1.30
   5  -8   2   10.10    1.30
  -5   8   2   10.50    1.30
   5  -8   2   10.90    1.10
  -5  -9   2  124.69    6.70
   5  -9  -2  140.69    6.80
  -5  -9   2  144.69    6.80
   5  -9  -2  141.19    6.90
  -5   9  -2  137.29    6.90
  -5  -9   2  137.49    6.70
  -5   9   2  143.19    6.90
   5  -9   2  140.09    6.70
  -5  -9  -2  135.49    6.80
   5  -9   2  143.89    6.90
   5 -10  -2    8.80    1.30
   5 -10  -2    8.00    1.30
  -5 -10   2    7.50    1.40
  -5  10  -2    7.60    1.30
   5 -10   2    9.40    1.30
  -5  10   2    8.70    1.20
  -5 -10  -2    8.30    1.40
   5 -10   2    9.70    1.30
  -5 -11   2  131.79    6.60
  -5  11  -2  127.79    6.60
   5 -11  -2  137.29    6.60
   5 -11  -2  130.79    6.60
   5 -11   2  127.19    6.70
   5 -11   2  129.49    6.50
  -5  11   2  133.59    6.60
  -5 -11  -2  131.09    6.60
  -5 -12   2   29.70    2.60
  -5  12  -2   24.40    2.30
   5 -12  -2   30.00    2.20
   5 -12  -2   29.10    2.40
  -5  12   2   26.50    2.20
  -5 -12  -2   26.80    2.30
   5 -12   2   25.60    2.10
   5 -12   2   25.70    2.40
  -5 -13   2  160.58    7.70
  -5  13  -2  140.29    7.70
   5 -13  -2  152.28    7.70
   5 -13  -2  160.28    7.70
  -5 -13  -2  143.49    7.70
   5 -13   2  157.68    7.60
   5 -13   2  157.48    7.80
   5 -14  -2   12.30    1.90
  -5 -14   2   12.60    2.00
   5 -14  -2   10.40    1.70
   5 -14   2   10.60    1.70
  -5 -14  -2   11.70    2.00
   5 -14   2   10.40    1.80
   5 -15  -2  149.99    7.70
  -5 -15   2  151.58    7.80
   5 -15  -2  156.18    7.70
   5 -15   2  147.89    7.80
  -5 -15  -2  148.89    7.90
   5 -15   2  145.99    7.60
   5 -16  -2    9.20    1.80
   5 -16  -2   10.60    2.20
  -5 -16   2   11.30    2.20
  -5 -16  -2   12.60    2.30
   5 -16   2   11.10    2.10
   5 -16   2   10.50    1.90
   5 -17  -2   65.39    4.20
   5 -17  -2   65.09    4.50
  -5 -17   2   58.39    4.60
   5 -17   2   62.69    4.20
  -5 -17  -2   64.09    4.50
   5 -17   2   67.69    4.40
   5 -18  -2   -0.10    1.80
  -5 -18   2    2.00    2.30
   5 -18  -2    3.50    2.20
   5 -18   2    4.60    2.10
   5 -18   2    1.90    1.90
  -5 -18  -2    3.00    2.30
   5 -19  -2   48.80    4.30
  -5 -19   2   44.20    3.80
   5 -19  -2   42.40    3.70
  -5 -19  -2   44.90    3.90
   5 -19   2   47.70    3.80
   5 -19   2   49.20    3.80
  -5 -20   2    1.90    2.70
   5 -20  -2   -0.40    2.60
   5 -20  -2    6.70    2.00
  -5 -20  -2    1.80    2.70
   5 -20   2    4.20    2.50
   5 -20   2    5.30    2.10
   5 -21  -2   13.20    3.10
  -5 -21   2   18.40    3.20
   5 -21  -2   12.30    2.30
  -5 -21  -2    8.20    2.90
   5 -21   2   14.30    3.00
   5 -21   2   11.20    2.40
  -6   0  -2    3.20    0.90
   6   0   2    2.50    0.80
   6   0  -2    2.60    0.80
  -6   0  -2    3.30    0.50
  -6   0   2    2.40    0.80
  -6   1  -2    4.50    0.90
   6   1   2    4.40    0.80
   6  -1  -2    4.20    0.90
  -6  -1   2    2.90    0.80
   6   1  -2    5.60    0.90
  -6  -1  -2    3.80    0.90
   6  -1   2    3.70    0.90
  -6   1   2    4.70    0.90
  -6  -1  -2    4.80    0.60
  -6  -2   2   24.30    1.60
  -6  -2   2   30.40    1.70
   6  -2  -2   22.50    1.80
   6   2   2   19.80    1.60
  -6   2  -2   27.30    1.80
  -6  -2  -2   18.70    1.50
   6  -2   2   24.00    1.80
   6   2  -2   28.20    1.70
  -6  -2  -2   23.10    1.70
  -6   2   2   24.30    1.80
  -6   3  -2  716.13   33.00
   6   3   2  719.53   32.80
  -6  -3   2  693.63   32.90
   6  -3  -2  703.03   32.90
  -6  -3   2  695.23   33.60
  -6  -3   2  635.84   32.90
   6   3  -2  705.73   32.90
  -6  -3  -2  716.23   32.90
  -6   3   2  727.73   32.90
  -6  -3  -2  672.63   32.80
   6  -3   2  690.23   32.90
  -6  -3  -2  709.23   32.10
   6  -4  -2   92.29    4.80
  -6  -4   2   97.29    4.70
   6   4   2   94.29    4.60
  -6  -4   2   96.59    4.80
  -6   4  -2   94.69    4.80
  -6  -4   2   85.79    4.60
   6  -4   2   97.29    4.80
   6   4  -2   89.59    4.60
  -6  -4  -2   92.99    4.60
  -6   4   2   96.59    4.80
  -6  -4  -2  100.29    4.60
   6  -5  -2   84.09    4.40
  -6  -5   2   77.39    4.10
  -6   5  -2   86.29    4.40
  -6  -5   2   86.69    4.20
   6  -5   2   85.49    4.40
  -6  -5  -2   82.79    4.10
   6   5  -2   84.79    4.10
  -6  -5  -2   85.59    4.20
  -6   5   2   84.89    4.40
  -6  -6   2    4.10    0.80
  -6   6  -2    1.30    1.00
  -6  -6   2    2.30    1.00
   6  -6  -2    2.20    1.00
   6   6  -2    3.20    0.70
   6  -6   2    2.50    1.10
  -6   6   2    1.10    1.00
  -6  -6  -2    5.60    1.00
   6  -7  -2   82.39    4.20
  -6  -7   2   79.19    4.00
  -6  -7   2   73.99    4.10
  -6   7  -2   74.39    4.30
   6  -7   2   71.59    4.30
  -6  -7  -2   86.89    4.20
  -6   7   2   84.99    4.20
   6  -8  -2   39.50    2.60
  -6   8  -2   43.40    2.70
  -6  -8   2   41.10    2.70
  -6  -8   2   39.90    2.30
   6  -8   2   42.60    2.70
  -6  -8  -2   39.30    2.60
  -6   8   2   47.00    2.70
  -6  -9   2    9.80    1.00
  -6  -9   2   12.30    1.10
   6  -9  -2   10.60    1.40
  -6  -9   2   13.80    1.50
  -6   9   2   12.60    1.40
   6  -9   2   14.70    1.50
   6  -9   2   15.80    1.30
  -6  -9  -2   11.10    1.40
  -6  10  -2   39.20    2.60
  -6 -10   2   32.40    2.10
  -6 -10   2   37.90    2.60
   6 -10  -2   32.50    2.50
   6 -10  -2   34.80    2.60
  -6 -10  -2   37.10    2.60
   6 -10   2   35.00    2.40
  -6  10   2   38.20    2.50
   6 -10   2   40.60    2.60
  -6 -11   2   29.40    2.50
  -6  11  -2   32.10    2.50
   6 -11  -2   30.50    2.40
   6 -11  -2   26.20    2.40
   6 -11   2   26.80    2.30
  -6  11   2   31.90    2.40
  -6 -11  -2   31.60    2.60
   6 -11   2   31.00    2.50
   6 -12  -2   77.89    4.60
  -6 -12   2   81.49    4.60
   6 -12  -2   86.59    4.70
  -6  12  -2   82.29    4.60
  -6 -12  -2   81.79    4.70
   6 -12   2   89.59    4.70
   6 -12   2   90.09    4.60
  -6  12   2   80.59    4.50
  -6 -13   2   10.30    1.80
   6 -13  -2    9.20    1.70
   6 -13  -2    6.40    1.60
  -6  13  -2   10.10    1.60
   6 -13   2    9.60    1.70
  -6 -13  -2    8.50    1.80
   6 -13   2   11.10    1.60
   6 -14  -2   46.30    3.50
   6 -14  -2   49.00    3.40
  -6 -14   2   45.90    3.60
   6 -14   2   47.50    3.30
  -6 -14  -2   46.80    3.60
   6 -14   2   45.30    3.40
   6 -15  -2   17.70    2.20
   6 -15  -2   15.30    2.00
  -6 -15   2   15.60    2.30
   6 -15   2   15.80    2.10
   6 -15   2   18.40    2.10
  -6 -15  -2   13.10    2.30
   6 -16  -2   10.70    2.00
   6 -16  -2   10.60    2.10
  -6 -16   2   10.10    2.20
   6 -16   2   10.70    2.00
   6 -16   2   10.50    2.00
  -6 -16  -2   10.60    2.30
  -6 -17   2   43.60    3.50
   6 -17  -2   43.80    3.80
   6 -17  -2   38.20    3.50
   6 -17   2   42.40    3.50
  -6 -17  -2   42.80    3.80
   6 -17   2   45.80    3.80
   6 -18  -2   13.90    2.20
   6 -18  -2   12.00    2.50
  -6 -18   2    9.50    2.50
  -6 -18  -2   12.90    2.60
   6 -18   2   13.70    2.20
   6 -18   2    7.60    2.30
   6 -19  -2   27.20    2.70
  -6 -19   2   24.90    3.10
   6 -19  -2   25.40    3.10
   6 -19   2   22.30    2.60
  -6 -19  -2   25.80    3.10
   6 -19   2   22.20    2.90
  -6 -20   2   10.50    2.80
   6 -20  -2    8.60    2.30
   6 -20  -2    9.20    2.80
   6 -20   2    9.30    2.70
   6 -20   2    8.10    2.30
  -6 -20  -2   11.80    2.90
   6 -21  -2   14.60    3.10
   6 -21  -2   12.00    2.50
  -6 -21   2   15.40    3.10
   6 -21   2   12.90    2.50
   6 -21   2   13.80    2.90
  -6 -21  -2   11.40    3.00
   7   0   2   16.80    1.60
  -7   0   2   17.70    1.60
  -7   0  -2   19.20    1.20
  -7   0  -2   17.00    1.60
   7   0  -2   18.40    1.70
  -7  -1   2  362.66   16.90
   7   1   2  357.76   16.90
   7  -1  -2  358.06   17.00
  -7   1  -2  359.86   17.00
   7   1  -2  362.86   16.90
  -7  -1  -2  341.07   16.90
  -7   1   2  341.77   16.90
  -7  -1  -2  358.76   17.20
   7  -1   2  366.46   17.00
   7   2   2    0.20    0.80
   7  -2  -2    1.40    0.90
  -7  -2   2    2.00    0.80
  -7  -2   2   -0.20    0.80
  -7   2  -2    0.30    1.00
   7   2  -2    0.30    0.80
  -7   2   2    1.80    0.90
  -7  -2  -2   -1.70    0.70
   7  -2   2    0.00    0.90
  -7  -2  -2    0.80    0.80
   7   3   2  498.95   23.10
  -7   3  -2  499.75   23.20
   7  -3  -2  504.45   23.20
  -7  -3   2  489.55   23.60
  -7  -3   2  433.86   23.10
   7   3  -2  502.35   23.10
   7  -3   2  502.45   23.20
  -7   3   2  502.75   23.20
  -7  -3  -2  513.35   23.10
  -7  -3  -2  449.46   23.10
   7   4   2   36.30    2.10
  -7  -4   2   35.10    2.10
  -7  -4   2   39.70    2.30
  -7   4  -2   38.00    2.50
   7  -4  -2   37.90    2.50
  -7  -4   2   42.60    2.30
   7  -4   2   35.00    2.40
  -7  -4  -2   38.40    2.20
   7   4  -2   35.60    2.20
  -7   4   2   41.50    2.50
  -7  -4  -2   42.80    2.20
  -7  -4  -2   32.60    2.10
   7   5   2  116.49    5.60
  -7   5  -2  123.39    5.90
  -7  -5   2  120.59    5.80
  -7  -5   2  107.89    5.70
   7  -5  -2  114.99    5.90
  -7  -5  -2  121.09    5.70
   7  -5   2  121.39    5.90
  -7  -5  -2  114.09    5.70
   7   5  -2  113.49    5.70
  -7   5   2  114.29    5.90
  -7  -6  -2    6.10    0.90
   7  -7  -2  141.69    7.00
  -7   7  -2  136.19    7.00
  -7  -7   2  148.39    6.90
  -7  -7   2  145.29    6.80
  -7  -7  -2  135.59    6.80
   7   7  -2  135.69    6.70
  -7   7   2  146.99    7.10
   7  -7   2  133.59    7.00
  -7  -8   2   46.80    2.60
   7  -8  -2   45.90    3.00
  -7  -8   2   48.10    3.00
  -7   8  -2   44.40    3.00
  -7   8   2   45.80    3.00
  -7  -8  -2   47.80    2.90
   7  -8   2   46.50    3.00
  -7   9  -2   70.89    3.90
   7  -9  -2   64.19    3.80
  -7  -9   2   65.99    3.80
  -7  -9   2   69.49    3.60
   7  -9   2   68.79    3.90
  -7  -9  -2   65.69    3.80
   7  -9   2   65.39    3.60
  -7   9   2   71.39    3.90
  -7 -10   2   69.19    3.40
  -7  10  -2   61.69    3.80
  -7 -10   2   56.29    3.30
   7 -10  -2   64.49    3.70
  -7 -10   2   67.69    3.80
  -7  10   2   64.49    3.70
   7 -10   2   65.29    3.70
  -7 -10  -2   61.69    3.80
   7 -10   2   64.69    3.50
  -7 -11   2   12.20    1.70
  -7  11  -2   13.20    1.60
   7 -11  -2   13.60    1.60
   7 -11  -2   11.90    1.60
  -7  11   2   11.50    1.60
  -7 -11  -2    9.20    1.70
   7 -11   2   14.10    1.70
   7 -11   2   10.80    1.40
  -7 -12   2   75.49    4.40
   7 -12  -2   78.39    4.40
   7 -12  -2   77.49    4.40
  -7  12  -2   75.09    4.40
  -7 -12  -2   73.89    4.40
   7 -12   2   78.19    4.50
  -7  12   2   79.59    4.40
   7 -12   2   78.19    4.20
   7 -13  -2    2.70    1.50
  -7  13  -2    4.00    1.60
  -7 -13   2    6.10    1.70
   7 -13  -2    3.10    1.60
   7 -13   2    3.20    1.60
  -7 -13  -2    1.10    1.60
   7 -13   2    4.10    1.50
   7 -14  -2  155.78    7.60
   7 -14  -2  147.89    7.50
  -7 -14   2  146.29    7.50
   7 -14   2  148.39    7.40
  -7 -14  -2  134.29    7.50
   7 -14   2  134.39    7.50
  -7 -15   2    3.90    1.90
   7 -15  -2    1.90    1.80
   7 -15  -2    1.50    1.80
  -7 -15  -2    2.80    2.00
   7 -15   2    2.40    1.70
   7 -15   2    2.90    1.80
   7 -16  -2   86.89    5.10
  -7 -16   2   79.99    5.20
   7 -16  -2   88.29    5.20
   7 -16   2   82.69    5.10
  -7 -16  -2   87.09    5.30
   7 -16   2   87.69    5.10
  -7 -17   2    4.20    2.20
   7 -17  -2    4.30    2.10
   7 -17  -2   -0.50    1.90
   7 -17   2    1.20    2.00
  -7 -17  -2    4.70    2.20
   7 -17   2    2.90    1.90
   7 -18  -2   44.90    3.90
  -7 -18   2   52.09    4.30
   7 -18  -2   47.90    4.10
   7 -18   2   43.30    3.90
  -7 -18  -2   43.60    3.90
   7 -18   2   54.69    4.10
   7 -19  -2    1.40    2.40
  -7 -19   2    5.40    2.50
   7 -19  -2    2.70    2.10
   7 -19   2    1.10    2.30
   7 -19   2    0.60    2.10
  -7 -19  -2    4.50    2.50
   7 -20  -2   25.60    3.20
  -7 -20   2   12.30    2.90
  -7 -20  -2   13.30    3.00
   7 -20   2   17.00    2.70
   7 -20   2   24.60    3.00
   7 -21  -2    1.90    2.20
   7 -21  -2    0.90    2.80
  -7 -21   2    2.50    2.70
   7 -21   2    2.00    2.60
  -7 -21  -2    2.20    2.90
   7 -21   2    0.50    2.30
  -8   0  -2   12.80    1.30
   8   0   2   12.00    1.20
  -8   0   2   10.90    1.20
  -8   0  -2   14.30    1.00
   8   0  -2   12.40    1.30
   8  -1  -2   77.59    4.10
   8   1   2   77.49    4.10
  -8  -1   2   76.79    4.10
  -8   1  -2   81.39    4.20
  -8  -1  -2   76.29    4.10
   8  -1   2   84.19    4.10
  -8   1   2   80.79    4.20
   8   1  -2   79.99    4.10
  -8  -1  -2   78.49    4.00
   8   2   2    1.90    0.90
  -8   2  -2    2.00    1.00
  -8  -2   2    1.70    0.90
  -8  -2   2    3.60    0.80
   8  -2  -2    3.70    1.10
  -8  -2  -2    3.80    0.70
   8   2  -2    3.00    0.90
  -8  -2  -2    2.40    0.90
  -8   2   2    1.90    1.00
   8  -2   2    2.40    1.00
  -8  -3   2  173.48    8.20
  -8  -3   2  169.18    8.30
   8   3   2  171.48    8.10
   8  -3  -2  175.78    8.30
  -8   3  -2  171.28    8.30
   8   3  -2  168.78    8.20
  -8  -3  -2  149.79    8.10
   8  -3   2  168.08    8.30
  -8   3   2  166.98    8.30
  -8  -3  -2  172.38    8.20
   8  -4  -2   69.49    3.70
  -8   4  -2   71.29    3.80
  -8  -4   2   60.39    3.40
  -8  -4   2   68.29    3.50
   8   4   2   66.79    3.40
  -8  -4   2   67.29    3.60
  -8  -4  -2   58.39    3.40
   8  -4   2   66.09    3.70
  -8  -4  -2   65.69    3.50
   8   4  -2   67.39    3.50
  -8   4   2   69.09    3.70
  -8  -5   2   57.39    3.40
   8   5   2   61.59    3.30
  -8   5  -2   73.19    3.70
   8  -5  -2   67.89    3.70
  -8  -5  -2   54.79    3.30
  -8  -5  -2   66.89    3.40
  -8   5   2   69.49    3.70
  -8  -5  -2   71.49    3.50
   8   5  -2   63.29    3.40
   8  -5   2   67.49    3.70
  -8  -6   2   59.49    3.00
   8  -6  -2   59.59    3.30
  -8  -6   2   47.40    2.80
  -8   6  -2   52.19    3.30
   8   6   2   54.49    2.80
  -8   6   2   60.49    3.30
   8   6  -2   53.79    2.90
   8  -6   2   53.19    3.30
  -8  -6  -2   46.80    2.90
  -8  -7   2   55.19    3.00
  -8   7  -2   55.79    3.40
   8  -7  -2   51.19    3.30
   8   7  -2   49.80    2.80
  -8  -7  -2   58.99    2.90
   8  -7   2   51.99    3.30
  -8  -7  -2   54.09    3.20
  -8   7   2   54.69    3.30
   8  -8  -2   16.60    1.70
  -8  -8   2   15.90    1.60
  -8  -8   2   14.10    1.40
  -8   8  -2   17.10    1.70
  -8  -8  -2   17.20    1.30
   8  -8   2   15.70    1.70
  -8   8   2   15.20    1.70
  -8  -8  -2   15.20    1.60
  -8  -9   2   43.30    2.50
  -8  -9   2   40.90    2.90
  -8   9  -2   44.40    2.90
   8  -9  -2   36.10    2.80
   8  -9   2   43.40    2.90
  -8   9   2   42.00    2.90
  -8  -9  -2   39.70    2.80
  -8  10  -2   46.70    3.10
   8 -10  -2   47.60    3.10
  -8 -10   2   39.00    2.50
  -8 -10   2   48.30    3.10
  -8 -10   2   48.10    2.70
   8 -10   2   48.60    3.20
   8 -10   2   46.30    2.80
  -8 -10  -2   38.30    3.10
  -8  10   2   44.50    3.10
   8 -11  -2   66.29    4.20
  -8 -11   2   76.29    3.80
  -8  11  -2   72.89    4.20
  -8 -11   2   71.59    4.20
   8 -11   2   68.39    4.20
  -8 -11  -2   71.49    4.20
  -8  11   2   68.29    4.10
   8 -11   2   68.99    3.90
   8 -12  -2    4.20    1.60
   8 -12  -2    3.90    1.50
  -8  12  -2    5.10    1.60
  -8 -12   2    5.10    1.70
  -8 -12  -2    6.40    1.70
  -8  12   2    4.10    1.50
   8 -12   2    5.40    1.60
   8 -12   2    6.10    1.40
  -8 -13   2  118.19    6.30
  -8  13  -2  113.79    6.20
   8 -13  -2  120.89    6.20
   8 -13  -2  112.99    6.10
  -8 -13  -2  111.89    6.20
   8 -13   2  110.69    6.00
   8 -13   2  116.29    6.30
  -8 -14   2   47.80    3.70
   8 -14  -2   45.40    3.50
   8 -14  -2   42.20    3.40
  -8 -14  -2   38.20    3.50
   8 -14   2   43.20    3.50
   8 -14   2   46.70    3.40
  -8 -15   2   36.10    3.10
   8 -15  -2   42.40    3.40
   8 -15  -2   36.70    3.30
  -8 -15  -2   35.30    3.10
   8 -15   2   37.40    3.20
   8 -15   2   38.40    3.40
  -8 -16   2   22.50    2.70
   8 -16  -2   22.10    2.50
   8 -16  -2   22.20    2.60
   8 -16   2   18.20    2.40
  -8 -16  -2   17.60    2.60
   8 -16   2   20.80    2.40
  -8 -17   2    6.20    2.30
   8 -17  -2    8.70    2.30
   8 -17  -2    5.10    2.10
  -8 -17  -2    4.90    2.30
   8 -17   2   10.30    2.20
   8 -17   2    3.30    2.00
  -8 -18   2   33.90    3.40
   8 -18  -2   38.20    3.40
   8 -18  -2   38.30    3.20
  -8 -18  -2   37.60    3.50
   8 -18   2   32.90    3.20
   8 -18   2   41.10    3.30
   8 -19  -2    8.30    2.40
  -8 -19   2    9.60    2.70
   8 -19  -2   10.80    2.60
   8 -19   2   10.80    2.60
  -8 -19  -2    7.60    2.70
   8 -19   2   12.10    2.50
   8 -20  -2   18.30    3.10
   8 -20  -2   19.60    2.80
  -8 -20   2   17.10    3.20
   8 -20   2   19.50    2.80
  -8 -20  -2   13.80    3.00
   8 -20   2   22.40    3.00
   8 -21  -2    0.70    2.80
  -8 -21   2   -0.70    2.80
   8 -21  -2    6.20    2.50
  -8 -21  -2   10.10    3.10
   8 -21   2    3.20    2.70
   8 -21   2    4.00    2.60
  -9   0   2  951.60   46.10
  -9   0  -2  986.20   46.90
   9   0   2  959.20   46.00
   9   0  -2  995.70   46.10
  -9   0  -2  997.40   46.10
  -9  -1   2   85.09    4.40
  -9  -1   2   88.79    4.40
  -9   1  -2   83.29    4.40
   9   1   2   80.79    4.30
   9  -1  -2   80.09    4.40
  -9  -1  -2   78.49    4.20
   9  -1   2   83.39    4.40
  -9   1   2   85.39    4.40
  -9  -1  -2   85.69    4.40
   9   1  -2   83.89    4.40
  -9  -2   2  717.83   33.80
  -9   2  -2  714.13   33.80
   9   2   2  698.73   33.70
   9  -2  -2  707.53   33.80
  -9  -2   2  731.23   34.50
   9  -2   2  713.03   33.80
  -9  -2  -2  705.13   34.40
   9   2  -2  725.43   33.80
  -9  -2  -2  737.33   33.80
  -9   2   2  709.43   33.80
  -9  -3   2   75.79    4.00
  -9  -3   2   77.99    4.00
   9   3   2   70.19    3.90
  -9   3  -2   73.79    4.10
   9  -3  -2   76.59    4.10
   9  -3   2   69.59    4.10
   9   3  -2   76.49    4.00
  -9   3   2   78.99    4.20
  -9  -3  -2   75.39    4.00
  -9  -4   2  727.93   32.30
  -9   4  -2  679.93   32.40
  -9  -4   2  672.93   33.00
   9  -4  -2  692.43   32.40
   9   4   2  693.63   32.30
  -9   4   2  702.13   32.40
  -9  -4  -2  594.94   32.30
   9  -4   2  685.93   32.40
  -9  -4  -2  716.13   32.30
   9   4  -2  685.93   32.30
  -9   5  -2  158.08    7.60
   9   5   2  148.89    7.30
   9  -5  -2  157.68    7.60
  -9  -5   2  132.09    7.30
  -9  -5   2  161.18    7.50
  -9  -5  -2  156.18    7.40
  -9   5   2  159.98    7.60
   9  -5   2  155.68    7.60
  -9  -5  -2  129.49    7.30
   9   5  -2  159.78    7.40
   9  -6  -2  219.38   10.30
  -9   6  -2  227.38   10.40
   9   6   2  215.78   10.00
  -9  -6   2  183.98   10.10
  -9   6   2  211.58   10.30
  -9  -6  -2  215.58   10.10
   9  -6   2  219.78   10.30
   9   6  -2  226.28   10.10
  -9  -6  -2  178.88   10.00
   9  -7  -2    7.50    1.40
  -9   7  -2    4.30    1.40
  -9  -7   2    3.20    0.80
  -9  -7  -2    4.20    1.30
  -9   7   2    8.40    1.40
   9   7  -2    6.50    0.90
  -9  -7  -2    2.30    1.00
   9  -7   2    4.80    1.40
  -9  -8   2  103.29    5.10
  -9   8  -2   95.29    5.40
   9  -8  -2  107.79    5.40
   9  -8   2  100.89    5.40
   9   8  -2  103.99    4.90
  -9   8   2  108.09    5.40
  -9  -8  -2  105.19    5.20
  -9  -8  -2   82.59    4.90
  -9  -8  -2   96.09    5.00
  -9  -9   2   29.20    2.60
  -9   9  -2   28.90    2.50
  -9  -9   2   33.00    2.20
   9  -9  -2   32.00    2.60
  -9   9   2   32.80    2.60
  -9  -9  -2   22.50    1.70
   9  -9   2   29.50    2.60
  -9  -9  -2   27.50    2.00
  -9  -9  -2   29.10    2.50
   9 -10  -2   66.49    4.00
  -9  10  -2   60.99    4.00
  -9 -10   2   71.19    3.70
  -9 -10   2   66.99    4.10
  -9  10   2   63.79    4.00
  -9 -10  -2   62.39    4.00
   9 -10   2   70.29    4.10
  -9  11  -2   49.40    3.60
  -9 -11   2   62.39    3.20
   9 -11  -2   55.69    3.60
  -9 -11   2   46.70    3.60
  -9  11   2   53.69    3.60
   9 -11   2   51.99    3.30
  -9 -11  -2   53.09    3.60
   9 -11   2   54.49    3.60
  -9  12  -2   21.70    2.30
   9 -12  -2   20.70    2.20
  -9 -12   2   24.40    2.40
  -9 -12   2   24.00    2.10
   9 -12  -2   25.80    2.30
   9 -12   2   23.60    2.10
  -9 -12  -2   22.50    2.30
   9 -12   2   22.10    2.20
  -9  12   2   23.50    2.20
   9 -13  -2   72.89    4.50
  -9 -13   2   65.69    4.40
  -9  13  -2   68.49    4.40
   9 -13  -2   78.19    4.40
  -9 -13  -2   65.39    4.50
   9 -13   2   69.89    4.40
   9 -13   2   74.49    4.20
  -9 -14   2    3.80    2.00
   9 -14  -2    4.70    1.90
   9 -14  -2    3.10    1.80
  -9 -14  -2    9.80    2.00
   9 -14   2    4.50    1.90
   9 -14   2    7.10    1.70
  -9 -15   2   75.69    5.10
   9 -15  -2   83.49    5.10
   9 -15  -2   89.89    5.10
   9 -15   2   81.79    5.10
  -9 -15  -2   81.79    5.20
   9 -15   2   83.09    5.00
   9 -16  -2    3.00    2.00
   9 -16  -2    2.10    2.10
  -9 -16   2    3.80    2.20
  -9 -16  -2    3.90    2.10
   9 -16   2    1.00    1.90
   9 -16   2    5.30    1.90
   9 -17  -2   65.19    4.50
  -9 -17   2   55.89    4.60
   9 -17  -2   58.09    4.20
  -9 -17  -2   48.10    4.00
   9 -17   2   54.79    4.30
   9 -17   2   50.59    4.20
  -9 -18   2    1.90    2.50
   9 -18  -2   -0.20    2.20
   9 -18  -2    0.00    2.10
   9 -18   2   -0.20    2.10
  -9 -18  -2    2.50    2.40
   9 -18   2    4.10    2.20
   9 -19  -2   15.70    2.70
  -9 -19   2   16.80    3.00
   9 -19  -2   17.00    2.80
   9 -19   2   15.70    2.70
   9 -19   2   15.60    2.60
  -9 -19  -2   14.60    2.90
   9 -20  -2   -5.10    2.50
   9 -20  -2   -0.80    2.40
  -9 -20   2    4.60    2.90
   9 -20   2    2.20    2.60
  -9 -20  -2    2.90    2.70
   9 -20   2    0.90    2.50
 -10   0  -2   26.20    1.70
 -10   0   2   26.20    2.20
 -10   0  -2   23.70    2.20
  10   0  -2   26.10    2.20
  10   0   2   24.70    2.10
 -10  -1   2   45.30    2.70
 -10   1  -2   42.60    2.90
 -10  -1   2   43.00    2.90
  10   1   2   44.30    2.80
  10  -1  -2   45.00    2.90
 -10  -1  -2   43.90    2.50
 -10  -1  -2   41.80    2.90
  10  -1   2   47.70    2.90
  10   1  -2   47.90    2.80
 -10   1   2   49.40    3.00
 -10  -2   2   70.99    3.70
  10  -2  -2   70.39    3.80
  10   2   2   64.39    3.70
 -10  -2   2   64.89    3.80
 -10   2  -2   64.49    3.80
 -10  -2  -2   67.69    3.80
 -10  -2  -2   71.39    3.60
  10  -2   2   66.99    3.80
  10   2  -2   64.69    3.70
 -10   2   2   66.09    3.80
 -10  -3   2   32.20    2.50
  10  -3  -2   42.30    2.70
  10   3   2   38.00    2.40
 -10   3  -2   32.50    2.70
 -10  -3   2   38.20    2.40
  10   3  -2   33.80    2.40
  10  -3   2   35.50    2.60
 -10  -3  -2   32.60    2.50
 -10   3   2   36.60    2.70
 -10   4  -2   33.00    2.40
  10   4   2   21.60    2.00
 -10  -4   2   31.70    2.20
  10  -4  -2   33.30    2.40
 -10  -4   2   25.10    2.20
 -10  -4  -2   21.60    2.20
  10  -4   2   29.20    2.40
  10   4  -2   26.00    2.00
 -10   4   2   30.40    2.40
 -10   5  -2  203.08    9.80
  10  -5  -2  207.78    9.80
  10   5   2  185.08    9.50
 -10  -5   2  202.88    9.70
 -10  -5  -2  195.38    9.60
  10  -5   2  197.58    9.80
 -10   5   2  204.78    9.80
  10   5  -2  193.58    9.60
  10   6   2   61.59    3.30
  10  -6  -2   71.59    3.80
 -10   6  -2   65.39    3.80
 -10  -6   2   53.49    3.30
 -10  -6   2   66.99    3.50
 -10  -6  -2   55.49    3.30
 -10  -6  -2   61.69    3.50
  10  -6   2   56.09    3.70
  10   6  -2   64.79    3.30
 -10   6   2   66.89    3.80
 -10   7  -2   47.10    3.10
  10   7   2   45.20    2.50
 -10  -7   2   41.20    2.70
  10  -7  -2   51.29    3.10
 -10  -7   2   36.30    2.50
 -10  -7  -2   47.50    2.80
 -10   7   2   48.90    3.10
  10   7  -2   39.50    2.50
  10  -7   2   46.50    3.10
 -10   8  -2   14.50    1.90
  10  -8  -2   18.20    1.90
 -10  -8  -2   16.30    1.50
  10   8  -2   14.40    1.30
 -10  -8  -2   19.30    1.80
 -10   8   2   16.60    1.90
  10  -8   2   17.60    1.90
  10  -9  -2   34.20    3.00
 -10   9  -2   41.50    3.10
 -10   9   2   40.90    3.10
 -10  -9  -2   33.10    2.90
 -10  -9  -2   39.50    2.50
  10  -9   2   44.00    3.10
 -10  10  -2   32.30    2.90
  10 -10  -2   39.10    3.00
  10 -10   2   34.90    3.00
 -10 -10  -2   30.40    2.60
 -10  10   2   31.40    2.90
 -10  11  -2    7.80    1.80
 -10 -11   2    6.70    1.70
  10 -11  -2    8.70    1.80
 -10  11   2    7.20    1.70
 -10 -11  -2    8.60    1.80
  10 -11   2    9.50    1.80
  10 -12  -2   66.19    4.00
 -10 -12   2   56.99    4.00
 -10  12  -2   56.39    4.10
 -10  12   2   60.79    4.00
 -10 -12  -2   56.79    4.00
  10 -12   2   64.29    4.10
  10 -12   2   57.99    3.70
  10 -13  -2   65.29    4.20
  10 -13  -2   57.39    4.00
 -10 -13   2   58.49    4.20
 -10  13  -2   62.69    4.20
  10 -13   2   62.79    4.20
  10 -13   2   65.19    3.90
 -10 -13  -2   58.99    4.30
 -10 -14   2   24.50    2.80
  10 -14  -2   30.50    2.80
  10 -14  -2   33.60    2.70
  10 -14   2   31.10    2.80
  10 -14   2   29.10    2.50
 -10 -14  -2   25.20    2.80
  10 -15  -2   34.60    3.00
 -10 -15   2   33.90    3.10
  10 -15  -2   36.50    3.00
  10 -15   2   39.40    3.30
  10 -15   2   38.00    3.10
 -10 -15  -2   30.00    3.00
  10 -16  -2   13.10    2.30
 -10 -16   2   13.80    2.50
  10 -16  -2   14.30    2.40
 -10 -16  -2   14.60    2.50
  10 -16   2   12.60    2.40
  10 -16   2    9.80    2.10
  10 -17  -2   27.70    2.80
 -10 -17   2   24.50    3.00
  10 -17  -2   26.70    2.90
 -10 -17  -2   22.00    2.90
  10 -17   2   29.50    3.00
  10 -17   2   28.00    2.80
 -10 -18   2   -1.40    2.40
  10 -18  -2    3.00    2.40
  10 -18  -2    5.00    2.40
  10 -18   2   -1.30    2.10
  10 -18   2   -1.60    2.10
 -10 -18  -2    6.00    2.50
  10 -19  -2   22.50    3.10
 -10 -19   2   20.70    3.20
  10 -19  -2   21.10    2.80
 -10 -19  -2   20.00    3.20
  10 -19   2   22.70    3.00
  10 -19   2   20.10    2.90
  10 -20  -2    2.60    2.70
  10 -20  -2   -0.20    2.60
 -10 -20   2    2.20    2.80
  10 -20   2   -1.70    2.60
  10 -20   2    0.20    2.60
 -10 -20  -2    3.90    2.80
  11   0  -2  129.69    6.60
 -11   0   2  127.59    6.60
 -11   0  -2  125.69    6.40
  11   0   2  138.19    6.60
 -11   0  -2  125.99    6.60
 -11  -1   2   56.79    3.30
  11  -1  -2   59.79    3.40
 -11  -1   2   57.99    3.40
  11   1   2   57.69    3.30
 -11   1  -2   56.59    3.50
  11   1  -2   55.69    3.40
  11  -1   2   56.69    3.40
 -11   1   2   55.49    3.50
 -11  -1  -2   56.89    3.10
 -11  -1  -2   59.39    3.50
 -11  -2   2  155.28    7.70
  11  -2  -2  157.28    7.70
 -11   2  -2  155.08    7.70
 -11  -2   2  160.98    7.60
  11   2   2  150.08    7.60
  11  -2   2  149.29    7.70
  11   2  -2  151.58    7.60
 -11  -2  -2  152.38    7.60
 -11  -2  -2  143.99    7.60
 -11   2   2  155.38    7.70
 -11  -3   2   93.59    5.00
 -11  -3   2   92.19    5.00
  11   3   2   92.89    4.80
  11  -3  -2   94.59    5.10
 -11   3  -2   94.59    5.10
 -11   3   2   98.29    5.10
  11   3  -2   87.39    4.90
 -11  -3  -2   99.69    5.00
  11  -3   2   93.99    5.00
 -11  -4   2   84.99    4.80
 -11   4  -2   90.59    5.00
 -11  -4   2   90.79    4.80
  11  -4  -2   92.99    4.90
  11   4   2   86.89    4.70
 -11  -4  -2   87.59    4.80
  11  -4   2   91.29    4.90
 -11   4   2   93.79    5.00
  11   4  -2   88.19    4.70
  11  -5  -2  254.07   12.10
 -11   5  -2  248.48   12.10
  11   5   2  234.48   11.80
 -11  -5   2  250.77   11.90
 -11   5   2  241.48   12.00
  11  -5   2  242.48   12.00
  11   5  -2  243.88   11.80
 -11  -5  -2  254.37   11.90
  11  -6  -2   49.40    3.20
  11   6   2   38.60    2.60
 -11  -6   2   51.49    2.90
 -11   6  -2   45.90    3.20
 -11  -6  -2   32.90    2.50
  11  -6   2   45.90    3.20
  11   6  -2   48.10    2.70
 -11  -6  -2   43.80    2.90
 -11   6   2   45.50    3.20
  11   7   2   58.19    3.30
 -11  -7   2   66.89    3.60
 -11   7  -2   57.19    3.90
  11  -7  -2   59.09    3.80
 -11  -7  -2   70.59    3.50
  11  -7   2   59.99    3.90
  11   7  -2   57.49    3.30
 -11   7   2   60.39    3.80
 -11  -8   2    2.90    1.20
 -11   8  -2    1.90    1.60
  11  -8  -2    4.80    1.60
 -11   8   2    4.50    1.50
  11  -8   2    3.40    1.60
  11   8  -2    5.50    1.00
 -11  -8  -2   -0.80    1.20
  11  -9  -2   55.19    3.60
 -11  -9   2   49.20    3.20
 -11   9  -2   49.70    3.60
 -11  -9  -2   51.69    3.10
  11  -9   2   56.59    3.70
 -11   9   2   48.50    3.50
 -11  10  -2   14.00    2.00
 -11 -10   2   18.50    1.60
  11 -10  -2   15.80    2.10
  11 -10   2   16.30    2.10
 -11 -10  -2   14.40    1.50
 -11 -10  -2   12.60    1.90
 -11  10   2   14.90    2.10
 -11 -11   2   43.50    2.80
  11 -11  -2   38.20    3.40
 -11  11  -2   43.10    3.40
 -11 -11  -2   41.60    3.50
 -11  11   2   38.90    3.40
  11 -11   2   45.70    3.40
  11 -12  -2   28.00    2.70
 -11  12  -2   27.50    2.60
 -11  12   2   31.30    2.70
  11 -12   2   31.30    2.70
 -11 -12  -2   27.00    2.70
  11 -12   2   30.60    2.40
 -11  13  -2   19.00    2.40
  11 -13  -2   20.30    2.30
  11 -13  -2   18.00    2.40
 -11 -13  -2   16.90    2.40
  11 -13   2   21.40    2.10
  11 -13   2   19.20    2.40
 -11 -14   2   19.60    2.60
  11 -14  -2   30.80    2.70
  11 -14  -2   27.50    2.80
  11 -14   2   28.50    2.40
 -11 -14  -2   24.50    2.70
  11 -14   2   27.80    2.70
  11 -15  -2    8.60    2.10
  11 -15  -2   12.70    2.30
 -11 -15   2   11.00    2.30
  11 -15   2   10.40    2.20
  11 -15   2    7.10    1.90
 -11 -15  -2    5.20    2.20
  11 -16  -2   49.99    4.00
 -11 -16   2   36.90    3.60
  11 -16  -2   43.30    3.80
 -11 -16  -2   39.30    3.60
  11 -16   2   49.00    3.80
  11 -16   2   46.80    4.10
  11 -17  -2   -0.50    2.20
 -11 -17   2    1.90    2.40
  11 -17  -2    0.30    2.20
  11 -17   2    1.10    2.30
 -11 -17  -2    2.10    2.40
  11 -17   2   -0.40    2.00
 -11 -18   2   18.50    3.00
  11 -18  -2   19.70    2.90
  11 -18  -2   15.80    2.70
  11 -18   2   18.30    2.90
 -11 -18  -2   12.80    2.90
  11 -18   2   20.30    2.70
 -11 -19   2    1.20    2.70
  11 -19  -2    1.00    2.50
  11 -19  -2    2.30    2.40
  11 -19   2    3.40    2.60
  11 -19   2   -0.40    2.30
 -11 -19  -2    0.30    2.70
 -12   0  -2    1.30    0.80
  12   0   2   -0.50    1.20
  12   0  -2    0.50    1.30
 -12   0   2    1.10    1.40
 -12   0  -2    1.80    1.40
  12   1   2    2.20    1.20
 -12   1  -2    2.70    1.40
 -12  -1   2    0.60    1.30
 -12  -1   2    4.70    1.10
  12  -1  -2    2.20    1.30
 -12  -1  -2    0.80    1.30
  12   1  -2    1.30    1.30
 -12   1   2    1.30    1.40
 -12  -1  -2    3.00    0.90
  12  -1   2    3.00    1.30
 -12  -2   2    6.90    1.20
 -12   2  -2    3.40    1.50
  12  -2  -2    3.00    1.40
  12   2   2    4.80    1.20
 -12  -2   2    1.20    1.30
 -12  -2  -2    2.90    1.40
  12  -2   2    1.90    1.30
 -12  -2  -2    4.80    1.00
 -12   2   2    2.20    1.40
  12   2  -2    2.30    1.20
  12  -3  -2    4.50    1.50
 -12  -3   2    3.40    1.40
 -12  -3   2    5.70    1.20
  12   3   2    3.50    1.20
 -12   3  -2    6.00    1.50
 -12   3   2    4.90    1.50
 -12  -3  -2    3.20    1.40
  12   3  -2    5.90    1.30
  12  -3   2    4.30    1.40
 -12  -4   2   12.60    1.50
  12  -4  -2   13.50    1.80
 -12  -4   2   11.10    1.60
  12   4   2   11.10    1.40
 -12   4  -2   15.60    1.80
  12  -4   2   13.40    1.70
 -12   4   2   14.90    1.80
  12   4  -2   14.90    1.50
 -12  -4  -2   13.70    1.60
  12   5   2    3.50    1.10
  12  -5  -2    2.00    1.50
 -12   5  -2    4.90    1.60
 -12  -5   2    3.20    1.40
 -12  -5   2    4.80    1.30
 -12  -5  -2    3.40    1.30
 -12   5   2    3.10    1.60
  12  -5   2    2.90    1.50
  12   5  -2    2.60    1.10
 -12  -6   2   28.80    2.60
  12   6   2   31.60    2.20
 -12   6  -2   35.80    2.90
  12  -6  -2   31.90    2.90
 -12  -6  -2   32.30    2.50
 -12   6   2   31.80    2.80
  12  -6   2   31.40    2.90
  12   6  -2   27.50    2.20
 -12   7  -2    8.60    1.80
  12   7   2   11.80    1.20
 -12  -7   2    8.90    1.50
  12  -7  -2   10.70    1.80
 -12   7   2   13.00    1.80
  12   7  -2    9.40    1.20
  12  -7   2   10.10    1.80
 -12  -7  -2    9.50    1.50
 -12   8  -2    5.70    1.80
 -12  -8   2    5.70    1.40
  12  -8  -2    4.80    1.70
 -12  -8  -2    5.60    1.40
  12  -8   2    4.90    1.70
 -12   8   2    3.00    1.70
 -12  -9   2    4.40    1.40
  12  -9  -2    6.10    1.80
 -12   9  -2    4.60    1.80
 -12   9   2    4.10    1.80
  12  -9   2    4.00    1.80
 -12  -9  -2    3.20    1.30
  12 -10  -2    6.50    1.90
 -12 -10   2    4.60    1.40
 -12  10  -2    5.30    1.90
 -12 -10  -2    6.00    1.40
 -12  10   2    3.70    1.90
  12 -10   2    4.80    1.90
 -12 -11   2   22.20    2.00
 -12  11  -2   19.70    2.40
  12 -11  -2   24.90    2.50
  12 -11   2   25.00    2.50
 -12  11   2   22.90    2.50
 -12 -12   2   39.50    3.00
 -12  12  -2   39.40    3.30
  12 -12  -2   40.30    3.60
 -12  12   2   43.50    3.50
  12 -12   2   46.50    3.70
 -12 -12  -2   38.90    3.50
 -12 -13   2    2.70    1.40
  12 -13  -2    2.10    2.00
 -12  13  -2    1.80    2.00
 -12 -13  -2    3.10    2.10
  12 -13   2    3.50    2.10
  12 -13   2    1.20    1.60
  12 -14  -2   28.90    2.70
  12 -14  -2   33.10    3.00
  12 -14   2   30.40    2.60
  12 -14   2   24.30    2.80
 -12 -14  -2   21.60    2.80
  12 -15  -2    8.80    2.20
  12 -15  -2   11.80    2.40
 -12 -15  -2    7.60    2.30
  12 -15   2    6.30    1.90
  12 -15   2   10.20    2.30
  12 -16  -2   33.10    3.10
  12 -16  -2   28.60    3.00
  12 -16   2   34.60    2.90
  12 -16   2   30.40    3.10
 -12 -16  -2   23.70    3.10
  12 -17  -2    2.80    2.30
  12 -17  -2    2.00    2.20
  12 -17   2    6.50    2.40
 -12 -17  -2    4.80    2.50
  12 -17   2   -1.40    2.10
  12 -18  -2   13.90    2.80
  12 -18  -2   17.10    2.80
 -12 -18  -2   11.70    2.80
  12 -18   2   13.20    2.60
  12 -18   2   19.30    2.90
  12 -19  -2    0.80    2.60
  12 -19  -2    1.30    2.50
  12 -19   2    2.00    2.50
 -12 -19  -2    0.10    2.70
  12 -19   2    0.10    2.30
  13   0  -2   34.50    2.70
 -13   0  -2   33.40    2.20
 -13   0   2   40.20    2.90
 -13   0  -2   36.40    2.90
  13   0   2   34.90    2.70
  13  -1  -2  257.47   12.40
 -13  -1   2  252.87   12.40
  13   1   2  248.58   12.30
 -13   1  -2  250.37   12.40
 -13  -1   2  249.58   12.50
 -13   1  -2  266.47   12.40
 -13   1   2  247.08   12.40
 -13  -1  -2  248.98   12.40
  13  -1   2  251.97   12.30
 -13  -1  -2  244.08   12.30
  13   1  -2  261.57   12.30
 -13  -2   2   40.50    2.80
 -13   2  -2   47.30    3.20
  13   2   2   43.50    2.90
 -13  -2   2   39.00    3.00
  13  -2  -2   42.50    3.10
 -13  -2  -2   41.50    2.60
  13  -2   2   40.40    3.00
 -13   2   2   42.40    3.20
 -13  -2  -2   38.40    3.00
  13   2  -2   41.80    2.90
  13   3   2  252.57   12.20
 -13  -3   2  243.08   12.50
 -13   3  -2  258.17   12.40
  13  -3  -2  259.87   12.40
 -13  -3   2  250.47   12.30
  13   3  -2  244.58   12.20
 -13  -3  -2  257.07   12.30
 -13   3   2  256.47   12.40
  13  -3   2  249.28   12.40
 -13   4  -2  102.59    5.50
  13   4   2   97.29    5.10
 -13  -4   2   95.89    5.30
 -13  -4   2   96.69    5.30
  13  -4  -2   98.49    5.40
 -13  -4  -2   96.39    5.30
  13  -4   2  101.09    5.40
  13   4  -2   90.49    5.10
 -13   4   2  100.29    5.50
  13  -5  -2   77.59    4.70
 -13   5  -2   84.09    4.80
  13   5   2   70.29    4.20
 -13  -5   2   83.39    4.50
 -13  -5   2   76.29    4.50
  13  -5   2   89.89    4.70
 -13   5   2   76.59    4.70
 -13  -5  -2   80.09    4.50
  13   5  -2   76.99    4.30
  13  -6  -2  113.59    6.00
 -13   6  -2  118.29    6.10
  13   6   2   99.19    5.50
 -13  -6   2  109.89    5.80
  13  -6   2  115.49    6.00
  13   6  -2  105.59    5.50
 -13  -6  -2  103.59    5.70
 -13   6   2  102.19    6.00
 -13  -7   2   44.20    3.00
 -13   7  -2   40.50    3.40
  13  -7  -2   44.40    3.40
  13  -7   2   37.40    3.40
 -13  -7  -2   35.90    2.90
 -13   7   2   36.80    3.30
 -13  -8   2   28.70    2.70
  13  -8  -2   28.30    2.70
 -13   8  -2   29.20    2.70
 -13  -8  -2   36.40    2.70
  13  -8   2   36.00    3.20
 -13   8   2   33.10    2.80
 -13  -9   2    1.90    1.50
 -13   9  -2    2.20    1.90
  13  -9  -2    0.50    1.80
 -13  -9  -2    3.50    1.50
 -13   9   2    2.60    1.90
  13  -9   2    1.20    1.90
  13 -10  -2   31.20    3.00
 -13 -10   2   33.30    2.90
 -13  10  -2   37.30    3.10
 -13 -10  -2   34.60    2.80
  13 -10   2   40.60    3.50
 -13  10   2   37.10    3.00
  13 -11  -2    2.40    2.00
 -13 -11   2    0.40    1.50
 -13  11  -2    1.80    2.00
 -13  11   2    3.50    2.00
 -13 -11  -2    2.80    1.50
  13 -11   2    2.30    2.00
  13 -12  -2    6.70    2.20
 -13 -12   2    9.90    1.70
 -13  12  -2   10.80    2.30
  13 -12   2   12.10    2.30
 -13  12   2   12.90    2.30
 -13  13  -2    1.90    2.10
 -13 -13   2    4.10    1.50
  13 -13  -2    2.60    2.20
  13 -13   2    2.10    2.10
  13 -13   2    3.70    1.70
  13 -14  -2   14.10    2.30
  13 -14  -2    7.70    2.40
 -13 -14   2   11.30    1.70
  13 -14   2   14.10    2.10
  13 -14   2   14.50    2.50
  13 -15  -2   11.90    2.50
  13 -15  -2   12.10    2.40
  13 -15   2    9.60    2.10
 -13 -15  -2    7.40    2.40
  13 -15   2    9.70    2.40
  13 -16  -2    3.40    2.20
  13 -16  -2   -2.20    2.20
  13 -16   2    0.70    1.90
 -13 -16  -2    1.90    2.40
  13 -16   2   -1.70    2.20
  13 -17  -2    6.80    2.50
  13 -17  -2   11.30    2.70
 -13 -17  -2   10.40    2.70
  13 -17   2    6.70    2.20
  13 -17   2    8.80    2.60
  13 -18  -2    1.30    2.50
  13 -18  -2   -1.00    2.40
 -13 -18  -2    6.60    2.80
  13 -18   2   -2.30    2.40
  13 -18   2    0.70    2.30
 -14   0  -2   22.30    1.80
 -14   0   2   23.10    2.00
  14   0   2   20.50    2.00
  14   0  -2   19.90    2.00
 -14   0  -2   22.40    2.20
 -14   0   2   19.10    2.20
  14  -1  -2    6.30    1.60
 -14   1  -2    5.00    1.70
  14   1   2    7.20    1.50
 -14  -1   2    6.20    1.30
 -14  -1   2    5.80    1.60
 -14   1  -2    5.00    1.10
 -14   1   2    3.90    1.80
  14   1  -2    5.10    1.60
 -14  -1  -2    6.60    1.10
 -14  -1  -2    6.30    1.70
  14  -1   2    5.60    1.60
 -14   2  -2   32.90    3.00
 -14  -2   2   31.80    2.50
 -14  -2   2   31.40    2.50
  14   2   2   29.80    2.60
  14  -2  -2   31.70    2.90
 -14  -2  -2   29.80    2.30
 -14   2   2   30.50    2.60
 -14  -2  -2   29.00    2.50
  14   2  -2   30.80    2.40
  14  -2   2   31.40    2.80
 -14  -3   2   25.90    2.30
  14   3   2   26.40    2.40
  14  -3  -2   28.20    2.40
 -14   3  -2   25.20    2.50
 -14  -3   2   25.90    2.30
 -14  -3  -2   26.30    2.30
  14  -3   2   25.90    2.30
 -14   3   2   24.70    2.50
  14   3  -2   26.00    2.40
  14   4   2   45.70    2.90
 -14   4  -2   45.70    3.50
 -14  -4   2   45.40    3.30
  14  -4  -2   46.40    3.40
 -14  -4   2   41.70    3.10
 -14   4   2   42.90    3.50
 -14  -4  -2   44.90    3.30
  14   4  -2   41.50    3.00
  14  -4   2   49.10    3.40
  14  -5  -2    4.70    1.80
 -14  -5   2    3.10    1.60
 -14   5  -2    3.60    1.90
  14   5   2    2.90    1.20
 -14  -5  -2    4.10    1.60
  14  -5   2    5.30    1.80
 -14   5   2    3.60    1.80
  14   5  -2    7.50    1.40
 -14   6  -2   11.30    2.10
 -14  -6   2   11.70    1.90
  14  -6  -2    8.50    2.00
 -14   6   2   11.10    2.10
 -14  -6  -2   12.80    1.80
  14  -6   2   13.20    2.00
 -14   7  -2    9.10    2.10
  14  -7  -2    6.00    1.90
 -14  -7   2    5.30    1.70
 -14  -7  -2    9.30    1.70
 -14   7   2    7.50    2.10
  14  -7   2    8.80    2.00
 -14  -8   2    3.60    1.70
 -14   8  -2   -2.40    2.00
  14  -8  -2   -1.60    1.80
 -14  -8  -2    4.40    1.70
 -14   8   2    1.40    1.90
  14  -8   2    2.30    2.00
 -14   9  -2    4.60    2.10
  14  -9  -2    4.60    2.10
 -14  -9   2    7.70    1.80
  14  -9   2    6.20    2.10
 -14  -9  -2    4.70    1.70
 -14   9   2    3.50    2.10
  14 -10  -2    3.30    2.10
 -14  10  -2    0.40    2.10
 -14 -10   2    3.40    1.70
  14 -10   2    1.90    2.10
 -14 -10  -2    3.20    1.60
 -14  10   2    3.50    2.10
 -14  11  -2   54.99    4.20
  14 -11  -2   53.59    4.20
 -14 -11   2   59.79    3.70
 -14  11   2   49.70    4.20
 -14 -11  -2   49.20    3.50
  14 -11   2   51.49    4.20
  14 -12  -2   -1.40    2.10
 -14  12  -2    2.20    2.10
 -14 -12   2    2.00    1.60
  14 -12   2    3.10    2.20
 -14 -12  -2    1.50    1.50
 -14  12   2    1.40    2.10
 -14 -13   2   24.80    2.30
  14 -13  -2   21.50    2.90
  14 -13   2   26.20    2.90
  14 -14  -2    0.90    2.30
 -14 -14   2   -0.50    1.60
  14 -14   2    2.20    1.80
  14 -14   2    5.20    2.30
  14 -15  -2   48.40    4.00
  14 -15  -2   45.50    4.00
  14 -15   2   49.90    3.90
  14 -15   2   46.20    3.90
  14 -16  -2    4.80    2.40
  14 -16  -2    6.90    2.30
  14 -16   2    3.90    2.10
  14 -16   2    1.00    2.40
  14 -17  -2   23.60    3.10
  14 -17  -2   18.50    2.90
  14 -17   2   29.30    2.90
  14 -17   2   23.50    3.20
  14 -18  -2   -0.20    2.40
  14 -18  -2    3.10    2.70
  14 -18   2    6.90    2.80
 -15   0   2  151.58    7.70
 -15   0   2  139.59    7.50
 -15   0  -2  155.58    7.70
  15   0  -2  144.19    7.50
  15   0   2  145.99    7.50
 -15   0  -2  136.39    7.30
  15   1   2    1.40    1.50
 -15   1  -2    2.50    1.10
 -15  -1   2    1.00    1.70
 -15  -1   2    1.00    1.40
 -15   1  -2    0.00    1.80
  15  -1  -2    2.40    1.70
 -15  -1  -2    2.60    1.10
 -15   1   2    2.40    1.80
  15   1  -2    1.10    1.60
  15  -1   2    2.50    1.60
 -15  -1  -2    1.40    1.70
  15   2   2  153.38    7.80
 -15  -2   2  150.38    7.90
 -15   2  -2  153.18    8.00
 -15  -2   2  157.28    7.90
  15  -2  -2  151.38    7.90
  15  -2   2  152.18    7.90
  15   2  -2  151.78    7.80
 -15  -2  -2  152.88    7.90
 -15  -2  -2  147.19    7.70
 -15   2   2  153.48    8.10
 -15  -3   2   23.10    2.40
 -15  -3   2   25.80    2.30
  15   3   2   24.80    2.20
  15  -3  -2   28.30    2.50
 -15   3  -2   22.20    2.50
  15   3  -2   24.30    2.20
  15  -3   2   24.30    2.40
 -15   3   2   26.90    2.60
 -15  -3  -2   28.50    2.50
 -15  -4   2   66.09    4.30
  15   4   2   74.69    4.20
 -15   4  -2   81.19    4.80
  15  -4  -2   75.79    4.60
 -15  -4   2   72.69    4.60
  15  -4   2   71.49    4.60
 -15  -4  -2   80.99    4.50
  15   4  -2   70.89    4.30
 -15   4   2   67.39    4.80
 -15  -5   2   26.40    2.50
 -15   5  -2   31.30    2.80
  15  -5  -2   26.00    2.70
 -15  -5  -2   29.20    2.60
 -15   5   2   26.90    2.80
  15  -5   2   33.00    2.70
 -15  -6   2   44.30    3.40
 -15   6  -2   41.10    3.70
  15  -6  -2   43.00    3.60
 -15  -6  -2   40.00    3.40
 -15   6   2   40.20    3.80
  15  -6   2   42.90    3.70
 -15  -7   2   35.60    3.30
 -15   7  -2   41.40    3.80
  15  -7  -2   47.10    3.60
 -15   7   2   35.40    3.20
  15  -7   2   33.20    3.10
 -15  -7  -2   35.70    3.30
 -15  -8   2   14.10    2.10
 -15   8  -2   15.60    2.50
  15  -8  -2   17.50    2.40
 -15   8   2   11.00    2.40
  15  -8   2   11.10    2.30
 -15  -8  -2   15.10    2.00
  15  -9  -2   15.80    2.50
 -15  -9   2   12.90    2.10
 -15   9  -2   17.30    2.50
  15  -9   2   16.40    2.50
 -15   9   2   18.20    2.60
 -15  -9  -2   16.20    2.10
 -15 -10   2    2.30    1.80
 -15  10  -2   -1.30    2.10
  15 -10  -2    2.90    2.20
  15 -10   2    1.70    2.10
 -15 -10  -2   -0.10    1.70
 -15  10   2    1.70    2.10
 -15  11  -2    2.80    2.20
  15 -11  -2    0.80    2.30
 -15 -11   2    6.90    1.90
  15 -11   2   11.90    2.40
 -15 -11  -2    7.60    1.80
 -15  11   2    4.90    2.30
 -15 -12   2    2.90    1.70
  15 -12  -2   -1.60    2.30
 -15  12  -2    0.40    2.20
 -15  12   2   -0.80    2.20
 -15 -12  -2    3.00    1.70
  15 -12   2   -0.90    2.20
  15 -13  -2    5.00    2.50
 -15 -13   2    5.10    1.80
  15 -13   2    6.40    2.50
 -15 -14   2    8.70    1.80
  15 -14  -2    7.60    2.70
  15 -14   2    9.10    2.60
  15 -14   2    5.60    2.00
  15 -15  -2    5.90    2.60
  15 -15  -2    3.90    2.20
  15 -15   2    2.20    2.50
  15 -15   2    3.50    2.00
  15 -16  -2    3.00    2.60
  15 -16  -2    1.20    2.30
  15 -16   2    1.40    2.60
  15 -16   2    3.80    2.10
  15 -17  -2   -2.50    2.50
  15 -17  -2   -0.50    2.30
  15 -17   2    1.60    2.70
  16   0  -2    5.50    1.80
 -16   0  -2    6.20    2.10
 -16   0   2    5.10    2.10
  16   0   2    7.70    1.80
 -16   0  -2    7.40    1.30
 -16   0   2    4.60    1.50
  16  -1  -2   22.40    2.30
 -16   1  -2   23.20    2.50
 -16  -1   2   23.80    2.50
 -16  -1   2   23.20    2.10
 -16   1  -2   20.30    2.00
  16   1   2   20.40    2.20
 -16   1   2   21.00    2.50
  16   1  -2   20.40    2.20
 -16  -1  -2   20.40    1.90
 -16  -1  -2   19.30    2.30
  16  -1   2   22.10    2.30
 -16  -2   2    5.50    1.50
  16   2   2    7.30    1.70
 -16   2  -2    5.00    2.00
 -16  -2   2    6.00    1.90
 -16   2  -2    4.70    1.30
  16  -2  -2    3.60    1.90
  16  -2   2    4.90    1.80
 -16  -2  -2    5.40    1.90
  16   2  -2    2.90    1.60
 -16  -2  -2    3.00    1.30
 -16   2   2    2.40    2.10
 -16  -3   2   22.40    2.20
 -16  -3   2   22.50    2.50
 -16   3  -2   21.90    2.60
  16  -3  -2   22.70    2.50
  16   3   2   20.90    2.10
 -16  -3  -2   25.40    2.50
  16  -3   2   25.10    2.50
 -16   3   2   26.90    2.70
  16   3  -2   17.50    2.10
 -16  -4   2   -1.20    1.90
 -16  -4   2    2.30    1.60
 -16   4  -2   -0.60    2.00
  16  -4  -2    3.30    2.00
  16  -4   2    3.00    1.90
 -16  -4  -2    2.20    1.90
 -16   4   2    1.40    2.10
 -16   5  -2   47.40    4.10
  16  -5  -2   40.90    3.80
 -16  -5   2   39.50    3.70
 -16  -5  -2   47.10    3.70
  16  -5   2   48.10    3.80
 -16   5   2   48.70    3.90
  16  -6  -2    9.80    2.20
 -16  -6   2    7.50    2.00
 -16   6  -2    7.70    2.30
  16  -6   2    8.70    2.20
 -16   6   2    9.20    2.30
 -16  -6  -2    4.90    1.90
  16  -7  -2    1.20    2.10
 -16   7  -2    4.80    2.20
 -16  -7   2    4.40    2.00
  16  -7   2    1.20    2.10
 -16  -7  -2    2.50    1.90
 -16   7   2    3.20    2.20
 -16   8  -2    7.60    2.40
  16  -8  -2    4.90    2.20
 -16  -8   2    6.60    2.00
 -16  -8  -2    3.00    1.90
 -16   8   2    3.50    2.30
  16  -8   2    8.20    2.20
 -16  -9   2    2.00    1.90
 -16   9  -2    2.40    2.30
  16  -9  -2    2.30    2.20
 -16  -9  -2    1.20    1.80
  16  -9   2    3.10    2.20
 -16   9   2   -0.10    2.20
 -16  10  -2   35.50    3.30
 -16 -10   2   39.50    3.40
  16 -10  -2   37.90    3.40
 -16  10   2   37.70    3.50
 -16 -10  -2   32.80    2.90
  16 -10   2   33.90    3.30
 -16 -11   2    0.40    1.90
 -16  11  -2    3.00    2.30
  16 -11  -2    1.00    2.30
 -16  11   2    1.60    2.40
 -16 -11  -2    2.60    1.90
  16 -11   2    0.40    2.20
  16 -12  -2   29.00    3.40
 -16  12  -2   31.70    3.30
 -16 -12   2   28.50    2.70
 -16  12   2   31.60    3.30
  16 -12   2   29.70    3.30
  16 -13  -2   -0.50    2.50
 -16 -13   2   -0.80    1.90
  16 -13   2   -0.40    2.40
  16 -14  -2   35.00    3.60
  16 -14   2   25.60    2.80
  16 -14   2   26.50    3.40
  16 -15  -2   -3.20    2.50
  16 -15   2   -2.60    2.50
  16 -15   2    1.40    2.10
  16 -16  -2   24.60    3.00
  16 -16  -2   18.70    3.10
  16 -16   2   20.90    3.20
  17   0   2   -2.10    1.80
 -17   0   2   -1.30    2.10
 -17   0  -2    0.20    2.10
 -17   0   2   -0.60    1.50
  17   0  -2    2.00    1.80
 -17  -1   2  227.18   10.40
  17   1   2  183.48   10.10
  17  -1  -2  186.28   10.20
 -17   1  -2  224.58   10.40
 -17  -1   2  194.08   10.20
  17   1  -2  200.08   10.10
  17  -1   2  209.58   10.20
 -17   1   2  189.28   10.20
 -17   1   2  197.58   10.40
 -17  -1  -2  195.98   10.20
  17  -2  -2    6.00    2.00
 -17  -2   2    4.70    1.80
 -17  -2   2    8.20    2.20
  17   2   2    4.70    1.80
 -17   2  -2    7.00    2.30
  17   2  -2    4.90    1.80
 -17  -2  -2    2.30    2.10
  17  -2   2    5.50    2.00
 -17   2   2    8.70    2.30
  17  -3  -2  131.69    7.10
 -17   3  -2  134.39    7.20
 -17  -3   2  123.79    6.90
 -17  -3   2  120.39    7.00
  17  -3   2  125.39    7.10
 -17   3   2  130.09    7.20
 -17  -3  -2  130.99    7.10
 -17   4  -2    1.40    2.30
 -17  -4   2    0.50    1.70
 -17  -4   2    1.50    2.10
  17  -4  -2    2.70    2.10
 -17   4   2    2.00    2.20
  17  -4   2    3.70    2.10
 -17  -4  -2    0.90    2.10
 -17  -5   2   67.79    4.70
 -17   5  -2   66.09    4.90
  17  -5  -2   68.09    4.70
  17  -5   2   68.79    4.70
 -17  -5  -2   63.09    4.50
 -17   5   2   67.39    4.90
 -17   6  -2    1.80    2.40
 -17  -6   2    3.30    2.10
  17  -6  -2    4.60    2.10
 -17   6   2    5.90    2.30
  17  -6   2    6.80    2.30
 -17  -6  -2    6.50    2.10
 -17  -7   2   32.80    3.10
  17  -7  -2   34.80    3.30
 -17   7  -2   32.20    3.40
 -17   7   2   38.60    3.50
  17  -7   2   35.20    3.30
 -17  -7  -2   37.50    3.10
 -17   8  -2    3.40    2.30
  17  -8  -2    6.10    2.40
 -17  -8   2    2.20    2.10
 -17   8   2    4.00    2.40
  17  -8   2    6.90    2.30
 -17  -8  -2    4.90    2.10
 -17   9  -2    6.20    2.50
  17  -9  -2    0.60    2.40
 -17  -9   2    3.30    2.20
  17  -9   2    8.10    2.40
 -17  -9  -2    3.40    2.10
 -17   9   2    3.60    2.50
 -17  10  -2    9.00    2.50
 -17 -10   2    9.50    2.30
  17 -10  -2    8.80    2.50
  17 -10   2    7.50    2.50
 -17 -10  -2    4.80    2.10
 -17  10   2    7.40    2.50
 -17  11  -2   -0.20    2.40
 -17 -11   2    3.00    2.10
  17 -11  -2   -3.90    2.50
 -17  11   2   -0.90    2.40
  17 -11   2    3.30    2.40
 -17 -11  -2    2.50    2.00
 -17  12  -2    7.30    2.60
 -17 -12   2    1.00    2.10
  17 -12  -2    3.10    2.50
 -17  12   2    5.00    2.50
  17 -12   2    5.20    2.60
 -17 -12  -2    3.40    2.00
  17 -13  -2    3.40    2.70
 -17 -13   2    5.70    2.10
  17 -13   2   10.00    2.80
 -17 -14   2    1.40    2.10
  17 -14  -2    3.90    2.80
  17 -14   2    3.60    2.60
  17 -15  -2    0.20    2.80
  17 -15   2    4.10    2.80
  17 -16  -2    1.60    2.50
  17 -16  -2    0.70    2.80
  17 -16   2    3.80    2.90
  18   0  -2   24.60    2.70
 -18   0   2   30.40    3.10
 -18   0  -2   28.40    3.00
  18   0   2   31.30    2.80
 -18   0   2   29.70    2.60
 -18  -1   2    9.20    2.50
  18  -1  -2    9.80    2.20
 -18   1  -2   14.00    2.60
 -18  -1   2   10.60    1.90
  18   1   2   10.60    2.00
 -18   1   2    4.50    2.40
  18   1  -2    8.50    2.10
 -18  -1  -2   10.10    2.30
 -18   1   2    9.40    1.80
  18  -1   2    8.60    2.10
 -18  -2   2   44.00    3.60
 -18   2  -2   45.30    3.70
 -18  -2   2   45.00    3.40
  18  -2  -2   43.30    3.70
  18  -2   2   38.00    3.30
 -18  -2  -2   41.70    4.00
 -18   2   2   46.40    3.80
 -18  -3   2    2.20    2.20
  18  -3  -2    1.60    2.10
 -18  -3   2    0.10    1.60
 -18   3  -2    0.70    2.30
 -18  -3  -2    2.00    2.20
  18  -3   2    1.00    2.10
 -18   3   2   -1.10    2.30
 -18  -4   2   21.10    2.40
 -18   4  -2   20.00    2.90
 -18  -4   2   19.20    2.70
  18  -4  -2   23.50    2.90
 -18  -4  -2   25.10    2.70
  18  -4   2   21.70    2.70
 -18   4   2   19.30    2.90
 -18  -5   2    7.50    2.40
 -18   5  -2    3.70    2.60
  18  -5  -2    6.70    2.40
 -18  -5  -2    9.50    2.30
  18  -5   2    5.60    2.20
 -18   5   2    8.50    2.50
  18  -6  -2   16.20    2.80
 -18  -6   2   26.00    2.80
 -18   6  -2   24.50    3.10
  18  -6   2   21.30    2.80
 -18   6   2   25.50    3.10
 -18  -6  -2   23.40    2.70
 -18   7  -2    0.80    2.50
 -18  -7   2    3.30    2.30
  18  -7  -2   -3.60    2.30
 -18  -7  -2    4.40    2.20
  18  -7   2    1.90    2.30
 -18   7   2    3.30    2.40
 -18   8  -2    6.30    2.60
 -18  -8   2    2.00    2.20
  18  -8  -2    3.70    2.50
  18  -8   2    5.00    2.60
 -18  -8  -2    2.10    2.10
 -18   8   2    5.30    2.70
  18  -9  -2   10.10    2.80
 -18  -9   2    8.60    2.40
 -18   9  -2   10.00    2.70
 -18   9   2   10.60    2.70
  18  -9   2   11.80    2.60
 -18  -9  -2   11.30    2.30
 -18  10  -2    7.60    2.60
 -18 -10   2    4.00    2.30
  18 -10  -2    6.40    2.70
  18 -10   2    5.90    2.50
 -18 -10  -2    7.80    2.20
 -18  10   2    6.20    2.60
  18 -11  -2   17.90    3.10
 -18 -11   2   17.60    2.70
 -18  11  -2   15.80    3.00
  18 -11   2   20.20    3.00
 -18  11   2   13.80    3.00
 -18 -12   2   10.40    2.30
  18 -12  -2    2.20    2.70
 -18  12  -2    1.40    2.70
  18 -12   2    7.70    2.70
 -18  12   2    5.60    2.60
 -18 -13   2   19.50    2.70
  18 -13  -2   21.00    3.20
  18 -13   2   19.70    3.30
  18 -14  -2    5.80    2.90
 -18 -14   2   -1.60    2.10
  18 -15  -2   10.60    3.20
  18 -15   2   16.50    3.20
 -19   0   2  122.79    7.40
  19   0  -2  132.69    7.10
  19   0   2  120.29    7.00
 -19   0  -2  132.49    7.40
  19  -1  -2    2.30    2.10
 -19   1  -2    1.60    2.40
 -19  -1   2   -1.10    2.50
  19  -1   2    0.60    2.10
 -19  -1  -2   -0.90    2.30
 -19   1   2   -4.40    2.40
 -19   2  -2   87.99    5.90
  19  -2  -2   87.79    5.60
 -19  -2   2   86.89    5.80
  19  -2   2   84.89    5.60
 -19  -2  -2   89.49    5.80
 -19   2   2   88.19    5.90
  19  -3  -2    6.20    2.30
 -19   3  -2    5.60    2.60
 -19  -3   2    5.60    2.50
  19  -3   2    3.60    2.30
 -19   3   2    8.30    2.60
 -19  -3  -2    7.00    2.50
 -19  -4   2   47.30    3.80
 -19   4  -2   42.80    3.90
  19  -4  -2   46.00    4.10
 -19   4   2   43.80    3.90
 -19  -4  -2   46.80    3.90
  19  -4   2   43.40    4.10
 -19   5  -2   -2.30    2.50
  19  -5  -2    5.00    2.40
 -19  -5   2    1.50    2.30
 -19  -5  -2    2.90    2.30
  19  -5   2    1.20    2.30
 -19   5   2    2.90    2.60
  19  -6  -2   22.20    3.00
 -19   6  -2   23.70    3.40
 -19  -6   2   29.30    3.10
 -19  -6  -2   27.00    3.10
 -19   6   2   27.30    3.30
  19  -6   2   26.00    3.20
 -19   7  -2    3.00    2.60
  19  -7  -2    1.00    2.50
 -19  -7   2   -1.00    2.40
 -19   7   2   -1.10    2.60
 -19  -7  -2   -0.50    2.30
 -19   8  -2    6.60    2.70
 -19  -8   2    8.80    2.50
  19  -8  -2    2.70    2.70
 -19  -8  -2    9.70    2.50
 -19   8   2    3.50    2.80
  19  -8   2    7.50    2.50
 -19   9  -2    2.00    2.70
  19  -9  -2    0.30    2.60
 -19  -9  -2    0.80    2.30
 -19   9   2    2.60    2.70
 -19 -10   2    6.70    2.40
 -19  10  -2    4.90    2.80
  19 -10  -2   -0.70    2.80
 -19 -10  -2    5.10    2.30
  19 -10   2   -0.20    2.60
 -19  10   2    1.40    2.80
 -19 -11   2    3.10    2.40
 -19  11  -2    3.90    2.70
  19 -11  -2    0.20    2.80
 -19  11   2    4.00    2.80
  19 -11   2   -0.80    2.60
  19 -12  -2   -6.60    2.70
  19 -12   2   -0.80    2.70
  19 -13  -2    1.50    3.00
  19 -13   2    1.90    2.80
  19 -14  -2   -0.60    2.80
 -20   0   2   15.60    3.10
 -20   0  -2   14.30    2.90
 -20  -1   2   49.40    4.10
 -20   1  -2   49.50    4.10
  20  -1  -2   46.10    3.80
 -20   1   2   50.49    4.10
 -20  -1  -2   47.50    4.00
 -20  -2   2    3.90    2.60
  20  -2  -2    4.90    2.40
 -20   2  -2    6.70    2.80
 -20  -2  -2    7.50    2.60
 -20   2   2    9.50    2.80
  20  -2   2    6.40    2.40
 -20   3  -2   39.30    3.80
 -20  -3   2   42.30    3.80
  20  -3  -2   36.00    3.70
 -20   3   2   40.90    4.00
 -20  -3  -2   39.40    3.70
  20  -3   2   36.20    3.60
 -20  -4   2    4.50    2.70
  20  -4  -2    4.70    2.60
 -20   4  -2    1.40    2.80
 -20   4   2   -0.30    2.80
 -20  -4  -2    4.00    2.50
  20  -4   2    4.60    2.40
 -20   5  -2   12.20    3.10
  20  -5  -2   11.40    2.90
 -20  -5   2   15.20    3.10
 -20   5   2   13.40    3.00
 -20  -5  -2   16.70    2.80
 -20  -6   2    1.00    2.70
 -20   6  -2    9.40    3.10
  20  -6   2    4.30    2.50
 -20   6   2    4.10    2.80
 -20  -6  -2    4.20    2.40
 -20   7  -2   15.00    3.20
  20  -7  -2   11.60    2.80
 -20  -7   2   15.60    2.90
 -20   7   2   20.70    3.20
  20  -7   2   13.00    2.80
 -20  -7  -2   13.20    2.60
 -20  -8   2   -1.20    2.50
 -20   8  -2    1.10    2.80
  20  -8  -2    0.80    2.80
 -20   8   2    2.40    2.90
 -20  -8  -2    0.00    2.40
 -20  -9   2    6.60    2.70
  20  -9  -2    4.50    2.90
 -20   9  -2    6.60    3.00
  20  -9   2   10.30    2.90
 -20  -9  -2    1.80    2.50
 -20   9   2    9.90    3.10
 -20 -10   2    6.40    2.60
 -20  10  -2    9.40    3.00
  20 -10  -2    1.70    2.80
 -20  10   2    1.40    2.90
 -20 -11   2    8.60    2.60
  20 -11  -2    6.20    3.10
  20 -11   2    7.00    2.90
 -20  12  -2    8.90    3.10
 -20 -12   2    4.60    2.60
  20 -12   2    3.50    3.00
 -21   0  -2   -2.50    2.80
 -21   0   2   -0.30    2.80
 -21   1  -2   97.59    6.30
 -21  -1   2   84.49    6.50
 -21  -1  -2   94.39    6.10
 -21   1   2   84.69    6.40
 -21  -2   2    7.30    2.80
  21  -2  -2    4.50    2.50
 -21   2  -2    2.40    2.80
 -21  -2  -2    8.50    2.80
 -21   2   2    9.60    3.10
 -21  -3   2   58.19    5.10
  21  -3  -2   57.89    4.80
 -21   3  -2   52.69    4.60
 -21   3   2   60.99    5.20
 -21  -3  -2   54.79    5.00
 -21  -4   2    3.60    2.80
  21  -4  -2    8.30    2.70
 -21   4  -2    6.50    3.00
 -21  -4  -2    5.90    2.80
 -21   4   2    9.70    3.00
 -21  -5   2   31.10    3.60
  21  -5  -2   26.80    3.40
 -21   5  -2   30.20    3.80
 -21   5   2   32.50    3.70
 -21  -5  -2   29.10    3.40
  21  -5   2   26.50    3.30
  21  -6  -2   -0.40    2.60
 -21  -6   2    6.00    2.90
 -21   6  -2    3.80    2.90
 -21   6   2    3.80    3.00
  21  -6   2    2.80    2.60
 -21  -6  -2    6.30    2.70
  21  -7  -2   12.60    3.10
 -21   7  -2    9.50    3.20
 -21  -7   2   15.60    3.10
 -21   7   2   14.60    3.40
  21  -7   2   13.20    2.90
 -21  -7  -2   13.50    2.80
 -21  -8   2    4.50    2.80
 -21   8  -2    4.30    3.10
 -21  -8  -2    3.40    2.70
  21  -8   2    3.20    2.70
 -21   8   2    3.20    3.10
 -21   9  -2    7.20    3.00
  21  -9  -2    4.50    3.00
 -21  -9  -2    5.90    2.60
 -21   9   2    4.00    3.10
 -21 -10   2    5.60    2.80
 -21  10  -2    6.00    3.10
  21 -10  -2    1.40    2.90
 -21 -10  -2    3.00    2.60
 -21  10   2    3.20    3.10
  21 -10   2    8.80    3.10
 -21  11  -2   -1.40    3.00
  21 -11  -2    0.00    2.90
 -22   0   2   42.20    4.30
 -22   0  -2   38.90    4.20
 -22   1  -2   21.50    3.40
 -22  -1   2   15.00    3.30
 -22   1   2   18.00    3.40
 -22  -1  -2   18.30    3.30
 -22   2  -2   37.90    4.30
 -22  -2   2   38.20    4.10
 -22   2   2   38.90    4.10
 -22  -2  -2   40.10    4.00
 -22  -3   2   12.00    3.10
  22  -3  -2   11.50    2.90
 -22   3  -2   11.40    3.40
 -22  -3  -2   16.10    3.20
 -22   3   2   11.20    3.30
 -22  -4   2   14.40    3.20
 -22  -4  -2   14.30    3.10
 -22   4   2   13.60    3.40
 -22   5  -2    2.50    3.10
 -22  -5   2    4.70    3.00
  22  -5  -2    1.00    2.80
 -22   5   2   10.80    3.30
  22  -5   2    9.50    2.80
 -22  -6   2   13.30    3.20
  22  -6  -2    9.20    3.00
 -22   6  -2   11.20    3.40
 -22   6   2   10.10    3.40
  22  -6   2   12.90    3.00
 -22  -7   2   -2.00    3.00
 -22   7  -2    4.10    3.20
 -22  -7  -2    6.10    3.00
 -22   7   2   -1.40    3.10
  22  -8  -2    9.60    3.20
 -22   8  -2    9.80    3.40
  22  -8   2    8.70    3.10
 -22  -8  -2    8.40    2.90
 -22   8   2   10.00    3.40
 -22  -9   2   -0.20    2.90
 -22   9  -2    3.30    3.10
  22  -9  -2   -2.20    2.90
 -22   9   2    0.90    3.20
  22  -9   2   -1.50    2.80
 -23   0   2   25.00    3.90
 -23   0  -2   26.40    3.90
 -23   1  -2    7.20    3.30
 -23  -1   2    8.60    3.30
 -23   1   2   11.30    3.50
 -23  -1  -2    8.70    3.40
 -23  -2   2   30.60    4.00
 -23   2   2   31.00    4.10
 -23  -2  -2   28.40    3.90
 -23  -3   2   21.80    3.60
 -23   3   2   14.90    3.60
 -23  -3  -2   16.20    3.40
 -23   4  -2   18.50    3.70
 -23  -4   2   19.70    3.60
 -23  -4  -2   16.80    3.50
 -23  -5  -2    7.50    3.10
 -23   5   2    9.80    3.60
 -23  -6   2    8.10    3.20
 -23   6   2    8.10    3.50
 -23  -6  -2    7.70    3.10
 -23   7  -2   11.00    3.50
  23  -7  -2   14.40    3.30
 -23  -7   2   12.90    3.40
 -23   7   2   10.50    3.50
 -24   0   2   11.10    3.70
 -24   1  -2   37.50    4.50
 -24  -1   2   34.70    4.40
 -24  -1  -2   39.80    4.60
 -24   1   2   37.90    4.50
 -24  -2   2   21.40    3.90
 -24  -2  -2   24.30    3.90
 -24   3  -2   20.10    4.00
 -24  -3   2   27.00    4.00
 -24   4  -2    8.00    3.40
 -24  -4   2    9.20    3.50
 -24  -4  -2    7.30    3.40
 -24   4   2    5.50    3.60
   0   0   3    5.50    0.40
   0   1  -3   -0.60    0.20
   0  -1  -3   -0.50    0.20
   0   1   3   -0.20    0.20
   0   1  -3   -0.10    0.30
   0   1   3   -0.40    0.20
   0   1  -3   -0.30    0.20
   0  -1   3   -0.30    0.30
   0  -1   3    0.00    0.20
   0  -1   3   -0.40    0.20
   0  -1  -3   -0.30    0.20
   0  -2   3    3.50    0.40
   0  -2   3    3.30    0.40
   0   2  -3    4.50    0.40
   0  -2   3    3.80    0.40
   0   2  -3    3.90    0.40
   0   2   3    3.70    0.30
   0  -2  -3    3.60    0.30
   0   2  -3    2.90    0.40
   0  -2   3    3.20    0.30
   0   2   3    3.30    0.30
   0   3   3   -0.10    0.30
   0  -3  -3   -1.20    0.50
   0  -3   3    0.40    0.50
   0  -3   3   -0.30    0.40
   0   3   3   -0.40    0.30
   0  -3  -3   -0.10    0.10
   0   3  -3   -0.30    0.50
   0  -3  -3    0.30    0.40
   0  -3   3   -0.30    0.50
   0  -4   3  610.94   28.40
   0  -4   3  633.34   29.10
   0   4   3  589.84   29.10
   0  -4  -3  640.64   28.40
   0  -4   3  609.04   29.10
   0  -4  -3  593.64   29.10
   0   4  -3  656.13   29.10
   0  -5   3   -2.20    0.60
   0  -5   3    0.20    0.60
   0  -5  -3   -0.30    0.10
   0   5  -3    0.10    0.60
   0  -5   3   -0.20    0.60
   0  -5  -3    1.00    0.50
   0  -5  -3   -0.10    0.70
   0  -6  -3  200.08    9.40
   0   6  -3  201.88    9.50
   0  -6   3  185.98    9.50
   0  -6  -3  204.78    9.30
   0  -6   3  199.08    9.50
   0  -6   3  198.68    9.30
   0   7  -3    0.30    0.60
   0  -7   3   -0.10    0.60
   0  -7   3    0.30    0.80
   0  -7  -3    0.20    0.60
   0  -7  -3    0.60    0.30
   0  -7   3   -1.40    0.70
   0  -7  -3   -0.10    0.80
   0  -8   3  516.65   23.80
   0  -8  -3  527.85   23.70
   0   8  -3  489.55   23.80
   0  -8  -3  513.75   23.30
   0  -8   3  511.25   23.30
   0  -8   3  465.25   23.80
   0  -9  -3    0.40    0.70
   0   9  -3   -1.90    0.80
   0  -9   3   -3.10    0.80
   0  -9   3   -1.60    0.80
   0  -9  -3   -0.70    1.10
   0  -9  -3   -0.20    0.40
   0  -9   3    1.40    1.00
   0 -10  -3  769.12   33.00
   0 -10  -3  722.73   32.40
   0 -10   3  699.33   33.00
   0 -10   3  628.74   33.00
   0  10  -3  668.93   33.00
   0 -10   3  719.43   32.30
   0  11  -3   -0.60    0.80
   0 -11  -3    1.50    0.60
   0 -11  -3    2.90    0.90
   0 -11   3   -0.90    0.80
   0 -11   3   -1.40    1.00
   0 -11  -3   -1.10    1.30
   0 -11   3    1.00    1.20
   0  12  -3   98.89    5.20
   0 -12   3  103.89    5.40
   0 -12   3  109.49    5.30
   0 -12  -3   85.59    5.10
   0 -12  -3  119.19    5.20
   0 -12  -3  109.49    5.50
   0 -13   3    0.70    1.40
   0 -13   3   -0.40    1.10
   0 -13  -3    0.90    1.50
   0 -13  -3    1.70    1.00
   0 -14   3    6.60    1.70
   0 -14   3    6.40    1.30
   0 -14  -3    7.30    1.80
   0 -14  -3    8.20    1.20
   0 -15  -3    0.10    1.80
   0 -15   3    1.50    1.70
   0 -15   3   -2.20    1.20
   0 -15  -3    0.50    1.10
   0 -16   3    5.90    1.50
   0 -16   3    9.20    2.00
   0 -16  -3    7.70    2.10
   0 -16  -3    6.50    1.30
   0 -17  -3   -1.90    2.00
   0 -17  -3   -0.60    1.20
   0 -17   3   -1.00    2.00
   0 -17   3   -1.10    1.40
   0 -18   3   17.60    2.50
   0 -18   3   11.40    1.70
   0 -18  -3   12.10    2.60
   0 -18  -3   10.90    1.50
   0 -19   3   -1.70    1.50
   0 -19  -3    0.80    2.30
   0 -19  -3    0.50    1.30
   0 -19   3    0.20    2.30
   0 -20   3   14.80    2.00
   0 -20  -3   11.70    2.80
   0 -20   3   18.00    2.90
   0 -21   3    0.40    1.70
   0 -21   3   -1.90    2.70
   0 -21  -3   -1.50    2.70
   0 -22   3   14.60    2.20
   0 -22  -3   20.80    3.40
   0 -22   3   22.50    3.50
  -1   0   3   -0.30    0.30
  -1   0   3    0.60    0.30
  -1   0  -3   -0.40    0.30
  -1   0  -3   -0.20    0.30
   1   0  -3   -0.40    0.30
   1   0   3   -0.30    0.30
   1   0  -3    0.20    0.30
   1   0   3   -0.80    0.30
  -1  -1   3    3.40    0.40
  -1   1  -3    2.50    0.40
   1  -1  -3    2.80    0.40
  -1  -1   3    4.20    0.50
   1  -1  -3    2.00    0.40
  -1  -1   3    2.80    0.40
  -1   1  -3    2.10    0.30
  -1   1  -3    2.10    0.40
  -1  -1  -3    3.90    0.40
  -1  -1  -3    2.70    0.40
   1   1  -3    3.70    0.50
  -1   1   3    1.90    0.40
  -1   1   3    3.10    0.40
   1   1  -3    4.20    0.40
   1  -1   3    2.30    0.40
   1  -1   3    2.10    0.40
   1  -1   3    2.10    0.40
  -1   2  -3   26.00    1.40
  -1  -2   3   23.70    1.30
  -1  -2   3   24.30    1.30
   1  -2  -3   23.00    1.30
  -1  -2   3   26.20    1.40
  -1  -2   3   27.60    1.30
   1  -2  -3   24.00    1.30
   1  -2   3   24.30    1.20
  -1  -2  -3   26.40    1.30
  -1  -2  -3   24.10    1.30
   1  -2   3   25.90    1.40
   1   2  -3   27.00    1.40
   1  -2   3   23.40    1.30
   1   2  -3   26.60    1.30
  -1   2   3   24.00    1.30
  -1  -3   3   31.80    1.60
  -1  -3   3   29.90    1.60
   1  -3  -3   27.40    1.60
  -1   3  -3   29.50    1.70
   1  -3  -3   27.10    1.60
  -1  -3   3   34.70    1.60
  -1   3   3   25.50    1.60
   1   3  -3   32.50    1.60
   1  -3   3   27.00    1.60
   1  -3   3   29.00    1.50
  -1  -3  -3   30.80    1.60
   1  -3   3   26.20    1.60
  -1  -4   3  178.68    7.30
   1  -4  -3  130.39    7.20
  -1   4  -3  159.58    7.30
  -1  -4   3  169.68    7.30
  -1  -4   3  152.68    7.10
   1  -4  -3  163.48    7.20
  -1   4   3  131.59    7.20
   1  -4   3  146.49    7.30
   1  -4   3  148.79    7.10
  -1  -4  -3  148.09    7.10
   1  -4   3  145.19    7.30
   1  -5  -3   43.10    2.20
   1  -5  -3   35.60    2.10
  -1  -5   3   41.40    2.10
  -1  -5   3   43.50    2.20
  -1  -5   3   37.90    2.20
  -1   5  -3   42.80    2.20
  -1  -5  -3   43.30    2.20
   1  -5   3   38.50    2.10
  -1   5   3   33.70    2.10
   1  -5   3   36.80    2.20
   1  -5   3   36.10    2.20
   1   5  -3   46.10    2.10
  -1  -6   3   19.50    1.40
  -1   6  -3   20.90    1.50
  -1  -6   3   19.50    1.30
   1  -6  -3   18.50    1.30
   1  -6  -3   23.00    1.60
  -1  -6   3   18.60    1.40
   1  -6   3   17.90    1.40
  -1  -6  -3   22.80    1.60
  -1   6   3   17.60    1.30
   1   6  -3   20.70    1.30
   1  -6   3   15.80    1.40
   1  -6   3   17.40    1.40
   1  -7  -3   17.20    1.50
   1  -7  -3   16.80    1.30
  -1   7  -3   16.70    1.40
  -1  -7   3   16.10    1.30
  -1  -7   3   18.10    1.30
  -1  -7   3   16.10    1.50
   1   7  -3   17.70    1.30
  -1   7   3   16.60    1.20
   1  -7   3   17.30    1.30
   1  -7   3   17.60    1.40
   1  -7   3   18.40    1.40
  -1  -7  -3   17.60    1.50
   1  -8  -3    9.50    1.00
  -1  -8   3   13.80    1.20
  -1  -8   3    9.50    1.00
  -1  -8   3   15.80    1.30
  -1   8  -3   15.40    1.30
   1  -8  -3   13.40    1.30
  -1   8   3    8.90    0.90
   1   8  -3   16.70    1.20
   1  -8   3   15.40    1.20
   1  -8   3   10.40    1.10
  -1  -8  -3   13.80    1.30
   1  -8   3   11.40    1.10
  -1  -9   3    5.30    0.90
   1  -9  -3    4.50    0.90
  -1   9  -3    4.40    0.90
   1  -9  -3    6.40    1.20
  -1  -9   3    4.40    0.80
  -1  -9  -3    7.30    1.20
   1  -9   3    6.50    1.10
   1  -9   3    3.30    0.90
  -1   9   3    5.10    0.80
   1  -9   3    4.50    1.00
   1   9  -3    5.40    0.80
  -1  10  -3    3.20    0.90
  -1 -10   3   -0.30    0.90
   1 -10  -3    0.80    0.50
   1 -10  -3    5.30    1.20
  -1 -10   3    0.10    0.80
   1 -10  -3    3.50    0.90
  -1 -10  -3    1.90    0.70
   1 -10   3    6.10    1.10
   1 -10   3    3.00    1.00
   1  10  -3    0.30    0.80
   1 -10   3    3.70    0.90
  -1  11  -3   39.70    2.60
  -1 -11   3   52.29    2.90
   1 -11  -3   53.29    3.00
  -1 -11   3   44.60    2.60
   1 -11   3   34.30    2.60
  -1 -11  -3   48.80    2.90
   1 -11   3   49.50    2.80
   1 -11   3   46.00    2.70
   1  11  -3   39.90    2.40
  -1 -12   3   16.80    1.50
   1 -12  -3   26.10    1.80
   1 -12  -3   20.10    1.90
  -1 -12   3   28.10    2.30
  -1  12  -3   20.60    1.80
   1 -12   3   21.20    1.90
  -1 -12  -3   19.20    1.90
  -1 -12  -3   17.70    1.50
   1 -12   3   26.50    2.20
  -1 -13   3   18.60    2.00
  -1 -13   3   22.60    1.90
   1 -13  -3   29.60    2.00
   1 -13  -3   17.60    2.00
   1 -13   3   18.20    1.90
   1 -13   3   23.70    2.10
  -1 -13  -3   22.40    2.10
   1 -14  -3    7.70    1.20
  -1 -14   3    6.60    1.20
   1 -14  -3    4.70    1.70
  -1 -14   3    7.00    1.60
  -1 -14  -3    5.60    1.70
   1 -14   3    4.60    1.30
   1 -14   3    4.60    1.60
  -1 -15   3   21.10    2.30
   1 -15  -3   25.00    2.40
   1 -15  -3   27.50    2.20
  -1 -15   3   19.60    1.80
  -1 -15  -3   23.00    2.40
   1 -15   3   23.50    2.30
   1 -15   3   20.70    1.90
   1 -16  -3   19.10    2.40
   1 -16  -3   19.10    1.80
  -1 -16   3   20.20    2.40
  -1 -16   3   18.50    1.80
   1 -16   3   22.80    2.40
  -1 -16  -3   16.80    2.40
   1 -16   3   17.70    1.90
   1 -17  -3   12.40    1.60
  -1 -17   3   11.40    2.20
   1 -17  -3   15.10    2.40
  -1 -17   3   13.00    1.70
   1 -17   3    9.90    1.70
  -1 -17  -3   12.70    2.30
   1 -17   3   13.70    2.30
   1 -18  -3    6.50    1.50
  -1 -18   3    3.70    1.50
   1 -18  -3    5.20    2.30
  -1 -18   3    3.30    2.20
   1 -18   3    5.80    1.60
   1 -18   3    5.00    2.20
  -1 -18  -3    1.70    2.20
  -1 -19   3    3.30    2.50
  -1 -19   3    6.30    1.60
   1 -19  -3    6.50    1.60
   1 -19  -3    8.70    2.50
   1 -19   3    3.70    1.70
   1 -19   3    9.00    2.40
  -1 -19  -3    5.60    2.40
   1 -20  -3    3.00    2.70
  -1 -20   3    4.00    1.60
  -1 -20   3    4.00    2.60
   1 -20  -3    4.80    1.60
   1 -20   3    4.40    1.80
   1 -20   3    5.60    2.50
  -1 -20  -3    6.20    2.60
   1 -21  -3    7.70    2.80
  -1 -21   3    3.80    2.80
  -1 -21   3    4.20    1.70
  -1 -21  -3    3.90    2.80
   1 -21   3    5.00    1.90
   1 -21   3    8.80    2.90
  -1 -22   3    2.50    2.90
   1 -22  -3    2.80    2.90
   1 -22   3    0.90    2.90
  -1 -22  -3    2.50    3.00
   1 -22   3    1.90    1.90
   2   0  -3    2.40    0.40
  -2   0   3    1.50    0.30
   2   0   3    1.20    0.30
  -2   0  -3    1.90    0.20
  -2   0  -3    1.60    0.30
   2   0  -3    1.80    0.30
  -2   0   3    2.30    0.40
   2   0   3    1.90    0.30
  -2   0  -3    2.20    0.30
   2   1   3    1.00    0.30
  -2  -1   3    0.60    0.30
   2  -1  -3    0.50    0.30
   2  -1  -3    1.20    0.40
  -2  -1   3    1.60    0.30
   2   1   3    0.50    0.30
  -2   1  -3    0.20    0.30
  -2   1  -3    0.40    0.40
  -2   1   3    0.40    0.40
  -2  -1  -3    0.70    0.30
  -2  -1  -3    1.10    0.30
   2  -1   3    0.10    0.40
  -2  -1  -3   -0.30    0.30
  -2   1   3    0.20    0.30
   2   1  -3    1.80    0.30
   2   1  -3    0.80    0.30
   2  -1   3    0.30    0.30
   2   2   3    1.70    0.30
  -2   2  -3    1.30    0.50
   2   2   3    2.10    0.30
  -2  -2   3    3.30    0.50
  -2  -2   3    1.60    0.40
  -2  -2   3    2.20    0.50
   2  -2  -3    0.90    0.50
   2  -2  -3    0.70    0.50
  -2  -2  -3    1.20    0.30
   2   2  -3    1.70    0.40
   2  -2   3    2.20    0.50
  -2  -2  -3    2.20    0.40
  -2   2   3    1.90    0.50
   2  -2   3    1.70    0.50
   2  -3  -3  165.88    7.90
  -2  -3   3  172.48    7.70
  -2  -3   3  166.38    8.10
   2  -3  -3  157.88    7.80
  -2  -3   3  167.38    7.80
  -2  -3   3  160.98    7.80
  -2   3  -3  170.88    7.90
   2  -3   3  161.08    7.60
  -2   3   3  171.08    7.90
  -2  -3  -3  158.08    7.70
   2  -3   3  162.88    7.90
   2   3  -3  169.78    7.80
   2  -3   3  153.78    7.90
  -2   4  -3   94.79    4.60
  -2  -4   3   93.99    4.50
   2  -4  -3   89.09    4.60
  -2  -4   3   92.29    4.50
   2  -4   3   90.19    4.60
   2  -4   3   86.89    4.60
   2  -4   3   95.09    4.40
  -2  -4  -3   96.29    4.50
  -2   4   3   89.19    4.60
   2   4  -3  104.79    4.50
  -2   5  -3   25.40    1.60
  -2  -5   3   20.70    1.40
  -2  -5   3   27.40    1.50
   2  -5  -3   24.20    1.60
  -2  -5   3   24.40    1.60
   2   5  -3   28.10    1.50
  -2  -5  -3   25.40    1.60
   2  -5   3   24.80    1.50
   2  -5   3   22.10    1.60
  -2   5   3   24.20    1.60
   2  -5   3   24.00    1.60
   2  -6  -3   52.99    3.00
  -2   6  -3   63.09    3.10
   2  -6  -3   49.70    3.00
  -2  -6   3   65.49    3.00
  -2  -6   3   58.59    3.00
   2  -6  -3   57.89    3.00
  -2   6   3   55.49    3.00
  -2  -6  -3   60.89    3.10
   2  -6   3   58.09    2.90
   2  -6   3   58.39    3.00
   2  -6   3   51.39    3.00
   2   6  -3   60.59    2.90
  -2  -7   3   18.30    1.50
   2  -7  -3   15.50    1.30
  -2  -7   3   17.70    1.30
   2  -7  -3   18.50    1.50
   2  -7  -3   17.90    1.40
  -2   7  -3   17.40    1.40
  -2  -7  -3   16.50    1.50
   2  -7   3   16.10    1.40
   2   7  -3   17.50    1.20
   2  -7   3   16.50    1.40
   2  -7   3   17.10    1.50
  -2   7   3   16.80    1.40
   2  -8  -3   61.99    3.50
  -2   8  -3   65.99    3.50
  -2  -8   3   69.79    3.50
   2  -8  -3   67.89    3.60
  -2  -8   3   73.69    3.40
   2  -8   3   57.09    3.50
   2   8  -3   67.19    3.40
  -2  -8  -3   70.89    3.60
   2  -8   3   72.69    3.50
  -2   8   3   61.19    3.40
   2  -8   3   71.09    3.60
   2  -9  -3  136.99    7.30
  -2   9  -3  147.89    7.30
   2  -9  -3  152.28    7.30
  -2  -9   3  155.18    7.30
  -2  -9   3  152.38    7.20
   2  -9  -3  160.88    7.30
  -2   9   3  144.29    7.20
   2   9  -3  139.19    7.20
   2  -9   3  151.78    7.30
   2  -9   3  148.99    7.20
  -2  -9  -3  159.08    7.30
   2 -10  -3    9.80    1.40
   2 -10  -3   13.00    1.20
  -2 -10   3   12.20    1.40
  -2 -10   3    9.00    1.10
   2 -10  -3   12.50    1.20
  -2  10  -3   10.40    1.20
  -2  10   3    9.90    1.00
  -2 -10  -3   12.60    1.50
   2 -10   3   10.70    1.30
   2 -10   3   11.00    1.30
   2 -11  -3   72.19    4.00
  -2 -11   3   77.79    4.20
   2 -11  -3   79.49    4.20
  -2  11  -3   72.09    4.00
  -2 -11   3   76.79    4.00
   2 -11  -3   88.59    4.10
   2 -11   3   76.59    4.10
  -2 -11  -3   77.39    4.20
  -2  11   3   71.09    3.90
   2 -11   3   80.09    4.10
  -2  12  -3    5.70    1.10
  -2 -12   3    7.60    1.10
   2 -12  -3    5.30    1.50
   2 -12  -3    7.90    1.20
  -2 -12   3    7.70    1.50
  -2  12   3    6.80    0.90
   2 -12   3    4.10    1.40
   2 -12   3    4.10    1.20
  -2 -12  -3    8.20    1.50
   2 -13  -3    7.80    1.60
  -2 -13   3    7.50    1.60
   2 -13  -3    8.70    1.20
  -2 -13   3    4.00    1.20
  -2  13  -3    4.70    1.20
   2 -13   3    6.70    1.30
  -2 -13  -3    6.10    1.60
   2 -13   3    8.10    1.60
   2 -14  -3   -0.40    1.60
  -2 -14   3    0.80    1.60
   2 -14  -3    1.00    1.20
  -2 -14   3    1.40    1.10
   2 -14   3   -2.70    1.50
  -2 -14  -3   -1.00    1.60
   2 -14   3    1.10    1.30
  -2 -15   3    1.10    1.20
   2 -15  -3    2.40    1.80
   2 -15  -3    2.20    1.30
  -2 -15   3    1.70    1.80
   2 -15   3    4.40    1.70
   2 -15   3    3.30    1.40
  -2 -15  -3    3.30    1.80
  -2 -16   3   12.90    2.30
  -2 -16   3   17.10    1.70
   2 -16  -3   17.20    1.80
   2 -16  -3   21.50    2.40
   2 -16   3   16.20    1.90
  -2 -16  -3   21.20    2.40
   2 -16   3   16.70    2.30
  -2 -17   3   11.70    1.60
   2 -17  -3   12.10    2.30
   2 -17  -3   14.20    1.70
  -2 -17   3   12.80    2.40
   2 -17   3    9.90    2.20
   2 -17   3   10.30    1.80
  -2 -17  -3   10.10    2.30
  -2 -18   3    3.40    2.30
  -2 -18   3    5.30    1.50
   2 -18  -3    6.80    1.60
   2 -18  -3   -1.10    2.10
   2 -18   3    4.20    2.20
  -2 -18  -3    4.90    2.40
   2 -18   3    6.30    1.70
   2 -19  -3   13.80    2.70
   2 -19  -3   10.60    1.80
  -2 -19   3    9.40    2.50
  -2 -19   3   10.20    1.70
   2 -19   3   11.20    1.90
   2 -19   3   16.30    2.70
  -2 -19  -3   10.20    2.60
   2 -20  -3    9.30    1.80
   2 -20  -3   10.70    2.90
  -2 -20   3    9.40    2.80
  -2 -20   3   10.30    1.80
   2 -20   3   12.20    2.00
   2 -20   3   10.50    2.70
  -2 -20  -3   13.80    2.80
   2 -21  -3   15.50    2.10
  -2 -21   3   18.20    3.30
   2 -21  -3   18.10    3.10
  -2 -21  -3   17.90    3.20
   2 -21   3   18.70    2.30
   2 -21   3   16.70    3.10
   2 -22  -3    3.90    3.20
  -2 -22   3   -2.60    2.90
  -2 -22  -3    1.10    3.00
   2 -22   3    5.10    2.90
   2 -22   3   -0.50    1.90
  -3   0   3   21.20    1.30
  -3   0  -3   20.30    1.30
  -3   0  -3   22.20    1.20
   3   0   3   20.50    1.30
   3  -1  -3   13.60    1.10
  -3   1  -3   11.30    1.10
  -3  -1   3   18.50    1.10
  -3  -1   3   14.50    1.00
   3   1   3   12.90    1.00
  -3  -1  -3   16.60    0.90
  -3  -1  -3   10.70    1.00
   3  -1   3   13.40    1.10
   3   1  -3   17.30    1.10
  -3  -1  -3   10.80    0.90
   3   2   3  109.19    5.20
   3  -2  -3  110.19    5.30
  -3  -2   3  103.09    5.30
  -3  -2   3  109.69    5.40
  -3  -2   3  110.49    5.30
  -3   2  -3  104.39    5.30
  -3  -2  -3  110.19    5.20
   3  -2   3  112.49    5.30
  -3  -2  -3  114.99    5.30
  -3   2   3  107.09    5.30
   3   2  -3  111.09    5.30
  -3   3  -3    2.50    0.80
  -3  -3   3   -1.20    0.60
  -3  -3   3    1.50    0.60
  -3  -3   3    0.90    0.70
   3  -3  -3   -0.30    0.70
   3  -3  -3    0.90    0.80
   3   3  -3    1.60    0.60
   3  -3   3    0.30    0.70
  -3   3   3   -0.10    0.70
  -3  -3  -3    2.00    0.70
  -3  -4   3  178.38    8.80
  -3  -4   3  194.78    8.80
   3  -4  -3  180.68    8.90
  -3  -4   3  190.58    8.70
  -3   4  -3  189.78    8.90
   3  -4  -3  160.68    8.90
  -3  -4  -3  188.48    8.70
   3  -4   3  186.78    8.90
   3   4  -3  194.38    8.80
  -3   4   3  184.18    8.90
   3  -4   3  194.88    8.60
   3  -5  -3  136.69    7.50
  -3   5  -3  158.68    7.50
  -3  -5   3  165.68    7.40
   3  -5  -3  149.29    7.50
  -3  -5   3  155.88    7.30
   3  -5   3  159.38    7.30
  -3   5   3  161.08    7.50
   3  -5   3  147.89    7.50
   3   5  -3  158.18    7.40
  -3  -5  -3  163.08    7.40
  -3  -6   3    9.40    0.80
   3  -6  -3    7.30    0.90
   3  -6  -3    6.60    0.90
  -3   6  -3    8.90    1.00
  -3  -6   3    7.50    1.00
   3  -6   3    7.40    1.00
  -3  -6  -3    6.20    1.00
   3  -6   3    6.90    0.80
   3   6  -3    8.30    0.70
  -3   6   3    8.50    1.00
   3  -7  -3    0.40    0.70
   3  -7  -3   -0.10    0.80
  -3  -7   3    0.60    0.60
  -3  -7   3    0.10    0.10
   3  -7  -3   -0.60    0.80
  -3  -7   3    0.10    0.90
  -3   7  -3    0.80    0.80
   3   7  -3    0.20    0.50
   3  -7   3    1.10    0.80
  -3   7   3    0.20    0.80
  -3  -7  -3   -0.10    0.90
   3  -7   3   -0.40    0.70
   3  -8  -3    9.80    1.20
   3  -8  -3   13.20    1.30
   3  -8  -3   20.10    1.70
  -3  -8   3   15.20    1.40
  -3   8  -3   14.50    1.30
   3  -8   3   19.90    1.50
   3  -8   3   17.10    1.40
  -3   8   3   13.60    1.30
  -3  -8  -3   21.50    1.70
   3  -9  -3   25.90    1.90
  -3  -9   3   29.50    2.10
   3  -9  -3   24.10    2.10
  -3  -9   3   25.70    1.80
  -3   9  -3   28.20    2.00
   3  -9  -3   28.80    2.00
  -3  -9  -3   27.00    2.10
   3  -9   3   24.50    2.00
  -3   9   3   27.10    1.90
   3  -9   3   30.90    2.10
  -3 -10   3   25.10    2.20
   3 -10  -3   25.60    1.90
   3 -10  -3   21.50    1.80
  -3 -10   3   22.30    1.70
  -3  10  -3   21.60    1.90
   3 -10  -3   19.90    1.80
   3 -10   3   22.50    1.90
  -3  10   3   23.70    1.70
  -3 -10  -3   26.70    2.10
   3 -10   3   24.70    2.00
  -3 -11   3    6.20    1.00
   3 -11  -3    6.10    1.40
   3 -11  -3    4.10    1.00
  -3 -11   3    7.00    1.40
  -3  11  -3    5.40    1.10
   3 -11  -3    8.00    1.20
   3 -11   3    7.20    1.30
   3 -11   3    6.70    1.20
  -3  11   3    6.40    1.00
  -3 -11  -3    6.00    1.40
   3 -12  -3   28.50    2.20
   3 -12  -3   31.00    2.50
  -3 -12   3   34.60    2.50
  -3 -12   3   28.70    2.00
  -3  12  -3   23.90    2.10
   3 -12   3   28.10    2.20
  -3  12   3   20.40    1.90
   3 -12   3   19.30    1.90
  -3 -13   3   12.20    1.80
  -3 -13   3   12.10    1.30
   3 -13  -3   10.20    1.70
   3 -13  -3   14.50    1.50
  -3  13  -3   10.50    1.40
  -3 -13  -3   13.00    1.80
   3 -13   3   13.30    1.60
   3 -13   3    9.50    1.60
   3 -14  -3   45.50    2.90
  -3 -14   3   42.70    3.30
  -3 -14   3   40.30    2.70
   3 -14  -3   43.90    3.30
   3 -14   3   43.20    3.00
  -3 -14  -3   42.10    3.20
   3 -14   3   40.80    3.20
  -3 -15   3   15.90    1.60
   3 -15  -3   19.40    1.90
  -3 -15   3   22.00    2.30
   3 -15  -3   18.00    2.20
   3 -15   3   21.00    2.20
   3 -15   3   18.90    1.90
  -3 -15  -3   17.00    2.30
  -3 -16   3   12.60    1.50
  -3 -16   3   15.80    2.30
   3 -16  -3   15.80    1.80
   3 -16  -3   18.20    2.30
   3 -16   3   10.40    2.10
  -3 -16  -3   15.00    2.30
   3 -16   3   12.80    1.90
   3 -17  -3   10.00    1.80
  -3 -17   3    9.20    1.50
   3 -17  -3    9.50    2.30
  -3 -17   3   13.00    2.40
  -3 -17  -3    9.40    2.30
   3 -17   3   10.40    1.90
   3 -17   3    9.30    2.10
  -3 -18   3   11.80    2.50
   3 -18  -3   14.90    2.50
   3 -18  -3   13.30    1.90
   3 -18   3   10.50    1.90
  -3 -18  -3   12.00    2.40
   3 -18   3   14.40    2.40
   3 -19  -3    4.50    2.50
   3 -19  -3    7.30    1.80
  -3 -19   3    6.00    2.50
   3 -19   3    6.70    1.90
   3 -19   3    6.80    2.40
  -3 -19  -3    4.80    2.50
  -3 -20   3   13.00    2.80
   3 -20  -3    9.40    2.80
   3 -20  -3    9.30    1.90
  -3 -20  -3   11.10    2.80
   3 -20   3    6.90    2.60
   3 -20   3    6.60    2.00
   3 -21  -3    2.80    2.90
  -3 -21   3    5.30    2.80
   3 -21  -3    5.90    1.90
   3 -21   3    8.20    2.80
   3 -21   3    4.60    2.00
  -3 -21  -3    0.00    2.80
  -3 -22   3   -0.30    3.00
   3 -22  -3    1.40    1.90
   3 -22  -3    1.40    2.90
   3 -22   3    1.70    2.00
   3 -22   3    2.60    2.90
  -3 -22  -3    5.40    2.90
   4   0   3    2.20    0.80
   4   0  -3    2.50    0.80
  -4   0   3    5.60    0.80
  -4   0  -3    3.70    0.70
  -4   0  -3    3.10    0.80
   4   1   3    7.70    0.80
  -4  -1   3    8.40    0.90
   4  -1  -3    7.50    0.90
   4   1   3   10.60    0.80
  -4   1  -3    7.00    0.90
  -4  -1   3   10.10    0.90
   4   1  -3    9.20    0.90
  -4  -1  -3    6.10    0.90
  -4  -1  -3    7.00    0.80
  -4   1   3    7.80    0.90
   4  -1   3    7.70    0.90
   4  -2  -3  187.98    8.90
  -4  -2   3  187.78    9.00
  -4  -2   3  179.38    8.80
  -4   2  -3  190.98    8.90
   4   2   3  185.98    8.80
  -4  -2   3  172.38    8.80
  -4  -2  -3  164.38    8.80
  -4  -2  -3  190.88    8.80
  -4  -2  -3  194.08    8.60
   4   2  -3  190.38    8.80
   4  -2   3  185.48    8.90
  -4   2   3  188.78    8.90
   4  -3  -3   10.10    1.10
  -4  -3   3   13.20    1.00
   4   3   3   10.20    0.90
  -4   3  -3   11.10    1.10
  -4   3   3    9.60    1.00
  -4  -3  -3    8.80    0.80
   4   3  -3   16.10    1.10
   4  -3   3   10.00    1.10
  -4  -4   3   11.90    0.90
  -4   4  -3   10.00    1.10
   4  -4  -3   11.30    1.10
  -4  -4   3   11.00    1.10
  -4  -4   3    9.40    0.80
  -4  -4   3   11.50    1.00
   4  -4   3    9.80    1.10
  -4  -4  -3   13.20    1.00
  -4   4   3    8.80    1.00
   4   4  -3   12.00    0.90
   4  -5  -3   37.20    2.50
  -4  -5   3   52.99    2.30
  -4   5  -3   43.10    2.50
  -4  -5   3   38.20    2.20
  -4  -5   3   45.70    2.40
   4   5  -3   45.90    2.30
   4  -5   3   40.60    2.50
  -4  -5  -3   48.50    2.50
  -4   5   3   38.70    2.50
  -4   6  -3   47.50    2.70
  -4  -6   3   43.90    2.60
  -4  -6   3   49.20    2.50
   4  -6  -3   47.70    2.70
   4   6  -3   47.20    2.40
   4  -6   3   46.90    2.50
  -4  -6  -3   49.80    2.60
   4  -6   3   46.20    2.70
  -4   6   3   47.90    2.70
  -4  -7   3   77.39    4.00
  -4  -7   3   77.69    3.90
  -4   7  -3   80.79    4.10
   4  -7  -3   78.79    4.10
   4   7  -3   76.49    3.80
   4  -7   3   78.19    4.10
  -4   7   3   77.09    4.10
  -4  -7  -3   78.69    4.00
   4  -7   3   82.29    3.90
  -4   8  -3  227.08   11.00
   4  -8  -3  230.48   10.70
  -4  -8   3  221.38   10.70
   4  -8  -3  237.28   10.90
  -4  -8   3  227.58   10.80
  -4   8   3  228.58   10.90
  -4  -8  -3  229.58   10.70
   4  -8   3  222.78   10.90
   4  -8   3  219.18   10.60
   4  -9  -3   21.60    1.70
  -4  -9   3   22.00    1.60
  -4   9  -3   21.10    1.90
   4  -9  -3   24.90    1.80
  -4  -9   3   23.40    2.00
  -4  -9  -3   26.30    2.00
  -4   9   3   24.00    1.80
   4  -9   3   21.80    1.90
   4  -9   3   22.00    1.80
  -4  10  -3   43.10    2.70
   4 -10  -3   43.70    2.70
   4 -10  -3   45.00    2.70
  -4 -10   3   40.60    2.40
  -4 -10   3   35.40    2.30
  -4 -10   3   43.60    2.80
  -4 -10  -3   46.40    2.80
   4 -10   3   40.80    2.60
  -4  10   3   44.10    2.60
   4 -10   3   45.20    2.70
  -4  11  -3   29.30    2.30
  -4 -11   3   33.40    2.10
   4 -11  -3   30.30    2.50
  -4 -11   3   27.40    1.90
  -4 -11   3   39.90    2.60
   4 -11  -3   34.20    2.40
   4 -11   3   33.50    2.40
  -4  11   3   28.00    2.10
   4 -11   3   33.50    2.30
  -4 -11  -3   35.40    2.60
  -4  12  -3   48.80    3.20
  -4 -12   3   54.29    3.10
   4 -12  -3   57.99    3.50
  -4 -12   3   52.69    3.40
   4 -12  -3   59.09    3.30
  -4  12   3   53.19    3.10
  -4 -12  -3   59.39    3.50
   4 -12   3   56.59    3.30
   4 -12   3   55.49    3.30
   4 -13  -3    0.80    1.50
   4 -13  -3   -0.90    1.30
  -4 -13   3    0.30    1.50
  -4 -13   3    1.20    1.00
  -4  13  -3    2.90    1.20
   4 -13   3    1.70    1.30
   4 -13   3    1.10    1.40
  -4 -13  -3   -0.10    1.50
   4 -14  -3    2.70    1.40
  -4 -14   3    1.30    1.10
  -4 -14   3    2.80    1.70
   4 -14  -3    2.70    1.70
   4 -14   3   -3.40    1.50
   4 -14   3    4.90    1.40
  -4 -14  -3    1.90    1.70
   4 -15  -3    1.70    1.80
   4 -15  -3    3.30    1.50
  -4 -15   3    4.70    1.90
  -4 -15   3    2.50    1.20
  -4 -15  -3    2.00    1.90
   4 -15   3    2.40    1.60
   4 -15   3    3.50    1.70
  -4 -16   3    1.90    2.00
   4 -16  -3    2.80    1.90
  -4 -16   3    1.50    1.30
   4 -16  -3    2.80    1.60
  -4 -16  -3    3.60    2.00
   4 -16   3    5.60    1.70
   4 -16   3    0.00    1.80
   4 -17  -3    9.30    1.80
   4 -17  -3    8.70    2.30
  -4 -17   3   14.30    2.40
  -4 -17  -3    5.60    2.30
   4 -17   3   13.00    2.20
   4 -17   3    9.90    1.90
  -4 -18   3   11.70    2.50
   4 -18  -3    7.20    2.40
   4 -18  -3    6.40    1.80
   4 -18   3    7.00    1.90
  -4 -18  -3    8.10    2.40
   4 -18   3    6.20    2.20
   4 -19  -3   17.90    2.80
  -4 -19   3   12.50    2.70
   4 -19  -3   12.20    2.00
   4 -19   3   12.50    2.60
  -4 -19  -3    9.20    2.60
   4 -19   3   10.40    2.20
  -4 -20   3   15.60    2.90
   4 -20  -3   18.70    2.30
   4 -20  -3   14.20    2.80
   4 -20   3   17.70    2.40
  -4 -20  -3   13.90    2.90
   4 -20   3   13.50    2.90
   4 -21  -3    6.10    2.00
   4 -21  -3    8.60    3.00
  -4 -21   3    5.20    2.90
   4 -21   3    4.90    2.80
  -4 -21  -3    4.80    2.80
   4 -21   3    8.20    2.20
   5   0   3   12.30    1.10
  -5   0  -3   11.30    1.10
  -5   0   3    8.40    1.00
   5  -1  -3    3.30    0.90
  -5  -1   3    4.10    0.80
  -5   1  -3    2.40    0.90
   5   1   3    2.60    0.80
  -5   1   3    2.60    0.80
  -5  -1  -3    2.20    0.80
   5  -1   3    2.50    0.90
  -5  -1  -3    2.80    0.70
   5   1  -3    3.00    0.80
   5  -2  -3   23.20    1.60
   5   2   3   14.70    1.30
  -5  -2   3   19.50    1.40
  -5   2  -3   19.20    1.60
  -5  -2  -3   16.50    1.40
  -5   2   3   25.40    1.60
  -5  -2  -3   12.70    1.20
   5  -2   3   16.60    1.40
  -5  -3   3  296.07   14.00
   5   3   3  288.97   13.60
  -5   3  -3  291.17   13.70
  -5  -3   3  287.37   13.70
   5  -3  -3  279.77   13.70
  -5  -3   3  270.67   13.70
  -5  -3  -3  295.97   13.40
  -5  -3  -3  290.17   13.60
   5   3  -3  298.77   13.70
   5  -3   3  280.57   13.70
  -5   3   3  291.47   13.70
  -5  -4   3   76.59    3.80
  -5  -4   3   76.89    4.00
  -5  -4   3   66.09    3.70
   5  -4  -3   77.69    3.90
  -5   4  -3   77.29    3.90
  -5   4   3   76.69    3.90
  -5  -4  -3   73.29    3.70
  -5  -4  -3   80.69    3.70
   5  -4   3   70.69    3.90
   5   4  -3   74.69    3.70
  -5   5  -3    7.50    1.10
   5  -5  -3    5.50    1.00
  -5  -5   3    7.40    1.00
  -5  -5   3    7.20    0.70
  -5  -5   3    8.50    0.80
   5   5  -3    7.80    0.80
  -5   5   3    6.00    1.00
  -5  -5  -3    6.40    1.00
   5  -5   3    4.60    1.00
  -5  -6   3   27.00    1.90
  -5   6  -3   25.80    1.90
   5  -6  -3   24.00    1.90
  -5  -6   3   25.40    1.60
   5   6  -3   25.70    1.60
  -5   6   3   26.90    1.90
  -5  -6  -3   24.00    1.90
   5  -6   3   26.60    1.90
  -5   7  -3   30.70    2.30
  -5  -7   3   34.00    2.20
  -5  -7   3   31.40    1.90
   5  -7  -3   27.80    2.20
   5  -7   3   32.40    1.90
  -5   7   3   29.30    2.10
   5  -7   3   27.60    2.20
  -5  -7  -3   31.70    2.20
  -5   8  -3   19.70    1.70
   5  -8  -3   20.30    1.90
  -5  -8   3   22.20    1.90
  -5  -8   3   19.40    1.50
   5  -8   3   22.00    2.00
  -5  -8  -3   24.50    1.90
   5  -8   3   19.80    1.70
  -5   8   3   21.30    1.90
   5  -9  -3   12.00    1.40
  -5  -9   3   12.20    1.10
   5  -9  -3   11.60    1.40
  -5  -9   3   11.60    1.50
  -5   9  -3   12.20    1.40
   5  -9   3   11.90    1.20
  -5   9   3   12.50    1.30
   5  -9   3   11.60    1.40
  -5  -9  -3   12.60    1.50
  -5 -10   3    6.20    0.90
   5 -10  -3    1.30    1.20
  -5 -10   3    4.10    0.80
   5 -10  -3    6.00    1.20
  -5  10  -3    6.00    1.20
  -5 -10   3    3.90    1.30
   5 -10   3    3.90    1.10
  -5 -10  -3    5.60    1.30
  -5  10   3    4.60    1.10
   5 -10   3    5.30    1.20
  -5 -11   3   10.30    1.10
  -5  11  -3    8.40    1.40
   5 -11  -3   11.70    1.50
  -5 -11   3    9.30    1.50
   5 -11  -3    9.80    1.40
  -5 -11   3    8.90    1.00
  -5 -11  -3    9.00    1.50
  -5  11   3   11.10    1.30
   5 -11   3    7.40    1.30
   5 -11   3    9.30    1.40
  -5 -12   3   16.50    1.80
   5 -12  -3   16.70    1.80
  -5 -12   3   16.90    1.40
  -5  12  -3   12.10    1.60
   5 -12  -3   19.60    1.70
   5 -12   3   16.20    1.70
  -5 -12  -3   13.20    1.80
  -5  12   3   15.10    1.50
   5 -12   3   11.40    1.70
   5 -13  -3   28.00    2.50
   5 -13  -3   29.60    2.30
  -5 -13   3   29.20    2.00
  -5  13  -3   21.70    2.00
  -5 -13   3   22.50    2.30
  -5 -13  -3   21.60    2.30
   5 -13   3   24.40    2.10
   5 -13   3   27.10    2.20
   5 -14  -3   15.50    2.10
  -5 -14   3   14.80    1.40
   5 -14  -3   16.00    1.80
  -5 -14   3   15.90    2.10
   5 -14   3   12.20    1.90
   5 -14   3   14.00    1.90
  -5 -14  -3   14.30    2.20
   5 -15  -3   33.80    2.80
   5 -15  -3   32.80    2.70
  -5 -15   3   25.50    2.70
   5 -15   3   28.30    2.50
   5 -15   3   31.40    2.90
  -5 -15  -3   28.10    2.80
   5 -16  -3   19.00    2.40
  -5 -16   3   16.90    2.40
   5 -16  -3   20.00    2.10
  -5 -16  -3   13.90    2.40
   5 -16   3   16.60    2.20
   5 -16   3   17.80    2.10
  -5 -17   3    9.90    2.20
   5 -17  -3    9.30    2.30
   5 -17  -3    8.10    1.80
   5 -17   3    6.30    2.00
  -5 -17  -3    7.40    2.30
   5 -17   3    5.20    1.80
   5 -18  -3    7.00    1.90
   5 -18  -3    8.00    2.40
  -5 -18   3    3.50    2.30
  -5 -18  -3    5.40    2.30
   5 -18   3    9.70    2.30
   5 -18   3    6.70    2.00
  -5 -19   3   10.60    2.50
   5 -19  -3   15.20    2.80
   5 -19  -3   10.20    2.10
   5 -19   3   11.50    2.50
   5 -19   3    9.70    2.20
  -5 -19  -3    8.70    2.70
   5 -20  -3    0.30    2.60
  -5 -20   3    2.90    2.60
   5 -20  -3    4.10    2.00
   5 -20   3    2.30    2.50
   5 -20   3    3.30    2.10
  -5 -20  -3   -1.00    2.60
  -5 -21   3    5.00    2.90
   5 -21  -3    3.90    2.10
   5 -21  -3    7.80    2.90
   5 -21   3    1.50    2.20
  -5 -21  -3    6.10    2.80
   5 -21   3    4.30    2.60
   6   0   3   -0.80    0.80
  -6   0  -3    0.60    0.80
  -6   0  -3    0.20    0.40
  -6   0   3    0.60    0.80
   6   0  -3    0.50    0.80
   6  -1  -3   40.80    2.40
   6   1   3   37.10    2.20
  -6   1  -3   39.90    2.30
  -6   1   3   39.40    2.30
   6  -1   3   38.90    2.30
  -6  -1  -3   37.80    2.30
   6   1  -3   40.80    2.30
  -6  -2   3   10.80    1.10
   6  -2  -3   12.90    1.20
  -6   2  -3   12.80    1.20
  -6  -2   3   14.40    1.10
   6   2   3   12.70    1.00
  -6  -2  -3   11.40    1.10
  -6  -2  -3   11.90    1.00
   6  -2   3   11.00    1.20
   6   2  -3   12.00    1.10
  -6   2   3   11.20    1.20
   6   3   3    0.90    0.70
   6  -3  -3    2.60    1.00
  -6  -3   3    7.50    0.90
  -6  -3   3    4.70    0.70
  -6   3  -3    3.10    1.00
   6   3  -3    6.00    0.80
   6  -3   3    2.30    1.00
  -6  -3  -3    0.00    0.80
  -6   3   3    3.50    1.00
  -6  -3  -3   -0.40    0.70
  -6  -3  -3    5.80    0.80
   6  -4  -3   52.09    3.00
  -6  -4   3   49.10    2.80
  -6   4  -3   53.19    3.00
   6   4   3   52.79    2.70
  -6  -4   3   52.89    3.00
  -6  -4   3   57.79    2.90
  -6  -4  -3   50.19    2.80
  -6  -4  -3   59.79    2.90
   6   4  -3   51.89    2.80
  -6   4   3   54.29    3.00
   6  -4   3   52.29    3.00
   6  -5  -3    9.00    1.20
  -6  -5   3   10.30    1.00
  -6  -5   3    8.20    0.80
  -6   5  -3    8.50    1.20
  -6  -5  -3   10.90    1.10
   6   5  -3   11.50    0.90
  -6   5   3   10.90    1.20
   6  -5   3    7.60    1.20
  -6  -5  -3    6.60    0.80
  -6  -6   3   30.10    1.90
   6  -6  -3   32.40    2.30
  -6   6  -3   36.50    2.40
  -6  -6   3   36.10    2.10
  -6  -6   3   36.30    2.30
  -6  -6  -3   37.10    2.20
   6  -6   3   34.20    2.30
   6   6  -3   33.50    2.00
  -6   6   3   32.40    2.30
  -6  -7   3  281.47   13.60
  -6  -7   3  297.37   13.40
   6  -7  -3  292.37   13.70
  -6   7  -3  286.07   13.80
  -6   7   3  291.67   13.70
   6  -7   3  281.37   13.70
   6   7  -3  276.47   13.50
  -6  -7  -3  284.47   13.40
  -6  -8   3    8.40    1.00
  -6  -8   3    6.40    1.30
  -6   8  -3    8.10    1.30
   6  -8  -3    7.00    1.30
   6  -8   3    7.90    1.10
  -6  -8  -3    6.80    1.30
  -6   8   3    6.50    1.20
   6  -8   3    8.10    1.30
  -6   9  -3  139.39    6.90
   6  -9  -3  142.89    6.90
  -6  -9   3  139.19    6.70
  -6  -9   3  136.29    6.80
   6  -9   3  143.29    7.00
   6  -9   3  136.89    6.70
  -6   9   3  133.69    6.90
  -6  -9  -3  132.69    6.80
   6 -10  -3   36.10    2.50
  -6  10  -3   35.50    2.60
  -6 -10   3   36.00    2.60
  -6 -10   3   32.80    2.10
   6 -10  -3   36.60    2.60
  -6 -10   3   35.80    2.20
  -6 -10  -3   36.80    2.60
   6 -10   3   35.20    2.40
   6 -10   3   35.30    2.60
  -6  10   3   34.00    2.50
   6 -11  -3   54.69    3.10
   6 -11  -3   46.20    3.10
  -6 -11   3   39.90    2.60
  -6  11  -3   49.70    3.10
  -6 -11   3   50.69    2.80
  -6 -11   3   47.10    3.10
   6 -11   3   43.10    2.90
  -6  11   3   51.29    3.00
  -6 -11  -3   47.20    3.20
   6 -11   3   51.99    3.10
   6 -12  -3   18.20    1.80
  -6 -12   3   19.30    2.00
   6 -12  -3   14.50    1.80
  -6 -12   3   19.60    1.70
  -6  12  -3   14.80    1.70
  -6  12   3   14.00    1.60
   6 -12   3   19.10    1.70
   6 -12   3   15.60    1.80
  -6 -12  -3   16.20    1.90
  -6 -13   3   22.50    2.30
  -6  13  -3   23.00    2.10
   6 -13  -3   31.70    2.60
   6 -13  -3   26.20    2.20
  -6 -13  -3   20.70    2.30
   6 -13   3   22.10    2.10
   6 -13   3   24.10    2.10
   6 -14  -3    7.00    1.80
   6 -14  -3    5.60    1.70
  -6 -14   3    6.20    1.90
  -6 -14  -3    3.40    1.90
   6 -14   3    4.60    1.70
   6 -14   3    6.10    1.70
   6 -15  -3    1.60    1.80
  -6 -15   3   -0.90    1.90
   6 -15  -3    1.70    1.60
  -6 -15  -3    0.70    1.90
   6 -15   3    2.00    1.70
   6 -15   3    2.10    1.70
   6 -16  -3    4.50    2.10
  -6 -16   3    6.40    2.10
   6 -16  -3    5.80    1.80
   6 -16   3    3.40    1.90
   6 -16   3    8.00    1.90
  -6 -16  -3    5.10    2.20
  -6 -17   3    3.30    2.10
   6 -17  -3    1.90    2.10
   6 -17  -3    1.40    1.80
  -6 -17  -3    1.30    2.20
   6 -17   3    0.70    2.00
   6 -17   3    1.10    1.80
  -6 -18   3   17.40    2.70
   6 -18  -3   15.30    2.30
   6 -18  -3   13.60    2.60
  -6 -18  -3   17.10    2.70
   6 -18   3   18.00    2.50
   6 -18   3   17.80    2.40
   6 -19  -3    5.30    2.50
  -6 -19   3    5.60    2.60
   6 -19  -3    6.30    2.10
   6 -19   3    7.90    2.50
   6 -19   3    7.40    2.20
  -6 -19  -3    6.40    2.60
   6 -20  -3   11.40    2.90
  -6 -20   3   15.30    3.00
   6 -20  -3    8.50    2.30
  -6 -20  -3    5.80    2.80
   6 -20   3   12.30    2.60
   6 -20   3   13.00    2.30
  -6 -21   3   10.00    3.00
   6 -21  -3   11.10    3.10
   6 -21  -3   10.70    2.40
   6 -21   3   10.40    2.50
   6 -21   3    7.20    2.80
  -6 -21  -3   10.80    3.10
   7   0  -3   -0.40    0.90
  -7   0  -3    2.30    0.50
  -7   0   3   -1.40    0.80
   7   0   3   -0.60    0.90
  -7   0  -3   -1.20    0.90
  -7  -1   3    4.80    0.90
  -7   1  -3    3.30    1.00
   7  -1  -3    6.80    1.00
   7   1   3    2.70    0.90
   7   1  -3    8.00    1.00
  -7  -1  -3    3.70    1.00
   7  -1   3    3.70    1.00
  -7  -1  -3    7.10    0.70
  -7   1   3    4.80    1.00
   7  -2  -3    8.70    1.10
  -7   2  -3    7.40    1.10
  -7  -2   3    9.30    1.00
   7   2   3    6.30    0.90
   7   2  -3    7.80    1.00
  -7   2   3    7.70    1.10
   7  -2   3    5.60    1.10
  -7  -2  -3    4.20    1.00
  -7  -2  -3    6.10    0.90
   7   3   3  248.98   11.80
  -7  -3   3  252.47   11.90
  -7   3  -3  256.17   11.90
   7  -3  -3  247.78   11.90
  -7  -3   3  247.08   12.10
  -7  -3  -3  223.58   11.80
  -7  -3  -3  248.78   11.80
   7  -3   3  250.67   11.90
   7   3  -3  255.97   11.80
  -7   3   3  251.17   11.90
  -7  -4   3   17.80    1.60
  -7   4  -3   18.10    1.60
   7   4   3   16.00    1.30
  -7  -4   3   21.40    1.60
  -7  -4   3   14.10    1.30
   7  -4  -3   17.30    1.50
  -7  -4  -3   13.40    1.30
   7  -4   3   17.10    1.50
  -7  -4  -3   20.00    1.50
  -7   4   3   17.00    1.50
  -7  -4  -3   15.20    1.40
   7   4  -3   19.60    1.40
   7   5   3   27.50    1.70
  -7   5  -3   33.50    2.30
  -7  -5   3   33.60    2.10
  -7  -5   3   28.20    1.90
   7  -5  -3   32.50    2.20
  -7  -5  -3   32.60    2.10
   7   5  -3   30.80    1.90
  -7   5   3   34.00    2.30
  -7  -5  -3   27.70    1.90
   7  -5   3   27.10    2.20
   7  -6  -3    6.20    1.20
  -7  -6   3    5.40    1.00
  -7   6  -3    6.10    1.30
  -7  -6   3    6.10    0.80
  -7   6   3    9.60    1.30
   7  -6   3    5.60    1.20
   7   6  -3    6.70    0.90
  -7  -6  -3    2.30    0.80
  -7  -6  -3    6.10    1.20
   7  -7  -3   72.19    3.90
  -7   7  -3   66.29    3.90
  -7  -7   3   73.79    3.80
  -7  -7   3   72.19    3.70
  -7  -7  -3   71.89    3.90
   7  -7   3   70.19    3.90
   7   7  -3   68.59    3.50
  -7   7   3   66.79    3.90
   7  -8  -3   13.50    1.50
  -7   8  -3   13.20    1.50
  -7  -8   3   13.60    1.60
  -7  -8   3   17.20    1.50
  -7   8   3   13.60    1.50
   7  -8   3   13.40    1.50
  -7  -8  -3   15.80    1.60
  -7   9  -3   15.30    1.60
  -7  -9   3   20.00    1.60
   7  -9  -3   13.60    1.60
   7  -9   3   13.20    1.30
   7  -9   3   12.50    1.60
  -7   9   3   13.10    1.50
  -7  -9  -3   12.80    1.60
   7 -10  -3    1.90    1.30
  -7  10  -3    3.20    1.30
  -7 -10   3    2.20    0.70
  -7 -10   3    4.60    1.40
  -7 -10   3    1.50    1.00
   7 -10   3    1.50    1.30
  -7 -10  -3    1.50    1.40
  -7  10   3    1.30    1.20
   7 -10   3    1.40    1.00
   7 -11  -3    8.00    1.50
  -7 -11   3    8.00    1.20
  -7 -11   3    9.90    1.60
  -7  11  -3    8.00    1.50
   7 -11  -3   11.30    1.60
   7 -11   3    8.90    1.40
  -7 -11  -3    6.70    1.60
  -7  11   3    9.60    1.50
   7 -11   3    6.70    1.50
   7 -12  -3   26.90    2.20
  -7 -12   3   25.10    2.00
   7 -12  -3   25.30    2.10
  -7 -12   3   23.70    2.20
  -7  12  -3   20.60    2.10
   7 -12   3   20.90    2.10
  -7  12   3   22.80    2.00
  -7 -12  -3   20.60    2.20
   7 -12   3   25.50    2.30
   7 -13  -3   28.40    2.30
  -7 -13   3   25.90    2.40
  -7  13  -3   23.90    2.30
   7 -13  -3   30.00    2.40
   7 -13   3   23.70    2.30
   7 -13   3   26.50    2.20
  -7 -13  -3   25.30    2.40
  -7 -14   3   21.80    2.30
   7 -14  -3   20.90    2.20
   7 -14  -3   20.40    2.20
   7 -14   3   17.20    2.10
  -7 -14  -3   15.10    2.20
   7 -14   3   19.40    2.00
   7 -15  -3    5.00    1.90
  -7 -15   3    2.50    1.90
   7 -15  -3    5.50    1.80
  -7 -15  -3    5.20    2.00
   7 -15   3    4.50    1.80
   7 -15   3    7.10    1.80
   7 -16  -3   33.00    2.90
   7 -16  -3   33.00    2.70
  -7 -16   3   27.70    2.90
   7 -16   3   32.00    2.80
  -7 -16  -3   29.10    2.90
   7 -16   3   24.80    2.60
  -7 -17   3   16.10    2.60
   7 -17  -3   14.90    2.50
   7 -17  -3   17.30    2.30
   7 -17   3   15.90    2.30
  -7 -17  -3   18.20    2.60
   7 -17   3   16.70    2.40
   7 -18  -3    6.50    2.10
  -7 -18   3    4.20    2.30
   7 -18  -3    4.70    2.30
   7 -18   3    3.50    2.00
   7 -18   3    5.70    2.20
  -7 -18  -3    2.60    2.40
   7 -19  -3   -2.00    2.40
  -7 -19   3    2.50    2.50
   7 -19  -3    4.20    2.10
   7 -19   3    4.10    2.30
  -7 -19  -3    4.80    2.50
   7 -19   3    5.80    2.20
   7 -20  -3    6.10    2.90
  -7 -20   3    6.40    2.80
   7 -20  -3    5.80    2.20
   7 -20   3    8.80    2.40
  -7 -20  -3    6.10    2.80
   7 -20   3    3.30    2.50
   7 -21  -3    1.20    2.30
  -7 -21   3   -6.10    2.70
   7 -21  -3    3.40    2.90
  -7 -21  -3    6.50    2.90
   7 -21   3    4.80    2.40
  -8   0   3    7.10    1.10
  -8   0  -3    5.10    1.10
   8   0   3    4.90    1.00
  -8   0  -3    9.30    0.80
   8   0  -3    5.50    1.10
   8  -1  -3   11.60    1.30
  -8  -1   3    8.80    1.10
  -8   1  -3    9.20    1.20
   8   1   3    8.50    1.10
   8  -1   3    7.40    1.10
  -8   1   3    8.80    1.20
  -8  -1  -3    9.00    1.20
   8   1  -3    9.60    1.10
  -8  -1  -3   10.80    1.00
   8  -2  -3    5.70    1.20
   8   2   3    8.70    1.00
  -8  -2   3    8.40    1.10
  -8  -2   3    9.20    1.00
  -8   2  -3    7.30    1.20
   8   2  -3    6.90    1.00
  -8  -2  -3    6.20    1.10
   8  -2   3    5.80    1.10
  -8   2   3    6.70    1.10
  -8   3  -3   66.99    3.50
   8   3   3   57.69    3.20
   8  -3  -3   59.49    3.40
  -8  -3   3   62.89    3.30
  -8  -3  -3   59.49    3.30
  -8  -3  -3   51.89    3.10
  -8   3   3   59.19    3.40
   8   3  -3   63.49    3.30
   8  -3   3   61.09    3.40
   8   4   3   44.00    2.50
  -8  -4   3   48.50    2.70
   8  -4  -3   47.00    2.80
  -8   4  -3   46.70    2.90
  -8   4   3   44.50    2.80
  -8  -4  -3   40.70    2.50
  -8  -4  -3   41.80    2.60
   8   4  -3   47.30    2.60
   8  -4   3   42.20    2.80
  -8  -5   3   15.90    1.50
  -8  -5   3   19.90    1.50
   8   5   3   17.60    1.40
   8  -5  -3   17.60    1.60
  -8  -5   3   19.90    1.60
  -8   5  -3   16.50    1.70
   8   5  -3   16.70    1.50
  -8  -5  -3   19.90    1.50
   8  -5   3   16.90    1.70
  -8   5   3   18.60    1.70
  -8  -5  -3   14.40    1.20
  -8  -5  -3   14.10    1.30
  -8  -6   3  252.97   14.20
   8  -6  -3  305.17   14.40
  -8   6  -3  302.07   14.40
  -8  -6   3  313.57   14.30
  -8   6   3  313.07   14.40
  -8  -6  -3  317.17   14.20
  -8  -6  -3  304.37   14.00
   8  -6   3  293.87   14.40
   8   6  -3  288.27   14.20
  -8   7  -3    2.50    1.30
  -8  -7   3    2.30    1.00
   8  -7  -3    2.20    1.20
  -8  -7   3    0.80    0.70
  -8  -7  -3    2.30    1.20
   8  -7   3    2.40    1.20
  -8  -7  -3    1.60    0.70
   8   7  -3    2.70    0.80
  -8   7   3    2.70    1.20
  -8  -7  -3    2.70    0.80
  -8  -8   3  178.58    8.30
   8  -8  -3  169.58    8.40
  -8   8  -3  174.08    8.50
  -8  -8  -3  162.48    8.20
   8  -8   3  172.48    8.50
   8   8  -3  165.18    8.10
  -8   8   3  164.58    8.40
   8  -9  -3    3.30    1.40
  -8   9  -3    4.90    1.40
  -8  -9   3    5.80    1.10
  -8  -9   3    4.70    1.40
   8  -9   3    4.10    1.40
  -8  -9  -3    6.20    1.40
  -8   9   3    3.70    1.40
  -8  10  -3   72.29    4.20
   8 -10  -3   71.69    4.20
  -8 -10   3   76.59    3.90
  -8 -10   3   70.59    4.20
  -8  10   3   73.39    4.20
  -8 -10  -3   68.79    4.20
   8 -10   3   69.39    4.20
   8 -10   3   74.29    3.90
  -8 -11   3    4.50    1.60
  -8  11  -3    5.30    1.60
   8 -11  -3    7.20    1.60
  -8 -11   3    8.00    1.20
  -8  11   3    6.00    1.50
   8 -11   3    8.40    1.30
   8 -11   3    5.20    1.50
  -8 -11  -3    5.80    1.60
  -8  12  -3   20.30    2.10
  -8 -12   3   16.20    2.10
  -8 -12   3   22.70    1.70
   8 -12  -3   22.50    2.10
   8 -12  -3   21.20    2.10
   8 -12   3   20.00    1.90
   8 -12   3   17.50    2.10
  -8 -12  -3   19.10    2.10
  -8  12   3   23.30    2.10
  -8 -13   3   19.70    2.30
  -8  13  -3   16.10    2.10
   8 -13  -3   21.50    2.20
  -8 -13   3   18.30    1.70
   8 -13  -3   19.20    2.10
   8 -13   3   20.10    1.90
   8 -13   3   18.80    2.10
  -8 -13  -3   14.90    2.10
   8 -14  -3    9.40    2.00
   8 -14  -3    6.60    1.90
  -8 -14   3    8.30    2.10
  -8 -14  -3    5.60    1.90
   8 -14   3    6.90    1.70
   8 -14   3    6.40    1.90
   8 -15  -3   13.50    2.10
  -8 -15   3   10.10    2.20
   8 -15  -3   12.20    2.10
   8 -15   3   14.80    2.00
   8 -15   3    9.60    2.10
  -8 -15  -3   10.80    2.10
   8 -16  -3    3.20    1.90
  -8 -16   3    6.20    2.20
   8 -16  -3    1.50    2.00
   8 -16   3    0.30    1.90
   8 -16   3   -1.50    1.80
  -8 -16  -3    1.10    2.00
   8 -17  -3   17.20    2.50
  -8 -17   3   15.30    2.60
   8 -17  -3   17.70    2.40
  -8 -17  -3   13.30    2.50
   8 -17   3   13.90    2.30
   8 -17   3   10.80    2.30
  -8 -18   3    5.40    2.50
   8 -18  -3    6.10    2.30
   8 -18  -3    2.30    2.10
  -8 -18  -3   -2.30    2.40
   8 -18   3    1.60    2.10
   8 -18   3    4.90    2.20
   8 -19  -3    3.50    2.40
   8 -19  -3    4.20    2.30
  -8 -19   3    5.10    2.60
   8 -19   3    5.70    2.30
  -8 -19  -3    5.20    2.70
   8 -19   3    5.20    2.30
   8 -20  -3    6.60    2.70
   8 -20  -3    8.90    2.40
  -8 -20   3    5.50    2.80
  -8 -20  -3    4.40    2.90
   8 -20   3    4.50    2.50
   8 -20   3    8.80    2.50
   8 -21  -3    1.70    2.90
  -8 -21   3    3.30    3.00
  -8 -21  -3    2.70    3.00
   9   0   3  112.69    5.70
  -9   1  -3    2.80    1.20
   9   1   3    1.00    1.00
   9  -1  -3    2.60    1.10
  -9  -1   3    3.50    1.10
   9  -1   3    2.20    1.10
   9   1  -3    2.90    1.10
  -9   1   3    2.50    1.20
  -9  -1  -3    3.10    1.10
  -9  -1  -3    1.10    0.70
   9   2   3    8.30    1.20
  -9  -2   3    8.00    1.30
  -9   2  -3    7.90    1.40
  -9  -2   3   11.70    1.20
   9  -2  -3   11.20    1.40
  -9   2   3   10.70    1.40
   9   2  -3   11.20    1.30
   9  -2   3    8.90    1.30
  -9  -2  -3    7.40    1.30
   9  -3  -3    3.00    1.20
  -9  -3   3    2.80    1.10
   9   3   3   -1.30    0.90
  -9   3  -3    1.40    1.30
  -9  -3   3    2.30    1.00
   9  -3   3   -0.30    1.20
   9   3  -3    2.30    1.00
  -9  -3  -3   -0.70    1.10
  -9   3   3    2.70    1.20
   9   4   3  145.49    7.80
  -9   4  -3  162.68    8.10
   9  -4  -3  169.28    8.00
  -9  -4   3  179.58    8.10
  -9  -4   3  146.89    7.90
  -9  -4  -3  151.88    7.90
   9  -4   3  165.88    8.00
  -9   4   3  165.68    8.00
   9   4  -3  163.38    7.90
   9  -5  -3   82.89    4.20
  -9   5  -3   76.49    4.30
   9   5   3   71.19    3.80
  -9  -5   3   74.69    4.10
   9  -5   3   72.99    4.20
   9   5  -3   80.19    3.90
  -9  -5  -3   61.49    3.80
  -9  -5  -3   70.39    3.90
  -9   5   3   87.29    4.20
  -9   6  -3   67.69    4.00
  -9  -6   3   55.59    3.50
  -9  -6   3   74.89    3.70
   9  -6  -3   75.19    3.90
   9   6   3   62.89    3.40
  -9  -6  -3   63.19    3.60
   9   6  -3   65.79    3.50
  -9   6   3   75.99    3.90
   9  -6   3   67.09    3.90
  -9  -6  -3   72.79    3.70
  -9  -7   3   23.80    2.00
  -9   7  -3   22.90    2.00
   9  -7  -3   24.60    2.00
  -9  -7   3   20.20    1.70
  -9   7   3   25.80    2.00
   9  -7   3   21.70    2.00
  -9  -7  -3   27.30    2.00
  -9  -7  -3   21.80    1.80
   9   7  -3   19.80    1.70
  -9  -8   3  130.89    6.10
   9  -8  -3  130.29    6.30
  -9   8  -3  124.19    6.30
  -9  -8  -3  123.49    6.10
  -9  -8  -3   97.69    5.80
  -9  -8  -3  115.99    5.90
  -9   8   3  115.19    6.20
   9  -8   3  129.59    6.30
   9   8  -3  122.79    5.90
  -9   9  -3   26.80    2.60
   9  -9  -3   33.50    2.70
  -9  -9   3   31.40    2.30
   9  -9   3   30.90    2.70
  -9   9   3   34.50    2.70
  -9  -9  -3   29.90    2.60
  -9 -10   3   37.90    2.40
  -9 -10   3   31.20    2.80
   9 -10  -3   32.10    2.80
  -9  10  -3   32.50    2.80
  -9  10   3   33.80    2.70
  -9 -10  -3   30.10    2.80
   9 -10   3   36.10    3.00
   9 -11  -3    2.10    1.50
  -9 -11   3    1.80    1.70
  -9  11  -3    3.30    1.60
  -9 -11   3    3.80    1.20
   9 -11   3    4.30    1.60
  -9 -11  -3    1.20    1.60
  -9  11   3    3.90    1.50
   9 -11   3    2.00    1.30
  -9  12  -3   31.00    2.60
  -9 -12   3   32.70    2.80
  -9 -12   3   34.20    2.50
   9 -12  -3   31.50    3.00
   9 -12   3   37.70    2.60
   9 -12   3   34.60    3.00
  -9 -12  -3   28.60    2.60
  -9  12   3   30.30    2.90
   9 -13  -3   11.70    2.00
  -9 -13   3   12.30    1.50
   9 -13  -3   15.30    2.10
  -9  13  -3    9.30    2.00
  -9 -13   3   13.00    2.20
   9 -13   3   12.10    2.00
  -9 -13  -3    9.00    2.00
   9 -13   3   11.10    1.70
   9 -14  -3    7.70    1.90
  -9 -14   3    5.80    2.10
   9 -14  -3    6.50    1.90
   9 -14   3    7.60    1.90
   9 -14   3   10.00    1.80
  -9 -14  -3    6.80    2.00
  -9 -15   3    9.00    2.20
   9 -15  -3    7.60    2.00
   9 -15  -3    9.90    2.10
   9 -15   3    7.50    2.10
   9 -15   3    9.20    1.90
  -9 -15  -3    9.20    2.20
  -9 -16   3    5.20    2.20
   9 -16  -3    6.60    2.10
   9 -16  -3    5.70    2.10
   9 -16   3    8.60    1.90
   9 -16   3    6.10    2.10
  -9 -16  -3    7.20    2.20
   9 -17  -3   14.10    2.50
   9 -17  -3   12.20    2.20
  -9 -17   3   17.90    2.70
  -9 -17  -3   10.50    2.50
   9 -17   3   13.40    2.30
   9 -17   3   12.60    2.40
  -9 -18   3    5.90    2.50
   9 -18  -3    4.60    2.20
   9 -18  -3    4.50    2.40
  -9 -18  -3    6.20    2.40
   9 -18   3    3.50    2.20
   9 -18   3    5.00    2.30
   9 -19  -3    3.80    2.50
   9 -19  -3    3.40    2.20
  -9 -19   3   -1.00    2.50
   9 -19   3    6.20    2.40
   9 -19   3    3.70    2.40
  -9 -19  -3    8.00    2.70
   9 -20  -3    3.20    2.40
   9 -20  -3   -2.70    2.60
  -9 -20   3   -0.70    2.80
   9 -20   3    0.30    2.40
   9 -20   3   -2.70    2.50
  -9 -20  -3    4.10    2.80
  10   0  -3    4.90    1.20
 -10   0   3    4.30    1.30
  10   0   3    5.30    1.20
 -10   0  -3    4.20    1.30
 -10  -1   3    1.40    1.10
  10   1   3   -1.30    1.10
 -10   1  -3   -1.20    1.20
  10  -1  -3    1.00    1.20
 -10  -1  -3    0.20    1.20
 -10  -1  -3   -0.60    0.70
 -10   1   3   -0.30    1.20
  10  -1   3   -0.40    1.10
  10   1  -3    1.30    1.10
  10   2   3   10.20    1.30
 -10   2  -3   12.10    1.60
 -10  -2   3   11.80    1.40
  10  -2  -3   11.60    1.50
 -10  -2   3   14.30    1.40
 -10   2   3   12.80    1.50
 -10  -2  -3   10.70    1.50
  10  -2   3   11.60    1.50
  10   2  -3   12.60    1.40
  10  -3  -3   41.90    2.80
 -10   3  -3   40.80    2.90
  10   3   3   39.20    2.50
 -10  -3   3   43.10    2.70
 -10  -3   3   40.70    2.60
  10  -3   3   42.70    2.80
  10   3  -3   39.10    2.60
 -10  -3  -3   37.80    2.70
 -10   3   3   41.50    2.80
 -10   4  -3   10.70    1.50
  10   4   3   10.20    1.20
 -10  -4   3    7.40    1.30
 -10  -4   3   14.20    1.40
  10  -4  -3   12.50    1.50
 -10   4   3   12.40    1.50
  10   4  -3   10.50    1.30
 -10  -4  -3    6.70    1.30
  10  -4   3   10.80    1.50
 -10  -5   3  523.75   26.60
 -10   5  -3  535.85   26.10
  10  -5  -3  556.94   26.10
 -10  -5   3  575.04   26.00
  10   5   3  557.14   25.90
  10  -5   3  535.15   26.10
 -10  -5  -3  564.54   26.00
  10   5  -3  550.84   26.00
 -10   5   3  540.65   26.10
  10  -6  -3   44.90    2.90
  10   6   3   40.40    2.40
 -10   6  -3   42.30    3.00
  10  -6   3   39.00    2.90
 -10  -6  -3   35.00    2.40
 -10   6   3   42.80    3.00
 -10  -6  -3   43.60    2.60
  10   6  -3   43.00    2.50
  10  -7  -3  252.27   11.90
  10   7   3  235.88   11.60
 -10   7  -3  245.58   12.00
  10   7  -3  232.78   11.70
 -10  -7  -3  255.57   11.70
  10  -7   3  242.18   11.90
 -10   7   3  249.88   11.90
 -10  -7  -3  236.78   11.60
  10  -8  -3   30.40    2.70
 -10   8  -3   33.40    2.70
 -10  -8  -3   31.00    2.20
  10  -8   3   29.40    2.70
  10   8  -3   30.60    2.00
 -10  -8  -3   32.50    2.60
 -10   8   3   28.50    2.60
 -10   9  -3  133.49    7.30
 -10  -9   3  148.89    7.10
  10  -9  -3  145.09    7.30
 -10   9   3  134.99    7.30
 -10  -9  -3  131.99    7.10
 -10  -9  -3  149.39    7.00
  10  -9   3  140.89    7.30
 -10  10  -3   23.20    2.30
  10 -10  -3   28.00    2.30
 -10 -10   3   23.10    1.90
  10 -10   3   20.30    2.20
 -10  10   3   22.80    2.20
 -10 -10  -3   22.30    2.20
  10 -11  -3   40.80    3.20
 -10  11  -3   45.20    3.40
 -10 -11   3   41.60    2.90
  10 -11   3   35.90    2.80
 -10  11   3   40.10    3.30
 -10 -11  -3   40.10    3.20
  10 -11   3   36.90    3.30
 -10  12  -3    8.10    1.90
  10 -12  -3    4.10    1.80
 -10 -12   3    4.40    1.50
 -10 -12   3    3.10    1.80
 -10  12   3    4.80    1.80
  10 -12   3    5.40    1.50
  10 -12   3    5.20    1.80
 -10 -12  -3    2.80    1.80
 -10 -13   3   40.40    2.80
 -10 -13   3   40.90    3.40
 -10  13  -3   38.20    3.40
  10 -13  -3   36.20    3.30
  10 -13  -3   38.90    3.30
  10 -13   3   37.10    3.40
  10 -13   3   36.60    3.00
 -10 -13  -3   37.70    3.30
  10 -14  -3    4.90    2.00
 -10 -14   3    6.30    2.10
  10 -14  -3    5.30    1.90
 -10 -14  -3    2.60    2.00
  10 -14   3    4.90    2.00
  10 -14   3    6.30    1.70
 -10 -15   3   20.50    2.60
  10 -15  -3   18.30    2.40
  10 -15  -3   19.50    2.50
  10 -15   3   22.90    2.30
 -10 -15  -3   15.80    2.50
  10 -15   3   16.00    2.50
  10 -16  -3    8.60    2.20
  10 -16  -3   15.50    2.40
 -10 -16   3    6.80    2.50
  10 -16   3   12.00    2.40
 -10 -16  -3   11.40    2.40
  10 -16   3   14.50    2.20
  10 -17  -3    5.70    2.20
  10 -17  -3    3.90    2.30
 -10 -17   3    5.20    2.50
 -10 -17  -3    4.60    2.40
  10 -17   3    4.40    2.10
  10 -17   3    4.10    2.30
  10 -18  -3    2.80    2.40
 -10 -18   3    2.80    2.50
  10 -18  -3    6.20    2.30
 -10 -18  -3    4.10    2.40
  10 -18   3    6.10    2.30
  10 -18   3    5.40    2.40
  10 -19  -3    1.80    2.40
  10 -19  -3    2.20    2.50
 -10 -19   3    0.90    2.70
 -10 -19  -3    3.30    2.50
  10 -19   3    2.00    2.40
  10 -19   3   -1.30    2.40
  10 -20  -3    1.00    2.70
 -10 -20   3    4.30    2.90
  10 -20  -3   -1.20    2.60
  10 -20   3    2.50    2.70
  10 -20   3    5.50    2.50
 -10 -20  -3    4.30    2.80
 -11   0  -3    9.10    1.40
  11   0   3    9.10    1.40
 -11   0  -3    8.00    0.90
 -11   0   3    9.50    1.40
  11   0  -3    9.90    1.40
  11   1   3    4.70    1.20
  11  -1  -3    6.90    1.30
 -11  -1   3    4.60    1.30
 -11   1  -3    8.00    1.40
 -11  -1   3    5.70    1.20
 -11  -1  -3    5.70    1.30
  11   1  -3    7.10    1.30
  11  -1   3    2.30    1.30
 -11   1   3    6.50    1.40
 -11  -1  -3    4.30    0.90
 -11  -2   3    0.60    1.20
 -11  -2   3    0.70    1.00
  11  -2  -3    0.10    1.30
 -11   2  -3    3.00    1.30
  11   2   3    0.30    1.10
  11   2  -3    0.80    1.10
  11  -2   3    0.30    1.20
 -11   2   3    3.70    1.40
 -11  -2  -3   -0.60    1.20
  11   3   3    6.70    1.20
  11  -3  -3    6.60    1.40
 -11   3  -3    8.00    1.50
 -11  -3   3    7.50    1.40
 -11  -3   3    7.80    1.30
 -11   3   3    8.60    1.50
 -11  -3  -3    8.10    1.40
  11  -3   3    7.00    1.40
  11   3  -3    9.60    1.30
 -11   4  -3   13.20    1.70
  11   4   3   12.10    1.40
  11  -4  -3   16.20    1.70
 -11  -4   3   12.80    1.50
  11  -4   3   12.70    1.70
 -11   4   3   14.20    1.70
  11   4  -3   23.50    1.80
 -11  -4  -3   11.50    1.50
  11   5   3   77.09    4.30
 -11  -5   3   83.59    4.60
  11  -5  -3   86.29    4.70
 -11   5  -3   83.59    4.80
 -11  -5   3   83.89    4.60
  11  -5   3   84.49    4.70
 -11  -5  -3   82.99    4.50
 -11   5   3   90.49    4.70
  11   5  -3   80.59    4.40
  11  -6  -3   22.20    2.00
 -11  -6   3   20.90    1.80
  11   6   3   20.80    1.70
 -11   6  -3   24.20    2.20
 -11   6   3   24.20    2.10
 -11  -6  -3   21.80    1.80
  11  -6   3   20.20    2.10
  11   6  -3   23.80    1.90
 -11  -6  -3   16.70    1.50
 -11   7  -3   54.69    3.70
  11   7   3   55.09    3.00
  11  -7  -3   53.99    3.60
 -11  -7   3   54.89    3.30
  11   7  -3   50.89    3.10
 -11  -7  -3   59.89    3.30
  11  -7   3   53.49    3.60
 -11   7   3   50.99    3.60
 -11  -8   3   10.60    1.40
  11  -8  -3   13.50    1.80
 -11   8  -3   10.20    1.80
 -11   8   3   10.80    1.80
 -11  -8  -3    9.10    1.40
  11   8  -3   11.70    1.20
  11  -8   3    9.60    1.80
  11  -9  -3   55.59    3.70
 -11   9  -3   49.00    3.70
 -11  -9  -3   56.59    3.20
 -11  -9  -3   54.59    3.60
  11  -9   3   56.89    3.80
 -11   9   3   47.00    3.60
 -11  10  -3    2.40    1.70
  11 -10  -3    2.40    1.70
 -11  10   3    1.20    1.70
 -11 -10  -3    1.00    1.20
  11 -10   3    2.10    1.70
 -11 -10  -3    1.50    1.60
  11 -11  -3   27.40    2.60
 -11  11  -3   32.20    2.70
 -11  11   3   26.50    2.60
 -11 -11  -3   28.80    2.60
  11 -11   3   31.30    2.70
  11 -12  -3    4.50    1.90
 -11  12  -3    1.60    1.90
  11 -12   3    2.40    1.90
 -11 -12  -3    0.60    1.80
 -11  12   3    2.80    1.90
  11 -12   3    4.90    1.50
  11 -13  -3    5.10    1.90
 -11  13  -3    8.10    2.00
 -11 -13  -3    5.70    2.00
  11 -13   3    6.60    1.60
  11 -13   3    5.90    2.00
  11 -14  -3    2.30    1.90
  11 -14  -3    5.10    2.10
  11 -14   3    3.20    1.60
  11 -14   3    3.50    2.00
 -11 -14  -3    4.20    2.10
  11 -15  -3    8.10    2.10
 -11 -15   3   10.80    2.20
  11 -15  -3    8.00    2.20
 -11 -15  -3    8.30    2.30
  11 -15   3    9.10    2.30
  11 -15   3    9.00    1.90
 -11 -16   3    6.50    2.30
  11 -16  -3    8.60    2.30
  11 -16  -3    9.20    2.30
 -11 -16  -3    9.60    2.50
  11 -16   3    7.00    2.30
  11 -16   3    7.90    2.10
  11 -17  -3    3.20    2.20
 -11 -17   3    0.20    2.30
  11 -17  -3    3.30    2.20
  11 -17   3    0.30    2.30
  11 -17   3    2.60    2.00
 -11 -17  -3    4.50    2.40
  11 -18  -3    3.10    2.50
  11 -18  -3    7.40    2.40
 -11 -18   3    5.10    2.70
 -11 -18  -3    2.90    2.70
  11 -18   3    3.20    2.40
  11 -18   3    7.40    2.30
 -11 -19   3    3.50    2.70
  11 -19  -3    0.50    2.50
  11 -19  -3   -0.50    2.50
  11 -19   3    3.70    2.50
 -11 -19  -3    3.40    2.70
  11 -19   3    1.10    2.40
  12   0  -3   -0.60    1.30
 -12   0  -3    0.00    1.30
 -12   0   3   -1.20    1.30
  12   0   3    1.30    1.20
 -12   0  -3    0.60    0.80
 -12  -1   3    3.60    1.10
 -12  -1   3    2.80    1.40
  12  -1  -3    2.50    1.40
 -12   1  -3    4.30    0.80
  12   1   3    3.80    1.20
 -12   1  -3    6.00    1.50
 -12   1   3   -0.80    1.30
 -12  -1  -3    5.90    0.90
 -12  -1  -3    3.80    1.40
  12   1  -3    2.80    1.30
  12  -1   3    5.00    1.30
 -12  -2   3   28.20    2.20
  12  -2  -3   28.10    2.20
 -12   2  -3   29.00    2.30
 -12  -2   3   30.90    2.50
  12   2   3   24.40    2.30
  12   2  -3   25.30    2.30
 -12  -2  -3   26.20    2.40
 -12   2   3   30.80    2.30
  12  -2   3   25.20    2.40
 -12  -3   3   15.60    1.60
 -12   3  -3   15.10    1.80
  12   3   3   16.70    1.60
 -12  -3   3   15.20    1.70
  12  -3  -3   14.80    1.80
  12   3  -3   13.10    1.60
 -12   3   3   14.80    1.80
  12  -3   3   17.30    1.80
 -12  -3  -3   17.30    1.80
 -12  -4   3  183.18    9.30
  12   4   3  184.18    9.00
 -12   4  -3  182.38    9.30
  12  -4  -3  191.58    9.30
 -12  -4   3  189.88    9.20
  12   4  -3  184.18    9.10
  12  -4   3  186.18    9.20
 -12   4   3  186.28    9.30
 -12  -4  -3  176.58    9.10
 -12  -5   3    4.10    1.40
  12   5   3    4.50    1.10
 -12  -5   3    4.80    1.40
  12  -5  -3    5.20    1.60
 -12   5  -3    7.40    1.70
  12  -5   3    6.50    1.60
 -12  -5  -3    2.80    1.30
  12   5  -3    4.60    1.20
 -12   5   3    1.80    1.60
  12  -6  -3  158.18    7.90
 -12   6  -3  149.59    7.80
 -12  -6   3  157.28    7.70
  12   6   3  150.58    7.50
 -12  -6  -3  158.68    7.60
  12  -6   3  155.08    7.80
  12   6  -3  139.89    7.50
 -12   6   3  150.38    7.90
  12  -7  -3   33.40    2.60
 -12  -7   3   27.30    2.50
 -12   7  -3   30.60    2.60
 -12   7   3   34.00    2.60
 -12  -7  -3   26.80    2.50
  12  -7   3   33.40    2.90
  12   7  -3   28.80    2.20
  12  -8  -3   66.59    4.30
 -12   8  -3   62.79    4.30
 -12  -8   3   69.39    4.00
 -12  -8  -3   72.09    3.90
 -12   8   3   68.59    4.30
  12  -8   3   68.79    4.30
 -12   9  -3   14.30    2.00
 -12  -9   3   12.70    1.70
  12  -9  -3   13.30    2.00
 -12  -9  -3   12.10    1.50
 -12   9   3   11.50    2.00
  12  -9   3   11.30    2.00
  12 -10  -3   13.40    2.20
 -12 -10   3   15.30    1.80
 -12  10  -3   15.80    2.20
  12 -10   3   15.10    2.10
 -12  10   3   12.90    2.10
 -12 -10  -3   16.40    1.70
 -12  11  -3    2.40    1.90
 -12 -11   3    1.90    1.50
  12 -11  -3    2.60    1.90
 -12 -11  -3    2.60    1.80
 -12  11   3    1.00    1.80
  12 -11   3    1.60    1.90
 -12  12  -3   40.50    3.20
  12 -12  -3   37.50    3.50
 -12 -12   3   37.00    2.90
 -12 -12  -3   35.60    3.10
  12 -12   3   39.50    3.20
  12 -12   3   34.40    2.90
 -12  12   3   40.80    3.50
 -12 -13   3    1.20    1.40
 -12  13  -3   -1.30    2.00
  12 -13  -3   -1.00    1.90
 -12 -13  -3    1.20    2.00
  12 -13   3    2.70    1.60
  12 -13   3   -0.30    1.90
  12 -14  -3   23.30    2.60
 -12 -14   3   27.20    2.10
  12 -14  -3   24.00    2.70
 -12 -14  -3   22.90    2.70
  12 -14   3   22.20    2.70
  12 -14   3   22.80    2.30
  12 -15  -3    8.00    2.30
  12 -15  -3    5.20    2.10
  12 -15   3    5.60    2.20
  12 -15   3    3.10    1.70
 -12 -15  -3    4.80    2.30
  12 -16  -3   14.10    2.60
  12 -16  -3   14.40    2.40
 -12 -16  -3   11.40    2.60
  12 -16   3   10.90    2.50
  12 -16   3   10.70    2.10
  12 -17  -3   -1.00    2.30
  12 -17  -3    2.20    2.20
  12 -17   3    3.40    2.10
  12 -17   3    1.50    2.40
 -12 -17  -3    4.90    2.50
  12 -18  -3    4.00    2.40
  12 -18  -3   -0.40    2.40
  12 -18   3    1.40    2.40
 -12 -18  -3   -0.60    2.60
  12 -18   3   -0.60    2.20
  12 -19  -3   -0.20    2.60
  12 -19  -3    1.00    2.50
 -12 -19  -3    2.50    2.80
  12 -19   3    3.40    2.70
  12 -19   3    8.10    2.60
  13   0   3    9.00    1.50
 -13   0   3    8.10    1.70
  13   0  -3    7.70    1.50
 -13   0  -3    9.00    1.10
  13  -1  -3   11.40    1.70
 -13   1  -3   11.10    1.70
 -13  -1   3   12.10    1.50
 -13   1  -3    8.10    1.10
 -13  -1   3   11.10    1.70
  13   1   3   10.70    1.50
 -13   1   3   11.20    1.70
 -13  -1  -3    7.20    1.60
 -13  -1  -3    8.40    1.10
  13  -1   3    8.50    1.50
  13   2   3    3.80    1.30
 -13  -2   3    2.10    1.30
 -13   2  -3    3.30    1.60
 -13  -2   3   -0.70    1.40
  13  -2  -3    2.30    1.40
 -13   2   3    0.00    1.50
  13  -2   3    1.40    1.40
 -13  -2  -3    0.30    1.40
  13   2  -3    2.70    1.30
  13   3   3   23.70    2.10
 -13   3  -3   18.60    2.10
 -13  -3   3   18.60    2.00
 -13  -3   3   20.90    1.80
  13  -3  -3   19.70    2.00
  13  -3   3   16.10    2.00
 -13   3   3   30.90    2.60
 -13  -3  -3   14.10    1.90
  13   3  -3   18.00    1.80
 -13  -4   3   19.90    2.20
 -13  -4   3   27.30    2.50
  13   4   3   28.50    2.30
  13  -4   3   36.50    2.80
 -13   4   3   32.40    2.90
 -13  -4  -3   30.60    2.60
  13   4  -3   36.90    2.50
  13   5   3   35.30    2.50
 -13  -5   3   35.90    2.90
 -13  -5   3   35.90    2.90
  13  -5  -3   41.90    3.20
 -13   5  -3   38.60    3.20
 -13   5   3   37.20    3.20
  13   5  -3   34.70    2.60
 -13  -5  -3   38.20    2.90
  13  -5   3   38.80    3.10
 -13   6  -3   71.89    4.60
 -13  -6   3   72.39    4.30
  13  -6  -3   81.99    4.60
  13   6   3   74.99    4.10
  13  -6   3   74.49    4.60
 -13  -6  -3   71.19    4.30
  13   6  -3   69.29    4.10
 -13   6   3   79.39    4.60
  13  -7  -3   33.70    3.10
 -13  -7   3   34.20    2.80
 -13   7  -3   33.40    2.80
  13  -7   3   33.70    2.80
 -13   7   3   35.20    2.90
 -13  -7  -3   34.10    2.80
 -13   8  -3   75.69    4.80
  13  -8  -3   79.99    4.80
 -13  -8   3   73.29    4.50
  13  -8   3   81.99    4.80
 -13   8   3   76.59    4.80
 -13  -8  -3   78.49    4.40
 -13   9  -3    8.40    2.00
  13  -9  -3    6.40    1.90
 -13  -9   3    4.30    1.60
  13  -9   3    5.10    1.90
 -13   9   3    6.00    1.90
 -13  -9  -3    9.70    1.60
  13 -10  -3   43.80    3.70
 -13  10  -3   38.80    3.60
 -13 -10   3   37.50    3.10
  13 -10   3   37.60    3.50
 -13  10   3   38.80    3.50
 -13 -10  -3   41.90    3.00
 -13  11  -3    1.30    2.00
  13 -11  -3    1.90    2.00
 -13 -11   3    3.40    1.60
 -13 -11  -3    1.30    1.50
  13 -11   3    0.40    2.00
 -13  11   3   -0.70    1.90
 -13 -12   3    8.90    1.80
 -13  12  -3   15.30    2.40
  13 -12  -3   10.70    2.30
  13 -12   3    8.30    2.20
 -13  12   3    7.20    2.10
 -13  13  -3    6.30    2.20
 -13 -13   3    0.80    1.60
  13 -13  -3   -0.80    2.10
 -13 -13  -3    1.30    2.10
  13 -13   3    2.20    1.70
  13 -13   3    2.10    2.10
 -13 -14   3   11.40    1.80
  13 -14  -3    8.40    2.30
  13 -14   3   12.00    2.00
 -13 -14  -3    8.40    2.30
  13 -14   3   13.60    2.50
  13 -15  -3   -0.70    2.20
  13 -15  -3   -4.00    2.00
  13 -15   3   -0.30    1.80
 -13 -15  -3   -1.00    2.30
  13 -15   3   -0.40    2.30
  13 -16  -3    2.60    2.30
  13 -16  -3    3.50    2.30
  13 -16   3    0.20    1.90
 -13 -16  -3    4.00    2.50
  13 -16   3    4.20    2.40
  13 -17  -3    3.00    2.40
  13 -17  -3    2.50    2.40
  13 -17   3    4.50    2.20
 -13 -17  -3    1.90    2.60
  13 -17   3    3.00    2.50
  13 -18  -3    0.50    2.40
  13 -18  -3    4.70    2.60
  13 -18   3    2.80    2.60
 -13 -18  -3    0.20    2.70
 -14   0  -3   19.40    1.60
 -14   0   3   13.60    2.00
  14   0   3   18.10    1.90
  14  -1  -3    9.60    1.70
 -14  -1   3   11.00    1.90
  14   1   3    9.00    1.60
 -14   1  -3    9.60    1.20
 -14   1  -3    8.60    1.80
 -14  -1   3    9.50    1.50
  14  -1   3   10.50    1.70
 -14  -1  -3    9.90    1.20
 -14  -1  -3    6.20    1.70
 -14   1   3   11.50    1.90
  14   1  -3    7.60    1.60
 -14  -2   3   16.30    1.80
 -14   2  -3   16.80    2.10
  14  -2  -3   13.90    1.90
 -14  -2   3   13.40    1.90
  14   2   3   15.90    1.70
  14   2  -3   14.70    1.80
  14  -2   3   16.80    1.90
 -14   2   3   16.70    2.10
 -14  -2  -3   15.20    1.90
  14  -3  -3   52.79    3.60
 -14   3  -3   52.09    3.70
 -14  -3   3   48.60    3.50
 -14  -3   3   46.90    3.30
  14   3   3   46.80    3.20
 -14   3   3   47.20    3.70
  14   3  -3   50.19    3.20
  14  -3   3   49.50    3.50
 -14  -3  -3   52.19    3.50
  14   4   3   26.70    2.10
 -14  -4   3   12.40    1.90
 -14   4  -3   17.30    2.10
 -14  -4   3   13.30    1.80
  14  -4  -3   17.60    2.10
  14   4  -3   16.80    1.80
 -14  -4  -3   15.30    1.90
 -14   4   3   12.30    2.10
 -14   5  -3   35.40    3.30
 -14  -5   3   36.80    3.00
  14   5   3   35.10    2.60
  14  -5  -3   35.50    2.90
 -14  -5   3   34.80    3.00
 -14   5   3   35.80    2.90
  14  -5   3   36.10    3.30
  14   5  -3   36.80    2.70
 -14  -5  -3   41.90    3.00
 -14   6  -3    7.40    2.00
  14  -6  -3    6.20    1.90
 -14  -6   3    3.70    1.70
 -14   6   3    1.50    1.90
 -14  -6  -3    6.60    1.60
  14  -6   3    6.10    1.90
  14  -7  -3   79.29    4.90
 -14   7  -3   72.79    4.90
 -14  -7   3   81.79    4.70
 -14   7   3   73.89    5.00
  14  -7   3   80.19    4.90
 -14  -7  -3   80.09    4.60
 -14  -8   3   12.70    1.90
 -14   8  -3   13.10    2.30
  14  -8  -3   12.10    2.20
 -14  -8  -3   11.70    1.80
 -14   8   3   13.40    2.30
  14  -8   3   13.60    2.20
  14  -9  -3   19.50    2.60
 -14   9  -3   18.70    2.60
 -14  -9   3   22.10    2.20
  14  -9   3   23.10    2.60
 -14  -9  -3   24.60    2.20
 -14   9   3   20.20    2.60
 -14 -10   3    0.50    1.70
  14 -10  -3   -0.60    2.00
 -14  10  -3    3.10    2.10
 -14  10   3   -2.40    2.00
  14 -10   3    1.70    2.00
 -14 -10  -3    2.60    1.60
  14 -11  -3   32.70    3.10
 -14  11  -3   30.90    3.00
 -14 -11   3   31.70    2.90
  14 -11   3   30.40    3.10
 -14 -11  -3   30.90    2.80
 -14  11   3   30.70    3.10
 -14 -12   3    0.20    1.60
  14 -12  -3    1.30    2.20
 -14  12  -3    2.80    2.20
  14 -12   3    1.30    2.10
 -14  12   3    0.70    2.10
 -14  13  -3   17.90    2.70
  14 -13  -3   11.80    2.50
 -14 -13   3   17.50    2.00
  14 -13   3   14.40    2.60
  14 -13   3   14.70    2.10
 -14 -14   3   -3.40    1.60
  14 -14  -3    1.70    2.30
  14 -14   3   -0.10    1.80
  14 -14   3   -0.60    2.30
  14 -15  -3    7.20    2.30
  14 -15  -3    3.50    2.40
  14 -15   3    7.90    2.60
  14 -15   3    6.60    2.00
  14 -16  -3   -0.70    2.30
  14 -16  -3    3.10    2.40
  14 -16   3    1.20    2.50
  14 -16   3    0.20    1.90
  14 -17  -3   -0.40    2.40
  14 -17  -3   -0.80    2.30
  14 -17   3    1.00    2.60
  14 -18  -3    1.10    2.60
  14 -18  -3    1.80    2.60
  14 -18   3    3.90    2.60
 -15   0  -3   13.60    1.50
  15   0  -3   17.60    2.00
 -15   0  -3   18.10    2.10
 -15   0   3   17.00    2.10
 -15   0   3   14.70    1.80
  15   1   3    1.30    1.50
 -15  -1   3    2.90    1.40
 -15   1  -3    3.00    1.80
 -15  -1   3    2.60    1.80
  15  -1  -3    3.40    1.70
 -15   1  -3    1.10    1.00
  15  -1   3    2.30    1.60
  15   1  -3    1.80    1.60
 -15   1   3    1.10    1.80
 -15  -1  -3    1.90    1.10
 -15  -1  -3    4.20    1.70
 -15  -2   3    3.40    1.50
 -15   2  -3    4.50    1.10
  15  -2  -3    4.10    1.80
 -15   2  -3    2.20    1.80
 -15  -2   3    3.80    1.80
  15   2   3    5.80    1.50
  15   2  -3    5.40    1.60
 -15  -2  -3    5.20    1.80
 -15   2   3    7.20    1.90
  15  -2   3    5.10    1.70
 -15  -3   3    5.80    1.60
  15  -3  -3    6.70    1.80
  15   3   3    4.80    1.40
 -15  -3   3    6.10    1.80
 -15   3  -3    4.20    1.90
  15   3  -3    5.00    1.60
  15  -3   3    4.90    1.80
 -15  -3  -3    3.70    1.70
 -15   3   3    5.20    2.00
 -15  -4   3    8.50    1.90
  15  -4  -3   14.30    2.10
 -15   4  -3    9.80    2.10
 -15  -4   3   12.80    1.80
  15   4   3   12.00    1.60
  15  -4   3   12.70    2.00
  15   4  -3   10.40    1.70
 -15   4   3   13.40    2.20
 -15  -4  -3    7.30    1.90
  15  -5  -3   25.90    2.60
 -15   5  -3   22.00    2.60
 -15  -5   3   21.30    2.40
 -15  -5   3   25.50    2.40
 -15  -5  -3   25.70    2.40
  15  -5   3   21.70    2.40
 -15   5   3   22.20    2.60
 -15   6  -3   13.80    2.30
  15  -6  -3    5.50    2.10
 -15  -6   3    8.90    2.00
 -15  -6  -3    8.70    1.90
 -15   6   3    8.50    2.20
  15  -6   3    9.00    2.10
 -15   7  -3   47.20    4.00
  15  -7  -3   49.90    3.90
 -15  -7   3   42.60    3.60
  15  -7   3   46.10    3.90
 -15  -7  -3   49.70    3.60
 -15   7   3   42.80    3.90
 -15   8  -3    2.00    2.10
 -15  -8   3    3.90    1.90
  15  -8  -3    4.00    2.10
  15  -8   3    4.20    2.00
 -15   8   3    0.40    2.10
 -15  -8  -3    1.40    1.70
 -15  -9   3   34.50    3.20
  15  -9  -3   36.10    3.30
 -15   9  -3   33.70    3.20
 -15   9   3   35.40    3.20
 -15  -9  -3   33.00    2.70
  15  -9   3   37.10    3.10
 -15 -10   3    5.50    1.90
 -15  10  -3    0.10    2.20
  15 -10  -3    2.90    2.20
 -15 -10  -3    2.20    1.70
 -15  10   3    1.70    2.20
  15 -10   3    1.80    2.10
 -15 -11   3   20.10    2.40
  15 -11  -3   25.10    2.80
 -15  11  -3   23.90    2.90
  15 -11   3   22.50    2.80
 -15  11   3   21.90    2.80
 -15 -11  -3   24.80    2.30
 -15 -12   3    2.10    1.80
 -15  12  -3    5.20    2.40
  15 -12  -3    1.10    2.30
 -15 -12  -3    1.70    1.70
  15 -12   3   -1.60    2.30
 -15  12   3   -2.10    2.20
 -15  13  -3   20.10    2.90
 -15 -13   3   19.50    2.30
  15 -13  -3   21.90    3.00
  15 -13   3   19.40    2.90
 -15 -14   3   -0.50    1.80
  15 -14  -3   -3.00    2.40
  15 -14   3    1.10    1.80
  15 -14   3    0.00    2.50
  15 -15  -3   13.90    2.80
 -15 -15   3    8.90    1.90
  15 -15  -3    4.30    2.30
  15 -15   3    5.40    2.60
  15 -15   3    7.70    2.10
  15 -16  -3    0.00    2.50
  15 -16  -3   -2.60    2.30
  15 -16   3    3.00    2.60
  15 -17  -3   -0.20    2.60
  15 -17  -3    1.10    2.50
  15 -17   3    1.40    2.80
  16   0  -3   -0.10    1.70
 -16   0   3    0.70    1.40
 -16   0   3   -0.80    2.00
  16   0   3    1.50    1.60
 -16   0  -3   -0.60    1.90
 -16   1  -3   11.90    2.20
 -16  -1   3   10.90    2.20
 -16  -1   3   13.00    1.80
  16   1   3    9.20    1.80
  16  -1  -3   15.00    2.10
  16   1  -3   11.90    1.90
 -16   1   3   12.00    2.20
  16  -1   3   14.90    2.00
 -16  -1  -3   11.60    2.00
 -16  -1  -3    8.60    1.40
  16   2   3   28.20    2.50
 -16   2  -3   29.20    2.90
 -16  -2   3   29.30    2.60
  16  -2  -3   30.50    2.70
 -16  -2   3   32.10    2.80
  16  -2   3   34.50    2.70
  16   2  -3   27.30    2.50
 -16  -2  -3   31.90    2.80
 -16   2   3   34.20    3.00
  16  -3  -3    7.60    2.00
 -16   3  -3    6.20    2.10
 -16  -3   3    5.10    1.60
  16   3   3    3.30    1.60
 -16  -3   3    1.80    2.00
  16  -3   3    5.40    1.90
 -16   3   3    3.00    2.10
  16   3  -3    4.80    1.70
 -16  -3  -3    2.80    1.90
 -16  -4   3   28.30    2.50
 -16   4  -3   29.40    2.80
  16  -4  -3   23.10    2.70
 -16  -4   3   25.90    2.60
  16  -4   3   26.30    2.60
  16   4  -3   23.50    2.40
 -16   4   3   24.00    2.80
 -16  -4  -3   24.60    2.60
 -16  -5   3   13.80    2.10
 -16  -5   3    8.00    2.10
  16  -5  -3   14.30    2.30
 -16   5  -3   10.10    2.40
  16  -5   3    8.80    2.10
 -16  -5  -3   10.70    2.00
 -16   5   3   10.40    2.30
 -16   6  -3   32.00    3.20
 -16  -6   3   28.90    2.80
  16  -6  -3   35.10    3.00
 -16  -6  -3   31.60    2.80
 -16   6   3   32.50    3.00
  16  -6   3   29.90    2.90
 -16   7  -3    0.10    2.20
 -16  -7   3    0.40    2.00
  16  -7  -3    1.60    2.10
 -16   7   3    2.70    2.10
 -16  -7  -3    0.10    1.80
  16  -7   3    4.30    2.10
  16  -8  -3   56.09    4.30
 -16   8  -3   52.09    4.40
 -16  -8   3   52.29    4.00
 -16  -8  -3   54.39    3.90
 -16   8   3   53.99    4.40
  16  -8   3   55.19    4.30
  16  -9  -3    4.20    2.30
 -16  -9   3    7.20    2.00
 -16   9  -3    1.80    2.20
 -16  -9  -3    2.20    1.90
  16  -9   3    3.80    2.20
 -16   9   3    4.50    2.30
  16 -10  -3   45.10    3.80
 -16  10  -3   44.50    3.80
 -16 -10   3   50.09    3.80
 -16 -10  -3   39.80    3.50
  16 -10   3   48.30    3.90
 -16  10   3   42.60    3.70
  16 -11  -3    4.00    2.40
 -16 -11   3    2.90    2.00
 -16  11  -3    2.60    2.30
  16 -11   3    5.30    2.50
 -16  11   3    5.40    2.50
 -16 -11  -3    3.10    1.80
 -16  12  -3   25.90    3.10
 -16 -12   3   24.60    2.60
  16 -12  -3   22.20    3.10
 -16  12   3   21.80    3.10
  16 -12   3   26.70    3.10
 -16 -13   3    0.50    1.90
  16 -13  -3    0.60    2.50
  16 -13   3    1.30    2.40
  16 -14  -3   11.60    2.80
 -16 -14   3    8.50    2.10
  16 -14   3    8.40    2.70
  16 -14   3    7.60    2.00
  16 -15  -3   -4.10    2.50
 -16 -15   3    2.10    1.90
  16 -15   3    5.00    2.70
  16 -16  -3    3.90    2.70
  16 -16  -3    3.50    2.50
  16 -16   3    1.10    2.80
 -17   0   3   -1.10    2.10
  17   0   3   -1.50    1.70
 -17   0  -3    2.70    2.10
 -17   0   3   -1.90    1.60
  17   0  -3   -2.50    1.70
 -17  -1   3   14.10    2.40
 -17   1  -3   16.80    2.40
 -17  -1   3   12.60    1.90
  17  -1  -3   18.50    2.20
  17  -1   3   17.00    2.10
  17   1  -3   18.70    2.20
 -17  -1  -3   12.20    2.30
 -17   1   3   10.40    1.90
 -17   1   3   15.10    2.50
 -17  -2   3    8.80    2.20
  17  -2  -3    5.60    2.10
  17   2   3    5.80    1.80
 -17  -2   3    6.00    1.80
 -17   2  -3    6.90    2.30
 -17   2   3    5.30    2.20
 -17  -2  -3    5.40    2.10
  17  -2   3    5.20    2.00
  17   2  -3    4.80    1.80
  17  -3  -3   29.60    2.80
 -17  -3   3   33.60    2.90
 -17   3  -3   28.50    2.90
 -17  -3   3   23.20    2.70
  17   3  -3   25.60    2.50
 -17  -3  -3   27.10    2.70
  17  -3   3   27.00    2.70
 -17   3   3   27.50    3.00
  17  -4  -3    6.70    2.20
 -17  -4   3    6.40    1.90
 -17  -4   3    4.80    2.20
 -17   4  -3    8.00    2.40
 -17  -4  -3    4.90    2.10
 -17   4   3    8.50    2.40
  17  -4   3    9.20    2.10
 -17   5  -3   25.80    2.90
  17  -5  -3   27.60    2.80
 -17  -5   3   23.30    2.50
 -17  -5   3   20.70    2.60
 -17  -5  -3   26.30    2.60
 -17   5   3   23.50    2.80
  17  -5   3   20.30    2.60
  17  -6  -3   32.60    3.00
 -17  -6   3   31.10    3.00
 -17   6  -3   27.10    3.00
 -17  -6  -3   28.20    2.80
 -17   6   3   28.00    3.10
  17  -6   3   27.20    2.90
 -17  -7   3   12.60    2.30
 -17   7  -3   13.30    2.60
  17  -7  -3   11.60    2.50
 -17  -7  -3   16.00    2.30
  17  -7   3   15.40    2.50
 -17   7   3   13.10    2.60
 -17  -8   3   29.90    2.90
  17  -8  -3   33.40    3.10
 -17   8  -3   28.60    3.30
 -17   8   3   27.00    3.20
 -17  -8  -3   29.40    2.80
  17  -8   3   29.00    3.00
 -17  -9   3   21.30    2.50
 -17   9  -3   21.20    2.80
  17  -9  -3   16.20    2.70
  17  -9   3   13.30    2.70
 -17   9   3   18.40    2.80
 -17  -9  -3   16.20    2.40
 -17  10  -3   30.10    3.40
  17 -10  -3   35.10    3.50
 -17 -10   3   34.30    3.10
 -17  10   3   33.80    3.40
  17 -10   3   35.00    3.50
 -17 -10  -3   33.00    2.90
 -17  11  -3    4.90    2.50
 -17 -11   3    4.90    2.10
  17 -11  -3    4.30    2.60
 -17  11   3    1.30    2.40
  17 -11   3    3.10    2.60
 -17 -11  -3    6.30    2.10
 -17  12  -3   24.40    3.30
 -17 -12   3   24.20    2.70
  17 -12  -3   24.20    3.30
 -17  12   3   21.50    3.10
 -17 -12  -3   30.60    2.70
  17 -13  -3    7.40    2.80
 -17 -13   3    8.40    2.20
  17 -13   3    9.20    2.70
  17 -14  -3    7.50    2.90
 -17 -14   3    8.90    2.30
  17 -14   3    6.10    2.80
  17 -15  -3    0.50    2.80
  17 -15   3    2.20    2.70
  17 -16  -3   -0.80    2.80
  17 -16  -3    1.40    2.60
 -18   0   3    8.80    1.90
 -18   0   3   14.30    2.60
 -18   0  -3   11.00    2.40
  18   0   3   12.00    2.00
  18   0  -3   12.80    2.20
 -18  -1   3    4.10    2.30
 -18   1  -3    3.50    2.30
  18  -1  -3    4.80    2.10
 -18  -1   3    5.60    1.80
  18   1   3    4.10    1.80
 -18   1   3    2.40    1.70
 -18   1   3   -1.40    2.30
  18  -1   3    3.30    2.00
  18   1  -3   -0.20    1.90
 -18  -1  -3    5.60    2.20
 -18  -2   3    5.70    1.80
 -18  -2   3    3.80    2.30
  18  -2  -3    8.30    2.10
 -18   2  -3    4.10    2.40
  18   2  -3    1.70    1.90
 -18  -2  -3    3.20    2.10
  18  -2   3    4.10    2.00
 -18   2   3    7.50    2.40
 -18  -3   3   17.90    2.60
  18  -3  -3   12.30    2.50
 -18  -3   3   14.40    2.20
 -18   3  -3   12.00    2.60
  18  -3   3   14.80    2.40
 -18   3   3   13.90    2.70
 -18  -3  -3   13.10    2.50
 -18  -4   3    7.10    2.00
  18  -4  -3    9.50    2.40
 -18   4  -3    5.50    2.50
 -18  -4   3    8.20    2.40
 -18   4   3   12.50    2.60
 -18  -4  -3    9.50    2.30
  18  -4   3   12.10    2.30
  18  -5  -3   15.80    2.70
 -18   5  -3   16.60    2.90
 -18  -5   3   19.10    2.70
  18  -5   3   18.40    2.60
 -18  -5  -3   21.30    2.60
 -18   5   3   16.40    2.80
 -18  -6   3    6.40    2.40
 -18   6  -3    6.50    2.50
  18  -6  -3    2.60    2.40
  18  -6   3    6.80    2.30
 -18   6   3    6.20    2.60
 -18  -6  -3    5.60    2.20
 -18   7  -3   19.70    2.90
 -18  -7   3   16.40    2.70
  18  -7  -3   16.10    2.80
 -18   7   3   21.40    3.00
 -18  -7  -3   17.70    2.50
  18  -7   3   17.80    2.70
 -18   8  -3   -0.20    2.40
  18  -8  -3    3.80    2.50
 -18  -8   3   -1.60    2.20
 -18  -8  -3    0.10    2.10
  18  -8   3    3.20    2.30
 -18   8   3   -1.80    2.50
 -18  -9   3   42.50    3.90
 -18   9  -3   38.50    3.70
  18  -9  -3   36.80    3.60
 -18   9   3   40.90    3.80
 -18  -9  -3   37.90    3.30
  18  -9   3   36.90    3.70
 -18 -10   3    9.40    2.50
  18 -10  -3   10.70    2.80
 -18  10  -3    8.40    2.70
 -18 -10  -3    8.20    2.30
 -18  10   3    4.10    2.70
 -18 -11   3   14.10    2.60
 -18  11  -3   17.50    3.00
  18 -11  -3   13.40    3.00
 -18  11   3   13.30    2.90
 -18 -11  -3   13.00    2.40
  18 -11   3   13.10    2.90
  18 -12  -3    3.20    2.80
 -18 -12   3    4.80    2.40
 -18  12  -3    6.60    2.80
 -18  12   3    4.30    2.70
  18 -12   3    3.80    2.70
 -18 -13   3    9.70    2.40
  18 -13  -3    9.10    2.90
  18 -14  -3    2.00    2.80
  18 -14   3    1.00    2.70
  18 -15   3    2.70    2.90
  19   0  -3   20.20    2.50
 -19   0  -3   20.60    2.80
 -19   0   3   19.90    2.90
  19  -1  -3    1.00    2.10
 -19  -1   3   -2.40    2.40
 -19   1  -3   -1.40    2.40
  19  -1   3   -2.30    2.00
 -19  -1  -3   -2.00    2.30
 -19   1   3    0.10    2.50
 -19  -2   3    6.00    2.40
  19  -2  -3    8.70    2.30
 -19  -2   3    7.70    1.90
 -19   2  -3    7.50    2.50
  19  -2   3    6.80    2.20
 -19   2   3    8.00    2.60
 -19  -2  -3    7.70    2.40
 -19   3  -3   12.00    2.80
  19  -3  -3   14.00    2.60
 -19  -3   3   10.50    2.60
 -19  -3   3   13.80    2.20
 -19  -3  -3   17.40    2.70
  19  -3   3   14.70    2.60
 -19   3   3   11.80    2.80
  19  -4  -3   23.70    2.90
 -19  -4   3   19.70    2.50
 -19   4  -3   20.40    3.10
 -19  -4   3   20.20    2.90
 -19  -4  -3   21.10    2.80
  19  -4   3   21.10    2.70
 -19   4   3   19.00    3.00
 -19  -5   3   15.10    2.70
 -19   5  -3    9.70    2.80
  19  -5  -3   11.50    2.70
  19  -5   3   16.90    2.70
 -19   5   3   10.70    2.80
 -19  -5  -3   13.20    2.70
 -19   6  -3    4.20    2.70
 -19  -6   3    5.00    2.50
  19  -6  -3    2.20    2.40
 -19  -6  -3    1.90    2.40
  19  -6   3    7.50    2.40
 -19   6   3    1.40    2.60
  19  -7  -3   10.90    2.90
 -19   7  -3   11.40    3.00
 -19  -7   3    5.80    2.50
  19  -7   3   10.90    2.60
 -19  -7  -3   15.20    2.60
 -19   7   3    8.30    2.80
 -19  -8   3   11.80    2.70
  19  -8  -3    7.40    2.70
 -19   8  -3   12.50    3.00
 -19   8   3   11.10    2.80
 -19  -8  -3   11.50    2.50
  19  -9  -3   29.70    3.40
 -19   9  -3   26.40    3.60
 -19  -9   3   29.20    3.20
 -19   9   3   23.60    3.50
 -19  -9  -3   32.90    3.20
  19  -9   3   31.20    3.40
 -19 -10   3    3.80    2.40
  19 -10  -3   -1.10    2.70
 -19  10  -3    2.60    2.70
 -19 -10  -3    1.10    2.20
 -19  10   3    1.20    2.60
 -19  11  -3   16.10    3.00
 -19 -11   3   17.10    2.80
  19 -11  -3   17.20    3.30
  19 -11   3   15.10    3.10
 -19  11   3   13.20    3.10
 -19 -12   3    6.30    2.50
  19 -12  -3    4.90    2.90
  19 -12   3    6.60    2.80
 -19 -12  -3   -0.70    2.20
 -19 -13   3   17.90    2.70
  19 -13   3   11.30    3.10
  19 -14  -3   -2.40    2.90
 -20   0  -3   -1.10    2.50
 -20   0   3    1.70    2.70
 -20  -1   3    7.10    2.80
  20  -1  -3    8.30    2.30
 -20   1  -3    8.50    2.70
 -20  -1  -3    7.30    2.60
 -20   1   3    4.00    2.70
 -20   2  -3    3.20    2.70
 -20  -2   3    1.10    2.50
  20  -2  -3   -0.30    2.30
  20  -2   3    1.60    2.30
 -20  -2  -3   -2.10    2.40
 -20   2   3    0.50    2.70
 -20  -3   3    6.70    2.70
 -20   3  -3    4.20    2.80
  20  -3  -3    7.20    2.40
 -20  -3  -3    7.20    2.60
 -20   3   3    5.50    2.70
  20  -3   3    2.30    2.20
  20  -4  -3    3.90    2.40
 -20  -4   3    3.80    2.70
 -20   4  -3    2.30    2.80
 -20  -4  -3    7.10    2.60
 -20   4   3    8.70    2.90
  20  -5  -3    9.60    2.70
 -20  -5   3   11.80    3.00
 -20   5  -3    4.00    2.80
  20  -5   3    7.60    2.50
 -20   5   3    6.20    2.90
 -20  -5  -3    6.80    2.50
 -20  -6   3    4.70    2.70
 -20   6  -3    9.50    3.00
  20  -6  -3    7.10    2.70
 -20  -6  -3    6.00    2.60
 -20   6   3    4.30    2.90
 -20   7  -3    3.70    2.90
 -20  -7   3    1.70    2.60
  20  -7  -3   -0.10    2.60
 -20  -7  -3    4.30    2.50
 -20   7   3    0.20    2.70
 -20   8  -3   14.30    3.10
 -20  -8   3   12.00    2.90
 -20  -8  -3   10.40    2.70
  20  -8   3   13.20    2.90
 -20   8   3    9.50    3.00
  20  -9  -3   -1.40    2.80
 -20  -9   3   -2.30    2.60
 -20   9  -3    6.50    3.00
 -20   9   3   -0.70    2.80
  20  -9   3    0.30    2.70
 -20  -9  -3    0.10    2.40
 -20  10  -3   12.50    3.20
  20 -10  -3   10.90    3.10
 -20  10   3    6.80    3.10
 -20 -10  -3    7.20    2.60
 -20 -11   3    2.30    2.60
 -20 -11  -3    0.70    2.40
 -20  11   3    3.80    3.00
 -20 -12   3    1.10    2.60
  20 -12   3    4.10    3.00
 -21   0   3   -1.10    2.80
 -21   0  -3    1.00    2.80
 -21  -1   3   10.10    3.00
 -21   1  -3    5.70    3.00
 -21  -1  -3   11.30    2.90
 -21   1   3   15.50    3.10
 -21  -2   3    4.30    2.80
 -21   2  -3    7.10    3.00
  21  -2  -3    6.60    2.60
 -21   2   3    8.60    3.00
 -21  -2  -3   10.10    2.80
  21  -3  -3    8.60    2.70
 -21   3  -3    9.00    3.00
 -21  -3   3    8.60    2.90
 -21   3   3    9.70    3.00
  21  -3   3   11.80    2.50
 -21  -3  -3    8.40    2.80
  21  -4  -3   30.40    3.50
 -21  -4   3   27.00    3.60
 -21   4  -3   29.10    3.70
 -21   4   3   26.10    3.60
  21  -4   3   29.20    3.30
 -21  -5   3   12.40    3.00
 -21   5  -3   13.40    3.30
 -21  -5  -3   10.10    2.80
 -21   5   3    8.50    3.00
 -21   6  -3   10.80    3.10
 -21  -6   3   13.50    3.10
  21  -6  -3   15.00    3.00
 -21  -6  -3   14.00    2.80
 -21   6   3   14.40    3.30
 -21  -7   3   12.80    3.10
 -21   7  -3   13.30    3.30
  21  -7  -3   12.40    3.10
  21  -7   3   11.30    2.90
 -21   7   3   15.60    3.30
 -21  -7  -3   15.30    3.00
 -21  -8   3   27.10    3.60
 -21   8  -3   27.10    3.80
  21  -8   3   32.80    3.70
 -21  -8  -3   32.20    3.40
 -21   8   3   27.50    3.90
 -21  -9   3    3.50    2.80
 -21   9  -3    6.10    3.10
 -21   9   3    3.50    3.10
  21 -10  -3   23.00    3.70
 -21 -10   3   27.30    3.50
 -21  10  -3   21.90    3.70
  21 -10   3   24.50    3.50
  21 -11  -3    1.30    3.00
 -21  11  -3    5.50    3.20
 -22   0   3    7.80    3.10
 -22   0  -3   11.00    3.10
 -22   1  -3   -1.30    3.00
 -22  -1   3    6.30    3.10
 -22   1   3    1.30    3.10
 -22  -1  -3   -3.00    2.70
 -22  -2   3    6.80    3.10
 -22   2  -3    1.20    3.00
 -22   2   3    2.60    3.10
 -22  -2  -3    4.50    3.00
 -22   3  -3    3.50    3.10
 -22  -3   3   -0.10    2.90
 -22  -3  -3    2.30    2.90
 -22   3   3   -1.10    3.00
 -22   4  -3    7.20    3.10
 -22  -4   3    5.80    3.20
  22  -4  -3    5.10    2.80
 -22   4   3    7.60    3.30
 -22  -4  -3    9.90    3.00
  22  -4   3    4.30    2.60
 -22  -5   3    0.90    3.00
  22  -5  -3    0.60    2.80
 -22   5  -3    0.00    3.00
 -22   5   3   -0.30    3.00
 -22   6  -3    2.10    3.10
  22  -6  -3    5.80    2.90
 -22  -6   3    2.50    3.00
  22  -6   3    8.80    2.80
 -22   6   3    4.90    3.10
 -22  -7  -3    5.70    2.80
  22  -7   3    5.10    2.90
  22  -8  -3    1.40    3.00
 -22   8  -3    2.40    3.20
  22  -8   3    5.40    2.90
 -22  -8  -3    3.30    2.90
 -22   9  -3    1.20    3.20
 -22  -9   3    3.00    3.00
 -22  -9  -3    2.50    2.80
  22  -9   3    2.10    3.00
 -23   0  -3    0.90    3.10
 -23   0   3    5.40    3.30
 -23  -1   3    0.30    3.20
 -23   1  -3    1.40    3.10
 -23   1   3   -2.60    3.10
 -23  -1  -3   -2.00    3.00
 -23   2  -3    1.10    3.20
 -23  -2   3    2.60    3.20
 -23  -2  -3    3.80    3.10
 -23   2   3    6.50    3.30
 -23  -3   3    9.80    3.40
 -23   3   3   13.10    3.60
 -23  -3  -3   16.10    3.40
 -23   4  -3   -2.10    3.10
 -23  -4   3    2.80    3.20
 -23  -4  -3    3.30    3.00
 -23   4   3    4.60    3.30
 -23  -5   3   13.90    3.40
 -23   5  -3   14.80    3.50
 -23  -5  -3   11.20    3.20
 -23   5   3   18.40    3.70
 -23  -6  -3    2.40    3.00
  23  -6   3    5.30    2.90
 -23   6   3    6.50    3.40
 -23   7  -3   22.50    3.90
 -23  -7   3   21.40    3.90
  23  -7  -3   24.50    3.70
 -24   0  -3    0.20    3.30
 -24   0   3    1.00    3.50
 -24  -1   3   11.60    3.60
 -24   1  -3   12.10    3.50
 -24   1   3    9.40    3.70
 -24  -1  -3    5.80    3.40
 -24  -2   3    1.90    3.30
 -24  -2  -3    0.00    3.20
 -24   2   3   -0.80    3.40
 -24   3  -3    5.60    3.50
 -24  -3   3    5.90    3.40
 -24  -3  -3    0.10    3.20
 -24   3   3    4.00    3.50
 -24   4  -3    4.20    3.50
 -24  -4   3    1.70    3.30
 -24  -4  -3   -2.90    3.20
 -24   4   3   -0.80    3.30
   0   0  -4    6.70    0.60
   0   0  -4   11.00    0.70
   0   0   4   10.70    0.70
   0   0   4    8.90    0.60
   0   1  -4    0.10    0.30
   0   1  -4    0.00    0.30
   0  -1   4   -0.50    0.30
   0   1   4    0.40    0.30
   0  -1  -4    0.00    0.20
   0  -1  -4   -0.30    0.30
   0  -1   4    0.10    0.30
   0   1   4    0.40    0.20
   0  -2   4   17.60    1.00
   0  -2  -4   16.30    0.90
   0   2  -4   18.80    1.00
   0  -2  -4   13.20    0.90
   0  -2   4   13.50    0.80
   0  -2   4   16.60    1.00
   0  -2   4   15.20    1.00
   0   2   4   14.40    0.90
   0   2  -4   12.70    0.90
   0  -3  -4    0.10    0.60
   0  -3   4    0.00    0.50
   0  -3   4   -0.40    0.60
   0  -3  -4    0.50    0.50
   0  -3   4   -0.20    0.60
   0   3  -4   -0.50    0.60
   0  -3  -4   -0.20    0.20
   0  -4   4  271.47   12.40
   0  -4  -4  277.67   12.50
   0  -4   4  262.67   12.80
   0  -4   4  272.47   12.80
   0   4   4  253.47   12.70
   0   4  -4  292.57   12.80
   0  -4  -4  255.77   12.70
   0  -5   4   -0.30    0.60
   0   5  -4   -0.40    0.70
   0  -5  -4    0.00    0.50
   0  -5  -4    0.90    0.70
   0  -5   4   -1.00    0.70
   0  -5   4   -0.20    0.60
   0   5   4    0.10    0.50
   0  -6  -4  148.19    7.00
   0  -6   4  142.19    7.10
   0  -6   4  149.09    7.10
   0  -6  -4  151.98    7.00
   0   6  -4  151.88    7.10
   0  -6   4  141.19    6.90
   0  -7   4   -0.50    0.70
   0  -7   4    0.30    0.70
   0  -7  -4    0.20    0.60
   0  -7  -4   -0.90    0.80
   0   7  -4   -0.10    0.70
   0  -7  -4   -0.60    0.30
   0  -7   4   -0.50    0.80
   0  -8  -4   24.10    1.70
   0  -8  -4   28.40    2.00
   0  -8   4   27.40    1.80
   0  -8   4   28.80    1.90
   0   8  -4   28.20    1.80
   0  -8   4   26.20    1.80
   0  -9  -4    0.60    0.50
   0   9  -4   -0.30    0.80
   0  -9   4    0.10    0.90
   0  -9   4    2.40    1.00
   0  -9  -4    0.90    0.70
   0  -9  -4   -1.00    1.10
   0  -9   4   -1.30    0.80
   0 -10   4  117.89    5.40
   0  10  -4  104.49    5.30
   0 -10   4  112.69    5.40
   0 -10   4   95.19    5.30
   0 -10  -4  123.49    5.50
   0 -10  -4   94.19    5.20
   0 -11   4    1.30    1.20
   0 -11  -4    2.60    0.80
   0  11  -4   -1.90    0.90
   0 -11  -4    1.30    0.70
   0 -11   4   -0.70    0.90
   0 -11   4    0.20    1.00
   0 -11  -4   -2.50    1.20
   0 -12  -4   16.80    1.20
   0 -12   4   14.50    1.60
   0 -12   4   10.70    1.30
   0  12  -4   12.30    1.20
   0 -12  -4   10.90    1.70
   0 -12  -4    8.70    1.10
   0 -13   4   -0.10    1.10
   0 -13   4   -0.20    1.40
   0 -13  -4    1.10    1.00
   0 -13  -4   -0.50    1.50
   0 -14   4   -1.00    1.60
   0 -14   4    1.70    1.20
   0 -14  -4    0.70    1.60
   0 -14  -4    0.90    1.00
   0 -15   4    0.90    1.30
   0 -15  -4   -0.10    1.80
   0 -15  -4    0.60    1.10
   0 -15   4   -1.30    1.70
   0 -16  -4   -0.40    2.00
   0 -16  -4    2.40    1.20
   0 -16   4    4.80    1.90
   0 -16   4    2.70    1.40
   0 -17   4    1.50    1.40
   0 -17  -4    0.50    1.20
   0 -17   4   -0.20    1.90
   0 -17  -4   -0.90    2.00
   0 -18  -4    2.60    1.30
   0 -18   4    0.10    1.50
   0 -18  -4    0.30    2.20
   0 -18   4    1.90    2.20
   0 -19   4    2.60    1.70
   0 -19  -4   -0.20    2.40
   0 -19   4    0.80    2.40
   0 -20   4   16.40    2.90
   0 -20  -4   15.40    2.80
   0 -20   4   15.00    2.10
   0 -21   4    3.30    1.80
   0 -21  -4   -1.10    2.70
   0 -21   4    0.00    2.70
   0 -22   4    3.40    1.90
   0 -22  -4    9.50    3.10
   0 -22   4    7.70    3.10
  -1   0  -4    5.10    0.50
   1   0   4    5.50    0.40
  -1   0   4    5.60    0.50
  -1   0  -4    5.50    0.50
   1   0  -4    5.40    0.40
   1   0  -4    5.30    0.50
  -1   0   4    4.90    0.40
   1   0   4    6.00    0.50
  -1   1  -4   12.30    0.90
   1  -1  -4   10.40    0.80
  -1  -1   4   15.80    0.90
   1  -1  -4   12.40    0.80
   1   1   4   15.20    0.80
  -1  -1   4   11.50    0.80
   1   1   4   11.70    0.80
  -1   1  -4   13.30    0.80
   1  -1   4   13.00    0.70
  -1   1   4   11.40    0.80
  -1  -1  -4   14.30    0.80
  -1   1   4   11.10    0.80
  -1  -1  -4   13.80    0.80
   1   1  -4   14.30    0.80
   1   1  -4   14.00    0.80
   1  -1   4   11.90    0.90
  -1  -1  -4   12.40    0.70
   1  -1   4   11.90    0.80
   1  -2  -4  219.88   10.60
   1   2   4  239.28   10.60
   1  -2  -4  190.18   10.60
  -1  -2   4  231.78   10.80
   1   2   4  213.68   10.60
  -1  -2   4  216.88   10.60
  -1  -2   4  251.17   10.60
  -1   2  -4  234.58   10.60
   1  -2   4  229.68   10.60
  -1  -2  -4  220.28   10.30
  -1  -2  -4  243.88   10.60
   1  -2   4  203.58   10.30
  -1   2   4  211.68   10.60
   1   2  -4  246.68   10.60
   1  -2   4  210.18   10.60
  -1  -3   4  217.28    9.50
   1  -3  -4  191.38    9.50
   1  -3  -4  178.98    9.50
  -1  -3   4  194.78    9.50
  -1  -3   4  214.88    9.80
  -1   3  -4  206.58    9.60
  -1  -3   4  207.88    9.30
  -1  -3  -4  203.88    9.50
   1  -3   4  194.08    9.50
   1  -3   4  193.78    9.20
  -1  -3  -4  198.88    9.30
   1  -3   4  206.58    9.60
  -1   3   4  194.58    9.50
   1   3  -4  208.68    9.50
  -1  -4   4  356.06   15.10
   1  -4  -4  301.57   15.10
  -1  -4   4  325.97   14.80
  -1   4  -4  325.37   15.10
  -1  -4   4  322.67   15.10
   1   4  -4  352.86   15.10
   1  -4   4  311.67   15.10
  -1   4   4  299.17   15.10
   1  -4   4  305.07   15.10
   1  -4   4  308.87   14.70
  -1  -4  -4  312.37   14.80
   1  -5  -4   15.20    1.20
  -1  -5   4   11.10    0.90
  -1  -5   4   10.70    0.90
  -1   5  -4   12.40    1.00
  -1  -5   4   10.20    1.00
   1  -5  -4   10.20    0.90
   1  -5   4   10.00    1.00
   1  -5   4   11.40    1.00
   1   5  -4   14.80    1.10
   1  -5   4   10.50    1.00
  -1  -5  -4   12.40    1.00
  -1   5   4   10.80    1.00
  -1  -6   4  116.99    5.40
  -1   6  -4  114.99    5.40
  -1  -6   4  105.69    5.30
   1  -6  -4  113.69    5.40
   1  -6  -4  114.89    5.40
  -1  -6   4  100.49    5.40
  -1  -6  -4  115.69    5.40
   1   6  -4  113.69    5.40
   1  -6   4  109.09    5.30
  -1   6   4  112.19    5.40
   1  -6   4  104.19    5.40
   1  -6   4  109.09    5.40
  -1  -7   4    7.00    0.90
   1  -7  -4    4.10    0.90
  -1  -7   4    5.70    0.80
  -1  -7   4    7.00    0.80
  -1   7  -4    5.50    0.90
   1  -7  -4    3.00    0.60
   1  -7  -4    6.50    0.80
  -1   7   4    5.60    0.70
   1  -7   4    6.90    0.90
   1   7  -4    6.10    0.80
   1  -7   4    5.30    0.80
  -1  -7  -4    5.90    1.00
   1  -7   4    5.70    0.90
   1  -8  -4   40.20    2.60
  -1   8  -4   44.40    2.50
  -1  -8   4   39.90    2.40
   1  -8  -4   45.50    2.40
  -1  -8   4   45.10    2.40
  -1  -8   4   43.20    2.50
   1  -8   4   36.40    2.40
   1  -8   4   43.90    2.50
  -1   8   4   40.70    2.30
   1   8  -4   43.60    2.40
  -1  -8  -4   43.70    2.60
   1  -8   4   43.20    2.40
  -1  -9   4  225.78   10.60
  -1  -9   4  197.78   10.60
  -1  -9   4  234.58   10.50
  -1   9  -4  220.58   10.60
   1  -9  -4  232.18   10.50
   1  -9  -4  231.18   10.60
   1   9  -4  215.28   10.60
  -1   9   4  209.08   10.50
  -1  -9  -4  232.68   10.50
   1  -9   4  226.58   10.70
   1  -9   4  205.58   10.60
   1  -9   4  235.48   10.50
   1 -10  -4  178.68    8.00
   1 -10  -4  168.38    8.00
  -1 -10   4  177.48    7.90
  -1 -10   4  142.59    8.00
  -1 -10   4  166.08    8.00
  -1  10  -4  161.58    8.00
  -1 -10  -4  180.68    8.00
   1 -10   4  172.78    8.00
   1 -10   4  147.79    8.00
   1 -10   4  168.58    7.90
  -1  10   4  159.48    7.90
   1  10  -4  154.88    7.90
   1 -11  -4  366.46   16.00
  -1 -11   4  341.57   16.00
   1 -11  -4  347.87   15.80
  -1 -11   4  353.06   15.70
  -1 -11   4  296.67   16.00
  -1  11  -4  327.37   16.00
   1  11  -4  318.27   15.90
  -1 -11  -4  349.07   15.80
   1 -11   4  285.17   16.00
   1 -11   4  355.36   16.00
   1 -11   4  357.96   15.70
  -1  12  -4   86.19    4.70
   1 -12  -4   95.59    5.00
  -1 -12   4   97.69    4.90
   1 -12  -4   98.59    4.70
  -1 -12   4   91.19    4.70
  -1 -12  -4   90.49    4.90
   1 -12   4   87.79    4.80
   1 -12   4   91.69    4.80
   1  12  -4   86.89    4.60
  -1 -13   4  139.19    7.40
   1 -13  -4  153.58    7.60
   1 -13  -4  160.28    7.40
  -1 -13   4  152.68    7.50
   1 -13   4  146.69    7.40
  -1 -13  -4  152.38    7.60
   1 -13   4  145.09    7.50
   1 -14  -4   41.70    3.10
  -1 -14   4   35.70    2.60
   1 -14  -4   37.70    2.50
  -1 -14   4   37.00    3.00
  -1 -14  -4   36.70    3.10
   1 -14   4   38.50    3.00
   1 -14   4   38.30    2.70
  -1 -15   4   43.30    3.00
   1 -15  -4   45.00    3.60
  -1 -15   4   47.60    3.50
   1 -15  -4   46.20    2.90
   1 -15   4   50.59    3.50
   1 -15   4   43.10    3.10
  -1 -15  -4   49.30    3.60
   1 -16  -4   30.90    2.80
  -1 -16   4   26.10    2.20
  -1 -16   4   31.80    2.80
   1 -16  -4   31.60    2.50
  -1 -16  -4   30.10    2.80
   1 -16   4   31.10    2.70
   1 -16   4   26.40    2.30
   1 -17  -4   43.40    2.90
  -1 -17   4   38.70    3.00
   1 -17  -4   43.50    3.80
  -1 -17   4   43.70    3.40
   1 -17   4   39.20    3.10
   1 -17   4   40.30    3.60
  -1 -17  -4   41.60    3.40
   1 -18  -4   16.60    2.70
  -1 -18   4   16.30    1.90
  -1 -18   4   22.60    2.70
   1 -18  -4   18.50    1.80
   1 -18   4   15.70    2.00
   1 -18   4   23.50    2.60
  -1 -18  -4   18.40    2.70
  -1 -19   4   21.20    2.10
   1 -19  -4   26.30    3.10
  -1 -19   4   27.70    3.10
   1 -19  -4   22.70    2.10
   1 -19   4   19.70    2.20
   1 -19   4   22.90    2.90
  -1 -19  -4   23.00    3.00
   1 -20  -4   22.80    3.10
  -1 -20   4   10.80    1.90
   1 -20  -4   14.70    1.90
  -1 -20   4   15.10    2.90
  -1 -20  -4   15.10    2.80
   1 -20   4   13.30    2.10
   1 -20   4   15.80    2.80
   1 -21  -4   24.30    3.30
  -1 -21   4   25.00    3.40
  -1 -21   4   20.60    2.30
  -1 -21  -4   24.90    3.40
   1 -21   4   24.80    3.30
   1 -21   4   20.80    2.50
   1 -22  -4   10.50    3.00
  -1 -22   4    7.50    3.10
   1 -22   4   14.40    3.20
   1 -22   4    6.00    2.00
  -1 -22  -4    7.10    3.10
  -2   0  -4  129.59    6.20
   2   0  -4  126.29    6.20
  -2   0   4  117.79    6.20
  -2   0  -4  120.79    6.20
   2   0  -4  135.19    6.20
   2   0   4  135.59    6.20
  -2   0  -4  124.59    5.90
  -2   0   4  136.49    6.20
  -2   1  -4   -0.50    0.40
   2   1   4   -0.50    0.40
   2  -1  -4    0.10    0.40
  -2   1  -4   -0.40    0.40
  -2  -1   4    0.70    0.40
  -2  -1   4    1.00    0.40
   2  -1  -4    0.40    0.40
  -2  -1  -4    0.30    0.30
   2   1  -4    0.10    0.40
  -2  -1  -4    0.30    0.40
   2  -1   4    0.40    0.30
  -2   1   4   -0.10    0.50
  -2  -1  -4    1.10    0.40
   2  -1   4   -0.30    0.50
   2   2   4  373.06   15.50
  -2  -2   4  348.57   15.50
   2  -2  -4  322.17   15.50
  -2   2  -4  316.37   15.50
  -2  -2   4  316.97   15.80
  -2  -2   4  302.87   15.50
  -2  -2  -4  319.47   15.50
  -2   2   4  337.17   15.50
   2  -2   4  320.87   15.50
   2   2  -4  337.97   15.50
  -2  -2  -4  320.17   15.10
  -2   3  -4   38.70    2.20
  -2  -3   4   37.60    2.00
  -2  -3   4   35.70    2.20
  -2  -3   4   41.20    2.10
   2  -3  -4   34.50    2.10
   2  -3  -4   39.10    2.10
   2  -3   4   36.70    1.90
  -2   3   4   38.20    2.10
  -2  -3  -4   35.40    2.00
   2  -3   4   38.10    2.20
   2   3  -4   40.50    2.10
  -2  -3  -4   37.80    1.90
   2  -4  -4  240.98   13.00
   2  -4  -4  266.27   13.00
  -2  -4   4  267.97   13.00
  -2   4  -4  289.77   13.00
  -2  -4   4  273.47   12.70
  -2  -4   4  305.97   13.00
  -2  -4  -4  274.27   12.70
   2  -4   4  264.77   12.60
  -2   4   4  269.57   13.00
   2   4  -4  298.37   13.00
   2  -4   4  262.57   13.00
  -2   5  -4  172.58    8.40
  -2  -5   4  185.28    8.30
   2  -5  -4  173.48    8.30
  -2  -5   4  166.48    8.30
   2  -5  -4  159.08    8.30
  -2  -5   4  172.98    8.20
   2  -5   4  173.08    8.30
   2  -5   4  167.58    8.10
  -2  -5  -4  173.88    8.20
  -2   5   4  182.98    8.30
   2   5  -4  181.58    8.30
   2  -6  -4  142.99    7.50
   2  -6  -4  164.08    7.50
  -2  -6   4  148.39    7.50
  -2  -6   4  164.88    7.60
  -2   6  -4  159.18    7.60
  -2  -6   4  155.98    7.40
   2  -6  -4  162.08    7.60
   2  -6   4  153.78    7.60
   2   6  -4  156.78    7.50
   2  -6   4  157.68    7.40
  -2   6   4  159.18    7.60
  -2  -6  -4  163.38    7.50
   2  -7  -4   18.50    1.50
  -2  -7   4   20.10    1.50
   2  -7  -4   13.90    1.40
  -2  -7   4   19.90    1.50
  -2   7  -4   19.80    1.60
   2  -7  -4   19.90    1.70
  -2  -7   4   19.00    1.40
   2  -7   4   20.80    1.50
   2  -7   4   19.90    1.60
  -2  -7  -4   21.20    1.60
  -2   7   4   17.90    1.40
   2   7  -4   22.00    1.40
  -2  -8   4  204.28    9.20
  -2  -8   4  203.78    9.30
   2  -8  -4  192.08    9.30
  -2  -8   4  184.78    9.20
  -2   8  -4  197.48    9.30
   2  -8  -4  188.88    9.20
   2  -8  -4  172.88    9.30
   2  -8   4  199.28    9.30
  -2   8   4  193.68    9.30
   2   8  -4  195.78    9.20
   2  -8   4  193.28    9.10
  -2  -8  -4  190.68    9.20
  -2   9  -4   22.40    1.80
  -2  -9   4   26.30    2.00
   2  -9  -4   24.30    1.80
  -2  -9   4   16.50    1.50
  -2  -9   4   20.50    1.70
   2  -9  -4   15.30    1.60
   2  -9  -4   24.80    1.80
  -2  -9  -4   25.90    2.00
   2  -9   4   21.80    1.80
   2  -9   4   22.90    1.80
  -2   9   4   23.10    1.60
   2   9  -4   19.60    1.50
   2 -10  -4    2.70    1.00
  -2  10  -4    0.30    0.90
  -2 -10   4    0.80    0.90
  -2 -10   4    0.30    0.80
  -2 -10   4    0.90    1.10
   2 -10  -4    0.10    1.10
   2 -10  -4    1.20    0.80
   2 -10   4    2.40    1.00
  -2  10   4    2.50    0.70
  -2 -10  -4    1.30    1.20
   2  10  -4    0.70    0.70
   2 -10   4    0.50    1.00
   2 -11  -4   30.00    2.10
  -2 -11   4   35.20    2.50
  -2  11  -4   29.20    2.20
  -2 -11   4   31.30    2.20
   2 -11  -4   37.90    2.20
   2 -11  -4   35.90    2.50
  -2 -11  -4   35.60    2.50
   2 -11   4   32.60    2.40
  -2  11   4   31.80    2.00
   2 -11   4   30.60    2.30
   2  11  -4   30.30    2.00
  -2 -12   4    5.80    1.50
  -2 -12   4    6.30    1.10
   2 -12  -4    6.70    1.50
  -2  12  -4    5.60    1.10
   2 -12  -4    6.00    1.20
  -2  12   4    3.40    0.90
   2 -12   4    3.80    1.30
  -2 -12  -4    2.00    1.50
   2 -12   4    4.00    1.20
   2 -13  -4   14.10    1.80
   2 -13  -4   12.60    1.40
  -2 -13   4    8.80    1.70
  -2  13  -4   11.70    1.40
  -2 -13   4   12.10    1.40
   2 -13   4   11.30    1.50
   2 -13   4   12.10    1.70
  -2 -13  -4   10.90    1.80
  -2 -14   4    2.00    1.60
  -2 -14   4   -0.60    1.10
   2 -14  -4   -1.20    1.60
   2 -14  -4   -1.30    1.20
  -2 -14  -4    1.70    1.70
   2 -14   4   -1.70    1.30
   2 -14   4    0.00    1.50
  -2 -15   4   -0.70    1.20
  -2 -15   4   -0.20    1.80
   2 -15  -4    2.90    1.80
   2 -15  -4    0.50    1.30
   2 -15   4    1.80    1.40
   2 -15   4    2.00    1.70
  -2 -15  -4    0.70    1.90
   2 -16  -4    2.30    2.00
   2 -16  -4    4.20    1.40
  -2 -16   4    3.10    1.40
  -2 -16   4    0.30    1.90
   2 -16   4    0.80    1.50
   2 -16   4    2.00    1.80
  -2 -16  -4    4.40    2.00
   2 -17  -4   -0.80    2.00
  -2 -17   4   -0.10    2.00
  -2 -17   4   -0.10    1.30
   2 -17  -4   -2.30    1.40
  -2 -17  -4   -0.90    2.00
   2 -17   4   -0.40    1.90
   2 -17   4    1.10    1.60
  -2 -18   4    1.60    1.50
   2 -18  -4    0.30    1.50
  -2 -18   4    0.70    2.10
   2 -18  -4    1.90    2.20
   2 -18   4    2.30    2.20
  -2 -18  -4   -0.20    2.20
   2 -18   4    1.60    1.70
  -2 -19   4    4.80    1.60
  -2 -19   4    5.00    2.50
   2 -19  -4    8.50    1.70
   2 -19  -4    7.70    2.60
  -2 -19  -4    6.70    2.40
   2 -19   4    9.90    2.50
   2 -19   4    6.00    1.90
   2 -20  -4    1.60    1.60
   2 -20  -4    3.70    2.70
  -2 -20   4    1.30    1.60
  -2 -20   4    5.80    2.70
   2 -20   4   -1.10    2.40
  -2 -20  -4    1.40    2.50
   2 -20   4   -0.20    1.80
   2 -21  -4    5.70    1.80
   2 -21  -4    8.80    2.90
  -2 -21   4    7.80    2.90
  -2 -21  -4    7.40    2.90
   2 -21   4    6.50    2.00
   2 -21   4    9.60    2.90
  -2 -22   4    1.00    2.90
   2 -22  -4    3.20    3.00
   2 -22   4    0.00    2.00
  -2 -22  -4    1.70    3.00
   2 -22   4   -0.80    2.90
   3   0   4  487.05   22.50
  -3   0   4  488.65   22.60
   3   0  -4  489.95   22.60
  -3   0  -4  461.75   22.50
  -3   0  -4  467.95   22.50
  -3  -1   4   57.09    2.90
   3  -1  -4   58.79    2.90
  -3   1  -4   56.19    3.00
  -3  -1   4   51.39    2.90
   3   1   4   58.59    2.90
  -3  -1  -4   55.89    2.90
  -3  -1  -4   62.09    2.80
   3   1  -4   57.19    2.90
   3  -1   4   56.09    2.90
  -3  -1  -4   55.79    2.80
  -3   1   4   58.79    3.00
  -3  -2   4   53.99    2.50
   3  -2  -4   41.50    2.50
   3   2   4   47.70    2.30
  -3  -2   4   46.20    2.40
  -3   2  -4   45.60    2.50
  -3  -2  -4   37.90    2.30
   3   2  -4   55.99    2.50
  -3  -2  -4   49.50    2.40
  -3  -2  -4   42.10    2.40
  -3   2   4   42.10    2.50
   3  -2   4   44.80    2.50
  -3  -3   4  463.75   22.30
  -3   3  -4  476.15   21.80
   3  -3  -4  448.66   21.80
  -3  -3   4  460.65   21.80
  -3  -3   4  421.36   21.80
  -3   3   4  467.85   21.80
   3   3  -4  474.55   21.80
  -3  -3  -4  468.15   21.20
  -3  -3  -4  463.45   21.70
   3  -3   4  477.25   21.80
  -3  -4   4    7.10    0.80
  -3  -4   4    6.10    0.90
   3  -4  -4    5.00    0.80
   3  -4  -4    2.40    0.70
  -3   4  -4    4.60    0.90
  -3  -4   4    4.90    0.80
  -3  -4   4    5.80    0.70
   3  -4   4    5.30    0.60
   3  -4   4    4.10    0.90
   3   4  -4    6.10    0.70
  -3   4   4    3.70    0.80
  -3  -4  -4    4.80    0.80
  -3   5  -4   34.10    2.20
   3  -5  -4   30.10    2.00
  -3  -5   4   32.50    1.90
  -3  -5   4   39.50    2.00
  -3  -5   4   36.20    2.10
   3  -5   4   29.20    2.10
  -3   5   4   35.00    2.10
  -3  -5  -4   38.90    2.10
   3  -5   4   33.50    1.90
   3   5  -4   38.40    1.90
  -3   6  -4    4.80    0.90
  -3  -6   4    5.60    1.00
  -3  -6   4    7.60    0.80
   3  -6  -4    5.90    0.80
  -3  -6   4    5.20    0.70
   3  -6  -4    6.80    0.90
   3   6  -4    6.80    0.70
   3  -6   4    6.00    0.90
   3  -6   4    7.00    0.80
  -3   6   4    6.60    0.90
  -3  -6  -4    4.60    1.00
  -3  -7   4    2.40    0.70
  -3   7  -4    3.10    0.90
  -3  -7   4    4.80    0.80
  -3  -7   4    2.90    0.90
   3  -7  -4    2.50    0.90
   3  -7  -4    2.80    0.70
   3  -7   4    2.90    0.90
   3   7  -4    3.80    0.70
  -3  -7  -4    4.30    1.00
   3  -7   4    2.40    0.80
  -3   7   4    4.60    0.90
   3  -8  -4  173.78    8.40
   3  -8  -4  158.08    8.40
   3  -8  -4  170.68    8.30
  -3  -8   4  181.98    8.30
  -3   8  -4  173.98    8.40
  -3  -8   4  183.38    8.30
  -3  -8  -4  171.08    8.30
   3   8  -4  171.18    8.30
   3  -8   4  172.28    8.20
  -3   8   4  175.28    8.40
   3  -8   4  174.28    8.40
   3  -9  -4   11.30    1.20
  -3  -9   4   13.80    1.40
  -3  -9   4   15.70    1.20
   3  -9  -4   13.10    1.40
   3  -9  -4   13.60    1.30
  -3   9  -4   13.90    1.30
  -3  -9  -4   13.50    1.50
   3  -9   4   15.30    1.30
   3   9  -4   13.40    1.20
  -3   9   4   15.50    1.20
   3  -9   4   15.40    1.40
   3 -10  -4   76.09    4.10
  -3 -10   4   77.19    4.00
  -3 -10   4   76.39    3.90
   3 -10  -4   68.89    3.90
   3 -10  -4   81.29    4.00
  -3  10  -4   71.69    4.00
   3 -10   4   76.19    3.90
   3 -10   4   76.39    4.10
  -3  10   4   77.19    3.90
  -3 -10  -4   73.79    4.10
   3 -11  -4    4.30    1.30
   3 -11  -4    2.20    0.90
  -3 -11   4    2.80    1.00
  -3 -11   4    4.50    1.40
   3 -11  -4    4.20    1.10
  -3  11  -4    4.80    1.10
  -3 -11  -4    3.60    1.30
   3 -11   4    4.90    1.20
  -3  11   4    4.30    0.90
   3 -11   4    2.30    1.10
   3 -12  -4  149.59    7.20
  -3 -12   4  150.18    7.20
   3 -12  -4  146.19    7.20
  -3  12  -4  135.49    7.20
  -3 -12   4  154.68    7.10
  -3 -12  -4  143.89    7.20
  -3  12   4  133.19    7.00
   3 -12   4  140.89    7.20
   3 -12   4  145.29    7.10
  -3 -13   4    9.40    1.60
   3 -13  -4    6.10    1.60
  -3 -13   4    7.60    1.20
   3 -13  -4    8.30    1.40
  -3  13  -4    8.20    1.30
  -3 -13  -4    6.20    1.70
   3 -13   4    7.20    1.40
   3 -13   4    7.60    1.50
  -3 -14   4   27.30    2.30
   3 -14  -4   31.70    2.50
   3 -14  -4   35.60    2.70
  -3 -14   4   32.50    2.60
   3 -14   4   29.30    2.70
   3 -14   4   31.80    2.50
  -3 -14  -4   27.80    2.60
   3 -15  -4   24.50    2.50
  -3 -15   4   21.50    2.40
  -3 -15   4   22.00    1.90
   3 -15  -4   22.30    2.00
  -3 -15  -4   21.20    2.40
   3 -15   4   22.10    2.10
   3 -15   4   19.70    2.20
  -3 -16   4   30.70    2.60
  -3 -16   4   33.40    3.00
   3 -16  -4   36.00    3.00
   3 -16  -4   30.50    2.70
   3 -16   4   36.90    2.80
   3 -16   4   31.40    2.60
  -3 -16  -4   35.20    3.00
  -3 -17   4   13.30    2.30
  -3 -17   4   11.30    1.60
   3 -17  -4   13.70    1.80
   3 -17  -4   13.50    2.40
  -3 -17  -4   15.20    2.50
   3 -17   4   13.50    2.00
   3 -17   4   14.50    2.30
  -3 -18   4   21.90    2.90
  -3 -18   4   23.20    2.10
   3 -18  -4   24.30    2.90
   3 -18  -4   27.20    2.30
   3 -18   4   19.90    2.30
  -3 -18  -4   26.80    2.90
   3 -18   4   26.10    2.80
   3 -19  -4   15.80    2.00
   3 -19  -4   10.90    2.70
  -3 -19   4   15.00    1.80
  -3 -19   4   11.30    2.70
   3 -19   4   11.80    2.10
  -3 -19  -4   14.40    2.80
   3 -19   4   13.50    2.60
   3 -20  -4   25.30    3.30
  -3 -20   4   20.10    2.10
  -3 -20   4   27.50    3.20
   3 -20  -4   21.50    2.30
  -3 -20  -4   20.00    3.10
   3 -20   4   20.50    2.40
   3 -20   4   21.90    3.10
   3 -21  -4    2.00    2.90
   3 -21  -4    6.00    1.90
  -3 -21   4    8.20    2.80
  -3 -21  -4    3.80    2.80
   3 -21   4    8.00    2.70
   3 -21   4    5.40    2.10
  -3 -22   4   18.60    3.40
   3 -22  -4   14.30    3.40
  -3 -22  -4   17.80    3.50
   3 -22   4   20.00    3.30
   4   0   4  141.19    6.80
  -4   0  -4  135.99    6.80
  -4   0   4  143.79    6.80
   4   0  -4  150.08    6.80
  -4   0  -4  132.59    6.80
  -4  -1   4   26.00    1.70
   4  -1  -4   23.30    1.70
   4   1   4   23.80    1.60
  -4   1  -4   24.90    1.70
   4  -1   4   22.80    1.70
  -4  -1  -4   20.90    1.60
  -4  -1  -4   21.80    1.50
  -4  -1  -4   25.90    1.40
   4   1  -4   26.00    1.70
   4  -2  -4  161.08    7.60
  -4   2  -4  158.18    7.60
   4   2   4  159.38    7.50
  -4  -2   4  147.29    7.50
  -4  -2   4  157.88    7.60
  -4  -2   4  165.08    7.80
   4  -2   4  161.08    7.60
  -4  -2  -4  156.18    7.50
  -4  -2  -4  144.39    7.50
  -4   2   4  160.18    7.60
  -4  -2  -4  159.38    7.40
   4   2  -4  161.28    7.60
   4   3   4 1109.29   51.79
   4  -3  -4 1071.89   51.89
  -4  -3   4 1115.29   52.99
  -4  -3   4 1034.70   51.79
  -4  -3   4 1128.39   51.79
  -4   3  -4 1129.69   51.89
  -4   3   4 1090.09   51.89
  -4  -3  -4 1099.79   51.79
   4   3  -4 1167.58   51.79
   4  -3   4 1104.59   51.89
  -4  -3  -4 1095.29   50.59
  -4  -4   4    5.40    0.90
  -4   4  -4    7.00    1.00
  -4  -4   4    6.20    0.70
   4  -4  -4    5.90    0.90
  -4  -4   4    7.30    0.80
   4   4  -4    7.40    0.80
  -4   4   4    5.60    0.90
  -4  -4  -4    6.90    0.90
   4  -4   4    5.50    0.90
  -4  -5   4  243.48   11.30
   4  -5  -4  241.68   11.40
  -4  -5   4  216.18   11.30
  -4   5  -4  234.08   11.40
  -4  -5   4  237.88   11.10
   4  -5   4  238.78   11.00
  -4  -5  -4  240.78   11.10
  -4   5   4  251.27   11.40
   4   5  -4  237.88   11.30
   4  -5   4  242.28   11.40
  -4  -6   4   12.40    1.00
  -4  -6   4   11.50    1.20
  -4  -6   4   11.80    1.10
   4  -6  -4   11.00    1.20
  -4   6  -4   12.80    1.20
   4   6  -4   11.70    1.00
   4  -6   4   13.60    1.10
   4  -6   4   10.70    1.20
  -4  -6  -4   13.10    1.20
  -4   6   4   13.50    1.20
  -4   7  -4  346.87   16.00
  -4  -7   4  344.37   15.60
  -4  -7   4  320.97   15.90
   4  -7  -4  327.37   16.00
   4  -7   4  341.37   16.00
  -4  -7  -4  329.97   15.60
   4  -7   4  334.67   15.50
   4   7  -4  334.37   15.90
  -4   7   4  341.37   16.00
  -4  -8   4   24.30    1.80
  -4   8  -4   27.70    2.00
  -4  -8   4   25.40    2.00
   4  -8  -4   26.10    2.00
   4  -8   4   23.90    2.10
   4   8  -4   24.70    1.60
   4  -8   4   27.30    1.80
  -4  -8  -4   27.50    2.00
  -4   8   4   31.00    2.00
  -4  -9   4   35.10    2.40
   4  -9  -4   30.00    2.30
   4  -9  -4   32.20    2.30
  -4   9  -4   32.30    2.30
  -4  -9   4   30.30    2.00
  -4  -9  -4   36.60    2.40
   4  -9   4   31.40    2.10
   4  -9   4   31.70    2.30
  -4   9   4   33.90    2.20
  -4 -10   4    5.90    1.30
  -4  10  -4    5.50    1.10
  -4 -10   4    7.80    1.00
   4 -10  -4    6.90    1.20
   4 -10  -4    6.20    1.30
  -4 -10  -4    6.80    1.30
   4 -10   4    5.50    1.10
  -4  10   4    6.90    1.10
   4 -10   4    6.50    1.30
   4 -11  -4    6.00    1.20
  -4 -11   4    3.90    1.40
  -4  11  -4    1.60    1.10
  -4 -11   4    5.80    1.00
   4 -11  -4    8.10    1.40
   4 -11   4    4.50    1.20
  -4  11   4    4.00    1.10
  -4 -11  -4    5.60    1.40
   4 -11   4    5.70    1.30
   4 -12  -4   18.40    1.70
  -4 -12   4   15.70    1.40
   4 -12  -4   16.80    1.80
  -4  12  -4   14.30    1.60
  -4 -12   4   16.10    1.90
  -4  12   4   13.50    1.40
   4 -12   4   17.10    1.70
   4 -12   4   15.90    1.70
  -4 -12  -4   16.30    1.90
  -4  13  -4   -0.90    1.20
   4 -13  -4    2.40    1.50
  -4 -13   4   -0.40    1.10
  -4 -13   4   -0.40    1.50
   4 -13  -4    1.00    1.30
  -4 -13  -4   -1.20    1.60
   4 -13   4   -1.30    1.30
   4 -13   4   -0.90    1.30
   4 -14  -4    5.30    1.70
  -4 -14   4    1.70    1.70
  -4 -14   4    3.10    1.20
   4 -14  -4    2.40    1.40
  -4 -14  -4    2.20    1.80
   4 -14   4    1.20    1.50
   4 -14   4    3.80    1.50
  -4 -15   4    1.10    1.20
   4 -15  -4   -0.70    1.50
  -4 -15   4   -0.70    1.80
   4 -15  -4    1.00    1.80
   4 -15   4    0.10    1.60
   4 -15   4    0.30    1.50
  -4 -15  -4   -2.70    1.80
   4 -16  -4    7.10    2.00
  -4 -16   4   10.60    2.20
   4 -16  -4    8.60    1.70
  -4 -16   4    9.30    1.40
   4 -16   4    9.20    1.80
  -4 -16  -4    9.90    2.20
   4 -16   4    5.60    1.90
   4 -17  -4    5.30    1.60
   4 -17  -4    2.30    2.10
  -4 -17   4    0.90    1.30
  -4 -17   4    2.30    2.20
   4 -17   4    2.60    2.00
  -4 -17  -4    0.30    2.10
   4 -17   4    0.00    1.70
  -4 -18   4    9.50    1.60
  -4 -18   4    8.90    2.40
   4 -18  -4    9.60    1.90
   4 -18  -4    7.50    2.50
   4 -18   4   11.40    2.30
   4 -18   4   10.90    2.00
  -4 -18  -4   10.10    2.40
  -4 -19   4    4.10    2.50
   4 -19  -4   -0.30    2.40
   4 -19  -4    2.00    1.80
  -4 -19   4    1.30    1.50
   4 -19   4    1.00    2.30
   4 -19   4   -0.80    1.90
  -4 -19  -4    1.50    2.40
   4 -20  -4    5.70    2.60
  -4 -20   4    4.90    2.70
   4 -20  -4    0.90    1.80
   4 -20   4    5.20    2.00
   4 -20   4    3.70    2.50
  -4 -20  -4    7.30    2.70
   4 -21  -4    3.90    2.90
  -4 -21   4    2.30    2.80
   4 -21  -4    1.20    1.90
  -4 -21  -4    4.80    2.80
   4 -21   4   -1.30    2.60
   4 -21   4    0.80    2.10
   5   0   4   50.09    2.80
  -5   0  -4   53.89    2.90
  -5   0   4   54.59    2.90
   5   0  -4   54.09    2.90
   5   1   4  691.13   31.30
   5   1   4  667.43   30.70
   5  -1  -4  681.53   30.80
  -5   1  -4  634.74   30.80
  -5  -1   4  614.34   30.80
  -5   1   4  665.33   30.80
  -5  -1  -4  651.83   30.70
   5   1  -4  644.24   30.80
  -5  -1  -4  631.14   30.70
   5  -1   4  652.23   30.80
   5  -2  -4  147.99    6.80
  -5  -2   4  141.29    6.80
   5   2   4  140.99    6.70
  -5  -2   4  141.99    6.90
  -5   2  -4  133.99    6.80
  -5  -2  -4  148.19    6.70
  -5   2   4  134.39    6.80
  -5  -2  -4  130.39    6.70
   5  -2   4  125.59    6.80
  -5  -2  -4  150.08    6.60
   5   2  -4  138.49    6.80
   5   3   4  146.89    7.50
  -5   3  -4  169.78    7.70
   5  -3  -4  148.89    7.60
  -5  -3   4  166.88    7.80
  -5  -3   4  165.68    7.60
  -5  -3   4  144.89    7.50
   5  -3   4  158.78    7.60
  -5   3   4  150.68    7.60
   5   3  -4  171.48    7.60
  -5  -3  -4  148.49    7.50
  -5  -3  -4  153.98    7.40
   5   4   4    1.30    0.50
  -5  -4   4    4.30    0.80
   5  -4  -4    3.10    0.90
  -5   4  -4    3.00    0.90
  -5  -4   4    2.90    0.60
  -5  -4   4    2.90    0.90
  -5   4   4    3.60    0.90
  -5  -4  -4    1.80    0.80
   5   4  -4    3.20    0.70
   5  -4   4    2.90    0.90
  -5  -4  -4    0.30    0.60
  -5  -5   4   42.80    2.30
  -5   5  -4   41.30    2.50
   5  -5  -4   38.40    2.40
  -5  -5   4   35.10    2.20
  -5   5   4   42.80    2.40
  -5  -5  -4   41.50    2.30
   5   5  -4   41.50    2.20
   5  -5   4   37.60    2.40
  -5  -6   4   20.60    1.70
  -5  -6   4   19.10    1.50
  -5  -6   4   16.60    1.40
  -5   6  -4   20.90    1.80
   5  -6  -4   19.40    1.70
  -5   6   4   19.30    1.70
  -5  -6  -4   20.10    1.60
   5  -6   4   18.60    1.70
   5  -6   4   21.00    1.40
   5   6  -4   20.60    1.40
  -5  -7   4  111.79    6.30
  -5  -7   4  136.29    6.40
  -5   7  -4  136.49    6.60
  -5  -7   4  134.99    6.40
   5  -7  -4  129.79    6.50
   5   7  -4  135.09    6.40
  -5   7   4  128.69    6.50
  -5  -7  -4  130.29    6.40
   5  -7   4  138.69    6.60
   5  -7   4  136.39    6.30
   5  -8  -4  118.79    6.10
  -5  -8   4  122.99    5.90
  -5  -8   4  122.69    6.00
  -5   8  -4  126.09    6.10
  -5  -8  -4  119.89    6.00
   5  -8   4  125.19    6.10
   5  -8   4  120.79    5.90
  -5   8   4  119.99    6.10
   5   8  -4  115.89    5.90
   5  -9  -4   27.80    2.20
  -5  -9   4   30.10    1.90
  -5  -9   4   26.50    2.20
  -5   9  -4   29.40    2.20
  -5  -9  -4   28.50    2.30
   5  -9   4   28.30    2.20
  -5   9   4   28.10    2.10
   5  -9   4   27.60    2.00
  -5 -10   4   39.40    2.50
  -5  10  -4   41.90    2.70
  -5 -10   4   41.90    2.70
   5 -10  -4   38.50    2.80
   5 -10  -4   42.90    2.80
   5 -10   4   40.50    2.50
  -5  10   4   40.00    2.70
   5 -10   4   46.90    2.80
  -5 -10  -4   38.30    2.80
  -5 -11   4   38.10    2.60
   5 -11  -4   31.40    2.50
   5 -11  -4   34.60    2.50
  -5  11  -4   30.10    2.50
  -5 -11   4   34.10    2.30
  -5  11   4   34.60    2.40
  -5 -11  -4   30.60    2.60
   5 -11   4   32.70    2.50
   5 -11   4   33.30    2.30
  -5 -12   4    5.80    1.10
  -5 -12   4    5.40    1.60
  -5  12  -4    1.10    1.30
   5 -12  -4    2.10    1.40
   5 -12  -4    5.00    1.50
  -5  12   4    3.40    1.10
   5 -12   4    4.80    1.40
  -5 -12  -4    5.00    1.60
   5 -12   4    4.70    1.30
  -5 -13   4   34.50    2.30
   5 -13  -4   31.30    2.80
  -5 -13   4   35.30    2.90
  -5  13  -4   26.10    2.60
   5 -13  -4   34.70    2.60
  -5 -13  -4   32.10    2.60
   5 -13   4   35.00    2.70
   5 -13   4   29.80    2.80
   5 -14  -4   11.10    1.70
  -5 -14   4   11.10    2.00
  -5 -14   4    8.90    1.30
   5 -14  -4   11.30    2.00
   5 -14   4    8.60    1.70
  -5 -14  -4    8.00    1.90
   5 -14   4    9.00    1.70
  -5 -15   4   52.19    3.10
   5 -15  -4   52.39    3.50
   5 -15  -4   51.29    3.80
  -5 -15   4   48.70    3.80
   5 -15   4   45.60    3.50
   5 -15   4   46.80    3.50
  -5 -15  -4   41.00    3.70
  -5 -16   4    3.10    2.00
   5 -16  -4    1.40    2.00
   5 -16  -4    1.70    1.60
  -5 -16   4    1.80    1.30
   5 -16   4    2.60    1.90
   5 -16   4    3.80    1.80
  -5 -16  -4    2.90    2.00
   5 -17  -4   23.30    2.70
  -5 -17   4   18.80    2.60
   5 -17  -4   17.00    2.20
   5 -17   4   22.60    2.50
   5 -17   4   18.40    2.30
  -5 -17  -4   16.70    2.70
   5 -18  -4    4.50    1.80
  -5 -18   4    1.60    2.30
   5 -18  -4    4.10    2.30
   5 -18   4    6.00    2.20
   5 -18   4    3.50    1.90
  -5 -18  -4   -2.40    2.20
   5 -19  -4   38.60    3.50
   5 -19  -4   37.00    2.90
  -5 -19   4   32.50    3.40
  -5 -19  -4   28.00    3.30
   5 -19   4   31.80    3.00
   5 -19   4   35.00    3.20
  -5 -20   4    2.30    2.70
   5 -20  -4   -2.20    1.90
   5 -20  -4    0.90    2.60
   5 -20   4   -3.40    2.40
   5 -20   4   -0.40    2.00
  -5 -20  -4    2.20    2.70
  -5 -21   4   15.90    3.10
   5 -21  -4   15.70    3.20
   5 -21  -4   10.30    2.20
   5 -21   4    8.00    2.40
   5 -21   4   12.20    2.90
  -5 -21  -4   11.00    3.10
   6   0   4   34.00    2.10
   6   0  -4   36.40    2.20
  -6   0  -4   35.90    2.20
  -6   0   4   34.90    2.10
   6   1   4    4.00    0.60
   6   1   4    1.70    0.80
   6  -1  -4    2.40    0.90
  -6   1  -4    3.40    0.90
  -6  -1   4    4.30    0.90
   6   1  -4    1.90    0.90
  -6   1   4    3.10    0.90
   6  -1   4    3.30    0.90
  -6  -1  -4    3.70    0.90
  -6   2  -4    3.90    1.00
   6  -2  -4    3.70    0.90
   6   2   4    2.90    0.80
  -6  -2   4    4.10    0.80
  -6  -2   4    4.20    0.90
  -6   2   4    3.30    0.90
  -6  -2  -4    2.70    0.70
   6  -2   4    3.20    1.00
   6   2  -4    3.20    0.90
  -6  -2  -4    3.30    0.80
  -6  -3   4    4.70    0.90
   6  -3  -4    2.90    1.00
  -6   3  -4    4.00    1.00
   6   3   4    3.00    0.70
  -6  -3   4    5.60    0.90
   6  -3   4    2.90    1.00
  -6  -3  -4    2.50    0.70
  -6   3   4    2.80    0.90
  -6  -3  -4    5.20    0.80
   6   3  -4    5.70    0.90
  -6  -3  -4    1.90    0.80
  -6  -4   4  102.69    5.60
  -6  -4   4  120.39    5.60
   6  -4  -4  113.59    5.70
  -6  -4   4  115.29    5.80
   6   4   4  109.09    5.50
  -6   4  -4  116.59    5.70
  -6  -4  -4  113.99    5.60
   6   4  -4  118.89    5.60
  -6   4   4  115.79    5.70
   6  -4   4  114.99    5.70
  -6  -4  -4  116.39    5.50
  -6  -5   4    1.40    0.60
   6  -5  -4    2.50    1.00
  -6   5  -4    3.30    1.00
  -6  -5   4    3.10    0.80
  -6  -5   4    0.60    1.00
  -6  -5  -4    3.10    0.90
  -6   5   4    1.50    1.00
   6   5  -4    1.60    0.70
  -6  -5  -4    1.80    0.70
  -6  -5  -4   -0.20    0.30
   6  -5   4    1.70    1.00
   6  -6  -4  227.98   11.00
  -6   6  -4  234.98   11.00
  -6  -6   4  238.38   10.90
  -6  -6   4  197.38   10.80
  -6  -6  -4  236.58   10.70
   6  -6   4  229.38   11.00
   6   6  -4  226.38   10.80
  -6   6   4  226.48   11.00
  -6   7  -4    4.80    1.20
  -6  -7   4    6.20    1.00
  -6  -7   4    6.80    0.80
   6  -7  -4    4.90    1.20
  -6  -7   4    6.70    1.20
   6  -7   4    3.60    1.20
   6   7  -4    7.30    0.90
  -6   7   4    6.90    1.20
  -6  -7  -4    4.90    1.20
  -6  -8   4   19.80    1.50
  -6   8  -4   20.90    1.70
  -6  -8   4   19.10    1.70
   6  -8  -4   16.70    1.60
   6  -8   4   18.30    1.60
   6  -8   4   21.00    1.70
  -6  -8  -4   21.00    1.70
  -6   8   4   18.40    1.60
   6   8  -4   18.80    1.40
   6  -9  -4   20.30    1.70
  -6  -9   4   20.30    1.60
  -6  -9   4   16.60    1.70
  -6   9  -4   18.90    1.70
   6  -9   4   18.90    1.70
  -6  -9  -4   17.10    1.70
   6  -9   4   16.20    1.70
  -6   9   4   17.10    1.60
   6 -10  -4    8.90    1.40
  -6 -10   4    9.60    1.10
  -6  10  -4    8.80    1.40
  -6 -10   4    9.20    1.50
  -6  10   4    8.50    1.40
   6 -10   4    8.30    1.40
  -6 -10  -4    9.70    1.50
   6 -10   4    7.00    1.20
   6 -11  -4   11.50    1.50
  -6  11  -4   10.20    1.50
   6 -11  -4    9.70    1.60
  -6 -11   4    9.00    1.20
  -6 -11   4   10.60    1.60
  -6  11   4   12.80    1.50
  -6 -11  -4    9.40    1.70
   6 -11   4   10.20    1.60
   6 -11   4   10.80    1.40
   6 -12  -4    1.30    1.40
   6 -12  -4    1.50    1.40
  -6 -12   4    3.00    1.60
  -6  12  -4    3.20    1.40
  -6 -12   4    0.80    1.10
  -6 -12  -4    0.70    1.50
   6 -12   4    2.20    1.20
  -6  12   4    0.60    1.20
   6 -12   4    1.40    1.40
   6 -13  -4   22.70    2.20
  -6  13  -4   18.10    2.00
  -6 -13   4   23.60    2.30
   6 -13  -4   25.50    2.10
  -6 -13   4   24.00    1.80
   6 -13   4   22.90    2.00
   6 -13   4   22.50    2.10
  -6 -13  -4   20.50    2.20
   6 -14  -4   11.20    1.80
  -6 -14   4   11.70    2.10
   6 -14  -4   10.60    2.00
  -6 -14   4   12.00    1.50
   6 -14   4   13.10    1.90
   6 -14   4   11.20    1.80
  -6 -14  -4    9.60    2.00
   6 -15  -4   -0.50    1.80
  -6 -15   4    4.50    1.90
   6 -15  -4    0.30    1.60
  -6 -15  -4    2.60    1.90
   6 -15   4    0.40    1.60
   6 -15   4    3.70    1.70
   6 -16  -4   -0.90    1.70
  -6 -16   4   -0.90    1.30
   6 -16  -4   -2.80    1.90
  -6 -16   4    2.00    2.00
  -6 -16  -4   -1.20    2.00
   6 -16   4   -2.00    1.70
   6 -16   4    2.30    1.80
  -6 -17   4   12.40    2.40
   6 -17  -4   12.00    2.10
   6 -17  -4    7.90    2.30
  -6 -17  -4   12.60    2.50
   6 -17   4   13.30    2.20
   6 -17   4    9.90    2.10
   6 -18  -4   -1.50    1.80
  -6 -18   4    3.60    2.30
   6 -18  -4    3.70    2.30
   6 -18   4    2.20    2.00
  -6 -18  -4    0.70    2.30
   6 -18   4   -1.00    2.10
   6 -19  -4    1.30    1.90
   6 -19  -4    2.80    2.50
  -6 -19   4   -0.40    2.40
   6 -19   4    0.40    2.30
  -6 -19  -4    0.50    2.30
   6 -19   4    5.20    2.10
   6 -20  -4   -2.50    2.60
  -6 -20   4    2.50    2.70
   6 -20  -4   -1.50    2.00
  -6 -20  -4   -2.30    2.60
   6 -20   4    0.50    2.10
   6 -20   4   -0.70    2.30
   6 -21  -4    3.20    2.90
  -6 -21   4    3.20    2.80
   6 -21  -4    6.00    2.30
   6 -21   4   10.00    2.40
  -6 -21  -4    5.70    2.90
  -7   0  -4  190.78    9.70
   7   0  -4  203.18    9.70
  -7   0  -4  202.48    9.70
   7   0   4  206.18    9.70
  -7   0   4  200.48    9.70
   7  -1  -4  274.17   12.70
  -7   1  -4  262.47   12.70
   7   1   4  267.47   12.70
  -7  -1  -4  269.17   12.70
  -7   1   4  270.17   12.70
   7  -1   4  257.57   12.70
   7   1  -4  261.87   12.70
   7  -2  -4  262.27   12.40
  -7   2  -4  264.67   12.40
  -7  -2   4  256.37   12.60
   7   2   4  262.47   12.30
  -7  -2   4  263.97   12.40
  -7  -2  -4  267.47   12.40
   7  -2   4  264.97   12.40
  -7   2   4  259.37   12.40
  -7  -2  -4  230.78   12.30
   7   2  -4  260.77   12.40
  -7   3  -4  526.25   24.20
  -7  -3   4  527.35   24.70
  -7  -3   4  523.75   24.10
   7  -3  -4  510.95   24.20
   7   3   4  509.15   24.10
  -7  -3  -4  525.55   24.10
   7   3  -4  508.85   24.10
  -7  -3  -4  459.95   24.10
   7  -3   4  523.75   24.20
  -7   3   4  504.35   24.20
  -7  -3  -4  496.15   23.50
  -7   4  -4   21.00    1.90
  -7  -4   4   22.20    1.70
  -7  -4   4   18.00    1.50
  -7  -4   4   22.10    1.70
   7  -4  -4   19.60    1.60
   7   4   4   18.90    1.40
   7   4  -4   20.80    1.60
  -7  -4  -4   23.30    1.60
  -7   4   4   21.10    1.80
  -7  -4  -4   15.00    1.30
  -7  -4  -4   17.40    1.50
   7  -4   4   18.80    1.60
  -7  -5   4  121.69    6.50
   7  -5  -4  130.69    6.40
  -7  -5   4  134.69    6.30
  -7   5  -4  129.49    6.40
  -7  -5   4  114.09    6.20
   7   5   4  123.29    6.10
  -7  -5  -4  132.99    6.20
   7   5  -4  130.29    6.20
  -7  -5  -4  128.39    6.20
  -7   5   4  135.39    6.40
   7  -5   4  122.19    6.40
  -7  -6   4   32.50    2.00
  -7  -6   4   25.00    1.80
  -7   6  -4   28.40    2.30
   7  -6  -4   30.70    2.30
   7   6  -4   31.10    1.90
   7  -6   4   29.20    2.30
  -7   6   4   30.90    2.30
  -7  -6  -4   27.40    1.80
  -7  -6  -4   29.80    2.10
  -7  -7   4  217.28    9.90
  -7  -7   4  177.38    9.90
  -7   7  -4  213.98   10.10
   7  -7  -4  207.78   10.10
   7   7  -4  201.88    9.90
  -7  -7  -4  210.68    9.80
   7  -7   4  213.18   10.10
  -7   7   4  212.88   10.10
  -7  -8   4   11.00    1.00
  -7  -8   4   11.60    1.50
   7  -8  -4   11.60    1.40
  -7   8  -4   10.90    1.50
  -7  -8   4   11.70    1.20
  -7   8   4   11.80    1.50
   7  -8   4   11.00    1.50
  -7  -8  -4   12.00    1.50
   7   8  -4   12.40    1.00
   7  -9  -4   78.09    4.40
  -7   9  -4   84.79    4.50
  -7  -9   4   88.79    4.50
  -7  -9   4   84.49    4.20
  -7   9   4   82.49    4.50
   7  -9   4   77.59    4.20
   7  -9   4   80.39    4.50
  -7  -9  -4   80.29    4.40
  -7 -10   4   10.90    1.30
   7 -10  -4   12.30    1.60
  -7  10  -4    7.90    1.50
  -7 -10   4    8.70    1.60
  -7  10   4   12.10    1.50
  -7 -10  -4   10.90    1.60
   7 -10   4    9.90    1.60
   7 -10   4   11.50    1.30
   7 -11  -4   52.29    3.40
   7 -11  -4   51.09    3.40
  -7  11  -4   51.59    3.40
  -7 -11   4   52.39    3.50
  -7 -11   4   52.69    3.10
   7 -11   4   51.19    3.40
  -7 -11  -4   53.59    3.50
   7 -11   4   51.49    3.10
  -7  11   4   55.49    3.30
  -7 -12   4    4.20    1.20
   7 -12  -4    3.20    1.50
   7 -12  -4    2.60    1.50
  -7 -12   4    3.40    1.70
  -7  12  -4    1.80    1.50
  -7 -12  -4    4.40    1.60
   7 -12   4    3.40    1.40
  -7  12   4    2.10    1.40
   7 -12   4    2.30    1.50
   7 -13  -4    3.90    1.60
  -7 -13   4    2.50    1.20
  -7  13  -4    1.90    1.50
  -7 -13   4    2.50    1.70
   7 -13  -4    0.80    1.50
   7 -13   4    1.40    1.60
  -7 -13  -4    0.90    1.70
   7 -13   4    4.10    1.50
   7 -14  -4   66.59    4.10
   7 -14  -4   63.99    4.00
  -7 -14   4   65.89    4.10
  -7 -14   4   60.19    3.60
  -7 -14  -4   53.99    4.10
   7 -14   4   65.59    3.90
   7 -14   4   53.69    4.00
   7 -15  -4    9.80    1.90
  -7 -15   4    9.90    2.20
   7 -15  -4    6.40    2.00
  -7 -15  -4    4.20    2.00
   7 -15   4    8.20    1.80
   7 -15   4    9.50    2.00
  -7 -16   4   15.80    2.50
   7 -16  -4   19.10    2.60
   7 -16  -4   21.80    2.30
   7 -16   4   20.80    2.40
  -7 -16  -4   16.10    2.50
   7 -16   4   22.80    2.40
   7 -17  -4    2.40    2.10
   7 -17  -4    2.20    1.90
  -7 -17   4    2.20    2.20
  -7 -17  -4    3.70    2.20
   7 -17   4    3.20    2.00
   7 -17   4    4.40    2.00
   7 -18  -4   22.80    2.80
  -7 -18   4   18.80    2.80
   7 -18  -4   18.50    2.40
   7 -18   4   18.10    2.50
   7 -18   4   16.20    2.50
  -7 -18  -4   14.50    2.80
  -7 -19   4    4.40    2.50
   7 -19  -4    0.30    2.00
   7 -19  -4    3.50    2.40
   7 -19   4    3.80    2.30
   7 -19   4    4.30    2.10
  -7 -19  -4    5.80    2.50
   7 -20  -4   11.40    2.40
   7 -20  -4    9.20    2.90
  -7 -20   4   11.90    3.00
   7 -20   4   11.30    2.40
  -7 -20  -4    8.70    2.90
   7 -20   4   11.70    2.80
   7 -21  -4   -1.90    2.80
  -7 -21   4    2.00    2.90
   7 -21  -4    3.30    2.40
   7 -21   4   -0.70    2.30
  -7 -21  -4    2.70    2.90
   8   0  -4   19.90    1.80
  -8   0  -4   21.10    1.20
  -8   0   4   25.20    1.80
   8   0   4   17.40    1.50
  -8   0  -4   18.40    1.80
   8  -1  -4   25.20    2.00
  -8  -1   4   24.00    1.90
  -8   1  -4   25.80    2.00
   8   1   4   26.20    1.90
  -8   1   4   25.90    2.00
   8   1  -4   27.00    2.00
  -8  -1  -4   26.10    2.00
   8  -1   4   25.40    1.90
   8  -2  -4    8.90    1.20
  -8  -2   4   13.00    1.20
  -8   2  -4   11.00    1.30
   8   2   4    7.80    1.10
  -8  -2  -4    7.90    1.10
  -8   2   4    8.00    1.20
   8  -2   4   11.50    1.20
   8   2  -4    9.40    1.20
   8   3   4    2.70    0.90
  -8  -3   4    6.20    1.10
  -8  -3   4    6.20    1.10
  -8   3  -4    3.80    1.20
   8  -3  -4    4.80    1.20
   8  -3   4    4.20    1.10
  -8  -3  -4    2.70    0.80
  -8  -3  -4    2.20    1.00
  -8   3   4    3.30    1.10
   8   3  -4    4.10    1.00
  -8   4  -4    3.10    1.20
   8   4   4   -0.80    0.80
  -8  -4   4    0.60    1.00
  -8  -4   4    3.10    1.10
   8  -4  -4   -0.30    1.10
  -8  -4  -4   -0.30    0.90
  -8   4   4    2.10    1.10
  -8  -4  -4   -0.50    0.70
  -8  -4  -4    1.60    0.90
   8   4  -4    2.90    1.00
   8  -4   4    1.40    1.10
  -8   5  -4  132.59    6.60
   8   5   4  128.89    6.30
  -8  -5   4  126.19    6.60
   8  -5  -4  134.49    6.50
  -8  -5   4  143.49    6.50
  -8  -5   4  114.49    6.30
  -8  -5  -4  142.39    6.30
  -8  -5  -4  111.49    6.30
  -8   5   4  136.69    6.50
   8   5  -4  124.19    6.30
   8  -5   4  129.09    6.50
  -8  -5  -4  132.29    6.40
  -8  -6   4   58.39    3.00
  -8   6  -4   55.09    3.30
  -8  -6   4   45.50    2.80
   8  -6  -4   53.79    3.20
   8  -6   4   47.40    3.20
  -8  -6  -4   52.59    2.90
  -8  -6  -4   55.49    3.10
   8   6  -4   53.19    2.90
  -8   6   4   56.19    3.20
   8  -7  -4   13.20    1.50
  -8   7  -4   15.10    1.60
  -8  -7   4   10.80    1.10
  -8  -7   4   11.30    1.30
   8  -7   4   12.70    1.50
  -8  -7  -4   12.60    1.10
  -8  -7  -4   11.30    1.10
   8   7  -4   12.60    1.10
  -8  -7  -4   11.20    1.50
  -8   7   4   12.20    1.50
  -8  -8   4   15.10    1.30
  -8   8  -4   16.50    1.80
   8  -8  -4   16.60    1.70
  -8  -8   4   19.70    1.80
   8  -8   4   16.80    1.80
  -8   8   4   17.90    1.70
   8   8  -4   16.70    1.40
  -8  -8  -4   18.20    1.70
  -8   9  -4    2.20    1.30
   8  -9  -4   -0.30    1.30
  -8  -9   4    4.00    1.10
  -8  -9   4    0.80    0.70
  -8   9   4    0.80    1.30
  -8  -9  -4    0.80    1.30
   8  -9   4    1.60    1.40
   8  -9   4    3.30    1.00
   8 -10  -4   30.70    2.60
  -8 -10   4   30.30    2.20
  -8  10  -4   28.70    2.40
  -8 -10   4   28.50    2.60
  -8 -10  -4   30.40    2.60
  -8  10   4   29.40    2.50
   8 -10   4   27.10    2.30
   8 -10   4   28.30    2.20
   8 -11  -4    0.90    1.40
  -8 -11   4    4.30    1.60
  -8  11  -4    2.50    1.50
  -8 -11   4    1.60    1.20
  -8  11   4    0.60    1.40
  -8 -11  -4    2.70    1.60
   8 -11   4    3.00    1.40
   8 -11   4    3.20    1.20
   8 -12  -4   40.30    3.00
  -8 -12   4   36.20    2.60
  -8  12  -4   38.30    3.10
   8 -12  -4   35.50    3.00
  -8 -12   4   40.90    3.10
   8 -12   4   38.50    2.70
  -8  12   4   36.80    2.90
  -8 -12  -4   37.00    3.20
   8 -12   4   38.30    3.00
  -8  13  -4   25.10    2.40
  -8 -13   4   24.10    2.20
   8 -13  -4   22.90    2.30
  -8 -13   4   21.60    2.40
   8 -13  -4   25.00    2.40
  -8 -13  -4   22.90    2.40
   8 -13   4   23.90    2.20
   8 -13   4   22.60    2.40
   8 -14  -4   10.60    1.90
  -8 -14   4    6.70    1.40
   8 -14  -4    8.00    1.90
  -8 -14   4    8.10    2.10
  -8 -14  -4    4.20    2.00
   8 -14   4    8.60    2.00
   8 -14   4    8.40    1.70
   8 -15  -4    8.50    2.10
  -8 -15   4   10.20    2.20
   8 -15  -4   11.80    2.00
  -8 -15  -4    8.80    2.10
   8 -15   4    5.10    2.00
   8 -15   4   12.70    2.00
   8 -16  -4    1.50    2.00
   8 -16  -4    2.90    1.90
  -8 -16   4    3.10    2.10
  -8 -16  -4    1.80    2.10
   8 -16   4    3.70    1.90
   8 -16   4    2.30    2.00
  -8 -17   4    4.60    2.30
   8 -17  -4    0.40    1.90
   8 -17  -4    4.30    2.30
  -8 -17  -4    3.90    2.20
   8 -17   4    2.40    2.00
   8 -17   4    4.20    2.00
  -8 -18   4    0.60    2.40
   8 -18  -4    0.40    2.30
   8 -18  -4   -0.10    2.10
   8 -18   4   -0.60    2.00
   8 -18   4    2.90    2.10
  -8 -18  -4    1.80    2.30
  -8 -19   4   -4.00    2.40
   8 -19  -4   -2.70    2.40
   8 -19  -4    0.90    2.10
   8 -19   4    2.90    2.20
  -8 -19  -4    0.30    2.50
   8 -19   4    4.40    2.30
   8 -20  -4    5.90    2.30
  -8 -20   4    6.80    2.90
   8 -20  -4    1.50    2.70
   8 -20   4    2.50    2.40
   8 -20   4    3.40    2.40
  -8 -20  -4    1.80    2.70
  -9   0   4  832.92   39.30
  -9   0  -4  832.42   40.00
  -9   0  -4  825.02   39.30
   9   0   4  839.42   39.30
   9   0  -4  838.62   39.30
   9   1   4  131.29    6.50
  -9  -1   4  126.49    6.50
   9  -1  -4  126.89    6.50
  -9   1  -4  132.89    6.60
  -9   1   4  130.69    6.60
  -9  -1  -4  130.19    6.50
   9  -1   4  135.79    6.60
   9   1  -4  128.09    6.50
  -9  -2   4  855.01   40.20
   9   2   4  873.01   40.20
  -9   2  -4  839.42   40.30
   9  -2  -4  859.11   40.20
  -9  -2   4  834.22   41.10
   9   2  -4  846.32   40.20
   9  -2   4  849.02   40.20
  -9   2   4  848.92   40.30
  -9  -2  -4  872.61   40.20
   9  -3  -4   82.79    4.30
   9   3   4   76.69    4.10
  -9  -3   4   80.89    4.30
  -9  -3   4   77.49    4.20
  -9   3  -4   75.49    4.30
   9   3  -4   77.59    4.20
   9  -3   4   76.59    4.30
  -9  -3  -4   78.59    4.20
  -9   3   4   78.99    4.30
  -9  -4   4  766.32   37.60
   9   4   4  773.12   36.70
   9  -4  -4  807.62   36.90
  -9   4  -4  797.22   36.90
   9   4  -4  789.72   36.80
  -9  -4  -4  683.43   36.70
  -9  -4  -4  799.92   36.80
   9  -4   4  783.92   36.80
  -9   4   4  820.02   36.90
  -9   5  -4   11.70    1.60
   9   5   4    9.30    1.10
  -9  -5  -4    9.00    1.20
   9  -5   4   10.10    1.50
  -9   6  -4  287.07   14.20
  -9  -6   4  302.27   14.10
   9  -6  -4  303.97   14.20
   9   6   4  284.97   13.90
  -9  -6  -4  296.27   13.80
   9   6  -4  278.17   14.00
  -9  -6  -4  305.37   14.00
   9  -6   4  285.07   14.20
  -9   6   4  299.67   14.20
  -9   7  -4    8.40    1.50
  -9  -7   4   10.20    1.30
   9  -7  -4    8.40    1.50
  -9  -7   4    6.70    1.00
  -9  -7  -4    6.10    1.10
   9  -7   4    8.40    1.50
  -9   7   4    7.20    1.50
   9   7  -4    9.80    1.10
  -9  -7  -4    9.30    1.40
   9  -8  -4  101.99    5.10
  -9   8  -4  100.49    5.20
  -9  -8   4  107.29    5.00
  -9  -8   4   82.69    4.80
   9  -8   4  105.99    5.20
  -9  -8  -4   99.19    4.80
   9   8  -4   96.79    4.70
  -9  -8  -4   87.09    5.00
  -9  -8  -4   78.49    4.70
  -9   8   4   96.79    5.10
  -9  -9   4    8.80    1.40
   9  -9  -4    8.50    1.60
  -9   9  -4    6.60    1.60
  -9   9   4    9.50    1.60
  -9  -9  -4   10.00    1.60
   9   9  -4   10.10    1.00
   9  -9   4    8.10    1.60
  -9  10  -4   58.09    3.70
   9 -10  -4   52.99    3.70
  -9 -10   4   57.99    3.40
  -9 -10  -4   54.59    3.60
   9 -10   4   59.59    3.70
  -9  10   4   59.29    3.70
   9 -10   4   55.89    3.30
  -9 -11   4    3.70    1.60
  -9 -11   4    5.20    1.30
  -9  11  -4    5.20    1.60
   9 -11  -4    1.20    1.50
  -9 -11  -4    0.00    1.50
   9 -11   4    3.10    1.60
  -9  11   4    5.20    1.60
   9 -11   4    5.20    1.30
  -9 -12   4   37.10    2.60
  -9 -12   4   34.10    2.80
   9 -12  -4   35.20    3.00
  -9  12  -4   38.20    3.10
  -9  12   4   36.10    2.90
   9 -12   4   30.30    2.60
   9 -12   4   32.30    3.00
  -9 -12  -4   28.80    2.70
  -9 -13   4   21.60    1.90
  -9  13  -4   16.10    2.30
  -9 -13   4   18.50    2.40
   9 -13  -4   25.60    2.40
   9 -13  -4   21.10    2.30
   9 -13   4   20.30    2.00
  -9 -13  -4   15.60    2.30
   9 -13   4   22.80    2.30
   9 -14  -4   25.00    2.50
  -9 -14   4   22.10    1.90
   9 -14  -4   18.50    2.30
  -9 -14   4   19.60    2.40
  -9 -14  -4   19.80    2.50
   9 -14   4   18.10    2.40
   9 -14   4   20.50    2.20
   9 -15  -4   12.00    2.20
  -9 -15   4   11.20    2.30
   9 -15  -4   11.90    2.30
  -9 -15   4   14.10    1.70
   9 -15   4   16.40    2.00
   9 -15   4   12.20    2.20
  -9 -15  -4   12.40    2.40
   9 -16  -4    6.00    2.10
   9 -16  -4    2.60    2.10
  -9 -16   4    7.40    2.30
   9 -16   4    5.50    2.00
   9 -16   4    4.60    1.90
  -9 -16  -4    5.10    2.20
   9 -17  -4   24.50    2.90
   9 -17  -4   20.20    2.60
  -9 -17   4   24.00    2.90
  -9 -17  -4   22.20    2.80
   9 -17   4   21.30    2.70
   9 -17   4   22.30    2.60
  -9 -18   4    2.80    2.40
   9 -18  -4    1.90    2.10
   9 -18  -4    3.30    2.40
   9 -18   4    3.10    2.20
  -9 -18  -4    0.80    2.40
   9 -18   4    1.10    2.10
   9 -19  -4    2.20    2.50
   9 -19  -4    3.70    2.30
  -9 -19   4    1.30    2.70
   9 -19   4    4.10    2.40
  -9 -19  -4   -1.10    2.50
   9 -19   4    1.20    2.20
   9 -20  -4    2.90    2.70
   9 -20  -4   -0.80    2.30
  -9 -20   4    0.20    2.80
  -9 -20  -4    1.80    2.70
   9 -20   4    0.80    2.40
   9 -20   4   -3.10    2.30
 -10   0   4   77.49    4.30
  10   0   4   83.29    4.30
 -10   0  -4   80.39    4.00
 -10   0  -4   79.49    4.30
  10   0  -4   75.99    4.30
 -10   1  -4   65.79    3.40
  10   1   4   68.19    3.70
 -10  -1   4   65.19    3.80
 -10   1  -4   67.59    3.90
  10  -1  -4   70.19    3.80
 -10  -1  -4   64.99    3.80
 -10   1   4   67.39    3.80
  10  -1   4   67.49    3.80
  10   1  -4   67.79    3.80
 -10  -2   4   66.69    3.80
  10   2   4   69.19    3.70
  10  -2  -4   70.09    3.90
 -10   2  -4   66.99    3.90
 -10  -2   4   61.09    3.80
 -10   2   4   69.19    3.90
  10  -2   4   66.99    3.80
  10   2  -4   66.79    3.80
 -10  -2  -4   70.49    3.80
 -10  -3   4   14.80    1.50
 -10   3  -4   13.20    1.60
  10  -3  -4   13.70    1.60
 -10  -3   4   14.20    1.50
  10   3   4   10.90    1.30
 -10  -3  -4   12.50    1.40
  10   3  -4   13.70    1.40
 -10   3   4   14.10    1.60
  10  -3   4   12.20    1.50
  10   4   4   73.69    4.00
  10  -4  -4   75.39    4.30
 -10  -4   4   76.39    4.20
 -10  -4   4   80.79    4.20
 -10   4  -4   79.29    4.30
  10  -4   4   81.49    4.30
 -10   4   4   78.79    4.30
  10   4  -4   75.19    4.10
 -10  -4  -4   70.89    4.20
  10  -5  -4   47.70    2.80
 -10  -5   4   37.80    2.60
 -10   5  -4   35.70    2.90
  10   5   4   30.40    2.30
  10  -5   4   36.60    2.80
 -10  -5  -4   28.70    2.20
 -10   5   4   46.00    2.80
 -10  -5  -4   31.90    2.50
  10   5  -4   44.20    2.40
  10   6   4   42.10    2.40
 -10   6  -4   40.70    3.00
  10  -6  -4   44.80    3.00
  10   6  -4   43.90    2.60
  10  -6   4   41.80    2.90
 -10   6   4   44.10    3.00
 -10  -6  -4   37.60    2.40
 -10  -6  -4   42.60    2.70
 -10   7  -4   32.60    2.80
 -10  -7   4   37.90    2.60
 -10  -7   4   25.90    2.20
  10  -7  -4   37.40    2.80
 -10  -7  -4   36.20    2.40
 -10   7   4   37.60    2.80
  10  -7   4   35.60    2.80
 -10  -7  -4   40.60    2.60
  10   7  -4   33.70    2.20
 -10  -8   4   11.30    1.50
  10  -8  -4    8.00    1.60
 -10   8  -4   10.60    1.70
 -10   8   4    7.50    1.60
  10   8  -4   10.10    1.10
 -10  -8  -4    9.90    1.60
[truncated: 2,257,566 more chars]
