# Supplementary material for: Structural Diversity and Carbon Dioxide Sorption Selectivity of Zinc(II) Metal-Organic Frameworks Based on Bis(1,2,4-triazol-1-yl)methane and Terephthalic Acid
Source: Molecules. 2022 Oct 1;27(19):6481. doi: 10.3390/molecules27196481 (PMC9571910; doi:10.3390/molecules27196481)
Supplement: Supplementary file 1 [file molecules-27-06481-s001.zip › 3.cif]

data_tgs232_1
_audit_creation_date               2022-09-16
_audit_creation_method
;
Olex2 1.2
(compiled 2018.05.29 svn.r3508 for OlexSys, GUI svn.r5506)
;
_shelx_SHELXL_version_number       '2017/1'
_audit_contact_author_address      ?
_audit_contact_author_email        ?
_audit_contact_author_name         ''
_audit_contact_author_phone        ?
_publ_contact_author_id_orcid      ?
_publ_section_references
;
Dolomanov, O.V., Bourhis, L.J., Gildea, R.J, Howard, J.A.K. & Puschmann, H.
 (2009), J. Appl. Cryst. 42, 339-341.

Sheldrick, G.M. (2015). Acta Cryst. A71, 3-8.

Sheldrick, G.M. (2015). Acta Cryst. C71, 3-8.
;
_chemical_name_common              ?
_chemical_name_systematic          ?
_chemical_formula_moiety           'C13 H10 N6 O4 Zn, 3[C3 H7 N O]'
_chemical_formula_sum              'C22 H31 N9 O7 Zn'
_chemical_formula_weight           598.9
_chemical_melting_point            ?
loop_
  _atom_type_symbol
  _atom_type_description
  _atom_type_scat_dispersion_real
  _atom_type_scat_dispersion_imag
  _atom_type_scat_source
 'C' 'C' 0.0033 0.0016 'International Tables Vol C Tables 4.2.6.8 and 6.1.1.4'
 'H' 'H' 0.0000 0.0000 'International Tables Vol C Tables 4.2.6.8 and 6.1.1.4'
 'N' 'N' 0.0061 0.0033 'International Tables Vol C Tables 4.2.6.8 and 6.1.1.4'
 'O' 'O' 0.0106 0.0060 'International Tables Vol C Tables 4.2.6.8 and 6.1.1.4'
 'Zn' 'Zn' 0.2839 1.4301 'International Tables Vol C Tables 4.2.6.8 and 6.1.1.4'

_shelx_space_group_comment
;
The symmetry employed for this shelxl refinement is uniquely defined
by the following loop, which should always be used as a source of
symmetry information in preference to the above space-group names.
They are only intended as comments.
;
_space_group_crystal_system        'monoclinic'
_space_group_IT_number             15
_space_group_name_H-M_alt          'C 1 2/c 1'
_space_group_name_Hall             '-C 2yc'
loop_
  _space_group_symop_operation_xyz
 'x, y, z'
 '-x, y, -z+1/2'
 'x+1/2, y+1/2, z'
 '-x+1/2, y+1/2, -z+1/2'
 '-x, -y, -z'
 'x, -y, z-1/2'
 '-x+1/2, -y+1/2, -z'
 'x+1/2, -y+1/2, z-1/2'

_cell_length_a                     23.893(3)
_cell_length_b                     16.604(3)
_cell_length_c                     17.746(3)
_cell_angle_alpha                  90
_cell_angle_beta                   124.479(7)
_cell_angle_gamma                  90
_cell_volume                       5803.7(14)
_cell_formula_units_Z              8
_cell_measurement_reflns_used      7752
_cell_measurement_temperature      298(2)
_cell_measurement_theta_max        22.45
_cell_measurement_theta_min        2.45
_shelx_estimated_absorpt_T_max     0.919
_shelx_estimated_absorpt_T_min     0.782
_exptl_absorpt_coefficient_mu      0.863
_exptl_absorpt_correction_T_max    0.7453
_exptl_absorpt_correction_T_min    0.6354
_exptl_absorpt_correction_type     multi-scan
_exptl_absorpt_process_details    
 'SADABS-2012/1 (Bruker,2012) was used for absorption correction. wR2(int) was 0.0691 before and 0.0495 after correction. The Ratio of minimum to maximum transmission is 0.8525. The \l/2 correction factor is 0.0015.'
_exptl_absorpt_special_details     ?
_exptl_crystal_colour              colourless
_exptl_crystal_colour_primary      colourless
_exptl_crystal_density_diffrn      1.371
_exptl_crystal_density_meas        .
_exptl_crystal_density_method      ?
_exptl_crystal_description         prism
_exptl_crystal_F_000               1536
_exptl_crystal_size_max            0.3
_exptl_crystal_size_mid            0.2
_exptl_crystal_size_min            0.1
_exptl_transmission_factor_max     ?
_exptl_transmission_factor_min     ?
_diffrn_reflns_av_R_equivalents    0.0577
_diffrn_reflns_av_unetI/netI       0.0413
_diffrn_reflns_Laue_measured_fraction_full  0.998
_diffrn_reflns_Laue_measured_fraction_max  0.998
_diffrn_reflns_limit_h_max         27
_diffrn_reflns_limit_h_min         -27
_diffrn_reflns_limit_k_max         19
_diffrn_reflns_limit_k_min         -19
_diffrn_reflns_limit_l_max         20
_diffrn_reflns_limit_l_min         -16
_diffrn_reflns_number              28348
_diffrn_reflns_point_group_measured_fraction_full  0.998
_diffrn_reflns_point_group_measured_fraction_max  0.998
_diffrn_reflns_theta_full          24.403
_diffrn_reflns_theta_max           24.403
_diffrn_reflns_theta_min           1.604
_diffrn_ambient_temperature        298(2)
_diffrn_detector                   CCD
_diffrn_detector_area_resol_mean   8.33
_diffrn_detector_type              'Bruker APEXII CCD area detector'
_diffrn_measured_fraction_theta_full  0.998
_diffrn_measured_fraction_theta_max  0.998
_diffrn_measurement_device         '\k-geometry diffractometer'
_diffrn_measurement_device_type    'Bruker APEX diffractometer'
_diffrn_measurement_method         '\w and \f scans'
_diffrn_radiation_monochromator    'graphite'
_diffrn_radiation_type             MoK\a
_diffrn_radiation_wavelength       0.71073
_diffrn_source                     'sealed tube'
_diffrn_special_details            ?
_diffrn_standards_interval_count   .
_diffrn_standards_interval_time    .
_diffrn_standards_number           .
_reflns_Friedel_coverage           0.000
_reflns_Friedel_fraction_full      .
_reflns_Friedel_fraction_max       .
_reflns_number_gt                  3441
_reflns_number_total               4771
_reflns_special_details
;
 Reflections were merged by SHELXL according to the crystal
 class for the calculation of statistics and refinement.
 
 Structure factors included contributions from the .fab file.
 
 _reflns_Friedel_fraction is defined as the number of unique
 Friedel pairs measured divided by the number that would be
 possible theoretically, ignoring centric projections and
 systematic absences.
;
_reflns_threshold_expression       'I > 2\s(I)'
_computing_cell_refinement         'Bruker SAINT'
_computing_data_collection         'Bruker APEX2'
_computing_data_reduction          'Bruker SAINT'
_computing_molecular_graphics      'Olex2 (Dolomanov et al., 2009)'
_computing_publication_material    'Olex2 (Dolomanov et al., 2009)'
_computing_structure_refinement    'ShelXL (Sheldrick, 2015)'
_computing_structure_solution      'ShelXT (Sheldrick, 2015)'
_refine_diff_density_max           0.871
_refine_diff_density_min           -0.638
_refine_diff_density_rms           0.115
_refine_ls_extinction_coef         .
_refine_ls_extinction_method       none
_refine_ls_goodness_of_fit_ref     1.032
_refine_ls_hydrogen_treatment      constr
_refine_ls_matrix_type             full
_refine_ls_number_parameters       239
_refine_ls_number_reflns           4771
_refine_ls_number_restraints       24
_refine_ls_R_factor_all            0.0846
_refine_ls_R_factor_gt             0.0668
_refine_ls_restrained_S_all        1.030
_refine_ls_shift/su_max            0.001
_refine_ls_shift/su_mean           0.000
_refine_ls_structure_factor_coef   Fsqd
_refine_ls_weighting_details      
 'w=1/[\s^2^(Fo^2^)+(0.1444P)^2^+10.0568P] where P=(Fo^2^+2Fc^2^)/3'
_refine_ls_weighting_scheme        calc
_refine_ls_wR_factor_gt            0.1997
_refine_ls_wR_factor_ref           0.2197
_refine_special_details            ?
_olex2_refinement_description
;
1. Fixed Uiso
 At 1.2 times of:
  All C(H) groups, All C(H,H) groups
2. Restrained distances
 O3-C13 \\sim O4-C13 \\sim O5-C14 \\sim O6-C14
 with sigma of 0.02
3. Uiso/Uaniso restraints and constraints
Uanis(C13) = Uanis(C14)
4. Rigid body (RIGU) restrains
 O3, O4, C6, C13
 with sigma for 1-2 distances of 0.004 and sigma for 1-3 distances of 0.004
5. Others
 Sof(O5)=Sof(O6)=Sof(C14)=1-FVAR(1)
 Sof(O3)=Sof(O4)=Sof(C13)=FVAR(1)
6.a Secondary CH2 refined with riding coordinates:
 C5(H5A,H5B)
6.b Aromatic/amide H refined with riding coordinates:
 C1(H1), C3(H3), C7(H7), C8(H8), C9(H9), C10(H10), C11(H11), C12(H12)
;
_atom_sites_solution_hydrogens     geom
_atom_sites_solution_primary       dual
_atom_sites_solution_secondary     ?
loop_
  _atom_site_label
  _atom_site_type_symbol
  _atom_site_fract_x
  _atom_site_fract_y
  _atom_site_fract_z
  _atom_site_U_iso_or_equiv
  _atom_site_adp_type
  _atom_site_occupancy
  _atom_site_site_symmetry_order
  _atom_site_calc_flag
  _atom_site_refinement_flags_posn
  _atom_site_refinement_flags_adp
  _atom_site_refinement_flags_occupancy
  _atom_site_disorder_assembly
  _atom_site_disorder_group
 Zn1 Zn 0.22725(3) 0.62358(3) 0.59977(4) 0.0432(3) Uani 1 1 d . . . . .
 O1 O 0.30506(17) 0.6885(2) 0.6945(3) 0.0571(10) Uani 1 1 d . . . . .
 O2 O 0.36054(18) 0.5768(2) 0.7089(3) 0.0605(10) Uani 1 1 d . . . . .
 O3 O 0.6733(5) 0.7555(8) 1.0122(11) 0.074(3) Uani 0.57(2) 1 d D U P A 1
 O4 O 0.6250(6) 0.8532(9) 1.0374(9) 0.090(4) Uani 0.57(2) 1 d D U P A 1
 O5 O 0.6632(7) 0.7837(10) 1.0370(10) 0.060(4) Uani 0.43(2) 1 d D . P A 2
 O6 O 0.6047(7) 0.8937(11) 0.9876(14) 0.105(6) Uani 0.43(2) 1 d D . P A 2
 N1 N 0.2338(2) 0.5746(3) 0.2489(3) 0.0491(10) Uani 1 1 d . . . . .
 N2 N 0.2167(2) 0.4743(3) 0.1598(3) 0.0493(10) Uani 1 1 d . . . . .
 N3 N 0.2436(2) 0.5918(3) 0.5039(3) 0.0530(11) Uani 1 1 d . . . . .
 N4 N 0.2600(2) 0.6017(3) 0.3958(3) 0.0548(12) Uani 1 1 d . . . . .
 N5 N 0.2905(3) 0.5304(3) 0.4403(4) 0.0774(16) Uani 1 1 d . . . . .
 N6 N 0.1659(2) 0.5634(4) 0.1971(4) 0.0815(18) Uani 1 1 d . . . . .
 C1 C 0.2626(3) 0.5201(3) 0.2268(4) 0.0514(13) Uani 1 1 d . . . . .
 H1 H 0.309148 0.514941 0.255009 0.062 Uiso 1 1 calc R . . . .
 C2 C 0.3595(2) 0.6487(3) 0.7296(3) 0.0465(12) Uani 1 1 d . . . . .
 C3 C 0.2343(3) 0.6365(3) 0.4352(3) 0.0488(13) Uani 1 1 d . . . . .
 H3 H 0.212255 0.685999 0.417749 0.059 Uiso 1 1 calc R . . . .
 C4 C 0.4251(2) 0.6883(3) 0.7999(4) 0.0493(13) Uani 1 1 d . . . . .
 C5 C 0.2666(3) 0.6301(3) 0.3250(4) 0.0585(14) Uani 1 1 d . . . . .
 H5A H 0.314245 0.634982 0.348460 0.070 Uiso 1 1 calc R . . . .
 H5B H 0.245868 0.682909 0.304734 0.070 Uiso 1 1 calc R . . . .
 C6 C 0.5488(3) 0.7595(5) 0.9302(4) 0.0696(18) Uani 1 1 d . U . . .
 C7 C 0.5467(3) 0.6843(4) 0.8997(4) 0.076(2) Uani 1 1 d . . . . .
 H7 H 0.587205 0.657099 0.921663 0.091 Uiso 1 1 calc R . . . .
 C8 C 0.4865(3) 0.6471(4) 0.8372(5) 0.0747(19) Uani 1 1 d . . . . .
 H8 H 0.486442 0.594324 0.819526 0.090 Uiso 1 1 calc R . . . .
 C9 C 0.2778(4) 0.5277(4) 0.5028(5) 0.0782(19) Uani 1 1 d . . . . .
 H9 H 0.291307 0.484891 0.543345 0.094 Uiso 1 1 calc R . . . .
 C10 C 0.4281(3) 0.7643(4) 0.8309(5) 0.087(2) Uani 1 1 d . . . . .
 H10 H 0.387882 0.792279 0.808789 0.104 Uiso 1 1 calc R . . . .
 C11 C 0.1577(3) 0.5045(4) 0.1432(4) 0.076(2) Uani 1 1 d . . . . .
 H11 H 0.115269 0.484749 0.097287 0.091 Uiso 1 1 calc R . . . .
 C12 C 0.4889(3) 0.8008(5) 0.8939(6) 0.104(3) Uani 1 1 d . . . . .
 H12 H 0.489549 0.853571 0.912055 0.125 Uiso 1 1 calc R . . . .
 C13 C 0.6221(8) 0.7882(10) 1.0008(10) 0.054(3) Uani 0.57(2) 1 d D U P A 1
 C14 C 0.6072(9) 0.8184(11) 0.9846(13) 0.054(3) Uani 0.43(2) 1 d D . P A 2

loop_
  _atom_site_aniso_label
  _atom_site_aniso_U_11
  _atom_site_aniso_U_22
  _atom_site_aniso_U_33
  _atom_site_aniso_U_23
  _atom_site_aniso_U_13
  _atom_site_aniso_U_12
 Zn1 0.0247(3) 0.0494(4) 0.0388(4) 0.0033(2) 0.0079(3) -0.0017(2)
 O1 0.0289(18) 0.062(2) 0.053(2) -0.0009(18) 0.0072(17) 0.0028(16)
 O2 0.036(2) 0.066(3) 0.057(2) -0.0083(19) 0.0131(18) -0.0068(17)
 O3 0.026(4) 0.071(7) 0.091(9) 0.005(5) 0.013(4) 0.003(4)
 O4 0.052(6) 0.113(8) 0.078(8) -0.039(6) 0.021(6) -0.016(6)
 O5 0.010(6) 0.074(10) 0.063(8) 0.001(7) 0.001(5) -0.006(6)
 O6 0.037(7) 0.107(12) 0.103(12) -0.029(9) -0.003(7) -0.027(7)
 N1 0.035(2) 0.057(3) 0.047(3) -0.011(2) 0.019(2) 0.0029(19)
 N2 0.029(2) 0.062(3) 0.046(2) -0.009(2) 0.0148(19) 0.0040(19)
 N3 0.040(2) 0.055(3) 0.053(3) 0.001(2) 0.020(2) 0.006(2)
 N4 0.057(3) 0.053(3) 0.048(3) -0.003(2) 0.025(2) 0.008(2)
 N5 0.094(4) 0.065(3) 0.069(3) 0.007(3) 0.044(3) 0.030(3)
 N6 0.038(3) 0.101(4) 0.074(4) -0.031(3) 0.013(3) 0.011(3)
 C1 0.033(3) 0.065(3) 0.049(3) -0.008(3) 0.019(2) -0.003(2)
 C2 0.035(3) 0.057(3) 0.035(3) 0.002(2) 0.012(2) 0.000(2)
 C3 0.040(3) 0.058(3) 0.039(3) 0.000(2) 0.017(2) 0.008(2)
 C4 0.028(2) 0.049(3) 0.047(3) -0.006(2) 0.007(2) -0.003(2)
 C5 0.064(4) 0.062(3) 0.051(3) -0.004(3) 0.033(3) -0.006(3)
 C6 0.031(3) 0.100(5) 0.055(4) -0.019(3) 0.010(3) -0.018(3)
 C7 0.023(3) 0.083(5) 0.076(4) 0.008(4) 0.000(3) 0.002(3)
 C8 0.034(3) 0.071(4) 0.085(5) 0.004(3) 0.013(3) 0.005(3)
 C9 0.099(5) 0.066(4) 0.069(4) 0.012(3) 0.047(4) 0.027(4)
 C10 0.029(3) 0.090(5) 0.111(6) -0.035(4) 0.022(3) 0.000(3)
 C11 0.035(3) 0.084(4) 0.073(4) -0.031(4) 0.010(3) 0.007(3)
 C12 0.045(4) 0.108(6) 0.141(7) -0.077(5) 0.042(4) -0.028(4)
 C13 0.026(6) 0.064(8) 0.041(6) 0.007(6) 0.000(5) 0.007(5)
 C14 0.026(6) 0.064(8) 0.041(6) 0.007(6) 0.000(5) 0.007(5)

_geom_special_details
;
 All esds (except the esd in the dihedral angle between two l.s. planes)
 are estimated using the full covariance matrix.  The cell esds are taken
 into account individually in the estimation of esds in distances, angles
 and torsion angles; correlations between esds in cell parameters are only
 used when they are defined by crystal symmetry.  An approximate (isotropic)
 treatment of cell esds is used for estimating esds involving l.s. planes.
;
loop_
  _geom_bond_atom_site_label_1
  _geom_bond_atom_site_label_2
  _geom_bond_distance
  _geom_bond_site_symmetry_2
  _geom_bond_publ_flag
 Zn1 O1 1.976(4) . ?
 Zn1 O3 2.417(14) 8_465 ?
 Zn1 O4 2.068(11) 8_465 ?
 Zn1 O5 2.006(14) 8_465 ?
 Zn1 O6 2.454(15) 8_465 ?
 Zn1 N2 2.036(4) 6_566 ?
 Zn1 N3 2.020(5) . ?
 Zn1 C13 2.558(14) 8_465 ?
 Zn1 C14 2.587(17) 8_465 ?
 O1 C2 1.265(6) . ?
 O2 C2 1.253(7) . ?
 O3 C13 1.246(11) . ?
 O4 C13 1.242(12) . ?
 O5 C14 1.257(12) . ?
 O6 C14 1.254(13) . ?
 N1 N6 1.350(6) . ?
 N1 C1 1.323(6) . ?
 N1 C5 1.446(7) . ?
 N2 C1 1.310(6) . ?
 N2 C11 1.361(7) . ?
 N3 C3 1.334(7) . ?
 N3 C9 1.349(8) . ?
 N4 N5 1.380(7) . ?
 N4 C3 1.298(7) . ?
 N4 C5 1.431(7) . ?
 N5 C9 1.305(8) . ?
 N6 C11 1.304(8) . ?
 C1 H1 0.9300 . ?
 C2 C4 1.492(7) . ?
 C3 H3 0.9300 . ?
 C4 C8 1.400(8) . ?
 C4 C10 1.363(8) . ?
 C5 H5A 0.9700 . ?
 C5 H5B 0.9700 . ?
 C6 C7 1.351(9) . ?
 C6 C12 1.375(10) . ?
 C6 C13 1.543(15) . ?
 C6 C14 1.520(19) . ?
 C7 H7 0.9300 . ?
 C7 C8 1.369(8) . ?
 C8 H8 0.9300 . ?
 C9 H9 0.9300 . ?
 C10 H10 0.9300 . ?
 C10 C12 1.375(8) . ?
 C11 H11 0.9300 . ?
 C12 H12 0.9300 . ?

loop_
  _geom_angle_atom_site_label_1
  _geom_angle_atom_site_label_2
  _geom_angle_atom_site_label_3
  _geom_angle
  _geom_angle_site_symmetry_1
  _geom_angle_site_symmetry_3
  _geom_angle_publ_flag
 O1 Zn1 O3 89.8(3) . 8_465 ?
 O1 Zn1 O4 127.7(5) . 8_465 ?
 O1 Zn1 O5 96.2(5) . 8_465 ?
 O1 Zn1 O6 150.4(5) . 8_465 ?
 O1 Zn1 N2 109.02(16) . 6_566 ?
 O1 Zn1 N3 108.74(18) . . ?
 O1 Zn1 C13 110.9(4) . 8_465 ?
 O1 Zn1 C14 123.9(4) . 8_465 ?
 O3 Zn1 O6 67.6(4) 8_465 8_465 ?
 O3 Zn1 C13 28.8(3) 8_465 8_465 ?
 O3 Zn1 C14 40.0(4) 8_465 8_465 ?
 O4 Zn1 O3 57.5(4) 8_465 8_465 ?
 O4 Zn1 O6 23.4(5) 8_465 8_465 ?
 O4 Zn1 C13 28.7(3) 8_465 8_465 ?
 O4 Zn1 C14 20.4(5) 8_465 8_465 ?
 O5 Zn1 N3 100.5(5) 8_465 . ?
 O5 Zn1 C14 28.3(4) 8_465 8_465 ?
 O6 Zn1 C14 28.6(3) 8_465 8_465 ?
 N2 Zn1 O3 145.2(4) 6_566 8_465 ?
 N2 Zn1 O4 88.3(3) 6_566 8_465 ?
 N2 Zn1 O6 83.5(4) 6_566 8_465 ?
 N2 Zn1 C13 116.9(3) 6_566 8_465 ?
 N2 Zn1 C14 107.5(5) 6_566 8_465 ?
 N3 Zn1 O3 87.8(4) . 8_465 ?
 N3 Zn1 O4 109.3(4) . 8_465 ?
 N3 Zn1 O6 89.9(6) . 8_465 ?
 N3 Zn1 N2 111.89(18) . 6_566 ?
 N3 Zn1 C13 98.9(4) . 8_465 ?
 N3 Zn1 C14 95.1(5) . 8_465 ?
 C13 Zn1 C14 13.1(3) 8_465 8_465 ?
 C2 O1 Zn1 110.1(3) . . ?
 C13 O3 Zn1 81.9(9) . 8_566 ?
 C13 O4 Zn1 98.1(9) . 8_566 ?
 N6 N1 C5 122.0(4) . . ?
 C1 N1 N6 109.3(4) . . ?
 C1 N1 C5 128.0(5) . . ?
 C1 N2 Zn1 130.5(3) . 6_565 ?
 C1 N2 C11 102.4(4) . . ?
 C11 N2 Zn1 126.9(4) . 6_565 ?
 C3 N3 Zn1 127.8(4) . . ?
 C3 N3 C9 102.4(5) . . ?
 C9 N3 Zn1 128.8(4) . . ?
 N5 N4 C5 120.0(5) . . ?
 C3 N4 N5 109.3(5) . . ?
 C3 N4 C5 130.3(5) . . ?
 C9 N5 N4 102.3(5) . . ?
 C11 N6 N1 103.0(4) . . ?
 N1 C1 H1 124.5 . . ?
 N2 C1 N1 110.9(4) . . ?
 N2 C1 H1 124.5 . . ?
 O1 C2 C4 118.8(5) . . ?
 O2 C2 O1 122.5(5) . . ?
 O2 C2 C4 118.6(4) . . ?
 N3 C3 H3 124.4 . . ?
 N4 C3 N3 111.1(5) . . ?
 N4 C3 H3 124.4 . . ?
 C8 C4 C2 120.2(5) . . ?
 C10 C4 C2 122.4(5) . . ?
 C10 C4 C8 117.4(5) . . ?
 N1 C5 H5A 109.7 . . ?
 N1 C5 H5B 109.7 . . ?
 N4 C5 N1 109.8(4) . . ?
 N4 C5 H5A 109.7 . . ?
 N4 C5 H5B 109.7 . . ?
 H5A C5 H5B 108.2 . . ?
 C7 C6 C12 118.8(5) . . ?
 C7 C6 C13 112.2(7) . . ?
 C7 C6 C14 131.4(9) . . ?
 C12 C6 C13 129.0(8) . . ?
 C12 C6 C14 108.3(9) . . ?
 C6 C7 H7 119.1 . . ?
 C6 C7 C8 121.7(6) . . ?
 C8 C7 H7 119.1 . . ?
 C4 C8 H8 119.9 . . ?
 C7 C8 C4 120.1(6) . . ?
 C7 C8 H8 119.9 . . ?
 N3 C9 H9 122.6 . . ?
 N5 C9 N3 114.8(6) . . ?
 N5 C9 H9 122.6 . . ?
 C4 C10 H10 119.1 . . ?
 C4 C10 C12 121.8(6) . . ?
 C12 C10 H10 119.1 . . ?
 N2 C11 H11 122.9 . . ?
 N6 C11 N2 114.3(5) . . ?
 N6 C11 H11 122.9 . . ?
 C6 C12 C10 120.1(7) . . ?
 C6 C12 H12 119.9 . . ?
 C10 C12 H12 119.9 . . ?
 O3 C13 Zn1 69.3(9) . 8_566 ?
 O3 C13 C6 123.8(10) . . ?
 O4 C13 Zn1 53.1(7) . 8_566 ?
 O4 C13 O3 122.4(13) . . ?
 O4 C13 C6 113.2(10) . . ?
 C6 C13 Zn1 163.0(10) . 8_566 ?
 O5 C14 C6 112.6(13) . . ?
 O6 C14 O5 118.9(15) . . ?
 O6 C14 C6 128.2(13) . . ?
 C6 C14 Zn1 161.8(11) . 8_566 ?

_smtbx_masks_special_details       ?
loop_
  _smtbx_masks_void_nr
  _smtbx_masks_void_average_x
  _smtbx_masks_void_average_y
  _smtbx_masks_void_average_z
  _smtbx_masks_void_volume
  _smtbx_masks_void_count_electrons
  _smtbx_masks_void_content
 1 -0.228 -0.671 -1.000 3349.0 866.1 ?

_shelx_res_file
;
TITL tgs232_1_a.res in C2/c
    tgs232_1.res
    created by SHELXL-2017/1 at 17:28:20 on 16-Sep-2022
REM Old TITL tgs232_1 in C2/c
REM SHELXT solution in C2/c
REM R1 0.236, Rweak 0.010, Alpha 0.067, Orientation as input
REM Formula found by SHELXT: C16 N4 O8 Zn
CELL 0.71073 23.8932 16.6045 17.7461 90 124.479 90
ZERR 8 0.0025 0.0025 0.0027 0 0.007 0
LATT 7
SYMM -X,+Y,0.5-Z
SFAC C H N O Zn
UNIT 104 80 48 32 8
SADI O3 C13 O4 C13 O5 C14 O6 C14
RIGU O3 O4 C6 C13
EADP C13 C14

L.S. 8
PLAN  20
SIZE 0.3 0.2 0.1
TEMP 25(2)
BOND $H
list 4
ABIN
fmap 2
acta
SHEL 999 0.86
OMIT -7 1 5
OMIT -3 5 1
OMIT -2 2 4
OMIT -5 1 4
OMIT 2 4 1
REM <olex2.extras>
REM <HklSrc "%.\\tgs232_1.hkl">
REM </olex2.extras>

WGHT    0.144400   10.056800
FVAR       0.16533   0.56606
ZN1   5    0.227247    0.623580    0.599771    11.00000    0.02473    0.04938 =
         0.03881    0.00330    0.00793   -0.00174
O1    4    0.305063    0.688494    0.694497    11.00000    0.02888    0.06231 =
         0.05328   -0.00085    0.00720    0.00284
O2    4    0.360537    0.576810    0.708891    11.00000    0.03636    0.06636 =
         0.05661   -0.00829    0.01307   -0.00680
PART 1
O3    4    0.673302    0.755451    1.012176    21.00000    0.02588    0.07110 =
         0.09067    0.00455    0.01295    0.00309
O4    4    0.625049    0.853207    1.037406    21.00000    0.05208    0.11344 =
         0.07777   -0.03871    0.02094   -0.01582
PART 0
PART 2
O5    4    0.663242    0.783675    1.036978   -21.00000    0.00982    0.07382 =
         0.06319    0.00110    0.00127   -0.00577
O6    4    0.604657    0.893676    0.987612   -21.00000    0.03659    0.10652 =
         0.10316   -0.02938   -0.00258   -0.02702
PART 0
N1    3    0.233793    0.574566    0.248886    11.00000    0.03504    0.05732 =
         0.04745   -0.01052    0.01878    0.00291
N2    3    0.216699    0.474305    0.159803    11.00000    0.02928    0.06187 =
         0.04586   -0.00852    0.01481    0.00404
N3    3    0.243623    0.591832    0.503901    11.00000    0.04003    0.05549 =
         0.05320    0.00064    0.02017    0.00633
N4    3    0.259960    0.601705    0.395776    11.00000    0.05700    0.05281 =
         0.04754   -0.00307    0.02537    0.00765
N5    3    0.290475    0.530378    0.440256    11.00000    0.09415    0.06515 =
         0.06928    0.00679    0.04400    0.03021
N6    3    0.165908    0.563418    0.197090    11.00000    0.03821    0.10133 =
         0.07394   -0.03126    0.01320    0.01117
C1    1    0.262586    0.520068    0.226783    11.00000    0.03266    0.06526 =
         0.04907   -0.00830    0.01875   -0.00316
AFIX  43
H1    2    0.309148    0.514941    0.255009    11.00000   -1.20000
AFIX   0
C2    1    0.359544    0.648720    0.729601    11.00000    0.03530    0.05657 =
         0.03477    0.00154    0.01207   -0.00025
C3    1    0.234283    0.636462    0.435164    11.00000    0.03959    0.05820 =
         0.03911    0.00043    0.01653    0.00761
AFIX  43
H3    2    0.212255    0.685999    0.417749    11.00000   -1.20000
AFIX   0
C4    1    0.425083    0.688257    0.799890    11.00000    0.02807    0.04941 =
         0.04713   -0.00562    0.00733   -0.00332
C5    1    0.266563    0.630118    0.325013    11.00000    0.06370    0.06194 =
         0.05098   -0.00411    0.03316   -0.00585
AFIX  23
H5A   2    0.314245    0.634982    0.348460    11.00000   -1.20000
H5B   2    0.245868    0.682909    0.304734    11.00000   -1.20000
AFIX   0
C6    1    0.548803    0.759513    0.930191    11.00000    0.03051    0.09995 =
         0.05504   -0.01931    0.01031   -0.01789
C7    1    0.546709    0.684295    0.899670    11.00000    0.02307    0.08288 =
         0.07558    0.00794    0.00049    0.00247
AFIX  43
H7    2    0.587205    0.657099    0.921663    11.00000   -1.20000
AFIX   0
C8    1    0.486523    0.647072    0.837209    11.00000    0.03402    0.07127 =
         0.08496    0.00370    0.01332    0.00506
AFIX  43
H8    2    0.486442    0.594324    0.819526    11.00000   -1.20000
AFIX   0
C9    1    0.277813    0.527690    0.502755    11.00000    0.09926    0.06585 =
         0.06867    0.01197    0.04710    0.02663
AFIX  43
H9    2    0.291307    0.484891    0.543345    11.00000   -1.20000
AFIX   0
C10   1    0.428069    0.764327    0.830877    11.00000    0.02939    0.08992 =
         0.11121   -0.03490    0.02150    0.00031
AFIX  43
H10   2    0.387882    0.792279    0.808789    11.00000   -1.20000
AFIX   0
C11   1    0.157749    0.504480    0.143180    11.00000    0.03460    0.08394 =
         0.07318   -0.03090    0.00955    0.00659
AFIX  43
H11   2    0.115269    0.484749    0.097287    11.00000   -1.20000
AFIX   0
C12   1    0.488915    0.800838    0.893924    11.00000    0.04520    0.10845 =
         0.14140   -0.07722    0.04178   -0.02766
AFIX  43
H12   2    0.489549    0.853571    0.912055    11.00000   -1.20000
AFIX   0
PART 1
C13   1    0.622137    0.788164    1.000823    21.00000    0.02611    0.06399 =
         0.04106    0.00659   -0.00002    0.00712
PART 0
PART 2
C14   1    0.607223    0.818415    0.984644   -21.00000    0.02611    0.06399 =
         0.04106    0.00659   -0.00002    0.00712
HKLF 4


REM  tgs232_1_a.res in C2/c
REM R1 =  0.0668 for    3441 Fo > 4sig(Fo)  and  0.0846 for all    4771 data
REM    239 parameters refined using     24 restraints

END

WGHT      0.1446     10.0452

REM Highest difference peak  0.871,  deepest hole -0.638,  1-sigma level  0.115
Q1    1   0.2243  0.5742  0.6306  11.00000  0.05    0.87
Q2    1   0.2252  0.6337  0.6415  11.00000  0.05    0.55
Q3    1   0.2261  0.5823  0.5698  11.00000  0.05    0.43
Q4    1   0.2290  0.6541  0.5586  11.00000  0.05    0.41
Q5    1   0.2444  0.5981  0.2021  11.00000  0.05    0.40
Q6    1   0.7154  0.7174  0.9897  11.00000  0.05    0.34
Q7    1   0.2666  0.5392  0.1286  11.00000  0.05    0.33
Q8    1   0.3623  0.6127  0.7319  11.00000  0.05    0.32
Q9    1   0.2701  0.6918  0.2714  11.00000  0.05    0.31
Q10   1   0.2733  0.7450  0.6469  11.00000  0.05    0.29
Q11   1   0.2350  0.6155  0.4751  11.00000  0.05    0.27
Q12   1   0.5000  0.7299  0.7500  10.50000  0.05    0.27
Q13   1   0.2781  0.6693  0.5342  11.00000  0.05    0.27
Q14   1   0.2744  0.5572  0.1655  11.00000  0.05    0.26
Q15   1   0.2718  0.5311  0.3965  11.00000  0.05    0.24
Q16   1   0.2633  0.7025  0.1236  11.00000  0.05    0.24
Q17   1   0.1293  0.4986  0.0528  11.00000  0.05    0.24
Q18   1   0.7105  0.7774  1.0046  11.00000  0.05    0.23
Q19   1   0.4859  0.8259  0.8433  11.00000  0.05    0.23
Q20   1   0.5069  0.4182  0.8791  11.00000  0.05    0.22
;
_shelx_res_checksum                38087
_shelx_hkl_file
;
   1  -1   0    2.50    0.40
   1  -1   0    1.30    0.30
  -1   1   0    3.40    0.40
  -1   1   0    3.10    0.40
  -1   1   0    3.00    0.40
   2  -2   0  275.87   10.30
   2  -2   0  267.37   10.40
  -2   2   0  282.77   10.40
  -2   2   0  261.97   10.40
  -2   2   0  270.27   10.40
   3  -3   0  118.59    5.40
   3  -3   0  114.09    5.30
  -3   3   0  110.99    5.10
  -3   3   0  114.19    5.30
  -3   3   0  115.09    5.20
   4  -4   0  821.42   31.00
   4  -4   0  827.32   30.70
  -4   4   0  825.42   31.00
  -4   4   0  807.72   31.00
  -4   4   0  831.72   30.70
   5  -5   0  397.36   14.70
   5  -5   0  363.46   15.00
  -5   5   0  395.06   14.90
  -5   5   0  378.06   14.90
  -5   5   0  354.26   14.90
   6  -6   0   58.39    5.10
   6  -6   0   63.29    4.20
  -6   6   0   74.49    5.10
  -6   6   0   54.09    4.60
  -6   6   0   51.29    4.50
   7  -7   0  150.38    7.30
   7  -7   0  143.49    7.90
  -7   7   0  139.99    7.80
  -7   7   0  147.89    7.30
  -7   7   0  150.38    7.30
   8  -8   0  223.88   10.00
   8  -8   0  208.48    9.40
  -8   8   0  198.38    9.40
  -8   8   0  207.48    9.70
  -8   8   0  191.88    9.80
  -8   8   0  195.28    9.70
   9  -9   0   59.39    4.60
   9  -9   0   64.69    5.30
  -9   9   0   46.90    4.50
  -9   9   0   60.39    4.50
  -9   9   0   60.39    4.60
  -9   9   0   62.19    5.10
  10 -10   0    1.00    3.80
 -10  10   0   -3.40    3.30
 -10  10   0   -3.50    2.60
 -10  10   0    1.50    3.70
 -10  10   0    0.10    2.90
  11 -11   0   70.89    6.60
 -11  11   0   64.79    5.80
 -11  11   0   72.19    6.40
  12 -12   0   11.20    5.20
 -12  12   0    9.20    4.50
 -12  12   0   13.10    3.70
  13 -13   0   33.50    6.10
 -13  13   0   34.40    5.30
  14 -14   0    2.60    5.90
 -14  14   0   -0.20    4.70
 -14  14   0   -0.50    5.20
  15 -15   0   39.40    7.20
 -15  15   0   20.20    5.90
 -15  15   0   21.00    6.20
 -16  14   1    5.60    5.50
 -16  14   1   11.00    5.60
  16 -14  -1    6.20    5.90
 -15  13   1   10.10    5.30
 -15  13   1   17.00    5.20
  15 -13  -1    3.90    5.50
 -14  12   1   -9.20    3.90
 -14  12   1   -2.60    4.60
  14 -12  -1   -1.70    5.00
 -13  11   1  126.29   10.20
 -13  11   1  129.59    8.70
 -13  11   1  133.39    9.40
  13 -11  -1  159.58   10.60
 -12  10   1   72.19    6.00
 -12  10   1   80.09    7.00
 -12  10   1   71.69    5.80
  12 -10  -1   76.69    6.30
 -11   9   1  144.89    8.70
 -11   9   1  146.99    8.50
 -11   9   1  155.28    8.50
  11  -9  -1  167.88    9.60
  11  -9  -1  161.88    8.20
 -10   8   1    2.50    2.60
 -10   8   1    2.20    3.00
 -10   8   1   -0.10    2.50
  10  -8  -1    2.20    2.50
  10  -8  -1    3.70    3.30
  -9   7   1   15.20    2.80
  -9   7   1   16.00    3.10
  -9   7   1   11.80    2.60
   9  -7  -1   13.00    3.20
   9  -7  -1   12.80    2.50
   9  -7  -1   11.10    2.60
  -8   6   1  926.61   34.40
  -8   6   1  922.81   34.70
  -8   6   1  893.71   34.70
   8  -6  -1  873.91   34.70
   8  -6  -1  944.71   34.90
  -7   5   1  127.89    6.10
  -7   5   1  130.29    6.10
  -7   5   1  126.79    6.20
   7  -5  -1  127.99    6.50
   7  -5  -1  128.19    5.90
   7  -5  -1   96.29    5.80
  -6   4   1    8.10    1.80
  -6   4   1    7.80    1.90
  -6   4   1    4.50    1.60
   6  -4  -1    8.10    2.10
   6  -4  -1    6.30    1.70
  -5   3   1  711.53   28.10
  -5   3   1  747.53   27.80
  -5   3   1  754.32   28.20
   5  -3  -1  781.42   27.80
   5  -3  -1  742.13   28.10
   5  -3  -1  748.83   28.20
  -4   2   1   55.19    3.10
  -4   2   1   50.49    3.10
  -4   2   1   52.59    3.30
   4  -2  -1   64.49    3.50
   4  -2  -1   50.89    3.00
   4  -2  -1   56.09    3.20
  -3   1   1   96.19    4.50
  -3   1   1   89.59    3.90
  -3   1   1   95.99    3.90
   3  -1  -1   95.39    3.90
   3  -1  -1   96.49    3.90
  -2   0   1   -0.30    0.50
  -2   0   1    0.20    0.40
  -2   0   1   -0.10    0.30
   2   0  -1    0.40    0.40
   2   0  -1   -0.70    0.40
   2   0  -1   -0.30    0.50
  -1  -1   1 1361.66   58.29
  -1  -1   1 1715.83   59.09
   1   1  -1 1802.52   59.19
   1   1  -1 1483.25   58.39
   0  -2   1  247.68    9.40
   0  -2   1  247.78    9.40
   0  -2   1  249.68   10.00
   0   2  -1  236.18    9.40
   0   2  -1  249.58    9.40
   0   2  -1  248.48   10.00
   0   2  -1  249.88    9.40
   1  -3   1 4189.68  151.28
   1  -3   1 4214.18  148.79
   1  -3   1 3775.82  160.78
   1  -3   1 4070.59  150.78
  -1   3  -1 3943.91  160.98
  -1   3  -1 4110.29  148.79
  -1   3  -1 4159.78  150.78
   2  -4   1   55.99    3.90
   2  -4   1   64.49    3.80
   2  -4   1   80.39    4.00
  -2   4  -1   57.49    3.70
  -2   4  -1   73.69    4.10
  -2   4  -1   45.80    3.60
  -2   4  -1   66.89    3.70
   3  -5   1  396.06   15.50
   3  -5   1  426.26   15.50
   3  -5   1  387.26   15.60
  -3   5  -1  369.46   16.20
  -3   5  -1  404.96   15.50
  -3   5  -1  389.56   15.50
  -3   5  -1  402.96   15.50
   4  -6   1   14.60    2.40
   4  -6   1   16.00    2.60
   4  -6   1   14.40    2.20
  -4   6  -1   18.30    2.10
  -4   6  -1   10.90    2.00
  -4   6  -1   15.90    2.40
  -4   6  -1   13.50    2.60
   5  -7   1  433.86   17.20
   5  -7   1  433.26   17.30
   5  -7   1  426.06   17.50
  -5   7  -1  456.45   17.50
  -5   7  -1  427.06   17.20
  -5   7  -1  419.56   17.30
  -5   7  -1  441.46   18.00
   6  -8   1   12.30    2.70
   6  -8   1    9.10    2.70
   6  -8   1   10.60    3.30
  -6   8  -1   11.20    2.40
  -6   8  -1   13.80    3.20
  -6   8  -1   10.70    2.60
  -6   8  -1    6.60    2.40
   7  -9   1  262.97   12.40
   7  -9   1  283.97   12.00
  -7   9  -1  278.77   12.20
  -7   9  -1  270.77   11.90
  -7   9  -1  267.17   12.20
  -7   9  -1  259.87   12.30
   8 -10   1   11.30    3.90
  -8  10  -1   13.60    3.80
  -8  10  -1    6.30    2.80
  -8  10  -1    6.30    3.10
  -8  10  -1    5.90    2.80
   9 -11   1  114.19    9.00
  -9  11  -1  100.19    8.20
  -9  11  -1  102.79    8.50
  -9  11  -1  113.69    7.20
  10 -12   1    3.80    4.50
 -10  12  -1   -1.10    3.80
 -10  12  -1   -1.10    2.90
  11 -13   1    0.70    4.80
 -11  13  -1   -0.90    4.00
  12 -14   1   46.10    6.90
 -12  14  -1   41.70    5.90
  13 -15   1    6.70    6.40
 -13  15  -1    7.80    5.40
  14 -16   1   -6.20    6.40
 -14  16  -1    4.50    5.70
 -18  14   2   -3.40    5.20
 -18  14   2    3.30    5.90
  18 -14  -2    0.70    6.30
 -17  13   2   -2.20    5.30
 -17  13   2   -3.80    4.90
  17 -13  -2   -0.50    5.70
 -16  12   2   78.09    6.80
 -16  12   2   63.59    7.40
  16 -12  -2   56.39    7.00
 -15  11   2   -1.50    4.70
 -15  11   2    0.50    4.10
  15 -11  -2    0.40    4.90
 -14  10   2   12.60    3.90
 -14  10   2   21.30    5.10
  14 -10  -2   14.30    4.90
 -13   9   2    3.10    4.20
 -13   9   2    1.20    3.00
 -13   9   2    3.60    3.30
 -13   9   2    0.40    3.40
  13  -9  -2    3.90    2.90
  13  -9  -2    1.30    4.00
 -12   8   2  218.78   10.60
 -12   8   2  224.48   12.40
 -12   8   2  237.88   11.00
 -12   8   2  233.48   10.80
  12  -8  -2  227.58   10.30
  12  -8  -2  236.78   11.40
 -11   7   2   40.90    4.00
 -11   7   2   59.19    5.20
 -11   7   2   55.99    4.20
 -11   7   2   54.69    5.10
  11  -7  -2   56.99    4.70
  11  -7  -2   61.59    4.70
  11  -7  -2   46.60    4.00
 -10   6   2   43.60    3.50
 -10   6   2   38.00    3.50
 -10   6   2   45.90    3.70
 -10   6   2   48.10    4.60
  10  -6  -2   46.80    4.00
  10  -6  -2   40.40    3.50
  -9   5   2  246.88   10.30
  -9   5   2  236.58   10.40
  -9   5   2  231.28   11.90
  -9   5   2  238.68   10.10
   9  -5  -2  261.97   10.70
   9  -5  -2  243.08   10.50
   9  -5  -2  235.18    9.90
  -8   4   2  234.18    9.80
  -8   4   2  243.98    9.90
  -8   4   2  226.58   11.30
  -8   4   2  228.48    9.50
   8  -4  -2  244.98    9.50
   8  -4  -2  237.08    9.80
   8  -4  -2  235.98   10.00
  -7   3   2   45.40    3.60
  -7   3   2   49.00    3.10
  -7   3   2   48.90    4.10
  -7   3   2   46.60    3.20
   7  -3  -2   44.10    3.80
   7  -3  -2   47.10    2.90
  -6   2   2   61.99    3.80
  -6   2   2   63.89    4.60
   6  -2  -2   80.59    4.00
   6  -2  -2   57.89    3.70
  -5   1   2  808.72   33.70
  -5   1   2  792.12   30.00
   5  -1  -2  803.72   30.00
  -4   0   2  119.59    5.90
  -4   0   2  121.39    5.00
  -4   0   2  116.89    5.00
   4   0  -2  122.89    5.10
   4   0  -2  123.39    5.80
   4   0  -2  123.19    5.00
  -3  -1   2 1523.75   55.59
  -3  -1   2 1523.15   55.59
  -3  -1   2 1489.35   54.99
   3   1  -2 1534.95   55.59
   3   1  -2 1512.95   55.59
   3   1  -2 1429.26   62.29
  -2  -2   2  109.09    4.90
  -2  -2   2  114.49    4.70
  -2  -2   2  115.49    4.80
   2   2  -2  116.79    4.80
   2   2  -2  117.19    4.90
  -1  -3   2 1498.65   54.29
  -1  -3   2 1504.75   54.29
   1   3  -2 1466.15   54.29
   1   3  -2 1460.45   54.29
   1   3  -2 1388.26   53.89
   0  -4   2   94.49    4.90
   0  -4   2  100.19    4.70
   0  -4   2   90.49    4.90
   0   4  -2   99.69    4.70
   0   4  -2   99.19    4.70
   0   4  -2   98.89    5.20
   1  -5   2   10.30    2.00
   1  -5   2    9.60    2.00
   1  -5   2   11.60    1.80
  -1   5  -2   12.20    1.90
  -1   5  -2    9.90    1.70
  -1   5  -2    9.40    1.60
  -1   5  -2   11.00    2.30
   2  -6   2    3.30    2.00
   2  -6   2    0.30    1.60
   2  -6   2    1.00    1.90
   2  -6   2    1.00    1.90
  -2   6  -2   -1.20    2.10
  -2   6  -2    2.50    1.90
  -2   6  -2    3.10    1.80
  -2   6  -2    3.00    1.60
   3  -7   2  140.69    6.70
   3  -7   2  137.69    7.20
   3  -7   2  127.79    7.00
  -3   7  -2  147.09    7.00
  -3   7  -2  133.59    7.50
  -3   7  -2  140.79    6.70
  -3   7  -2  141.99    6.80
   4  -8   2  366.16   14.90
   4  -8   2  335.87   14.60
   4  -8   2  347.27   14.60
  -4   8  -2  362.56   14.80
  -4   8  -2  353.76   15.00
  -4   8  -2  372.96   14.70
  -4   8  -2  364.66   15.10
   5  -9   2    2.10    3.30
   5  -9   2    1.00    2.60
   5  -9   2   -2.50    2.00
  -5   9  -2   -1.80    3.00
  -5   9  -2   -2.90    2.30
  -5   9  -2   -1.10    2.60
  -5   9  -2   -5.70    2.00
   6 -10   2   -0.70    3.40
  -6  10  -2    7.00    2.80
  -6  10  -2   -1.20    3.60
  -6  10  -2    2.60    2.30
  -6  10  -2    3.60    2.90
   7 -11   2   91.39    8.30
  -7  11  -2   84.79    6.60
  -7  11  -2   99.59    8.10
  -7  11  -2  104.19    6.40
   8 -12   2  212.58   12.10
  -8  12  -2  201.38   11.40
  -8  12  -2  204.38   10.30
   9 -13   2   -2.90    5.10
  -9  13  -2   -1.60    4.00
  -9  13  -2   -8.70    3.10
  10 -14   2    7.80    5.30
 -10  14  -2   15.50    5.40
  11 -15   2   -2.00    5.60
 -11  15  -2    9.30    5.00
  12 -16   2   22.30    6.70
 -12  16  -2   13.00    6.00
 -19  13   3   -0.40    5.10
 -19  13   3   -1.00    5.70
  19 -13  -3   -3.80    6.00
 -18  12   3    4.00    5.50
 -18  12   3   -2.70    4.70
  18 -12  -3    0.60    5.40
 -17  11   3   -1.80    4.20
 -17  11   3   -1.00    5.10
  17 -11  -3    1.60    5.00
 -16  10   3   44.60    6.50
 -16  10   3   48.40    5.30
  16 -10  -3   40.90    5.70
 -15   9   3    3.30    4.50
 -15   9   3   -2.70    3.40
 -15   9   3   -1.90    3.10
  15  -9  -3   -4.50    2.90
  15  -9  -3   -3.40    4.10
 -14   8   3    1.60    4.10
 -14   8   3    2.80    2.90
 -14   8   3    0.50    2.90
  14  -8  -3    1.20    3.80
  14  -8  -3   -1.20    2.50
 -13   7   3  225.78   10.60
 -13   7   3  224.98   12.40
 -13   7   3  215.08   10.30
 -13   7   3  236.18   10.70
  13  -7  -3  243.28   11.20
  13  -7  -3  229.98   10.00
 -12   6   3   60.39    5.60
  12  -6  -3   96.69    6.60
  12  -6  -3   87.19    5.90
 -11   5   3  552.94   21.30
 -11   5   3  585.94   21.90
 -11   5   3  532.95   24.60
 -11   5   3  542.05   21.80
  11  -5  -3  560.44   21.90
  11  -5  -3  549.74   21.80
  11  -5  -3  573.44   21.20
 -10   4   3  207.48   10.80
 -10   4   3  222.18    9.40
  10  -4  -3  211.98    9.30
  10  -4  -3  214.28    9.60
  -9   3   3  410.66   18.70
  -9   3   3  420.66   16.50
   9  -3  -3  427.16   16.50
   9  -3  -3  426.66   16.60
  -8   2   3   81.39    4.40
  -8   2   3   87.39    5.50
   8  -2  -3   63.19    4.10
   8  -2  -3   79.89    4.60
   8  -2  -3   84.59    5.30
  -7   1   3  395.06   14.90
  -7   1   3  365.96   16.80
   7  -1  -3  387.46   14.80
  -6   0   3   -0.30    1.50
  -6   0   3    1.10    1.50
  -6   0   3   -2.60    2.10
   6   0  -3   -2.90    1.80
   6   0  -3    0.60    1.50
  -5  -1   3  260.27   10.40
  -5  -1   3  266.57   10.40
  -5  -1   3  271.97   12.00
   5   1  -3  263.97   10.30
   5   1  -3  272.17   11.90
   5   1  -3  256.77   10.40
  -4  -2   3  487.25   18.10
  -4  -2   3  493.65   18.00
  -4  -2   3  406.46   17.90
   4   2  -3  495.15   18.00
   4   2  -3  500.95   18.10
   3   3  -3   -0.30    0.70
   3   3  -3    6.10    1.80
  -2  -4   3   44.20    3.20
  -2  -4   3   52.49    3.70
  -2  -4   3   44.30    3.40
   2   4  -3   45.80    3.00
   2   4  -3   42.10    3.20
   2   4  -3   49.20    3.70
  -1  -5   3  521.05   19.80
  -1  -5   3  508.35   20.90
  -1  -5   3  535.65   19.80
   1   5  -3  520.65   19.80
   1   5  -3  515.15   19.80
   1   5  -3  491.95   19.80
   0  -6   3  393.66   15.80
   0  -6   3  390.16   16.50
   0  -6   3  395.86   15.70
   0   6  -3  397.16   15.70
   0   6  -3  406.06   15.70
   0   6  -3  411.56   15.90
   1  -7   3   -4.20    2.20
   1  -7   3    0.10    2.40
   1  -7   3   -2.80    2.10
   1  -7   3   -0.60    1.90
  -1   7  -3   -0.40    2.30
  -1   7  -3   -2.70    2.50
  -1   7  -3   -1.60    1.80
   2  -8   3    3.30    2.00
   2  -8   3   -0.20    2.60
   2  -8   3   -7.90    2.40
   2  -8   3    1.60    2.50
  -2   8  -3    5.30    2.30
  -2   8  -3    7.00    2.60
  -2   8  -3   -5.40    2.70
  -2   8  -3    0.60    1.80
   3  -9   3    0.60    2.50
   3  -9   3    2.60    2.20
   3  -9   3   -2.70    2.80
  -3   9  -3    2.20    2.00
  -3   9  -3    1.80    2.60
  -3   9  -3    0.70    2.00
  -3   9  -3   -0.90    3.00
   4 -10   3  292.47   13.30
  -4  10  -3  290.67   12.70
  -4  10  -3  281.07   13.00
  -4  10  -3  304.57   12.80
  -4  10  -3  285.67   13.40
   5 -11   3    0.10    3.80
  -5  11  -3    6.00    2.50
  -5  11  -3    6.60    4.00
  -5  11  -3    2.30    3.40
   6 -12   3   -1.10    4.50
  -6  12  -3    1.10    3.60
  -6  12  -3   -3.20    2.60
   7 -13   3    0.10    4.40
  -7  13  -3   -3.40    4.00
  -7  13  -3    0.30    2.70
   8 -14   3    9.20    5.20
  -8  14  -3   14.00    4.70
   9 -15   3   21.00    5.70
  -9  15  -3   20.20    5.30
  10 -16   3   -5.50    5.50
 -10  16  -3   -5.50    5.00
 -20  12   4   40.10    7.30
  20 -12  -4   41.40    7.20
 -19  11   4    5.70    5.80
  19 -11  -4   13.20    5.50
 -18  10   4   -0.80    5.10
  18 -10  -4   -4.70    4.70
 -17   9   4   88.49    7.90
 -17   9   4   67.29    5.90
  17  -9  -4   90.69    6.40
  17  -9  -4   80.19    6.80
 -16   8   4   -4.20    3.20
 -16   8   4   -6.40    4.40
  16  -8  -4    0.90    2.70
  16  -8  -4   -1.90    4.20
 -15   7   4  224.58   10.70
 -15   7   4  205.58   12.60
  15  -7  -4  213.38    9.70
  15  -7  -4  223.98   11.20
 -14   6   4    5.80    2.70
 -14   6   4   12.60    3.20
 -14   6   4    8.10    4.00
  14  -6  -4   10.90    3.50
 -13   5   4   19.50    2.90
 -13   5   4   20.60    4.10
  13  -5  -4   13.10    3.20
  13  -5  -4   12.30    2.70
 -12   4   4  530.25   20.30
 -12   4   4  499.35   23.00
  12  -4  -4  507.55   20.30
  12  -4  -4  513.05   20.20
 -11   3   4   52.09    4.80
 -11   3   4   67.59    4.60
  11  -3  -4   55.69    4.90
  11  -3  -4   53.69    4.20
 -10   2   4   41.70    3.60
  10  -2  -4   23.90    2.80
  -9   1   4  192.28    8.00
  -9   1   4  173.48    7.80
  -9   1   4  173.68    9.20
   9  -1  -4  186.08    7.90
  -8   0   4   87.19    4.50
  -8   0   4   80.19    5.50
  -8   0   4   80.49    4.40
   8   0  -4   77.79    4.30
  -7  -1   4   -0.60    1.40
  -7  -1   4   -0.10    1.50
  -7  -1   4    1.00    2.10
   7   1  -4    1.20    2.10
   7   1  -4   -0.40    1.40
   7   1  -4    2.70    1.50
  -6  -2   4  241.48    9.00
  -6  -2   4  229.58    9.20
  -6  -2   4  226.58    9.20
   6   2  -4  222.88    9.10
   6   2  -4  225.98    9.10
   6   2  -4  219.18   10.60
  -5  -3   4  405.56   16.40
  -5  -3   4  431.96   16.60
  -5  -3   4  444.16   16.50
   5   3  -4  430.56   16.50
   5   3  -4  442.86   16.50
  -4  -4   4 1121.09   40.20
  -4  -4   4 1075.19   40.40
  -4  -4   4 1106.89   40.40
   4   4  -4 1031.10   40.10
   4   4  -4 1064.59   40.40
  -3  -5   4  188.08    8.70
  -3  -5   4  204.78    8.60
  -3  -5   4  211.18    8.50
   3   5  -4  211.08    8.50
   3   5  -4  199.68    8.80
  -2  -6   4   19.50    2.70
  -2  -6   4   23.60    2.60
  -2  -6   4   29.40    2.60
  -2  -6   4   18.60    2.50
   2   6  -4   25.60    2.40
   2   6  -4   21.20    2.70
   2   6  -4   23.00    2.30
  -1  -7   4  123.29    6.00
  -1  -7   4  118.39    6.50
  -1  -7   4  117.99    6.40
   1   7  -4  115.59    5.90
   1   7  -4  124.79    6.20
   1   7  -4  114.69    6.70
   0  -8   4  616.24   25.30
   0  -8   4  639.44   23.90
   0  -8   4  603.24   24.10
   0   8  -4  598.34   23.90
   0   8  -4  591.94   24.10
   0   8  -4  637.64   23.90
   1  -9   4  116.89    6.60
   1  -9   4  123.29    7.10
   1  -9   4  123.39    7.00
   1  -9   4  122.69    7.50
  -1   9  -4  122.39    6.60
  -1   9  -4  119.29    7.70
  -1   9  -4  119.69    7.10
   2 -10   4   -1.70    3.00
  -2  10  -4   -1.30    2.30
  -2  10  -4   -4.70    2.70
  -2  10  -4   -6.70    3.20
   3 -11   4   90.99    7.60
  -3  11  -4   97.99    7.50
  -3  11  -4   90.89    7.90
   4 -12   4   73.79    6.50
  -4  12  -4   58.89    5.70
   5 -13   4  138.19   10.10
  -5  13  -4  129.79    9.60
   6 -14   4   -7.90    4.80
  -6  14  -4   -0.80    4.10
   7 -15   4    5.30    5.00
  -7  15  -4   14.10    5.20
   8 -16   4    2.60    5.70
  -8  16  -4    9.00    5.40
   9 -17   4   17.80    6.40
  -9  17  -4    4.20    5.80
 -22  12   5   -4.90    6.50
 -21  11   5   13.20    6.80
 -20  10   5   -1.40    6.10
  20 -10  -5    2.00    5.00
 -19   9   5    5.30    4.10
 -19   9   5    4.70    5.60
  19  -9  -5    4.80    4.80
 -18   8   5    2.60    3.60
 -18   8   5    9.50    5.50
  18  -8  -5    4.50    4.40
  18  -8  -5    3.20    2.60
 -17   7   5   69.19    7.20
 -17   7   5   55.39    5.10
  17  -7  -5   56.69    5.60
 -16   6   5  172.48   11.50
 -16   6   5  181.58    9.60
  16  -6  -5  177.28    9.90
 -15   5   5  114.19    7.10
 -15   5   5  101.69    9.00
  15  -5  -5  120.19    7.70
 -14   4   5    6.20    2.60
 -14   4   5   -0.10    3.40
  14  -4  -5    3.60    3.10
  14  -4  -5   -1.80    2.30
 -13   3   5  299.47   12.70
 -13   3   5  318.97   14.80
  13  -3  -5  288.17   12.90
 -12   2   5  608.64   23.50
 -12   2   5  602.84   26.60
  12  -2  -5  607.74   23.40
  12  -2  -5  607.24   23.50
  12  -2  -5  602.94   26.70
 -11   1   5    2.20    2.90
 -11   1   5    0.40    1.90
 -11   1   5    1.40    2.10
  11  -1  -5    0.40    2.30
  11  -1  -5    1.00    2.10
 -10   0   5    1.20    1.80
 -10   0   5   -1.00    2.20
 -10   0   5   -2.20    1.80
  10   0  -5   -0.60    1.00
  10   0  -5   -0.30    1.80
  -9  -1   5   38.20    2.80
  -9  -1   5   37.40    3.80
  -9  -1   5   34.90    2.60
   9   1  -5   37.80    3.30
  -8  -2   5  555.44   21.00
  -8  -2   5  547.85   21.50
  -8  -2   5  580.04   21.50
   8   2  -5  569.64   21.40
  -7  -3   5   65.89    3.90
  -7  -3   5   64.99    4.00
   7   3  -5   59.59    3.80
  -6  -4   5  193.38    8.00
  -6  -4   5  186.08    8.10
  -6  -4   5  184.48    8.00
   6   4  -5  190.48    7.90
  -5  -5   5  283.47   11.80
  -5  -5   5  283.07   11.80
  -5  -5   5  304.67   11.70
   5   5  -5  287.57   11.60
  -4  -6   5   18.00    2.60
  -4  -6   5   17.70    2.50
  -4  -6   5   23.80    2.50
   4   6  -5   23.20    2.80
   4   6  -5   25.50    2.50
   4   6  -5   23.60    2.40
  -3  -7   5  482.35   20.10
  -3  -7   5  523.45   21.30
  -3  -7   5  527.65   20.10
  -3  -7   5  493.65   20.10
   3   7  -5  509.65   20.00
   3   7  -5  525.55   20.20
   3   7  -5  518.15   20.10
  -2  -8   5   25.30    3.20
  -2  -8   5   29.50    3.00
  -2  -8   5   31.30    3.30
  -2  -8   5   35.70    3.40
   2   8  -5   30.10    2.90
   2   8  -5   32.10    3.90
   2   8  -5   32.90    3.30
  -1  -9   5  187.58    9.00
  -1  -9   5  172.58    9.10
  -1  -9   5  183.18    8.60
   1   9  -5  185.48    9.40
   1   9  -5  187.88    8.80
   1   9  -5  176.18    8.50
   0 -10   5   11.90    3.20
   0 -10   5   11.50    3.40
   0 -10   5    4.20    2.40
   0  10  -5    7.20    3.50
   0  10  -5    9.60    3.30
   1 -11   5  124.29    7.80
   1 -11   5  112.89    8.20
  -1  11  -5  121.39    8.10
  -1  11  -5  110.69    8.50
   2 -12   5   24.80    4.60
  -2  12  -5   31.50    4.50
   3 -13   5   68.99    6.50
  -3  13  -5   62.89    6.00
   4 -14   5  134.69   10.50
  -4  14  -5  136.29   10.20
   5 -15   5   19.90    5.50
  -5  15  -5   18.50    5.30
   6 -16   5    5.90    5.70
  -6  16  -5   10.60    5.30
   7 -17   5    6.90    6.00
  -7  17  -5   10.50    5.80
 -23  11   6   11.10    7.20
 -22  10   6    3.80    6.40
 -21   9   6   -2.60    5.80
  21  -9  -6    0.70    5.00
 -20   8   6   53.49    7.20
  20  -8  -6   43.30    5.90
 -19   7   6    2.80    3.70
 -19   7   6    3.00    5.20
  19  -7  -6   -4.90    4.40
 -18   6   6   -2.10    3.50
 -18   6   6   -3.60    4.60
  18  -6  -6   -3.60    4.10
 -17   5   6   -0.70    4.50
 -17   5   6   -0.80    3.10
  17  -5  -6    4.30    4.00
 -16   4   6  429.86   17.60
 -16   4   6  420.66   20.30
  16  -4  -6  427.26   17.80
 -15   3   6   47.10    5.80
 -15   3   6   53.19    4.30
  15  -3  -6   59.49    5.00
  15  -3  -6   53.89    4.50
 -14   2   6   14.80    4.00
 -14   2   6   17.40    2.80
 -14   2   6   16.30    2.70
  14  -2  -6   18.50    3.60
  14  -2  -6   13.30    2.40
  14  -2  -6   21.40    3.00
 -13   1   6   78.59    5.60
 -13   1   6   90.69    7.40
 -13   1   6   89.09    5.70
  13  -1  -6   89.59    5.80
 -12   0   6  688.43   30.10
 -12   0   6  741.03   26.50
 -12   0   6  672.53   26.40
  12   0  -6  716.53   26.40
  12   0  -6  623.14   29.90
 -11  -1   6   15.30    3.30
 -11  -1   6   12.40    2.20
 -11  -1   6   12.30    2.30
  11   1  -6   11.60    2.20
  11   1  -6   12.20    2.20
  11   1  -6   14.40    3.20
 -10  -2   6   44.70    4.00
 -10  -2   6   47.10    4.00
  10   2  -6   44.60    3.90
  10   2  -6   49.20    4.00
  10   2  -6   48.80    4.50
  -9  -3   6  536.85   20.00
  -9  -3   6  509.85   20.30
  -9  -3   6  546.45   20.30
   9   3  -6  530.95   20.30
   9   3  -6  528.95   20.30
   9   3  -6  512.45   23.20
  -8  -4   6   80.79    4.70
  -8  -4   6   78.29    4.90
  -8  -4   6   96.79    4.90
   8   4  -6   74.69    5.80
   8   4  -6   87.89    4.70
   8   4  -6   86.29    4.70
  -7  -5   6  483.35   18.20
  -7  -5   6  439.86   18.20
  -7  -5   6  485.75   18.10
   7   5  -6  446.46   18.10
   7   5  -6  472.35   18.20
  -6  -6   6   15.30    2.30
  -6  -6   6   15.30    2.50
  -6  -6   6   10.20    2.40
   6   6  -6   10.70    2.20
  -5  -7   6   20.80    2.90
  -5  -7   6   18.90    2.80
  -5  -7   6   30.70    3.10
   5   7  -6   24.70    2.70
   5   7  -6   22.40    2.50
  -4  -8   6   87.29    5.80
  -4  -8   6   84.29    6.10
  -4  -8   6   77.39    5.40
  -4  -8   6   89.29    6.10
   4   8  -6   85.49    5.40
   4   8  -6   85.29    5.80
  -3  -9   6   56.19    4.70
  -3  -9   6   55.99    4.90
  -3  -9   6   50.19    4.40
  -3  -9   6   60.89    5.50
   3   9  -6   53.89    4.20
   3   9  -6   62.79    4.90
  -2 -10   6   15.90    3.40
  -2 -10   6   18.70    3.30
  -2 -10   6   14.60    3.50
   2  10  -6    9.90    2.90
  -1 -11   6   73.79    6.70
  -1 -11   6   86.49    7.60
   1  11  -6   84.29    7.20
   0 -12   6   98.59    8.40
   0 -12   6   99.39    7.80
   0  12  -6   99.39    8.20
   1 -13   6   26.20    4.90
  -1  13  -6   25.60    5.00
   2 -14   6    5.10    4.90
  -2  14  -6    1.80    4.50
   3 -15   6    4.00    5.00
  -3  15  -6    3.00    5.00
   4 -16   6   55.69    6.80
  -4  16  -6   52.69    6.90
   5 -17   6   -1.00    5.90
  -5  17  -6   -4.50    5.20
 -24  10   7   32.90    8.00
 -23   9   7    0.90    6.60
 -22   8   7    4.20    6.30
  22  -8  -7    1.20    5.00
 -21   7   7   29.00    6.90
  21  -7  -7   22.70    5.20
 -20   6   7  104.89    9.30
 -20   6   7  119.69    8.90
  20  -6  -7  109.39    9.00
 -19   5   7   36.90    6.40
 -19   5   7   42.30    4.80
  19  -5  -7   36.90    5.00
 -18   4   7    4.20    3.40
 -18   4   7    2.70    3.10
 -18   4   7   -1.50    4.60
  18  -4  -7   -0.90    3.70
 -17   3   7   82.99    6.60
  17  -3  -7   95.69    6.80
 -16   2   7   51.59    4.30
 -16   2   7   56.19    6.10
 -16   2   7   48.30    4.20
  16  -2  -7   54.29    4.80
  16  -2  -7   53.39    4.30
 -15   1   7   98.89    6.30
 -15   1   7   93.89    7.80
 -15   1   7   93.79    6.30
  15  -1  -7   97.49    6.20
 -14   0   7   -1.20    3.40
 -14   0   7   -2.50    2.30
 -14   0   7   -1.50    2.50
  14   0  -7   -1.80    2.50
  14   0  -7   -2.60    2.40
 -13  -1   7  624.44   28.90
 -13  -1   7  649.14   25.10
 -13  -1   7  684.43   25.20
  13   1  -7  615.04   28.70
  13   1  -7  688.23   25.20
 -12  -2   7   10.10    2.40
 -12  -2   7    6.70    2.40
  12   2  -7    8.90    2.20
  12   2  -7    7.90    3.10
 -11  -3   7  147.89    6.60
 -11  -3   7  134.39    7.20
 -11  -3   7  162.68    7.20
  11   3  -7  161.38    7.20
  11   3  -7  154.48    7.20
  11   3  -7  150.38    8.70
 -10  -4   7  139.09    6.90
 -10  -4   7  145.79    6.90
 -10  -4   7  135.49    6.50
  10   4  -7  140.99    8.50
  10   4  -7  138.89    6.70
  10   4  -7  141.59    6.70
  -9  -5   7  145.59    7.00
  -9  -5   7  156.38    7.20
  -9  -5   7  150.48    7.40
   9   5  -7  141.59    7.00
   9   5  -7  156.18    8.70
   9   5  -7  143.99    7.00
  -8  -6   7  300.87   13.00
  -8  -6   7  320.47   12.90
  -8  -6   7  318.27   12.90
   8   6  -7  305.07   12.80
   8   6  -7  318.87   12.90
  -7  -7   7   34.10    3.40
  -7  -7   7   41.00    3.60
  -7  -7   7   38.70    3.30
   7   7  -7   42.10    3.50
  -6  -8   7    1.10    2.50
  -6  -8   7    4.80    2.50
  -6  -8   7    1.90    2.70
   6   8  -7    3.00    2.30
   6   8  -7    3.70    1.90
  -5  -9   7   -2.50    2.50
  -5  -9   7    2.90    3.00
  -5  -9   7   -0.80    3.00
  -5  -9   7   -3.10    2.60
   5   9  -7   -1.40    2.50
  -4 -10   7  358.96   15.90
  -4 -10   7  354.56   15.40
  -4 -10   7  389.56   16.40
   4  10  -7  374.96   15.80
  -3 -11   7    0.90    3.30
  -3 -11   7   -4.40    3.50
   3  11  -7    1.20    3.10
  -2 -12   7    1.50    3.60
  -2 -12   7   -2.80    3.90
   2  12  -7    1.80    3.70
  -1 -13   7   16.00    4.70
  -1 -13   7   20.20    4.40
   1  13  -7   18.00    4.50
   0 -14   7   82.29    7.00
   0  14  -7   89.89    7.30
   1 -15   7    9.20    5.60
  -1  15  -7    6.00    4.80
   2 -16   7   -4.90    5.20
  -2  16  -7   -1.20    4.90
   3 -17   7    1.10    5.60
  -3  17  -7   -3.40    5.60
 -25   9   8   27.40    8.20
 -24   8   8    4.00    6.90
 -23   7   8    5.50    6.50
  23  -7  -8    2.40    5.20
 -22   6   8    7.80    4.50
 -22   6   8    7.60    6.30
  22  -6  -8    3.90    4.70
 -21   5   8  143.39   12.30
 -21   5   8  137.09    9.50
 -21   5   8  138.29    9.20
  21  -5  -8  136.29    9.60
 -20   4   8    2.40    5.70
 -20   4   8   10.00    3.90
 -20   4   8    4.40    3.40
  20  -4  -8    1.70    3.80
 -19   3   8   88.29    7.50
 -19   3   8  104.19    7.50
 -19   3   8   95.09    8.60
  19  -3  -8  100.89    7.60
 -18   2   8    9.40    5.00
 -18   2   8    6.80    3.20
 -18   2   8    6.70    3.30
  18  -2  -8    2.90    3.30
 -17   1   8   33.80    3.90
 -17   1   8   39.10    4.00
 -17   1   8   37.60    5.70
  17  -1  -8   35.10    3.80
 -16   0   8  135.29    9.90
 -16   0   8  130.09    7.60
 -16   0   8  143.69    7.80
  16   0  -8  143.19    7.70
 -15  -1   8   64.49    6.20
 -15  -1   8   64.89    5.60
 -15  -1   8   50.59    4.10
  15   1  -8   62.49    6.40
  15   1  -8   62.59    5.30
 -14  -2   8    7.30    2.60
 -14  -2   8    9.10    2.70
  14   2  -8    9.80    3.50
  14   2  -8    7.00    2.40
  14   2  -8   13.20    2.60
 -13  -3   8   71.79    5.10
 -13  -3   8   62.99    5.20
  13   3  -8   67.99    5.00
  13   3  -8   64.19    6.40
  13   3  -8   64.89    5.00
 -12  -4   8  362.96   14.60
 -12  -4   8  382.76   15.10
 -12  -4   8  357.86   15.20
  12   4  -8  387.96   15.00
  12   4  -8  379.46   17.60
  12   4  -8  363.66   15.00
 -11  -5   8  197.58    8.50
 -11  -5   8  175.38    8.10
 -11  -5   8  176.58    8.70
  11   5  -8  157.38   10.00
  11   5  -8  177.88    8.20
  11   5  -8  187.78    8.30
 -10  -6   8   35.00    3.20
 -10  -6   8   29.50    3.40
 -10  -6   8   32.60    3.30
  10   6  -8   36.40    4.30
  10   6  -8   44.80    3.50
  10   6  -8   27.80    3.00
  -9  -7   8   31.20    3.40
  -9  -7   8   27.50    3.10
  -9  -7   8   28.60    3.60
   9   7  -8   37.40    3.30
   9   7  -8   30.90    3.00
  -8  -8   8   73.69    6.40
  -8  -8   8   80.09    5.80
  -8  -8   8   95.19    6.10
   8   8  -8   88.59    6.00
  -7  -9   8  127.59    8.00
  -7  -9   8  129.59    7.40
   7   9  -8  134.09    7.60
  -6 -10   8   22.10    4.10
  -6 -10   8   20.90    4.00
  -6 -10   8   23.60    3.50
   6  10  -8   26.50    3.60
  -5 -11   8   26.10    4.20
  -5 -11   8   17.50    4.30
   5  11  -8   29.70    4.40
  -4 -12   8    8.20    4.20
  -4 -12   8   18.70    4.10
   4  12  -8   21.80    4.10
  -3 -13   8   31.60    5.20
  -3 -13   8   44.90    4.90
   3  13  -8   38.80    5.20
  -2 -14   8   15.40    4.80
  -2 -14   8   15.10    4.40
   2  14  -8   12.90    4.60
  -1 -15   8   17.10    5.60
  -1 -15   8   24.10    5.20
   1  15  -8   20.60    5.40
   0 -16   8    0.30    5.20
   0  16  -8   -5.10    5.00
   1 -17   8    9.60    6.30
  -1  17  -8   16.10    6.00
 -26   8   9   -9.60    7.60
 -26   8   9    2.90    5.40
 -25   7   9   16.10    8.00
 -25   7   9   12.60    5.20
 -24   6   9   -1.40    6.80
 -24   6   9    4.00    4.60
 -23   5   9   59.39    6.00
 -23   5   9   67.19    8.70
  23  -5  -9   49.60    5.50
 -22   4   9   46.20    7.70
 -22   4   9   39.80    5.20
  22  -4  -9   43.70    5.10
 -21   3   9    6.80    4.00
 -21   3   9    6.90    6.20
 -21   3   9    4.40    3.80
  21  -3  -9   10.70    4.00
 -20   2   9   32.40    4.40
 -20   2   9   39.30    4.70
 -20   2   9   38.90    7.00
  20  -2  -9   32.60    4.30
 -19   1   9   10.00    5.40
 -19   1   9    2.90    3.20
 -19   1   9    6.80    3.50
  19  -1  -9    9.30    3.50
 -18   0   9    3.50    4.50
 -18   0   9    2.30    2.90
 -18   0   9    1.80    3.10
  18   0  -9    1.90    3.00
 -17  -1   9   -0.60    4.40
 -17  -1   9   -3.80    3.00
 -17  -1   9    0.00    2.80
  17   1  -9    0.20    2.80
 -16  -2   9  361.56   15.40
 -16  -2   9  365.46   15.30
  16   2  -9  375.26   15.20
 -15  -3   9   24.00    3.40
 -15  -3   9   25.70    3.40
  15   3  -9   22.30    3.10
  15   3  -9   24.60    3.20
 -14  -4   9    5.10    2.90
 -14  -4   9    7.80    2.70
  14   4  -9    3.40    2.40
  14   4  -9    5.70    2.50
  14   4  -9    6.70    3.60
 -13  -5   9    4.30    2.20
 -13  -5   9    8.40    3.10
 -13  -5   9   10.20    2.70
  13   5  -9    7.60    2.50
  13   5  -9    8.70    3.70
 -12  -6   9  141.69    8.10
 -12  -6   9  139.29    7.20
 -12  -6   9  133.89    7.50
  12   6  -9  150.58    9.30
  12   6  -9  140.69    7.30
 -11  -7   9   73.49    5.50
 -11  -7   9   73.59    6.20
 -11  -7   9   61.69    5.40
  11   7  -9   67.09    6.90
  11   7  -9   75.49    5.60
 -10  -8   9   10.50    2.90
 -10  -8   9    9.70    3.10
 -10  -8   9   10.40    3.50
  10   8  -9   10.60    2.90
  -9  -9   9    0.60    3.50
  -9  -9   9    0.40    3.00
   9   9  -9    2.10    2.70
  -8 -10   9   45.60    4.40
  -8 -10   9   43.20    5.10
   8  10  -9   43.20    4.70
  -7 -11   9   46.70    5.30
  -7 -11   9   45.80    5.20
   7  11  -9   49.99    4.90
  -6 -12   9   10.30    4.10
  -6 -12   9    2.50    4.20
   6  12  -9    1.20    3.50
  -5 -13   9   13.90    4.50
  -5 -13   9    8.30    4.50
   5  13  -9    9.40    4.50
  -4 -14   9   -2.40    4.20
  -4 -14   9   -4.60    5.00
   4  14  -9   -0.30    4.20
  -3 -15   9   28.10    6.20
  -3 -15   9   32.80    5.30
   3  15  -9   31.40    5.60
  -2 -16   9    2.90    5.40
   2  16  -9    7.30    5.10
  -1 -17   9   -1.50    5.80
   1  17  -9   -7.00    5.00
 -27   7  10   21.50    5.70
 -27   7  10    5.60    8.80
 -26   6  10    7.60    5.20
 -26   6  10    1.60    8.30
 -25   5  10    4.60    7.70
 -25   5  10    6.50    4.90
 -24   4  10   69.79    6.40
 -24   4  10   84.49   10.00
 -23   3  10    9.10    7.40
 -23   3  10    8.20    4.50
  23  -3 -10    5.10    4.00
 -22   2  10   -2.00    3.60
 -22   2  10    3.80    6.70
 -22   2  10    5.50    4.00
  22  -2 -10    5.10    3.80
 -21   1  10    3.90    3.90
 -21   1  10    2.40    5.70
 -21   1  10   -2.30    3.40
  21  -1 -10   -2.10    3.50
 -20   0  10   96.49    7.30
 -20   0  10  100.49    9.20
 -20   0  10   94.59    7.60
  20   0 -10   93.99    7.30
 -19  -1  10   -3.70    3.30
 -19  -1  10    6.20    3.60
 -19  -1  10   -2.90    5.00
  19   1 -10    1.30    3.20
 -18  -2  10   -1.60    3.30
 -18  -2  10   -4.80    3.10
  18   2 -10   -1.90    3.00
 -17  -3  10   32.20    4.00
 -17  -3  10   29.90    3.80
  17   3 -10   26.70    3.60
 -16  -4  10  105.79    7.60
 -16  -4  10  119.39    7.10
  16   4 -10  116.69    6.80
 -15  -5  10   73.49    5.80
 -15  -5  10   60.29    4.80
 -15  -5  10   64.89    5.00
  15   5 -10   76.19    5.60
 -14  -6  10    5.50    2.90
 -14  -6  10    1.30    2.30
 -14  -6  10   -1.10    3.30
  14   6 -10    7.30    2.70
 -13  -7  10   80.99    6.00
 -13  -7  10   78.39    7.00
 -13  -7  10   94.89    6.50
  13   7 -10   90.19    6.30
 -12  -8  10    2.10    2.70
 -12  -8  10   -3.40    2.80
 -12  -8  10   -3.20    3.50
  12   8 -10   -0.80    2.80
 -11  -9  10  113.29    8.30
 -11  -9  10  120.79    7.60
  11   9 -10  116.09    7.60
 -10 -10  10    0.50    3.10
 -10 -10  10    0.50    3.70
  10  10 -10   -0.80    3.10
  -9 -11  10   22.60    4.80
  -9 -11  10   23.30    5.00
   9  11 -10   19.90    4.30
  -8 -12  10   43.00    5.50
  -8 -12  10   32.70    5.10
   8  12 -10   35.30    5.00
  -7 -13  10   13.20    4.90
  -7 -13  10   13.80    4.80
   7  13 -10   13.70    4.30
  -6 -14  10   12.80    5.60
  -6 -14  10   14.30    4.70
   6  14 -10   11.60    4.70
  -5 -15  10   10.10    4.90
  -5 -15  10    7.70    5.90
   5  15 -10   12.30    5.20
  -4 -16  10    3.30    5.00
  -4 -16  10    1.50    5.60
   4  16 -10    4.20    5.00
  -3 -17  10    7.10    6.40
   3  17 -10    1.30    5.30
 -27   5  11    4.90    5.30
 -27   5  11    9.50    8.60
 -26   4  11    8.20    8.80
 -26   4  11    9.00    5.20
 -25   3  11   28.90    8.50
 -25   3  11   33.20    5.30
 -24   2  11   75.29    6.60
 -24   2  11   86.99    9.70
  24  -2 -11   91.29    8.20
 -23   1  11   25.90    7.50
 -23   1  11   18.90    4.60
  23  -1 -11   20.70    4.20
 -22   0  11   -4.00    6.10
 -22   0  11   -4.50    3.80
 -22   0  11   -1.30    3.50
  22   0 -11   -2.40    3.50
 -21  -1  11   44.60    4.80
 -21  -1  11   33.60    4.80
  21   1 -11   36.20    4.30
 -20  -2  11   16.10    3.90
 -20  -2  11   19.60    4.30
  20   2 -11   18.00    3.80
 -19  -3  11  215.98   10.40
 -19  -3  11  189.48   10.70
  19   3 -11  207.38   10.20
 -18  -4  11   -0.30    3.30
 -18  -4  11   -5.60    3.60
  18   4 -11   -0.70    2.90
 -17  -5  11   42.80    4.80
 -17  -5  11   40.20    4.30
  17   5 -11   38.90    4.00
 -16  -6  11    1.00    2.30
 -16  -6  11    1.00    3.10
 -16  -6  11    4.30    3.90
  16   6 -11   -1.70    2.80
 -15  -7  11   41.60    3.90
 -15  -7  11   41.50    4.90
 -15  -7  11   42.70    4.40
  15   7 -11   36.50    4.10
 -14  -8  11   -6.00    3.70
 -14  -8  11    0.40    3.30
 -14  -8  11   -1.50    2.70
  14   8 -11    0.40    3.00
 -13  -9  11    6.90    4.20
 -13  -9  11    4.00    3.30
  13   9 -11    5.60    3.30
 -12 -10  11   26.90    4.80
  12  10 -11   19.50    4.10
 -11 -11  11    7.20    4.40
  11  11 -11    7.50    3.80
 -10 -12  11   17.80    5.10
 -10 -12  11   14.90    5.30
  10  12 -11   17.10    4.30
  -9 -13  11   53.19    6.60
  -9 -13  11   58.39    6.50
   9  13 -11   52.19    5.90
  -8 -14  11   50.99    6.20
  -8 -14  11   38.60    6.10
   8  14 -11   53.59    6.20
  -7 -15  11    1.90    4.80
  -7 -15  11    0.60    5.30
   7  15 -11    0.90    4.60
  -6 -16  11    1.30    5.00
  -6 -16  11   -3.20    5.60
   6  16 -11   -6.40    5.00
  -5 -17  11    3.50    6.50
   5  17 -11    2.90    5.90
 -28   4  12   12.20    9.00
 -28   4  12    5.30    5.20
 -27   3  12   57.19    6.40
 -27   3  12   46.10    9.40
 -26   2  12    3.50    4.80
 -26   2  12    3.10    8.10
 -25   1  12   14.40    4.80
 -25   1  12   10.40    8.00
 -24   0  12    1.70    4.40
  24   0 -12    4.80    4.00
 -23  -1  12   26.00    4.90
  23   1 -12   16.40    4.00
 -22  -2  12    3.60    4.20
 -22  -2  12    4.60    4.10
  22   2 -12   -1.50    3.50
 -21  -3  12   29.20    4.50
 -21  -3  12   32.00    4.90
  21   3 -12   27.30    4.10
 -20  -4  12   19.40    4.60
 -20  -4  12   20.60    4.00
  20   4 -12   21.50    3.70
 -19  -5  12   27.40    4.80
 -19  -5  12   28.30    4.20
  19   5 -12   24.10    3.80
 -18  -6  12    1.60    4.20
 -18  -6  12    9.00    3.60
 -18  -6  12    3.90    2.50
  18   6 -12    5.90    3.20
 -17  -7  12   17.50    3.20
 -17  -7  12   16.50    4.70
 -17  -7  12   20.00    4.00
  17   7 -12   21.00    3.70
 -16  -8  12  132.49    8.10
 -16  -8  12  151.58    9.10
 -16  -8  12  154.68   10.00
  16   8 -12  153.38    8.80
 -15  -9  12   18.20    4.80
 -15  -9  12   10.10    3.90
  15   9 -12   11.00    3.80
 -14 -10  12    4.30    4.50
  14  10 -12    1.70    3.50
 -13 -11  12   -1.50    4.70
  13  11 -12   -4.30    3.60
 -12 -12  12  113.69   10.20
 -12 -12  12  115.09   10.10
  12  12 -12  106.79    9.30
 -11 -13  12    2.70    5.00
 -11 -13  12    3.50    5.00
  11  13 -12    1.00    4.20
 -10 -14  12   -1.00    5.60
 -10 -14  12   -1.40    5.00
  10  14 -12    2.50    4.60
  -9 -15  12    3.70    6.00
  -9 -15  12    3.50    5.30
   9  15 -12    1.70    4.70
  -8 -16  12   23.30    5.70
  -8 -16  12    6.60    6.50
   8  16 -12    9.40    5.40
 -28   2  13   16.00    8.70
 -28   2  13    8.90    5.20
 -27   1  13   12.90    5.30
 -26   0  13   -8.50    4.60
 -25  -1  13   16.70    5.00
 -24  -2  13   -1.00    4.50
 -23  -3  13    2.10    4.60
  23   3 -13   -2.40    3.30
 -22  -4  13   -8.80    4.30
  22   4 -13   -2.30    3.10
 -21  -5  13   -4.00    4.40
  21   5 -13   -6.20    3.10
 -20  -6  13   83.29    6.80
  20   6 -13   89.59    7.10
 -19  -7  13    5.30    4.60
 -19  -7  13   -3.10    2.40
 -19  -7  13    3.60    3.70
  19   7 -13    1.20    3.30
 -18  -8  13    6.10    4.00
 -18  -8  13   -3.50    4.50
 -18  -8  13   -0.10    2.90
  18   8 -13   -0.30    3.40
 -17  -9  13   39.30    5.80
 -17  -9  13   43.10    5.30
  17   9 -13   35.60    4.70
 -16 -10  13   47.20    6.00
  16  10 -13   43.70    5.10
 -15 -11  13   77.89    6.90
  15  11 -13   62.19    6.00
 -14 -12  13    2.60    5.10
  14  12 -13    3.20    4.20
 -13 -13  13    5.20    5.60
 -13 -13  13    9.40    5.50
  13  13 -13    8.00    4.50
 -12 -14  13   15.50    5.90
 -12 -14  13   13.40    6.10
  12  14 -13    7.80    4.80
 -11 -15  13   11.20    6.60
 -11 -15  13   18.60    5.90
  11  15 -13    9.60    5.50
 -10 -16  13    7.20    5.80
 -10 -16  13   -3.40    6.00
  10  16 -13   -7.50    5.10
 -28   0  14   43.00    6.10
 -27  -1  14   -7.40    4.90
 -26  -2  14    1.00    4.90
 -25  -3  14   -0.80    5.00
 -24  -4  14   16.20    5.30
 -23  -5  14    4.00    4.90
 -22  -6  14    4.90    4.90
  22   6 -14   -1.50    3.60
 -21  -7  14   11.60    5.20
  21   7 -14    0.90    3.50
 -20  -8  14   31.20    5.80
  20   8 -14   28.60    4.50
 -19  -9  14   22.90    5.60
  19   9 -14   13.90    4.10
 -18 -10  14   13.00    5.30
  18  10 -14    7.00    4.00
 -17 -11  14    6.40    5.50
  17  11 -14    4.20    4.20
 -16 -12  14    1.90    5.30
  16  12 -14    2.00    4.30
 -15 -13  14   13.00    6.20
 -15 -13  14   17.40    6.10
  15  13 -14   16.80    5.10
 -14 -14  14   -2.40    5.70
 -14 -14  14    5.70    6.00
  14  14 -14   -3.70    4.50
 -13 -15  14    9.00    6.10
 -13 -15  14   -2.30    5.90
  13  15 -14   -6.80    5.20
 -28  -2  15    8.60    5.50
 -27  -3  15    7.80    5.40
 -26  -4  15   -2.30    5.20
 -25  -5  15    9.30    5.30
 -24  -6  15   -1.60    5.10
 -23  -7  15   27.40    5.90
 -22  -8  15    2.10    5.30
 -21  -9  15   19.10    5.70
 -20 -10  15  -11.70    5.20
 -19 -11  15    5.90    5.80
 -18 -12  15   -4.30    5.30
 -17 -13  15   10.90    6.10
 -16 -14  15    2.60    6.20
 -16 -14  15    2.40    6.30
 -27  -5  16   14.80    5.80
 -26  -6  16    0.00    5.50
 -25  -7  16    6.50    5.70
 -24  -8  16    9.90    5.70
 -23  -9  16   22.70    6.20
 -22 -10  16   -3.40    5.70
 -21 -11  16    2.40    5.80
 -19 -13  15    9.30    6.10
 -20 -12  15   -2.50    5.70
 -21 -11  15   19.20    6.30
 -22 -10  15    1.80    5.60
 -23  -9  15   11.40    5.90
 -24  -8  15    5.00    5.50
 -25  -7  15   19.00    5.80
 -26  -6  15    3.60    5.40
 -27  -5  15    0.20    5.50
 -28  -4  15    3.20    5.60
  15  15 -14   -3.10    4.90
  16  14 -14    4.50    5.10
 -16 -14  14    4.40    6.20
  17  13 -14    7.10    4.90
 -17 -13  14    7.90    5.80
  18  12 -14    1.40    4.50
 -18 -12  14   -4.40    5.80
  19  11 -14   -4.80    4.00
 -19 -11  14    8.10    5.70
  20  10 -14    9.60    4.30
 -20 -10  14    2.40    5.40
  21   9 -14   -2.20    4.00
 -21  -9  14   -9.10    5.20
 -22  -8  14   30.70    5.90
 -23  -7  14   -3.10    5.00
 -24  -6  14   -2.00    5.00
 -25  -5  14    1.20    5.20
 -26  -4  14   21.60    5.70
 -27  -3  14   -0.40    5.20
 -28  -2  14    2.00    5.30
  12  16 -13   -4.90    5.00
 -12 -16  13    0.90    5.80
 -12 -16  13   -0.20    6.50
  13  15 -13    7.10    5.40
 -13 -15  13   11.40    5.90
 -13 -15  13   17.80    6.60
  14  14 -13    9.10    4.90
 -14 -14  13   10.20    5.90
 -14 -14  13    8.40    5.80
  15  13 -13   -2.20    4.50
 -15 -13  13    2.50    5.50
  16  12 -13   -1.30    4.00
 -16 -12  13   -4.90    5.10
  17  11 -13   30.70    4.80
 -17 -11  13   28.20    6.00
  18  10 -13   17.40    4.40
 -18 -10  13   30.70    5.80
  19   9 -13   -0.10    3.70
 -19  -9  13    2.10    5.20
  20   8 -13    1.80    3.70
 -20  -8  13    4.60    5.00
  21   7 -13    2.10    3.60
 -21  -7  13    6.20    4.90
  22   6 -13   43.20    4.90
 -22  -6  13   46.20    6.00
  23   5 -13    1.10    3.50
 -23  -5  13   -3.20    4.70
 -24  -4  13   -1.70    4.90
 -25  -3  13    6.80    4.90
 -26  -2  13   -2.20    4.90
 -27  -1  13   12.20    5.20
 -28   0  13   -6.40    5.00
 -29   1  13   17.00    5.70
  10  16 -12   12.20    5.60
 -10 -16  12   12.10    6.40
 -10 -16  12   18.40    5.80
  11  15 -12   -4.10    4.70
 -11 -15  12   -9.00    5.40
 -11 -15  12   -1.30    5.30
  12  14 -12   -0.20    4.50
 -12 -14  12    3.30    5.30
 -12 -14  12    4.80    5.70
  13  13 -12   -0.30    4.10
 -13 -13  12   -0.20    5.00
  14  12 -12   91.69    7.30
 -14 -12  12  122.49   10.20
  15  11 -12    8.40    4.10
 -15 -11  12    4.20    5.00
  16  10 -12    0.00    3.70
 -16 -10  12   -4.50    4.80
  17   9 -12   -3.60    3.40
 -17  -9  12   -4.60    4.50
  18   8 -12   55.79    5.10
 -18  -8  12   56.99    6.00
 -18  -8  12   54.49    5.30
 -18  -8  12   44.50    4.10
  19   7 -12   79.49    7.10
 -19  -7  12   72.69    5.50
 -19  -7  12   75.99    6.50
 -19  -7  12   76.09    6.20
  20   6 -12   -1.10    3.30
 -20  -6  12   -2.40    4.40
 -20  -6  12    3.00    3.70
  21   5 -12   12.70    3.70
 -21  -5  12   15.00    4.10
 -21  -5  12   15.20    4.90
  22   4 -12    0.00    3.70
 -22  -4  12    6.60    4.60
  23   3 -12   20.60    4.30
 -23  -3  12   24.00    5.00
  24   2 -12    8.90    4.10
 -24  -2  12   10.50    4.70
 -25  -1  12   10.70    5.00
 -26   0  12    1.20    4.80
 -27   1  12   22.30    5.30
 -28   2  12   -0.20    5.10
   7  17 -11   -3.60    5.50
  -7 -17  11    0.30    6.50
   8  16 -11   -5.60    4.70
  -8 -16  11    9.50    5.00
  -8 -16  11   -0.20    6.00
   9  15 -11   -7.70    4.30
  -9 -15  11   16.60    5.30
  -9 -15  11    3.70    5.80
  10  14 -11   15.80    4.70
 -10 -14  11   27.40    5.60
 -10 -14  11    9.60    5.40
  11  13 -11   40.10    5.40
 -11 -13  11   50.19    6.10
 -11 -13  11   34.10    5.80
  12  12 -11    8.60    4.00
 -12 -12  11   21.20    5.30
  13  11 -11   17.70    4.20
 -13 -11  11   13.70    4.80
  14  10 -11   10.60    3.60
 -14 -10  11    7.40    4.70
  15   9 -11   24.80    4.10
 -15  -9  11   25.80    4.80
 -15  -9  11   28.00    4.40
  16   8 -11    9.00    3.60
 -16  -8  11   12.90    4.30
 -16  -8  11   13.30    2.90
 -16  -8  11    8.50    3.50
  17   7 -11   49.20    4.70
 -17  -7  11   62.49    5.70
 -17  -7  11   51.59    4.90
 -17  -7  11   63.39    5.20
  18   6 -11   22.40    3.70
 -18  -6  11   16.10    3.80
 -18  -6  11   17.60    4.60
  19   5 -11   21.00    3.90
 -19  -5  11   27.70    4.30
 -19  -5  11   19.30    4.50
  20   4 -11    8.00    3.60
 -20  -4  11   -4.90    4.00
 -20  -4  11   -1.40    3.60
  21   3 -11   40.10    4.70
 -21  -3  11   56.19    5.20
 -21  -3  11   46.60    5.30
  22   2 -11   59.59    5.30
 -22  -2  11   59.99    5.80
 -22  -2  11   64.19    5.70
  23   1 -11   15.00    4.10
 -23  -1  11   11.80    4.60
  24   0 -11   -1.10    3.90
 -24   0  11   -0.10    4.30
 -25   1  11   17.00    7.80
 -25   1  11   17.10    5.00
 -26   2  11   86.79   11.00
 -26   2  11   87.49    7.40
 -27   3  11    4.60    5.10
 -27   3  11  -10.50    7.90
 -28   4  11    7.10    5.40
 -28   4  11    1.50    8.40
   5  17 -10    2.60    5.60
  -5 -17  10   -2.20    5.90
   6  16 -10   -1.20    4.90
  -6 -16  10    4.50    4.80
  -6 -16  10   -5.70    5.90
   7  15 -10    8.50    5.20
  -7 -15  10   28.40    5.30
  -7 -15  10   26.00    5.90
   8  14 -10   20.20    5.00
  -8 -14  10   16.00    4.80
  -8 -14  10   20.50    5.80
   9  13 -10   20.90    4.60
  -9 -13  10   30.40    5.30
  -9 -13  10   23.90    5.50
  10  12 -10    0.20    3.70
 -10 -12  10   -3.00    4.30
  11  11 -10   32.30    4.60
 -11 -11  10   24.40    4.80
  12  10 -10   -0.60    3.30
 -12 -10  10    6.80    4.10
  13   9 -10   59.29    4.90
 -13  -9  10   60.09    5.70
 -13  -9  10   47.80    4.90
  14   8 -10   -1.40    2.90
 -14  -8  10   -2.50    3.30
 -14  -8  10   -2.00    2.40
 -14  -8  10   -2.20    3.60
  15   7 -10   13.10    3.30
 -15  -7  10   15.70    3.50
 -15  -7  10   12.60    2.70
 -15  -7  10    8.00    4.00
  16   6 -10    7.80    3.00
 -16  -6  10   11.60    3.70
 -16  -6  10    6.10    2.40
 -16  -6  10   10.20    3.30
  17   5 -10   33.20    4.00
 -17  -5  10   38.30    4.30
 -17  -5  10   33.00    4.50
  18   4 -10  169.68    9.30
 -18  -4  10  177.78    9.30
 -18  -4  10  172.08    9.80
  19   3 -10    0.70    3.40
 -19  -3  10   -0.40    3.40
 -19  -3  10   -1.20    3.60
  20   2 -10    0.00    3.30
 -20  -2  10   -0.10    3.50
 -20  -2  10   -3.00    3.80
  21   1 -10   -4.40    3.40
 -21  -1  10   -2.40    3.50
 -21  -1  10    1.00    3.90
  22   0 -10   54.29    5.20
 -22   0  10   59.09    8.00
 -22   0  10   50.59    5.40
 -22   0  10   42.10    5.00
  23  -1 -10   13.10    4.40
 -23   1  10   -1.80    6.70
 -23   1  10   10.50    4.50
  24  -2 -10    7.30    4.30
 -24   2  10    5.30    4.50
 -24   2  10   -0.30    6.70
 -25   3  10   15.80    5.10
 -25   3  10   18.20    7.80
 -26   4  10   26.70    5.70
 -26   4  10   41.60    8.60
 -27   5  10    1.40    8.30
 -27   5  10    8.50    5.20
   3  17  -9   -4.50    5.40
  -3 -17   9   -1.00    6.00
   4  16  -9    0.50    4.60
  -4 -16   9    0.00    5.40
  -4 -16   9    1.30    4.60
   5  15  -9   43.40    6.10
  -5 -15   9   37.40    5.30
  -5 -15   9   48.70    6.50
   6  14  -9   -4.40    3.90
  -6 -14   9   -3.00    4.60
  -6 -14   9    2.70    4.20
   7  13  -9   26.00    4.80
  -7 -13   9   28.60    5.20
  -7 -13   9   27.50    4.80
   8  12  -9    1.90    3.70
  -8 -12   9   -4.80    4.30
  -8 -12   9   -1.80    4.00
   9  11  -9   28.30    4.10
  -9 -11   9   21.00    4.70
  10  10  -9   69.39    5.40
 -10 -10   9   76.59    6.40
 -10 -10   9   72.09    5.80
  11   9  -9   -0.30    2.80
 -11  -9   9   -5.60    3.40
 -11  -9   9    3.60    2.70
 -11  -9   9   -2.70    3.10
  12   8  -9   20.20    3.40
 -12  -8   9   22.70    3.80
 -12  -8   9   21.00    3.20
 -12  -8   9   20.20    3.60
  13   7  -9   45.30    4.10
 -13  -7   9   39.00    3.60
 -13  -7   9   41.50    4.40
 -13  -7   9   44.90    4.20
  14   6  -9  249.18   11.00
 -14  -6   9  235.38   11.30
 -14  -6   9  253.27   11.20
 -14  -6   9  233.88   10.30
  15   5  -9   -3.90    2.60
 -15  -5   9   -2.00    3.20
 -15  -5   9    4.10    2.90
  16   4  -9    5.80    3.00
 -16  -4   9    9.30    3.10
 -16  -4   9    4.30    3.20
  17   3  -9   23.00    3.60
 -17  -3   9   23.50    3.70
 -17  -3   9   25.80    3.90
  18   2  -9   91.89    6.90
 -18  -2   9   83.49    7.10
 -18  -2   9   97.89    7.00
  19   1  -9    4.50    3.40
 -19  -1   9    4.30    3.50
 -19  -1   9    7.80    3.50
  20   0  -9   -1.30    3.50
 -20   0   9   -4.00    3.60
 -20   0   9   -3.00    5.20
 -20   0   9    3.70    3.50
  21  -1  -9   30.50    4.40
 -21   1   9   27.20    4.20
 -21   1   9   26.50    6.70
 -21   1   9   22.80    4.40
  22  -2  -9   42.40    5.00
 -22   2   9   40.50    5.20
 -22   2   9   47.10    7.60
 -22   2   9   42.10    5.20
  23  -3  -9   24.80    4.90
 -23   3   9   38.00    7.90
 -23   3   9   37.20    5.10
  24  -4  -9    2.30    4.40
 -24   4   9    7.80    4.70
 -24   4   9    4.90    7.30
 -25   5   9   21.70    5.50
 -25   5   9   24.10    8.30
 -26   6   9   -7.60    7.90
 -26   6   9    3.30    5.00
 -27   7   9    8.30    8.60
 -27   7   9   11.20    5.50
   0  18  -8   -0.70    5.40
   0 -18   8  -14.90    5.60
   1  17  -8   13.70    5.60
  -1 -17   8   11.00    6.50
   2  16  -8    3.20    5.30
  -2 -16   8    2.10    5.20
   3  15  -8    9.30    4.90
  -3 -15   8   26.90    4.70
  -3 -15   8   17.20    5.40
   4  14  -8   11.30    4.50
  -4 -14   8   15.00    5.40
  -4 -14   8   15.40    4.20
   5  13  -8   32.90    4.90
  -5 -13   8   35.40    4.60
  -5 -13   8   32.10    5.50
   6  12  -8   39.70    4.70
  -6 -12   8   26.80    4.60
  -6 -12   8   35.70    4.70
   7  11  -8    9.10    3.60
  -7 -11   8   11.30    4.00
  -7 -11   8   13.20    4.00
   8  10  -8   64.19    5.10
  -8 -10   8   53.69    4.90
  -8 -10   8   66.79    5.80
   9   9  -8   -3.70    2.50
  -9  -9   8   -1.30    2.70
  -9  -9   8   -3.00    2.50
  -9  -9   8   -2.00    3.10
  10   8  -8  270.37   11.80
 -10  -8   8  271.57   11.80
 -10  -8   8  253.87   11.50
 -10  -8   8  257.67   12.00
  11   7  -8   16.70    3.00
 -11  -7   8   15.10    3.10
 -11  -7   8   17.60    2.70
 -11  -7   8   14.90    3.00
  12   6  -8   62.69    5.70
  12   6  -8   55.49    4.90
  12   6  -8   57.09    4.90
 -12  -6   8   59.09    5.10
 -12  -6   8   48.10    3.70
 -12  -6   8   46.00    4.20
  13   5  -8  224.28   12.70
  13   5  -8  247.38   10.50
  13   5  -8  243.48   10.50
 -13  -5   8  238.78   10.90
 -13  -5   8  253.27   10.70
 -13  -5   8  213.98    9.80
  14   4  -8  225.48   12.90
  14   4  -8  243.58   10.90
  14   4  -8  246.78   10.90
 -14  -4   8  268.57   11.00
 -14  -4   8  238.08   11.10
  15   3  -8  208.58    9.80
  15   3  -8  207.48    9.80
 -15  -3   8  214.38    9.80
 -15  -3   8  203.88   10.00
  16   2  -8   32.20    3.70
 -16  -2   8   42.00    4.00
 -16  -2   8   44.00    4.10
  17   1  -8   36.70    4.00
 -17  -1   8   27.40    3.80
 -17  -1   8   39.10    5.50
 -17  -1   8   37.20    4.00
  18   0  -8    9.00    3.50
 -18   0   8   16.30    5.60
 -18   0   8    8.40    3.50
 -18   0   8   15.00    3.50
  19  -1  -8   59.69    5.20
 -19   1   8   70.29    5.40
 -19   1   8   75.59    7.50
 -19   1   8   71.89    6.40
  20  -2  -8    1.20    3.80
 -20   2   8   -2.00    3.60
 -20   2   8    2.70    3.60
 -20   2   8   -0.30    5.60
  21  -3  -8   14.00    4.20
 -21   3   8   18.50    4.20
 -21   3   8   17.80    6.30
 -21   3   8   18.70    4.50
  22  -4  -8   15.60    4.40
 -22   4   8   15.50    4.40
 -22   4   8   19.70    7.10
 -22   4   8   10.30    4.40
  23  -5  -8   29.70    5.20
 -23   5   8   29.90    5.20
 -23   5   8   31.70    7.80
 -24   6   8    7.80    4.80
 -24   6   8   -0.90    6.70
 -25   7   8   19.30    7.90
 -25   7   8   14.60    5.40
 -26   8   8   21.90    5.90
 -26   8   8   16.00    8.40
  -2  18  -7    4.40    5.90
   2 -18   7    4.00    5.90
  -1  17  -7   -2.50    5.50
   1 -17   7    6.50    5.70
   0  16  -7   -2.80    5.00
   0 -16   7    2.80    5.30
   1  15  -7   -2.40    4.50
  -1 -15   7    2.60    5.20
  -1 -15   7   -5.80    4.00
   2  14  -7  134.19   10.20
  -2 -14   7  159.88    9.30
  -2 -14   7  149.59   10.70
   3  13  -7   16.40    4.20
  -3 -13   7    6.60    3.70
  -3 -13   7    1.20    4.50
   4  12  -7    1.80    3.50
   4  12  -7    3.20    4.10
  -4 -12   7   -0.90    4.00
  -4 -12   7    1.10    3.50
   5  11  -7   27.60    4.10
   5  11  -7   25.00    4.70
  -5 -11   7   36.10    4.20
  -5 -11   7   30.70    4.50
   6  10  -7  344.97   15.10
   6  10  -7  350.36   14.90
  -6 -10   7  327.97   14.50
  -6 -10   7  357.66   15.40
  -6 -10   7  329.37   15.00
   7   9  -7    7.20    2.70
   7   9  -7    7.20    3.20
  -7  -9   7   13.70    3.40
  -7  -9   7   11.10    2.80
  -7  -9   7    9.70    2.80
   8   8  -7   12.50    2.30
   8   8  -7   25.70    3.10
   8   8  -7   21.00    3.40
  -8  -8   7   20.80    3.10
  -8  -8   7   18.00    3.30
  -8  -8   7   21.50    3.10
   9   7  -7  142.99    7.20
  -9  -7   7  136.69    7.40
  -9  -7   7  135.59    6.90
  -9  -7   7  132.99    7.20
  10   6  -7   69.19    4.70
  10   6  -7   66.29    5.10
 -10  -6   7   75.79    4.70
 -10  -6   7   67.49    5.70
 -10  -6   7   76.99    5.20
  11   5  -7   96.29    7.10
  11   5  -7   94.39    5.60
  11   5  -7   93.09    5.50
 -11  -5   7   92.39    6.00
 -11  -5   7  103.89    5.80
 -11  -5   7   93.39    5.20
  12   4  -7   73.99    5.00
  12   4  -7   73.99    6.60
  12   4  -7   73.89    5.30
 -12  -4   7   85.99    5.20
 -12  -4   7   69.99    4.20
 -12  -4   7   77.29    5.40
  13   3  -7  385.66   19.10
  13   3  -7  409.06   16.50
  13   3  -7  413.66   16.50
 -13  -3   7  403.66   16.60
 -13  -3   7  439.16   16.60
  14   2  -7   31.10    4.20
  14   2  -7   31.80    3.20
  14   2  -7   31.90    3.30
 -14  -2   7   30.90    3.40
 -14  -2   7   32.60    3.40
  15   1  -7  144.59    7.20
 -15  -1   7  119.09    7.00
 -15  -1   7  122.99    7.10
 -15  -1   7  107.19    8.60
  16   0  -7   -3.70    2.80
 -16   0   7   -7.20    2.60
 -16   0   7   -1.70    2.60
 -16   0   7   -3.10    3.90
  17  -1  -7   40.50    4.20
 -17   1   7   35.60    4.10
 -17   1   7   46.00    6.00
 -17   1   7   43.70    4.10
  18  -2  -7  124.89    8.20
 -18   2   7  133.59    7.80
 -18   2   7  121.89    8.00
 -18   2   7  121.19   10.20
  19  -3  -7   47.10    4.80
 -19   3   7   47.00    6.40
  20  -4  -7   -1.40    4.10
 -20   4   7    1.70    5.40
 -20   4   7    2.80    3.90
 -20   4   7   -2.70    3.40
  21  -5  -7    9.50    4.90
 -21   5   7   13.30    6.10
 -21   5   7   11.20    4.30
 -21   5   7    7.20    4.30
  22  -6  -7  114.69   10.00
 -22   6   7  114.09   10.20
  23  -7  -7   10.20    5.30
 -23   7   7    3.80    6.60
 -24   8   7   11.20    7.30
 -25   9   7    2.50    7.50
  -4  18  -6    3.80    5.80
   4 -18   6   -5.90    5.90
  -3  17  -6   -0.90    5.10
   3 -17   6    7.00    6.20
  -2  16  -6   30.30    5.80
   2 -16   6   39.40    6.40
  -1  15  -6    0.80    4.80
   1 -15   6    8.10    4.90
   0  14  -6    2.00    4.40
   0 -14   6   -2.10    4.40
   1  13  -6   55.59    6.30
   1  13  -6   59.09    5.90
  -1 -13   6   67.39    5.30
  -1 -13   6   59.59    6.20
   2  12  -6   98.49    8.40
   2  12  -6   96.09    7.60
  -2 -12   6   99.89    8.30
  -2 -12   6  104.49    7.20
   3  11  -6  150.68    9.30
   3  11  -6  155.78    8.70
  -3 -11   6  146.19    9.00
  -3 -11   6  139.99    8.20
   4  10  -6   -5.30    2.70
   4  10  -6   -2.60    3.30
  -4 -10   6   -0.70    2.90
  -4 -10   6    0.70    2.90
  -4 -10   6    0.70    2.60
   5   9  -6   28.20    3.80
   5   9  -6   26.60    3.30
   5   9  -6   22.30    2.90
  -5  -9   6   26.20    3.30
  -5  -9   6   28.60    3.70
  -5  -9   6   22.10    3.00
   6   8  -6   -2.40    2.50
   6   8  -6   -2.40    2.10
   6   8  -6   -2.80    2.00
  -6  -8   6   -1.30    2.10
  -6  -8   6   -4.80    2.50
  -6  -8   6   -3.00    2.20
   7   7  -6   86.39    5.20
   7   7  -6  107.99    5.80
   7   7  -6   99.99    6.10
  -7  -7   6   93.99    6.10
  -7  -7   6  101.19    5.70
  -7  -7   6  108.79    5.80
   8   6  -6    0.40    0.90
   8   6  -6    2.40    2.00
   8   6  -6    0.60    2.30
  -8  -6   6    2.90    2.20
  -8  -6   6    0.80    2.00
  -8  -6   6    2.00    2.30
   9   5  -6  149.69    7.30
   9   5  -6  167.98    7.50
  -9  -5   6  175.68    7.50
  -9  -5   6  155.68    7.20
  -9  -5   6  148.09    7.50
  10   4  -6   77.29    4.70
  10   4  -6   61.29    4.30
  10   4  -6   55.99    5.70
 -10  -4   6   56.29    3.80
 -10  -4   6   58.49    4.70
 -10  -4   6   62.99    4.50
  11   3  -6  235.08   10.20
  11   3  -6  237.58   10.20
  11   3  -6  229.98   12.00
 -11  -3   6  237.08   10.20
 -11  -3   6  247.78   10.20
  12   2  -6   11.10    3.20
  12   2  -6   11.00    2.30
  12   2  -6   11.60    2.50
 -12  -2   6   12.10    2.60
 -12  -2   6   16.50    2.70
  13   1  -6   94.19    5.90
 -13  -1   6   84.39    5.70
 -13  -1   6   98.99    7.60
 -13  -1   6   95.29    5.90
  14   0  -6  391.26   16.20
  14   0  -6  400.46   18.60
 -14   0   6  426.46   16.40
 -14   0   6  382.96   16.20
 -14   0   6  399.26   18.80
  15  -1  -6   -0.70    2.80
  15  -1  -6    2.40    3.20
 -15   1   6    2.10    2.60
 -15   1   6    0.30    3.60
 -15   1   6    0.00    2.70
  16  -2  -6   24.60    3.50
 -16   2   6   14.30    4.70
 -16   2   6   15.10    3.20
 -16   2   6   20.40    3.30
  17  -3  -6    6.70    3.60
 -17   3   6   -3.80    4.40
 -17   3   6    4.30    3.20
 -17   3   6    5.90    3.10
  18  -4  -6  284.97   13.60
 -18   4   6  288.07   13.20
 -18   4   6  286.97   15.70
  19  -5  -6   14.70    4.50
 -19   5   6    4.60    5.10
 -19   5   6    4.80    3.70
  20  -6  -6    1.10    4.50
 -20   6   6   -1.00    5.50
 -20   6   6    3.10    4.20
  21  -7  -6   20.20    5.50
 -21   7   6   19.40    6.20
  22  -8  -6   25.20    5.90
 -22   8   6   39.00    7.40
 -23   9   6   32.50    7.60
 -24  10   6    0.50    6.80
  -5  17  -5   18.90    6.10
   5 -17   5    6.10    5.60
  -4  16  -5   -0.40    5.10
   4 -16   5    3.60    5.10
  -3  15  -5   14.30    5.40
   3 -15   5   31.50    6.10
  -2  14  -5    6.50    4.30
  -2  14  -5    8.90    5.10
   2 -14   5    8.30    4.60
  -1  13  -5   47.00    5.40
  -1  13  -5   53.39    6.20
   1 -13   5   37.30    5.20
   0  12  -5   -0.80    4.00
   0  12  -5    5.20    3.60
   0 -12   5    2.00    3.40
   0 -12   5    3.40    3.90
   1  11  -5  148.49    9.00
   1  11  -5  137.89    8.10
  -1 -11   5  137.99    8.60
  -1 -11   5  145.09    8.00
   2  10  -5    8.50    2.80
   2  10  -5   11.00    3.10
   2  10  -5    3.80    3.40
  -2 -10   5    8.70    2.80
  -2 -10   5    8.80    2.50
  -2 -10   5   10.40    3.40
   3   9  -5  112.89    6.20
   3   9  -5  111.79    7.10
   3   9  -5  113.49    6.60
  -3  -9   5  112.89    6.50
  -3  -9   5  104.69    6.10
  -3  -9   5  105.69    6.50
  -3  -9   5  103.29    6.80
   4   8  -5  119.29    6.30
   4   8  -5  121.49    6.50
   4   8  -5  111.89    7.00
  -4  -8   5  113.69    6.80
  -4  -8   5  123.09    6.50
  -4  -8   5  130.09    6.40
   5   7  -5   91.29    5.90
   5   7  -5   95.99    5.50
   5   7  -5   90.89    5.30
  -5  -7   5   97.79    5.50
  -5  -7   5  100.39    5.60
  -5  -7   5   93.79    5.70
   6   6  -5   89.99    4.90
   6   6  -5   87.89    5.10
   6   6  -5   85.49    5.40
  -6  -6   5   92.39    5.20
  -6  -6   5   87.69    5.10
  -6  -6   5   89.39    5.30
   7   5  -5   41.70    3.20
   7   5  -5   46.10    3.80
  -7  -5   5   46.40    3.90
  -7  -5   5   46.50    3.40
  -7  -5   5   53.29    3.70
   8   4  -5  223.08    9.10
   8   4  -5  192.28    9.00
   8   4  -5  219.28    9.30
  -8  -4   5  236.18    9.30
  -8  -4   5  227.78    9.00
  -8  -4   5  221.18    9.40
   9   3  -5   47.40    3.70
   9   3  -5   47.00    3.80
  -9  -3   5   45.60    3.90
  -9  -3   5   42.40    3.70
  10   2  -5  459.25   20.30
  10   2  -5  462.05   17.70
  10   2  -5  443.76   17.80
 -10  -2   5  468.25   17.80
 -10  -2   5  441.36   17.80
  11   1  -5    4.10    2.20
  11   1  -5    0.40    0.60
 -11  -1   5    2.10    2.90
 -11  -1   5    1.80    2.20
 -11  -1   5    1.70    2.00
  12   0  -5   -4.50    2.50
  12   0  -5   -5.20    2.40
 -12   0   5   -4.00    2.30
 -12   0   5   -7.10    2.10
 -12   0   5   -1.60    3.10
  13  -1  -5   78.09    5.50
  13  -1  -5   82.69    6.40
 -13   1   5   79.39    5.50
 -13   1   5   67.19    5.20
 -13   1   5   78.09    6.20
  14  -2  -5  299.27   13.80
  14  -2  -5  361.96   16.30
  14  -2  -5  360.86   14.30
 -14   2   5  325.47   14.00
 -14   2   5  321.87   16.30
 -14   2   5  342.47   14.00
  15  -3  -5  107.89    6.70
  15  -3  -5  119.99    7.60
 -15   3   5  110.49    8.60
 -15   3   5  117.09    7.00
  16  -4  -5    4.60    3.70
 -16   4   5    0.40    2.80
 -16   4   5    2.80    4.10
  17  -5  -5   43.10    5.20
 -17   5   5   53.09    6.10
 -17   5   5   60.69    5.10
  18  -6  -5   68.09    6.10
 -18   6   5   63.69    7.10
 -18   6   5   64.29    5.80
  19  -7  -5   57.49    6.10
 -19   7   5   46.60    6.80
 -19   7   5   48.30    5.40
  20  -8  -5   10.80    5.10
 -20   8   5   15.00    5.90
  21  -9  -5    8.90    5.50
 -21   9   5   14.80    6.40
  22 -10  -5    2.60    6.10
 -22  10   5   -0.30    6.20
 -23  11   5   10.80    6.80
  -7  17  -4   20.70    6.10
   7 -17   4   16.30    6.00
  -6  16  -4    8.50    5.00
   6 -16   4    0.30    5.40
  -5  15  -4   37.00    5.50
   5 -15   4   42.10    6.10
  -4  14  -4    9.80    4.20
  -4  14  -4   15.00    5.30
   4 -14   4    1.50    5.00
  -3  13  -4    0.00    4.50
  -3  13  -4   -4.30    4.00
   3 -13   4   -3.80    3.90
  -2  12  -4  118.89    8.70
  -2  12  -4  114.29    8.20
   2 -12   4  107.39    8.50
  -1  11  -4   68.19    5.50
  -1  11  -4   79.99    7.10
   1 -11   4   71.19    6.20
   1 -11   4   62.09    5.20
   0  10  -4    2.70    2.40
   0  10  -4    4.70    3.50
   0  10  -4    6.70    2.40
   0 -10   4   10.60    2.80
   0 -10   4    2.00    3.20
   0 -10   4    5.80    2.40
   1   9  -4   62.59    4.80
   1   9  -4   60.39    5.10
   1   9  -4   60.99    4.90
  -1  -9   4   61.09    4.70
  -1  -9   4   66.89    5.70
  -1  -9   4   57.69    4.70
   2   8  -4  603.64   23.90
   2   8  -4  633.44   24.10
   2   8  -4  625.24   24.00
  -2  -8   4  620.14   24.10
  -2  -8   4  598.14   23.90
  -2  -8   4  611.34   25.10
  -2  -8   4  621.14   23.90
   3   7  -4  140.09    7.50
   3   7  -4  146.09    7.00
   3   7  -4  141.59    7.00
  -3  -7   4  150.58    6.90
  -3  -7   4  163.68    7.30
  -3  -7   4  147.39    7.20
   4   6  -4    5.70    1.90
   4   6  -4    4.70    1.90
   4   6  -4    6.10    2.20
  -4  -6   4    2.20    1.90
  -4  -6   4    2.20    1.90
  -4  -6   4    4.50    1.80
   5   5  -4  200.68    8.30
   5   5  -4  185.18    8.40
  -5  -5   4  198.48    8.40
  -5  -5   4  189.88    8.30
  -5  -5   4  205.08    8.30
   6   4  -4  181.38    8.40
   6   4  -4  208.18    8.50
  -6  -4   4  216.28    8.60
  -6  -4   4  210.68    8.40
  -6  -4   4  205.38    8.60
   7   3  -4    7.20    1.60
   7   3  -4    1.90    1.40
   7   3  -4    1.40    0.70
  -7  -3   4    3.20    1.60
  -7  -3   4    5.30    1.40
  -7  -3   4    5.90    1.60
   8   2  -4    1.20    1.60
   8   2  -4    0.40    0.90
   8   2  -4   -1.00    1.10
  -8  -2   4   -0.20    1.70
  -8  -2   4   -2.00    1.60
   9   1  -4  173.78    7.60
  -9  -1   4  172.38    8.90
  -9  -1   4  172.08    7.60
  -9  -1   4  165.78    7.40
  10   0  -4  204.28    8.70
  10   0  -4  205.58   10.10
 -10   0   4  211.18    8.80
 -10   0   4  193.48   10.00
 -10   0   4  183.98    8.60
  11  -1  -4  598.04   22.80
  11  -1  -4  575.84   25.80
 -11   1   4  572.34   25.80
 -11   1   4  614.14   22.80
 -11   1   4  577.54   22.70
  12  -2  -4  226.88   10.40
  12  -2  -4  237.18   11.80
  12  -2  -4  202.88   10.00
 -12   2   4  241.28   11.90
 -12   2   4  252.27   10.30
  13  -3  -4  178.48    8.60
  13  -3  -4  149.69    7.90
 -13   3   4  173.18    8.20
 -13   3   4  161.78    9.60
  14  -4  -4    0.10    2.40
  14  -4  -4    1.20    3.00
 -14   4   4    1.30    3.40
 -14   4   4   -4.50    2.50
  15  -5  -4   41.30    4.50
 -15   5   4   44.50    5.30
 -15   5   4   43.50    4.30
  16  -6  -4    0.00    3.90
 -16   6   4   -1.40    3.30
 -16   6   4    0.20    4.10
  17  -7  -4   70.29    6.10
 -17   7   4   64.79    6.90
 -17   7   4   53.09    5.20
  18  -8  -4   16.70    3.20
  18  -8  -4   10.00    4.90
 -18   8   4   17.10    4.30
 -18   8   4   12.60    5.40
  19  -9  -4   12.20    5.20
 -19   9   4   21.70    6.00
  20 -10  -4    3.30    5.40
 -20  10   4   -7.10    5.60
  21 -11  -4   12.30    6.00
 -21  11   4    9.20    6.50
  -9  17  -3    4.20    5.50
   9 -17   3   14.60    6.20
  -8  16  -3   -0.60    5.10
   8 -16   3    5.00    5.40
  -7  15  -3   19.20    5.00
   7 -15   3   14.90    5.30
  -6  14  -3   31.70    5.70
  -6  14  -3   21.70    5.10
   6 -14   3   34.10    5.80
  -5  13  -3    0.80    4.10
  -5  13  -3    5.60    4.80
   5 -13   3   -0.70    4.40
  -4  12  -3    3.20    4.10
  -4  12  -3   -0.10    3.50
   4 -12   3    0.60    3.90
  -3  11  -3   17.50    3.50
  -3  11  -3    6.00    4.00
   3 -11   3   14.10    3.60
  -2  10  -3  303.17   13.90
  -2  10  -3  300.77   13.20
  -2  10  -3  326.97   13.60
   2 -10   3  314.17   13.70
   2 -10   3  310.77   13.30
  -1   9  -3   -1.10    2.20
  -1   9  -3    0.40    2.80
  -1   9  -3   -1.40    2.30
   1  -9   3    2.90    2.10
   1  -9   3    0.80    2.40
   1  -9   3   -6.50    2.40
   1  -9   3   -1.80    2.60
   0   8  -3    2.10    2.00
   0   8  -3    1.70    1.90
   0   8  -3   -1.30    2.70
   0  -8   3   -4.90    2.10
   0  -8   3    0.40    1.70
   0  -8   3    0.90    1.90
   0  -8   3    0.10    2.50
   1   7  -3   13.00    2.40
   1   7  -3   16.60    2.30
   1   7  -3   14.30    2.70
  -1  -7   3   13.20    2.10
  -1  -7   3   10.70    2.20
  -1  -7   3   12.80    2.50
  -1  -7   3   14.80    2.20
   2   6  -3  233.38    9.60
   2   6  -3  240.18    9.90
   2   6  -3  230.08    9.60
  -2  -6   3  230.08    9.70
  -2  -6   3  222.28    9.70
  -2  -6   3  234.48    9.60
   3   5  -3  501.25   18.80
   3   5  -3  487.05   18.80
   3   5  -3  492.75   18.80
  -3  -5   3  492.95   18.70
  -3  -5   3  480.95   18.70
  -3  -5   3  476.85   18.80
   4   4  -3   34.70    2.90
   4   4  -3   28.50    2.70
   4   4  -3   39.00    3.30
  -4  -4   3   35.00    2.40
  -4  -4   3   41.10    3.10
  -4  -4   3   43.40    2.80
   5   3  -3 1130.39   41.60
   5   3  -3 1057.99   41.10
  -5  -3   3 1133.79   41.60
  -5  -3   3 1124.99   41.60
  -5  -3   3 1123.49   41.10
   6   2  -3   97.79    4.60
   6   2  -3   83.69    5.50
   6   2  -3  104.69    4.80
  -6  -2   3   94.19    4.80
  -6  -2   3  100.19    4.80
   7   1  -3  384.86   14.80
   7   1  -3  397.06   14.90
  -7  -1   3  370.26   14.80
  -7  -1   3  399.56   14.90
  -7  -1   3  363.66   16.80
   8   0  -3   -0.60    1.80
   8   0  -3   -1.80    2.00
  -8   0   3    0.40    1.70
  -8   0   3    3.60    2.00
  -8   0   3   -1.60    1.50
   9  -1  -3  447.76   17.50
   9  -1  -3  446.26   19.80
  -9   1   3  454.95   17.40
  -9   1   3  441.16   19.70
  10  -2  -3  114.79    6.90
 -10   2   3  141.29    7.60
  11  -3  -3 1191.18   44.40
  11  -3  -3 1184.78   44.50
 -11   3   3 1185.38   44.40
 -11   3   3 1142.69   49.80
  12  -4  -3  139.09    7.60
  12  -4  -3  136.99    7.10
 -12   4   3  127.09    8.40
 -12   4   3  134.49    7.20
  13  -5  -3   91.19    6.60
  13  -5  -3   81.39    5.80
 -13   5   3   85.49    6.10
 -13   5   3   73.99    7.00
  14  -6  -3  179.28    9.40
 -14   6   3  155.38   10.20
 -14   6   3  162.18    8.80
  15  -7  -3   87.79    5.90
  15  -7  -3   91.19    8.30
 -15   7   3   99.79    7.10
 -15   7   3   87.39    8.30
  16  -8  -3    8.00    4.60
  16  -8  -3    5.20    2.80
 -16   8   3    8.10    3.50
 -16   8   3    6.20    4.60
  17  -9  -3    7.70    4.90
  17  -9  -3    0.60    3.00
 -17   9   3   -1.80    4.90
  18 -10  -3   18.10    5.60
 -18  10   3   15.20    5.70
  19 -11  -3    8.10    5.70
 -19  11   3    5.30    5.60
  20 -12  -3    6.00    5.70
 -20  12   3    0.40    6.00
 -11  17  -2    1.00    5.60
  11 -17   2   -8.80    5.50
 -10  16  -2   27.20    5.90
  10 -16   2   29.90    6.40
  -9  15  -2   -5.20    4.50
   9 -15   2   -2.00    5.10
  -8  14  -2   23.40    5.50
  -8  14  -2   18.30    4.70
   8 -14   2   30.00    5.30
  -7  13  -2   21.50    5.20
  -7  13  -2   22.30    4.70
   7 -13   2   10.00    4.70
  -6  12  -2   99.29    8.10
  -6  12  -2  105.79    8.60
   6 -12   2  114.79    8.70
  -5  11  -2   19.90    3.20
  -5  11  -2   16.50    4.20
  -5  11  -2   15.80    3.50
   5 -11   2   17.10    3.90
  -4  10  -2   -0.20    3.30
  -4  10  -2   -1.50    2.70
  -4  10  -2    1.80    2.50
   4 -10   2   -1.50    2.70
   4 -10   2    1.70    3.10
  -3   9  -2   32.60    3.40
  -3   9  -2   38.40    3.80
  -3   9  -2   39.80    4.00
   3  -9   2   32.10    3.30
   3  -9   2   36.20    3.70
   3  -9   2   42.10    4.00
  -2   8  -2  606.94   24.30
  -2   8  -2  629.54   24.10
  -2   8  -2  645.94   24.30
   2  -8   2  611.24   24.10
   2  -8   2  625.14   24.20
   2  -8   2  622.24   24.30
  -1   7  -2  149.49    7.60
  -1   7  -2  155.78    7.10
  -1   7  -2  158.78    7.10
   1  -7   2  140.59    7.30
   1  -7   2  163.58    7.10
   1  -7   2  154.98    7.40
   0   6  -2   55.39    4.20
   0   6  -2   49.40    3.60
   0   6  -2   44.40    3.50
   0  -6   2   46.00    3.80
   0  -6   2   48.20    3.40
   0  -6   2   50.69    3.40
   1   5  -2   26.50    2.30
   1   5  -2   23.50    2.40
   1   5  -2   21.40    2.10
  -1  -5   2   24.80    2.00
  -1  -5   2   25.00    2.20
  -1  -5   2   21.40    2.20
   2   4  -2  147.69    6.40
   2   4  -2  145.69    6.50
   2   4  -2  143.79    6.30
  -2  -4   2  144.59    6.30
  -2  -4   2  139.49    6.40
  -2  -4   2  159.68    6.50
   3   3  -2 1261.27   50.59
   3   3  -2 1409.36   50.59
   3   3  -2 1336.57   50.19
  -3  -3   2 1373.66   50.19
  -3  -3   2 1400.46   50.69
  -3  -3   2 1396.46   50.59
   4   2  -2  411.06   14.40
   4   2  -2  360.46   14.60
  -4  -2   2  372.16   14.60
  -4  -2   2  357.36   14.60
  -4  -2   2  410.06   14.40
   5   1  -2  805.42   30.40
   5   1  -2  816.02   30.40
  -5  -1   2  785.12   30.40
  -5  -1   2  844.42   30.40
   6   0  -2    5.30    2.20
  -6   0   2    4.30    2.00
   7  -1  -2  340.27   14.90
   7  -1  -2  329.67   13.20
  -7   1   2  322.97   14.80
  -7   1   2  345.17   13.20
   8  -2  -2  136.69    7.40
   8  -2  -2  140.29    6.60
  -8   2   2  133.59    7.20
  -8   2   2  133.19    6.30
   9  -3  -2  193.28    8.60
   9  -3  -2  193.98    8.90
  -9   3   2  192.78    9.90
  -9   3   2  211.68    8.70
  10  -4  -2  788.92   30.50
  10  -4  -2  786.72   30.50
  10  -4  -2  799.32   29.70
 -10   4   2  791.42   30.40
 -10   4   2  802.62   34.20
 -10   4   2  804.32   30.50
  11  -5  -2  166.38    8.50
  11  -5  -2  161.88    7.20
  11  -5  -2  157.18    7.90
 -11   5   2  161.88    7.90
 -11   5   2  164.18    9.10
 -11   5   2  151.48    7.80
  12  -6  -2   35.00    4.00
  12  -6  -2   51.39    4.20
 -12   6   2   28.70    3.50
 -12   6   2   55.09    4.90
 -12   6   2   35.90    4.40
  13  -7  -2   -2.40    2.30
  13  -7  -2   -2.90    3.50
 -13   7   2    1.10    2.70
 -13   7   2   -2.10    2.70
 -13   7   2   -2.80    3.50
  14  -8  -2  159.68   10.00
  14  -8  -2  145.29    8.00
 -14   8   2  160.18    8.80
 -14   8   2  154.58    8.90
 -14   8   2  136.89   10.00
  15  -9  -2    3.60    3.10
  15  -9  -2   -1.70    4.40
 -15   9   2   -1.00    3.50
 -15   9   2   -3.80    4.30
  16 -10  -2    8.10    4.90
 -16  10   2   12.10    4.10
 -16  10   2    5.40    4.80
  17 -11  -2   -0.20    5.20
 -17  11   2   -3.70    4.90
 -17  11   2    1.10    4.40
  18 -12  -2   25.80    6.30
 -18  12   2   24.00    6.10
 -18  12   2   21.10    5.60
  19 -13  -2   -2.90    5.90
 -19  13   2    1.20    5.80
 -12  16  -1   -3.40    5.40
  12 -16   1   -5.70    5.80
 -11  15  -1   13.40    5.30
  11 -15   1   20.00    5.80
 -10  14  -1   30.90    5.30
  10 -14   1   35.40    6.00
  -9  13  -1   -0.60    3.70
  -9  13  -1    3.10    4.80
   9 -13   1    9.50    5.00
  -8  12  -1   75.39    6.20
  -8  12  -1   60.49    5.50
   8 -12   1   55.19    5.70
  -7  11  -1  190.58   10.70
  -7  11  -1  200.68    9.90
  -7  11  -1  190.78   10.20
   7 -11   1  219.78   10.90
  -6  10  -1   21.40    3.30
  -6  10  -1   21.70    4.10
  -6  10  -1   19.60    3.30
   6 -10   1   18.50    3.60
   6 -10   1   27.70    3.60
  -5   9  -1  382.56   15.70
  -5   9  -1  360.26   15.40
  -5   9  -1  381.26   15.30
   5  -9   1  341.37   15.10
   5  -9   1  390.86   15.40
   5  -9   1  380.56   15.70
  -4   8  -1   27.50    3.50
  -4   8  -1   32.10    3.20
  -4   8  -1   31.20    3.30
   4  -8   1   29.80    3.60
   4  -8   1   28.10    3.00
   4  -8   1   30.30    3.20
  -3   7  -1  288.97   12.20
  -3   7  -1  297.37   12.40
  -3   7  -1  298.57   12.20
   3  -7   1  316.67   12.30
   3  -7   1  293.97   12.10
   3  -7   1  290.77   12.40
  -2   6  -1    3.90    1.70
  -2   6  -1    4.10    2.00
  -2   6  -1    2.20    1.30
   2  -6   1    0.20    1.00
   2  -6   1    5.30    2.00
   2  -6   1    2.00    1.50
  -1   5  -1  133.79    6.00
  -1   5  -1  130.39    5.70
  -1   5  -1  129.29    5.70
   1  -5   1  122.29    5.80
   1  -5   1  120.69    5.90
   1  -5   1  125.29    5.60
   0   4  -1 1142.89   42.90
   0   4  -1 1111.89   42.60
   0   4  -1 1154.78   42.90
   0  -4   1 1158.18   42.90
   0  -4   1 1182.88   42.90
   1   3  -1  741.43   27.10
   1   3  -1  746.83   27.10
   1   3  -1  741.23   26.90
  -1  -3   1  726.23   27.10
  -1  -3   1  734.53   27.10
  -1  -3   1  660.53   26.90
   2   2  -1  210.18    7.70
   2   2  -1  198.48    7.70
   2   2  -1  178.88    7.70
  -2  -2   1  203.48    7.70
  -2  -2   1  205.18    7.70
  -2  -2   1  204.68    7.80
   3   1  -1  100.89    4.20
  -3  -1   1   99.39    4.20
  -3  -1   1   99.49    4.20
   4   0  -1   -0.90    1.20
   4   0  -1   -0.60    1.50
  -4   0   1   -1.60    1.30
  -4   0   1   -0.80    1.10
   5  -1  -1   10.60    2.10
   5  -1  -1    6.70    1.80
   5  -1  -1    7.70    1.40
  -5   1   1    5.80    2.00
  -5   1   1   11.80    1.90
   6  -2  -1   45.30    3.80
  -6   2   1   42.50    3.20
  -6   2   1   39.40    4.00
  -6   2   1   48.20    3.40
   7  -3  -1    3.80    1.50
   7  -3  -1    0.40    0.60
   7  -3  -1    4.30    2.20
  -7   3   1    2.20    1.40
  -7   3   1    5.40    1.70
  -7   3   1    1.70    2.10
   8  -4  -1  123.29    5.70
   8  -4  -1  132.09    6.60
  -8   4   1  114.69    6.10
  -8   4   1  126.39    6.30
  -8   4   1  120.49    6.90
   9  -5  -1   16.30    1.90
  10  -6  -1  836.52   30.80
  10  -6  -1  831.92   31.50
 -10   6   1  810.12   31.40
 -10   6   1  772.82   34.90
 -10   6   1  816.62   31.40
  11  -7  -1   31.80    3.20
  11  -7  -1   31.50    4.20
 -11   7   1   28.50    4.20
 -11   7   1   25.30    3.20
 -11   7   1   28.30    3.40
  12  -8  -1   -3.20    3.60
  12  -8  -1    0.00    2.70
 -12   8   1   -2.10    2.70
 -12   8   1   -2.20    2.50
 -12   8   1   -1.10    3.30
  13  -9  -1  116.09    7.50
  13  -9  -1  126.69    9.40
 -13   9   1  134.69    8.50
 -13   9   1  116.09    8.30
 -13   9   1  128.59    9.10
  14 -10  -1   28.60    5.50
 -14  10   1   28.90    4.60
 -14  10   1   23.90    5.30
  15 -11  -1  122.89   10.60
 -15  11   1  109.89    9.90
 -15  11   1  127.29    9.60
  16 -12  -1   -7.90    5.40
 -16  12   1    2.20    5.10
 -16  12   1   -9.40    4.60
  17 -13  -1   10.40    6.30
 -17  13   1   -2.30    4.70
 -17  13   1    3.40    5.50
  18 -14  -1    9.40    6.70
 -18  14   1    4.40    5.20
 -18  14   1    0.00    5.70
 -14  16   0    4.60    5.60
  14 -16   0    4.00    6.10
 -13  15   0   28.50    6.00
  13 -15   0   28.90    6.80
 -12  14   0   -3.00    4.30
  12 -14   0    3.60    5.20
 -11  13   0   48.50    6.00
 -11  13   0   52.29    5.90
  11 -13   0   61.59    6.20
 -10  12   0   17.30    3.30
 -10  12   0   19.80    4.80
 -10  12   0   22.10    4.40
  10 -12   0   16.10    4.80
  -9  11   0   16.40    3.50
  -9  11   0   24.30    4.10
  -9  11   0   19.10    4.30
   9 -11   0   24.70    4.60
  -8  10   0    4.60    2.60
  -8  10   0    7.90    2.50
  -8  10   0    9.80    3.80
  -8  10   0    2.10    2.90
   8 -10   0    6.10    3.50
   8 -10   0    8.40    2.90
  -7   9   0   91.19    6.70
  -7   9   0   89.79    5.40
  -7   9   0   89.89    6.00
  -7   9   0   90.99    5.90
   7  -9   0   93.49    6.70
   7  -9   0   93.19    6.10
  -6   8   0  476.05   18.30
  -6   8   0  436.76   18.90
  -6   8   0  468.85   18.40
  -6   8   0  446.26   18.30
   6  -8   0  475.85   18.50
   6  -8   0  457.05   18.30
  -5   7   0    0.50    2.50
  -5   7   0    2.90    1.80
  -5   7   0   -1.70    2.00
  -5   7   0   -2.60    2.00
   5  -7   0    1.30    2.20
   5  -7   0   -4.30    2.30
   5  -7   0   -0.60    0.40
  -4   6   0    2.90    1.90
  -4   6   0    3.80    1.60
  -4   6   0    3.70    1.70
  -4   6   0    5.30    2.10
   4  -6   0   -0.30    1.00
   4  -6   0    2.60    2.00
  -3   5   0  265.97   10.40
  -3   5   0  250.17   10.20
  -3   5   0  238.18   10.20
   3  -5   0  244.18   10.30
   3  -5   0  273.87   10.30
  -2   4   0  635.14   24.20
  -2   4   0  642.64   24.30
  -2   4   0  621.54   24.30
   2  -4   0  689.33   24.20
   2  -4   0  629.24   24.30
  -1   3   0  209.08    8.00
  -1   3   0  212.98    8.10
  -1   3   0  202.28    8.00
   1  -3   0  205.48    8.10
   1  -3   0  190.38    8.10
   0   2   0   24.30    1.40
   0   2   0   23.30    1.40
   0   2   0   21.80    1.50
   0  -2   0   22.30    1.40
   1   1   0    3.20    0.50
  -1  -1   0    3.10    0.40
   2   0   0 6475.55  241.38
   2   0   0 6805.52  269.97
  -2   0   0 6284.47  241.38
  -2   0   0 6480.65  269.77
   3  -1   0  236.38    9.10
   3  -1   0  231.28   10.10
  -3   1   0  237.38   10.10
  -3   1   0  224.48    9.00
  -3   1   0  236.78    9.10
   4  -2   0  232.18    9.40
   4  -2   0  234.98    9.70
  -4   2   0  240.28    9.60
  -4   2   0  240.78   10.60
  -4   2   0  234.78    9.50
   5  -3   0   15.20    2.20
   5  -3   0   14.60    1.90
  -5   3   0   16.80    2.00
  -5   3   0   14.50    1.70
   6  -4   0 1107.09   40.40
   6  -4   0 1098.99   41.00
  -6   4   0 1103.69   40.90
  -6   4   0 1088.89   40.40
  -6   4   0 1040.00   40.90
   7  -5   0 1640.24   61.59
  -7   5   0 1620.44   61.49
  -7   5   0 1729.83   60.89
  -7   5   0 1581.54   61.49
   8  -6   0    7.20    3.00
   8  -6   0    5.80    2.20
   8  -6   0    4.10    2.20
  -8   6   0    6.20    2.30
  -8   6   0    9.60    2.30
   9  -7   0   60.99    4.90
   9  -7   0   72.29    5.20
   9  -7   0   78.49    6.40
  -9   7   0   79.29    5.40
  -9   7   0   79.09    5.70
  10  -8   0   34.00    3.70
  10  -8   0   34.90    4.40
 -10   8   0   38.40    3.90
 -10   8   0   38.80    4.00
  11  -9   0  124.89    7.40
  11  -9   0  126.89    8.80
 -11   9   0  100.79    7.80
 -11   9   0  112.49    7.70
 -11   9   0  115.99    7.60
  12 -10   0   11.90    5.00
 -12  10   0    4.30    4.20
 -12  10   0    5.40    3.60
 -12  10   0    3.00    3.60
  13 -11   0   44.30    5.90
 -13  11   0   38.30    4.50
 -13  11   0   39.50    5.40
 -13  11   0   34.90    5.30
  14 -12   0    5.00    5.30
 -14  12   0   19.50    5.30
 -14  12   0   17.60    5.10
  15 -13   0    9.50    6.00
 -15  13   0   11.50    5.30
 -15  13   0   12.80    5.40
  16 -14   0    2.20    6.50
 -16  14   0   -3.00    5.10
 -16  14   0   -3.90    5.10
 -15  15   1   22.20    5.60
 -15  15   1    8.30    6.10
  15 -15  -1    8.20    6.00
 -14  14   1   23.40    5.40
  14 -14  -1   13.30    5.70
 -13  13   1    7.90    4.80
  13 -13  -1   15.60    5.40
 -12  12   1   -1.80    4.30
 -12  12   1   -4.60    3.90
 -12  12   1   -2.00    3.00
  12 -12  -1   -9.40    4.60
 -11  11   1  155.78    9.30
 -11  11   1  161.48   10.00
 -11  11   1  162.48   10.00
 -11  11   1  160.48    8.90
  11 -11  -1  198.08   10.80
 -10  10   1  125.49    8.20
 -10  10   1  122.79    7.90
 -10  10   1  109.39    7.20
 -10  10   1  121.39    7.40
  10 -10  -1  130.79    8.50
  10 -10  -1  126.09    7.40
  -9   9   1  142.89    8.10
  -9   9   1  136.79    7.50
  -9   9   1  140.69    7.90
   9  -9  -1  141.99    8.30
  -8   8   1   -1.10    2.10
  -8   8   1   -1.30    2.40
  -8   8   1   -2.70    2.70
   8  -8  -1   -4.30    2.70
   8  -8  -1   -4.50    2.10
   8  -8  -1    1.50    2.30
  -7   7   1   12.00    2.40
  -7   7   1   13.10    2.30
  -7   7   1   16.60    2.80
   7  -7  -1   12.80    2.80
   7  -7  -1   12.90    2.40
   7  -7  -1   12.90    2.40
  -6   6   1  617.54   23.40
  -6   6   1  603.44   23.60
  -6   6   1  615.34   23.50
   6  -6  -1  614.74   23.70
   6  -6  -1  615.84   23.60
  -5   5   1  150.98    7.50
  -5   5   1  187.88    7.70
  -5   5   1  189.58    7.60
   5  -5  -1  201.68    7.60
   5  -5  -1  158.48    7.70
  -4   4   1  505.75   18.80
  -4   4   1  478.05   18.70
  -4   4   1  486.65   18.70
   4  -4  -1  491.15   18.80
   4  -4  -1  503.85   18.70
   4  -4  -1  486.65   18.80
  -3   3   1 4399.06  159.98
  -3   3   1 4327.97  161.58
  -3   3   1 4334.27  161.48
   3  -3  -1 4362.76  161.18
   3  -3  -1 4499.45  159.98
   3  -3  -1 4279.47  161.58
  -2   2   1  196.38    7.50
  -2   2   1  189.58    7.50
  -2   2   1  196.28    7.40
   2  -2  -1  195.98    7.50
   2  -2  -1  188.08    7.50
   2  -2  -1  198.58    7.40
   1  -1  -1 1841.32   69.39
   1  -1  -1 1916.51   68.79
   0   0   1    0.20    0.20
   0   0   1   -0.10    0.20
   0   0   1   -0.10    0.10
   0   0  -1   -0.60    0.30
   0   0  -1    0.00    0.30
   0   0  -1    0.10    0.20
   1  -1   1 1007.50   37.50
   1  -1   1 1021.60   37.50
   1  -1   1 1034.10   40.20
  -1   1  -1  992.80   40.10
  -1   1  -1 1003.00   37.50
   2  -2   1   43.10    2.90
   2  -2   1   34.80    2.90
   2  -2   1   47.20    2.90
  -2   2  -1   42.10    2.80
  -2   2  -1   37.70    3.20
  -2   2  -1   40.10    2.80
   3  -3   1  909.71   34.40
   3  -3   1  923.01   34.40
   3  -3   1  951.10   34.10
  -3   3  -1  899.11   36.70
  -3   3  -1  919.61   34.40
  -3   3  -1  902.61   34.40
   4  -4   1    4.20    1.90
  -4   4  -1    6.00    1.80
  -4   4  -1   -0.10    1.90
   5  -5   1   94.59    5.60
   5  -5   1  101.49    5.90
  -5   5  -1  106.69    5.60
  -5   5  -1  108.19    5.40
  -5   5  -1   93.19    5.40
   6  -6   1  324.67   13.80
   6  -6   1  347.67   13.50
   6  -6   1  323.17   13.70
  -6   6  -1  323.67   13.60
  -6   6  -1  332.77   14.30
  -6   6  -1  328.57   13.60
  -6   6  -1  330.87   13.50
   7  -7   1  374.76   14.50
   7  -7   1  337.07   14.60
   7  -7   1  357.66   14.80
  -7   7  -1  351.16   14.60
  -7   7  -1  350.16   15.30
  -7   7  -1  348.77   14.80
   8  -8   1   -3.60    3.10
   8  -8   1   -1.00    2.50
  -8   8  -1   -2.10    2.40
  -8   8  -1   -1.90    2.50
  -8   8  -1    1.50    2.80
   9  -9   1  122.59    7.30
   9  -9   1  122.49    8.40
  -9   9  -1  117.89    7.30
  -9   9  -1  125.09    7.80
  -9   9  -1  116.49    7.30
  10 -10   1  136.89    9.80
 -10  10  -1  123.69    8.60
 -10  10  -1  134.59    8.10
  11 -11   1   75.09    6.60
 -11  11  -1   80.09    7.00
 -11  11  -1   67.49    6.00
  12 -12   1    0.10    5.30
 -12  12  -1   -5.00    3.40
 -12  12  -1   -1.90    4.40
  13 -13   1  -10.90    5.00
 -13  13  -1   -5.90    4.50
 -13  13  -1    7.40    4.70
  14 -14   1   38.80    7.20
 -14  14  -1   30.10    6.20
 -14  14  -1   30.50    6.00
  15 -15   1    2.90    6.30
 -15  15  -1   -0.10    5.60
 -15  15  -1   -0.30    5.40
 -17  15   2    1.00    5.30
 -17  15   2    8.30    6.20
 -16  14   2   -4.10    5.00
 -16  14   2   -1.60    5.10
  16 -14  -2   -1.30    5.60
 -15  13   2   -3.50    4.40
 -15  13   2    3.50    5.40
  15 -13  -2   -2.70    5.20
 -14  12   2  122.69    9.40
 -14  12   2  144.49   10.00
 -14  12   2  130.39   10.90
  14 -12  -2  165.18   10.80
 -13  11   2   -1.00    3.20
 -13  11   2   -5.60    3.90
 -13  11   2   -1.50    3.50
  13 -11  -2   -1.30    4.60
 -12  10   2    6.60    3.80
 -12  10   2   14.80    3.60
 -12  10   2   10.60    3.40
  12 -10  -2   15.40    3.30
  12 -10  -2   16.40    4.60
 -11   9   2   12.10    3.70
 -11   9   2   17.60    3.20
 -11   9   2   21.00    3.40
  11  -9  -2   20.30    4.00
  11  -9  -2   18.50    3.20
 -10   8   2  274.97   12.00
 -10   8   2  283.67   12.20
 -10   8   2  272.87   12.10
  10  -8  -2  285.07   12.50
  10  -8  -2  270.27   11.80
  -9   7   2   70.19    5.00
  -9   7   2   64.09    5.20
  -9   7   2   67.59    5.30
   9  -7  -2   75.39    5.80
   9  -7  -2   72.79    5.00
   9  -7  -2   70.49    4.80
  -8   6   2  123.69    6.50
  -8   6   2  143.49    6.50
  -8   6   2  135.39    6.40
   8  -6  -2  106.49    6.30
   8  -6  -2  130.29    7.00
  -7   5   2  209.38    8.60
  -7   5   2  189.48    8.50
  -7   5   2  189.58    8.60
   7  -5  -2  190.38    8.40
   7  -5  -2  225.08    8.90
   7  -5  -2  214.28    8.70
  -6   4   2    4.00    1.60
  -6   4   2    7.10    1.60
  -6   4   2    5.40    1.70
   6  -4  -2    3.60    1.50
   6  -4  -2    4.60    1.60
   6  -4  -2    5.20    1.80
  -5   3   2  445.06   16.50
  -5   3   2  439.06   16.30
  -5   3   2  420.36   16.50
   5  -3  -2  413.96   16.30
   5  -3  -2  432.66   16.50
   5  -3  -2  442.66   16.50
  -4   2   2  341.27   13.10
  -4   2   2  339.97   13.00
   4  -2  -2  347.77   13.00
  -3   1   2 1521.85   56.99
  -3   1   2 1583.04   56.49
  -3   1   2 1579.34   63.99
   3  -1  -2 1548.05   56.99
   3  -1  -2 1428.56   56.99
   3  -1  -2 1594.84   56.49
  -2   0   2    0.90    1.50
   2   0  -2    5.00    1.40
  -1  -1   2 1058.69   38.60
  -1  -1   2 1034.10   38.60
  -1  -1   2 1083.09   41.40
   1   1  -2 1021.50   38.60
   1   1  -2 1017.00   38.60
   0  -2   2  141.49    5.80
   0  -2   2  139.89    6.30
   0  -2   2  140.79    5.90
   0   2  -2  145.79    6.20
   0   2  -2  142.99    5.90
   1  -3   2  129.19    6.10
   1  -3   2  131.79    6.40
   1  -3   2  131.59    6.00
   1  -3   2  137.59    5.80
  -1   3  -2  128.19    5.80
  -1   3  -2  133.69    5.80
  -1   3  -2  128.09    6.10
   2  -4   2  166.58    7.50
   2  -4   2  187.78    7.60
   2  -4   2  179.78    7.50
   2  -4   2  160.88    7.80
  -2   4  -2  171.28    7.70
  -2   4  -2  165.88    7.40
  -2   4  -2  173.48    7.40
   3  -5   2  140.89    6.90
   3  -5   2  145.79    6.80
  -3   5  -2  143.49    6.70
  -3   5  -2  140.89    6.70
  -3   5  -2  146.19    7.00
  -3   5  -2  152.08    6.90
   4  -6   2   40.60    3.70
   4  -6   2   57.79    4.40
   4  -6   2   40.70    3.40
  -4   6  -2   44.60    3.60
  -4   6  -2   49.10    4.10
  -4   6  -2   39.00    3.10
  -4   6  -2   34.50    3.20
   5  -7   2   27.40    3.60
   5  -7   2   22.70    3.30
   5  -7   2   30.40    3.10
  -5   7  -2   34.20    3.10
  -5   7  -2   31.40    3.30
  -5   7  -2   28.20    3.00
   6  -8   2  342.37   14.00
   6  -8   2  338.87   14.30
   6  -8   2  330.57   14.10
  -6   8  -2  321.37   13.90
  -6   8  -2  339.87   14.50
  -6   8  -2  322.47   14.10
   7  -9   2   -1.40    3.60
   7  -9   2    2.50    2.80
  -7   9  -2   -2.10    2.50
  -7   9  -2   -4.00    2.40
  -7   9  -2    0.20    3.00
   8 -10   2   89.49    6.70
  -8  10  -2   82.59    6.30
  -8  10  -2   86.69    6.40
   9 -11   2   10.10    4.70
  -9  11  -2    9.40    4.30
  -9  11  -2    4.10    3.10
  10 -12   2  161.38   11.00
 -10  12  -2  163.08   10.40
 -10  12  -2  148.19    9.20
  11 -13   2    5.30    5.50
 -11  13  -2    4.70    4.70
  12 -14   2   -1.10    5.60
 -12  14  -2    8.50    5.10
  13 -15   2   -2.80    5.90
 -13  15  -2    3.10    5.10
 -13  15  -2    5.50    5.30
 -18  14   3   46.90    6.40
 -18  14   3   41.40    7.40
 -17  13   3   -1.00    5.60
 -17  13   3    8.10    4.90
  17 -13  -3   -1.50    5.50
 -16  12   3    4.80    5.30
 -16  12   3   -1.40    4.40
  16 -12  -3    6.60    5.30
 -15  11   3    6.90    4.20
 -15  11   3   22.00    4.50
 -15  11   3   18.20    5.40
  15 -11  -3   11.10    4.80
 -14  10   3   88.99    9.00
 -14  10   3   90.09    7.20
 -14  10   3   95.29    7.60
 -14  10   3   71.19    5.80
  14 -10  -3   69.19    6.30
  14 -10  -3   71.89    6.20
 -13   9   3   20.30    3.80
 -13   9   3   22.10    3.60
 -13   9   3   19.00    4.80
 -13   9   3   22.50    3.90
  13  -9  -3   16.80    3.10
  13  -9  -3   22.30    4.30
 -12   8   3   -3.40    3.00
 -12   8   3   -3.60    2.60
 -12   8   3    4.10    3.80
 -12   8   3    0.60    2.60
  12  -8  -3   -2.20    2.30
  12  -8  -3    0.10    3.30
 -11   7   3  281.07   12.30
 -11   7   3  305.17   12.50
 -11   7   3  302.47   12.60
  11  -7  -3  270.77   12.30
  11  -7  -3  307.77   12.80
  11  -7  -3  282.97   12.00
  10  -6  -3    0.70    0.90
  -9   5   3   56.49    4.20
  -9   5   3   53.29    4.10
  -9   5   3   58.19    4.20
   9  -5  -3   54.79    4.70
   9  -5  -3   46.50    3.60
   9  -5  -3   56.79    4.40
  -8   4   3   38.30    3.30
  -8   4   3   49.10    3.60
  -8   4   3   42.40    3.30
  -8   4   3   39.80    3.70
   8  -4  -3   46.60    3.90
   8  -4  -3   37.40    3.10
  -7   3   3  394.06   17.00
  -7   3   3  394.56   14.90
  -7   3   3  352.56   14.80
  -7   3   3  387.46   14.60
   7  -3  -3  390.96   14.60
   7  -3  -3  389.36   14.80
   7  -3  -3  384.76   14.90
  -6   2   3  165.48    6.60
  -6   2   3  179.98    7.90
   6  -2  -3  133.69    6.50
   6  -2  -3  158.98    6.70
  -5   1   3  261.37   11.70
  -5   1   3  267.77   10.10
   5  -1  -3  248.68   11.70
  -4   0   3   -0.30    0.90
  -4   0   3   -1.90    1.60
  -4   0   3   -0.90    0.90
   4   0  -3   -1.70    1.00
   4   0  -3    0.50    0.90
   4   0  -3    3.00    1.70
  -3  -1   3 1883.31   68.49
  -3  -1   3 1884.91   68.49
  -3  -1   3 1775.02   76.79
   3   1  -3 1903.51   68.49
   3   1  -3 1890.31   68.49
   3   1  -3 1781.62   76.79
  -2  -2   3 3282.77  120.79
  -2  -2   3 3168.48  120.99
   2   2  -3 3362.66  120.89
   2   2  -3 3250.17  120.99
  -1  -3   3 3172.88  116.99
  -1  -3   3 3150.68  125.19
  -1  -3   3 3192.78  116.99
   1   3  -3 3142.69  116.99
   0  -4   3  319.07   12.80
   0  -4   3  312.37   13.50
   0  -4   3  330.77   12.70
   0   4  -3  332.87   12.70
   0   4  -3  320.97   13.40
   0   4  -3  325.27   12.80
   1  -5   3  401.86   17.30
   1  -5   3  421.26   16.20
   1  -5   3  406.86   16.30
  -1   5  -3  426.16   17.10
  -1   5  -3  425.86   16.30
  -1   5  -3  410.46   16.20
   2  -6   3  279.67   11.30
   2  -6   3  265.07   11.50
   2  -6   3  271.57   12.10
   2  -6   3  277.07   11.50
  -2   6  -3  281.87   11.80
  -2   6  -3  272.87   11.30
  -2   6  -3  269.57   11.40
   3  -7   3    3.00    2.50
   3  -7   3    3.10    2.50
   3  -7   3    3.80    2.10
  -3   7  -3    2.40    2.00
  -3   7  -3    0.10    2.00
  -3   7  -3    3.80    2.20
   4  -8   3   13.90    3.10
   4  -8   3   10.10    2.20
   4  -8   3   12.40    2.80
  -4   8  -3   16.50    2.70
  -4   8  -3   15.80    3.10
  -4   8  -3   10.60    2.60
   5  -9   3    4.50    2.90
   5  -9   3    5.60    3.50
  -5   9  -3    2.40    2.90
  -5   9  -3    1.80    2.60
  -5   9  -3    4.70    2.40
   6 -10   3  219.78   11.50
  -6  10  -3  214.18   11.20
  -6  10  -3  232.98   10.70
   7 -11   3  200.98   11.50
  -7  11  -3  188.08   10.80
  -7  11  -3  202.68   10.10
   8 -12   3   14.90    4.90
  -8  12  -3   13.10    3.40
  -8  12  -3    7.60    4.50
   9 -13   3   -6.30    4.80
  -9  13  -3    1.10    4.30
  10 -14   3    2.30    5.10
 -10  14  -3   11.50    5.00
  11 -15   3    7.90    6.50
 -11  15  -3    8.50    5.50
  12 -16   3   -8.00    6.20
 -12  16  -3    1.10    5.80
 -19  13   4   20.50    6.70
 -19  13   4   30.50    5.90
 -18  12   4   14.40    5.00
 -18  12   4   10.20    6.10
  18 -12  -4    8.40    5.30
 -17  11   4   22.20    6.10
 -17  11   4   33.20    5.20
  17 -11  -4   32.30    5.50
 -16  10   4   -4.30    3.40
 -16  10   4   -6.40    4.80
 -16  10   4   -3.30    3.70
 -16  10   4   -5.30    3.60
  16 -10  -4   -6.10    4.30
  16 -10  -4   -3.70    3.10
 -15   9   4  109.69    7.60
 -15   9   4  108.29    7.80
 -15   9   4  124.09    8.00
 -15   9   4  116.39    9.90
  15  -9  -4  123.89    8.90
  15  -9  -4  113.69    7.20
 -14   8   4    3.70    4.40
 -14   8   4    8.10    3.10
 -14   8   4    4.40    2.90
 -14   8   4    3.70    3.20
  14  -8  -4    3.20    2.60
  14  -8  -4    1.90    3.60
 -13   7   4  271.37   11.50
 -13   7   4  241.68   11.10
 -13   7   4  256.47   11.40
 -13   7   4  249.08   13.40
  13  -7  -4  243.78   10.80
  13  -7  -4  268.97   11.80
 -12   6   4    1.10    2.20
 -12   6   4    1.40    3.30
 -12   6   4   -0.80    2.40
 -12   6   4    1.80    2.30
  12  -6  -4    0.60    1.00
  12  -6  -4    2.90    2.90
  12  -6  -4   -1.90    2.40
 -11   5   4  375.16   18.30
 -11   5   4  410.06   16.00
 -11   5   4  395.06   15.90
 -11   5   4  397.76   15.50
  11  -5  -4  414.56   16.20
  11  -5  -4  393.46   15.50
  11  -5  -4  404.76   16.00
 -10   4   4   69.69    6.00
 -10   4   4   82.69    4.70
 -10   4   4   73.19    4.10
  10  -4  -4   63.79    5.00
  10  -4  -4   65.49    3.90
  10  -4  -4   68.59    4.50
  -9   3   4   29.30    3.50
  -9   3   4   26.80    2.40
   9  -3  -4   27.30    2.50
  -8   2   4    2.20    1.60
  -8   2   4    1.20    2.40
   8  -2  -4   -0.90    1.30
   8  -2  -4    0.70    1.70
  -7   1   4    1.30    2.20
   7  -1  -4    4.20    1.70
  -6   0   4  177.48    7.10
  -6   0   4  170.28    8.60
  -6   0   4  178.58    7.20
   6   0  -4  176.18    7.10
   6   0  -4  180.18    8.60
   6   0  -4  169.78    7.20
  -5  -1   4   39.40    4.00
  -5  -1   4   38.00    2.70
  -5  -1   4   45.60    2.80
   5   1  -4   43.00    2.80
   5   1  -4   40.50    2.70
   5   1  -4   42.30    3.30
  -4  -2   4 4577.64  168.98
  -4  -2   4 4714.53  168.98
   4   2  -4 4542.95  168.78
   4   2  -4 4396.46  188.78
   4   2  -4 4613.24  169.08
  -3  -3   4  521.75   20.10
  -3  -3   4  527.55   20.10
  -3  -3   4  524.85   20.10
   3   3  -4  533.25   20.00
   3   3  -4  535.25   20.10
  -2  -4   4  756.52   29.30
  -2  -4   4  792.82   29.30
  -2  -4   4  782.32   29.30
  -2  -4   4  782.02   31.40
   2   4  -4  774.62   29.30
  -1  -5   4  325.27   12.80
  -1  -5   4  315.27   13.60
  -1  -5   4  318.97   12.90
   1   5  -4  330.37   12.70
   1   5  -4  318.57   12.80
   0  -6   4   39.90    3.30
   0  -6   4   37.70    2.90
   0  -6   4   34.50    3.10
   0   6  -4   39.30    2.90
   0   6  -4   44.30    3.30
   1  -7   4  310.87   12.80
   1  -7   4  321.47   13.10
   1  -7   4  304.67   13.00
   1  -7   4  310.07   13.60
  -1   7  -4  303.57   13.20
  -1   7  -4  309.57   12.90
  -1   7  -4  306.67   12.70
   2  -8   4  498.95   21.60
   2  -8   4  566.94   20.60
   2  -8   4  491.15   20.40
   2  -8   4  503.45   20.30
  -2   8  -4  496.35   20.20
  -2   8  -4  520.75   21.20
  -2   8  -4  504.75   20.40
   3  -9   4  112.49    7.00
   3  -9   4   94.49    6.40
   3  -9   4  110.29    7.40
  -3   9  -4  105.99    6.90
  -3   9  -4  107.49    6.30
  -3   9  -4  117.69    6.20
   4 -10   4   13.40    3.80
  -4  10  -4   16.40    2.70
  -4  10  -4   15.70    3.60
   5 -11   4    9.90    4.40
  -5  11  -4    6.60    3.90
  -5  11  -4    8.90    2.90
   6 -12   4    4.30    4.60
  -6  12  -4   -2.20    3.90
  -6  12  -4   -7.30    2.80
   7 -13   4  117.79   10.20
  -7  13  -4  113.49    9.40
  -7  13  -4  109.59    7.50
   8 -14   4   -6.20    5.30
  -8  14  -4   -3.10    4.50
   9 -15   4   11.70    6.20
  -9  15  -4    0.00    5.00
  10 -16   4   -0.80    5.70
 -10  16  -4    6.40    5.60
 -21  13   5   11.60    7.00
 -20  12   5  -10.50    5.80
 -19  11   5    3.10    6.10
  19 -11  -5    9.30    5.10
 -18  10   5   25.70    6.20
  18 -10  -5   22.60    5.10
 -17   9   5   -1.70    3.40
 -17   9   5   -1.20    5.10
 -17   9   5    1.50    3.30
  17  -9  -5   -1.10    4.30
  17  -9  -5   -1.80    2.70
 -16   8   5    9.50    3.30
 -16   8   5    6.30    3.20
 -16   8   5   12.10    5.10
  16  -8  -5   10.10    4.10
  16  -8  -5    3.40    2.60
 -15   7   5   87.39    8.40
 -15   7   5   76.69    6.50
 -15   7   5   69.79    5.80
  15  -7  -5   87.99    7.20
  15  -7  -5   74.89    5.30
 -14   6   5  434.86   17.30
 -14   6   5  391.36   20.00
  14  -6  -5  441.26   17.60
 -13   5   5   71.59    5.50
 -13   5   5   71.69    6.20
  13  -5  -5   69.59    5.10
  13  -5  -5   69.99    5.90
 -12   4   5   -1.90    2.20
 -12   4   5    2.50    3.40
  12  -4  -5    2.10    2.50
  12  -4  -5    0.90    2.00
 -11   3   5   88.59    5.10
 -11   3   5  101.89    6.70
  11  -3  -5   83.49    5.40
  11  -3  -5   59.19    4.70
  10  -2  -5  231.68    9.40
  -9   1   5   36.90    3.30
  -9   1   5   33.20    2.50
  -9   1   5   41.40    3.60
   9  -1  -5   34.90    3.20
  -8   0   5   -1.30    1.50
  -8   0   5   -0.60    1.40
  -8   0   5   -1.30    2.40
   8   0  -5    0.10    1.40
   8   0  -5    0.20    1.40
   8   0  -5   -2.00    1.40
  -7  -1   5   75.49    5.40
  -7  -1   5   77.29    4.00
  -7  -1   5   78.79    4.00
   7   1  -5   74.69    4.00
   7   1  -5   79.29    3.90
   7   1  -5   79.89    5.20
  -6  -2   5  736.23   28.50
  -6  -2   5  796.82   28.50
   6   2  -5  770.62   28.50
   6   2  -5  769.92   28.50
   6   2  -5  724.83   32.20
  -5  -3   5  301.97   11.80
  -5  -3   5  289.97   11.90
  -5  -3   5  309.67   11.70
   5   3  -5  292.37   11.70
  -4  -4   5   74.09    4.10
  -4  -4   5   74.39    4.70
  -4  -4   5   77.99    4.30
   4   4  -5   72.09    4.10
  -3  -5   5   70.99    4.90
  -3  -5   5   79.49    5.00
  -3  -5   5   80.59    4.40
  -3  -5   5   73.79    4.60
   3   5  -5   75.29    4.50
  -2  -6   5   13.50    2.40
  -2  -6   5   12.50    2.10
  -2  -6   5   11.60    2.50
  -2  -6   5   14.20    2.60
   2   6  -5   17.80    2.20
   2   6  -5   17.20    2.40
  -1  -7   5  190.18    8.80
  -1  -7   5  183.98    9.10
  -1  -7   5  191.78    8.50
   1   7  -5  182.48    8.40
   1   7  -5  185.98    8.50
   0  -8   5   87.49    5.40
   0  -8   5   84.89    5.70
   0  -8   5   73.79    6.10
   0  -8   5   81.29    6.10
   0   8  -5   84.49    5.30
   0   8  -5   88.69    6.00
   1  -9   5   95.19    6.80
   1  -9   5   94.29    6.10
   1  -9   5  100.29    7.00
  -1   9  -5  103.69    6.00
  -1   9  -5   95.89    6.50
   2 -10   5   -0.20    3.20
  -2  10  -5    0.20    3.20
   3 -11   5   73.89    6.40
  -3  11  -5   68.99    5.90
   4 -12   5   37.50    5.60
  -4  12  -5   36.70    4.90
   5 -13   5   17.10    4.80
  -5  13  -5   16.20    4.80
   6 -14   5   81.89    7.60
  -6  14  -5   68.49    7.10
   7 -15   5   21.90    6.60
  -7  15  -5   13.00    5.50
   8 -16   5  -15.90    6.00
  -8  16  -5   -0.40    5.20
 -22  12   6   12.20    7.30
 -21  11   6   -5.80    6.50
 -20  10   6   -2.70    5.90
  20 -10  -6   -1.00    4.90
 -19   9   6    5.30    5.60
  19  -9  -6   -1.00    4.60
 -18   8   6   85.39    8.30
 -18   8   6   94.49    7.60
  18  -8  -6   82.49    6.60
 -17   7   6   -5.00    3.10
 -17   7   6   -3.20    4.60
  17  -7  -6   -0.20    3.90
 -16   6   6    0.90    3.10
 -16   6   6   -3.90    4.20
  16  -6  -6   -1.10    3.50
 -15   5   6  139.09   10.00
 -15   5   6  149.39    7.80
  15  -5  -6  142.79    8.40
 -14   4   6  990.20   41.50
 -14   4   6  978.40   36.50
  14  -4  -6  974.40   36.50
  14  -4  -6  880.51   36.30
 -13   3   6  373.56   18.00
 -13   3   6  369.66   15.50
  13  -3  -6  390.96   15.50
  13  -3  -6  407.26   15.70
 -12   2   6   12.70    3.40
 -12   2   6   13.40    2.40
 -12   2   6   11.70    2.30
  12  -2  -6    9.80    2.00
  12  -2  -6   12.90    2.40
 -11   1   6   10.10    2.20
 -11   1   6   12.00    2.30
 -11   1   6    9.90    3.00
  11  -1  -6   12.10    3.00
  11  -1  -6    6.40    2.10
 -10   0   6  252.97    9.90
 -10   0   6  245.88   11.90
 -10   0   6  234.08    9.80
  10   0  -6  240.78    9.80
  10   0  -6  219.88   11.60
  -9  -1   6  113.99    5.20
  -9  -1   6  111.79    5.20
  -9  -1   6  111.19    6.80
   9   1  -6  113.39    5.20
   9   1  -6   82.39    6.20
  -8  -2   6    4.40    1.80
  -8  -2   6    4.40    1.70
   8   2  -6   -0.30    0.80
   8   2  -6    4.00    1.50
   8   2  -6    0.20    1.40
  -7  -3   6  855.71   32.30
  -7  -3   6  846.22   32.10
  -7  -3   6  893.31   32.30
   7   3  -6  872.61   32.20
   7   3  -6  819.52   36.40
  -5  -5   6  177.18    7.60
  -5  -5   6  161.58    7.70
  -5  -5   6  174.78    7.90
   5   5  -6  170.08    7.40
   5   5  -6  163.88    7.60
  -4  -6   6  342.97   14.90
  -4  -6   6  331.57   14.00
  -4  -6   6  326.97   13.90
  -4  -6   6  361.06   13.80
   4   6  -6  341.97   13.90
  -3  -7   6  212.58    9.40
  -3  -7   6  198.28    9.50
  -3  -7   6  190.88    9.10
  -3  -7   6  192.58    8.90
   3   7  -6  194.58    9.00
   3   7  -6  192.98    8.70
  -2  -8   6  114.39    6.90
  -2  -8   6  113.39    6.30
  -2  -8   6  104.69    6.80
  -2  -8   6  119.49    6.90
   2   8  -6  115.69    6.40
   2   8  -6  106.89    6.10
  -1  -9   6   64.99    5.10
  -1  -9   6   67.69    6.00
  -1  -9   6   66.99    5.10
   1   9  -6   74.49    6.10
   0 -10   6   -6.50    3.40
   0 -10   6    0.30    3.20
   0  10  -6   -5.00    3.00
   1 -11   6   28.00    4.40
   1 -11   6   27.00    4.40
  -1  11  -6   26.70    4.30
   2 -12   6   40.10    5.80
  -2  12  -6   38.00    4.80
   3 -13   6   23.20    5.60
  -3  13  -6   23.40    4.80
   4 -14   6    7.40    5.00
  -4  14  -6   -4.80    4.20
   5 -15   6    1.90    5.00
  -5  15  -6   -3.70    5.10
   6 -16   6   49.20    6.90
  -6  16  -6   45.00    6.90
 -23  11   7    5.30    7.10
 -22  10   7    5.50    7.00
 -21   9   7   -2.20    6.30
  21  -9  -7   -3.50    4.90
 -20   8   7   16.30    6.30
  20  -8  -7   26.20    5.20
 -19   7   7   53.09    7.00
 -19   7   7   48.40    5.00
  19  -7  -7   50.99    5.60
 -18   6   7   92.99    8.20
 -18   6   7   91.69    7.60
  18  -6  -7   83.79    6.40
 -17   5   7   73.19    7.20
 -17   5   7   68.49    5.30
  17  -5  -7   84.89    7.10
 -16   4   7    9.80    3.00
 -16   4   7    8.90    4.20
  16  -4  -7   15.80    3.60
 -15   3   7  470.55   22.20
 -15   3   7  480.05   19.20
 -15   3   7  491.35   19.20
  15  -3  -7  528.75   19.20
  15  -3  -7  423.96   18.90
 -14   2   7   31.20    3.20
 -14   2   7   32.80    4.60
 -14   2   7   32.80    3.20
  14  -2  -7   23.90    2.70
  14  -2  -7   27.80    3.10
 -13   1   7  617.74   24.50
 -13   1   7  654.93   24.60
 -13   1   7  640.54   28.20
  13  -1  -7  658.03   24.50
  13  -1  -7  608.54   28.10
 -12   0   7   -0.30    2.00
 -12   0   7   -3.60    2.10
 -12   0   7    1.10    3.00
  12   0  -7    0.60    2.00
  12   0  -7   -2.60    2.80
 -11  -1   7   69.79    6.40
 -11  -1   7   74.79    4.70
 -11  -1   7   87.09    4.90
  11   1  -7   87.19    4.60
  11   1  -7   65.49    6.10
  11   1  -7   67.99    4.60
 -10  -2   7  117.49    5.70
 -10  -2   7  114.09    5.80
 -10  -2   7  107.19    5.40
  10   2  -7  124.29    5.80
  10   2  -7  119.09    5.60
  10   2  -7  100.99    7.10
  -9  -3   7   44.20    3.80
  -9  -3   7   46.00    3.90
  -9  -3   7   49.20    3.90
   9   3  -7   45.50    4.30
   9   3  -7   52.29    3.70
   9   3  -7   49.90    3.70
  -8  -4   7   45.70    4.00
  -8  -4   7   44.50    4.00
  -8  -4   7   45.70    3.80
   8   4  -7   42.20    3.70
   8   4  -7   43.70    3.80
   8   4  -7   50.99    4.30
  -7  -5   7  227.48   10.10
  -7  -5   7  236.18   10.10
  -7  -5   7  243.18   10.00
   7   5  -7  232.68    9.90
   7   5  -7  237.98   10.00
  -6  -6   7  501.55   19.00
  -6  -6   7  465.85   19.00
  -6  -6   7  471.95   19.10
   6   6  -7  494.75   19.00
   6   6  -7  477.25   18.80
  -5  -7   7    0.70    2.10
  -5  -7   7    2.60    2.50
  -5  -7   7    1.10    3.00
  -5  -7   7   -1.60    2.50
   5   7  -7    0.70    0.70
   5   7  -7    0.90    2.40
  -4  -8   7   16.50    3.30
  -4  -8   7   18.40    2.90
  -4  -8   7   20.60    3.30
  -4  -8   7   14.20    3.10
   4   8  -7   15.60    3.00
   4   8  -7   14.60    2.50
  -3  -9   7    7.70    3.10
  -3  -9   7   10.40    3.10
  -3  -9   7    6.60    3.30
   3   9  -7    8.30    2.70
  -2 -10   7  332.07   15.80
  -2 -10   7  354.36   15.00
  -2 -10   7  342.47   15.40
   2  10  -7  371.86   15.40
  -1 -11   7   -0.80    3.80
  -1 -11   7   -1.90    3.70
   1  11  -7   -2.10    3.60
   0 -12   7    5.60    4.20
   0 -12   7    5.30    4.10
   0  12  -7    4.40    4.00
   1 -13   7   22.80    5.60
  -1  13  -7   22.20    5.10
   2 -14   7   86.89    7.60
  -2  14  -7   82.39    7.20
   3 -15   7   60.79    7.60
  -3  15  -7   54.99    6.70
   4 -16   7    4.20    5.50
  -4  16  -7    2.00    4.90
   5 -17   7    1.30    6.50
  -5  17  -7   11.10    5.80
 -24  10   8    2.00    7.10
 -23   9   8   20.70    7.40
 -22   8   8   -4.90    6.60
 -21   7   8   -1.20    6.10
  21  -7  -8   10.40    4.60
 -20   6   8   -5.30    5.40
 -20   6   8   -2.00    3.80
  20  -6  -8   -0.90    4.10
 -19   5   8  180.68   12.60
 -19   5   8  189.38    9.90
  19  -5  -8  167.28   10.10
 -18   4   8   31.50    5.60
 -18   4   8   32.90    4.10
 -18   4   8   31.60    4.00
  18  -4  -8   38.70    4.10
 -17   3   8  164.08   11.90
 -17   3   8  178.28    9.20
 -17   3   8  195.98    9.30
  17  -3  -8  189.28    9.30
 -16   2   8   38.60    5.70
 -16   2   8   27.30    3.60
 -16   2   8   38.40    3.70
  16  -2  -8   41.60    3.60
  16  -2  -8   27.80    3.00
 -15   1   8   52.79    5.90
 -15   1   8   53.79    5.00
 -15   1   8   60.19    5.00
  15  -1  -8   78.69    5.30
  15  -1  -8   53.39    5.50
 -14   0   8  503.15   20.10
 -14   0   8  540.75   20.30
 -14   0   8  505.85   23.40
  14   0  -8  532.05   20.10
  14   0  -8  484.25   23.20
 -13  -1   8   12.60    2.50
 -13  -1   8   12.60    3.80
 -13  -1   8   11.80    2.50
  13   1  -8    9.50    2.40
  13   1  -8   10.50    2.30
  13   1  -8   12.90    3.40
 -12  -2   8   -5.40    2.10
 -12  -2   8   -2.30    2.10
  12   2  -8   -2.80    2.00
  12   2  -8   -3.70    2.00
  12   2  -8    1.90    3.10
 -11  -3   8   24.00    2.50
 -11  -3   8   26.50    2.80
 -11  -3   8   16.80    2.80
  11   3  -8   25.40    3.80
  11   3  -8   24.60    2.50
  11   3  -8   17.80    2.40
 -10  -4   8  211.18    9.10
 -10  -4   8  209.98    9.20
 -10  -4   8  206.08    9.40
  10   4  -8  211.68   11.10
  10   4  -8  212.68    9.10
  10   4  -8  210.38    9.10
  -9  -5   8  109.49    5.70
  -9  -5   8  100.49    5.90
  -9  -5   8  105.09    5.80
   9   5  -8  100.99    5.60
   9   5  -8  102.19    5.50
   9   5  -8   79.19    6.90
  -8  -6   8   73.69    5.10
  -8  -6   8   60.89    5.20
  -8  -6   8   70.09    5.00
   8   6  -8   67.69    4.90
   8   6  -8   65.29    4.70
  -7  -7   8   23.10    3.20
  -7  -7   8   17.40    3.00
  -7  -7   8   19.90    2.90
   7   7  -8   17.40    2.60
   7   7  -8   15.80    2.80
  -6  -8   8   74.39    5.50
  -6  -8   8   63.79    5.40
  -6  -8   8   80.89    5.90
  -6  -8   8   68.49    5.00
   6   8  -8   64.69    5.80
  -5  -9   8  120.59    6.80
  -5  -9   8  113.89    7.80
  -5  -9   8  109.39    7.50
   5   9  -8  114.69    7.30
  -4 -10   8    8.50    2.90
  -4 -10   8    8.20    3.70
  -4 -10   8   15.10    3.80
   4  10  -8    8.40    3.10
  -3 -11   8   98.69    8.40
  -3 -11   8  108.69    7.80
   3  11  -8   98.49    8.10
  -2 -12   8   17.80    4.50
  -2 -12   8   13.20    4.30
   2  12  -8   11.50    4.10
  -1 -13   8    8.70    4.50
  -1 -13   8   17.10    4.60
   1  13  -8    9.20    4.70
   0 -14   8   -0.90    5.20
   0 -14   8    3.70    4.70
   0  14  -8  -10.40    4.50
   1 -15   8   43.50    7.10
  -1  15  -8   47.00    6.40
   2 -16   8   -2.30    5.90
  -2  16  -8   -0.40    5.00
   3 -17   8   14.50    6.10
  -3  17  -8   29.20    6.40
 -25   9   9    9.60    7.60
 -24   8   9  -12.30    6.90
 -23   7   9    4.90    7.00
 -23   7   9    3.50    4.70
 -22   6   9   14.10    6.50
 -22   6   9    4.60    4.40
  22  -6  -9    5.70    4.30
 -21   5   9    7.20    3.90
 -21   5   9    8.80    6.30
 -21   5   9   10.00    4.10
  21  -5  -9    7.30    3.90
 -20   4   9    5.10    3.70
 -20   4   9    8.00    3.60
 -20   4   9    4.50    5.80
  20  -4  -9    8.70    3.60
 -19   3   9    1.20    5.50
 -19   3   9    5.70    3.50
 -19   3   9    3.00    3.50
  19  -3  -9    7.80    3.40
 -18   2   9   81.69    6.80
 -18   2   9   94.69    6.60
 -18   2   9   90.99    8.10
  18  -2  -9   86.19    6.60
 -17   1   9   -0.50    2.90
 -17   1   9    4.60    3.00
 -17   1   9    0.90    4.20
  17  -1  -9    3.80    2.80
 -16   0   9    7.20    2.70
 -16   0   9    6.00    4.30
 -16   0   9    2.30    2.70
  16   0  -9    4.30    2.50
 -15  -1   9   28.70    3.30
 -15  -1   9   24.20    4.90
 -15  -1   9   26.20    3.30
  15   1  -9   30.10    4.70
  15   1  -9   30.60    3.10
 -14  -2   9  322.87   13.10
 -14  -2   9  316.67   13.10
  14   2  -9  300.37   15.40
  14   2  -9  325.27   13.00
  14   2  -9  300.87   13.00
 -13  -3   9   71.79    4.50
 -13  -3   9   82.19    5.10
 -13  -3   9   73.09    5.60
  13   3  -9   75.29    4.90
  13   3  -9   74.59    6.70
  13   3  -9   77.89    5.20
 -12  -4   9    8.80    2.20
 -12  -4   9   11.60    2.60
 -12  -4   9   12.10    2.80
  12   4  -9   10.40    2.40
  12   4  -9   17.70    3.70
  12   4  -9   13.00    2.30
 -11  -5   9   10.60    2.40
 -11  -5   9    8.20    2.70
 -11  -5   9    6.60    2.80
  11   5  -9    3.70    2.20
  11   5  -9   10.00    2.40
  11   5  -9   16.00    3.60
 -10  -6   9   95.89    6.00
 -10  -6   9   89.39    6.30
 -10  -6   9  105.19    6.00
  10   6  -9   98.99    7.20
  10   6  -9   85.39    5.60
  10   6  -9  103.89    5.90
  -9  -7   9  100.29    6.50
  -9  -7   9   88.49    6.60
  -9  -7   9  101.69    6.20
   9   7  -9  105.29    6.30
  -8  -8   9    2.40    2.70
  -8  -8   9    6.70    3.10
  -8  -8   9    4.40    3.30
   8   8  -9    3.60    2.70
  -7  -9   9    5.90    3.50
  -7  -9   9    3.90    3.80
  -7  -9   9    5.40    3.00
   7   9  -9    3.30    3.10
  -6 -10   9   11.90    3.30
  -6 -10   9   12.10    4.00
  -6 -10   9    2.80    3.70
   6  10  -9    9.40    3.50
  -5 -11   9   60.09    5.70
  -5 -11   9   64.69    5.70
   5  11  -9   61.79    5.60
  -4 -12   9    5.00    4.30
  -4 -12   9    7.40    4.10
   4  12  -9    3.60    4.10
  -3 -13   9    4.10    4.40
  -3 -13   9   13.80    4.60
   3  13  -9    7.10    4.30
  -2 -14   9    4.80    5.20
  -2 -14   9    1.80    4.70
   2  14  -9    3.40    4.80
  -1 -15   9   19.70    5.50
  -1 -15   9   20.90    5.70
   1  15  -9   15.50    5.50
   0 -16   9    1.70    5.50
   0  16  -9    3.40    5.10
   1 -17   9    2.90    5.90
  -1  17  -9   -3.80    5.40
 -26   8  10   14.20    5.40
 -26   8  10    7.80    8.20
 -25   7  10   18.30    8.00
 -25   7  10   14.40    5.20
 -24   6  10    2.20    4.50
 -24   6  10    0.10    7.50
 -23   5  10    7.80    4.50
 -23   5  10   -4.30    6.90
 -22   4  10   43.30    7.90
 -22   4  10   36.10    4.90
  22  -4 -10   27.70    4.60
 -21   3  10   -0.60    5.60
 -21   3  10    3.20    3.90
 -21   3  10   -1.80    3.80
  21  -3 -10    4.00    3.50
 -20   2  10   -3.20    3.50
 -20   2  10    3.30    5.90
 -20   2  10   -1.80    3.30
  20  -2 -10   -2.00    3.30
 -19   1  10   -4.20    3.10
 -19   1  10    1.80    3.40
 -19   1  10   -2.00    5.40
  19  -1 -10    0.10    3.10
 -18   0  10   36.30    4.20
 -18   0  10   27.10    3.90
 -18   0  10   36.30    5.90
  18   0 -10   34.70    3.80
 -17  -1  10   65.69    5.90
 -17  -1  10   71.99    7.30
 -17  -1  10   64.79    4.90
  17   1 -10   66.99    5.60
 -16  -2  10    7.30    3.10
 -16  -2  10    5.00    2.80
  16   2 -10    8.70    2.80
 -15  -3  10   73.49    6.20
 -15  -3  10   81.09    5.80
  15   3 -10   79.99    5.30
 -14  -4  10   67.59    5.80
 -14  -4  10   66.99    4.80
 -14  -4  10   77.89    5.50
  14   4 -10   76.59    7.70
  14   4 -10   67.19    5.10
 -13  -5  10   70.69    5.50
 -13  -5  10   65.39    6.00
 -13  -5  10   59.29    4.90
  13   5 -10   68.99    6.10
  13   5 -10   68.39    5.10
 -12  -6  10   14.60    3.00
 -12  -6  10    9.20    3.20
 -12  -6  10    8.20    2.60
  12   6 -10   13.40    3.90
  12   6 -10   11.20    2.70
 -11  -7  10  128.59    8.00
 -11  -7  10  126.39    7.50
 -11  -7  10  143.29    7.60
  11   7 -10  132.39    8.90
  11   7 -10  137.99    7.40
 -10  -8  10    6.90    3.20
 -10  -8  10    5.80    3.10
 -10  -8  10    5.80    3.60
  10   8 -10    1.90    4.10
  10   8 -10    2.80    2.80
  -9  -9  10  123.59    8.50
  -9  -9  10  127.59    7.70
   9   9 -10  129.89    8.10
  -8 -10  10   27.10    4.80
  -8 -10  10   26.30    3.80
  -8 -10  10   20.70    4.40
   8  10 -10   30.20    4.30
  -7 -11  10   28.80    5.00
  -7 -11  10   29.80    4.90
   7  11 -10   27.70    4.60
  -6 -12  10   77.49    6.60
  -6 -12  10   70.79    6.40
   6  12 -10   76.59    6.50
  -5 -13  10   19.50    4.80
  -5 -13  10   21.20    5.50
   5  13 -10   13.40    4.70
  -4 -14  10    6.10    4.80
  -4 -14  10    6.20    5.50
   4  14 -10   10.60    4.90
  -3 -15  10   -2.30    5.20
  -3 -15  10    2.20    5.00
   3  15 -10   -5.80    4.60
  -2 -16  10    0.20    5.50
   2  16 -10    9.10    5.50
  -1 -17  10    6.20    6.10
   1  17 -10    4.80    5.70
 -27   7  11    6.30    5.30
 -27   7  11   -5.50    8.00
 -26   6  11   27.40    9.30
 -26   6  11   22.50    5.50
 -25   5  11   -3.50    8.20
 -25   5  11    1.90    4.70
 -24   4  11    8.80    4.60
 -24   4  11    2.10    7.30
 -23   3  11   53.19    5.40
 -23   3  11   61.39    9.20
  23  -3 -11   50.69    5.10
 -22   2  11   59.39    6.10
 -22   2  11   63.39    5.60
 -22   2  11   77.79    9.30
  22  -2 -11   59.19    5.10
 -21   1  11   38.70    4.80
 -21   1  11   29.60    4.40
 -21   1  11   45.80    7.40
  21  -1 -11   36.40    4.20
 -20   0  11   -5.10    3.60
 -20   0  11   -3.70    3.30
 -20   0  11   -1.40    5.60
  20   0 -11    1.90    3.20
 -19  -1  11   80.39    7.10
 -19  -1  11   73.19    8.20
 -19  -1  11   86.69    6.80
  19   1 -11   73.89    6.40
 -18  -2  11   -1.10    3.30
 -18  -2  11    7.80    3.30
  18   2 -11   -0.50    2.90
 -17  -3  11  144.19    8.70
 -17  -3  11  154.48    8.30
  17   3 -11  149.19    7.80
 -16  -4  11    3.90    3.30
 -16  -4  11   -2.80    2.90
  16   4 -11   -4.80    2.40
 -15  -5  11   40.10    4.50
 -15  -5  11   42.20    4.00
 -15  -5  11   34.90    3.50
  15   5 -11   40.10    3.70
 -14  -6  11   60.79    5.10
 -14  -6  11   74.49    6.10
 -14  -6  11   65.59    5.40
  14   6 -11   60.99    4.60
 -13  -7  11   43.60    4.20
 -13  -7  11   42.10    4.60
 -13  -7  11   48.50    4.40
  13   7 -11   47.40    4.10
 -12  -8  11   10.50    3.80
 -12  -8  11   11.90    3.40
  12   8 -11    8.20    3.10
 -11  -9  11   -1.40    3.00
 -11  -9  11    0.10    3.90
  11   9 -11    2.20    3.10
 -10 -10  11   41.00    5.20
 -10 -10  11   36.40    4.40
 -10 -10  11   30.80    5.40
  10  10 -11   40.60    4.60
  -9 -11  11   12.00    4.60
  -9 -11  11   10.70    4.40
   9  11 -11    6.30    3.80
  -8 -12  11    5.00    4.60
  -8 -12  11    8.40    4.70
   8  12 -11   11.20    4.40
  -7 -13  11    9.20    5.20
  -7 -13  11    8.20    5.00
   7  13 -11    8.20    4.40
  -6 -14  11   52.99    6.10
  -6 -14  11   62.89    6.90
   6  14 -11   48.40    6.30
  -5 -15  11   -1.10    5.60
  -5 -15  11   -2.60    5.00
   5  15 -11   -1.00    4.60
  -4 -16  11   -5.10    5.70
   4  16 -11   -1.80    5.00
 -27   5  12    8.80    8.80
 -27   5  12   -1.70    5.00
 -26   4  12    4.20    4.80
 -26   4  12   -3.10    8.60
 -25   3  12    9.60    8.50
 -25   3  12    7.10    4.80
 -24   2  12    7.40    7.20
 -24   2  12   12.10    4.40
 -23   1  12   27.00    4.60
 -23   1  12   24.60    7.60
  23  -1 -12   16.40    3.90
 -22   0  12   42.20    5.10
 -22   0  12   50.29    8.10
  22   0 -12   40.00    4.40
 -21  -1  12   16.30    4.20
 -21  -1  12   12.60    4.00
  21   1 -12   23.60    3.80
 -20  -2  12   13.90    4.10
 -20  -2  12   18.60    4.00
  20   2 -12   16.30    3.50
 -19  -3  12   25.90    3.90
 -19  -3  12   27.20    4.40
  19   3 -12   25.20    3.50
 -18  -4  12   61.99    5.40
 -18  -4  12   59.19    5.00
  18   4 -12   62.99    5.70
 -17  -5  12   13.20    2.80
 -17  -5  12   15.30    4.20
 -17  -5  12   19.90    3.70
  17   5 -12   14.60    3.10
 -16  -6  12   -0.90    3.80
 -16  -6  12    0.80    3.20
 -16  -6  12   -0.70    2.70
  16   6 -12   -2.50    2.80
 -15  -7  12    0.90    3.90
 -15  -7  12    0.90    2.90
 -15  -7  12   -1.10    3.40
  15   7 -12    1.00    3.00
 -14  -8  12  119.29    8.10
 -14  -8  12  113.29    9.00
  14   8 -12  126.19    7.80
 -13  -9  12   -1.30    4.30
 -13  -9  12    0.60    3.30
  13   9 -12    2.40    3.40
 -12 -10  12   -1.20    4.40
  12  10 -12   -1.60    3.40
 -11 -11  12   -1.00    4.50
 -11 -11  12    0.30    4.90
  11  11 -12    2.70    3.90
 -10 -12  12   82.29    6.90
 -10 -12  12   80.19    7.30
  10  12 -12   74.79    6.40
  -9 -13  12   16.80    5.30
  -9 -13  12   15.00    5.70
   9  13 -12   12.70    4.60
  -8 -14  12    6.30    5.10
  -8 -14  12   -8.60    5.40
   8  14 -12    2.30    4.50
  -7 -15  12    8.90    5.40
  -7 -15  12    0.40    5.80
   7  15 -12    3.20    5.20
  -6 -16  12    8.70    5.80
  -6 -16  12   -0.50    5.90
   6  16 -12   -7.00    5.30
 -28   4  13    5.70    5.20
 -28   4  13    7.50    8.50
 -27   3  13   15.90    5.20
 -27   3  13   28.40    9.20
 -26   2  13    6.30    7.60
 -26   2  13    7.30    4.80
 -25   1  13   18.80    7.70
 -25   1  13   14.30    4.80
 -24   0  13   -3.20    7.20
 -24   0  13   -0.80    4.30
 -23  -1  13    5.80    4.30
  23   1 -13    5.10    3.70
 -22  -2  13   10.90    4.50
  22   2 -13   17.50    3.60
 -21  -3  13    3.80    4.20
  21   3 -13   -1.40    2.80
 -20  -4  13    2.50    4.20
 -20  -4  13    1.30    3.50
  20   4 -13    0.40    2.90
 -19  -5  13    0.50    4.20
 -19  -5  13    7.00    3.60
  19   5 -13   -0.80    2.90
 -18  -6  13   26.40    3.50
 -18  -6  13   38.00    5.10
 -18  -6  13   35.90    4.40
  18   6 -13   34.30    4.00
 -17  -7  13   10.80    3.70
 -17  -7  13   10.50    3.10
 -17  -7  13    7.80    4.30
 -16  -8  13    7.70    4.70
 -16  -8  13    9.10    4.00
  16   8 -13    3.10    3.20
 -15  -9  13   51.89    5.80
 -15  -9  13   55.19    5.40
  15   9 -13   49.50    5.00
 -14 -10  13   29.40    5.40
  14  10 -13   26.20    4.40
 -13 -11  13   79.19    7.00
  13  11 -13   62.19    6.00
 -12 -12  13    1.00    5.30
 -12 -12  13   -0.90    5.40
  12  12 -13   -0.20    4.00
 -11 -13  13    3.00    5.30
 -11 -13  13   17.20    5.70
  11  13 -13   12.70    4.70
 -10 -14  13    7.20    5.50
 -10 -14  13    1.60    5.40
  10  14 -13    1.50    4.90
  -9 -15  13   11.70    6.10
  -9 -15  13   17.80    6.00
   9  15 -13   15.80    5.70
  -8 -16  13   -0.20    6.20
  -8 -16  13    0.80    5.60
   8  16 -13   -0.90    5.60
 -28   2  14   -5.90    8.80
 -28   2  14   -2.60    5.00
 -27   1  14    0.80    4.90
 -26   0  14   41.90    5.70
 -25  -1  14   -2.70    4.70
 -24  -2  14   -3.40    4.70
 -23  -3  14   -0.90    4.50
 -22  -4  14   15.00    4.80
  22   4 -14   16.60    3.90
 -21  -5  14   10.00    4.70
  21   5 -14    1.30    3.20
 -20  -6  14    5.20    4.60
  20   6 -14   -1.20    3.20
 -19  -7  14   -0.50    4.60
  19   7 -14    2.20    3.40
 -18  -8  14   -2.10    4.80
  18   8 -14    1.00    3.30
 -17  -9  14   13.80    5.10
  17   9 -14   23.80    4.20
 -16 -10  14    9.80    5.20
  16  10 -14   10.00    4.00
 -15 -11  14    9.10    5.30
  15  11 -14   11.40    4.30
 -14 -12  14   -2.10    5.50
 -14 -12  14   -6.70    5.20
  14  12 -14   -0.90    4.10
 -13 -13  14   14.20    6.00
 -13 -13  14    4.60    5.60
  13  13 -14   19.80    5.10
 -12 -14  14    9.00    5.80
 -12 -14  14    2.60    5.60
 -11 -15  14    0.10    5.90
 -11 -15  14    4.90    5.90
  11  15 -14    0.10    5.20
 -28   0  15    1.10    5.20
 -27  -1  15    5.40    5.00
 -26  -2  15    4.20    5.20
 -25  -3  15    6.30    5.10
 -24  -4  15    2.20    4.90
 -23  -5  15   25.00    5.30
 -22  -6  15   -0.60    5.00
 -21  -7  15   21.70    5.50
 -20  -8  15    3.70    5.30
 -19  -9  15    4.30    5.20
 -18 -10  15    0.10    5.20
  18  10 -15   -0.50    4.20
 -17 -11  15    9.70    5.60
  17  11 -15   11.50    4.60
 -16 -12  15   -5.60    5.40
  16  12 -15    2.20    4.50
 -15 -13  15    5.20    6.20
 -15 -13  15   -0.70    5.70
  15  13 -15    0.10    4.80
 -14 -14  15   -5.90    5.90
 -14 -14  15    1.50    6.30
 -28  -2  16    2.90    5.40
 -27  -3  16   -0.70    5.30
 -26  -4  16    4.50    5.10
 -25  -5  16    2.80    5.30
 -24  -6  16    0.20    5.20
 -23  -7  16    6.30    5.50
 -22  -8  16    8.10    5.60
 -21  -9  16   10.50    5.60
 -20 -10  16   -1.00    5.50
 -19 -11  16   -4.00    5.60
 -18 -12  16   19.10    6.60
 -25  -7  17   -4.50    5.60
 -24  -8  17   -1.10    5.70
 -23  -9  17    0.30    5.70
 -25  -9  15   14.40    6.10
  18  14 -14   -4.40    4.90
 -18 -14  14   -0.80    6.00
  19  13 -14   10.10    4.80
 -19 -13  14    2.10    5.90
  20  12 -14    0.90    4.50
 -20 -12  14    9.50    5.80
 -21 -11  14   -0.50    5.50
 -22 -10  14    4.60    5.80
 -23  -9  14  -10.80    5.20
 -24  -8  14   12.40    5.70
 -25  -7  14   -3.20    5.20
 -26  -6  14    3.00    5.50
 -27  -5  14   -1.60    5.40
 -28  -4  14   13.10    5.90
  15  15 -13    4.20    5.00
 -15 -15  13    7.80    6.20
 -15 -15  13    7.20    6.00
  16  14 -13    8.60    5.00
 -16 -14  13   15.30    6.00
  17  13 -13   -7.90    4.10
 -17 -13  13    1.40    5.40
  18  12 -13   -0.10    4.10
 -18 -12  13   -5.50    5.20
  19  11 -13   23.90    5.00
 -19 -11  13   22.70    5.90
  20  10 -13   31.60    5.10
 -20 -10  13   37.00    6.10
  21   9 -13   -1.20    3.90
 -21  -9  13   -3.90    5.00
  22   8 -13   -3.80    3.90
 -22  -8  13    0.60    5.30
  23   7 -13   -2.30    3.80
 -23  -7  13   -2.90    4.90
  24   6 -13   22.50    4.90
 -24  -6  13   28.70    5.80
 -25  -5  13    7.70    5.10
 -26  -4  13   -1.90    5.10
 -27  -3  13    9.80    5.40
 -28  -2  13    3.50    5.30
 -29  -1  13   13.00    5.70
  12  16 -12   15.70    5.60
 -12 -16  12   17.30    6.00
 -12 -16  12   23.00    6.90
  13  15 -12   -1.70    4.70
 -13 -15  12   -4.30    5.40
 -13 -15  12   -3.70    5.70
  14  14 -12   -2.60    4.60
 -14 -14  12    5.40    5.60
  15  13 -12    2.10    4.10
 -15 -13  12    9.80    5.70
  16  12 -12   51.89    5.80
 -16 -12  12   55.09    6.90
  17  11 -12    9.70    4.40
 -17 -11  12    8.90    5.30
  18  10 -12    8.50    4.30
 -18 -10  12    1.80    5.10
  19   9 -12   24.60    4.70
 -19  -9  12   28.60    5.80
  20   8 -12   70.59    6.30
 -20  -8  12   79.99    7.20
  21   7 -12   51.89    5.30
 -21  -7  12   54.69    6.10
  22   6 -12  -12.10    3.50
 -22  -6  12   -1.90    4.80
  23   5 -12    7.60    4.00
 -23  -5  12    7.60    5.10
  24   4 -12    1.50    4.20
 -24  -4  12    4.60    4.80
  25   3 -12   13.30    4.80
 -25  -3  12    6.00    5.10
 -26  -2  12    9.50    5.00
 -27  -1  12   19.80    5.50
 -28   0  12    4.90    5.30
 -29   1  12    6.80    5.40
   9  17 -11    0.00    5.10
  -9 -17  11   14.40    6.60
  10  16 -11   -2.00    4.60
 -10 -16  11   -8.40    6.10
 -10 -16  11   -3.10    4.90
  11  15 -11   20.30    5.10
 -11 -15  11   16.20    5.80
 -11 -15  11   15.30    5.40
  12  14 -11   13.40    5.10
 -12 -14  11    9.30    5.30
 -12 -14  11   12.80    5.20
  13  13 -11   30.80    4.90
 -13 -13  11   29.30    5.60
  14  12 -11   10.50    4.20
 -14 -12  11   20.70    5.80
  15  11 -11   28.80    4.70
 -15 -11  11   29.10    5.60
  16  10 -11    8.70    3.80
 -16 -10  11   -2.80    4.70
  17   9 -11  108.59    7.90
 -17  -9  11   75.29    6.30
 -17  -9  11   99.19    8.90
  18   8 -11    6.00    3.60
 -18  -8  11    6.40    4.50
 -18  -8  11    3.30    2.50
 -18  -8  11    4.50    4.00
  19   7 -11   40.60    4.70
 -19  -7  11   35.20    4.60
 -19  -7  11   33.20    5.20
  20   6 -11   12.20    3.90
 -20  -6  11   16.60    4.30
 -20  -6  11   22.80    4.90
  21   5 -11    2.00    3.70
 -21  -5  11    5.00    4.00
 -21  -5  11    4.80    4.50
  22   4 -11   -3.20    3.70
 -22  -4  11   -1.30    4.00
 -22  -4  11    2.00    4.30
  23   3 -11   41.40    5.00
 -23  -3  11   45.90    5.60
  24   2 -11   61.79    5.90
 -24  -2  11   78.39    6.60
  25   1 -11   12.10    4.60
 -25  -1  11   13.40    5.00
 -26   0  11    0.70    4.60
 -27   1  11   10.50    5.20
 -28   2  11   47.60    6.60
   7  17 -10    5.00    5.70
  -7 -17  10    8.10    5.90
   8  16 -10   -8.10    4.60
  -8 -16  10   -8.00    5.30
  -8 -16  10   -0.70    4.70
   9  15 -10   20.30    5.30
  -9 -15  10   20.30    5.90
  -9 -15  10   23.80    5.30
  10  14 -10    4.00    4.20
 -10 -14  10    6.10    4.70
 -10 -14  10    8.50    5.60
  11  13 -10   53.59    5.50
 -11 -13  10   43.60    5.80
  12  12 -10    2.30    3.50
 -12 -12  10    5.00    4.50
  13  11 -10   45.70    4.90
 -13 -11  10   35.30    5.20
  14  10 -10   -2.40    3.40
 -14 -10  10   -2.30    4.30
  15   9 -10   36.60    4.40
 -15  -9  10   45.40    4.80
 -15  -9  10   37.20    5.20
 -15  -9  10   37.90    4.00
  16   8 -10   59.89    5.20
 -16  -8  10   61.19    5.70
 -16  -8  10   61.59    5.20
 -16  -8  10   58.39    5.10
  17   7 -10   12.10    3.50
 -17  -7  10   11.60    4.10
 -17  -7  10   10.90    3.60
 -17  -7  10    9.50    2.50
  18   6 -10    7.60    3.40
 -18  -6  10   -2.30    4.20
 -18  -6  10    3.40    3.50
  19   5 -10   -1.60    3.40
 -19  -5  10   -0.60    3.90
 -19  -5  10    0.70    3.50
  20   4 -10   81.39    7.20
 -20  -4  10   69.99    6.00
 -20  -4  10   72.39    5.90
  21   3 -10    0.00    3.70
 -21  -3  10    8.10    4.20
 -21  -3  10    3.70    3.60
  22   2 -10   -3.40    3.60
 -22  -2  10   -1.00    3.80
 -22  -2  10    1.10    4.20
  23   1 -10    6.70    4.10
 -23  -1  10    9.10    4.60
 -23  -1  10    6.20    4.00
  24   0 -10   45.80    5.40
 -24   0  10   47.50    5.70
  25  -1 -10    7.30    4.50
 -25   1  10    8.70    5.00
 -26   2  10    5.80    4.90
 -26   2  10   13.10    7.70
 -27   3  10   11.50    5.50
 -27   3  10    8.80    8.30
 -28   4  10    6.40    5.90
 -28   4  10   10.30    8.80
   4  18  -9    2.00    5.70
  -4 -18   9   -8.00    5.50
   5  17  -9   -3.00    5.00
  -5 -17   9   -3.20    5.60
   6  16  -9    3.00    4.60
  -6 -16   9   -1.30    5.30
  -6 -16   9    5.70    4.30
   7  15  -9    9.00    4.60
  -7 -15   9   16.70    4.70
  -7 -15   9   17.60    5.70
   8  14  -9   35.10    5.50
  -8 -14   9   39.20    5.40
  -8 -14   9   44.70    6.20
   9  13  -9   15.10    4.60
  -9 -13   9   18.30    4.90
  -9 -13   9   18.80    4.70
  10  12  -9    1.50    3.40
 -10 -12   9    3.70    4.20
  11  11  -9   34.40    4.30
 -11 -11   9   35.90    5.30
  12  10  -9   75.69    5.90
 -12 -10   9   83.49    6.50
  13   9  -9    8.20    3.40
 -13  -9   9    3.80    3.70
 -13  -9   9    4.00    2.80
 -13  -9   9    2.70    3.20
  14   8  -9   10.40    3.20
 -14  -8   9   12.70    3.40
 -14  -8   9   12.40    4.10
 -14  -8   9    8.30    2.60
  15   7  -9    7.30    3.10
 -15  -7   9    6.30    3.50
 -15  -7   9    5.70    3.30
 -15  -7   9    8.10    2.40
  16   6  -9  387.76   15.90
 -16  -6   9  346.97   16.20
 -16  -6   9  386.76   16.10
  17   5  -9   16.20    3.60
 -17  -5   9   17.70    3.70
 -17  -5   9   15.60    4.00
  18   4  -9    9.10    3.40
 -18  -4   9    2.60    3.60
 -18  -4   9    7.70    3.40
  19   3  -9    1.30    3.40
 -19  -3   9   -1.50    3.70
 -19  -3   9    4.80    3.60
  20   2  -9   43.10    4.70
 -20  -2   9   33.30    4.70
 -20  -2   9   33.90    4.60
  21   1  -9   35.80    4.60
 -21  -1   9   26.60    4.50
 -21  -1   9   30.00    4.30
  22   0  -9    4.20    4.00
 -22   0   9    2.50    4.20
 -22   0   9    0.10    3.40
  23  -1  -9   15.00    4.60
 -23   1   9   16.30    4.20
 -23   1   9   12.10    4.50
 -23   1   9   10.90    6.70
  24  -2  -9   39.90    5.40
 -24   2   9   47.30    5.90
 -24   2   9   48.90    8.40
  25  -3  -9    5.70    4.80
 -25   3   9    4.40    7.40
 -25   3   9    6.70    5.00
 -26   4   9    0.00    7.80
 -26   4   9   -0.80    4.80
 -27   5   9   10.50    5.60
 -27   5   9    4.40    7.90
   2  18  -8   -1.50    5.70
  -2 -18   8    5.40    6.30
   3  17  -8   16.20    5.30
  -3 -17   8   10.60    6.10
   4  16  -8   21.80    5.40
  -4 -16   8   18.40    6.30
  -4 -16   8   22.00    4.60
   5  15  -8    4.90    4.30
  -5 -15   8   11.30    5.00
  -5 -15   8   12.00    4.10
   6  14  -8   13.60    4.60
  -6 -14   8   10.40    4.80
  -6 -14   8   19.60    4.30
   7  13  -8   -2.40    3.80
   7  13  -8    1.30    4.50
  -7 -13   8    0.80    4.70
  -7 -13   8    3.80    3.90
   8  12  -8   34.10    4.40
   8  12  -8   25.60    4.80
  -8 -12   8   28.90    5.20
   9  11  -8    0.30    3.30
   9  11  -8   -0.10    3.60
  -9 -11   8   -2.10    3.70
  10  10  -8   42.70    4.70
  10  10  -8   40.00    4.20
 -10 -10   8   60.09    5.40
 -10 -10   8   42.10    4.40
  11   9  -8   42.10    4.40
 -11  -9   8   37.30    4.60
 -11  -9   8   34.20    3.80
 -11  -9   8   43.50    4.30
  12   8  -8  219.48   10.20
 -12  -8   8  217.28   10.20
 -12  -8   8  205.68    9.70
 -12  -8   8  198.68   10.60
  13   7  -8   -1.90    2.70
 -13  -7   8   -3.50    2.10
 -13  -7   8    1.40    3.00
 -13  -7   8    1.50    2.90
  14   6  -8   54.69    4.30
 -14  -6   8   46.50    4.40
 -14  -6   8   35.20    3.10
 -14  -6   8   44.90    4.20
  15   5  -8  515.25   20.40
 -15  -5   8  517.15   20.40
 -15  -5   8  484.05   20.50
  16   4  -8  242.58   11.20
 -16  -4   8  249.78   11.30
 -16  -4   8  225.48   11.30
  17   3  -8  194.98    9.80
 -17  -3   8  185.38    9.90
 -17  -3   8  196.38    9.80
  18   2  -8    5.10    3.40
 -18  -2   8    3.40    3.20
 -18  -2   8    7.40    3.40
  19   1  -8   75.09    5.60
 -19  -1   8   54.69    5.20
 -19  -1   8   81.49    6.70
  20   0  -8   -0.30    3.80
 -20   0   8    6.30    5.60
 -20   0   8    2.30    3.50
 -20   0   8   -2.10    3.60
  21  -1  -8   75.89    6.30
 -21   1   8   91.29    7.30
 -21   1   8   75.59    6.20
 -21   1   8   89.49    8.70
  22  -2  -8   -3.00    4.10
 -22   2   8   -2.30    4.10
 -22   2   8   -0.80    4.00
 -22   2   8   -7.10    6.10
  23  -3  -8  114.79    9.40
 -23   3   8  124.49   12.50
 -23   3   8  125.79    9.70
  24  -4  -8    0.30    4.60
 -24   4   8   -3.20    6.90
 -24   4   8   11.20    4.90
 -25   5   8   11.50    7.90
 -25   5   8   10.30    5.10
 -26   6   8    1.80    5.00
 -26   6   8   -0.20    8.10
   0  18  -7   25.20    6.00
   0 -18   7   27.90    7.10
   1  17  -7   -3.00    5.40
  -1 -17   7   -5.40    5.20
   2  16  -7   -2.60    4.70
  -2 -16   7    4.70    5.10
   3  15  -7   -2.30    4.50
   3  15  -7   -0.30    5.20
  -3 -15   7   -7.00    3.70
  -3 -15   7    4.20    5.10
   4  14  -7  111.49    9.00
   4  14  -7  116.69    9.50
  -4 -14   7  117.79    7.90
  -4 -14   7  109.49    9.60
   5  13  -7   -5.20    4.30
   5  13  -7   -1.40    3.50
  -5 -13   7   -0.10    3.60
  -5 -13   7   -5.50    4.00
   6  12  -7   15.30    4.00
   6  12  -7   14.20    4.40
  -6 -12   7   13.30    4.10
  -6 -12   7   16.50    3.80
   7  11  -7  165.18    9.70
   7  11  -7  170.18    9.30
  -7 -11   7  160.98    9.50
   8  10  -7   99.19    7.30
   8  10  -7  102.79    6.90
  -8 -10   7   94.59    6.50
  -8 -10   7   79.99    7.20
   9   9  -7   43.10    4.20
   9   9  -7   39.50    4.30
  -9  -9   7   36.10    3.70
  -9  -9   7   36.10    4.10
  -9  -9   7   36.90    3.90
  10   8  -7   37.80    3.60
  10   8  -7   42.70    4.00
 -10  -8   7   34.60    3.40
 -10  -8   7   31.90    3.70
 -10  -8   7   38.20    3.60
  11   7  -7  202.78    9.50
  11   7  -7  186.58    9.20
 -11  -7   7  208.68    9.60
 -11  -7   7  213.68   10.00
 -11  -7   7  205.38    9.10
  12   6  -7    2.30    3.40
  12   6  -7    2.20    2.40
  12   6  -7    4.40    2.10
 -12  -6   7    3.50    2.90
 -12  -6   7    3.70    2.10
 -12  -6   7    0.40    2.30
  13   5  -7   52.29    4.70
  13   5  -7   49.60    5.20
  13   5  -7   56.49    4.20
 -13  -5   7   50.29    4.10
 -13  -5   7   40.90    3.70
 -13  -5   7   54.39    4.10
  14   4  -7   35.60    4.80
  14   4  -7   51.59    4.60
  14   4  -7   38.40    3.80
 -14  -4   7   39.70    3.90
 -14  -4   7   61.59    5.10
  15   3  -7  451.65   18.20
  15   3  -7  440.76   18.30
 -15  -3   7  437.06   18.20
 -15  -3   7  456.85   18.20
  16   2  -7   55.59    4.50
 -16  -2   7   43.60    4.30
 -16  -2   7   56.89    4.60
  17   1  -7   46.70    4.50
 -17  -1   7   44.40    4.40
 -17  -1   7   47.00    4.50
  18   0  -7   -2.40    3.40
 -18   0   7   -2.50    4.80
 -18   0   7   -1.20    3.30
 -18   0   7   -6.70    3.00
  19  -1  -7   24.90    4.40
 -19   1   7   20.10    3.80
 -19   1   7   27.20    6.10
 -19   1   7   26.00    4.30
  20  -2  -7   73.89    6.00
 -20   2   7   77.79    6.10
 -20   2   7   81.89    7.30
 -20   2   7   82.79    8.30
  21  -3  -7   41.40    5.00
 -21   3   7   46.90    5.10
 -21   3   7   43.60    5.00
  22  -4  -7   21.50    4.80
 -22   4   7   22.00    6.90
 -22   4   7   14.10    4.60
 -22   4   7   16.80    4.60
  23  -5  -7    5.80    4.90
 -23   5   7   -0.80    4.50
 -23   5   7    2.80    6.50
  24  -6  -7   75.69    7.50
 -24   6   7   86.79    9.80
 -24   6   7   70.69    7.20
 -25   7   7    6.30    5.30
 -25   7   7    2.10    7.60
 -26   8   7    0.50    8.00
 -26   8   7    0.00    5.30
  -2  18  -6   -7.90    5.10
   2 -18   6    1.00    5.50
  -1  17  -6    4.70    5.50
   1 -17   6   14.60    5.90
   0  16  -6   24.30    5.20
   0 -16   6   40.00    6.60
   1  15  -6   24.50    5.60
   1  15  -6   18.50    4.80
  -1 -15   6   34.50    5.80
   2  14  -6   -1.80    3.90
   2  14  -6   -1.30    4.60
  -2 -14   6   -0.30    4.50
   3  13  -6   53.59    5.80
   3  13  -6   46.50    5.10
  -3 -13   6   61.79    6.00
  -3 -13   6   57.09    6.10
   4  12  -6   40.70    4.70
   4  12  -6   29.30    5.00
  -4 -12   6   33.30    4.10
  -4 -12   6   38.00    5.20
   5  11  -6  178.88    9.90
   5  11  -6  179.68    9.50
  -5 -11   6  180.08    9.40
  -5 -11   6  174.08    9.80
   6  10  -6    0.80    2.50
   6  10  -6    2.30    3.20
  -6 -10   6    0.70    3.10
  -6 -10   6   -0.10    2.50
   7   9  -6   92.19    5.80
   7   9  -6   77.79    6.40
   7   9  -6   97.19    6.10
  -7  -9   6   90.59    6.50
  -7  -9   6   92.79    6.10
  -7  -9   6   95.19    5.90
   8   8  -6   16.00    3.10
   8   8  -6   16.60    2.80
   8   8  -6   17.60    2.80
  -8  -8   6   19.30    3.10
  -8  -8   6   20.60    2.90
  -8  -8   6   14.70    2.80
   9   7  -6  167.98    8.20
   9   7  -6  182.78    8.40
   9   7  -6  180.28    8.50
  -9  -7   6  183.38    8.50
  -9  -7   6  164.88    8.70
  -9  -7   6  192.78    8.20
  10   6  -6   27.60    2.90
  10   6  -6   29.50    3.00
 -10  -6   6   26.30    2.70
 -10  -6   6   27.00    3.20
 -10  -6   6   24.80    3.30
  11   5  -6  215.88    9.70
  11   5  -6  198.88    9.20
  11   5  -6  212.58   11.50
  11   5  -6  220.48    9.50
 -11  -5   6  227.98    9.80
 -11  -5   6  223.98    9.00
 -11  -5   6  221.88    9.80
  12   4  -6  311.47   12.80
  12   4  -6  284.77   14.90
  12   4  -6  307.47   12.80
 -12  -4   6  327.77   12.90
 -12  -4   6  301.27   12.90
  13   3  -6  404.26   16.40
  13   3  -6  410.66   18.80
  13   3  -6  393.76   16.30
 -13  -3   6  392.76   16.40
 -13  -3   6  417.56   16.40
  14   2  -6    6.50    2.80
  14   2  -6    9.70    2.50
 -14  -2   6    8.10    2.80
 -14  -2   6    7.80    2.70
  15   1  -6    1.30    3.20
  15   1  -6    1.20    2.90
 -15  -1   6   -0.70    2.60
 -15  -1   6   -1.40    2.70
  16   0  -6  133.49    7.90
 -16   0   6  119.49    7.60
 -16   0   6  134.39    7.60
 -16   0   6  142.59    9.60
  17  -1  -6   -4.60    3.10
 -17   1   6   -1.90    3.20
 -17   1   6   -2.90    2.70
 -17   1   6   -2.60    4.10
  18  -2  -6    5.70    3.60
 -18   2   6    5.70    4.70
 -18   2   6    4.00    3.20
 -18   2   6    5.80    3.50
  19  -3  -6   23.00    4.70
 -19   3   6   23.20    5.90
 -19   3   6   19.10    4.10
 -19   3   6   23.00    4.10
  20  -4  -6  346.27   16.40
 -20   4   6  355.46   18.90
 -20   4   6  354.56   16.10
 -20   4   6  354.56   16.20
  21  -5  -6   17.60    5.30
 -21   5   6   14.90    4.50
 -21   5   6   15.20    6.20
  22  -6  -6   -2.70    5.00
 -22   6   6   -2.10    6.00
  23  -7  -6    3.30    5.40
 -23   7   6   -1.90    6.40
 -24   8   6   35.40    7.90
 -25   9   6   19.90    7.90
  -4  18  -5   10.50    5.60
   4 -18   5    9.70    5.90
  -3  17  -5    8.10    5.10
   3 -17   5    8.80    6.10
  -2  16  -5    2.70    5.50
  -2  16  -5   -4.30    4.60
   2 -16   5    1.80    4.80
  -1  15  -5   53.19    5.90
  -1  15  -5   65.89    7.00
   1 -15   5   57.09    6.10
   0  14  -5    5.40    4.70
   0  14  -5    1.60    4.00
   0 -14   5   -2.10    4.60
   1  13  -5   43.70    5.60
   1  13  -5   44.70    4.90
  -1 -13   5   56.39    5.90
   2  12  -5    5.20    4.10
   2  12  -5    3.00    3.10
  -2 -12   5   -0.30    3.10
  -2 -12   5    0.70    3.50
   3  11  -5  197.98   10.20
   3  11  -5  184.38    9.40
  -3 -11   5  172.58    9.00
  -3 -11   5  167.58    9.60
   4  10  -5   17.50    3.00
   4  10  -5   23.20    3.90
   4  10  -5   15.50    2.80
  -4 -10   5   26.20    3.20
  -4 -10   5   16.60    3.30
  -4 -10   5   18.20    2.90
  -4 -10   5   19.90    3.20
   5   9  -5   29.50    3.30
   5   9  -5   35.60    3.40
   5   9  -5   36.10    4.20
  -5  -9   5   32.50    3.80
  -5  -9   5   30.90    3.10
  -5  -9   5   31.60    3.40
   6   8  -5    3.10    2.00
   6   8  -5    2.70    2.30
   6   8  -5   -2.80    2.50
  -6  -8   5    4.60    2.60
  -6  -8   5   -0.70    2.30
  -6  -8   5    2.40    2.00
   7   7  -5   33.50    3.40
   7   7  -5   25.00    2.80
   7   7  -5   34.40    3.10
  -7  -7   5   28.50    3.20
  -7  -7   5   31.10    3.00
  -7  -7   5   30.20    3.10
   8   6  -5  382.76   15.70
   8   6  -5  398.46   15.80
   8   6  -5  396.46   15.70
  -8  -6   5  385.96   16.00
  -8  -6   5  404.56   15.60
  -8  -6   5  409.26   15.90
   9   5  -5  122.49    6.40
   9   5  -5  125.89    6.10
  -9  -5   5  127.09    5.90
  -9  -5   5  115.79    6.50
  -9  -5   5  122.19    6.30
  10   4  -5    2.70    2.30
  10   4  -5    1.30    2.60
  10   4  -5    1.80    1.80
 -10  -4   5   -1.30    1.40
 -10  -4   5    1.20    2.00
 -10  -4   5    1.40    2.10
  11   3  -5   20.60    3.50
  11   3  -5   31.60    3.00
 -11  -3   5   26.70    2.90
 -11  -3   5   27.30    2.80
  12   2  -5  630.64   24.00
  12   2  -5  616.64   24.00
 -12  -2   5  602.24   24.00
 -12  -2   5  626.74   24.00
  13   1  -5   87.69    6.00
  13   1  -5   89.59    6.90
 -13  -1   5   90.39    5.80
 -13  -1   5   88.29    6.90
 -13  -1   5   83.19    5.60
  14   0  -5   -4.00    2.60
  14   0  -5   -3.60    2.90
 -14   0   5   -2.10    3.30
 -14   0   5   -6.40    2.60
 -14   0   5   -2.70    2.40
  15  -1  -5  156.78    9.90
  15  -1  -5  178.18    9.00
 -15   1   5  174.38    8.70
 -15   1   5  171.18   10.60
 -15   1   5  186.58    8.80
  16  -2  -5   53.99    4.90
 -16   2   5   65.29    5.90
 -16   2   5   57.79    4.60
 -16   2   5   49.60    5.70
  17  -3  -5  236.28   11.80
 -17   3   5  231.78   13.30
 -17   3   5  229.98   11.20
  18  -4  -5    1.80    4.00
 -18   4   5    1.90    4.80
 -18   4   5   -3.20    3.30
  19  -5  -5  120.69   10.00
 -19   5   5  131.49   11.20
 -19   5   5  135.79    9.10
  20  -6  -5    4.50    4.90
 -20   6   5    9.10    5.60
  21  -7  -5   87.89    7.60
 -21   7   5  110.99   10.90
  22  -8  -5   11.70    5.50
 -22   8   5   14.00    6.20
  23  -9  -5   20.30    6.50
 -23   9   5   21.20    7.00
 -24  10   5   -1.70    6.90
  -6  18  -4    2.60    5.30
   6 -18   4   -1.20    5.50
  -5  17  -4   23.20    5.60
   5 -17   4   26.00    5.80
  -4  16  -4   12.60    5.70
  -4  16  -4    3.90    4.60
   4 -16   4    5.10    5.20
  -3  15  -4   12.00    5.10
  -3  15  -4    9.20    5.30
   3 -15   4    7.30    4.70
  -2  14  -4    3.50    4.40
  -2  14  -4    7.30    5.00
   2 -14   4    4.10    4.20
  -1  13  -4   32.70    4.80
  -1  13  -4   25.30    5.00
   1 -13   4   34.10    5.30
   0  12  -4  156.48    8.80
   0  12  -4  152.78    9.70
   0 -12   4  152.88    9.40
   1  11  -4   54.69    5.20
   1  11  -4   37.70    4.10
  -1 -11   4   50.79    3.90
  -1 -11   4   49.30    4.70
   2  10  -4   -0.90    3.10
   2  10  -4    1.80    2.50
   2  10  -4   -0.50    2.10
  -2 -10   4   -1.30    2.80
  -2 -10   4    0.00    2.50
  -2 -10   4    0.50    2.30
  -2 -10   4    4.90    2.20
   3   9  -4   77.39    5.80
   3   9  -4   64.79    5.00
   3   9  -4   65.49    4.80
  -3  -9   4   63.99    5.20
  -3  -9   4   63.19    4.80
  -3  -9   4   64.99    4.60
  -3  -9   4   69.79    4.90
   4   8  -4  305.57   12.70
   4   8  -4  302.27   12.30
   4   8  -4  299.97   12.40
  -4  -8   4  285.07   12.50
  -4  -8   4  287.67   12.40
  -4  -8   4  297.07   12.30
   5   7  -4  103.49    6.10
   5   7  -4  106.39    5.90
   5   7  -4  110.69    5.80
  -5  -7   4  107.49    5.90
  -5  -7   4  102.19    5.90
  -5  -7   4  104.89    5.70
   6   6  -4   56.39    4.00
   6   6  -4   55.19    4.00
   6   6  -4   47.00    4.20
  -6  -6   4   57.59    4.10
  -6  -6   4   51.79    4.00
  -6  -6   4   49.40    4.40
   7   5  -4   15.50    2.10
   7   5  -4   16.30    2.30
   7   5  -4   16.90    2.20
  -7  -5   4   21.10    2.60
  -7  -5   4   17.10    2.20
  -7  -5   4   17.40    2.10
   8   4  -4  122.79    5.70
   8   4  -4  130.89    6.10
  -8  -4   4  128.29    5.60
  -8  -4   4  125.59    6.10
  -8  -4   4  124.79    6.20
   9   3  -4   24.80    2.50
  -9  -3   4   24.40    2.50
  -9  -3   4   21.50    2.50
  10   2  -4    8.10    1.90
  10   2  -4    5.30    2.20
 -10  -2   4    6.70    2.00
 -10  -2   4    6.80    2.10
  11   1  -4  545.95   21.80
  11   1  -4  576.54   24.80
 -11  -1   4  560.64   24.70
 -11  -1   4  579.34   21.90
 -11  -1   4  547.15   21.80
  12   0  -4   33.90    3.30
  12   0  -4   31.50    4.00
 -12   0   4   34.90    3.40
 -12   0   4   31.60    3.20
 -12   0   4   33.60    4.10
  13  -1  -4  140.39    7.70
  13  -1  -4  141.79    8.40
 -13   1   4  153.48    7.30
 -13   1   4  138.19    7.30
 -13   1   4  122.49    8.40
  14  -2  -4    1.50    2.30
  14  -2  -4    6.10    3.30
  14  -2  -4    1.60    3.10
 -14   2   4    0.10    2.40
 -14   2   4    3.80    3.50
  15  -3  -4  162.48    9.20
 -15   3   4  163.98   10.20
 -15   3   4  162.18    8.50
  16  -4  -4   12.50    3.90
 -16   4   4   16.80    4.40
 -16   4   4   17.80    3.60
  17  -5  -4   58.59    5.60
 -17   5   4   68.59    6.70
 -17   5   4   67.49    5.50
  18  -6  -4   -1.00    4.50
 -18   6   4    1.20    4.00
 -18   6   4    5.50    4.80
  19  -7  -4   30.10    5.50
 -19   7   4   28.10    5.90
  20  -8  -4   58.39    6.70
 -20   8   4   67.19    7.60
  21  -9  -4   20.80    5.80
 -21   9   4   11.60    6.10
  22 -10  -4    1.20    5.70
 -22  10   4    2.30    6.20
  -8  18  -3   18.00    5.80
   8 -18   3   31.20    6.80
  -7  17  -3   -3.80    5.20
   7 -17   3   -2.10    5.00
  -6  16  -3    5.70    5.20
  -6  16  -3    8.70    5.70
   6 -16   3    3.80    4.90
  -5  15  -3   -0.20    5.30
  -5  15  -3   11.10    4.90
   5 -15   3   -4.70    4.70
  -4  14  -3   20.00    4.60
  -4  14  -3   28.10    5.50
   4 -14   3   24.50    5.00
  -3  13  -3   -3.10    3.60
  -3  13  -3    3.10    4.70
   3 -13   3   -1.90    3.90
  -2  12  -3    3.70    3.70
  -2  12  -3    2.90    4.00
   2 -12   3    2.70    3.90
  -1  11  -3   25.30    3.70
  -1  11  -3   19.90    3.30
  -1  11  -3   27.20    4.20
   1 -11   3   27.40    3.90
   0  10  -3  246.38   11.10
   0  10  -3  245.48   11.50
   0  10  -3  252.37   10.90
   0 -10   3  243.88   10.80
   0 -10   3  245.28   11.40
   1   9  -3    3.80    2.80
   1   9  -3    3.20    2.30
   1   9  -3    3.00    2.30
  -1  -9   3    1.70    2.60
  -1  -9   3    1.40    1.90
  -1  -9   3    4.30    2.10
   2   8  -3  415.36   16.20
   2   8  -3  394.16   16.00
   2   8  -3  392.56   15.90
  -2  -8   3  390.46   15.90
  -2  -8   3  406.36   16.60
  -2  -8   3  396.46   16.00
  -2  -8   3  399.76   16.10
   3   7  -3    3.60    1.90
   3   7  -3    7.70    2.10
   3   7  -3    6.30    2.40
  -3  -7   3    5.10    2.20
  -3  -7   3   10.30    2.10
  -3  -7   3    7.80    2.30
   4   6  -3  209.88    8.60
   4   6  -3  191.38    8.70
   4   6  -3  202.38    8.60
  -4  -6   3  194.18    8.60
  -4  -6   3  204.38    8.60
  -4  -6   3  203.18    8.60
   5   5  -3  127.99    6.10
   5   5  -3  130.89    6.10
   5   5  -3  130.69    6.10
  -5  -5   3  135.29    6.20
  -5  -5   3  139.29    6.10
  -5  -5   3  129.39    6.20
   6   4  -3  212.08    8.70
   6   4  -3  214.98    8.50
   6   4  -3  171.98    8.50
  -6  -4   3  216.58    8.70
  -6  -4   3  212.78    8.80
  -6  -4   3  218.38    8.40
   7   3  -3  407.06   15.90
   7   3  -3  397.86   15.50
  -7  -3   3  417.76   15.90
  -7  -3   3  417.56   15.50
  -7  -3   3  408.16   16.00
   8   2  -3   49.50    3.90
  -8  -2   3   50.99    3.90
   9   1  -3  447.56   17.60
   9   1  -3  456.15   20.00
  -9  -1   3  459.25   17.60
  -9  -1   3  439.46   17.60
  10   0  -3   -0.20    2.20
  10   0  -3   -0.40    2.50
 -10   0   3   -1.80    2.00
 -10   0   3   -4.40    2.00
 -10   0   3   -0.90    2.40
  11  -1  -3  179.68    9.40
  11  -1  -3  172.88    8.40
 -11   1   3  150.88    9.00
 -11   1   3  180.48    8.00
  12  -2  -3  144.69    7.70
  12  -2  -3  169.38    8.40
  12  -2  -3  153.28    9.10
 -12   2   3  169.88    7.90
 -12   2   3  173.78    9.40
  13  -3  -3  110.49    6.90
  13  -3  -3  107.09    6.30
 -13   3   3   97.49    7.50
 -13   3   3  109.19    6.40
  14  -4  -3   39.30    4.40
 -14   4   3   53.29    4.50
 -14   4   3   50.79    5.10
  15  -5  -3   31.90    4.40
 -15   5   3   36.40    4.90
 -15   5   3   32.10    4.00
  16  -6  -3   97.39    8.20
 -16   6   3   91.59    8.40
 -16   6   3   84.59    7.40
  17  -7  -3   47.90    5.40
 -17   7   3   39.60    5.70
 -17   7   3   33.60    4.60
  18  -8  -3   -0.90    4.80
  18  -8  -3   -4.20    2.80
 -18   8   3   -6.50    4.70
  19  -9  -3   11.30    5.50
 -19   9   3    7.20    5.40
  20 -10  -3   54.59    6.80
 -20  10   3   64.59    7.80
  21 -11  -3   -0.20    5.60
 -21  11   3    3.70    6.10
  -9  17  -2    2.20    4.90
   9 -17   2   -3.30    5.60
  -8  16  -2   23.30    6.00
  -8  16  -2   27.00    6.10
   8 -16   2   29.20    6.10
  -7  15  -2    4.50    5.40
  -7  15  -2    3.10    4.50
   7 -15   2   -2.10    4.60
  -6  14  -2    0.20    4.10
  -6  14  -2    3.60    4.70
   6 -14   2   -1.20    4.60
  -5  13  -2   62.49    5.90
  -5  13  -2   56.29    6.10
   5 -13   2   50.69    5.50
  -4  12  -2   82.19    7.30
  -4  12  -2   86.99    6.80
   4 -12   2   94.29    7.70
  -3  11  -2   50.39    4.50
  -3  11  -2   49.50    5.10
  -3  11  -2   63.29    4.70
   3 -11   2   59.09    5.00
  -2  10  -2   -1.30    2.10
  -2  10  -2   -1.60    2.00
  -2  10  -2   -0.10    3.20
   2 -10   2    4.80    2.60
   2 -10   2    0.50    2.00
   2 -10   2    0.10    2.90
  -1   9  -2   84.29    5.30
  -1   9  -2   88.89    5.40
  -1   9  -2   87.69    6.20
   1  -9   2   77.49    5.20
   1  -9   2   81.69    6.00
   1  -9   2   96.09    5.90
   0   8  -2  494.25   19.40
   0   8  -2  500.55   19.30
   0   8  -2  481.25   19.30
   0  -8   2  485.15   19.40
   0  -8   2  488.35   19.20
   1   7  -2  172.58    7.40
   1   7  -2  173.08    7.80
   1   7  -2  166.18    7.40
  -1  -7   2  168.28    7.60
  -1  -7   2  170.68    7.30
  -1  -7   2  139.99    7.20
   2   6  -2    2.90    1.60
   2   6  -2    4.10    1.60
   2   6  -2    3.90    1.90
  -2  -6   2    4.00    1.80
  -2  -6   2    3.60    1.70
  -2  -6   2    3.50    1.80
   3   5  -2  266.77   10.80
   3   5  -2  262.27   10.70
   3   5  -2  275.77   10.90
  -3  -5   2  279.97   10.80
  -3  -5   2  266.17   10.80
  -3  -5   2  265.57   10.70
   4   4  -2  179.38    7.60
   4   4  -2  186.08    7.60
   4   4  -2  180.28    7.70
  -4  -4   2  186.78    7.70
  -4  -4   2  182.78    7.50
  -4  -4   2  172.18    7.60
   5   3  -2  465.75   17.50
   5   3  -2  463.25   17.80
   5   3  -2  448.26   17.80
  -5  -3   2  457.25   17.80
  -5  -3   2  484.45   17.40
  -5  -3   2  462.95   17.70
   6   2  -2   54.99    3.80
  -6  -2   2   52.99    3.70
  -6  -2   2   56.39    3.80
   7   1  -2  327.57   12.90
   7   1  -2  333.77   14.50
  -7  -1   2  300.57   12.80
  -7  -1   2  334.77   12.90
   8   0  -2  835.02   34.70
   8   0  -2  816.12   30.90
  -8   0   2  855.91   30.90
  -8   0   2  791.52   34.60
  -8   0   2  777.82   30.80
   9  -1  -2  861.31   35.00
   9  -1  -2  975.10   39.40
  -9   1   2  906.11   35.00
  -9   1   2  960.80   39.30
  10  -2  -2  379.26   17.40
  10  -2  -2  397.36   15.60
 -10   2   2  395.96   15.50
 -10   2   2  367.66   17.40
  11  -3  -2   -0.80    2.60
  11  -3  -2   -0.20    2.00
 -11   3   2    0.80    2.70
 -11   3   2    1.90    2.10
  12  -4  -2  241.58   10.90
  12  -4  -2  226.68    9.50
  12  -4  -2  214.38   10.20
 -12   4   2  244.58   10.50
 -12   4   2  232.08   11.70
  13  -5  -2    4.80    3.20
  13  -5  -2    0.20    0.90
 -13   5   2    1.10    3.40
 -13   5   2    4.40    2.70
  14  -6  -2   18.50    2.80
  14  -6  -2   22.20    4.30
 -14   6   2   18.60    3.60
 -14   6   2   21.10    4.40
  15  -7  -2    2.70    2.70
  15  -7  -2   -9.90    4.00
 -15   7   2    0.50    4.20
 -15   7   2    3.00    3.40
  16  -8  -2  105.39    9.30
  16  -8  -2   99.19    6.70
 -16   8   2   94.79    9.20
  17  -9  -2    3.60    5.10
  17  -9  -2    0.90    3.10
 -17   9   2    2.80    5.00
  18 -10  -2   11.70    5.60
 -18  10   2    4.70    5.30
  19 -11  -2   26.70    6.30
 -19  11   2   12.50    6.00
  20 -12  -2   10.10    6.30
 -20  12   2   10.60    6.20
 -11  17  -1    2.30    5.30
  11 -17   1   -1.40    5.70
 -10  16  -1   -2.60    5.20
 -10  16  -1   -0.30    4.70
  10 -16   1    7.60    6.00
  -9  15  -1   11.30    5.20
  -9  15  -1   16.10    5.50
   9 -15   1   19.30    5.40
  -8  14  -1   65.49    6.30
  -8  14  -1   72.99    6.90
   8 -14   1   78.59    7.10
  -7  13  -1   48.00    5.70
  -7  13  -1   31.80    4.80
   7 -13   1   42.10    5.50
  -6  12  -1   26.60    4.00
  -6  12  -1   34.10    4.90
   6 -12   1   34.30    4.70
  -5  11  -1  319.67   14.50
  -5  11  -1  327.87   14.10
  -5  11  -1  332.87   14.80
   5 -11   1  349.27   14.80
  -4  10  -1    8.00    3.30
  -4  10  -1    9.90    2.40
  -4  10  -1   10.20    2.90
   4 -10   1   10.10    2.80
   4 -10   1   10.10    3.10
  -3   9  -1  717.53   26.90
  -3   9  -1  690.83   27.00
  -3   9  -1  666.53   26.90
   3  -9   1  723.63   26.90
   3  -9   1  653.73   26.70
   3  -9   1  722.63   27.10
  -2   8  -1   23.30    2.80
  -2   8  -1   19.60    2.50
  -2   8  -1   22.90    3.20
   2  -8   1   23.20    3.00
   2  -8   1   23.50    3.20
   2  -8   1   19.50    2.50
  -1   7  -1  684.13   26.10
  -1   7  -1  688.93   26.00
  -1   7  -1  679.73   26.10
   1  -7   1  707.73   26.10
   1  -7   1  656.63   26.00
   1  -7   1  679.13   26.10
   0   6  -1  102.59    5.40
   0   6  -1  103.49    4.80
   0   6  -1  101.19    4.90
   0  -6   1   98.99    5.10
   0  -6   1   79.29    4.60
   1   5  -1  133.19    6.00
   1   5  -1  138.19    6.30
   1   5  -1  140.19    6.00
  -1  -5   1  131.19    6.00
  -1  -5   1  138.19    6.10
  -1  -5   1  141.29    5.90
   2   4  -1  426.16   16.70
   2   4  -1  447.66   16.70
   2   4  -1  422.26   16.60
  -2  -4   1  460.05   16.70
  -2  -4   1  427.86   16.80
  -2  -4   1  435.86   16.70
   3   3  -1 4546.65  166.08
   3   3  -1 4523.05  167.88
   3   3  -1 4455.85  167.38
  -3  -3   1 4457.85  167.78
  -3  -3   1 4631.54  166.18
  -3  -3   1 4542.15  167.88
   4   2  -1   51.49    3.40
   4   2  -1   50.69    3.50
   4   2  -1   61.69    2.90
  -4  -2   1   45.20    3.40
  -4  -2   1   58.99    2.90
  -4  -2   1   49.00    3.50
   5   1  -1    9.40    1.80
   5   1  -1    6.30    1.50
   5   1  -1    9.50    2.10
  -5  -1   1    8.40    1.90
  -5  -1   1    9.10    1.80
   6   0  -1    4.80    2.10
   6   0  -1    0.50    1.90
  -6   0   1    5.70    1.80
  -6   0   1    1.10    1.90
   7  -1  -1   66.09    4.40
   7  -1  -1   71.89    4.90
  -7   1   1   64.79    4.80
  -7   1   1   69.99    4.10
   8  -2  -1  861.41   33.20
   8  -2  -1  882.01   37.00
  -8   2   1  865.51   37.00
  -8   2   1  887.81   33.10
   9  -3  -1   80.09    4.40
   9  -3  -1   75.89    5.60
  -9   3   1   80.49    5.10
  -9   3   1   70.09    5.90
  10  -4  -1   17.40    3.10
  10  -4  -1    8.00    2.00
 -10   4   1   12.70    2.50
 -10   4   1   14.20    3.00
 -10   4   1   13.40    2.60
  11  -5  -1   73.89    6.30
 -11   5   1   67.89    6.00
 -11   5   1   67.09    5.40
 -11   5   1   62.59    5.30
  12  -6  -1  226.28   11.30
  12  -6  -1  241.08   10.10
 -12   6   1  223.68   11.90
 -12   6   1  225.98   10.70
 -12   6   1  229.68   10.70
  13  -7  -1    7.00    3.80
  13  -7  -1   -2.30    2.40
 -13   7   1   -4.20    3.40
 -13   7   1    0.80    2.80
 -13   7   1    0.90    2.90
  14  -8  -1    5.20    3.00
  14  -8  -1    8.80    4.60
 -14   8   1    7.80    3.60
 -14   8   1    4.80    4.00
  15  -9  -1  116.29    9.60
  15  -9  -1   94.59    7.60
 -15   9   1  112.19    8.30
 -15   9   1   86.49    8.80
  16 -10  -1    2.60    5.20
 -16  10   1    7.60    4.40
 -16  10   1   -1.40    4.70
  17 -11  -1   69.79    7.50
 -17  11   1   80.79    7.80
 -17  11   1   77.89    6.90
  18 -12  -1    5.80    5.80
 -18  12   1   -0.40    4.60
 -18  12   1   -1.40    5.30
  19 -13  -1   12.80    6.70
 -19  13   1    6.10    5.90
 -13  17   0   25.40    6.30
  13 -17   0   14.60    7.20
 -12  16   0    4.20    5.50
  12 -16   0    0.10    5.70
 -11  15   0   28.90    5.90
 -11  15   0   28.80    5.80
  11 -15   0   31.10    6.00
 -10  14   0    6.40    4.50
 -10  14   0    6.40    4.80
  10 -14   0    5.60    4.90
  -9  13   0   89.59    7.30
  -9  13   0  101.89    8.70
   9 -13   0  111.59    9.30
  -8  12   0   15.00    3.90
  -8  12   0   14.20    3.80
  -8  12   0   17.70    4.70
   8 -12   0   11.00    4.20
  -7  11   0  136.99    8.10
  -7  11   0  125.39    7.70
  -7  11   0  134.79    8.60
   7 -11   0  152.38    8.70
  -6  10   0   25.10    3.90
  -6  10   0   20.60    3.10
  -6  10   0   21.10    3.40
   6 -10   0   25.50    3.30
   6 -10   0   25.90    3.90
  -5   9   0   66.09    5.10
  -5   9   0   63.39    4.90
  -5   9   0   66.69    5.90
   5  -9   0   70.39    5.70
   5  -9   0   65.89    5.10
  -4   8   0  595.84   22.60
  -4   8   0  575.94   22.60
  -4   8   0  575.94   22.60
   4  -8   0  551.44   22.50
   4  -8   0  607.64   22.70
  -3   7   0   36.20    2.80
  -3   7   0   27.70    2.50
  -3   7   0   33.50    3.10
   3  -7   0   35.60    3.00
   3  -7   0   35.00    3.00
  -2   6   0    8.80    1.80
  -2   6   0    4.90    2.10
  -2   6   0    5.50    1.60
   2  -6   0   -0.10    0.90
   2  -6   0    4.50    1.90
  -1   5   0  281.87   11.60
  -1   5   0  289.67   11.40
  -1   5   0  283.87   11.40
   1  -5   0  310.57   11.60
   1  -5   0  289.57   11.50
   0   4   0 1500.35   57.29
   0   4   0 1607.84   57.69
   0   4   0 1550.54   57.69
   0  -4   0 1554.44   57.69
   1   3   0  222.88    8.50
   1   3   0  211.48    8.30
   1   3   0  213.78    8.40
  -1  -3   0  207.08    8.30
  -1  -3   0  212.08    8.40
   2   2   0  281.57   11.00
   2   2   0  284.47   11.00
   2   2   0  293.17   10.90
  -2  -2   0  295.37   10.90
  -2  -2   0  278.97   11.00
   3   1   0  236.08    9.40
   3   1   0  243.18    9.40
   3   1   0  254.47    9.20
  -3  -1   0  240.68    9.40
  -3  -1   0  233.78    9.40
   4   0   0 9739.13  367.46
   4   0   0 9999.00  410.66
  -4   0   0 9967.60  367.66
  -4   0   0 9980.70  410.76
   5  -1   0  141.69    6.40
   5  -1   0  162.08    6.70
   5  -1   0  129.69    7.10
  -5   1   0  145.59    6.40
  -5   1   0  145.79    7.10
   6  -2   0  117.69    5.60
   6  -2   0  110.79    5.80
   6  -2   0  115.39    5.20
  -6   2   0  106.39    6.10
  -6   2   0  112.79    5.40
  -6   2   0  118.59    5.50
   7  -3   0  236.88    9.90
   7  -3   0  230.78   10.10
   7  -3   0  237.88    9.50
  -7   3   0  231.18    9.70
  -7   3   0  229.38   10.90
  -7   3   0  239.48    9.90
   8  -4   0 1563.84   57.79
   8  -4   0 1538.65   57.79
   8  -4   0 1628.34   56.99
  -8   4   0 1502.65   57.69
  -8   4   0 1587.14   64.39
  -8   4   0 1415.06   57.69
   9  -5   0  333.47   13.80
   9  -5   0  328.17   13.70
  -9   5   0  343.97   13.50
  -9   5   0  323.97   14.90
  -9   5   0  296.87   13.40
  10  -6   0  117.89    7.30
  10  -6   0  128.79    7.80
  10  -6   0  123.89    6.60
 -10   6   0  129.39    7.20
 -10   6   0  123.09    7.70
 -10   6   0  131.29    7.10
  11  -7   0  167.98    8.20
  11  -7   0  172.88    9.60
 -11   7   0  170.78    8.80
 -11   7   0  165.08    9.40
 -11   7   0  152.98    8.60
  12  -8   0    0.40    4.10
  12  -8   0   -0.80    2.80
 -12   8   0   -2.50    3.00
 -12   8   0    0.40    3.00
 -12   8   0   -4.10    3.40
  13  -9   0   63.79    6.10
 -13   9   0   69.69    6.20
 -13   9   0   62.09    6.10
 -13   9   0   58.79    5.80
  14 -10   0    5.60    5.00
 -14  10   0   11.90    4.10
 -14  10   0    3.20    4.30
  15 -11   0   10.90    5.60
 -15  11   0   12.70    4.70
 -15  11   0    4.10    4.60
  16 -12   0   28.70    6.30
 -16  12   0   27.40    5.90
 -16  12   0   36.50    6.00
  17 -13   0   -7.80    5.90
 -17  13   0   -2.00    4.90
 -17  13   0   -0.80    5.20
 -14  16   1   10.80    5.60
  14 -16  -1   -2.00    5.90
 -13  15   1   21.50    5.30
 -13  15   1   13.90    5.30
  13 -15  -1   15.50    6.30
 -12  14   1   60.59    6.40
 -12  14   1   57.39    6.50
  12 -14  -1   67.79    6.70
 -11  13   1    7.20    4.30
 -11  13   1    6.40    4.70
  11 -13  -1   -5.30    4.70
 -10  12   1    8.40    3.70
 -10  12   1    3.70    4.30
 -10  12   1    1.60    3.50
  10 -12  -1    3.00    4.20
  -9  11   1   40.00    4.30
  -9  11   1   46.30    4.60
  -9  11   1   49.30    5.10
   9 -11  -1   45.80    4.90
  -8  10   1  124.29    7.40
  -8  10   1  126.89    8.00
  -8  10   1  129.79    7.40
   8 -10  -1  133.19    7.40
   8 -10  -1  139.49    8.10
  -7   9   1  127.39    6.90
  -7   9   1  125.19    7.00
  -7   9   1  132.59    7.50
   7  -9  -1  138.59    7.60
   7  -9  -1  116.99    6.50
   7  -9  -1  137.99    7.10
  -6   8   1    1.70    2.50
  -6   8   1    0.60    2.20
  -6   8   1    0.20    2.10
   6  -8  -1    0.30    2.50
   6  -8  -1    0.70    1.80
   6  -8  -1   -0.60    2.10
  -5   7   1   42.50    3.00
  -5   7   1   40.70    3.30
  -5   7   1   39.50    3.10
   5  -7  -1   30.50    2.60
   5  -7  -1   33.00    3.00
   5  -7  -1   36.10    3.20
  -4   6   1  684.13   25.30
  -4   6   1  646.94   25.30
  -4   6   1  677.53   25.20
   4  -6  -1  651.23   25.30
  -3   5   1   40.30    2.80
  -3   5   1   41.00    3.10
  -3   5   1   41.50    3.70
   3  -5  -1   43.40    2.80
   3  -5  -1   43.50    3.20
   3  -5  -1   44.10    3.40
  -2   4   1  397.26   15.70
  -2   4   1  416.56   15.60
  -2   4   1  412.96   15.70
   2  -4  -1  411.06   15.70
   2  -4  -1  412.26   15.60
   2  -4  -1  413.36   15.70
  -1   3   1  746.03   26.70
  -1   3   1  702.63   26.70
  -1   3   1  681.03   26.60
   1  -3  -1  727.13   26.70
   1  -3  -1  712.13   26.60
   1  -3  -1  730.53   26.70
   0   2   1  237.58    9.30
   0   2   1  238.98    9.20
   0   2   1  253.47    9.20
   0  -2  -1  245.58    9.20
   0  -2  -1  244.78    9.20
   1   1   1 1025.90   38.60
   1   1   1 1076.69   38.60
  -1  -1  -1 1044.20   38.60
  -1  -1  -1 1020.40   38.60
   2   0   1   -1.30    0.90
   3  -1   1  649.83   27.70
   3  -1   1  667.73   25.00
   3  -1   1  658.33   25.00
  -3   1  -1  683.83   25.00
  -3   1  -1  648.44   24.90
  -3   1  -1  663.33   27.70
   4  -2   1  484.55   18.10
   4  -2   1  444.76   18.00
  -4   2  -1  479.45   18.00
  -4   2  -1  460.05   19.80
  -4   2  -1  466.85   18.00
   5  -3   1 1529.65   55.39
   5  -3   1 1515.45   55.99
   5  -3   1 1498.25   55.99
  -5   3  -1 1522.45   55.99
  -5   3  -1 1476.85   62.39
  -5   3  -1 1455.75   55.99
   6  -4   1  150.18    6.80
   6  -4   1  133.89    7.00
  -6   4  -1  150.08    6.50
  -6   4  -1  130.69    6.90
  -6   4  -1  109.69    6.40
   7  -5   1  690.03   26.20
   7  -5   1  675.13   26.20
  -7   5  -1  662.83   26.00
  -7   5  -1  672.53   28.80
  -7   5  -1  667.63   26.00
   8  -6   1   81.99    5.90
   8  -6   1   75.79    6.30
   8  -6   1   68.69    5.40
  -8   6  -1   71.69    5.50
  -8   6  -1   72.49    5.20
  -8   6  -1   70.69    5.30
   9  -7   1  250.97   11.50
   9  -7   1  243.68   12.00
   9  -7   1  264.47   11.20
  -9   7  -1  264.47   12.10
  -9   7  -1  236.08   12.30
  -9   7  -1  254.87   11.30
  -9   7  -1  250.27   11.40
  10  -8   1    4.10    3.70
  10  -8   1    3.90    2.70
 -10   8  -1    2.50    3.20
 -10   8  -1    5.10    3.00
 -10   8  -1    2.40    2.80
 -10   8  -1    2.80    3.10
  11  -9   1   41.50    5.30
 -11   9  -1   37.40    4.80
 -11   9  -1   35.00    4.60
 -11   9  -1   31.90    4.30
  12 -10   1  107.49    9.80
 -12  10  -1   92.99    8.30
 -12  10  -1  101.99    7.90
 -12  10  -1   96.09    8.20
  13 -11   1   35.40    6.00
 -13  11  -1   41.50    5.60
 -13  11  -1   43.90    5.80
  14 -12   1  -13.10    5.10
 -14  12  -1    3.00    4.50
 -14  12  -1   -9.30    4.30
  15 -13   1    2.60    5.70
 -15  13  -1    0.10    4.80
 -15  13  -1   -2.10    4.80
  16 -14   1   13.70    6.60
 -16  14  -1   10.80    5.50
 -16  14  -1   12.60    5.70
 -16  16   2   19.50    7.00
 -16  16   2   30.90    6.40
 -15  15   2    7.30    5.00
  15 -15  -2   10.60    6.10
 -14  14   2    4.80    4.90
 -14  14   2    1.90    4.50
  14 -14  -2   -5.30    5.30
 -13  13   2    2.10    4.10
 -13  13   2   -2.20    4.40
  13 -13  -2   -0.10    5.10
 -12  12   2  144.49    9.90
 -12  12   2  149.99    9.40
 -12  12   2  167.78   10.00
  12 -12  -2  178.18   10.80
 -11  11   2   61.69    5.10
 -11  11   2   60.09    5.60
 -11  11   2   67.69    5.50
  11 -11  -2   60.09    5.60
 -10  10   2   -4.30    3.30
 -10  10   2   -0.70    2.90
 -10  10   2   -2.50    2.60
  10 -10  -2    6.10    3.50
  10 -10  -2   -1.30    2.60
  -9   9   2   31.30    3.30
  -9   9   2   28.20    3.50
  -9   9   2   30.70    3.80
   9  -9  -2   30.10    3.40
   9  -9  -2   32.80    3.90
  -8   8   2  387.16   15.70
  -8   8   2  381.56   15.70
  -8   8   2  375.86   15.60
   8  -8  -2  387.56   15.60
   8  -8  -2  402.86   15.90
   8  -8  -2  382.16   15.60
  -7   7   2  306.57   12.30
  -7   7   2  294.17   12.40
  -7   7   2  294.07   12.30
   7  -7  -2  301.57   12.30
   7  -7  -2  293.57   12.30
   7  -7  -2  305.97   12.50
  -6   6   2   47.20    4.00
  -6   6   2   39.90    3.50
  -6   6   2   45.60    3.60
   6  -6  -2   39.60    3.10
   6  -6  -2   46.50    3.60
  -5   5   2   84.89    4.20
  -5   5   2   78.69    4.50
  -5   5   2   79.59    4.10
   5  -5  -2   73.39    4.20
   5  -5  -2   82.49    4.40
  -4   4   2  168.38    7.10
  -4   4   2  177.58    7.40
  -4   4   2  173.98    7.10
   4  -4  -2  177.68    7.20
   4  -4  -2  178.58    7.10
   4  -4  -2  167.78    7.30
  -3   3   2 1334.77   49.60
  -3   3   2 1342.97   49.60
  -3   3   2 1301.67   49.30
   3  -3  -2 1320.17   49.30
   3  -3  -2 1388.96   49.60
   3  -3  -2 1347.57   49.60
  -2   2   2  110.69    4.70
  -2   2   2  114.39    4.40
  -2   2   2  110.79    4.40
   2  -2  -2  107.99    4.70
  -1   1   2 1258.97   49.80
   1  -1  -2 1258.07   49.80
   0   0   2   12.20    1.20
   0   0   2   10.70    1.00
   0   0   2    9.10    0.90
   0   0  -2   16.10    1.30
   0   0  -2    9.50    0.90
   0   0  -2   11.60    0.90
   1  -1   2  608.24   25.10
   1  -1   2  635.24   23.40
   1  -1   2  628.84   23.40
  -1   1  -2  621.24   23.40
  -1   1  -2  625.04   25.00
   2  -2   2  101.49    5.30
   2  -2   2  111.19    5.40
  -2   2  -2  109.59    5.30
  -2   2  -2  107.49    5.00
  -2   2  -2  125.89    5.70
   3  -3   2  189.38    8.20
   3  -3   2  188.38    8.20
   3  -3   2  206.38    8.20
  -3   3  -2  185.68    8.10
  -3   3  -2  180.18    8.50
  -3   3  -2  188.38    8.00
   4  -4   2  302.57   12.20
   4  -4   2  293.87   12.00
   4  -4   2  292.57   12.10
  -4   4  -2  301.17   12.70
  -4   4  -2  302.67   12.00
  -4   4  -2  288.87   12.10
   5  -5   2   57.39    4.40
   5  -5   2   34.10    3.40
   5  -5   2   30.50    3.50
  -5   5  -2   43.10    3.60
  -5   5  -2   32.90    2.90
   6  -6   2   30.10    3.20
   6  -6   2   21.80    3.30
   6  -6   2   26.80    3.20
  -6   6  -2   26.20    2.90
  -6   6  -2   17.10    2.90
  -6   6  -2   30.40    3.10
   7  -7   2   22.80    3.30
   7  -7   2   23.00    3.60
   7  -7   2   21.20    3.20
  -7   7  -2   18.40    3.10
  -7   7  -2   22.30    3.00
  -7   7  -2   24.80    3.40
   8  -8   2  253.27   11.50
   8  -8   2  249.18   12.10
  -8   8  -2  243.58   11.60
  -8   8  -2  263.47   11.80
  -8   8  -2  242.78   11.40
   9  -9   2    3.40    4.20
  -9   9  -2    6.90    3.20
  -9   9  -2    4.00    3.60
  10 -10   2   14.40    5.10
 -10  10  -2   15.20    3.70
 -10  10  -2   12.50    4.20
  11 -11   2    8.10    5.40
 -11  11  -2    5.10    4.20
 -11  11  -2    6.30    4.20
  12 -12   2   42.70    6.40
 -12  12  -2   48.10    6.20
 -12  12  -2   44.00    5.60
  13 -13   2    1.70    5.60
 -13  13  -2    9.70    5.10
 -13  13  -2    9.40    4.80
  14 -14   2  -10.30    5.90
 -14  14  -2   -4.10    4.70
 -14  14  -2   -1.00    5.20
 -17  15   3   14.00    5.90
 -17  15   3    7.70    6.20
 -16  14   3   39.70    6.10
 -16  14   3   34.70    5.70
 -16  14   3   42.80    7.30
  16 -14  -3   36.00    6.30
 -15  13   3   14.00    5.80
 -15  13   3    7.90    4.60
 -15  13   3   11.30    4.80
  15 -13  -3   12.90    5.20
 -14  12   3    1.70    4.00
 -14  12   3   -0.20    4.30
  14 -12  -3    0.90    4.70
 -13  11   3   39.40    4.40
 -13  11   3   41.60    5.00
 -13  11   3   37.50    4.70
  13 -11  -3   49.90    5.60
 -12  10   3   26.00    4.00
 -12  10   3   26.20    4.30
 -12  10   3   25.70    3.70
  12 -10  -3   33.60    4.80
  12 -10  -3   22.70    3.60
 -11   9   3   66.79    6.10
 -11   9   3   69.79    6.00
 -11   9   3   69.19    5.70
  11  -9  -3   77.19    7.00
  11  -9  -3   66.59    5.60
 -10   8   3   13.50    2.70
 -10   8   3   14.70    2.90
 -10   8   3    9.90    2.90
  10  -8  -3   18.00    2.80
  10  -8  -3   15.70    3.40
  10  -8  -3    8.70    2.60
  -9   7   3  459.25   17.90
  -9   7   3  460.95   18.10
  -9   7   3  459.65   18.00
   9  -7  -3  442.16   18.00
   9  -7  -3  449.46   17.80
   9  -7  -3  457.45   18.20
  -8   6   3  225.78    8.70
  -8   6   3  187.98    8.60
  -8   6   3  180.28    8.60
   8  -6  -3  192.68    8.80
   8  -6  -3  196.48    8.50
  -7   5   3  124.59    5.70
  -7   5   3  120.69    5.80
  -7   5   3  119.69    5.70
   7  -5  -3  125.49    6.00
   7  -5  -3  117.89    5.70
  -6   4   3  200.78    8.30
  -6   4   3  202.08    8.30
  -6   4   3  202.58    8.40
   6  -4  -3  207.38    8.40
   6  -4  -3  200.08    8.30
   6  -4  -3  212.98    8.30
  -5   3   3 1033.20   38.30
  -5   3   3 1034.40   38.30
  -5   3   3 1012.90   38.10
   5  -3  -3 1078.59   38.30
   5  -3  -3  987.40   38.30
   5  -3  -3 1038.70   38.10
  -4   2   3  859.71   31.70
   4  -2  -3  853.71   31.70
  -2   0   3   -0.70    1.10
  -1  -1   3    5.20    1.20
  -1  -1   3    3.40    1.10
  -1  -1   3    3.90    1.40
   1   1  -3    2.00    1.10
   1   1  -3    0.20    0.80
   1   1  -3    3.30    1.00
   0  -2   3   53.99    3.50
   0  -2   3   49.99    3.90
   0  -2   3   55.89    3.50
   0   2  -3   53.89    3.70
   0   2  -3   49.99    3.30
   0   2  -3   58.19    3.20
   1  -3   3  193.68    8.10
   1  -3   3  176.18    8.80
   1  -3   3  200.88    8.10
  -1   3  -3  197.98    8.00
  -1   3  -3  191.98    8.50
   2  -4   3   60.69    4.10
   2  -4   3   63.99    4.20
   2  -4   3   58.79    4.80
  -2   4  -3   57.99    4.10
  -2   4  -3   61.29    3.90
  -2   4  -3   59.79    3.90
   3  -5   3   54.89    3.70
   3  -5   3   55.69    3.90
   3  -5   3   50.29    4.50
  -3   5  -3   40.60    3.80
  -3   5  -3   58.99    4.10
  -3   5  -3   49.00    4.00
   4  -6   3  345.27   14.80
   4  -6   3  365.26   14.70
   4  -6   3  383.16   14.70
  -4   6  -3  342.77   14.60
  -4   6  -3  354.96   15.20
  -4   6  -3  347.17   14.50
   5  -7   3   48.50    4.00
   5  -7   3   59.79    4.50
   5  -7   3   51.49    4.20
  -5   7  -3   57.09    4.30
  -5   7  -3   51.09    4.00
  -5   7  -3   49.99    4.60
   6  -8   3   33.40    4.60
   6  -8   3   29.90    3.70
   6  -8   3   25.30    3.60
  -6   8  -3   26.50    3.20
  -6   8  -3   28.00    3.50
  -6   8  -3   30.70    3.50
   7  -9   3   -2.20    3.70
  -7   9  -3    2.00    2.60
  -7   9  -3    0.00    3.30
   8 -10   3   81.89    6.70
  -8  10  -3  104.09    7.10
  -8  10  -3   98.79    7.90
   9 -11   3   56.39    6.00
  -9  11  -3   73.99    6.80
  -9  11  -3   75.09    6.60
  10 -12   3   14.20    5.40
 -10  12  -3    5.20    4.10
  11 -13   3    4.60    6.00
 -11  13  -3    5.10    4.90
  12 -14   3    0.00    6.00
 -12  14  -3   -0.30    4.50
 -12  14  -3   -1.70    5.20
  13 -15   3   12.10    6.60
 -13  15  -3    2.50    5.40
 -18  14   4   -3.90    4.80
 -18  14   4   -0.40    6.00
 -17  13   4   47.50    6.00
 -17  13   4   44.60    7.10
 -17  13   4   45.90    5.70
  17 -13  -4   50.59    6.50
 -16  12   4    4.90    4.30
 -16  12   4    5.20    5.40
 -16  12   4   -1.20    4.20
  16 -12  -4    0.80    4.80
 -15  11   4   51.09    5.40
 -15  11   4   38.20    6.50
 -15  11   4   34.60    4.60
 -15  11   4   50.89    5.40
  15 -11  -4   49.50    5.50
 -14  10   4    0.20    3.50
 -14  10   4   -0.80    3.10
 -14  10   4    5.20    5.00
 -14  10   4    2.80    3.60
  14 -10  -4    2.50    3.90
  14 -10  -4   -0.20    3.00
 -13   9   4   93.89    6.70
 -13   9   4   93.29    6.80
 -13   9   4  103.89    7.10
  13  -9  -4   91.59    6.30
  13  -9  -4   97.59    7.70
 -12   8   4   98.39    6.30
 -12   8   4   94.29    6.40
 -12   8   4   88.89    6.30
  12  -8  -4   84.79    5.90
  12  -8  -4   93.19    7.20
 -11   7   4  451.95   18.20
 -11   7   4  459.45   18.40
 -11   7   4  483.25   18.40
  11  -7  -4  459.15   18.10
  11  -7  -4  443.76   18.30
  11  -7  -4  470.55   18.60
 -10   6   4    0.70    2.20
 -10   6   4    1.70    2.00
 -10   6   4    0.30    2.00
  10  -6  -4    0.30    0.90
  10  -6  -4    0.40    2.10
  10  -6  -4    0.50    2.40
  -9   5   4   37.30    2.80
  -9   5   4   36.50    2.80
  -9   5   4   28.80    2.60
   9  -5  -4   30.10    2.50
   9  -5  -4   35.20    3.00
   9  -5  -4   35.70    2.80
  -8   4   4  124.89    5.50
  -8   4   4  118.99    5.50
  -8   4   4  113.29    5.40
   8  -4  -4  113.69    5.30
   8  -4  -4  113.59    5.70
  -7   3   4    5.30    1.50
  -7   3   4    3.10    1.20
  -7   3   4    7.00    2.40
  -7   3   4    3.90    1.50
   7  -3  -4    6.00    1.30
   7  -3  -4    6.90    1.60
   7  -3  -4    5.30    1.40
  -6   2   4  232.78    8.80
  -6   2   4  221.18    8.80
  -6   2   4  243.48   10.60
   6  -2  -4  207.08    8.70
  -5   1   4   58.99    4.50
  -4   0   4 9625.94  403.26
   4   0  -4 9846.01  403.16
  -3  -1   4  387.36   16.90
  -3  -1   4  402.06   15.00
  -3  -1   4  407.76   14.90
   3   1  -4  375.36   16.90
   3   1  -4  396.56   15.00
   3   1  -4  404.56   14.90
  -2  -2   4  110.29    5.10
  -2  -2   4  120.29    5.20
  -2  -2   4  106.59    5.90
   2   2  -4  108.49    5.00
   2   2  -4  115.99    5.00
   2   2  -4  124.79    5.60
  -1  -3   4 1895.11   70.29
  -1  -3   4 1895.91   75.29
  -1  -3   4 1905.91   70.29
   1   3  -4 1894.11   70.29
   1   3  -4 1881.51   75.29
   0  -4   4  631.84   25.90
   0  -4   4  648.94   24.20
   0  -4   4  622.54   24.20
   0   4  -4  644.44   25.80
   0   4  -4  628.24   24.20
   1  -5   4  109.99    5.90
   1  -5   4  116.59    6.10
   1  -5   4  120.19    6.50
   1  -5   4  104.09    6.00
  -1   5  -4  111.19    5.60
  -1   5  -4  116.99    5.90
  -1   5  -4  120.09    5.90
   2  -6   4    5.30    2.40
   2  -6   4    0.10    2.50
   2  -6   4    3.20    2.80
   2  -6   4    3.80    2.50
  -2   6  -4   -0.10    1.90
  -2   6  -4    0.70    2.10
  -2   6  -4    3.80    2.10
   3  -7   4  247.48   10.60
   3  -7   4  241.58   10.40
   3  -7   4  232.28   10.60
  -3   7  -4  241.58   10.20
  -3   7  -4  209.98   10.60
  -3   7  -4  221.98   10.30
   4  -8   4  147.09    7.80
   4  -8   4  122.59    8.00
   4  -8   4  128.79    7.40
  -4   8  -4  126.39    7.00
  -4   8  -4  134.29    7.30
  -4   8  -4  126.49    7.40
   5  -9   4   86.29    6.20
  -5   9  -4   86.09    6.00
  -5   9  -4   78.69    6.80
   6 -10   4   75.29    6.00
  -6  10  -4   80.29    6.30
  -6  10  -4   88.19    6.40
   7 -11   4  127.49    9.90
  -7  11  -4  123.09    8.90
  -7  11  -4  112.89    7.90
   8 -12   4   -4.00    4.50
  -8  12  -4    0.90    4.00
  -8  12  -4   -5.60    3.10
   9 -13   4   92.59    7.70
  -9  13  -4   91.39    7.40
  10 -14   4   -0.20    5.50
 -10  14  -4   -4.80    4.50
  11 -15   4    9.20    6.30
 -11  15  -4    1.90    5.00
 -20  14   5    4.10    6.70
 -19  13   5   42.30    7.70
 -19  13   5   46.00    6.10
 -18  12   5   -4.50    4.20
 -18  12   5   -2.10    4.30
 -18  12   5   -4.00    5.80
  18 -12  -5   -3.10    4.70
 -17  11   5    4.80    4.00
 -17  11   5    5.70    5.60
 -17  11   5    5.90    4.00
  17 -11  -5    7.70    4.60
 -16  10   5   68.19    5.60
 -16  10   5   73.99    7.80
 -16  10   5   65.79    5.70
 -16  10   5   77.09    7.00
  16 -10  -5   62.09    5.00
  16 -10  -5   72.49    6.00
 -15   9   5   18.50    3.90
 -15   9   5   22.50    3.80
 -15   9   5   26.60    5.50
 -15   9   5   23.10    3.70
  15  -9  -5   20.30    3.30
  15  -9  -5   27.20    4.40
 -14   8   5    3.60    4.50
 -14   8   5    2.60    2.80
 -14   8   5   -1.80    2.90
 -14   8   5   -0.70    2.70
  14  -8  -5    0.90    3.40
  14  -8  -5   -4.50    2.30
 -13   7   5   57.59    5.00
 -13   7   5   40.20    3.80
 -13   7   5   64.99    5.40
 -13   7   5   42.50    5.50
  13  -7  -5   80.19    6.00
  13  -7  -5   55.69    4.60
 -12   6   5  846.22   37.70
 -12   6   5  846.32   33.20
 -12   6   5  872.81   32.70
 -12   6   5  921.61   33.20
  12  -6  -5  888.81   33.20
  12  -6  -5  839.92   33.20
 -11   5   5   10.50    2.10
 -11   5   5   11.20    2.30
 -11   5   5   15.90    3.60
 -11   5   5   15.20    2.50
  11  -5  -5   10.90    2.30
  11  -5  -5    7.80    1.90
  11  -5  -5   13.10    2.60
 -10   4   5   -1.90    1.70
 -10   4   5    1.90    1.80
 -10   4   5    1.40    2.70
  10  -4  -5    0.00    2.00
  10  -4  -5   -0.40    1.70
  10  -4  -5    0.50    1.60
  -9   3   5  109.79    6.70
  -9   3   5  105.09    5.00
   9  -3  -5   96.39    5.20
  -8   2   5  526.75   19.70
  -8   2   5  520.75   22.70
   8  -2  -5  529.65   19.70
   8  -2  -5  505.65   19.70
  -7   1   5   78.99    3.90
  -7   1   5   71.29    5.40
  -7   1   5   77.89    4.00
   7  -1  -5   89.09    5.30
  -6   0   5   -4.40    1.20
  -6   0   5   -4.90    1.10
   6   0  -5   -4.60    1.20
   6   0  -5   -1.40    1.00
   6   0  -5   -3.90    1.90
  -5  -1   5 1188.98   46.20
  -5  -1   5 1259.27   46.20
   5   1  -5 1230.08   46.20
   5   1  -5 1320.97   52.09
   5   1  -5 1229.88   46.20
  -4  -2   5 5819.02  211.58
  -4  -2   5 5701.73  211.48
   4   2  -5 5652.53  236.28
   4   2  -5 5684.53  211.18
   4   2  -5 5745.33  211.78
  -3  -3   5  746.43   28.00
  -3  -3   5  756.72   30.20
  -3  -3   5  746.63   28.00
   3   3  -5  726.93   28.00
  -2  -4   5  326.67   12.90
  -2  -4   5  325.07   13.00
  -2  -4   5  335.97   13.90
  -2  -4   5  315.47   13.10
   2   4  -5  324.67   12.90
  -1  -5   5  373.76   16.00
  -1  -5   5  385.46   14.90
  -1  -5   5  366.56   14.90
   1   5  -5  375.86   15.00
   0  -6   5   91.79    5.70
   0  -6   5   88.99    5.70
   0  -6   5   93.39    6.20
   0  -6   5   95.49    5.40
   0   6  -5   89.89    5.10
   0   6  -5   84.09    5.50
   0   6  -5   94.29    5.40
   1  -7   5  377.56   16.30
   1  -7   5  394.06   15.40
   1  -7   5  361.86   15.10
   1  -7   5  355.76   15.30
  -1   7  -5  374.16   15.30
  -1   7  -5  362.56   15.00
  -1   7  -5  372.96   15.90
   2  -8   5   25.40    3.90
   2  -8   5   19.20    3.60
   2  -8   5   16.50    2.80
   2  -8   5   26.40    3.60
  -2   8  -5   25.30    2.90
  -2   8  -5   27.80    3.20
  -2   8  -5   24.80    3.20
   3  -9   5  135.09    8.70
   3  -9   5  144.99    7.90
  -3   9  -5  155.18    7.90
  -3   9  -5  152.48    8.40
   4 -10   5   -1.00    3.50
  -4  10  -5    1.70    3.30
  -4  10  -5    3.30    2.50
   5 -11   5   35.70    4.90
  -5  11  -5   40.80    4.80
  -5  11  -5   36.40    4.10
   6 -12   5   -9.90    4.20
  -6  12  -5   -2.90    4.10
  -6  12  -5   -0.60    2.90
   7 -13   5    3.50    5.50
  -7  13  -5    2.70    4.20
   8 -14   5   70.89    7.40
  -8  14  -5   85.99    8.00
   9 -15   5   17.10    6.10
  -9  15  -5   16.80    5.50
 -21  13   6    8.90    7.00
 -20  12   6   32.20    7.50
 -19  11   6   -1.10    6.20
 -19  11   6   -0.40    4.00
  19 -11  -6    3.80    4.80
 -18  10   6   -1.60    3.80
 -18  10   6    5.70    5.70
  18 -10  -6    1.20    3.00
  18 -10  -6    8.50    4.50
 -17   9   6   -2.50    3.20
 -17   9   6    2.80    3.50
 -17   9   6    1.40    5.20
  17  -9  -6   -1.20    4.10
  17  -9  -6   -2.50    2.50
 -16   8   6  188.68    9.50
 -16   8   6  167.58   12.00
 -16   8   6  169.78    8.80
  16  -8  -6  168.98    8.40
  16  -8  -6  193.68   10.00
 -15   7   6   10.50    3.10
 -15   7   6    3.10    4.50
 -15   7   6    7.90    2.90
  15  -7  -6   13.40    2.60
  15  -7  -6   14.10    3.70
 -14   6   6    8.00    2.70
 -14   6   6    5.60    4.20
  14  -6  -6    8.90    3.20
  14  -6  -6    5.90    2.60
 -13   5   6  174.98   10.70
 -13   5   6  187.18    8.70
  13  -5  -6  183.98    8.80
  13  -5  -6  175.78    8.30
 -12   4   6  340.57   13.40
 -12   4   6  335.97   15.90
  12  -4  -6  320.77   13.30
  12  -4  -6  325.27   13.50
 -11   3   6  223.98   11.60
 -11   3   6  224.18    9.50
  11  -3  -6  223.48    9.60
  11  -3  -6  225.98    9.30
 -10   2   6   44.90    3.50
 -10   2   6   42.50    4.30
 -10   2   6   39.00    3.40
  10  -2  -6   43.90    3.40
  -9   1   6   95.79    5.00
  -9   1   6  112.39    6.70
  -9   1   6  109.19    5.20
   9  -1  -6  115.39    6.40
   9  -1  -6  108.09    5.00
  -8   0   6    3.50    2.50
  -8   0   6    3.50    1.60
  -8   0   6    3.80    1.50
   8   0  -6    3.50    1.40
   8   0  -6    2.30    1.30
   8   0  -6    1.20    1.50
  -7  -1   6  233.38    9.10
  -7  -1   6  227.38   10.80
  -7  -1   6  224.98    9.00
   7   1  -6  232.38    9.00
   7   1  -6  220.78   10.70
   7   1  -6  225.38    9.00
  -6  -2   6  114.39    5.30
  -6  -2   6  117.39    5.30
   6   2  -6  125.59    5.20
   6   2  -6  121.59    5.20
   6   2  -6  102.89    6.40
  -5  -3   6 2226.48   83.89
  -5  -3   6 2310.47   83.89
   5   3  -6 2280.37   83.89
   5   3  -6 2230.98   93.99
  -4  -4   6   58.59    3.90
  -4  -4   6   67.29    4.80
  -4  -4   6   62.79    4.10
   4   4  -6   57.79    3.80
   4   4  -6   51.39    4.00
  -3  -5   6  632.24   23.90
  -3  -5   6  636.64   23.70
  -3  -5   6  601.04   23.80
  -3  -5   6  623.94   25.50
   3   5  -6  609.64   23.70
   3   5  -6  602.84   23.60
  -2  -6   6    7.00    2.40
  -2  -6   6    6.00    2.80
  -2  -6   6    3.30    2.20
  -2  -6   6    2.80    2.60
   2   6  -6    8.80    2.60
  -1  -7   6  329.87   14.60
  -1  -7   6  308.97   13.80
  -1  -7   6  342.67   13.70
   1   7  -6  323.87   13.50
   1   7  -6  346.87   13.90
   0  -8   6  130.59    7.90
   0  -8   6  122.69    7.10
   0  -8   6  122.69    7.50
   0  -8   6  119.59    6.90
   0   8  -6  136.19    7.40
   0   8  -6  125.29    6.60
   1  -9   6   58.09    5.00
   1  -9   6   52.39    4.40
   1  -9   6   41.70    4.50
  -1   9  -6   53.59    4.80
   2 -10   6   -7.50    3.80
   2 -10   6    1.70    3.50
  -2  10  -6   -0.20    3.20
   3 -11   6   82.59    6.40
  -3  11  -6   83.99    6.60
   4 -12   6  112.39    9.70
  -4  12  -6  124.29    9.10
   5 -13   6   -2.10    5.10
  -5  13  -6    0.60    4.60
   6 -14   6    3.60    5.70
  -6  14  -6    0.00    4.40
   7 -15   6    7.80    6.10
  -7  15  -6    6.40    5.00
   8 -16   6   14.90    6.40
  -8  16  -6   32.90    6.80
 -22  12   7    5.80    7.20
 -21  11   7   19.70    7.20
 -20  10   7    6.90    6.60
 -20  10   7   10.70    4.00
  20 -10  -7   18.90    5.00
 -19   9   7   16.10    3.80
 -19   9   7   13.40    6.20
  19  -9  -7   16.80    4.80
 -18   8   7   31.30    4.30
 -18   8   7   28.10    6.40
  18  -8  -7   30.40    4.80
 -17   7   7  105.09   10.20
 -17   7   7  116.09    7.60
  17  -7  -7  108.49    8.10
 -16   6   7   51.39    4.40
 -16   6   7   40.30    5.90
  16  -6  -7   46.30    4.60
 -15   5   7  194.58    9.00
 -15   5   7  169.68   11.40
  15  -5  -7  183.88    9.40
  15  -5  -7  179.48    8.60
 -14   4   7   96.19    5.80
 -14   4   7  106.59    8.30
  14  -4  -7   89.69    6.20
  14  -4  -7   78.79    5.40
 -13   3   7  431.26   19.60
 -13   3   7  417.56   16.60
 -13   3   7  404.16   16.50
  13  -3  -7  389.56   16.30
  13  -3  -7  439.36   16.50
 -12   2   7    7.70    2.10
 -12   2   7    6.60    2.20
 -12   2   7    3.70    3.20
  12  -2  -7    9.00    2.20
  12  -2  -7    3.90    1.60
 -11   1   7   65.69    4.20
 -11   1   7   62.59    4.50
 -11   1   7   70.29    6.30
  11  -1  -7   70.19    5.90
  11  -1  -7   68.99    4.20
 -10   0   7    3.30    3.00
 -10   0   7   -4.90    1.70
 -10   0   7   -0.70    1.80
  10   0  -7   -0.40    1.00
  10   0  -7   -3.20    1.50
  10   0  -7    2.70    2.40
  -9  -1   7   64.59    5.90
  -9  -1   7   72.79    4.10
  -9  -1   7   74.79    4.10
   9   1  -7   71.99    5.50
   9   1  -7   72.09    3.90
  -8  -2   7  370.46   14.30
  -8  -2   7  355.96   16.60
  -8  -2   7  368.96   14.30
   8   2  -7  369.96   14.20
  -7  -3   7   19.20    2.10
  -7  -3   7   17.00    2.10
   7   3  -7   20.00    2.00
   7   3  -7   17.50    1.90
   7   3  -7   14.20    2.70
  -6  -4   7  160.18    7.40
  -6  -4   7  172.78    7.30
  -6  -4   7  165.68    7.80
   6   4  -7  169.18    7.30
   6   4  -7  154.98    8.30
   6   4  -7  158.28    7.10
  -5  -5   7  444.16   17.20
  -5  -5   7  435.16   17.30
  -5  -5   7  415.06   17.40
   5   5  -7  448.76   17.30
   5   5  -7  442.36   17.10
  -4  -6   7 1045.80   40.50
  -4  -6   7 1126.49   40.60
  -4  -6   7 1037.50   40.50
  -4  -6   7 1071.39   43.40
   4   6  -7 1062.89   40.40
   4   6  -7 1080.19   40.50
  -3  -7   7    4.50    2.60
  -3  -7   7    4.90    2.80
  -3  -7   7    4.40    3.00
  -3  -7   7   -1.80    2.20
   3   7  -7    1.50    2.20
  -2  -8   7   16.60    3.40
  -2  -8   7   14.00    3.20
  -2  -8   7   12.70    3.20
  -2  -8   7   20.90    3.20
   2   8  -7   17.30    3.30
  -1  -9   7   -2.60    3.30
  -1  -9   7   -4.10    3.50
  -1  -9   7    2.40    2.60
   1   9  -7   -1.30    3.00
   0 -10   7  212.38   11.20
   0 -10   7  225.18   11.60
   0  10  -7  211.08   11.00
   1 -11   7   -3.60    4.10
   1 -11   7    0.60    4.00
  -1  11  -7   -6.10    3.70
   2 -12   7    8.90    4.60
  -2  12  -7    4.00    3.90
   3 -13   7   43.20    6.40
  -3  13  -7   39.20    5.50
   4 -14   7   32.60    5.80
  -4  14  -7   35.60    5.70
   5 -15   7   41.00    6.40
  -5  15  -7   36.70    5.90
   6 -16   7   -2.90    5.90
  -6  16  -7   -2.70    4.80
 -23  11   8   -8.00    7.00
 -22  10   8   10.90    7.10
 -21   9   8   23.80    7.40
 -20   8   8   -1.20    6.40
  20  -8  -8   12.20    4.60
 -19   7   8    5.30    3.60
 -19   7   8    1.30    6.00
  19  -7  -8    5.50    4.30
 -18   6   8   13.00    3.70
 -18   6   8    3.90    5.80
  18  -6  -8    9.50    3.80
 -17   5   8  322.67   13.60
 -17   5   8  305.97   16.50
  17  -5  -8  304.27   13.70
 -16   4   8  264.27   11.10
 -16   4   8  239.78   11.30
 -16   4   8  233.18   13.90
  16  -4  -8  264.87   11.30
  16  -4  -8  237.98   10.90
 -15   3   8  204.28    9.20
 -15   3   8  180.48    9.00
 -15   3   8  199.28   11.50
  15  -3  -8  199.68    9.00
  15  -3  -8  193.18    8.80
 -14   2   8    8.60    3.80
 -14   2   8   13.20    2.60
 -14   2   8    8.70    2.60
  14  -2  -8    5.50    1.90
  14  -2  -8   10.10    2.40
 -13   1   8   15.40    2.50
 -13   1   8   17.10    4.10
 -13   1   8   12.40    2.30
  13  -1  -8   10.90    3.30
  13  -1  -8   11.60    2.20
 -12   0   8  337.77   13.50
 -12   0   8  334.57   13.60
 -12   0   8  351.66   16.40
  12   0  -8  331.97   15.90
  12   0  -8  341.27   13.40
 -11  -1   8   41.60    3.00
 -11  -1   8   47.00    4.80
 -11  -1   8   37.10    3.00
  11   1  -8   54.59    4.70
  11   1  -8   45.20    3.60
  11   1  -8   39.80    3.00
 -10  -2   8    5.80    2.20
 -10  -2   8    1.80    2.00
 -10  -2   8    7.30    3.10
  10   2  -8    2.50    1.90
  10   2  -8   14.20    3.30
  10   2  -8    6.40    1.80
  -9  -3   8   13.30    2.30
  -9  -3   8   12.10    2.20
   9   3  -8   11.60    2.00
   9   3  -8   19.40    3.40
   9   3  -8   18.30    2.10
  -8  -4   8  298.17   12.40
  -8  -4   8  311.87   12.30
  -8  -4   8  292.87   12.30
   8   4  -8  292.97   14.20
   8   4  -8  301.77   12.20
   8   4  -8  302.77   12.10
  -7  -5   8   10.90    2.80
  -7  -5   8   20.40    2.40
  -7  -5   8   20.20    2.60
   7   5  -8   22.40    2.30
   7   5  -8    5.00    2.80
   7   5  -8   15.60    2.30
  -6  -6   8  329.17   13.30
  -6  -6   8  326.17   13.60
  -6  -6   8  325.47   13.60
   6   6  -8  330.07   13.40
   6   6  -8  304.57   13.10
  -5  -7   8  128.59    7.50
  -5  -7   8  148.59    8.20
  -5  -7   8  147.49    7.70
  -5  -7   8  133.19    7.00
   5   7  -8  147.19    7.40
   5   7  -8  123.89    6.80
  -4  -8   8   37.10    4.00
  -4  -8   8   46.70    4.50
  -4  -8   8   46.80    3.90
   4   8  -8   47.20    4.20
  -3  -9   8   56.39    5.10
  -3  -9   8   48.50    4.30
  -3  -9   8   54.69    4.80
   3   9  -8   64.09    5.10
  -2 -10   8   15.20    4.00
  -2 -10   8   18.30    4.10
   2  10  -8   15.50    3.90
  -1 -11   8  123.79    9.20
  -1 -11   8  119.39    9.00
   1  11  -8  120.79    8.80
   0 -12   8    5.70    4.30
   0 -12   8    3.90    4.40
   0  12  -8   -1.70    4.00
   1 -13   8   72.79    6.70
  -1  13  -8   88.89    7.20
   2 -14   8    7.50    5.60
  -2  14  -8    4.30    4.80
   3 -15   8   15.60    5.60
  -3  15  -8   16.70    5.30
   4 -16   8    1.90    6.20
  -4  16  -8    7.90    5.30
 -24  10   9    8.20    7.70
 -23   9   9   15.50    7.90
 -22   8   9    0.10    6.60
 -21   7   9   18.50    6.70
  21  -7  -9   12.70    4.40
 -20   6   9   40.20    6.80
 -20   6   9   36.10    4.80
  20  -6  -9   27.50    4.50
 -19   5   9   32.80    4.30
 -19   5   9   25.40    6.40
 -19   5   9   25.60    4.30
  19  -5  -9   25.20    3.90
 -18   4   9   12.20    3.40
 -18   4   9   10.70    3.20
 -18   4   9    0.50    4.80
  18  -4  -9    9.10    3.20
 -17   3   9   26.00    3.60
 -17   3   9   25.00    3.50
 -17   3   9   15.40    5.10
  17  -3  -9   29.30    3.50
 -16   2   9  366.66   17.60
 -16   2   9  334.97   14.40
 -16   2   9  350.06   14.40
  16  -2  -9  326.87   14.10
  16  -2  -9  358.96   14.30
 -15   1   9   27.60    3.20
 -15   1   9   41.80    5.20
 -15   1   9   29.60    3.20
  15  -1  -9   31.50    3.00
 -14   0   9    5.70    3.80
 -14   0   9    4.90    2.50
  14   0  -9    0.20    3.20
 -13  -1   9   38.10    3.20
 -13  -1   9   44.90    3.40
 -13  -1   9   40.00    5.00
  13   1  -9   41.20    3.00
  13   1  -9   35.50    3.00
  13   1  -9   35.90    4.40
 -12  -2   9  179.28    8.30
 -12  -2   9  175.58   10.30
 -12  -2   9  181.78    8.20
  12   2  -9  193.88    8.30
  12   2  -9  171.98    7.90
  12   2  -9  192.38   10.10
 -11  -3   9  261.27   10.50
 -11  -3   9  223.58   10.30
 -11  -3   9  241.58   10.50
  11   3  -9  244.68   10.20
  11   3  -9  245.78   12.20
  11   3  -9  247.88   10.20
 -10  -4   9   23.80    2.70
 -10  -4   9   23.70    2.90
 -10  -4   9   22.20    2.90
  10   4  -9   22.50    3.80
  10   4  -9   24.90    2.60
  10   4  -9   22.30    2.50
  -9  -5   9   45.90    3.50
  -9  -5   9   39.40    3.60
  -9  -5   9   48.30    3.80
   9   5  -9   43.60    4.50
   9   5  -9   38.60    3.10
   9   5  -9   42.30    3.40
  -8  -6   9  109.09    6.60
  -8  -6   9  105.29    6.10
  -8  -6   9  113.49    6.50
   8   6  -9   96.59    7.00
   8   6  -9  117.09    6.30
   8   6  -9  106.29    5.90
  -7  -7   9  349.67   15.80
  -7  -7   9  355.56   14.70
  -7  -7   9  353.66   14.40
  -7  -7   9  322.47   14.60
   7   7  -9  347.47   14.50
  -6  -8   9   -0.20    3.10
  -6  -8   9   -4.00    2.50
  -6  -8   9   -1.40    3.50
   6   8  -9    2.60    2.70
  -5  -9   9   16.30    4.00
  -5  -9   9   18.00    3.20
  -5  -9   9   21.60    4.20
   5   9  -9   25.30    3.60
  -4 -10   9    1.10    3.00
  -4 -10   9   -0.50    3.90
  -4 -10   9   -9.10    3.80
   4  10  -9   -1.50    3.30
  -3 -11   9   64.29    5.80
  -3 -11   9   52.39    5.70
   3  11  -9   62.29    5.80
  -2 -12   9    0.20    4.40
  -2 -12   9   -5.20    4.60
   2  12  -9    0.80    3.90
  -1 -13   9    0.60    4.80
  -1 -13   9    9.90    4.90
   1  13  -9    3.90    4.40
   0 -14   9   24.90    5.70
   0  14  -9   25.50    5.60
   1 -15   9   15.20    6.40
  -1  15  -9   13.60    5.20
   2 -16   9    1.70    5.60
  -2  16  -9   -6.20    4.90
 -25   9  10    7.10    5.30
 -25   9  10   -1.60    8.00
 -24   8  10   21.30    7.80
 -24   8  10   27.10    5.60
 -23   7  10    0.60    6.90
 -23   7  10    1.70    4.50
 -22   6  10    1.60    4.10
 -22   6  10    1.20    6.40
  22  -6 -10    1.20    4.10
 -21   5  10    1.90    6.20
 -21   5  10   -4.10    3.70
 -21   5  10   -2.20    3.70
  21  -5 -10    4.60    3.70
 -20   4  10   75.29    6.70
 -20   4  10   67.09    5.60
 -20   4  10   75.69    8.50
  20  -4 -10   75.29    6.80
 -19   3  10   -2.20    5.60
 -19   3  10   -4.10    3.40
 -19   3  10   -4.50    3.50
  19  -3 -10   -2.30    3.10
 -18   2  10    2.70    3.10
 -18   2  10   -2.60    2.80
 -18   2  10    1.10    5.10
  18  -2 -10    0.90    2.90
 -17   1  10   68.19    7.00
 -17   1  10   67.69    5.70
 -17   1  10   60.99    4.60
  17  -1 -10   73.79    5.50
 -16   0  10   46.80    6.20
 -16   0  10   45.00    4.00
 -16   0  10   40.70    3.90
  16   0 -10   58.49    4.80
 -15  -1  10   50.39    4.10
 -15  -1  10   57.59    6.20
 -15  -1  10   60.39    5.10
  15   1 -10   71.09    4.80
 -14  -2  10    3.20    2.00
 -14  -2  10    5.00    4.10
 -14  -2  10    4.60    2.70
 -14  -2  10    1.50    2.40
  14   2 -10    5.50    2.20
  14   2 -10    1.00    2.30
  14   2 -10    6.80    3.40
 -13  -3  10  150.18    7.30
 -13  -3  10  139.99    7.10
 -13  -3  10  147.39    7.50
  13   3 -10  155.08    7.30
  13   3 -10  147.69    9.10
  13   3 -10  148.99    7.00
 -12  -4  10   14.00    2.90
 -12  -4  10   22.10    2.90
 -12  -4  10   13.20    2.70
  12   4 -10   15.40    2.50
  12   4 -10   16.60    3.70
  12   4 -10   16.20    2.50
 -11  -5  10   38.70    3.70
 -11  -5  10   40.10    3.40
 -11  -5  10   36.20    3.60
  11   5 -10   33.60    4.40
  11   5 -10   33.90    3.10
  11   5 -10   37.00    3.20
 -10  -6  10   13.10    3.10
 -10  -6  10   16.00    2.80
 -10  -6  10   18.10    3.10
  10   6 -10   17.70    3.80
  10   6 -10   14.70    2.70
  -9  -7  10  134.29    7.20
  -9  -7  10  134.69    7.60
  -9  -7  10  121.49    7.80
   9   7 -10  129.69    7.40
   9   7 -10  122.79    8.30
  -8  -8  10  111.79    7.90
  -8  -8  10  123.69    7.20
  -8  -8  10  117.29    8.60
   8   8 -10  129.09    7.50
  -7  -9  10   83.59    8.00
  -7  -9  10   80.09    6.50
  -7  -9  10   95.89    7.50
   7   9 -10   83.69    7.10
  -6 -10  10   45.30    5.10
  -6 -10  10   23.70    4.40
  -6 -10  10   27.40    3.80
   6  10 -10   32.50    4.60
  -5 -11  10   19.50    4.70
  -5 -11  10   21.70    4.90
   5  11 -10   20.40    4.20
  -4 -12  10   73.09    6.90
  -4 -12  10   74.79    6.60
   4  12 -10   76.39    6.60
  -3 -13  10   11.50    5.00
  -3 -13  10   13.80    5.00
   3  13 -10   10.50    4.70
  -2 -14  10    3.50    5.40
  -2 -14  10    7.20    5.10
   2  14 -10    3.10    5.00
  -1 -15  10    4.80    5.30
  -1 -15  10   -4.60    5.30
   1  15 -10    2.30    4.80
   0 -16  10   32.50    6.50
   0  16 -10   22.80    6.20
 -26   8  11   15.20    5.20
 -26   8  11    7.00    8.30
 -25   7  11   17.50    5.10
 -25   7  11   11.50    7.80
 -24   6  11   40.20    8.90
 -24   6  11   40.10    5.60
 -23   5  11    4.30    4.20
 -23   5  11  -11.10    6.70
 -22   4  11    1.90    4.00
 -22   4  11    0.30    6.50
  22  -4 -11   -1.60    3.40
 -21   3  11   47.10    5.00
 -21   3  11   51.99    5.00
 -21   3  11   67.09    8.30
  21  -3 -11   48.40    4.60
 -20   2  11   17.40    6.30
 -20   2  11   15.80    3.90
 -20   2  11   10.60    3.60
  20  -2 -11   16.00    3.50
 -19   1  11   88.39    8.40
 -19   1  11   66.19    5.20
 -19   1  11   71.79    6.60
  19  -1 -11   66.39    6.10
 -18   0  11   -6.30    3.20
 -18   0  11   -4.50    5.20
 -18   0  11   -5.70    3.20
  18   0 -11   -1.90    2.70
 -17  -1  11  244.48   11.10
 -17  -1  11  250.47   14.70
 -17  -1  11  228.38   11.10
  17   1 -11  246.08   10.70
 -16  -2  11   -2.50    2.70
 -16  -2  11   -3.50    3.00
  16   2 -11   -0.40    2.30
 -15  -3  11  118.49    6.50
 -15  -3  11  124.89    7.40
 -15  -3  11  141.39    7.20
  15   3 -11  130.19    6.70
 -14  -4  11    3.40    2.70
 -14  -4  11   -4.00    3.10
 -14  -4  11    5.20    2.50
  14   4 -11    2.90    2.30
 -13  -5  11   60.39    4.70
 -13  -5  11   58.89    5.40
 -13  -5  11   62.99    5.10
  13   5 -11   58.39    5.00
  13   5 -11   50.89    5.50
 -12  -6  11  124.29    7.80
 -12  -6  11  126.19    7.20
 -12  -6  11  125.49    7.10
  12   6 -11  128.69    8.80
  12   6 -11  122.19    7.00
 -11  -7  11   15.40    3.20
 -11  -7  11   14.80    3.70
 -11  -7  11   18.90    3.20
  11   7 -11   12.60    4.00
  11   7 -11   21.50    3.30
 -10  -8  11   35.70    4.00
 -10  -8  11   43.10    4.70
  10   8 -11   36.40    5.00
  10   8 -11   42.90    4.20
  -9  -9  11   -3.90    3.80
  -9  -9  11    0.60    3.00
  -9  -9  11    0.10    4.30
   9   9 -11   -5.40    4.00
   9   9 -11    4.10    3.20
  -8 -10  11   56.29    5.60
  -8 -10  11   49.60    4.80
  -8 -10  11   47.10    5.90
   8  10 -11   61.19    5.50
  -7 -11  11   32.40    5.00
  -7 -11  11   36.90    5.40
   7  11 -11   32.70    4.90
  -6 -12  11   14.10    4.80
  -6 -12  11   10.40    4.90
   6  12 -11    1.50    4.00
  -5 -13  11   -0.10    4.70
  -5 -13  11   -3.80    4.60
   5  13 -11   -3.60    4.40
  -4 -14  11   30.30    5.90
  -4 -14  11   33.10    6.30
   4  14 -11   30.00    5.70
  -3 -15  11   -5.90    6.00
  -3 -15  11    3.50    5.40
   3  15 -11   -1.50    4.70
  -2 -16  11   10.30    6.40
   2  16 -11   -3.00    5.40
 -27   7  12   12.60    5.30
 -27   7  12   16.20    8.90
 -26   6  12   12.80    8.60
 -26   6  12    7.60    5.00
 -25   5  12   30.20    5.30
 -25   5  12   32.50    8.70
 -24   4  12    1.20    4.30
 -24   4  12    5.70    8.20
 -23   3  12   23.00    4.60
 -23   3  12   18.20    7.60
 -22   2  12    4.80    4.00
 -22   2  12    3.90    6.70
  22  -2 -12    5.30    3.20
 -21   1  12   16.30    3.90
 -21   1  12   18.00    6.70
 -21   1  12   18.40    4.20
  21  -1 -12   19.90    3.50
 -20   0  12  141.09    8.50
 -20   0  12  150.18   12.60
 -20   0  12  137.99    8.70
  20   0 -12  141.59    8.00
 -19  -1  12   19.80    4.00
 -19  -1  12   29.30    6.60
 -19  -1  12   21.10    3.70
  19   1 -12   20.10    3.30
 -18  -2  12   10.60    3.40
 -18  -2  12   11.50    3.70
  18   2 -12    9.20    2.70
 -17  -3  12   33.30    4.20
 -17  -3  12   31.30    3.80
  17   3 -12   23.50    3.20
 -16  -4  12   83.89    5.70
 -16  -4  12  102.09    6.50
 -16  -4  12   91.09    7.40
  16   4 -12   92.89    6.00
 -15  -5  12   -3.10    2.50
 -15  -5  12   -5.80    3.30
 -15  -5  12    5.90    3.00
  15   5 -12   -0.60    2.50
 -14  -6  12    1.10    3.20
 -14  -6  12    0.90    2.70
 -14  -6  12    7.40    3.70
  14   6 -12    2.90    2.70
 -13  -7  12    4.90    3.10
 -13  -7  12    8.40    3.40
 -13  -7  12   -2.20    3.70
  13   7 -12    7.30    3.00
 -12  -8  12  119.69    8.60
 -12  -8  12  112.89    7.60
  12   8 -12  120.79    7.80
 -11  -9  12   -2.20    4.10
 -11  -9  12    5.00    3.30
  11   9 -12   -2.20    3.20
 -10 -10  12    0.00    3.40
 -10 -10  12    2.50    4.80
 -10 -10  12   -0.30    4.20
  10  10 -12    5.10    3.60
  -9 -11  12    3.00    4.50
  -9 -11  12    7.50    5.00
   9  11 -12    6.50    4.20
  -8 -12  12   25.60    5.70
  -8 -12  12   28.40    5.60
   8  12 -12   20.90    4.80
  -7 -13  12   19.80    5.70
  -7 -13  12   14.60    5.20
   7  13 -12   12.80    4.90
  -6 -14  12    2.30    5.10
  -6 -14  12  -10.70    4.90
   6  14 -12   -0.90    4.90
  -5 -15  12   11.80    5.80
  -5 -15  12   -1.80    5.60
   5  15 -12    2.50    5.20
  -4 -16  12   -1.30    5.80
   4  16 -12   -1.10    5.20
 -27   5  13   12.90    5.00
 -27   5  13    8.50    9.50
 -26   4  13    2.70    4.70
 -26   4  13   -4.10    8.20
 -25   3  13   12.80    4.60
 -25   3  13    2.90    8.10
 -24   2  13    5.60    7.20
 -24   2  13   -0.10    4.20
 -23   1  13    5.10    7.20
 -23   1  13   -1.80    4.10
 -22   0  13    5.10    4.10
 -22   0  13   -3.20    6.50
  22   0 -13   -1.30    3.10
 -21  -1  13    1.10    3.60
 -21  -1  13   -5.60    3.90
 -21  -1  13    1.50    6.10
  21   1 -13   -5.70    2.70
 -20  -2  13   81.19    6.90
 -20  -2  13   70.19    5.70
  20   2 -13   77.29    5.80
 -19  -3  13    7.80    4.00
 -19  -3  13    4.00    3.30
  19   3 -13    2.90    2.70
 -18  -4  13    0.90    3.20
 -18  -4  13    0.50    3.90
  18   4 -13   -1.60    2.60
 -17  -5  13    0.20    3.80
 -17  -5  13    3.70    3.30
 -17  -5  13    6.20    2.90
  17   5 -13    4.60    2.90
 -16  -6  13   23.60    3.50
 -16  -6  13   30.80    4.70
 -16  -6  13   32.00    4.00
  16   6 -13   21.50    3.50
 -15  -7  13   -2.30    4.00
 -15  -7  13    1.80    3.50
  15   7 -13   -0.60    2.90
 -14  -8  13   -0.50    4.20
 -14  -8  13    4.10    3.50
  14   8 -13   -0.50    3.10
 -13  -9  13   62.29    5.70
 -13  -9  13   64.89    6.10
  13   9 -13   70.49    5.60
 -12 -10  13   12.00    5.30
 -12 -10  13    5.00    4.70
  12  10 -13    2.10    3.50
 -11 -11  13   85.59    6.90
 -11 -11  13   73.59    7.20
  11  11 -13   62.09    5.90
 -10 -12  13    6.60    5.30
 -10 -12  13    6.40    5.30
  10  12 -13    2.90    4.20
  -9 -13  13   17.60    5.60
  -9 -13  13   10.20    5.70
   9  13 -13    9.50    4.70
  -8 -14  13   -1.10    5.30
  -8 -14  13   -6.30    5.20
   8  14 -13   -2.70    4.70
  -7 -15  13    8.70    6.30
  -7 -15  13   20.40    5.90
   7  15 -13   13.70    5.30
 -28   4  14   33.70    9.70
 -28   4  14   33.50    5.70
 -27   3  14    5.70    4.80
 -27   3  14   -5.10    7.90
 -26   2  14   -2.30    4.60
 -26   2  14    3.80    7.90
 -25   1  14    2.30    4.50
 -25   1  14    3.70    7.60
 -24   0  14   60.89    9.30
 -24   0  14   50.69    5.60
 -23  -1  14   -8.20    4.30
 -22  -2  14    1.80    4.40
 -21  -3  14    9.10    4.40
  21   3 -14    4.90    3.00
 -20  -4  14   17.30    4.60
  20   4 -14   16.10    3.30
 -19  -5  14   -1.40    4.20
 -19  -5  14   -2.50    2.70
  19   5 -14    2.70    3.00
 -18  -6  14   -0.30    3.50
 -18  -6  14   -0.90    2.90
 -18  -6  14   -1.90    4.20
  18   6 -14   -1.00    2.90
 -17  -7  14   21.20    4.90
 -17  -7  14   27.30    4.40
  17   7 -14   24.70    3.80
 -16  -8  14    7.60    4.60
 -16  -8  14    5.50    4.20
  16   8 -14    1.40    3.30
 -15  -9  14   26.00    5.20
  15   9 -14   18.00    4.10
 -14 -10  14    5.00    4.90
  14  10 -14    4.50    3.80
 -13 -11  14   29.20    5.70
 -13 -11  14   19.60    6.00
  13  11 -14   22.90    4.70
 -12 -12  14   13.70    6.00
 -12 -12  14   14.90    5.70
  12  12 -14    5.90    4.60
 -11 -13  14   13.00    5.70
 -11 -13  14   10.90    5.80
  11  13 -14    1.90    4.80
 -10 -14  14    3.70    5.70
 -10 -14  14    2.70    5.80
  10  14 -14   -3.00    4.90
  -9 -15  14   -1.40    5.80
  -9 -15  14   -4.30    5.60
   9  15 -14   -2.00    5.20
 -28   2  15   13.60    5.30
 -28   2  15   14.40    9.30
 -27   1  15    3.30    8.40
 -27   1  15   -1.70    4.80
 -26   0  15   -4.30    4.60
 -25  -1  15   14.40    5.00
 -24  -2  15    2.50    4.60
 -23  -3  15   10.60    4.70
 -22  -4  15   -3.90    4.40
 -21  -5  15   31.20    5.30
 -20  -6  15   -0.90    4.70
 -19  -7  15   15.40    5.10
  19   7 -15   12.70    3.70
 -18  -8  15   -7.20    4.60
  18   8 -15   -4.50    3.20
 -17  -9  15   13.30    5.20
  17   9 -15    8.80    3.90
 -16 -10  15   22.40    5.60
  16  10 -15   21.00    4.50
 -15 -11  15   12.50    5.80
 -15 -11  15    8.10    5.90
  15  11 -15    6.40    4.20
 -14 -12  15    1.70    5.80
 -14 -12  15    2.30    5.90
  14  12 -15   -5.10    4.30
 -13 -13  15   -1.30    6.00
 -13 -13  15   11.30    6.00
  13  13 -15   -1.00    4.80
 -12 -14  15   14.90    6.40
 -12 -14  15   11.50    6.00
  12  14 -15    6.20    5.40
 -28   0  16   -8.10    4.90
 -27  -1  16   12.30    5.30
 -26  -2  16    4.60    5.00
 -25  -3  16   -4.50    4.70
 -24  -4  16   19.50    5.10
 -23  -5  16   13.50    5.10
 -22  -6  16   -5.40    4.90
 -21  -7  16    7.70    5.30
 -20  -8  16   35.30    5.90
 -19  -9  16   11.30    5.50
 -18 -10  16    3.00    5.40
 -17 -11  16   -0.60    5.80
 -16 -12  16   15.00    6.30
 -16 -12  16   21.60    6.90
 -15 -13  16  -12.00    5.80
 -15 -13  16   -2.90    6.40
 -27  -3  17   -0.20    5.20
 -26  -4  17   -6.90    5.00
 -25  -5  17    4.00    5.30
 -24  -6  17   17.60    5.70
 -23  -7  17   -0.30    5.40
 -22  -8  17    2.70    5.30
 -21  -9  17   -3.50    5.40
 -20 -10  17    4.20    5.80
 -19 -11  17   -2.30    5.90
 -22 -12  14    5.20    6.20
 -23 -11  14    1.20    5.80
 -24 -10  14    1.10    5.80
 -25  -9  14   -1.50    5.80
 -26  -8  14    6.70    5.80
  17  15 -13    0.00    5.00
 -17 -15  13    8.10    6.40
  18  14 -13    9.70    4.90
 -18 -14  13   24.30    6.60
  19  13 -13   -6.30    4.50
 -19 -13  13  -10.60    5.40
  20  12 -13   -2.80    4.40
 -20 -12  13    1.10    5.60
  21  11 -13   -2.30    4.40
 -21 -11  13    0.80    5.60
  22  10 -13   24.20    5.10
 -22 -10  13   30.90    6.30
  23   9 -13   -1.00    4.30
 -23  -9  13    1.10    5.50
 -24  -8  13   -2.00    5.10
 -25  -7  13   -5.50    5.20
 -26  -6  13   19.60    5.80
 -27  -5  13   10.70    5.70
 -28  -4  13    2.70    5.50
  14  16 -12   14.90    5.60
 -14 -16  12    3.90    6.80
 -14 -16  12    8.40    6.00
  15  15 -12    2.60    5.10
 -15 -15  12   -2.90    5.70
  16  14 -12    2.70    4.50
 -16 -14  12    5.70    5.90
  17  13 -12   -5.30    4.00
 -17 -13  12    8.20    5.90
  18  12 -12   18.50    5.10
 -18 -12  12   24.70    6.30
  19  11 -12   32.60    5.30
 -19 -11  12   24.30    5.90
  20  10 -12   -6.60    4.00
 -20 -10  12   -6.60    5.00
  21   9 -12   44.50    5.50
 -21  -9  12   31.90    6.10
  22   8 -12   18.00    4.50
 -22  -8  12   12.80    5.30
  23   7 -12   26.90    4.70
 -23  -7  12   29.80    6.00
  24   6 -12   -0.20    4.10
 -24  -6  12   -0.10    5.00
  25   5 -12   20.00    4.90
 -25  -5  12   31.80    5.80
 -26  -4  12    3.10    5.20
 -27  -3  12   43.40    6.30
 -28  -2  12   -5.40    5.30
 -29  -1  12   -2.70    5.40
  11  17 -11   -4.50    5.00
 -11 -17  11    4.30    6.30
  12  16 -11   -4.10    4.90
 -12 -16  11    2.00    5.20
 -12 -16  11  -12.70    5.70
  13  15 -11    8.00    4.80
 -13 -15  11   12.80    5.80
  14  14 -11    0.60    4.50
 -14 -14  11    3.20    5.30
  15  13 -11   10.20    4.40
 -15 -13  11   12.60    5.20
  16  12 -11   10.20    4.20
 -16 -12  11   22.40    6.00
  17  11 -11   30.80    5.00
 -17 -11  11   25.80    5.60
  18  10 -11   16.70    4.40
 -18 -10  11   22.00    5.40
  19   9 -11   79.69    6.60
 -19  -9  11   86.99    7.20
  20   8 -11    6.00    3.90
 -20  -8  11    1.40    4.70
  21   7 -11   23.20    4.60
 -21  -7  11   15.10    5.30
  22   6 -11   10.50    4.20
 -22  -6  11    9.00    4.90
  23   5 -11   -1.70    4.00
 -23  -5  11   -0.60    4.60
  24   4 -11    5.20    4.30
 -24  -4  11   11.30    4.90
  25   3 -11   29.30    5.10
 -25  -3  11   31.30    5.60
  26   2 -11   77.29    7.50
 -26  -2  11   86.29    7.30
 -27  -1  11   14.00    5.40
 -28   0  11   -3.10    5.00
 -29   1  11    1.90    5.40
   9  17 -10    3.30    5.10
  -9 -17  10    5.30    6.10
  10  16 -10   -5.30    4.70
 -10 -16  10   -1.20    4.70
 -10 -16  10   -3.10    5.80
  11  15 -10   13.20    4.80
 -11 -15  10    9.70    5.60
 -11 -15  10   22.90    5.50
  12  14 -10    4.80    4.60
 -12 -14  10   -2.90    5.10
  13  13 -10   58.29    6.20
 -13 -13  10   55.99    6.50
  14  12 -10   20.70    4.40
 -14 -12  10   29.80    5.80
  15  11 -10   13.60    4.30
 -15 -11  10   10.90    4.70
  16  10 -10   54.19    5.50
 -16 -10  10   54.69    5.90
  17   9 -10   11.00    4.00
 -17  -9  10   14.80    4.60
 -17  -9  10    8.20    2.90
  18   8 -10   45.90    4.90
 -18  -8  10   41.90    3.60
 -18  -8  10   48.30    5.50
  19   7 -10   12.80    3.90
 -19  -7  10   11.40    4.70
  20   6 -10   -4.00    3.80
 -20  -6  10    1.20    3.70
 -20  -6  10   -6.10    4.30
  21   5 -10   -0.80    4.00
 -21  -5  10   -6.50    4.10
 -21  -5  10   -0.90    3.70
  22   4 -10   31.40    4.70
 -22  -4  10   37.70    4.90
 -22  -4  10   36.10    5.40
  23   3 -10   13.40    4.40
 -23  -3  10   13.30    4.80
 -23  -3  10   17.60    4.70
  24   2 -10   -1.20    4.20
 -24  -2  10    0.50    4.70
  25   1 -10    6.50    4.60
 -25  -1  10   10.50    4.90
  26   0 -10   65.69    6.80
 -26   0  10   73.89    6.80
 -27   1  10    4.40    5.20
 -28   2  10   12.50    5.60
   6  18  -9    0.60    5.70
  -6 -18   9   -0.40    5.90
   7  17  -9   -4.30    4.90
  -7 -17   9    4.30    5.90
   8  16  -9   -4.70    4.60
  -8 -16   9   -2.50    4.40
  -8 -16   9   -2.10    5.40
   9  15  -9   12.10    4.50
  -9 -15   9   20.70    5.00
  -9 -15   9   17.80    5.80
  10  14  -9   57.59    5.80
 -10 -14   9   45.70    6.00
  11  13  -9    4.40    3.90
 -11 -13   9   12.00    5.00
  12  12  -9   -2.80    3.30
 -12 -12   9    3.50    4.30
  13  11  -9   14.30    3.90
 -13 -11   9   16.80    4.90
  14  10  -9   35.60    4.50
 -14 -10   9   42.60    5.40
  15   9  -9   64.59    5.30
 -15  -9   9   62.49    5.50
 -15  -9   9   67.19    6.00
  16   8  -9    2.20    3.20
 -16  -8   9   -1.80    4.00
 -16  -8   9   -3.70    3.30
 -16  -8   9    0.60    2.30
  17   7  -9   -4.70    3.20
 -17  -7   9    2.30    3.30
 -17  -7   9    0.60    3.90
  18   6  -9  132.69    8.30
 -18  -6   9  117.49    8.20
 -18  -6   9  108.59    8.80
  19   5  -9   25.10    4.30
 -19  -5   9   20.40    4.00
 -19  -5   9   24.30    4.50
  20   4  -9    1.10    3.60
 -20  -4   9    2.10    3.80
 -20  -4   9   -2.60    3.90
  21   3  -9   -0.10    3.70
 -21  -3   9    6.50    4.30
 -21  -3   9    1.80    3.50
  22   2  -9   35.00    4.80
 -22  -2   9   38.70    5.10
 -22  -2   9   35.90    4.80
  23   1  -9    9.40    4.40
 -23  -1   9   10.70    4.60
 -23  -1   9   17.80    4.30
  24   0  -9   -1.50    4.40
 -24   0   9    8.50    5.00
  25  -1  -9   44.90    6.00
 -25   1   9   45.00    6.00
  26  -2  -9    2.20    5.20
 -26   2   9   -0.60    5.20
 -27   3   9    7.90    8.20
 -27   3   9   20.40    5.90
 -28   4   9    0.00    8.40
 -28   4   9    5.40    5.60
   4  18  -8   -5.30    5.10
  -4 -18   8    6.80    6.00
   5  17  -8    7.40    5.50
  -5 -17   8    3.70    5.50
   6  16  -8   12.50    5.00
  -6 -16   8   19.40    4.30
  -6 -16   8   14.60    6.00
   7  15  -8    3.10    4.90
   7  15  -8   -5.90    4.30
  -7 -15   8    3.30    4.00
  -7 -15   8   -2.40    5.30
   8  14  -8   17.60    5.10
   8  14  -8   22.60    4.80
  -8 -14   8   24.30    4.40
  -8 -14   8   14.40    5.00
   9  13  -8    1.90    3.50
   9  13  -8   -2.90    4.10
  -9 -13   8    2.10    4.30
  10  12  -8   53.59    5.10
  10  12  -8   56.09    5.90
 -10 -12   8   48.30    5.50
  11  11  -8    3.50    3.70
  11  11  -8    4.80    3.40
 -11 -11   8   -1.00    3.90
  12  10  -8   11.60    3.60
  12  10  -8   10.20    3.40
 -12 -10   8   15.50    4.30
  13   9  -8   22.80    3.60
  13   9  -8   17.50    3.80
 -13  -9   8   19.40    4.50
 -13  -9   8   16.90    3.20
 -13  -9   8   23.50    3.70
  14   8  -8   19.60    3.70
 -14  -8   8   17.30    2.80
 -14  -8   8   20.90    3.70
 -14  -8   8   15.20    3.70
  15   7  -8   61.19    4.90
 -15  -7   8   59.39    5.30
 -15  -7   8   46.20    4.40
 -15  -7   8   41.90    3.60
  16   6  -8   41.20    4.50
 -16  -6   8   41.80    4.50
 -16  -6   8   37.50    4.70
  17   5  -8  240.28   11.60
 -17  -5   8  232.38   11.80
 -17  -5   8  249.78   11.60
  18   4  -8   22.10    3.90
 -18  -4   8   16.90    4.00
 -18  -4   8   31.40    4.10
  19   3  -8   92.29    7.60
 -19  -3   8   88.19    7.70
 -19  -3   8   99.39    7.40
  20   2  -8    2.20    3.80
 -20  -2   8    3.20    3.60
 -20  -2   8   -0.60    3.70
  21   1  -8   75.59    6.20
 -21  -1   8   87.59    8.00
 -21  -1   8   79.39    7.20
  22   0  -8   29.20    5.10
 -22   0   8   33.80    4.70
 -22   0   8   36.90    5.10
  23  -1  -8  172.08   11.10
 -23   1   8  182.38   10.60
 -23   1   8  187.28   11.20
  24  -2  -8    6.40    4.90
 -24   2   8    0.30    4.70
 -24   2   8   -5.10    6.70
  25  -3  -8   12.20    5.20
 -25   3   8    3.30    4.80
 -25   3   8   12.40    7.80
 -26   4   8   23.60    5.80
 -26   4   8   22.50    8.20
 -27   5   8    0.70    7.80
 -27   5   8    3.50    5.50
   2  18  -7   22.30    6.30
  -2 -18   7   13.20    5.80
   3  17  -7   -6.20    5.70
   3  17  -7    0.70    5.40
  -3 -17   7    3.10    5.50
   4  16  -7    0.70    5.50
   4  16  -7    0.40    4.70
  -4 -16   7    0.40    5.20
   5  15  -7   -3.80    4.00
   5  15  -7   -1.10    5.00
  -5 -15   7    5.60    3.70
  -5 -15   7   -3.30    4.90
   6  14  -7   74.59    6.80
   6  14  -7   63.29    6.00
  -6 -14   7   66.89    6.30
  -6 -14   7   73.39    6.80
   7  13  -7   -1.50    4.10
   7  13  -7   -0.50    3.50
  -7 -13   7    0.60    4.10
  -7 -13   7    6.60    3.80
   8  12  -7    2.20    3.20
   8  12  -7    5.20    4.00
  -8 -12   7    4.30    4.30
   9  11  -7  190.68   10.00
   9  11  -7  184.58   10.10
  -9 -11   7  182.48   10.30
  10  10  -7   60.19    5.10
  10  10  -7   52.99    4.70
 -10 -10   7   58.69    5.40
 -10 -10   7   50.89    4.60
 -10 -10   7   53.99    4.70
  11   9  -7   45.90    4.20
  11   9  -7   48.90    4.40
 -11  -9   7   43.30    4.50
 -11  -9   7   41.00    4.00
 -11  -9   7   44.20    4.20
  12   8  -7   22.20    3.40
  12   8  -7   26.00    3.80
 -12  -8   7   18.60    3.30
 -12  -8   7   22.50    4.00
 -12  -8   7   16.10    2.70
  13   7  -7  336.07   14.30
  13   7  -7  369.16   14.90
 -13  -7   7  345.17   15.10
 -13  -7   7  366.76   14.90
 -13  -7   7  333.97   14.00
  14   6  -7   42.40    4.10
 -14  -6   7   42.10    3.80
 -14  -6   7   44.80    4.20
 -14  -6   7   39.00    4.10
  15   5  -7  191.68    9.50
 -15  -5   7  175.88    9.50
 -15  -5   7  192.18    9.50
  16   4  -7    3.50    3.10
 -16  -4   7    7.10    3.20
 -16  -4   7    7.40    3.40
  17   3  -7   50.39    4.60
 -17  -3   7   43.00    4.40
 -17  -3   7   37.20    4.40
  18   2  -7  123.79    8.40
 -18  -2   7  129.09    8.30
 -18  -2   7  133.59    8.10
  19   1  -7   27.90    4.50
 -19  -1   7   31.90    4.20
 -19  -1   7   25.00    4.40
  20   0  -7    3.60    4.00
 -20   0   7   -0.50    3.30
 -20   0   7   -6.70    3.60
  21  -1  -7    0.20    4.20
 -21   1   7    7.90    6.20
 -21   1   7    9.00    4.30
 -21   1   7    1.50    3.60
  22  -2  -7  189.78   11.30
 -22   2   7  192.18   11.40
 -22   2   7  184.58   14.30
 -22   2   7  195.28   11.20
  23  -3  -7   -0.50    4.60
 -23   3   7    6.70    6.40
 -23   3   7    6.30    4.70
  24  -4  -7    1.80    4.80
 -24   4   7   -4.60    6.50
 -24   4   7   -1.20    4.50
  25  -5  -7   -1.80    5.10
 -25   5   7   -1.70    7.00
 -25   5   7   10.70    5.00
 -26   6   7   38.30    6.20
 -26   6   7   37.20    8.80
   0  18  -6    1.10    5.10
   0 -18   6  -10.80    5.00
   1  17  -6    1.10    5.10
   1  17  -6    6.10    5.70
  -1 -17   6   -0.30    5.10
   2  16  -6   20.90    5.70
   2  16  -6   16.20    5.20
  -2 -16   6   17.40    5.50
   3  15  -6   46.90    6.30
   3  15  -6   51.99    5.80
  -3 -15   6   46.00    5.90
   4  14  -6   -0.60    3.90
   4  14  -6   -0.10    4.60
  -4 -14   6   -2.70    4.60
  -4 -14   6   -1.00    3.20
   5  13  -6   47.70    5.10
   5  13  -6   50.49    5.70
  -5 -13   6   54.99    5.80
  -5 -13   6   45.90    4.50
   6  12  -6    6.10    3.40
   6  12  -6   10.10    4.30
  -6 -12   6    4.50    3.40
  -6 -12   6    3.20    3.80
   7  11  -6  125.99    8.10
   7  11  -6  112.09    7.60
  -7 -11   6  105.79    8.10
   8  10  -6    1.80    3.20
   8  10  -6   -0.70    3.00
  -8 -10   6   -2.20    2.60
  -8 -10   6   -6.40    3.40
  -8 -10   6    2.60    2.70
   9   9  -6  126.49    7.40
   9   9  -6  121.99    7.20
  -9  -9   6  117.39    7.00
  -9  -9   6  113.89    6.80
  -9  -9   6  119.59    7.40
  10   8  -6   24.60    3.30
  10   8  -6   22.00    3.30
  10   8  -6   23.60    3.30
 -10  -8   6   22.40    3.80
 -10  -8   6   23.20    2.90
 -10  -8   6   21.30    3.40
  11   7  -6  166.88    8.10
  11   7  -6  159.78    7.80
  11   7  -6  146.39    7.60
 -11  -7   6  152.78    7.90
 -11  -7   6  158.28    7.40
 -11  -7   6  157.28    8.20
  12   6  -6   44.10    3.50
  12   6  -6   44.80    3.80
 -12  -6   6   44.30    4.20
 -12  -6   6   41.50    3.20
 -12  -6   6   49.50    4.00
  13   5  -6  190.28    9.10
  13   5  -6  180.68   10.70
 -13  -5   6  195.78    9.10
 -13  -5   6  183.28    9.10
  14   4  -6  813.32   31.00
  14   4  -6  779.52   30.90
 -14  -4   6  836.12   31.10
 -14  -4   6  778.92   31.00
  15   3  -6   44.40    4.10
 -15  -3   6   37.60    4.00
 -15  -3   6   47.70    4.20
  16   2  -6   15.10    3.50
 -16  -2   6   14.80    3.40
 -16  -2   6   16.80    3.40
  17   1  -6    1.50    3.40
 -17  -1   6   -6.10    2.80
 -17  -1   6   -5.20    2.90
  18   0  -6  162.18    9.60
 -18   0   6  162.38   11.40
 -18   0   6  174.58    9.30
 -18   0   6  163.68    9.30
  19  -1  -6    7.00    3.90
 -19   1   6    2.60    3.30
 -19   1   6    6.20    3.80
 -19   1   6    6.10    5.20
  20  -2  -6   39.10    5.00
 -20   2   6   35.30    4.80
 -20   2   6   34.40    6.40
 -20   2   6   36.40    4.80
  21  -3  -6   32.80    5.10
 -21   3   6   27.60    6.60
 -21   3   6   26.00    4.70
 -21   3   6   30.40    5.00
  22  -4  -6   58.49    6.30
 -22   4   6   57.89    6.10
 -22   4   6   80.19    8.90
  23  -5  -6   33.40    5.90
 -23   5   6   32.60    7.60
 -23   5   6   19.70    5.20
  24  -6  -6  -10.20    5.50
 -24   6   6    4.80    5.20
 -24   6   6   -6.60    6.80
 -25   7   6   21.60    8.20
 -25   7   6   16.70    5.60
  -2  18  -5    1.70    5.40
  -2  18  -5   -2.40    6.00
   2 -18   5    2.10    5.30
  -1  17  -5    0.30    6.00
  -1  17  -5    2.60    5.10
   1 -17   5    5.00    5.10
   0  16  -5    3.30    4.90
   0  16  -5   16.10    5.60
   0 -16   5    4.30    4.80
   1  15  -5   67.89    6.70
   1  15  -5   76.69    7.40
  -1 -15   5   68.89    6.60
   2  14  -5   -8.60    4.40
   2  14  -5   -0.60    4.00
  -2 -14   5   -0.50    4.10
   3  13  -5   26.40    5.00
   3  13  -5   29.10    4.20
  -3 -13   5   27.50    4.90
   4  12  -5   -2.30    3.10
   4  12  -5   -1.00    3.80
  -4 -12   5   -5.30    2.80
  -4 -12   5   -0.90    3.70
   5  11  -5   91.09    7.30
   5  11  -5   94.69    6.80
  -5 -11   5   89.79    7.20
   6  10  -5  250.57   11.10
   6  10  -5  226.48   11.20
  -6 -10   5  243.98   11.30
  -6 -10   5  249.38   11.10
  -6 -10   5  239.98   10.90
   7   9  -5   36.90    3.60
   7   9  -5   42.40    4.00
   7   9  -5   38.60    3.60
  -7  -9   5   44.30    4.10
  -7  -9   5   36.40    3.60
  -7  -9   5   42.80    3.60
   8   8  -5    0.70    2.20
   8   8  -5   -0.40    2.40
   8   8  -5   -0.50    2.10
  -8  -8   5   -2.20    2.40
  -8  -8   5   -1.10    2.40
  -8  -8   5    0.40    2.10
   9   7  -5    9.00    2.40
   9   7  -5    5.60    2.20
   9   7  -5    5.60    2.40
  -9  -7   5    6.40    2.20
  -9  -7   5    6.20    2.70
  -9  -7   5   10.30    2.40
  10   6  -5  696.43   27.40
  10   6  -5  734.93   27.90
  10   6  -5  704.73   27.80
 -10  -6   5  729.83   27.90
 -10  -6   5  756.82   27.40
 -10  -6   5  717.33   28.00
  11   5  -5   10.50    2.10
  11   5  -5   11.70    2.60
 -11  -5   5   12.70    2.70
 -11  -5   5   11.00    1.90
 -11  -5   5   10.70    2.60
  12   4  -5   -0.30    2.50
  12   4  -5    1.00    0.80
  12   4  -5    1.30    2.40
 -12  -4   5   -1.20    2.50
 -12  -4   5   -1.80    2.40
  14   2  -5  292.87   13.10
  14   2  -5  318.07   15.10
 -14  -2   5  317.67   13.10
 -14  -2   5  283.67   13.00
  15   1  -5  182.48   10.30
  15   1  -5  171.38    9.10
 -15  -1   5  166.08    8.90
 -15  -1   5  186.78    9.10
  16   0  -5   -6.50    3.10
 -16   0   5   -3.90    3.50
 -16   0   5   -1.30    2.70
 -16   0   5   -6.70    2.90
  17  -1  -5  212.58   10.60
 -17   1   5  201.38   12.30
 -17   1   5  218.48   10.30
 -17   1   5  187.28   10.20
  18  -2  -5   34.30    4.70
 -18   2   5   23.20    5.40
 -18   2   5   25.30    4.10
 -18   2   5   31.80    4.30
  19  -3  -5  271.57   13.60
 -19   3   5  268.17   13.10
 -19   3   5  264.57   13.00
 -19   3   5  261.67   15.50
  20  -4  -5   36.40    5.90
 -20   4   5   34.50    5.00
 -20   4   5   40.80    6.70
  21  -5  -5   76.89    7.10
 -21   5   5   86.39    8.80
  22  -6  -5    7.30    5.20
 -22   6   5    9.40    6.60
  23  -7  -5   62.89    7.10
 -23   7   5   77.19    9.30
  24  -8  -5   -0.10    5.70
 -24   8   5   -5.00    7.20
  -4  18  -4    0.10    6.10
  -4  18  -4    3.80    5.10
   4 -18   4    9.00    5.60
  -3  17  -4   34.60    6.30
  -3  17  -4   29.00    6.90
   3 -17   4   30.80    6.30
  -2  16  -4   48.20    6.80
  -2  16  -4   39.50    5.90
   2 -16   4   38.40    6.40
  -1  15  -4   15.60    5.40
  -1  15  -4   17.70    5.00
   1 -15   4   17.10    4.80
   0  14  -4    3.20    3.70
   0  14  -4    1.80    4.70
   0 -14   4    7.40    4.60
   1  13  -4   15.60    4.00
   1  13  -4   19.30    4.90
  -1 -13   4   15.70    4.30
   2  12  -4  283.97   13.20
   2  12  -4  254.57   12.50
  -2 -12   4  275.77   12.90
   3  11  -4   52.89    5.00
   3  11  -4   48.20    4.30
  -3 -11   4   46.70    4.90
   4  10  -4    4.20    2.40
   4  10  -4    5.60    2.30
   4  10  -4    4.70    3.00
  -4 -10   4    8.50    2.90
  -4 -10   4    6.20    2.30
  -4 -10   4    6.30    2.60
   5   9  -4  130.49    7.00
   5   9  -4  131.69    6.90
   5   9  -4  127.59    7.40
  -5  -9   4  126.09    6.80
  -5  -9   4  133.39    7.10
  -5  -9   4  134.99    7.20
   6   8  -4  405.06   16.20
   6   8  -4  402.86   16.10
   6   8  -4  401.66   16.20
  -6  -8   4  410.06   16.10
  -6  -8   4  374.56   16.20
  -6  -8   4  408.86   16.10
   7   7  -4  129.59    6.60
   7   7  -4  125.69    6.60
   7   7  -4  127.69    6.50
  -7  -7   4  123.19    6.30
  -7  -7   4  122.89    6.90
  -7  -7   4  129.09    6.60
   8   6  -4   -0.50    2.00
   8   6  -4    0.30    2.10
   8   6  -4   -4.00    1.90
  -8  -6   4   -1.50    2.00
  -8  -6   4   -1.00    1.70
  -8  -6   4   -2.40    2.20
   9   5  -4   30.80    2.70
   9   5  -4   32.60    2.90
   9   5  -4   34.30    2.90
  -9  -5   4   35.30    2.60
  -9  -5   4   31.90    3.00
  -9  -5   4   37.90    3.20
  10   4  -4   78.89    5.10
  10   4  -4   49.70    4.20
 -10  -4   4   73.09    3.80
 -10  -4   4   76.99    4.90
 -10  -4   4   70.99    5.00
  11   3  -4   55.89    4.80
  11   3  -4   41.30    4.20
 -11  -3   4   56.29    4.60
 -11  -3   4   55.99    4.60
  12   2  -4  172.58    9.60
  12   2  -4  181.08    8.60
 -12  -2   4  161.58    8.30
 -12  -2   4  179.68    8.40
  13   1  -4  141.19    7.60
  13   1  -4  140.19    8.50
 -13  -1   4  139.89    7.40
 -13  -1   4  131.69    7.30
  14   0  -4  184.28    9.20
  14   0  -4  181.08   10.30
 -14   0   4  166.78    9.00
 -14   0   4  198.88    9.10
 -14   0   4  196.48   10.80
  15  -1  -4   21.50    3.20
  15  -1  -4   22.90    3.70
  15  -1  -4   23.10    4.00
 -15   1   4   24.20    4.30
 -15   1   4   19.30    3.40
 -15   1   4   21.80    3.20
  16  -2  -4    4.10    3.70
 -16   2   4   12.20    3.40
 -16   2   4   12.30    3.20
 -16   2   4    8.20    4.30
  17  -3  -4   92.39    8.30
 -17   3   4  107.39    9.10
 -17   3   4  108.19    7.60
  18  -4  -4  109.39    9.10
 -18   4   4  102.49    9.60
 -18   4   4  104.39    8.30
  19  -5  -4   27.60    5.30
 -19   5   4   21.80    5.80
  20  -6  -4    5.40    5.10
 -20   6   4    0.50    5.30
  21  -7  -4   35.50    6.00
 -21   7   4   34.70    6.90
  22  -8  -4   64.59    7.40
 -22   8   4   79.39    8.90
  23  -9  -4    3.70    5.80
 -23   9   4   10.10    6.90
  -6  18  -3   17.90    6.40
  -6  18  -3    7.10    5.40
   6 -18   3   16.10    5.80
  -5  17  -3    8.80    6.00
  -5  17  -3    4.90    4.80
   5 -17   3    4.80    5.40
  -4  16  -3    4.40    5.50
  -4  16  -3    0.70    4.70
   4 -16   3   -8.00    4.70
  -3  15  -3    4.60    5.30
  -3  15  -3    4.20    4.50
   3 -15   3    0.60    4.60
  -2  14  -3  115.89    9.40
  -2  14  -3   98.39    8.60
   2 -14   3   98.89    8.90
  -1  13  -3    5.30    4.30
  -1  13  -3    4.20    3.40
   1 -13   3   -4.70    3.80
   0  12  -3   -0.70    3.60
   0  12  -3   -2.70    3.00
   0 -12   3    0.00    3.70
   1  11  -3   23.80    3.30
   1  11  -3   16.60    3.80
   1  11  -3   18.70    3.30
  -1 -11   3   21.40    3.90
   2  10  -3  113.79    6.80
   2  10  -3  126.09    6.70
   2  10  -3  128.39    7.60
  -2 -10   3  114.99    6.40
  -2 -10   3  120.59    6.80
  -2 -10   3  113.89    7.30
   3   9  -3   65.69    5.50
   3   9  -3   65.89    5.00
   3   9  -3   64.79    4.80
  -3  -9   3   64.09    4.70
  -3  -9   3   66.39    5.20
  -3  -9   3   69.29    5.40
   4   8  -3    9.80    2.20
   4   8  -3    7.80    2.40
   4   8  -3    4.90    2.60
  -4  -8   3    8.10    2.50
  -4  -8   3    7.40    2.30
  -4  -8   3    9.10    2.50
   5   7  -3  225.28   10.10
   5   7  -3  237.08    9.90
   5   7  -3  235.18    9.90
  -5  -7   3  236.38   10.10
  -5  -7   3  231.18    9.90
  -5  -7   3  234.28    9.90
   6   6  -3  106.69    5.60
   6   6  -3  106.19    5.70
   6   6  -3  107.89    5.60
  -6  -6   3  105.99    5.70
  -6  -6   3  109.19    5.70
  -6  -6   3  110.49    5.50
   7   5  -3  120.89    6.10
   7   5  -3  125.29    6.20
   7   5  -3  118.39    5.90
  -7  -5   3  130.49    6.30
  -7  -5   3  132.69    6.10
  -7  -5   3  129.29    5.80
   8   4  -3   44.80    3.20
   8   4  -3   49.60    4.00
   8   4  -3   48.10    3.80
  -8  -4   3   45.80    3.10
  -8  -4   3   42.50    3.80
  -8  -4   3   49.99    4.00
   9   3  -3  430.46   17.00
  -9  -3   3  444.46   17.00
  -9  -3   3  422.86   17.00
  11   1  -3  148.39    8.30
  11   1  -3  139.89    7.20
 -11  -1   3  124.49    7.00
 -11  -1   3  141.09    7.10
  12   0  -3   -3.80    2.60
  12   0  -3   -3.00    2.80
 -12   0   3   -0.90    2.90
 -12   0   3   -1.60    2.50
 -12   0   3   -0.70    2.20
  13  -1  -3  117.99    7.50
  13  -1  -3  110.79    7.20
  13  -1  -3   85.99    5.50
 -13   1   3  117.09    6.40
 -13   1   3  111.29    7.70
 -13   1   3  115.49    6.60
  14  -2  -3   94.79    7.00
  14  -2  -3   72.39    5.40
  14  -2  -3   81.49    7.10
 -14   2   3   90.79    6.10
 -14   2   3   97.09    7.20
  15  -3  -3   16.50    4.00
 -15   3   3   18.00    3.40
 -15   3   3   18.00    4.20
  16  -4  -3    1.70    3.80
 -16   4   3    5.30    4.30
 -16   4   3    4.50    3.20
  17  -5  -3   -2.50    4.20
 -17   5   3   -3.10    4.20
 -17   5   3   -4.40    3.50
  18  -6  -3  105.99    9.60
 -18   6   3  118.69   10.00
  19  -7  -3   14.00    5.00
 -19   7   3    9.50    5.10
  20  -8  -3   10.60    5.40
 -20   8   3    7.70    5.60
  21  -9  -3   13.10    5.70
 -21   9   3   11.20    6.00
  22 -10  -3   27.10    6.50
 -22  10   3   19.50    6.60
  -8  18  -2    4.80    6.30
  -8  18  -2    0.90    5.70
   8 -18   2   -1.00    5.50
  -7  17  -2    6.20    5.90
  -7  17  -2   -1.30    5.30
   7 -17   2   -2.80    5.10
  -6  16  -2   10.90    5.70
  -6  16  -2    7.20    4.90
   6 -16   2    5.20    5.30
  -5  15  -2    2.20    5.10
  -5  15  -2    0.10    4.30
   5 -15   2    0.50    4.50
  -4  14  -2   -1.30    3.90
  -4  14  -2    2.60    4.70
   4 -14   2    1.30    4.20
  -3  13  -2   81.89    6.60
  -3  13  -2   87.29    7.00
   3 -13   2   90.79    8.10
  -2  12  -2   79.39    6.40
  -2  12  -2   89.19    6.50
  -2  12  -2   84.19    7.40
   2 -12   2   80.99    7.40
  -1  11  -2   53.59    4.60
  -1  11  -2   61.59    5.20
  -1  11  -2   52.39    4.90
   1 -11   2   70.19    5.10
   0  10  -2   -1.00    2.90
   0  10  -2    0.60    2.40
   0  10  -2    0.20    2.40
   0 -10   2   -0.60    2.20
   0 -10   2   -1.10    1.10
   0 -10   2   -2.90    2.90
   1   9  -2  149.59    7.40
   1   9  -2  145.49    7.40
   1   9  -2  146.09    7.80
  -1  -9   2  159.28    7.90
  -1  -9   2  150.48    7.20
   2   8  -2   -0.60    2.40
   2   8  -2    0.50    1.90
   2   8  -2    1.90    2.10
  -2  -8   2    3.00    2.50
  -2  -8   2    0.20    2.20
  -2  -8   2   -0.70    1.80
   3   7  -2  232.68    9.70
   3   7  -2  231.58    9.80
   3   7  -2  243.78   10.00
  -3  -7   2  222.78    9.60
  -3  -7   2  229.78    9.80
  -3  -7   2  225.48    9.80
   4   6  -2   22.80    2.20
   4   6  -2   22.60    2.60
   4   6  -2   25.00    2.30
  -4  -6   2   26.40    2.50
  -4  -6   2   19.90    2.40
  -4  -6   2   27.80    2.80
   5   5  -2   86.89    4.60
   5   5  -2   86.19    4.60
   5   5  -2   81.49    4.60
  -5  -5   2   85.29    4.40
  -5  -5   2   77.49    4.50
  -5  -5   2   81.19    4.70
   6   4  -2    6.30    1.60
   6   4  -2    6.00    1.80
   6   4  -2    5.20    1.90
  -6  -4   2    4.40    1.50
  -6  -4   2    2.80    1.70
  -6  -4   2    6.20    1.70
   7   3  -2   47.20    3.80
   7   3  -2   46.10    3.80
   7   3  -2   52.09    3.00
  -7  -3   2   52.89    2.90
  -7  -3   2   41.00    3.90
  -7  -3   2   48.60    3.80
   8   2  -2  139.39    6.60
   8   2  -2  132.79    6.40
   8   2  -2  139.99    7.30
  -8  -2   2  127.09    6.30
  -8  -2   2  138.19    6.40
   9   1  -2  657.23   28.30
   9   1  -2  658.13   25.20
  -9  -1   2  642.04   25.20
  -9  -1   2  672.53   25.20
  10   0  -2  984.60   42.80
  10   0  -2 1031.20   38.20
 -10   0   2  997.60   38.10
 -10   0   2 1114.69   38.30
 -10   0   2  905.91   42.70
  11  -1  -2  134.19    7.90
  11  -1  -2  121.99    7.40
 -11   1   2  136.99    7.90
 -11   1   2  128.19    6.70
  12  -2  -2   50.09    4.60
  12  -2  -2   47.80    4.30
 -12   2   2   41.90    4.20
 -12   2   2   52.49    4.10
  13  -3  -2    4.00    3.00
  13  -3  -2   -0.20    0.50
 -13   3   2    0.90    3.30
 -13   3   2    0.70    2.40
  14  -4  -2  272.17   12.10
 -14   4   2  243.28   13.00
 -14   4   2  248.58   11.70
  15  -5  -2   17.40    4.20
 -15   5   2   17.30    4.30
 -15   5   2   16.00    3.50
  16  -6  -2    5.40    2.70
  16  -6  -2    6.40    4.40
 -16   6   2    6.70    4.20
 -16   6   2    6.40    3.70
  17  -7  -2   10.20    4.90
  17  -7  -2   17.30    3.20
 -17   7   2    9.90    4.80
  18  -8  -2   47.40    6.10
 -18   8   2   50.59    6.50
  19  -9  -2   53.09    6.60
 -19   9   2   54.59    7.00
  20 -10  -2   -0.20    5.40
 -20  10   2    2.00    5.40
  21 -11  -2   14.60    6.10
 -21  11   2   14.00    6.30
 -10  18  -1   10.50    6.30
 -10  18  -1   10.40    5.80
  10 -18   1   17.30    6.30
  -9  17  -1   12.90    6.20
  -9  17  -1   10.90    5.50
   9 -17   1    8.50    5.90
  -8  16  -1    3.50    5.50
  -8  16  -1    0.30    4.50
   8 -16   1   -1.40    5.30
  -7  15  -1   -0.90    5.00
  -7  15  -1    2.30    4.30
   7 -15   1   -0.90    4.70
  -6  14  -1    1.60    4.10
  -6  14  -1   -4.70    4.50
   6 -14   1    1.70    4.40
  -5  13  -1   -0.70    3.90
  -5  13  -1    6.90    4.40
   5 -13   1   -2.00    3.80
  -4  12  -1    8.30    3.40
  -4  12  -1    2.90    3.90
  -4  12  -1    4.50    2.80
   4 -12   1    7.80    3.70
  -3  11  -1  541.85   21.70
  -3  11  -1  540.45   21.90
  -3  11  -1  543.15   22.10
   3 -11   1  553.24   22.00
  -2  10  -1    3.90    3.10
  -2  10  -1   11.20    2.50
  -2  10  -1    6.80    2.30
   2 -10   1    8.30    2.20
   2 -10   1   11.90    2.80
   2 -10   1    6.60    3.10
  -1   9  -1  359.36   14.60
  -1   9  -1  360.36   14.60
  -1   9  -1  353.36   14.80
   1  -9   1  344.07   14.40
   1  -9   1  364.96   14.70
   1  -9   1  353.36   14.70
   0   8  -1   46.30    4.20
   0   8  -1   49.20    4.10
   0   8  -1   50.59    4.20
   0  -8   1   55.49    3.80
   0  -8   1   50.29    3.90
   1   7  -1  101.79    5.80
   1   7  -1  110.79    5.40
   1   7  -1  111.89    5.40
  -1  -7   1   90.49    5.20
  -1  -7   1  108.49    5.20
  -1  -7   1  116.99    5.70
   2   6  -1  211.98    8.70
   2   6  -1  203.58    8.90
   2   6  -1  208.38    8.70
  -2  -6   1  212.68    8.60
  -2  -6   1  202.58    8.70
  -2  -6   1  214.78    8.80
   3   5  -1   49.90    3.30
   3   5  -1   43.10    3.40
   3   5  -1   45.40    3.50
  -3  -5   1   49.70    3.60
  -3  -5   1   45.00    3.40
  -3  -5   1   49.40    3.50
   4   4  -1  522.25   19.90
   4   4  -1  512.55   19.70
   4   4  -1  505.35   19.90
  -4  -4   1  548.75   19.70
  -4  -4   1  524.65   19.90
  -4  -4   1  511.15   19.90
   5   3  -1  808.02   29.40
   5   3  -1  779.72   29.80
   5   3  -1  794.02   29.90
  -5  -3   1  787.12   29.90
  -5  -3   1  808.82   29.40
  -5  -3   1  773.02   29.80
   6   2  -1   44.50    3.60
   6   2  -1   41.20    3.80
   6   2  -1   44.60    2.70
  -6  -2   1   43.40    2.70
  -6  -2   1   42.10    3.50
  -6  -2   1   48.70    3.60
   7   1  -1   69.09    5.00
   7   1  -1   79.09    4.70
  -7  -1   1   67.29    4.40
  -7  -1   1   70.69    4.30
   8   0  -1    1.00    2.20
   8   0  -1   -1.40    2.10
  -8   0   1    1.40    1.90
  -8   0   1    1.10    2.30
   9  -1  -1   50.19    3.70
   9  -1  -1   47.70    4.90
   9  -1  -1   38.90    3.70
  -9   1   1   51.79    4.00
  -9   1   1   49.40    4.50
  10  -2  -1  788.52   34.30
  10  -2  -1  795.62   30.80
  10  -2  -1  834.32   30.90
 -10   2   1  815.62   30.80
 -10   2   1  776.72   34.30
  11  -3  -1   26.90    2.40
  11  -3  -1   23.80    3.40
  11  -3  -1   23.30    3.00
 -11   3   1   25.70    3.60
 -11   3   1   25.50    3.00
  12  -4  -1   43.90    3.70
  12  -4  -1   40.90    4.20
  12  -4  -1   43.90    3.90
 -12   4   1   48.20    4.10
 -12   4   1   46.60    4.40
  13  -5  -1  170.98    8.00
  13  -5  -1  182.18    9.70
 -13   5   1  157.48    8.80
 -13   5   1  172.98    9.80
  14  -6  -1   52.79    5.40
  14  -6  -1   60.39    5.20
 -14   6   1   64.49    5.40
 -14   6   1   68.99    5.90
  15  -7  -1   42.30    4.00
  15  -7  -1   36.50    5.40
 -15   7   1   46.80    5.50
  16  -8  -1    4.70    3.20
  16  -8  -1    2.50    4.70
 -16   8   1   -1.40    4.40
  17  -9  -1   76.79    7.20
 -17   9   1   83.79    7.70
  18 -10  -1   13.30    5.80
 -18  10   1    9.80    5.50
  19 -11  -1   47.80    6.80
 -19  11   1   50.89    7.10
  20 -12  -1    5.90    5.90
 -20  12   1   -6.10    5.60
 -11  17   0   21.00    5.60
 -11  17   0   19.80    6.20
  11 -17   0   22.30    6.60
 -10  16   0    1.40    5.30
 -10  16   0    4.30    4.90
  10 -16   0   -8.60    5.00
  -9  15   0   29.20    5.30
  -9  15   0   34.70    6.20
   9 -15   0   44.00    5.90
  -8  14   0   15.70    4.40
  -8  14   0   19.70    5.20
   8 -14   0   19.30    5.20
  -7  13   0   -2.10    3.50
  -7  13   0    2.00    4.40
   7 -13   0   -5.40    3.90
  -6  12   0   63.09    5.90
  -6  12   0   69.29    6.00
  -6  12   0   65.29    5.30
   6 -12   0   66.39    5.50
  -5  11   0   26.00    3.70
  -5  11   0   28.50    4.30
  -5  11   0   23.50    3.20
   5 -11   0   28.10    4.00
  -4  10   0   18.70    3.40
  -4  10   0   15.50    3.10
  -4  10   0   15.90    2.80
   4 -10   0   14.90    2.90
   4 -10   0    7.00    1.60
   4 -10   0   15.10    3.30
  -3   9   0   61.29    5.50
  -3   9   0   57.59    4.60
  -3   9   0   50.99    4.30
   3  -9   0   60.49    4.90
   3  -9   0   57.69    4.10
  -2   8   0  902.11   34.80
  -2   8   0  876.61   34.70
  -2   8   0  934.21   34.70
   2  -8   0  929.41   34.70
   2  -8   0  939.11   34.80
  -1   7   0    4.30    2.00
  -1   7   0    1.40    1.80
  -1   7   0    3.00    2.10
   1  -7   0    0.20    1.90
   1  -7   0   -0.40    0.40
   1  -7   0   -0.70    1.40
   0   6   0    8.70    1.60
   0   6   0    4.90    1.90
   0   6   0   10.30    1.80
   0  -6   0    8.20    1.80
   1   5   0  296.27   11.40
   1   5   0  288.87   11.30
   1   5   0  278.67   11.50
  -1  -5   0  289.67   11.40
  -1  -5   0  291.97   11.40
   2   4   0  705.23   25.80
   2   4   0  646.54   25.70
   2   4   0  696.43   25.80
  -2  -4   0  678.93   25.80
  -2  -4   0  695.43   25.70
   3   3   0  124.99    5.50
   3   3   0  117.29    5.60
   3   3   0  118.59    5.50
  -3  -3   0  118.89    5.60
  -3  -3   0  130.59    5.40
   4   2   0  245.28   10.20
   4   2   0  243.98   10.10
   4   2   0  249.58    9.80
  -4  -2   0  254.67   10.10
  -4  -2   0  244.28   10.10
  -4  -2   0  256.97    9.80
  -5  -1   0  185.18    7.90
   6   0   0 1732.93   69.59
   6   0   0 1613.24   62.19
  -6   0   0 1666.53   62.19
   7  -1   0   37.20    3.50
   7  -1   0   58.79    4.20
   7  -1   0   40.50    3.70
  -7   1   0   44.60    3.60
  -7   1   0   52.09    4.00
   8  -2   0  375.96   15.50
   8  -2   0  398.36   15.40
   8  -2   0  376.56   16.90
  -8   2   0  390.06   15.30
  -8   2   0  370.16   16.90
   9  -3   0  793.12   30.40
   9  -3   0  785.72   29.70
   9  -3   0  801.32   30.40
  -9   3   0  807.92   30.40
  -9   3   0  766.32   33.70
  10  -4   0   31.40    3.60
  10  -4   0   22.50    2.90
 -10   4   0   27.90    3.50
 -10   4   0   33.50    3.50
  11  -5   0  327.67   14.90
  11  -5   0  374.46   15.40
  11  -5   0  398.36   14.50
 -11   5   0  345.67   16.50
 -11   5   0  373.06   15.10
 -11   5   0  310.47   14.80
  12  -6   0   58.89    5.20
  12  -6   0   63.69    5.30
 -12   6   0   57.49    4.80
 -12   6   0   66.19    5.80
 -12   6   0   65.79    5.40
  13  -7   0   23.00    3.40
  13  -7   0   24.00    4.50
 -13   7   0   28.90    4.00
 -13   7   0   35.00    4.60
  14  -8   0   23.00    5.20
  14  -8   0   17.40    3.60
 -14   8   0   17.60    4.50
 -14   8   0   17.50    3.90
  15  -9   0   13.50    5.00
 -15   9   0   14.20    4.10
 -15   9   0   12.10    4.60
  16 -10   0    3.60    5.40
 -16  10   0   -0.50    4.30
 -16  10   0    2.80    4.60
  17 -11   0   18.40    6.00
 -17  11   0   16.30    5.00
 -17  11   0   14.40    5.50
  18 -12   0   40.60    7.10
 -18  12   0   44.30    7.00
 -13  17   1    7.10    5.80
 -13  17   1    7.90    5.60
  13 -17  -1    7.70    6.50
 -12  16   1    3.20    5.50
 -12  16   1   -8.40    4.80
  12 -16  -1   -5.90    5.30
 -11  15   1   28.80    5.50
 -11  15   1   30.80    5.80
  11 -15  -1   30.10    5.90
 -10  14   1   58.29    6.40
 -10  14   1   53.89    5.90
  10 -14  -1   59.29    6.20
  -9  13   1   -1.40    4.40
  -9  13   1   -3.30    3.80
   9 -13  -1   -7.90    4.00
  -8  12   1   22.70    4.00
  -8  12   1   22.10    4.60
  -8  12   1   26.10    3.80
   8 -12  -1   23.10    4.40
  -7  11   1    7.00    3.00
  -7  11   1    5.70    2.70
  -7  11   1    6.30    3.80
   7 -11  -1    9.70    3.70
  -6  10   1  168.08    8.80
  -6  10   1  167.08    9.10
  -6  10   1  184.68    8.50
   6 -10  -1  187.58    9.10
   6 -10  -1  174.88    8.70
  -5   9   1   27.10    3.00
  -5   9   1   28.40    3.70
  -5   9   1   36.90    3.20
   5  -9  -1   24.40    3.00
   5  -9  -1   28.30    3.50
   5  -9  -1   22.40    2.60
  -4   8   1   -4.90    2.20
  -4   8   1   -5.10    1.80
  -4   8   1   -2.60    2.50
   4  -8  -1   -2.00    1.80
   4  -8  -1   -7.00    2.40
   4  -8  -1   -1.90    1.90
  -3   7   1  124.09    5.70
  -3   7   1  112.99    5.60
  -3   7   1  109.89    6.20
   3  -7  -1  114.29    5.90
   3  -7  -1  119.49    6.00
   3  -7  -1  118.39    5.50
  -2   6   1  217.18    8.60
  -2   6   1  212.98    8.70
  -2   6   1  198.38    8.90
   2  -6  -1  210.68    8.80
  -1   5   1  140.59    5.90
  -1   5   1  135.79    6.00
  -1   5   1  134.69    6.30
   1  -5  -1  142.69    6.20
   1  -5  -1  139.59    6.10
   1  -5  -1  138.79    5.80
   0   4   1 1168.18   42.60
   0   4   1 1144.59   42.60
   0   4   1 1104.49   42.40
   0  -4  -1 1168.88   42.60
   0  -4  -1 1134.29   42.60
   1   3   1 4097.89  153.88
   1   3   1 4135.69  155.18
   1   3   1 4213.98  155.08
  -1  -3  -1 4243.18  155.38
  -1  -3  -1 4191.08  155.18
  -1  -3  -1 4289.07  153.88
   2   2   1   43.50    2.90
   2   2   1   47.20    2.90
   2   2   1   38.80    3.00
  -2  -2  -1   37.60    2.90
  -2  -2  -1   40.90    2.80
  -2  -2  -1   44.50    2.90
   3   1   1  830.62   31.40
  -3  -1  -1  846.52   31.50
   4   0   1   -2.30    1.70
   4   0   1   -2.50    1.70
  -4   0  -1   -1.00    1.60
   5  -1   1  572.84   24.30
   5  -1   1  560.44   22.00
   5  -1   1  585.64   22.00
  -5   1  -1  580.54   21.90
  -5   1  -1  570.54   24.30
   6  -2   1  356.96   14.60
   6  -2   1  372.16   14.60
  -6   2  -1  363.36   15.90
  -6   2  -1  368.46   14.50
  -6   2  -1  360.06   14.40
   7  -3   1 4506.25  167.78
   7  -3   1 4459.55  167.68
   7  -3   1 4630.44  165.98
  -7   3  -1 4617.84  187.38
  -7   3  -1 4576.64  167.68
  -7   3  -1 4382.06  167.68
   8  -4   1  135.69    7.30
   8  -4   1  137.89    7.30
  -8   4  -1  136.59    6.80
  -8   4  -1  133.69    7.40
  -8   4  -1  131.59    6.90
   9  -5   1   56.09    4.30
   9  -5   1   55.19    4.80
   9  -5   1   54.09    4.40
  -9   5  -1   56.59    4.70
  -9   5  -1   53.69    4.70
  -9   5  -1   55.89    5.20
  10  -6   1  203.08   10.20
  10  -6   1  206.48    9.60
  10  -6   1  205.08   10.50
 -10   6  -1  212.58    9.90
 -10   6  -1  207.98    9.90
 -10   6  -1  199.88   10.50
  11  -7   1  124.59    8.50
  11  -7   1  130.49    7.30
 -11   7  -1  118.89    7.60
 -11   7  -1  115.69    7.90
 -11   7  -1  131.49    7.70
  12  -8   1   -2.70    3.90
  12  -8   1   -1.60    3.00
 -12   8  -1   -2.40    3.40
 -12   8  -1   -0.10    3.60
 -12   8  -1   -3.50    3.10
  13  -9   1   -3.70    4.70
 -13   9  -1   -3.50    3.80
 -13   9  -1   -1.10    3.50
  14 -10   1   76.49    7.20
 -14  10  -1   92.69    7.40
 -14  10  -1   69.69    6.60
  15 -11   1   -6.50    5.70
 -15  11  -1    1.80    4.60
 -15  11  -1    3.10    4.50
  16 -12   1   -3.10    5.80
 -16  12  -1    0.10    4.90
 -16  12  -1   -0.70    4.60
  17 -13   1   -0.20    6.20
 -17  13  -1    0.50    5.20
 -17  13  -1   -1.70    5.10
 -14  16   2   43.00    6.40
 -14  16   2   37.90    6.40
  14 -16  -2   43.20    7.20
 -13  15   2    5.70    4.80
 -13  15   2   -6.00    4.80
  13 -15  -2   -2.80    5.30
 -12  14   2    5.60    4.70
 -12  14   2    1.80    4.90
  12 -14  -2    9.20    4.90
 -11  13   2   20.80    4.40
 -11  13   2   22.20    5.00
  11 -13  -2   28.50    5.10
 -10  12   2  175.18    9.60
 -10  12   2  181.28   10.40
 -10  12   2  188.88   10.30
  10 -12  -2  187.88   10.80
  -9  11   2    4.30    3.90
  -9  11   2    4.00    2.90
  -9  11   2    2.90    3.30
   9 -11  -2    1.40    3.60
  -8  10   2   27.90    3.30
  -8  10   2   24.60    3.80
  -8  10   2   17.70    3.20
   8 -10  -2   25.40    3.80
   8 -10  -2   20.70    3.20
  -7   9   2  130.59    7.30
  -7   9   2  117.09    6.70
  -7   9   2  133.99    6.80
   7  -9  -2  126.89    6.90
   7  -9  -2  122.29    6.40
   7  -9  -2  135.09    7.20
  -6   8   2  210.88    9.40
  -6   8   2  226.18    9.40
  -6   8   2  208.98    9.70
   6  -8  -2  215.18    9.20
   6  -8  -2  220.48    9.60
   6  -8  -2  199.18    9.40
  -5   7   2  183.78    8.50
  -5   7   2  182.08    8.10
  -5   7   2  189.08    8.10
   5  -7  -2  181.08    8.40
   5  -7  -2  193.28    8.30
   5  -7  -2  185.68    8.00
  -4   6   2   19.90    2.00
  -4   6   2   14.50    1.70
   4  -6  -2   21.00    2.30
  -3   5   2  271.97   10.30
  -3   5   2  258.77   10.30
  -3   5   2  240.38   10.50
   3  -5  -2  261.97   10.50
   3  -5  -2  265.07   10.20
   3  -5  -2  261.17   10.30
  -2   4   2  142.59    6.00
  -2   4   2  141.99    5.90
  -2   4   2  141.19    6.40
   2  -4  -2  142.79    6.30
   2  -4  -2  145.89    6.10
   2  -4  -2  145.29    5.90
  -1   3   2 1487.95   52.99
  -1   3   2 1405.16   52.69
  -1   3   2 1418.16   52.99
   1  -3  -2 1409.16   52.89
   1  -3  -2 1458.25   52.99
   1  -3  -2 1406.36   52.69
   0   2   2  137.89    5.50
   0   2   2  132.69    5.80
   0   2   2  133.09    5.50
   0   2   2  136.19    6.00
   0  -2  -2  132.19    5.50
   0  -2  -2  138.49    5.50
   0  -2  -2  140.69    6.00
   1   1   2  743.23   26.90
  -1  -1  -2  700.93   28.80
  -1  -1  -2  741.93   26.90
  -1  -1  -2  689.43   26.80
   2   0   2  420.56   15.90
   2   0   2  410.96   15.90
  -2   0  -2  417.56   15.90
   3  -1   2  367.26   14.30
   3  -1   2  368.26   14.30
  -3   1  -2  378.76   15.40
  -3   1  -2  349.07   14.20
   4  -2   2  800.32   30.90
   4  -2   2  820.32   30.90
  -4   2  -2  841.72   30.90
  -4   2  -2  826.42   30.90
  -4   2  -2  799.02   33.00
   5  -3   2    5.20    2.00
   5  -3   2    4.50    2.30
  -5   3  -2   -0.50    1.70
  -5   3  -2    1.30    1.70
  -5   3  -2   -0.10    2.20
   6  -4   2 1800.52   67.19
   6  -4   2 1771.42   67.19
  -6   4  -2 1786.42   74.59
  -6   4  -2 1771.32   67.09
  -6   4  -2 1789.12   67.09
  -6   4  -2 1849.31   71.79
   7  -5   2   55.19    4.90
   7  -5   2   43.10    4.20
   7  -5   2   39.50    3.90
  -7   5  -2   43.90    3.70
  -7   5  -2   35.40    3.30
  -7   5  -2   44.30    3.70
   8  -6   2    0.60    3.20
   8  -6   2    1.00    2.60
   8  -6   2   -0.80    2.50
  -8   6  -2    0.10    2.30
  -8   6  -2   -1.60    2.70
  -8   6  -2    2.10    2.20
  -8   6  -2    2.10    2.40
   9  -7   2   43.20    4.60
   9  -7   2   43.50    4.10
  -9   7  -2   34.00    4.00
  -9   7  -2   39.70    4.30
  -9   7  -2   40.70    4.00
  -9   7  -2   40.20    4.20
  10  -8   2  331.87   14.40
  10  -8   2  350.16   15.40
 -10   8  -2  323.87   15.60
 -10   8  -2  333.87   15.30
 -10   8  -2  316.67   14.70
  11  -9   2    1.80    5.00
 -11   9  -2   -0.30    3.60
 -11   9  -2   -3.20    3.70
  12 -10   2   32.10    5.70
 -12  10  -2   30.70    5.00
 -12  10  -2   27.40    4.70
  13 -11   2   12.60    5.50
 -13  11  -2   15.90    4.80
 -13  11  -2   13.00    4.70
  14 -12   2   14.20    5.80
 -14  12  -2   13.70    4.80
 -14  12  -2    6.90    4.80
  15 -13   2    5.60    6.20
 -15  13  -2    8.80    5.00
 -15  13  -2   12.40    5.70
 -16  16   3    1.70    5.30
 -16  16   3    4.60    5.50
 -16  16   3   -1.30    6.30
 -15  15   3   25.50    5.70
 -15  15   3   21.90    5.60
  15 -15  -3   24.30    6.30
 -14  14   3   18.90    5.00
 -14  14   3   16.00    5.30
  14 -14  -3   25.80    5.90
 -13  13   3   21.40    4.60
 -13  13   3   23.10    5.00
  13 -13  -3   24.90    5.40
 -12  12   3   74.09    6.10
 -12  12   3   64.79    5.40
 -12  12   3   77.39    6.20
  12 -12  -3   70.79    6.20
 -11  11   3   39.50    4.90
 -11  11   3   41.70    4.20
 -11  11   3   46.70    4.60
  11 -11  -3   47.30    4.80
 -10  10   3   64.09    5.20
 -10  10   3   70.79    5.90
 -10  10   3   70.39    5.70
  10 -10  -3   72.79    6.50
  10 -10  -3   68.49    5.90
  -9   9   3  144.89    7.90
  -9   9   3  136.49    7.60
  -9   9   3  140.19    7.40
   9  -9  -3  146.99    7.50
   9  -9  -3  138.49    8.00
   9  -9  -3  139.99    7.10
  -8   8   3    2.30    2.10
  -8   8   3    7.60    2.70
  -8   8   3    2.00    2.10
   8  -8  -3    2.80    1.80
   8  -8  -3    1.80    2.60
   8  -8  -3    7.70    2.40
  -7   7   3  292.67   11.50
  -7   7   3  255.47   11.10
  -7   7   3  277.87   11.10
   7  -7  -3  252.97   11.00
   7  -7  -3  278.27   11.30
   7  -7  -3  265.57   11.30
  -6   6   3  112.99    5.30
  -6   6   3  102.29    5.20
  -6   6   3  103.99    5.60
   6  -6  -3  114.29    5.50
   6  -6  -3  110.59    5.20
  -5   5   3  124.39    6.10
  -5   5   3  134.59    5.70
  -5   5   3  127.99    5.70
   5  -5  -3  129.49    6.00
   5  -5  -3  137.39    5.70
   5  -5  -3  126.89    5.80
  -4   4   3   35.20    3.20
  -4   4   3   35.10    2.50
  -4   4   3   38.40    2.60
   4  -4  -3   37.50    2.40
   4  -4  -3   35.80    2.70
   4  -4  -3   34.70    3.00
  -2   2   3 4201.68  166.58
  -2   2   3 4223.78  154.08
  -1   1   3    5.20    1.50
   1  -1  -3    5.10    1.50
   0   0   3    0.40    1.30
   0   0   3    0.10    1.80
   0   0   3    0.60    1.10
   0   0  -3   -0.40    1.10
   0   0  -3   -1.30    1.10
   0   0  -3   -1.30    1.60
   1  -1   3  609.54   23.10
   1  -1   3  593.14   24.80
   1  -1   3  622.94   23.10
  -1   1  -3  604.14   24.70
  -1   1  -3  625.74   23.00
  -1   1  -3  606.44   23.00
   2  -2   3   36.00    3.20
   2  -2   3   35.30    2.70
   2  -2   3   36.50    2.70
  -2   2  -3   33.80    2.80
  -2   2  -3   29.90    2.40
   3  -3   3  256.97   10.60
   3  -3   3  253.87   10.60
  -3   3  -3  259.17   10.40
  -3   3  -3  255.17   11.20
  -3   3  -3  248.88   10.50
   4  -4   3  388.76   16.00
   4  -4   3  405.16   16.00
  -4   4  -3  394.36   15.80
  -4   4  -3  388.06   15.90
  -4   4  -3  415.26   16.90
   5  -5   3   -1.20    2.50
   5  -5   3   -2.40    2.50
   5  -5   3   -1.50    2.70
  -5   5  -3   -2.00    2.30
  -5   5  -3   -2.60    1.70
  -5   5  -3   -0.30    2.00
   6  -6   3  108.49    7.10
   6  -6   3  113.19    6.60
   6  -6   3  121.89    6.80
  -6   6  -3  111.99    6.40
  -6   6  -3  115.69    6.60
  -6   6  -3  108.69    6.60
   7  -7   3   11.00    3.10
   7  -7   3    6.30    3.00
   7  -7   3   10.40    3.50
  -7   7  -3    3.60    2.80
  -7   7  -3    8.50    2.70
  -7   7  -3   12.10    2.80
   8  -8   3   51.19    5.20
   8  -8   3   48.80    4.50
  -8   8  -3   43.20    4.40
  -8   8  -3   54.69    4.60
   9  -9   3   52.59    5.80
  -9   9  -3   45.10    5.20
  -9   9  -3   43.60    4.70
  -9   9  -3   52.39    5.00
  10 -10   3   46.40    5.90
 -10  10  -3   53.69    5.20
 -10  10  -3   45.80    5.20
  11 -11   3   44.90    6.10
 -11  11  -3   35.60    4.90
 -11  11  -3   34.20    5.10
  12 -12   3    7.60    5.90
 -12  12  -3    6.40    4.70
 -12  12  -3   13.90    4.60
  13 -13   3    1.20    6.10
 -13  13  -3    5.80    4.90
 -13  13  -3    6.00    4.60
  14 -14   3   -6.70    5.90
 -14  14  -3    3.40    5.10
 -17  15   4   19.00    5.50
 -17  15   4    7.60    5.40
 -17  15   4   14.70    6.60
 -16  14   4    1.00    6.20
 -16  14   4    2.60    4.80
 -16  14   4   -4.50    4.80
  16 -14  -4   -2.90    5.20
 -15  13   4   52.79    6.00
 -15  13   4   57.79    6.00
  15 -13  -4   54.09    6.30
 -14  12   4   -2.60    3.80
 -14  12   4    3.80    3.40
 -14  12   4   -2.60    4.10
  14 -12  -4    9.80    4.50
 -13  11   4   20.00    4.00
 -13  11   4   20.00    4.20
 -13  11   4   12.50    3.50
  13 -11  -4   15.30    4.50
 -12  10   4    1.10    3.50
 -12  10   4    1.20    3.10
 -12  10   4    2.80    2.80
  12 -10  -4   -3.50    3.60
  12 -10  -4   -2.80    2.80
 -11   9   4  147.99    8.10
 -11   9   4  143.19    8.20
 -11   9   4  147.89    7.80
  11  -9  -4  160.48    8.60
  11  -9  -4  147.09    7.90
 -10   8   4  106.49    6.40
 -10   8   4  101.99    6.10
 -10   8   4  113.29    6.60
  10  -8  -4  111.19    6.80
  10  -8  -4   98.39    6.00
  10  -8  -4  112.89    6.20
  -9   7   4   81.49    5.10
  -9   7   4   81.59    4.90
  -9   7   4   81.39    5.40
   9  -7  -4   77.09    4.80
   9  -7  -4   69.79    5.30
   9  -7  -4   76.99    5.00
  -8   6   4   -0.50    2.10
  -8   6   4    2.10    1.80
  -8   6   4   -1.10    1.70
   8  -6  -4   -1.30    1.70
   8  -6  -4    0.30    0.90
   8  -6  -4    3.90    2.00
  -7   5   4   17.40    1.90
  -7   5   4   12.90    1.70
  -7   5   4   13.70    2.20
   7  -5  -4   15.60    2.00
   7  -5  -4   18.10    2.00
  -6   4   4  198.08    8.00
  -6   4   4  199.88    8.30
  -6   4   4  197.98    8.00
   6  -4  -4  193.48    8.10
   6  -4  -4  195.98    8.30
   6  -4  -4  214.38    8.00
  -5   3   4  528.85   20.00
   5  -3  -4  529.15   19.90
  -4   2   4 4429.56  162.08
  -2   0   4    4.30    1.60
  -2   0   4    3.10    1.10
  -2   0   4    3.60    1.80
  -2   0   4    2.90    1.10
   2   0  -4    1.90    1.00
  -1  -1   4  144.39    7.00
  -1  -1   4  149.79    6.20
  -1  -1   4  142.59    6.20
   1   1  -4  145.99    6.20
   1   1  -4  149.69    6.10
   0  -2   4  128.39    6.00
   0  -2   4  130.09    6.80
   0  -2   4  131.69    6.00
   0   2  -4  133.49    6.50
   0   2  -4  138.59    5.80
   0   2  -4  135.99    5.90
   1  -3   4  269.57   12.10
   1  -3   4  268.07   11.20
   1  -3   4  285.17   11.20
  -1   3  -4  282.47   11.20
  -1   3  -4  273.57   11.90
   2  -4   4  311.57   13.70
   2  -4   4  316.37   12.80
   2  -4   4  316.37   12.80
   2  -4   4  306.57   12.70
  -2   4  -4  308.27   12.50
  -2   4  -4  311.37   12.70
  -2   4  -4  315.27   13.40
   3  -5   4  552.34   22.10
   3  -5   4  561.34   22.10
   3  -5   4  590.04   22.10
  -3   5  -4  590.84   23.50
  -3   5  -4  543.45   22.10
  -3   5  -4  560.74   22.00
   4  -6   4   12.80    3.00
   4  -6   4   12.20    2.90
   4  -6   4    9.30    2.80
  -4   6  -4   10.30    2.70
  -4   6  -4   12.10    2.30
  -4   6  -4   13.70    2.80
   5  -7   4  137.49    8.40
   5  -7   4  162.48    8.10
   5  -7   4  159.58    8.10
  -5   7  -4  148.19    7.90
  -5   7  -4  135.89    7.50
  -5   7  -4  129.69    7.90
   6  -8   4   55.59    5.00
   6  -8   4   54.19    4.90
  -6   8  -4   60.29    4.90
  -6   8  -4   65.89    5.60
   7  -9   4  107.59    8.70
  -7   9  -4  109.89    7.40
  -7   9  -4  111.49    8.00
   8 -10   4   -2.60    4.20
  -8  10  -4    0.50    3.60
  -8  10  -4    2.60    3.20
   9 -11   4   86.49    7.40
  -9  11  -4   87.79    7.20
  10 -12   4   -8.50    5.00
 -10  12  -4   -1.10    4.20
 -10  12  -4    0.80    4.00
  11 -13   4   52.69    7.50
 -11  13  -4   56.59    6.80
 -11  13  -4   52.49    5.90
  12 -14   4   -0.70    5.90
 -12  14  -4   -2.30    4.90
 -19  15   5    7.70    7.00
 -18  14   5   17.90    5.20
 -18  14   5   14.40    6.90
 -18  14   5   18.40    5.30
 -17  13   5   42.10    7.20
 -17  13   5   34.20    5.40
 -17  13   5   30.60    5.30
  17 -13  -5   35.60    5.70
 -16  12   5    2.80    4.30
 -16  12   5    4.40    5.60
 -16  12   5    1.90    4.10
  16 -12  -5    1.10    4.50
 -15  11   5    7.10    3.90
 -15  11   5    2.80    5.40
 -15  11   5    1.90    3.30
 -15  11   5   -1.30    3.90
  15 -11  -5    2.40    4.20
 -14  10   5   86.79    7.00
 -14  10   5   93.69    7.20
 -14  10   5   96.49    7.50
  14 -10  -5   96.09    7.70
  14 -10  -5   78.59    6.50
 -13   9   5   12.20    3.10
 -13   9   5    7.20    3.30
 -13   9   5    6.80    2.80
  13  -9  -5    4.10    2.70
  13  -9  -5    8.30    3.40
 -12   8   5    1.30    2.90
 -12   8   5    0.70    2.50
 -12   8   5    2.30    2.50
  12  -8  -5    4.30    2.40
  12  -8  -5    8.50    3.20
 -11   7   5   89.69    5.60
 -11   7   5   95.19    5.60
 -11   7   5   66.99    5.50
  11  -7  -5   77.29    5.30
  11  -7  -5   90.29    5.20
 -10   6   5  723.93   26.80
 -10   6   5  717.93   27.00
 -10   6   5  709.53   26.90
  10  -6  -5  670.33   27.00
  10  -6  -5  709.73   26.90
  -9   5   5  118.89    5.70
  -9   5   5  116.79    6.00
  -9   5   5  121.99    5.80
   9  -5  -5  110.69    6.00
   9  -5  -5  125.39    5.60
   9  -5  -5  120.89    5.80
  -8   4   5  214.48    8.40
  -8   4   5  196.98    8.40
  -8   4   5  202.78    8.60
   8  -4  -5  223.18    8.40
   8  -4  -5  207.98    8.50
   8  -4  -5  199.28    8.50
  -7   3   5  160.68    6.90
  -6   2   5  716.83   27.50
  -6   2   5  757.92   31.40
  -5   1   5 1110.49   46.50
  -4   0   5    0.20    2.00
   4   0  -5   -2.40    1.70
  -3  -1   5   10.10    1.30
  -3  -1   5   13.10    2.20
   3   1  -5   12.20    1.30
  -2  -2   5  282.67   10.70
  -2  -2   5  268.37   11.70
  -2  -2   5  267.77   10.60
   2   2  -5  265.07   10.60
   2   2  -5  260.47   10.50
  -1  -3   5  323.87   12.70
  -1  -3   5  319.37   12.70
  -1  -3   5  320.57   13.80
   1   3  -5  325.67   13.60
   1   3  -5  320.47   12.70
   0  -4   5  124.09    6.10
   0  -4   5  132.89    6.90
   0  -4   5  115.89    6.20
   0   4  -5  127.39    6.10
   0   4  -5  124.89    6.30
   1  -5   5  167.58    8.50
   1  -5   5  155.28    7.60
   1  -5   5  158.68    7.90
   1  -5   5  150.58    7.70
  -1   5  -5  155.48    7.50
  -1   5  -5  168.98    7.80
  -1   5  -5  148.29    7.20
   2  -6   5  222.18   10.40
   2  -6   5  224.18   11.30
   2  -6   5  236.38   10.30
   2  -6   5  255.37   10.70
  -2   6  -5  227.38   10.30
  -2   6  -5  227.88   10.60
  -2   6  -5  226.48   10.00
   3  -7   5  352.26   15.40
   3  -7   5  372.26   15.30
   3  -7   5  376.46   15.30
  -3   7  -5  351.76   14.90
  -3   7  -5  371.66   15.30
  -3   7  -5  354.56   15.80
   4  -8   5   14.30    3.50
   4  -8   5    5.10    3.30
  -4   8  -5   12.30    3.00
  -4   8  -5    8.50    3.10
   5  -9   5   62.09    5.40
  -5   9  -5   50.29    4.80
  -5   9  -5   67.89    5.80
   6 -10   5  184.58   11.30
  -6  10  -5  187.08   10.60
  -6  10  -5  190.78   10.10
   7 -11   5   55.39    6.50
  -7  11  -5   43.00    5.70
   8 -12   5   -0.40    5.40
  -8  12  -5    0.90    4.20
   9 -13   5   -3.80    5.40
  -9  13  -5   -6.90    4.20
  10 -14   5   42.90    7.50
 -10  14  -5   47.10    6.70
  11 -15   5   -1.60    6.60
 -11  15  -5   -2.60    5.70
 -20  14   6    0.90    6.70
 -19  13   6    3.00    4.60
 -19  13   6    1.10    4.50
 -19  13   6   -3.30    6.30
 -18  12   6   75.79    6.50
 -18  12   6   85.39    9.00
 -18  12   6   80.49    6.70
  18 -12  -6   80.29    7.00
 -17  11   6   13.70    4.10
 -17  11   6   11.30    6.00
 -17  11   6   13.20    4.20
  17 -11  -6   15.40    4.60
 -16  10   6    3.80    5.30
 -16  10   6    3.20    3.50
 -16  10   6    2.00    3.30
 -16  10   6    7.70    3.70
  16 -10  -6    2.80    2.80
  16 -10  -6    4.80    4.00
 -15   9   6    7.90    3.30
 -15   9   6    2.50    3.20
 -15   9   6    9.90    3.50
 -15   9   6    5.60    5.00
  15  -9  -6   12.70    3.80
  15  -9  -6    6.90    2.70
 -14   8   6  259.77   11.90
 -14   8   6  287.67   12.20
 -14   8   6  274.17   12.10
 -14   8   6  276.57   15.00
  14  -8  -6  282.37   12.40
  14  -8  -6  267.07   11.60
 -13   7   6   51.09    4.00
 -13   7   6   59.39    5.10
 -13   7   6   69.09    6.40
 -13   7   6   54.39    5.00
  13  -7  -6   61.19    4.80
  13  -7  -6   47.30    3.80
  13  -7  -6   65.69    5.80
 -12   6   6   48.20    4.30
 -12   6   6   42.80    3.30
 -12   6   6   43.50    5.30
 -12   6   6   41.30    3.30
  12  -6  -6   43.20    3.60
  12  -6  -6   38.60    3.20
 -11   5   6  216.98    9.00
 -11   5   6  222.08   11.40
 -11   5   6  209.88    9.00
  11  -5  -6  215.68    9.00
  11  -5  -6  203.98    8.90
  11  -5  -6  208.78    9.30
 -10   4   6  126.09    5.70
 -10   4   6  117.79    7.50
 -10   4   6  112.79    5.60
  10  -4  -6  109.89    5.70
  10  -4  -6  104.79    5.50
  -9   3   6  490.65   18.70
  -9   3   6  497.95   21.80
  -9   3   6  489.05   18.70
  -8   2   6    7.10    1.70
  -8   2   6    8.90    2.80
  -7   1   6  211.08   10.30
  -6   0   6    0.50    2.20
   6   0  -6    0.90    2.00
  -5  -1   6  696.13   25.80
  -5  -1   6  674.93   29.20
  -5  -1   6  694.03   25.80
   5   1  -6  704.93   25.80
   5   1  -6  685.93   29.20
   5   1  -6  674.83   25.70
  -4  -2   6    7.70    1.40
   4   2  -6    8.40    1.90
   4   2  -6    8.80    1.40
  -3  -3   6  374.16   16.20
  -3  -3   6  385.96   14.80
  -3  -3   6  385.76   14.90
   3   3  -6  377.96   14.90
  -2  -4   6  556.94   23.50
  -2  -4   6  550.64   21.80
  -2  -4   6  580.44   21.80
   2   4  -6  569.34   21.70
   2   4  -6  582.14   21.90
  -1  -5   6   91.99    6.00
  -1  -5   6   95.59    5.30
  -1  -5   6   83.49    5.50
   1   5  -6   91.29    5.60
   0  -6   6   -0.60    2.30
   0  -6   6   -4.10    2.10
   0  -6   6   -5.70    2.90
   0  -6   6   -3.90    2.60
   0   6  -6   -3.30    2.30
   0   6  -6   -4.50    2.10
   0   6  -6   -3.50    1.70
   1  -7   6  215.28   10.80
   1  -7   6  230.48   10.40
   1  -7   6  231.08   10.90
   1  -7   6  242.48   11.60
  -1   7  -6  229.18   10.20
  -1   7  -6  227.78   10.60
  -1   7  -6  248.48   10.90
   2  -8   6  318.17   14.40
   2  -8   6  321.87   14.10
   2  -8   6  353.46   15.50
  -2   8  -6  327.67   14.30
  -2   8  -6  333.97   14.60
   3  -9   6   -0.10    3.50
  -3   9  -6    6.80    2.70
  -3   9  -6    5.80    3.30
   4 -10   6   75.49    6.00
  -4  10  -6   75.49    6.40
  -4  10  -6   76.09    6.00
   5 -11   6  -10.90    4.30
  -5  11  -6   -4.20    3.70
   6 -12   6   76.09    7.00
  -6  12  -6   76.79    6.90
   7 -13   6   -1.70    5.30
  -7  13  -6   -0.20    4.70
   8 -14   6    1.30    5.50
  -8  14  -6    1.90    4.90
   9 -15   6    8.40    6.30
  -9  15  -6    5.30    5.30
 -21  13   7   -1.50    7.10
 -20  12   7    0.10    4.20
 -20  12   7   -2.30    6.40
 -19  11   7   46.70    7.70
 -19  11   7   56.19    5.50
 -18  10   7   -3.70    3.70
 -18  10   7    8.40    6.00
  18 -10  -7   -4.00    3.10
  18 -10  -7    6.70    4.30
 -17   9   7   41.00    4.30
 -17   9   7   45.80    6.90
 -17   9   7   47.30    4.60
  17  -9  -7   43.30    4.10
  17  -9  -7   46.50    5.10
 -16   8   7   18.10    3.50
 -16   8   7    9.30    5.10
 -16   8   7   20.70    3.40
  16  -8  -7   20.30    3.20
  16  -8  -7   17.00    3.90
 -15   7   7  176.28   11.70
 -15   7   7  172.98    8.60
 -15   7   7  196.18    9.00
  15  -7  -7  172.68    8.40
  15  -7  -7  176.78    9.20
 -14   6   7   30.90    5.40
 -14   6   7   33.80    3.20
 -14   6   7   30.60    3.40
  14  -6  -7   33.20    3.70
  14  -6  -7   28.00    3.20
 -13   5   7   48.60    5.30
 -13   5   7   53.89    4.60
 -13   5   7   46.30    4.10
  13  -5  -7   52.09    4.40
  13  -5  -7   53.69    3.90
 -12   4   7  146.49    6.40
 -12   4   7  161.98    9.10
 -12   4   7  149.59    6.70
  12  -4  -7  130.19    6.70
  12  -4  -7  121.99    6.40
 -11   3   7  162.08    9.10
 -11   3   7  140.19    6.60
 -11   3   7  148.39    6.50
  11  -3  -7  134.69    6.30
  11  -3  -7  152.18    6.50
 -10   2   7  100.09    5.00
 -10   2   7  111.39    7.30
 -10   2   7   99.99    5.00
  -9   1   7   66.89    5.70
   9  -1  -7   72.69    5.40
   8   0  -7    1.70    1.40
  -7  -1   7  670.03   25.00
  -7  -1   7  646.94   28.60
  -7  -1   7  671.63   25.00
   7   1  -7  677.33   25.00
   7   1  -7  664.63   28.60
   7   1  -7  666.13   25.00
  -6  -2   7  828.62   31.50
  -6  -2   7  850.91   31.50
   6   2  -7  844.22   31.50
   6   2  -7  836.32   35.50
  -5  -3   7  691.13   25.40
  -5  -3   7  666.83   25.40
   5   3  -7  675.73   25.40
   5   3  -7  658.23   25.40
   5   3  -7  659.83   28.50
  -4  -4   7   32.30    2.80
  -4  -4   7   35.60    2.70
  -4  -4   7   25.30    3.30
   4   4  -7   29.60    2.50
   4   4  -7   33.00    2.90
   4   4  -7   34.20    2.70
  -3  -5   7   49.30    4.50
  -3  -5   7   51.09    4.10
  -3  -5   7   47.00    4.10
  -3  -5   7   46.80    4.10
   3   5  -7   56.39    4.50
   3   5  -7   49.99    3.80
  -2  -6   7  925.91   36.80
  -2  -6   7  934.71   39.40
  -2  -6   7 1018.90   36.90
  -2  -6   7  980.10   36.80
   2   6  -7  972.70   36.80
  -1  -7   7    4.90    3.20
  -1  -7   7    0.70    2.70
  -1  -7   7    1.00    0.70
  -1  -7   7   -2.40    2.50
   1   7  -7   -0.90    1.40
   1   7  -7   -5.10    2.50
   0  -8   7    5.20    2.50
   0  -8   7    0.00    3.30
   0  -8   7   -3.90    3.50
   0   8  -7   -1.00    3.00
   1  -9   7   -1.90    4.10
   1  -9   7    0.20    3.80
   1  -9   7    3.90    3.20
  -1   9  -7    5.00    3.30
   2 -10   7   99.99    8.60
   2 -10   7   98.39    8.40
  -2  10  -7   93.79    7.90
   3 -11   7   77.89    6.50
  -3  11  -7   90.89    8.10
   4 -12   7    1.70    4.50
  -4  12  -7    2.50    3.90
   5 -13   7   35.50    6.00
  -5  13  -7   41.70    6.00
   6 -14   7    9.50    6.30
  -6  14  -7    0.80    4.70
   7 -15   7   26.40    6.40
  -7  15  -7   27.40    6.20
 -22  12   8    1.60    7.00
 -21  11   8    5.20    4.30
 -21  11   8    9.30    6.90
 -20  10   8    8.10    6.50
 -20  10   8    3.30    3.80
 -19   9   8   47.50    7.50
 -19   9   8   29.10    4.10
  19  -9  -8   43.50    5.20
 -18   8   8   13.00    5.80
 -18   8   8    7.20    3.50
  18  -8  -8   11.30    4.10
 -17   7   8    7.70    5.60
 -17   7   8   23.10    3.70
  17  -7  -8   19.30    4.10
 -16   6   8   36.50    3.80
 -16   6   8   37.70    5.90
  16  -6  -8   39.20    4.20
 -15   5   8  611.34   23.10
 -15   5   8  634.44   27.10
  15  -5  -8  541.55   22.80
  15  -5  -8  576.74   23.10
 -14   4   8  233.78   13.00
 -14   4   8  233.38   10.20
  14  -4  -8  234.58    9.80
  14  -4  -8  226.98   10.10
 -13   3   8   58.29    4.60
 -13   3   8   68.29    7.00
 -13   3   8   65.19    4.70
  13  -3  -8   70.69    4.20
  13  -3  -8   70.19    4.60
 -12   2   8    1.20    3.20
 -12   2   8   -1.20    1.90
 -12   2   8   -4.40    1.90
  12  -2  -8    1.40    1.40
 -11   1   8   69.99    6.20
 -11   1   8   50.09    3.80
 -11   1   8   41.90    3.90
  11  -1  -8   54.29    5.30
 -10   0   8  432.96   17.10
 -10   0   8  452.45   20.20
 -10   0   8  438.56   17.10
  10   0  -8  456.65   20.10
  -9  -1   8   -4.50    3.00
  -9  -1   8   -2.40    1.70
  -9  -1   8   -0.50    1.80
   9   1  -8   -4.60    1.40
   9   1  -8   -5.70    2.80
  -8  -2   8   76.49    4.40
  -8  -2   8   71.99    6.10
  -8  -2   8   77.19    4.30
   8   2  -8   76.89    4.20
   8   2  -8   76.79    4.20
  -7  -3   8   10.10    2.00
  -7  -3   8    4.60    2.00
   7   3  -8    5.60    1.90
   7   3  -8    5.00    1.70
   7   3  -8   -1.50    1.80
  -6  -4   8  839.22   31.70
  -6  -4   8  839.12   31.60
   6   4  -8  846.92   31.70
   6   4  -8  823.42   31.50
   6   4  -8  824.82   35.50
  -5  -5   8    8.00    3.00
  -5  -5   8    3.30    2.70
  -5  -5   8    5.70    2.20
  -5  -5   8    7.80    2.40
   5   5  -8    6.70    2.10
   5   5  -8    2.80    2.20
   5   5  -8   10.90    2.10
  -4  -6   8  294.77   13.10
  -4  -6   8  294.27   14.00
  -4  -6   8  293.57   12.90
  -4  -6   8  321.17   12.80
   4   6  -8  311.87   12.70
   4   6  -8  322.17   13.00
  -3  -7   8  188.68    8.70
  -3  -7   8  186.28    9.70
  -3  -7   8  163.98    8.90
  -3  -7   8  184.98    9.10
   3   7  -8  203.48    9.10
   3   7  -8  155.38    8.00
  -2  -8   8   67.59    5.20
  -2  -8   8   69.49    5.40
  -2  -8   8   74.79    5.60
   2   8  -8   63.49    5.00
  -1  -9   8   33.80    4.80
  -1  -9   8   43.10    4.00
  -1  -9   8   38.50    4.40
   1   9  -8   49.50    4.60
   0 -10   8   14.00    4.20
   0 -10   8    9.40    4.50
   0  10  -8   12.60    4.00
   1 -11   8   13.70    4.70
   1 -11   8   20.90    5.10
  -1  11  -8   21.20    4.40
   2 -12   8   20.50    5.10
  -2  12  -8   26.90    4.70
   3 -13   8   59.29    7.10
  -3  13  -8   44.10    5.90
   4 -14   8   -4.60    5.60
  -4  14  -8   -7.90    4.70
   5 -15   8   21.30    6.60
  -5  15  -8   14.80    5.20
 -23  11   9   15.50    8.20
 -22  10   9   16.90    7.70
 -21   9   9   17.30    7.30
 -20   8   9  -10.20    6.40
  20  -8  -9    3.20    4.10
 -19   7   9    0.20    6.00
 -19   7   9    3.60    3.50
  19  -7  -9    6.70    3.90
 -18   6   9  110.29    7.50
 -18   6   9  117.59   11.20
  18  -6  -9  109.29    7.80
 -17   5   9   13.90    5.60
 -17   5   9   15.20    3.30
  17  -5  -9   17.50    3.30
 -16   4   9   15.50    4.90
 -16   4   9   15.30    2.90
  16  -4  -9   15.10    2.40
 -15   3   9   25.40    4.70
 -15   3   9   26.80    3.10
 -15   3   9   22.30    3.10
  15  -3  -9   22.00    2.60
  15  -3  -9   24.50    2.80
 -14   2   9  303.17   12.50
 -14   2   9  328.27   15.40
 -14   2   9  287.27   12.40
  14  -2  -9  325.27   12.30
  14  -2  -9  282.27   12.20
 -13   1   9   44.80    3.30
 -13   1   9   44.30    4.90
 -13   1   9   35.70    3.00
  13  -1  -9   36.10    4.30
  13  -1  -9   46.80    3.70
 -12   0   9    3.70    2.00
 -12   0   9   -0.70    2.00
 -12   0   9   -1.40    3.50
  12   0  -9    5.10    3.10
  12   0  -9    1.80    1.60
 -11  -1   9  143.39    9.10
 -11  -1   9  130.29    6.70
 -11  -1   9  145.69    6.60
  11   1  -9  144.99    6.70
  11   1  -9  150.48    6.40
  11   1  -9  141.49    8.40
 -10  -2   9  213.08    9.30
 -10  -2   9  232.28    9.30
 -10  -2   9  215.28   11.50
  10   2  -9  211.98   11.20
  10   2  -9  223.88    9.10
  10   2  -9  223.58    9.20
  -9  -3   9  624.14   24.40
  -9  -3   9  631.54   24.40
   9   3  -9  641.64   27.80
   9   3  -9  649.64   24.30
   9   3  -9  642.64   24.30
  -8  -4   9  281.97   12.20
  -8  -4   9  308.27   12.20
   8   4  -9  309.37   12.20
   8   4  -9  285.97   13.90
   8   4  -9  300.47   12.10
  -7  -5   9    8.10    2.30
  -7  -5   9    5.10    2.60
  -7  -5   9    8.00    2.80
   7   5  -9    6.20    2.60
   7   5  -9    6.90    1.90
   7   5  -9    7.30    2.30
  -6  -6   9   85.79    5.90
  -6  -6   9   85.69    6.10
  -6  -6   9   86.09    5.30
  -6  -6   9   94.69    7.00
   6   6  -9   59.59    5.30
   6   6  -9   88.69    5.70
   6   6  -9   81.19    5.10
  -5  -7   9  264.07   11.70
  -5  -7   9  230.78   11.40
  -5  -7   9  252.97   11.10
  -5  -7   9  248.48   12.20
   5   7  -9  256.97   11.30
  -4  -8   9   -2.10    3.50
  -4  -8   9   -6.00    3.00
  -4  -8   9   -4.70    2.60
   4   8  -9   -4.10    2.90
  -3  -9   9   19.40    4.30
  -3  -9   9   20.80    4.10
  -3  -9   9   24.10    3.50
   3   9  -9   21.80    3.90
  -2 -10   9    5.90    4.10
  -2 -10   9   -1.30    4.20
   2  10  -9   -1.80    3.60
  -1 -11   9   17.60    4.90
  -1 -11   9    8.70    4.40
   1  11  -9   13.20    4.20
   0 -12   9   35.90    5.60
   0 -12   9   50.39    5.90
   0  12  -9   41.70    5.40
   1 -13   9    9.50    5.20
  -1  13  -9    6.40    4.60
   2 -14   9   41.10    7.00
  -2  14  -9   38.90    5.80
   3 -15   9    9.00    5.90
  -3  15  -9    8.40    5.00
   4 -16   9   -5.20    6.10
  -4  16  -9   -0.70    5.20
 -24  10  10    8.20    7.70
 -23   9  10    2.00    7.40
 -22   8  10   44.70    8.20
 -21   7  10   -5.30    6.40
 -20   6  10    7.30    3.80
 -20   6  10    7.20    3.80
 -20   6  10    3.10    5.80
  20  -6 -10    2.90    3.40
 -19   5  10    0.80    3.50
 -19   5  10   -3.10    3.30
 -19   5  10    0.00    5.50
  19  -5 -10   -2.30    3.10
 -18   4  10  164.98    8.60
 -18   4  10  146.69    8.80
 -18   4  10  179.68   12.20
  18  -4 -10  174.18    8.50
 -17   3  10   26.00    5.70
 -17   3  10   21.30    3.50
 -17   3  10   23.70    3.60
  17  -3 -10   22.30    2.90
  17  -3 -10   25.70    3.20
 -16   2  10   13.40    4.70
 -16   2  10   10.50    2.90
 -16   2  10    8.50    2.70
  16  -2 -10    6.70    2.40
  16  -2 -10    8.80    2.20
 -15   1  10   55.49    4.90
 -15   1  10   57.39    6.10
 -15   1  10   54.69    4.90
  15  -1 -10   54.19    4.30
 -14   0  10    0.00    2.30
 -14   0  10   -1.20    2.30
 -14   0  10   -2.80    3.50
  14   0 -10   -0.80    1.80
  14   0 -10    2.80    3.30
 -13  -1  10   21.60    4.40
 -13  -1  10   17.10    2.60
 -13  -1  10   15.50    2.70
  13   1 -10   26.40    3.80
  13   1 -10   20.80    2.50
  13   1 -10   19.20    2.20
 -12  -2  10   56.79    5.40
 -12  -2  10   44.80    4.20
 -12  -2  10   48.20    3.60
  12   2 -10   50.49    4.30
  12   2 -10   58.59    5.20
  12   2 -10   56.29    3.90
 -11  -3  10  148.99    7.50
 -11  -3  10  155.28    7.30
  11   3 -10  158.28    8.90
  11   3 -10  150.98    7.10
  11   3 -10  154.88    7.10
 -10  -4  10   10.40    2.40
 -10  -4  10    8.80    2.80
 -10  -4  10    7.30    2.60
  10   4 -10    7.30    3.00
  10   4 -10    8.40    2.10
  10   4 -10    9.50    2.20
  -9  -5  10   33.70    3.60
  -9  -5  10   29.10    3.00
  -9  -5  10   24.00    3.20
   9   5 -10   28.90    3.10
   9   5 -10   30.80    3.90
   9   5 -10   24.30    2.70
  -8  -6  10   53.09    4.30
  -8  -6  10   59.59    4.90
  -8  -6  10   46.40    4.40
   8   6 -10   59.09    5.20
   8   6 -10   56.89    4.90
  -7  -7  10  172.68    9.90
  -7  -7  10  167.48    8.30
  -7  -7  10  156.38    8.80
   7   7 -10  175.28    8.60
   7   7 -10  153.08    9.10
  -6  -8  10  144.49    7.90
  -6  -8  10  149.39    8.70
  -6  -8  10  142.69    9.40
   6   8 -10  163.48    8.60
  -5  -9  10   19.80    4.00
  -5  -9  10   17.90    3.60
  -5  -9  10   22.10    4.60
   5   9 -10   27.20    4.00
  -4 -10  10   12.90    4.20
  -4 -10  10   11.00    4.40
   4  10 -10   17.70    4.00
  -3 -11  10   23.90    5.00
  -3 -11  10   24.60    5.20
   3  11 -10   16.90    4.50
  -2 -12  10   34.60    5.60
  -2 -12  10   38.90    5.80
   2  12 -10   35.10    5.20
  -1 -13  10   11.40    5.20
  -1 -13  10    3.80    5.50
   1  13 -10    7.70    4.50
   0 -14  10    7.80    5.40
   0  14 -10   14.00    5.30
   1 -15  10    2.00    6.30
  -1  15 -10   -0.40    5.10
   2 -16  10   19.60    6.80
  -2  16 -10   19.10    5.80
 -25   9  11    9.20    8.30
 -25   9  11   14.10    5.40
 -24   8  11    9.40    4.70
 -24   8  11   -4.80    7.30
 -23   7  11    8.60    7.80
 -23   7  11   18.90    4.60
 -22   6  11   15.90    4.30
 -22   6  11   10.10    7.10
 -21   5  11   -3.00    6.10
 -21   5  11   12.30    3.90
  21  -5 -11    7.10    3.30
 -20   4  11    3.70    3.70
 -20   4  11   -0.80    5.60
 -20   4  11   -0.80    3.40
  20  -4 -11    1.80    3.10
 -19   3  11  185.58   10.00
 -19   3  11  205.18   10.10
 -19   3  11  211.38   13.70
  19  -3 -11  204.58    9.60
 -18   2  11   -9.60    3.10
 -18   2  11   -7.50    2.90
 -18   2  11   -0.80    5.00
  18  -2 -11   -8.60    2.60
 -17   1  11  228.18   10.50
 -17   1  11  253.97   13.90
 -17   1  11  216.88   10.60
  17  -1 -11  232.18   10.10
 -16   0  11   -3.80    2.70
 -16   0  11   -3.90    4.80
 -16   0  11   -1.80    2.70
  16   0 -11   -1.70    2.20
 -15  -1  11   55.49    4.70
 -15  -1  11   48.00    3.90
 -15  -1  11   58.39    6.20
  15   1 -11   48.00    4.10
  15   1 -11   47.60    3.70
 -14  -2  11   19.00    3.00
 -14  -2  11   22.10    4.80
 -14  -2  11   20.90    2.90
  14   2 -11   26.30    4.50
  14   2 -11   22.30    2.50
  14   2 -11   17.70    2.70
 -13  -3  11   47.20    3.60
 -13  -3  11   42.90    3.80
  13   3 -11   48.20    4.20
  13   3 -11   52.39    5.40
  13   3 -11   50.09    4.50
 -12  -4  11    3.90    2.60
 -12  -4  11   -1.90    2.60
 -12  -4  11    2.10    2.90
  12   4 -11    1.40    2.20
  12   4 -11    0.00    2.20
  12   4 -11    4.70    3.30
 -11  -5  11   87.39    5.80
 -11  -5  11   93.69    6.20
 -11  -5  11   75.99    6.20
  11   5 -11   86.29    7.00
  11   5 -11   90.79    5.70
 -10  -6  11  145.79    7.50
 -10  -6  11  133.39    8.20
 -10  -6  11  137.39    8.00
  10   6 -11  140.79    8.80
  10   6 -11  142.29    7.60
  -9  -7  11    6.90    2.80
  -9  -7  11    6.00    4.10
  -9  -7  11    0.10    3.30
   9   7 -11    4.30    2.90
   9   7 -11    4.20    3.30
  -8  -8  11   25.40    4.10
  -8  -8  11   14.80    3.30
  -8  -8  11   20.20    4.50
   8   8 -11   23.40    3.90
   8   8 -11   25.40    3.80
  -7  -9  11    2.80    4.30
  -7  -9  11    6.60    4.10
  -7  -9  11    1.30    3.00
   7   9 -11    2.80    3.50
  -6 -10  11   77.39    6.80
  -6 -10  11   70.39    6.00
   6  10 -11   81.39    6.20
  -5 -11  11   25.10    5.10
  -5 -11  11   18.70    4.90
   5  11 -11   22.80    4.60
  -4 -12  11    7.90    4.80
  -4 -12  11    0.70    4.80
   4  12 -11    3.60    4.30
  -3 -13  11   -4.20    4.90
  -3 -13  11   -0.30    5.00
   3  13 -11    2.60    4.80
  -2 -14  11   26.30    6.20
  -2 -14  11   33.50    6.10
   2  14 -11   28.90    5.50
  -1 -15  11   23.20    6.70
   1  15 -11    9.70    5.30
 -26   8  12    1.60    4.90
 -26   8  12    7.40    8.40
 -25   7  12   27.10    8.40
 -25   7  12   23.10    5.10
 -24   6  12   -4.90    7.20
 -24   6  12    4.70    4.30
 -23   5  12    5.80    7.70
 -23   5  12   14.80    4.40
 -22   4  12    8.00    3.90
 -22   4  12   -5.30    6.90
 -21   3  12   30.50    7.10
 -21   3  12   20.50    4.20
 -21   3  12   25.20    4.20
  21  -3 -12   33.10    3.80
 -20   2  12   16.90    3.60
 -20   2  12   20.40    6.80
 -20   2  12   18.30    3.80
  20  -2 -12   17.40    3.20
 -19   1  12   19.80    6.20
 -19   1  12   15.60    3.70
 -19   1  12   24.00    3.90
  19  -1 -12   14.90    3.10
 -18   0  12  548.95   21.40
 -18   0  12  551.34   25.90
 -18   0  12  541.15   21.40
  18   0 -12  504.05   20.90
 -17  -1  12   35.70    3.80
 -17  -1  12   43.90    6.70
 -17  -1  12   38.70    4.00
  17   1 -12   37.00    3.20
 -16  -2  12   19.80    3.20
 -16  -2  12   17.80    3.50
  16   2 -12   17.00    2.60
 -15  -3  12   -1.50    2.80
 -15  -3  12   -2.70    3.30
 -15  -3  12   -0.70    2.30
  15   3 -12   -0.40    2.20
 -14  -4  12  124.99    7.80
 -14  -4  12  148.09    7.40
 -14  -4  12  128.39    7.20
  14   4 -12  123.99    6.90
 -13  -5  12   20.50    3.50
 -13  -5  12   28.00    3.50
 -13  -5  12   16.90    3.60
  13   5 -12   19.10    2.90
  13   5 -12   23.50    4.30
 -12  -6  12   -0.20    3.30
 -12  -6  12    3.40    3.00
 -12  -6  12    2.70    2.90
  12   6 -12    1.50    2.70
  12   6 -12   -0.20    3.40
 -11  -7  12    7.70    3.80
 -11  -7  12    7.40    3.20
  11   7 -12   13.60    3.30
  11   7 -12   11.50    3.80
 -10  -8  12  195.18    9.70
 -10  -8  12  193.08   10.60
 -10  -8  12  176.98   11.60
  10   8 -12  181.28   10.80
  10   8 -12  196.48    9.90
  -9  -9  12   14.30    3.50
  -9  -9  12   11.40    4.70
  -9  -9  12   13.60    4.40
   9   9 -12   15.70    4.00
   9   9 -12   11.20    3.70
  -8 -10  12    2.50    4.40
  -8 -10  12    1.60    4.70
   8  10 -12    1.80    3.80
   8  10 -12   -1.40    3.50
  -7 -11  12   26.00    5.30
  -7 -11  12   32.00    5.60
   7  11 -12   35.60    5.20
  -6 -12  12    3.70    4.80
  -6 -12  12   11.20    5.20
   6  12 -12   14.80    4.90
  -5 -13  12    5.40    5.40
  -5 -13  12    8.10    5.10
   5  13 -12    5.20    4.90
  -4 -14  12    6.80    5.60
  -4 -14  12  -13.20    5.40
   4  14 -12   -4.20    4.60
  -3 -15  12   20.80    6.40
  -3 -15  12   11.80    6.00
   3  15 -12    7.60    5.30
 -27   7  13    5.70    5.10
 -27   7  13   -2.30    8.90
 -26   6  13   31.60    5.50
 -26   6  13   11.30    8.50
 -25   5  13    3.90    8.30
 -25   5  13   -0.50    4.30
 -24   4  13    5.20    7.70
 -24   4  13    2.10    4.20
 -23   3  13    7.40    7.40
 -23   3  13    3.10    4.10
 -22   2  13   19.30    4.20
 -22   2  13   20.00    7.20
 -21   1  13    3.30    3.60
 -21   1  13   -6.00    6.30
 -21   1  13   -0.40    3.70
  21  -1 -13   -2.00    2.90
 -20   0  13   -1.60    3.60
 -20   0  13    0.30    3.40
 -20   0  13    0.60    5.80
  20   0 -13   -0.40    2.50
 -19  -1  13   12.20    3.60
 -19  -1  13   15.70    3.90
 -19  -1  13    9.80    6.00
  19   1 -13   10.30    2.70
 -18  -2  13   93.89    6.60
 -18  -2  13   99.19    7.40
  18   2 -13   92.09    5.90
 -17  -3  13   16.80    3.10
 -17  -3  13   25.60    4.10
 -17  -3  13   21.10    3.50
  17   3 -13   22.90    3.00
 -16  -4  13   -3.00    2.70
 -16  -4  13   -5.00    2.90
 -16  -4  13   -8.90    3.50
  16   4 -13   -2.60    2.40
 -15  -5  13   43.00    4.20
 -15  -5  13   55.89    5.00
 -15  -5  13   51.89    4.50
  15   5 -13   50.49    4.10
 -14  -6  13   26.90    3.90
 -14  -6  13   18.70    4.20
 -14  -6  13   21.00    3.80
  14   6 -13   16.20    3.20
 -13  -7  13   10.00    4.10
 -13  -7  13   19.30    3.70
  13   7 -13   15.20    3.40
 -12  -8  13   -8.40    4.00
 -12  -8  13    4.40    3.30
  12   8 -13   -0.30    3.10
 -11  -9  13   67.29    7.00
 -11  -9  13   63.49    6.00
 -11  -9  13   59.59    5.20
  11   9 -13   72.49    5.60
 -10 -10  13    1.00    4.90
 -10 -10  13    5.00    4.60
  10  10 -13    6.90    3.80
  -9 -11  13   58.49    6.80
  -9 -11  13   75.09    6.60
   9  11 -13   65.09    6.20
  -8 -12  13   -1.10    4.90
  -8 -12  13    0.90    5.20
   8  12 -13   -4.00    4.10
  -7 -13  13   15.10    5.60
  -7 -13  13   13.00    5.50
   7  13 -13    9.80    5.00
  -6 -14  13    3.20    5.50
  -6 -14  13    2.60    5.60
   6  14 -13   -5.20    4.80
  -5 -15  13   12.20    6.20
  -5 -15  13   13.20    6.30
   5  15 -13   10.60    5.70
 -27   5  14    2.30    4.70
 -27   5  14   -2.10    8.80
 -26   4  14   17.20    4.90
 -26   4  14   17.60    8.70
 -25   3  14    1.60    4.40
 -25   3  14    2.00    8.10
 -24   2  14    4.30    7.60
 -24   2  14    6.00    4.30
 -23   1  14   -2.70    4.00
 -23   1  14   -0.80    7.20
 -22   0  14   25.10    7.40
 -22   0  14   24.60    4.40
 -21  -1  14   17.60    4.40
 -21  -1  14   32.20    7.40
  21   1 -14   15.90    3.10
 -20  -2  14   -3.80    3.50
 -20  -2  14   -1.90    3.80
  20   2 -14   -1.20    2.60
 -19  -3  14    7.00    3.60
 -19  -3  14    7.50    4.10
  19   3 -14    5.00    2.70
 -18  -4  14   11.80    3.60
 -18  -4  14   15.50    4.20
 -18  -4  14    9.30    2.90
  18   4 -14   11.00    2.90
 -17  -5  14   10.60    3.10
 -17  -5  14   10.60    3.50
 -17  -5  14   17.90    4.40
  17   5 -14   10.50    3.00
 -16  -6  14    1.20    4.00
 -16  -6  14    4.50    3.50
  16   6 -14    0.70    2.80
 -15  -7  14   16.30    3.90
 -15  -7  14   19.00    4.50
  15   7 -14   16.30    3.60
 -14  -8  14   13.80    3.80
 -14  -8  14   11.90    4.50
  14   8 -14   10.20    3.50
 -13  -9  14    7.30    4.80
 -13  -9  14   10.40    3.90
 -13  -9  14   13.80    5.40
  13   9 -14    9.60    3.70
 -12 -10  14    4.70    4.80
 -12 -10  14    8.00    5.30
  12  10 -14    5.20    3.90
 -11 -11  14   24.00    5.50
 -11 -11  14   26.30    6.20
  11  11 -14   18.50    4.60
 -10 -12  14   42.30    6.60
 -10 -12  14   28.20    5.90
  10  12 -14   24.20    5.00
  -9 -13  14    4.70    5.60
  -9 -13  14    6.30    5.90
   9  13 -14    3.80    4.90
  -8 -14  14   -0.70    5.80
  -8 -14  14    8.20    5.80
   8  14 -14    4.70    5.10
  -7 -15  14    1.20    6.40
  -7 -15  14    1.70    5.90
   7  15 -14   -8.30    5.30
 -28   4  15    7.30    4.90
 -28   4  15   -7.20    8.90
 -27   3  15   20.20    8.80
 -27   3  15    2.30    4.80
 -26   2  15    0.80    4.60
 -26   2  15    1.10    7.80
 -25   1  15    5.10    4.60
 -25   1  15    0.30    7.60
 -24   0  15   -5.00    7.30
 -24   0  15   -3.60    4.40
 -23  -1  15   14.40    4.60
 -22  -2  15    3.50    4.30
 -21  -3  15   18.10    4.60
 -20  -4  15    0.20    4.30
 -19  -5  15   21.90    3.50
 -19  -5  15   23.40    4.80
  19   5 -15   22.10    3.50
 -18  -6  15   17.50    4.70
  18   6 -15   15.80    3.40
 -17  -7  15   14.50    4.70
  17   7 -15   11.80    3.40
 -16  -8  15    5.90    4.70
  16   8 -15   -0.90    3.40
 -15  -9  15    2.10    4.90
  15   9 -15    7.90    3.60
 -14 -10  15   51.39    7.10
 -14 -10  15   57.99    6.60
  14  10 -15   46.20    5.40
 -13 -11  15   -0.60    5.20
 -13 -11  15    6.60    5.80
  13  11 -15    1.90    4.10
 -12 -12  15    7.80    5.60
 -12 -12  15    3.80    5.80
  12  12 -15   -0.40    4.60
 -11 -13  15    4.10    5.90
 -11 -13  15   -2.50    5.50
  11  13 -15   -6.10    4.50
 -10 -14  15   12.40    6.40
 -10 -14  15   10.10    6.40
  10  14 -15   11.30    5.50
 -28   2  16    0.10    8.70
 -28   2  16    3.50    4.90
 -27   1  16   15.30    5.00
 -27   1  16   17.40    9.10
 -26   0  16    0.00    4.70
 -25  -1  16   14.50    4.90
 -24  -2  16    3.80    4.50
 -23  -3  16    5.50    4.60
 -22  -4  16   44.50    5.50
 -21  -5  16    0.00    4.60
 -20  -6  16    6.80    4.90
 -19  -7  16   -4.80    4.70
 -18  -8  16   46.40    6.00
 -17  -9  16    3.70    5.10
 -16 -10  16    0.60    5.40
 -16 -10  16   -1.70    5.90
 -15 -11  16   -5.60    5.60
 -15 -11  16   -3.70    6.20
 -14 -12  16   10.80    6.50
 -14 -12  16   18.00    6.20
 -13 -13  16    0.00    5.80
 -13 -13  16    9.10    6.70
 -27  -1  17   -1.90    4.90
 -26  -2  17   15.20    5.00
 -25  -3  17    0.50    4.80
 -24  -4  17   -1.00    5.00
 -23  -5  17   -2.40    4.90
 -22  -6  17    5.90    5.20
 -21  -7  17   15.00    5.30
 -20  -8  17    3.10    5.20
 -19  -9  17   -3.70    5.40
 -18 -10  17    3.50    5.80
 -17 -11  17    5.20    5.90
 -17 -11  17   10.20    6.80
 -16 -12  17   -5.00    6.10
 -16 -12  17   -3.90    6.40
 -26  -4  18   10.80    5.40
 -25  -5  18    0.20    5.30
 -24  -6  18   -7.30    5.10
 -23  -7  18   -3.10    5.20
 -22  -8  18    0.30    5.50
 -21  -9  18    1.10    5.70
  21  13 -13   -3.40    4.60
 -21 -13  13   -0.30    6.00
  22  12 -13    2.30    4.80
 -22 -12  13    4.40    5.80
  23  11 -13    1.50    4.80
 -23 -11  13   -1.50    6.00
 -24 -10  13    7.00    5.90
 -25  -9  13   -1.30    5.50
 -26  -8  13   -5.20    5.70
 -27  -7  13    5.20    5.80
  17  15 -12    0.40    4.50
 -17 -15  12    0.90    6.30
  18  14 -12    1.50    4.40
 -18 -14  12   -2.90    5.60
  19  13 -12    3.90    4.50
 -19 -13  12    3.80    6.00
  20  12 -12   13.00    5.10
 -20 -12  12    4.90    6.00
  21  11 -12   11.70    4.80
 -21 -11  12   11.20    5.90
  22  10 -12   -7.80    4.40
 -22 -10  12   -2.00    5.40
  23   9 -12   21.90    5.00
 -23  -9  12   31.20    6.10
  24   8 -12   -2.10    4.30
 -24  -8  12   -0.90    5.20
  25   7 -12   13.60    5.00
 -25  -7  12   19.10    5.90
 -26  -6  12   10.60    5.60
 -27  -5  12   10.30    5.60
 -28  -4  12   10.70    5.50
  13  17 -11   -3.60    5.40
  14  16 -11   -4.00    5.00
 -14 -16  11    4.50    6.10
  15  15 -11   10.80    4.60
 -15 -15  11   10.40    5.90
  16  14 -11   -7.50    4.40
 -16 -14  11    4.50    5.50
  17  13 -11    3.60    4.20
 -17 -13  11   13.00    5.60
  18  12 -11   15.70    4.70
 -18 -12  11   29.80    5.90
  19  11 -11   26.70    5.00
 -19 -11  11   47.80    6.60
  20  10 -11   16.70    4.60
 -20 -10  11   15.00    5.40
  21   9 -11   25.40    4.90
 -21  -9  11   41.70    6.20
  22   8 -11   -2.50    3.90
 -22  -8  11   -5.80    4.80
  23   7 -11   13.50    4.50
 -23  -7  11    6.70    5.10
  24   6 -11   30.30    5.20
 -24  -6  11   30.50    5.80
  25   5 -11    4.00    4.70
 -25  -5  11    3.60    5.30
  26   4 -11   -3.20    4.40
 -26  -4  11    3.90    5.30
 -27  -3  11   -1.00    5.10
 -28  -2  11   26.60    5.90
 -29  -1  11    5.00    5.60
  11  17 -10   11.70    5.60
 -11 -17  10   13.40    6.40
  12  16 -10   -6.30    4.40
 -12 -16  10    5.10    5.00
 -12 -16  10   -1.20    5.60
  13  15 -10    4.30    4.90
 -13 -15  10    9.00    5.60
  14  14 -10    3.60    4.50
 -14 -14  10    0.10    5.10
  15  13 -10   33.10    5.10
 -15 -13  10   47.70    6.90
  16  12 -10   23.60    5.10
 -16 -12  10   18.40    5.40
  17  11 -10   -4.80    3.70
 -17 -11  10   -3.20    4.60
  18  10 -10    4.90    4.30
 -18 -10  10    6.70    4.90
 -18 -10  10    6.10    3.10
  19   9 -10   24.50    4.60
 -19  -9  10   32.70    5.60
  20   8 -10   55.59    5.60
 -20  -8  10   68.79    6.80
  21   7 -10    0.30    3.90
 -21  -7  10   -5.10    4.60
  22   6 -10   -4.10    4.00
 -22  -6  10   -6.10    4.50
  23   5 -10    2.30    4.50
 -23  -5  10    3.40    4.70
  24   4 -10   75.79    6.60
 -24  -4  10   81.59    7.10
  25   3 -10   13.30    4.70
 -25  -3  10   13.40    5.30
  26   2 -10    4.10    4.60
 -26  -2  10    8.10    5.10
 -27  -1  10    2.10    5.10
 -28   0  10    4.20    5.30
   8  18  -9    3.50    5.20
  -8 -18   9    0.00    6.20
   9  17  -9    0.30    4.80
  -9 -17   9   -0.50    5.70
  10  16  -9    0.90    5.00
 -10 -16   9   -7.10    5.20
 -10 -16   9   -0.80    4.60
  11  15  -9   12.00    5.00
  11  15  -9    8.00    4.90
 -11 -15   9   11.70    5.50
  12  14  -9   53.69    6.10
  12  14  -9   63.59    6.60
 -12 -14   9   68.49    7.40
  13  13  -9   15.00    4.40
  13  13  -9   10.70    4.50
 -13 -13   9   14.80    5.30
  14  12  -9    0.30    3.80
  14  12  -9   -1.80    3.80
 -14 -12   9   -2.20    4.80
  15  11  -9   35.00    4.80
 -15 -11   9   33.30    5.20
  16  10  -9   89.49    7.80
 -16 -10   9   72.69    6.30
 -16 -10   9   95.89    7.50
  17   9  -9    8.30    3.80
 -17  -9   9   11.10    2.90
 -17  -9   9   14.60    4.60
  18   8  -9    0.80    3.40
 -18  -8   9   -5.40    4.10
  19   7  -9    6.10    3.90
 -19  -7   9    3.00    4.10
  20   6  -9   41.70    5.20
 -20  -6   9   26.70    5.00
  21   5  -9   -1.00    3.80
 -21  -5   9    7.50    4.60
  22   4  -9   39.50    5.20
 -22  -4   9   44.70    5.60
  23   3  -9   27.80    4.90
 -23  -3   9   23.70    5.10
  24   2  -9   43.70    5.60
 -24  -2   9   39.60    5.70
  25   1  -9   48.00    6.10
 -25  -1   9   43.60    6.00
  26   0  -9   -5.50    4.80
 -26   0   9    6.60    5.30
 -27   1   9    8.30    5.50
 -28   2   9    3.20    5.30
   6  18  -8   -1.00    5.20
  -6 -18   8    2.50    5.90
   7  17  -8    2.20    5.60
   7  17  -8   -2.30    4.50
  -7 -17   8   -8.00    5.90
   8  16  -8   33.70    5.90
   8  16  -8   32.00    6.20
  -8 -16   8   28.30    6.40
  -8 -16   8   35.80    5.00
   9  15  -8    1.60    4.90
   9  15  -8   -5.20    4.40
  -9 -15   8    5.90    5.60
  -9 -15   8    2.00    4.10
  10  14  -8   40.00    5.70
  10  14  -8   29.70    4.90
 -10 -14   8   34.50    5.70
  11  13  -8    1.60    3.90
  11  13  -8    2.40    4.20
 -11 -13   8    3.70    4.60
  12  12  -8   41.20    5.10
  12  12  -8   42.10    5.00
 -12 -12   8   44.00    5.50
  13  11  -8   -2.90    3.40
  13  11  -8    0.40    3.60
 -13 -11   8    0.30    4.30
 -14 -10   8   14.50    3.10
  15   9  -8   59.69    5.50
  15   9  -8   49.60    4.60
 -15  -9   8   48.80    4.20
 -15  -9   8   56.09    5.70
  16   8  -8   39.30    4.70
 -16  -8   8   38.40    3.50
 -16  -8   8   42.90    5.00
  17   7  -8   17.40    3.80
 -17  -7   8   19.50    4.10
 -17  -7   8   15.00    4.20
  18   6  -8    6.90    3.60
 -18  -6   8    0.60    3.40
 -18  -6   8    9.00    3.80
  19   5  -8  156.98    9.40
 -19  -5   8  139.19    9.60
 -19  -5   8  165.58    9.50
  20   4  -8    1.30    3.70
 -20  -4   8    0.50    3.90
 -20  -4   8    0.90    3.70
  21   3  -8   13.90    4.30
 -21  -3   8   14.80    4.10
 -21  -3   8   19.30    4.50
  22   2  -8    0.70    4.20
 -22  -2   8    7.10    4.40
  23   1  -8  177.08   11.60
 -23  -1   8  205.08   11.70
  24   0  -8    4.40    4.80
 -24   0   8    6.00    4.80
  25  -1  -8   19.70    5.60
 -25   1   8   25.80    5.50
  26  -2  -8   -0.80    5.00
 -26   2   8    0.30    5.10
 -27   3   8   -5.60    5.20
   3  19  -7   -6.90    5.10
  -3 -19   7    1.20    6.00
   4  18  -7   25.20    6.70
   4  18  -7   18.10    5.80
  -4 -18   7   23.20    7.00
   5  17  -7    1.60    5.90
   5  17  -7   -1.40    4.70
  -5 -17   7   -4.80    5.10
   6  16  -7   -4.00    4.90
   6  16  -7   -4.90    4.20
  -6 -16   7    4.30    3.70
  -6 -16   7   -0.90    4.90
   7  15  -7   19.00    5.60
   7  15  -7    9.10    4.40
  -7 -15   7   24.00    5.60
  -7 -15   7   11.70    4.00
   8  14  -7   82.89    6.70
   8  14  -7   84.69    7.40
  -8 -14   7   72.89    6.70
  -8 -14   7   97.49    7.40
   9  13  -7   -3.10    4.10
   9  13  -7    0.10    3.60
  -9 -13   7    1.50    4.70
  10  12  -7    1.10    3.90
  10  12  -7    2.80    3.70
 -10 -12   7    1.10    4.00
  11  11  -7  123.99    8.40
  11  11  -7  123.99    8.40
 -11 -11   7  115.29    8.90
  12  10  -7   39.90    4.80
  12  10  -7   31.40    4.40
 -12 -10   7   33.30    4.70
 -12 -10   7   33.40    3.80
  13   9  -7   84.69    6.90
  13   9  -7   81.99    6.40
 -13  -9   7   86.29    6.60
 -13  -9   7   76.09    6.60
 -13  -9   7   79.19    5.70
  14   8  -7   10.40    3.40
  14   8  -7   11.60    3.00
 -14  -8   7    9.20    3.70
 -14  -8   7   10.30    2.50
 -14  -8   7    7.60    3.10
  15   7  -7  178.18    8.40
  15   7  -7  189.88    9.60
 -15  -7   7  157.08    8.10
 -15  -7   7  189.38   10.00
 -15  -7   7  198.58    9.70
  16   6  -7   57.69    5.00
 -16  -6   7   44.30    4.70
 -16  -6   7   42.90    4.50
  17   5  -7   75.09    5.60
 -17  -5   7   59.09    5.60
 -17  -5   7   65.39    5.40
  18   4  -7   -6.80    3.40
 -18  -4   7   -3.40    3.30
 -18  -4   7   -1.30    3.60
  19   3  -7   34.40    4.50
 -19  -3   7   28.10    4.10
 -19  -3   7   26.90    4.40
  20   2  -7   78.19    6.10
 -20  -2   7   84.89    7.40
 -20  -2   7   69.39    5.90
  21   1  -7    1.20    4.30
 -21  -1   7    4.90    4.00
 -21  -1   7    4.80    3.80
  22   0  -7   -6.80    4.30
 -22   0   7    5.80    4.20
  23  -1  -7   62.89    6.50
 -23   1   7   68.19    6.50
  24  -2  -7   57.79    6.40
 -24   2   7   71.99    6.70
  25  -3  -7   -1.90    4.80
 -25   3   7   12.90    5.00
 -25   3   7    0.40    7.30
  26  -4  -7    1.20    5.30
 -26   4   7    5.50    8.00
 -26   4   7    5.20    5.20
 -27   5   7   -4.00    8.10
 -27   5   7    7.10    5.50
   1  19  -6    1.80    5.70
   1  19  -6    1.80    6.50
  -1 -19   6   -4.20    6.30
   2  18  -6   -3.50    5.40
   2  18  -6    5.00    6.20
  -2 -18   6    2.60    6.00
   3  17  -6   19.00    6.20
   3  17  -6   13.40    5.10
  -3 -17   6   11.60    5.50
   4  16  -6    4.30    5.50
   4  16  -6    9.50    5.00
  -4 -16   6    9.80    5.00
   5  15  -6  107.39    9.30
   5  15  -6  124.49   10.10
  -5 -15   6  126.79   10.00
   6  14  -6   -0.60    4.40
   6  14  -6    2.40    3.80
  -6 -14   6    0.80    4.30
  -6 -14   6    8.80    3.60
   7  13  -6   60.09    5.50
   7  13  -6   79.79    6.80
  -7 -13   6   77.39    6.60
   8  12  -6   13.50    4.30
   8  12  -6   22.60    4.20
  -8 -12   6   24.60    4.80
   9  11  -6  108.09    7.60
   9  11  -6  100.49    7.60
  -9 -11   6  104.99    8.20
  10  10  -6    2.80    3.20
  10  10  -6    9.20    3.30
 -10 -10   6    7.30    3.80
 -10 -10   6    2.40    2.60
  11   9  -6   67.99    6.30
  11   9  -6   64.79    5.80
 -11  -9   6   67.49    6.00
 -11  -9   6   69.69    5.30
 -11  -9   6   84.29    6.00
  12   8  -6  357.96   15.00
  12   8  -6  362.46   14.60
 -12  -8   6  352.26   14.30
 -12  -8   6  330.27   15.10
 -12  -8   6  356.16   14.90
  13   7  -6   59.39    4.90
  13   7  -6   49.99    4.50
 -13  -7   6   58.29    4.60
 -13  -7   6   59.09    4.40
 -13  -7   6   62.89    5.00
  14   6  -6    7.70    3.20
  14   6  -6   12.00    2.30
 -14  -6   6    2.50    3.30
 -14  -6   6    5.80    3.00
  15   5  -6  144.09    8.30
 -15  -5   6  142.99    8.40
 -15  -5   6  145.29    8.20
  16   4  -6  370.16   15.80
 -16  -4   6  367.36   15.90
 -16  -4   6  372.16   15.80
  17   3  -6   -4.00    3.30
 -17  -3   6   -2.80    3.10
 -17  -3   6   -3.70    2.70
  18   2  -6    1.10    3.80
 -18  -2   6    5.00    3.40
 -18  -2   6    2.60    3.40
  19   1  -6    8.10    4.00
 -19  -1   6    5.40    3.60
 -19  -1   6    8.50    3.70
  20   0  -6  255.57   12.90
 -20   0   6  248.58   12.40
 -20   0   6  244.18   12.80
  21  -1  -6    1.10    4.10
 -21   1   6    1.90    4.10
  22  -2  -6   14.00    5.00
 -22   2   6    9.90    4.80
 -22   2   6   10.90    6.50
  23  -3  -6   16.50    5.20
 -23   3   6   18.20    4.90
 -23   3   6   19.00    7.20
  24  -4  -6   19.30    5.40
 -24   4   6   13.70    5.10
 -24   4   6   19.30    7.30
  25  -5  -6   31.90    6.20
 -25   5   6   35.10    6.00
 -25   5   6   39.40    8.40
 -26   6   6   -5.30    7.20
 -26   6   6    2.10    5.00
  -1  19  -5   14.30    5.80
  -1  19  -5   23.50    7.10
   1 -19   5   21.90    6.10
   0  18  -5   -0.80    5.20
   0  18  -5   -1.00    5.90
   0 -18   5    1.90    5.20
   1  17  -5   -0.90    4.90
   1  17  -5    0.00    5.60
  -1 -17   5    0.80    5.50
   2  16  -5   11.40    4.80
   2  16  -5   12.20    5.40
  -2 -16   5   15.00    5.20
   3  15  -5   31.00    6.00
   3  15  -5   21.10    4.70
  -3 -15   5   28.00    5.60
   4  14  -5   29.50    5.30
   4  14  -5   37.50    4.80
  -4 -14   5   35.80    5.10
   5  13  -5    4.50    4.10
   5  13  -5    1.70    3.40
  -5 -13   5   -8.10    4.00
  -5 -13   5    4.50    3.10
   6  12  -5   -1.00    3.60
   6  12  -5   -1.40    3.20
  -6 -12   5   -1.50    3.60
   7  11  -5   82.69    6.70
   7  11  -5   81.99    6.80
  -7 -11   5   89.69    7.20
   8  10  -5  346.87   14.70
   8  10  -5  359.06   14.80
  -8 -10   5  331.97   14.80
  -8 -10   5  344.57   14.40
  -8 -10   5  331.67   14.50
   9   9  -5   40.40    4.00
   9   9  -5   49.60    4.30
   9   9  -5   44.90    4.20
  -9  -9   5   38.40    3.60
  -9  -9   5   38.10    4.20
  -9  -9   5   44.20    4.00
  10   8  -5   -1.70    2.40
  10   8  -5   -2.40    2.40
  10   8  -5    1.40    2.30
 -10  -8   5    0.60    2.90
 -10  -8   5    0.90    2.00
 -10  -8   5    3.30    2.50
  11   7  -5   57.39    4.90
  11   7  -5   70.69    5.70
  11   7  -5   68.89    5.20
 -11  -7   5   77.69    6.10
 -11  -7   5   66.69    5.50
 -11  -7   5   67.09    4.60
  12   6  -5  905.21   35.00
  12   6  -5  900.21   34.30
  12   6  -5  930.31   35.10
 -12  -6   5  884.01   34.20
 -12  -6   5  926.51   35.20
 -12  -6   5  935.01   35.10
  13   5  -5   71.19    5.40
  13   5  -5   69.49    6.10
 -13  -5   5   72.39    6.10
 -13  -5   5   75.19    5.90
 -13  -5   5   75.69    4.10
  14   4  -5   -0.10    1.00
  14   4  -5   -2.80    2.70
  14   4  -5   -0.80    3.30
 -14  -4   5   -0.90    2.50
 -14  -4   5   -4.70    2.80
  15   3  -5   89.19    6.90
 -15  -3   5   84.89    6.60
 -15  -3   5   94.69    6.70
  16   2  -5   46.10    4.60
 -16  -2   5   57.19    4.90
 -16  -2   5   50.79    4.40
  17   1  -5  187.58   10.40
 -17  -1   5  191.38   10.20
 -17  -1   5  208.68   10.10
  18   0  -5   -2.70    3.50
 -18   0   5    1.30    2.90
 -18   0   5   -4.20    3.40
  19  -1  -5  102.69    8.50
 -19   1   5   94.69    7.50
 -19   1   5  107.59   10.20
 -19   1   5   98.39    8.20
  20  -2  -5   23.80    4.80
 -20   2   5   26.90    4.80
 -20   2   5   33.30    6.60
  21  -3  -5   91.29    7.40
 -21   3   5   95.49    8.90
 -21   3   5   85.49    7.00
  22  -4  -5    0.60    5.00
 -22   4   5    2.30    6.10
 -22   4   5    8.10    4.50
  23  -5  -5   61.79    7.00
 -23   5   5   54.19    6.40
 -23   5   5   73.19    8.60
  24  -6  -5   12.20    5.90
 -24   6   5    8.30    5.00
 -24   6   5    7.30    7.00
  25  -7  -5   38.80    7.30
 -25   7   5   44.70    8.70
  -3  19  -4    0.90    6.00
  -3  19  -4    0.90    6.60
   3 -19   4    5.30    5.90
  -2  18  -4   -0.60    6.10
  -2  18  -4    1.40    5.10
   2 -18   4    2.50    5.20
  -1  17  -4   16.80    5.30
  -1  17  -4   25.10    6.40
   1 -17   4   25.00    5.60
   0  16  -4   56.09    7.10
   0  16  -4   59.59    6.70
   0 -16   4   71.79    6.60
   1  15  -4   -0.40    4.70
   1  15  -4    4.40    4.30
  -1 -15   4    4.20    4.60
   2  14  -4    3.10    3.80
   2  14  -4   -2.10    4.30
  -2 -14   4   -7.20    4.40
   3  13  -4   -2.50    4.00
   3  13  -4   -3.20    3.30
  -3 -13   4   -3.40    3.80
   4  12  -4  221.88   11.30
   4  12  -4  254.67   11.80
  -4 -12   4  226.28   11.60
   5  11  -4   31.90    3.70
   5  11  -4   30.70    4.10
  -5 -11   4   28.60    3.90
   6  10  -4    1.20    2.40
   6  10  -4   -0.70    2.90
   6  10  -4   -2.10    2.30
  -6 -10   4   -0.10    2.80
  -6 -10   4    2.90    2.40
  -6 -10   4    2.20    2.30
   7   9  -4   76.89    5.90
   7   9  -4   85.19    5.80
   7   9  -4   93.09    5.70
  -7  -9   4   81.89    5.40
  -7  -9   4   85.39    6.00
  -7  -9   4   79.09    5.70
   8   8  -4  294.67   12.50
   8   8  -4  292.37   12.30
   8   8  -4  288.57   12.40
  -8  -8   4  293.47   12.80
  -8  -8   4  286.87   12.10
  -8  -8   4  296.57   12.40
   9   7  -4   73.69    5.20
   9   7  -4   70.29    5.20
   9   7  -4   81.79    5.60
  -9  -7   4   79.29    5.30
  -9  -7   4   81.39    4.80
  -9  -7   4   79.19    5.80
  10   6  -4   -2.60    2.20
  10   6  -4   -1.60    2.30
  10   6  -4    0.50    2.00
 -10  -6   4   -2.30    2.30
 -10  -6   4    2.30    1.70
 -10  -6   4    1.00    2.30
  11   5  -4  407.66   16.50
  11   5  -4  405.46   15.80
  11   5  -4  399.26   16.60
 -11  -5   4  407.86   16.60
 -11  -5   4  433.56   16.60
 -11  -5   4  399.46   15.70
  12   4  -4  504.35   20.30
  12   4  -4  508.85   20.30
  12   4  -4  511.15   23.10
 -12  -4   4  510.55   20.40
 -12  -4   4  525.05   20.40
  13   3  -4  139.79    8.00
  13   3  -4  161.38    9.20
 -13  -3   4  143.39    7.80
 -13  -3   4  146.79    7.70
  14   2  -4    5.50    3.00
  14   2  -4    3.20    3.20
 -14  -2   4    1.30    2.70
 -14  -2   4    5.40    2.70
  15   1  -4   23.40    4.00
  15   1  -4   25.00    3.80
 -15  -1   4   16.10    3.30
 -15  -1   4   21.50    3.50
  16   0  -4  152.98    9.10
 -16   0   4  165.68    9.00
 -16   0   4  176.18    8.80
  17  -1  -4    8.80    3.80
 -17   1   4   11.90    4.80
 -17   1   4   10.70    3.50
 -17   1   4   11.00    3.20
  18  -2  -4   -0.80    4.10
 -18   2   4   -2.20    3.40
 -18   2   4   -4.90    4.50
 -18   2   4    1.10    3.50
  19  -3  -4  241.08   13.30
 -19   3   4  271.27   14.70
 -19   3   4  219.18   12.50
  20  -4  -4   92.19    7.70
 -20   4   4  108.99    9.50
  21  -5  -4    7.60    5.10
 -21   5   4   12.10    6.30
  22  -6  -4   -3.10    5.10
 -22   6   4    1.80    6.40
  23  -7  -4    7.80    5.90
 -23   7   4   12.60    7.20
  24  -8  -4   62.09    7.60
 -24   8   4   63.69    9.30
  -5  19  -3   -2.10    5.30
  -5  19  -3    5.40    6.60
   5 -19   3   -0.20    5.60
  -4  18  -3   36.80    6.90
  -4  18  -3   32.60    6.10
   4 -18   3   38.70    6.80
  -3  17  -3    2.90    5.80
  -3  17  -3    0.00    4.60
   3 -17   3    3.20    5.50
  -2  16  -3    0.40    4.40
  -2  16  -3   -1.60    5.10
   2 -16   3   -2.00    4.60
  -1  15  -3   11.70    4.50
  -1  15  -3   11.50    5.00
   1 -15   3    6.00    5.00
   0  14  -3   89.79    7.60
   0  14  -3   87.09    7.80
   0 -14   3  103.79    8.60
   1  13  -3   36.70    4.40
   1  13  -3   46.30    5.40
  -1 -13   3   39.00    4.90
   2  12  -3   25.20    4.00
   2  12  -3   16.30    3.90
  -2 -12   3   17.30    3.90
   3  11  -3   56.49    5.10
   3  11  -3   62.19    5.40
   3  11  -3   49.10    4.20
  -3 -11   3   56.39    4.70
   4  10  -3    2.70    2.40
   4  10  -3    7.10    2.90
   4  10  -3    4.20    2.40
  -4 -10   3    4.70    2.60
  -4 -10   3    2.20    2.80
  -4 -10   3    3.40    2.20
   5   9  -3  189.98    8.80
   5   9  -3  173.08    8.30
   5   9  -3  173.18    8.50
  -5  -9   3  170.88    8.30
  -5  -9   3  186.98    8.40
  -5  -9   3  169.98    8.60
   6   8  -3   56.89    4.80
   6   8  -3   62.39    5.10
   6   8  -3   57.49    4.70
  -6  -8   3   63.99    4.40
  -6  -8   3   51.99    4.70
  -6  -8   3   61.89    4.60
   7   7  -3  281.57   11.80
   7   7  -3  287.57   11.80
   7   7  -3  266.07   11.60
  -7  -7   3  277.07   11.90
  -7  -7   3  298.77   11.60
  -7  -7   3  267.37   11.70
   8   6  -3  189.88    8.50
   8   6  -3  185.08    8.30
   8   6  -3  175.58    8.10
  -8  -6   3  186.28    8.00
  -8  -6   3  176.18    8.20
  -8  -6   3  180.18    8.50
   9   5  -3   51.39    4.50
   9   5  -3   45.40    4.00
   9   5  -3   59.49    4.70
  -9  -5   3   48.30    4.30
  -9  -5   3   60.19    4.70
  -9  -5   3   49.00    3.60
  10   4  -3  208.78    8.90
  10   4  -3  227.48    9.90
  10   4  -3  223.28    9.80
 -10  -4   3  211.88    8.90
 -10  -4   3  236.28    9.90
 -10  -4   3  229.18   10.00
  11   3  -3 1229.38   50.69
  11   3  -3 1172.28   45.10
  11   3  -3 1189.18   45.10
 -11  -3   3 1144.59   45.10
 -11  -3   3 1227.68   45.10
  12   2  -3  107.29    6.50
  12   2  -3   99.09    7.20
 -12  -2   3   97.59    6.20
 -12  -2   3  108.09    6.20
  13   1  -3  111.59    6.90
  13   1  -3  119.29    7.70
 -13  -1   3  116.49    6.80
 -13  -1   3   98.99    6.70
  14   0  -3   -0.80    3.10
  14   0  -3   -0.40    3.00
 -14   0   3    1.20    2.40
 -14   0   3    0.50    2.60
  15  -1  -3   43.90    4.90
  15  -1  -3   49.40    4.70
 -15   1   3   53.29    5.50
 -15   1   3   50.29    4.60
 -15   1   3   52.89    4.50
  16  -2  -3  126.79    9.00
  16  -2  -3  124.49    9.50
 -16   2   3  136.19    9.60
 -16   2   3  141.49    8.10
  17  -3  -3   39.30    5.10
 -17   3   3   50.59    6.20
 -17   3   3   43.50    4.90
  18  -4  -3   -8.40    4.30
 -18   4   3   -2.60    4.70
  19  -5  -3   -2.40    4.80
 -19   5   3   -2.40    5.20
  20  -6  -3   66.79    6.80
 -20   6   3   71.69    8.10
  21  -7  -3    2.90    5.20
 -21   7   3    1.30    6.10
  22  -8  -3    2.70    5.80
 -22   8   3   -4.00    6.50
  23  -9  -3   16.20    6.50
 -23   9   3   19.40    7.60
  -6  18  -2   -1.00    5.00
  -6  18  -2   -1.10    6.10
   6 -18   2   -0.60    5.70
  -5  17  -2    3.00    5.00
  -5  17  -2    8.50    5.70
   5 -17   2    2.60    5.00
  -4  16  -2   12.50    5.80
  -4  16  -2    5.70    4.60
   4 -16   2    7.70    4.80
  -3  15  -2   -1.10    4.30
  -3  15  -2   11.90    5.40
   3 -15   2    1.20    4.60
  -2  14  -2   11.00    4.60
  -2  14  -2    5.90    4.30
   2 -14   2    6.00    4.60
  -1  13  -2   43.80    4.50
  -1  13  -2   55.49    5.60
   1 -13   2   62.39    5.40
   0  12  -2   65.99    5.60
   0  12  -2   62.39    5.00
   0  12  -2   73.49    5.90
   0 -12   2   66.69    5.50
   1  11  -2   41.80    3.80
   1  11  -2   48.00    4.30
   1  11  -2   40.20    4.40
  -1 -11   2   47.20    4.40
   2  10  -2    2.50    2.50
   2  10  -2   -3.10    2.30
   2  10  -2   -4.60    2.90
  -2 -10   2   -2.40    2.10
  -2 -10   2   -5.20    2.20
  -2 -10   2   -2.80    2.50
   3   9  -2  279.57   11.40
   3   9  -2  259.97   11.30
   3   9  -2  261.27   11.70
  -3  -9   2  266.37   11.20
  -3  -9   2  258.17   11.50
  -3  -9   2  266.67   11.40
   4   8  -2  117.09    6.60
   4   8  -2  116.49    6.10
   4   8  -2  104.89    6.00
  -4  -8   2  114.39    6.30
  -4  -8   2  112.89    5.90
  -4  -8   2  118.59    6.20
   5   7  -2  199.88    8.60
   5   7  -2  189.08    8.70
   5   7  -2  189.08    8.60
  -5  -7   2  183.58    8.80
  -5  -7   2  199.68    8.50
  -5  -7   2  197.38    8.60
   6   6  -2   43.10    3.30
   6   6  -2   46.90    3.90
   6   6  -2   42.90    3.90
  -6  -6   2   46.80    4.20
  -6  -6   2   48.40    4.00
  -6  -6   2   47.70    3.70
   7   5  -2  205.88    8.70
   7   5  -2  190.98    8.40
   7   5  -2  203.28    8.80
  -7  -5   2  197.58    8.80
  -7  -5   2  204.78    8.40
  -7  -5   2  202.68    8.80
   8   4  -2  244.78   10.60
   8   4  -2  253.87   10.60
   8   4  -2  248.78   10.00
  -8  -4   2  248.68   10.60
  -8  -4   2  250.57    9.90
  -8  -4   2  257.27   10.60
   9   3  -2  206.18    9.10
   9   3  -2  201.68    8.10
   9   3  -2  200.98    9.00
  -9  -3   2  201.38    9.00
  -9  -3   2  195.98    8.90
  10   2  -2  392.26   17.40
  10   2  -2  366.56   15.50
 -10  -2   2  370.46   15.40
 -10  -2   2  387.96   15.30
  11   1  -2   93.19    6.60
  11   1  -2   87.49    6.00
 -11  -1   2   96.09    5.80
 -11  -1   2   81.39    5.70
  12   0  -2 1073.79   40.60
  12   0  -2 1064.69   45.40
 -12   0   2 1095.89   40.60
 -12   0   2 1022.40   40.50
  13  -1  -2   74.39    6.50
  13  -1  -2   76.19    6.40
  13  -1  -2   66.09    5.00
 -13   1   2   69.99    5.50
 -13   1   2   79.29    6.70
  14  -2  -2   15.00    3.90
  14  -2  -2   16.60    3.80
 -14   2   2   17.00    4.00
 -14   2   2   19.80    3.30
  15  -3  -2   -4.30    3.50
 -15   3   2   -1.10    3.60
 -15   3   2   -1.20    2.60
  16  -4  -2  337.07   15.10
 -16   4   2  318.47   14.70
 -16   4   2  318.57   16.40
  17  -5  -2   47.60    5.60
 -17   5   2   43.50    6.00
  18  -6  -2    4.20    4.80
 -18   6   2    2.60    5.00
  19  -7  -2    0.30    4.80
 -19   7   2    1.30    5.30
  20  -8  -2   39.40    6.40
 -20   8   2   43.80    7.10
  21  -9  -2   27.30    6.20
 -21   9   2   12.60    6.40
  22 -10  -2   -4.60    6.00
 -22  10   2   -3.90    6.30
  -8  18  -1   19.90    6.40
  -8  18  -1    5.70    5.30
   8 -18   1   13.00    5.60
  -7  17  -1    0.90    4.90
  -7  17  -1    6.20    5.80
   7 -17   1   16.20    5.70
  -6  16  -1    0.40    5.20
  -6  16  -1   -2.70    4.50
   6 -16   1   -2.10    4.70
  -5  15  -1   25.10    5.10
  -5  15  -1   37.20    5.80
   5 -15   1   34.60    5.10
  -4  14  -1    7.40    4.60
  -4  14  -1   -1.00    3.80
   4 -14   1    2.30    4.50
  -3  13  -1   15.20    4.60
  -3  13  -1   13.90    3.90
   3 -13   1    9.60    4.30
  -2  12  -1    4.70    3.60
  -2  12  -1    8.80    2.80
  -2  12  -1   15.70    3.30
   2 -12   1    5.80    3.80
  -1  11  -1  495.75   20.40
  -1  11  -1  494.95   20.20
  -1  11  -1  502.15   20.10
   1 -11   1  511.45   20.40
   0  10  -1   11.50    2.60
   0  10  -1   11.50    3.20
   0  10  -1   13.00    2.70
   0 -10   1    7.10    2.10
   0 -10   1    9.50    2.90
   1   9  -1   82.39    5.90
   1   9  -1   75.99    5.10
   1   9  -1   69.69    5.00
  -1  -9   1   75.69    4.90
  -1  -9   1   67.39    5.40
  -1  -9   1   74.39    4.80
   2   8  -1  104.79    5.70
   2   8  -1  105.89    6.30
   2   8  -1  108.09    5.70
  -2  -8   1  108.99    5.50
  -2  -8   1  103.49    5.90
  -2  -8   1   95.59    5.70
   3   7  -1  117.29    5.80
   3   7  -1  116.69    6.20
   3   7  -1  121.69    5.90
  -3  -7   1  126.89    6.10
  -3  -7   1  110.79    5.90
  -3  -7   1  117.49    5.80
   4   6  -1  682.23   25.90
   4   6  -1  672.33   25.90
   4   6  -1  676.73   25.70
  -4  -6   1  660.83   25.90
  -4  -6   1  722.93   25.80
  -4  -6   1  667.73   25.90
   5   5  -1  169.38    7.40
   5   5  -1  166.68    7.30
   5   5  -1  168.38    7.30
  -5  -5   1  166.68    7.20
  -5  -5   1  161.18    7.20
  -5  -5   1  163.28    7.40
   6   4  -1    7.00    1.70
   6   4  -1   10.30    2.10
   6   4  -1    7.60    1.90
  -6  -4   1    9.30    1.60
  -6  -4   1    9.10    1.90
  -6  -4   1    7.30    1.80
   7   3  -1    5.50    2.00
   7   3  -1    2.10    1.90
   7   3  -1    4.20    1.50
  -7  -3   1    5.00    1.90
  -7  -3   1    2.40    1.30
  -7  -3   1    6.00    1.80
   8   2  -1  882.51   34.10
   8   2  -1  901.11   38.20
   8   2  -1  912.91   34.20
  -8  -2   1  878.61   34.10
  -8  -2   1  925.91   34.10
   9   1  -1   45.40    4.00
   9   1  -1   44.30    3.60
  -9  -1   1   50.29    4.30
  -9  -1   1   46.30    3.50
  10   0  -1   -3.00    2.70
  10   0  -1   -0.60    2.60
 -10   0   1    1.60    2.20
 -10   0   1    0.00    1.80
  11  -1  -1   82.59    6.50
  11  -1  -1  111.09    6.50
 -11   1   1   79.39    5.70
  12  -2  -1    8.10    3.00
  12  -2  -1    6.60    2.70
  12  -2  -1   12.60    3.30
 -12   2   1   14.50    3.40
 -12   2   1   15.60    2.90
  13  -3  -1   88.39    7.00
  13  -3  -1   94.59    6.50
 -13   3   1   93.89    6.10
 -13   3   1   85.89    6.90
  14  -4  -1   24.90    4.30
 -14   4   1   20.90    4.20
 -14   4   1   20.00    3.40
  15  -5  -1  138.89    7.10
  15  -5  -1  120.99    9.20
 -15   5   1  137.39    9.50
  16  -6  -1   -1.20    4.30
  16  -6  -1    0.90    2.70
 -16   6   1    4.60    4.30
  17  -7  -1   69.29    6.10
  17  -7  -1   66.39    6.50
 -17   7   1   73.59    7.00
  18  -8  -1   -4.20    4.90
 -18   8   1    2.50    4.80
  19  -9  -1   96.29    8.10
 -19   9   1   80.59    8.10
  20 -10  -1   16.30    6.00
 -20  10   1    7.50    5.80
  21 -11  -1   31.00    6.90
 -10  18   0   -3.40    5.70
 -10  18   0    1.80    5.30
  10 -18   0    2.70    5.90
  -9  17   0   13.70    5.40
  -9  17   0   17.30    6.10
   9 -17   0   13.00    5.40
  -8  16   0   -1.00    5.30
  -8  16   0   -2.00    4.50
   8 -16   0   -1.20    4.70
  -7  15   0   11.80    5.20
  -7  15   0   10.50    4.40
   7 -15   0   12.70    4.70
  -6  14   0   20.40    5.30
  -6  14   0   25.30    4.50
   6 -14   0   26.40    4.90
  -5  13   0   13.20    4.50
  -5  13   0    7.40    3.80
  -5  13   0    9.20    3.40
   5 -13   0    6.10    4.00
  -4  12   0  195.78    9.50
  -4  12   0  183.08    9.80
  -4  12   0  183.28   10.40
   4 -12   0  190.28   10.00
  -3  11   0    6.50    2.50
  -3  11   0   21.80    3.10
  -3  11   0   14.10    3.80
   3 -11   0   14.10    3.60
  -2  10   0    6.20    2.40
  -2  10   0    7.20    3.20
  -2  10   0    4.70    2.60
   2 -10   0    8.50    2.50
   2 -10   0    2.30    1.50
   2 -10   0    7.10    2.90
  -1   9   0  158.88    7.60
  -1   9   0  148.79    8.00
  -1   9   0  157.18    7.50
   1  -9   0  157.18    7.60
   1  -9   0  157.18    7.80
   0   8   0  501.15   20.20
   0   8   0  508.05   20.00
   0   8   0  527.35   20.00
   0  -8   0  518.05   20.10
   1   7   0    1.90    1.50
   1   7   0    5.60    1.70
   1   7   0    2.50    2.10
  -1  -7   0    1.60    1.90
  -1  -7   0   -0.50    1.70
   2   6   0    7.60    1.90
   2   6   0    7.00    1.60
   2   6   0    9.50    2.10
  -2  -6   0    6.30    1.70
  -2  -6   0    5.30    1.80
   3   5   0  260.27   10.50
   3   5   0  251.17   10.50
   3   5   0  264.07   10.50
  -3  -5   0  271.27   10.50
  -3  -5   0  254.17   10.50
   4   4   0  876.91   31.90
   4   4   0  856.71   31.90
   4   4   0  865.21   31.60
  -4  -4   0  861.01   31.90
  -4  -4   0  883.71   31.60
  -4  -4   0  744.33   31.80
   5   3   0   16.90    1.90
   5   3   0   16.20    2.30
   5   3   0   19.30    2.30
  -5  -3   0   17.10    2.10
  -5  -3   0   18.90    2.10
  -5  -3   0   20.00    1.90
   6   2   0  114.19    5.90
   6   2   0  119.49    5.90
   6   2   0  122.99    5.30
  -6  -2   0  117.59    5.70
  -6  -2   0  113.89    5.80
   8   0   0 1110.09   45.10
   8   0   0 1051.19   40.50
  -8   0   0 1050.09   40.40
   9  -1   0  363.86   14.70
   9  -1   0  352.06   14.70
   9  -1   0  349.96   16.30
  -9   1   0  368.56   16.30
  -9   1   0  368.06   14.60
  10  -2   0   32.70    3.50
  10  -2   0   34.50    3.60
  10  -2   0   36.00    3.80
 -10   2   0   33.60    3.40
 -10   2   0   35.00    3.60
  11  -3   0  438.06   17.60
  11  -3   0  444.26   17.70
  11  -3   0  409.66   16.70
 -11   3   0  427.36   19.20
 -11   3   0  423.46   17.50
  12  -4   0    7.30    3.40
  12  -4   0    3.20    2.70
  12  -4   0    6.00    2.30
 -12   4   0    4.50    2.50
 -12   4   0    8.10    3.20
  13  -5   0  118.99    8.60
  13  -5   0  127.49    6.90
 -13   5   0  123.79    7.70
 -13   5   0  115.39    8.10
  14  -6   0   12.20    4.40
  14  -6   0   10.80    3.00
 -14   6   0   15.70    4.00
  15  -7   0   -3.70    4.70
  15  -7   0    3.50    3.10
 -15   7   0    6.70    4.10
  16  -8   0   92.19    7.70
 -16   8   0  101.29    8.80
  17  -9   0   14.10    5.70
 -17   9   0    8.70    4.80
  18 -10   0    5.90    5.80
 -18  10   0    1.90    4.90
  19 -11   0    9.10    5.70
 -19  11   0    3.30    5.40
 -11  17   1   -2.90    5.50
 -11  17   1   -1.80    4.80
  11 -17  -1   -8.80    5.40
 -10  16   1   -4.20    4.90
 -10  16   1   -9.90    5.20
  10 -16  -1    3.30    5.10
  -9  15   1   15.20    5.50
  -9  15   1   10.40    4.80
   9 -15  -1   21.60    5.30
  -8  14   1   76.79    6.70
  -8  14   1   73.49    6.20
   8 -14  -1   76.49    6.60
  -7  13   1   -4.10    4.20
  -7  13   1   -8.10    3.60
  -7  13   1   -2.60    2.90
   7 -13  -1   -8.50    3.80
  -6  12   1   -6.60    2.70
  -6  12   1   -4.90    3.00
  -6  12   1   -3.30    3.70
   6 -12  -1   -5.20    3.60
  -5  11   1   16.50    2.90
  -5  11   1   15.90    3.90
  -5  11   1   12.20    3.10
   5 -11  -1   16.60    3.50
  -4  10   1  346.37   14.90
  -4  10   1  334.97   15.30
  -4  10   1  382.36   14.90
   4 -10  -1  394.76   15.20
   4 -10  -1  356.56   14.80
   4 -10  -1  369.56   15.20
  -3   9   1    3.30    2.10
  -3   9   1    0.20    2.70
  -3   9   1    6.30    2.20
   3  -9  -1    1.60    2.60
   3  -9  -1    3.80    2.40
   3  -9  -1    5.70    2.00
  -2   8   1  106.19    5.80
  -2   8   1  103.69    5.60
  -2   8   1  108.99    6.20
   2  -8  -1  109.79    5.40
   2  -8  -1  105.19    6.00
   2  -8  -1  110.99    6.10
  -1   7   1  112.69    5.50
  -1   7   1  113.29    5.40
  -1   7   1  103.99    5.70
   1  -7  -1  112.89    5.70
   1  -7  -1  105.89    5.10
   0   6   1   91.59    5.30
   0   6   1   92.89    4.70
   0   6   1  100.89    4.90
   0  -6  -1  101.79    4.90
   1   5   1  124.49    5.70
   1   5   1  131.69    5.80
   1   5   1  133.69    6.10
  -1  -5  -1  139.39    5.90
  -1  -5  -1  117.69    5.60
  -1  -5  -1  129.29    5.90
   2   4   1   68.49    3.90
   2   4   1   72.59    3.80
   2   4   1   64.09    4.10
  -2  -4  -1   69.29    3.60
  -2  -4  -1   63.49    3.80
  -2  -4  -1   67.39    3.90
   3   3   1  965.40   35.40
   3   3   1  956.70   35.80
   3   3   1  945.21   35.70
  -3  -3  -1  964.60   35.40
  -3  -3  -1  942.01   35.70
   4   2   1  490.25   18.30
   4   2   1  475.85   18.50
   4   2   1  475.95   18.50
  -4  -2  -1  481.85   18.50
   5   1   1  592.24   23.00
  -5  -1  -1  616.84   23.00
  -5  -1  -1  597.24   23.00
   6   0   1   -1.40    1.80
   6   0   1   -1.70    1.80
  -6   0  -1   -0.80    1.50
   7  -1   1  979.10   35.70
   7  -1   1  898.51   35.60
   7  -1   1  959.70   39.60
  -7   1  -1  926.91   35.60
  -7   1  -1  934.71   39.50
   8  -2   1  478.85   21.00
   8  -2   1  483.05   19.20
   8  -2   1  491.35   19.30
  -8   2  -1  482.55   19.00
  -8   2  -1  473.85   20.90
   9  -3   1  411.56   16.50
   9  -3   1  405.46   16.60
  -9   3  -1  408.86   16.40
  -9   3  -1  389.36   17.90
  10  -4   1    8.50    2.60
  10  -4   1   13.20    3.30
 -10   4  -1   10.60    2.70
  11  -5   1  103.59    6.30
  11  -5   1   99.79    7.60
 -11   5  -1  106.29    7.10
 -11   5  -1  104.19    6.70
 -11   5  -1  101.39    6.70
  12  -6   1  100.29    8.30
  12  -6   1  109.89    7.00
 -12   6  -1  103.89    7.50
 -12   6  -1  111.79    7.30
  13  -7   1  106.69    7.20
  13  -7   1   98.79    8.90
 -13   7  -1  102.49    7.70
 -13   7  -1  100.39    7.80
  14  -8   1    2.30    4.80
 -14   8  -1    2.50    3.60
 -14   8  -1    2.70    3.90
  15  -9   1    0.70    5.20
 -15   9  -1   -3.30    4.10
 -15   9  -1    1.10    3.80
  16 -10   1  173.38   12.70
 -16  10  -1  165.78   11.50
 -16  10  -1  192.98   11.30
  17 -11   1    2.90    6.00
 -17  11  -1   -2.30    4.70
  18 -12   1    0.50    6.50
 -18  12  -1    3.00    5.70
 -13  17   2    0.90    5.30
 -13  17   2   -1.50    5.60
 -12  16   2   37.20    6.50
 -12  16   2   54.49    6.40
  12 -16  -2   37.50    6.40
 -11  15   2    1.30    4.40
 -11  15   2   -1.10    5.00
  11 -15  -2    0.80    4.90
 -10  14   2   -6.80    4.40
 -10  14   2    1.60    4.10
  10 -14  -2   -1.20    4.40
  -9  13   2   16.30    4.80
  -9  13   2   11.90    3.50
  -9  13   2   14.90    4.00
   9 -13  -2   19.40    4.60
  -8  12   2   78.89    6.10
  -8  12   2   70.09    6.00
  -8  12   2   67.49    5.50
   8 -12  -2   76.99    5.70
  -7  11   2   41.80    4.20
  -7  11   2   39.00    3.80
  -7  11   2   49.70    5.00
   7 -11  -2   42.20    4.30
  -6  10   2    3.20    3.20
  -6  10   2    4.00    2.30
  -6  10   2    1.40    2.50
   6 -10  -2    4.30    2.60
   6 -10  -2    5.00    2.20
   6 -10  -2   -1.10    2.80
  -5   9   2  172.78    8.30
  -5   9   2  180.78    8.10
  -5   9   2  173.48    8.80
   5  -9  -2  181.48    8.50
   5  -9  -2  180.48    8.50
   5  -9  -2  169.98    7.90
  -4   8   2  108.59    5.50
  -4   8   2  117.59    5.80
  -4   8   2   99.89    6.20
   4  -8  -2  100.49    6.00
   4  -8  -2  119.79    6.20
   4  -8  -2  112.99    5.50
  -3   7   2  242.58    9.50
  -3   7   2  227.18    9.90
  -3   7   2  224.98    9.40
   3  -7  -2  223.98    9.60
   3  -7  -2  221.38    9.30
   3  -7  -2  226.58    9.70
  -2   6   2    3.00    1.50
  -2   6   2    2.60    1.40
  -2   6   2    2.00    2.10
   2  -6  -2   -0.60    0.80
   2  -6  -2   -0.30    0.90
   2  -6  -2    3.40    1.70
  -1   5   2   23.90    1.90
  -1   5   2   21.20    2.30
  -1   5   2   20.90    1.80
   1  -5  -2   22.90    1.90
   1  -5  -2   23.10    1.80
   0   4   2   98.89    5.10
   0   4   2   93.59    4.50
   0   4   2   97.89    4.60
   0  -4  -2   95.39    4.50
   0  -4  -2   95.79    4.50
   1   3   2  130.19    5.70
   1   3   2  129.79    5.80
   1   3   2  141.99    6.10
  -1  -3  -2  129.99    5.70
  -1  -3  -2  134.09    5.70
  -1  -3  -2  129.19    6.20
  -1  -3  -2  131.49    5.90
   2   2   2  168.68    6.50
   2   2   2  132.69    6.40
  -2  -2  -2  133.89    6.40
  -2  -2  -2  152.18    6.40
  -3  -1  -2  459.15   17.60
   4   0   2 1552.74   56.99
   4   0   2 1489.05   56.89
   4   0   2 1540.85   63.39
   6  -2   2  616.54   24.30
   6  -2   2  654.93   24.40
  -6   2  -2  625.54   26.70
  -6   2  -2  623.84   24.20
   7  -3   2  122.69    6.90
   7  -3   2  112.59    6.30
  -7   3  -2   95.19    5.90
  -7   3  -2  125.59    6.20
  -7   3  -2  106.59    6.10
   8  -4   2  905.61   35.50
   8  -4   2  933.21   35.60
   8  -4   2  983.20   35.10
  -8   4  -2  905.91   35.40
  -8   4  -2  934.11   35.50
  -8   4  -2  897.21   39.10
   9  -5   2   22.50    3.20
   9  -5   2   21.30    3.50
   9  -5   2   12.90    3.20
  -9   5  -2   22.70    3.20
  -9   5  -2   30.40    3.50
  -9   5  -2   26.40    3.30
  10  -6   2   24.10    3.40
  10  -6   2   20.10    4.00
 -10   6  -2   24.70    3.90
 -10   6  -2   17.90    3.40
 -10   6  -2   22.30    3.50
 -10   6  -2   15.80    3.00
  11  -7   2   32.90    4.10
  11  -7   2   19.60    4.30
 -11   7  -2   22.80    4.00
 -11   7  -2   26.30    4.00
  12  -8   2  198.48   11.40
 -12   8  -2  182.58   10.40
 -12   8  -2  180.08   10.50
  13  -9   2   22.40    5.50
 -13   9  -2   22.70    4.80
 -13   9  -2   17.60    4.50
  14 -10   2   15.00    5.60
 -14  10  -2   13.00    4.70
 -14  10  -2   14.70    4.50
  15 -11   2   31.70    6.30
 -15  11  -2   47.00    6.20
 -15  11  -2   34.40    5.50
  16 -12   2    8.30    6.40
 -16  12  -2    9.00    5.10
 -16  12  -2   12.20    5.20
 -14  16   3    3.20    5.30
 -14  16   3   -2.90    4.90
 -13  15   3   45.70    6.10
 -13  15   3   37.80    6.10
  13 -15  -3   43.80    6.20
 -12  14   3   26.80    4.90
 -12  14   3   25.60    5.40
  12 -14  -3   22.00    5.20
 -11  13   3   57.79    5.30
 -11  13   3   66.19    6.10
 -11  13   3   76.79    6.10
  11 -13  -3   98.19    8.50
 -10  12   3    7.20    3.10
 -10  12   3    9.30    4.20
 -10  12   3   16.20    4.00
  10 -12  -3   10.40    4.10
  -9  11   3   51.99    5.10
  -9  11   3   41.10    4.30
  -9  11   3   46.10    4.10
   9 -11  -3   57.39    4.80
  -8  10   3   -2.10    2.30
  -8  10   3   -2.00    2.50
  -8  10   3   -3.90    3.20
   8 -10  -3   -2.80    2.50
   8 -10  -3   -2.70    2.90
  -7   9   3  194.48    8.80
  -7   9   3  201.48    9.50
  -7   9   3  192.28    9.10
   7  -9  -3  199.98    9.20
   7  -9  -3  192.18    8.70
   7  -9  -3  199.58    9.20
  -6   8   3   55.99    4.90
  -6   8   3   58.39    4.10
  -6   8   3   57.49    4.30
   6  -8  -3   60.39    4.70
   6  -8  -3   53.19    4.70
   6  -8  -3   57.99    4.00
  -5   7   3  226.78    9.20
  -5   7   3  221.78    9.30
  -5   7   3  207.38    9.60
   5  -7  -3  221.38    9.40
   5  -7  -3  214.18    9.00
   5  -7  -3  231.58    9.60
  -4   6   3  190.28    8.50
  -4   6   3  185.38    8.00
  -4   6   3  203.68    8.10
   4  -6  -3  200.08    8.20
  -3   5   3  455.55   17.50
  -3   5   3  442.86   17.70
  -3   5   3  474.55   17.50
   3  -5  -3  475.45   17.50
   3  -5  -3  462.85   17.40
   3  -5  -3  454.65   17.70
  -2   4   3   44.70    2.80
  -2   4   3   46.80    2.60
  -2   4   3   44.60    3.70
   2  -4  -3   42.30    2.80
   2  -4  -3   50.29    3.40
   2  -4  -3   43.90    2.70
  -1   3   3 3121.69  112.09
  -1   3   3 3018.10  111.29
  -1   3   3 3013.40  120.19
  -1   3   3 2993.30  112.09
   1  -3  -3 3092.19  112.19
   1  -3  -3 3011.20  111.29
   1  -3  -3 2973.10  112.09
   1  -3  -3 3065.39  119.99
   0   2   3   85.49    4.00
   0   2   3   83.09    4.90
   0   2   3   76.69    4.00
   0  -2  -3   77.69    4.00
   0  -2  -3   82.59    4.50
   0  -2  -3   85.39    4.00
   1   1   3  606.74   24.00
   1   1   3  566.74   22.20
  -1  -1  -3  579.34   22.20
  -1  -1  -3  605.64   23.90
   2   0   3   -0.60    1.40
   2   0   3   -1.10    1.70
  -2   0  -3   -2.80    1.50
  -2   0  -3   -1.20    1.30
   3  -1   3  173.88    7.50
   3  -1   3  167.58    7.50
  -3   1  -3  175.68    8.00
  -3   1  -3  175.28    7.40
   4  -2   3  602.14   22.30
   4  -2   3  594.84   22.20
  -4   2  -3  546.45   23.70
  -4   2  -3  567.14   22.10
  -4   2  -3  567.24   22.10
  -5   3  -3  284.07   11.80
  -5   3  -3  285.77   11.80
   6  -4   3   64.89    5.10
   6  -4   3   62.09    5.60
   6  -4   3   59.59    4.50
  -6   4  -3   60.79    4.80
  -6   4  -3   64.29    4.70
   7  -5   3  115.99    6.80
   7  -5   3  125.59    7.30
   7  -5   3  119.69    7.50
  -7   5  -3  116.29    6.60
  -7   5  -3  114.49    6.50
  -7   5  -3  117.19    7.20
  -7   5  -3  115.99    6.70
   8  -6   3   15.60    3.90
   8  -6   3    7.30    3.30
   8  -6   3   13.90    3.20
  -8   6  -3   11.10    2.80
  -8   6  -3   11.40    2.80
  -8   6  -3   11.40    3.20
  -8   6  -3   11.60    3.00
   9  -7   3   84.79    6.50
   9  -7   3   90.39    6.80
  -9   7  -3   75.09    6.80
  -9   7  -3   80.89    6.60
  -9   7  -3   88.89    6.20
  10  -8   3   -4.20    4.30
 -10   8  -3    0.90    3.70
 -10   8  -3    5.10    3.40
  11  -9   3   19.10    4.90
 -11   9  -3   23.00    4.20
 -11   9  -3   25.50    4.20
  12 -10   3   11.20    5.10
 -12  10  -3    9.80    4.00
 -12  10  -3    8.50    3.90
  13 -11   3   20.50    6.30
 -13  11  -3   13.30    4.40
 -13  11  -3   17.90    5.00
  14 -12   3   -0.80    5.90
 -14  12  -3   -0.40    4.40
 -14  12  -3   -0.90    4.90
  15 -13   3   -2.30    6.20
 -15  13  -3    7.50    5.30
 -16  16   4    1.70    5.10
 -16  16   4    5.10    5.40
 -15  15   4   16.40    5.20
 -15  15   4   22.30    5.60
 -14  14   4   -0.30    4.70
 -14  14   4    4.70    4.30
  14 -14  -4    2.40    4.90
 -13  13   4   51.89    5.10
 -13  13   4   58.19    5.70
 -13  13   4   60.99    5.90
  13 -13  -4   67.89    6.20
 -12  12   4   13.40    3.90
 -12  12   4    8.40    3.40
 -12  12   4   14.20    4.30
  12 -12  -4    8.20    4.20
 -11  11   4  130.29    9.00
 -11  11   4  156.08    8.90
 -11  11   4  161.28    8.50
  11 -11  -4  170.08    9.20
 -10  10   4   10.60    3.00
 -10  10   4   12.80    3.00
 -10  10   4   18.40    3.80
  10 -10  -4   13.20    3.10
  10 -10  -4    9.50    3.40
  -9   9   4   34.60    3.50
  -9   9   4   37.10    3.90
  -9   9   4   40.40    3.50
   9  -9  -4   38.10    3.80
   9  -9  -4   35.70    3.50
   9  -9  -4   38.80    3.20
  -8   8   4  303.07   12.00
  -8   8   4  288.07   12.20
  -8   8   4  288.47   12.00
   8  -8  -4  276.17   11.80
   8  -8  -4  286.17   12.10
   8  -8  -4  295.17   12.10
  -7   7   4  123.29    6.10
  -7   7   4  132.29    6.20
  -7   7   4  131.49    6.80
   7  -7  -4  131.19    6.40
   7  -7  -4  126.69    6.00
   7  -7  -4  121.09    6.40
  -6   6   4   56.09    3.60
  -6   6   4   51.49    3.50
  -6   6   4   49.99    4.30
   6  -6  -4   52.79    3.70
  -5   5   4  195.68    7.80
  -5   5   4  188.08    8.30
  -5   5   4  191.18    7.80
   5  -5  -4  197.38    7.90
   5  -5  -4  196.38    7.70
   5  -5  -4  189.48    8.20
  -4   4   4 1035.30   38.40
   4  -4  -4 1028.50   38.40
  -3   3   4  579.54   22.30
  -3   3   4  599.64   23.80
  -2   2   4  129.39    6.60
   2  -2  -4  146.59    6.40
  -1   1   4  145.19    5.90
  -1   1   4  133.79    6.00
  -1   1   4  153.28    6.90
   1  -1  -4  149.29    6.80
   1  -1  -4  149.19    5.90
   0   0   4  881.91   34.00
   0   0   4  877.71   36.60
   0   0  -4  943.41   34.00
   0   0  -4  914.71   36.50
   0   0  -4  932.51   34.00
   1  -1   4   40.60    3.30
   1  -1   4   41.90    3.60
   1  -1   4   45.00    3.40
  -1   1  -4   40.90    2.80
  -1   1  -4   36.40    2.90
   2  -2   4   42.20    3.50
   2  -2   4   49.70    4.00
   2  -2   4   46.90    3.80
  -2   2  -4   32.80    3.00
  -2   2  -4   40.20    3.30
   3  -3   4   18.20    2.50
   3  -3   4   22.10    2.80
  -3   3  -4   18.10    2.80
  -3   3  -4   19.50    2.30
  -3   3  -4   22.30    2.20
   4  -4   4  579.34   23.00
   4  -4   4  563.74   23.00
  -4   4  -4  564.64   22.90
  -4   4  -4  587.74   22.80
  -4   4  -4  641.74   24.50
   5  -5   4  142.29    7.70
   5  -5   4  141.19    7.80
   5  -5   4  140.69    7.70
  -5   5  -4  143.19    7.40
  -5   5  -4  139.59    7.10
  -5   5  -4  141.99    7.80
   6  -6   4   44.70    4.20
   6  -6   4   43.90    4.40
   6  -6   4   46.30    4.20
  -6   6  -4   40.90    3.70
  -6   6  -4   40.60    3.90
  -6   6  -4   43.10    4.20
   7  -7   4  165.08    9.80
   7  -7   4  190.68    9.20
  -7   7  -4  163.88    9.50
  -7   7  -4  171.78    9.10
   8  -8   4   -0.90    4.10
  -8   8  -4   -1.00    3.20
  -8   8  -4   -2.40    3.00
  -8   8  -4   -3.30    2.70
   9  -9   4   54.59    6.20
  -9   9  -4   58.99    5.90
  -9   9  -4   59.49    5.10
  10 -10   4   -6.30    4.80
 -10  10  -4   -7.00    3.50
 -10  10  -4   -6.80    3.20
  11 -11   4   20.50    5.90
 -11  11  -4   25.70    4.60
 -11  11  -4   30.40    5.70
  12 -12   4    3.80    5.50
 -12  12  -4    7.60    4.30
 -12  12  -4    3.30    4.70
  13 -13   4    9.60    6.30
 -13  13  -4   13.70    5.10
 -17  15   5   18.20    5.40
 -17  15   5    7.50    5.30
 -17  15   5   12.50    7.10
 -16  14   5   61.09    6.50
 -16  14   5   53.69    6.20
 -15  13   5   21.70    4.70
 -15  13   5   27.70    5.00
  15 -13  -5   21.60    5.10
 -14  12   5   21.00    4.30
 -14  12   5   17.20    4.50
 -14  12   5   19.60    3.90
  14 -12  -5   27.70    4.70
 -13  11   5   -1.10    3.30
 -13  11   5    1.70    3.80
 -13  11   5   -3.20    3.00
  13 -11  -5   -1.50    3.90
 -12  10   5  136.39    7.70
 -12  10   5  121.69    7.40
 -12  10   5  122.39    8.10
  12 -10  -5  124.29    7.50
  12 -10  -5  132.29    8.30
 -11   9   5   41.90    3.90
 -11   9   5   46.40    3.80
 -11   9   5   41.80    4.10
  11  -9  -5   51.19    4.30
  11  -9  -5   45.30    3.90
 -10   8   5    3.20    2.70
 -10   8   5   -1.80    2.20
 -10   8   5   -1.60    2.10
  10  -8  -5    1.60    2.10
  10  -8  -5    1.20    2.70
  10  -8  -5   -1.80    1.90
  -9   7   5    9.50    2.60
  -9   7   5    7.10    2.10
  -8   6   5  382.36   15.00
  -8   6   5  372.06   15.20
  -8   6   5  402.56   14.90
   8  -6  -5  358.76   15.00
   8  -6  -5  396.56   14.90
  -7   5   5   42.30    3.00
  -7   5   5   38.80    3.10
  -7   5   5   43.80    3.00
   7  -5  -5   38.20    2.90
   7  -5  -5   47.20    2.70
   7  -5  -5   37.50    3.30
  -6   4   5  168.28    7.30
   6  -4  -5  161.78    7.10
  -5   3   5  435.66   16.70
  -2   0   5   -0.40    2.20
  -2   0   5    0.10    1.20
  -2   0   5    0.00    1.30
   2   0  -5    1.00    1.10
   2   0  -5   -0.70    1.50
   2   0  -5   -1.10    1.00
  -1  -1   5    6.70    2.30
  -1  -1   5    8.80    1.70
  -1  -1   5    4.60    1.50
   1   1  -5    7.90    1.40
   1   1  -5    7.60    1.50
   0  -2   5    2.70    2.40
   0  -2   5   -3.00    1.70
   0  -2   5   -1.90    1.70
   0   2  -5   -0.20    1.60
   0   2  -5   -1.00    0.80
   0   2  -5   -0.60    1.70
   1  -3   5  614.44   23.50
   1  -3   5  612.44   23.50
   1  -3   5  603.14   25.30
  -1   3  -5  611.24   23.50
  -1   3  -5  616.54   25.10
   2  -4   5   23.20    2.90
   2  -4   5   26.00    3.00
   3  -5   5  502.25   20.00
   3  -5   5  517.75   20.00
   3  -5   5  497.55   19.80
  -3   5  -5  476.35   19.80
  -3   5  -5  501.75   19.70
  -3   5  -5  505.15   21.10
   4  -6   5   92.99    6.50
   4  -6   5   93.29    6.10
   4  -6   5   84.29    6.60
  -4   6  -5   73.59    6.10
  -4   6  -5   93.39    6.20
  -4   6  -5   79.49    5.40
   5  -7   5  171.68    9.20
   5  -7   5  187.38    9.30
   5  -7   5  153.28    9.30
  -5   7  -5  164.68    9.10
  -5   7  -5  175.48    9.00
   6  -8   5    2.60    3.80
  -6   8  -5    1.50    3.00
  -6   8  -5    0.80    3.10
   7  -9   5   50.69    5.60
  -7   9  -5   36.50    4.50
   8 -10   5  170.28   11.50
  -8  10  -5  175.18   10.40
  -8  10  -5  175.38    9.60
   9 -11   5   10.40    5.40
  -9  11  -5   16.00    3.80
  -9  11  -5   13.10    4.50
  10 -12   5  -11.80    5.20
 -10  12  -5    0.90    4.50
 -10  12  -5   -4.70    3.50
  11 -13   5   -7.20    6.20
 -11  13  -5   -1.50    4.60
  12 -14   5   19.40    6.50
 -12  14  -5   18.80    5.90
 -19  15   6    9.70    7.50
 -19  15   6   -4.10    4.90
 -19  15   6   -3.40    4.90
 -18  14   6   -0.50    4.90
 -18  14   6    6.90    4.90
 -18  14   6    1.00    6.30
 -17  13   6   -3.50    4.30
 -17  13   6   -1.60    4.30
 -17  13   6    4.70    6.30
 -16  12   6  101.19    9.40
 -16  12   6   91.19    8.10
 -16  12   6  101.59    8.60
  16 -12  -6  105.79    8.80
 -15  11   6   87.79    7.10
 -15  11   6  102.39    8.00
 -15  11   6   83.89    7.60
  15 -11  -6  104.99    8.30
 -14  10   6    2.60    3.60
 -14  10   6    3.90    3.10
 -14  10   6    4.40    3.20
  14 -10  -6    3.90    3.60
  14 -10  -6    0.20    2.70
 -13   9   6    1.10    2.80
 -13   9   6    7.30    3.00
 -13   9   6   12.20    3.40
  13  -9  -6    4.60    3.30
  13  -9  -6    3.40    2.50
 -12   8   6  358.36   14.50
 -12   8   6  353.96   14.50
 -12   8   6  347.17   14.40
  12  -8  -6  336.87   14.30
  12  -8  -6  351.26   14.30
  12  -8  -6  346.77   14.60
 -11   7   6  151.38    7.30
 -11   7   6  156.58    7.50
  11  -7  -6  140.09    7.40
  11  -7  -6  157.78    7.10
  11  -7  -6  148.09    7.50
 -10   6   6   23.30    2.40
 -10   6   6   24.80    2.50
 -10   6   6   24.90    2.90
  10  -6  -6   28.40    2.80
  10  -6  -6   28.40    2.40
  10  -6  -6   27.00    2.80
  -9   5   6  158.38    6.80
  -9   5   6  150.48    6.80
  -9   5   6  154.48    7.30
   9  -5  -6  165.88    6.90
  -8   4   6  109.49    5.60
  -7   3   6  837.92   31.30
  -6   2   6  114.19    6.60
  -5   1   6  651.33   27.70
  -4   0   6  666.63   27.20
  -4   0   6  666.53   28.20
  -3  -1   6   60.49    3.40
  -3  -1   6   62.59    3.30
  -3  -1   6   54.29    4.50
   3   1  -6   50.59    3.70
   3   1  -6   66.19    3.40
   3   1  -6   62.59    3.20
  -2  -2   6    3.60    2.30
  -2  -2   6    4.10    1.70
  -2  -2   6    5.50    1.60
   2   2  -6    6.70    1.60
   2   2  -6    4.80    1.90
   2   2  -6    0.50    0.80
  -1  -3   6  109.29    5.30
  -1  -3   6   98.09    5.40
  -1  -3   6   94.09    6.10
   1   3  -6  102.59    5.10
   1   3  -6  102.39    5.70
   1   3  -6  110.89    5.30
   0  -4   6  632.74   25.00
   0  -4   6  633.04   26.80
   0  -4   6  674.03   25.00
   0   4  -6  663.93   26.70
   0   4  -6  631.24   24.80
   0   4  -6  655.23   24.90
   1  -5   6   -1.60    2.50
   1  -5   6   -5.60    2.40
   1  -5   6    0.20    2.60
   1  -5   6    2.40    3.20
  -1   5  -6    0.40    0.50
  -1   5  -6    2.50    2.30
  -1   5  -6    0.50    2.20
   2  -6   6    1.60    2.50
   2  -6   6   -0.70    3.00
   2  -6   6    3.40    2.80
   2  -6   6   -4.40    3.40
  -2   6  -6    1.20    2.00
  -2   6  -6   -2.20    2.30
  -2   6  -6   -3.20    2.30
   3  -7   6   65.89    5.20
   3  -7   6   60.39    4.90
   3  -7   6   65.29    5.20
  -3   7  -6   63.49    5.40
  -3   7  -6   60.79    4.60
   4  -8   6  152.58    9.50
   4  -8   6  163.08    9.10
  -4   8  -6  161.48    8.70
  -4   8  -6  162.48    9.00
   5  -9   6   25.20    4.50
  -5   9  -6   22.40    3.70
  -5   9  -6   26.50    4.50
   6 -10   6    6.10    4.40
  -6  10  -6   -6.90    3.60
   7 -11   6   -1.90    5.30
  -7  11  -6    0.30    3.80
   8 -12   6   68.79    7.20
  -8  12  -6   67.09    7.00
   9 -13   6   -4.20    5.60
  -9  13  -6   -1.10    4.40
  10 -14   6   -8.80    6.40
 -10  14  -6   -1.50    5.20
 -20  14   7   15.00    5.00
 -20  14   7   10.70    7.40
 -19  13   7   -7.20    6.40
 -19  13   7    0.40    4.50
 -19  13   7    0.00    4.20
 -18  12   7    1.20    6.20
 -18  12   7   -4.70    3.90
 -18  12   7   -1.90    4.20
 -17  11   7   91.39    7.90
 -17  11   7   83.39    8.90
 -17  11   7   84.99    7.60
  17 -11  -7   97.19    8.40
 -16  10   7   -2.10    3.20
 -16  10   7    2.30    3.60
 -16  10   7   -0.10    5.30
 -16  10   7    1.40    3.40
  16 -10  -7    6.70    4.00
  16 -10  -7    0.50    3.00
 -15   9   7   82.99    6.60
 -15   9   7   77.69    6.70
 -15   9   7   78.89    8.20
 -15   9   7   91.79    6.50
  15  -9  -7   96.29    7.20
  15  -9  -7   86.69    6.40
 -14   8   7   12.40    3.20
 -14   8   7   10.50    2.70
 -14   8   7   12.90    3.10
 -14   8   7   17.90    5.30
  14  -8  -7    5.50    3.30
  14  -8  -7   14.80    2.90
 -13   7   7  324.77   16.90
 -13   7   7  339.97   13.80
 -13   7   7  332.97   13.80
 -13   7   7  330.17   13.80
  13  -7  -7  333.17   14.00
  13  -7  -7  345.27   13.70
  13  -7  -7  336.37   13.70
 -12   6   7   -1.20    2.40
 -12   6   7    5.70    3.90
 -12   6   7    5.30    2.20
  12  -6  -7    3.10    2.40
  12  -6  -7    3.80    2.00
  12  -6  -7    1.70    2.30
 -11   5   7  114.19    8.00
 -11   5   7  102.09    5.70
 -11   5   7  109.79    5.40
  11  -5  -7  104.99    5.10
  11  -5  -7  100.79    5.50
 -10   4   7  168.58    7.50
 -10   4   7  168.28    9.60
  -9   3   7   46.60    4.60
  -9   3   7   49.00    3.90
  -8   2   7  382.46   17.30
  -7   1   7  641.44   27.60
  -5  -1   7    8.60    1.50
  -5  -1   7    9.20    1.40
  -5  -1   7    6.80    2.10
   5   1  -7    8.90    1.30
   5   1  -7   10.60    2.20
   5   1  -7    8.00    1.50
  -4  -2   7   28.70    3.10
  -4  -2   7   34.70    3.00
  -4  -2   7   33.50    3.10
   4   2  -7   41.30    3.50
   4   2  -7   31.20    2.40
  -3  -3   7   70.79    4.30
  -3  -3   7   68.19    4.50
  -3  -3   7   70.59    5.40
   3   3  -7   76.89    4.60
   3   3  -7   76.19    4.10
  -2  -4   7   77.79    4.60
  -2  -4   7   66.49    4.90
  -2  -4   7   63.69    5.80
   2   4  -7   74.79    4.90
   2   4  -7   74.69    4.30
  -1  -5   7   98.39    6.30
  -1  -5   7   92.59    7.00
  -1  -5   7  101.19    5.70
   1   5  -7  116.49    6.00
   1   5  -7   93.29    6.20
   1   5  -7  102.19    5.40
   0  -6   7  625.34   25.20
   0  -6   7  683.13   25.40
   0  -6   7  649.83   25.10
   0  -6   7  630.34   27.00
   0   6  -7  616.64   26.70
   0   6  -7  660.33   25.20
   1  -7   7   67.59    5.50
   1  -7   7   77.19    7.10
   1  -7   7   57.69    4.90
  -1   7  -7   69.59    5.90
  -1   7  -7   71.89    5.50
   2  -8   7   -0.20    3.50
   2  -8   7    2.50    2.60
   2  -8   7    1.40    4.00
  -2   8  -7    2.60    2.90
  -2   8  -7    4.10    2.70
   3  -9   7   13.10    4.20
  -3   9  -7   13.70    3.40
  -3   9  -7   17.50    3.80
   4 -10   7   46.40    5.40
  -4  10  -7   41.90    4.90
   5 -11   7   16.90    5.30
  -5  11  -7   25.00    4.90
   6 -12   7    1.80    5.40
  -6  12  -7   -0.80    4.60
   7 -13   7   48.40    7.40
  -7  13  -7   36.50    5.70
   8 -14   7    4.50    6.70
  -8  14  -7   -2.00    4.70
 -21  13   8    5.40    7.20
 -20  12   8    0.20    4.20
 -20  12   8   -4.40    6.70
 -19  11   8   15.80    6.90
 -19  11   8   16.80    4.30
 -18  10   8    6.20    3.80
 -18  10   8    3.00    6.20
  18 -10  -8   12.80    4.20
  18 -10  -8    3.00    3.30
 -17   9   8   39.80    6.80
 -17   9   8   31.20    4.10
 -17   9   8   31.00    4.10
  17  -9  -8   37.90    3.90
  17  -9  -8   34.70    4.40
 -16   8   8   34.00    6.60
 -16   8   8   40.20    4.00
 -16   8   8   39.70    4.00
  16  -8  -8   38.50    3.90
  16  -8  -8   41.10    4.40
 -15   7   8   43.50    3.90
 -15   7   8   57.39    6.60
 -15   7   8   48.40    4.00
  15  -7  -8   52.69    4.30
  15  -7  -8   43.80    3.90
 -14   6   8   39.10    3.50
 -14   6   8   40.20    3.50
 -14   6   8   35.90    5.40
  14  -6  -8   31.40    3.10
  14  -6  -8   50.79    3.80
 -13   5   8  361.96   13.80
 -13   5   8  357.16   13.90
 -13   5   8  392.86   17.30
  13  -5  -8  337.27   13.90
  13  -5  -8  296.27   13.60
 -12   4   8  346.47   14.20
 -12   4   8  373.96   17.30
 -11   3   8   25.70    4.10
 -11   3   8   20.30    2.50
 -10   2   8   14.40    2.50
 -10   2   8   10.40    3.50
  -8   0   8 2261.17   94.29
  -7  -1   8   12.50    3.00
  -7  -1   8   21.50    1.80
   7   1  -8   22.20    3.20
  -6  -2   8  147.69    6.50
  -6  -2   8  144.99    6.60
   6   2  -8  152.48    6.40
   6   2  -8  149.49    7.70
   6   2  -8  150.38    6.60
  -5  -3   8   66.19    4.20
  -5  -3   8   64.89    4.50
  -5  -3   8   73.19    5.90
   5   3  -8   71.89    4.10
   5   3  -8   60.39    4.30
   5   3  -8   58.89    4.60
  -4  -4   8  301.97   12.00
  -4  -4   8  294.17   12.10
  -4  -4   8  283.17   13.30
   4   4  -8  298.37   12.10
   4   4  -8  291.57   11.80
  -3  -5   8  140.19    7.50
  -3  -5   8  148.49    7.20
  -3  -5   8  142.59    8.40
   3   5  -8  142.09    7.40
   3   5  -8  151.08    6.90
  -2  -6   8  135.09    7.20
  -2  -6   8  126.59    7.60
  -2  -6   8  134.69    8.20
  -2  -6   8  146.49    8.00
   2   6  -8  149.39    7.60
   2   6  -8  135.09    6.80
  -1  -7   8  126.99    7.00
  -1  -7   8  117.59    8.20
  -1  -7   8  106.99    7.60
   1   7  -8  122.19    7.30
   0  -8   8   34.50    4.50
   0  -8   8   48.90    5.20
   0  -8   8   41.40    4.30
   0   8  -8   37.60    4.20
   1  -9   8   48.10    5.80
   1  -9   8   47.20    5.00
  -1   9  -8   51.39    5.00
   2 -10   8   -2.50    4.50
  -2  10  -8   -2.70    3.50
   3 -11   8   48.70    6.10
  -3  11  -8   53.89    5.70
   4 -12   8   24.00    5.50
  -4  12  -8   29.60    5.40
   5 -13   8   33.90    6.60
  -5  13  -8   38.60    5.90
   6 -14   8    2.70    5.90
  -6  14  -8    0.00    5.00
   7 -15   8   -0.40    6.00
  -7  15  -8    9.00    5.30
 -22  12   9    1.40    7.30
 -21  11   9    4.30    7.10
 -21  11   9    5.70    4.10
 -20  10   9   48.30    4.90
 -20  10   9   51.79    8.20
 -19   9   9   24.20    7.00
 -19   9   9   26.10    4.00
  19  -9  -9   32.80    4.80
 -18   8   9    1.50    3.10
 -18   8   9   -8.70    5.70
 -18   8   9   -2.90    3.10
  18  -8  -9    2.80    3.70
 -17   7   9   -1.50    2.80
 -17   7   9    1.10    5.50
 -17   7   9    0.30    2.90
  17  -7  -9   -1.20    3.30
 -16   6   9  347.17   18.50
 -16   6   9  364.06   14.70
  16  -6  -9  357.76   14.80
  16  -6  -9  347.37   14.50
 -15   5   9    2.70    2.60
 -15   5   9   -1.40    4.20
  15  -5  -9    2.40    2.40
  15  -5  -9    3.10    2.20
 -14   4   9    5.80    2.30
 -14   4   9   13.40    4.20
 -14   4   9    8.80    2.40
 -13   3   9   71.49    6.20
 -13   3   9   67.19    4.50
 -12   2   9  189.88   10.30
 -12   2   9  165.88    7.90
 -11   1   9  147.29    9.10
 -10   0   9  -10.90    3.20
  10   0  -9    3.90    2.90
  -9  -1   9  674.53   29.10
  -9  -1   9  638.54   25.20
  -9  -1   9  670.93   25.20
   9   1  -9  673.93   29.00
   9   1  -9  654.63   25.10
   9   1  -9  692.53   25.20
  -8  -2   9  653.93   25.60
  -8  -2   9  686.73   29.30
  -8  -2   9  671.13   25.60
   8   2  -9  686.63   25.60
   8   2  -9  680.13   25.60
  -7  -3   9  714.53   26.70
  -7  -3   9  694.13   26.70
   7   3  -9  667.63   26.60
   7   3  -9  730.93   26.70
  -6  -4   9    4.40    2.40
  -6  -4   9   -1.70    3.40
  -6  -4   9    1.10    2.00
   6   4  -9    4.40    1.80
   6   4  -9    4.50    2.30
   6   4  -9    3.50    2.10
  -5  -5   9  220.08   11.30
  -5  -5   9  216.88   10.10
  -5  -5   9  241.48    9.90
   5   5  -9  219.38    9.70
   5   5  -9  225.58   10.70
   5   5  -9  232.38   10.00
  -4  -6   9    4.30    3.00
  -4  -6   9    8.20    3.70
  -4  -6   9    5.20    2.60
  -4  -6   9    6.20    2.80
   4   6  -9    6.60    2.20
   4   6  -9   12.10    2.90
  -3  -7   9  362.16   14.50
  -3  -7   9  335.27   15.90
  -3  -7   9  325.97   14.80
   3   7  -9  355.56   14.80
  -2  -8   9   -7.80    2.60
  -2  -8   9   -4.60    3.90
  -2  -8   9   -9.80    3.30
   2   8  -9   -6.60    3.00
  -1  -9   9    5.00    3.40
  -1  -9   9    7.80    3.90
  -1  -9   9    4.80    4.50
   1   9  -9   12.10    3.60
   0 -10   9    0.70    4.60
   0 -10   9   -4.60    4.40
   0  10  -9   -4.30    3.60
   1 -11   9    3.20    4.80
   1 -11   9    0.90    5.00
  -1  11  -9    3.80    4.10
   2 -12   9    9.50    5.30
  -2  12  -9    4.00    4.20
   3 -13   9   -3.40    5.30
  -3  13  -9   -6.80    4.10
   4 -14   9   28.30    6.40
  -4  14  -9   42.60    6.20
   5 -15   9    0.90    6.40
  -5  15  -9    3.60    5.20
 -23  11  10    1.50    7.80
 -22  10  10   12.50    7.50
 -21   9  10    4.60    7.00
 -20   8  10   60.59    8.50
 -19   7  10   12.10    6.30
 -19   7  10   11.80    3.70
  19  -7 -10   15.50    3.70
 -18   6  10   17.40    5.80
 -18   6  10   18.10    3.50
  18  -6 -10   11.80    3.20
 -17   5  10   43.20    6.30
 -17   5  10   39.60    3.80
 -17   5  10   26.50    3.70
  17  -5 -10   24.30    3.10
  17  -5 -10   32.60    3.30
 -16   4  10  100.29    6.40
 -16   4  10  116.09    9.70
 -16   4  10   94.99    6.40
 -15   3  10   67.99    5.20
 -15   3  10   71.69    6.60
 -14   2  10    6.50    4.00
 -13   1  10   23.20    4.30
 -12   0  10   34.60    4.80
  12   0 -10   30.80    4.00
 -11  -1  10   13.80    2.20
 -11  -1  10   17.60    2.40
 -11  -1  10   16.90    4.20
  11   1 -10   18.30    2.30
  11   1 -10   20.80    3.80
  11   1 -10   22.50    2.00
 -10  -2  10  138.89    6.60
 -10  -2  10  138.39    8.80
 -10  -2  10  145.69    6.80
  10   2 -10  139.19    8.50
  10   2 -10  143.69    6.50
  10   2 -10  147.59    6.50
  -9  -3  10  480.85   18.70
  -9  -3  10  466.45   18.70
   9   3 -10  484.35   18.70
   9   3 -10  491.75   18.60
   9   3 -10  478.65   21.40
  -8  -4  10   11.00    2.70
  -8  -4  10    9.10    2.30
   8   4 -10   13.70    2.90
   8   4 -10   13.60    2.40
   8   4 -10    6.50    2.00
  -7  -5  10  257.37   10.80
  -7  -5  10  255.37   12.70
  -7  -5  10  247.58   11.20
   7   5 -10  259.37   10.70
   7   5 -10  226.18   11.90
   7   5 -10  272.67   11.10
  -6  -6  10   29.70    3.30
  -6  -6  10   29.40    3.70
  -6  -6  10   38.30    4.50
  -6  -6  10   29.80    3.90
   6   6 -10   37.40    3.70
  -5  -7  10   61.79    5.00
  -5  -7  10   71.29    5.70
  -5  -7  10   77.79    6.00
   5   7 -10   70.49    6.10
  -4  -8  10  190.88   11.20
  -4  -8  10  192.58    9.60
  -4  -8  10  183.18   10.20
   4   8 -10  201.48   10.00
  -3  -9  10    8.10    3.20
  -3  -9  10    9.50    4.00
  -3  -9  10   11.70    4.60
   3   9 -10   12.60    4.10
  -2 -10  10   -1.50    4.60
  -2 -10  10   -1.30    4.40
   2  10 -10   -7.90    3.60
  -1 -11  10   50.49    6.10
  -1 -11  10   41.00    5.70
   1  11 -10   39.10    5.30
   0 -12  10   74.59    7.20
   0 -12  10   63.69    7.00
   0  12 -10   61.29    6.50
   1 -13  10    1.30    5.40
  -1  13 -10    8.70    4.60
   2 -14  10    7.60    6.00
  -2  14 -10    6.80    5.10
   3 -15  10  -11.70    6.10
  -3  15 -10   -1.30    4.80
 -24  10  11   22.10    9.10
 -23   9  11   -4.60    7.40
 -22   8  11    2.10    7.30
 -22   8  11    2.20    4.40
 -21   7  11   31.80    4.60
 -21   7  11   33.30    7.30
 -20   6  11   13.30    3.90
 -20   6  11   13.90    4.10
 -20   6  11   13.50    6.30
  20  -6 -11   18.30    3.50
 -19   5  11   21.60    3.80
 -19   5  11   20.00    3.70
 -19   5  11   23.60    6.50
  19  -5 -11   18.80    3.20
 -18   4  11   -0.30    5.00
 -18   4  11   -8.00    3.00
 -18   4  11   -4.40    2.90
 -17   3  11  116.89    7.30
 -17   3  11  128.09    7.30
 -17   3  11  149.99   10.90
 -16   2  11    2.20    4.50
 -16   2  11   -2.90    2.60
 -16   2  11   -0.40    2.70
 -15   1  11   55.99    6.20
 -15   1  11   48.30    3.60
 -14   0  11   -2.50    4.00
 -14   0  11   -7.40    2.30
 -14   0  11   -1.80    2.40
  14   0 -11   -1.10    3.10
 -13  -1  11   73.59    5.30
 -13  -1  11   77.69    5.10
 -13  -1  11   90.99    8.20
  13   1 -11   76.49    4.40
  13   1 -11   67.99    5.00
  13   1 -11   79.79    7.10
 -12  -2  11   63.49    5.00
 -12  -2  11   57.39    5.80
 -12  -2  11   63.89    4.70
  12   2 -11   62.69    4.20
  12   2 -11   67.29    4.60
  12   2 -11   66.29    6.20
 -11  -3  11    5.70    2.60
 -11  -3  11    7.70    2.30
  11   3 -11    5.90    2.10
  11   3 -11    2.10    3.20
  11   3 -11    4.70    2.00
 -10  -4  11    1.40    2.30
 -10  -4  11   -0.20    2.60
  10   4 -11   -2.80    1.90
  10   4 -11   -1.50    2.80
  10   4 -11   -5.60    2.10
  -9  -5  11  131.39    7.50
  -9  -5  11  133.39    6.90
  -9  -5  11  122.19    7.70
   9   5 -11  138.69    7.00
   9   5 -11  120.89    7.80
   9   5 -11  137.19    7.00
  -8  -6  11  294.57   12.60
  -8  -6  11  295.37   14.50
  -8  -6  11  282.67   13.00
   8   6 -11  284.87   14.00
   8   6 -11  306.97   12.80
  -7  -7  11    9.70    3.50
  -7  -7  11    8.90    2.90
  -7  -7  11   11.70    4.40
   7   7 -11    8.10    3.20
   7   7 -11    9.30    3.10
  -6  -8  11    3.70    3.00
  -6  -8  11    3.30    3.60
  -6  -8  11    7.10    4.30
   6   8 -11    3.80    3.30
   6   8 -11    3.40    3.00
  -5  -9  11   16.90    4.90
  -5  -9  11   13.30    4.20
  -5  -9  11   13.60    3.70
   5   9 -11   16.40    3.90
  -4 -10  11   68.59    6.50
  -4 -10  11   72.69    6.50
   4  10 -11   70.39    6.00
  -3 -11  11   24.60    5.50
  -3 -11  11   25.40    5.30
   3  11 -11   21.30    5.00
  -2 -12  11   -0.40    4.70
  -2 -12  11    7.60    5.30
   2  12 -11    7.70    4.80
  -1 -13  11    5.70    5.40
  -1 -13  11   -7.20    5.30
   1  13 -11    5.00    4.90
   0 -14  11   20.80    6.60
   0  14 -11   20.20    5.20
   1 -15  11   16.10    6.90
  -1  15 -11   15.10    5.40
 -25   9  12   18.70    5.20
 -25   9  12   23.30    8.40
 -24   8  12    2.10    4.50
 -24   8  12    0.70    7.10
 -23   7  12   29.60    4.70
 -23   7  12   14.60    7.50
 -22   6  12    7.40    4.00
 -22   6  12   -1.20    6.40
 -21   5  12   12.40    3.90
 -21   5  12   12.80    7.00
 -20   4  12   18.80    6.40
 -20   4  12   19.40    3.80
 -20   4  12   15.50    3.70
  20  -4 -12   16.50    3.10
 -19   3  12   29.20    6.50
 -19   3  12   25.70    3.80
 -19   3  12   24.20    3.70
 -18   2  12    7.10    3.10
 -18   2  12   18.80    5.80
 -18   2  12    6.30    3.30
 -17   1  12   29.50    3.60
 -17   1  12   37.90    6.30
 -17   1  12   29.60    3.60
 -16   0  12  370.16   15.50
 -16   0  12  377.96   15.50
 -16   0  12  392.86   19.40
 -15  -1  12    9.50    2.70
 -15  -1  12    4.90    2.90
 -15  -1  12   11.70    4.80
  15   1 -12    6.90    2.00
  15   1 -12    9.60    2.60
 -14  -2  12   -3.50    2.40
 -14  -2  12    4.30    2.80
 -14  -2  12    2.90    4.50
  14   2 -12    0.70    3.20
  14   2 -12    4.20    2.40
  14   2 -12    1.00    1.90
 -13  -3  12   -9.40    2.90
  13   3 -12   -6.20    2.00
  13   3 -12   -9.30    2.30
  13   3 -12   -0.40    3.60
 -12  -4  12  154.18    7.60
 -12  -4  12  150.48    8.10
  12   4 -12  159.58    7.60
  12   4 -12  135.79    9.50
 -11  -5  12   51.99    4.50
 -11  -5  12   49.80    4.60
 -11  -5  12   56.39    5.00
  11   5 -12   56.79    5.30
  11   5 -12   58.39    5.10
 -10  -6  12   -0.40    3.30
 -10  -6  12    7.40    4.50
 -10  -6  12    1.40    2.70
  10   6 -12    1.90    2.60
  10   6 -12    3.10    3.20
  -9  -7  12    1.10    3.60
  -9  -7  12    4.60    4.40
  -9  -7  12    2.50    2.90
   9   7 -12    3.10    3.00
   9   7 -12    5.00    3.30
  -8  -8  12  146.99    9.30
  -8  -8  12  148.59    8.40
  -8  -8  12  144.49   10.40
   8   8 -12  149.09    8.50
   8   8 -12  136.29    8.80
  -7  -9  12   28.90    4.70
  -7  -9  12   29.40    3.90
  -7  -9  12   39.10    5.60
   7   9 -12   36.00    4.70
   7   9 -12   24.90    4.10
  -6 -10  12    1.50    4.80
  -6 -10  12   -3.50    4.30
   6  10 -12   -4.80    3.10
   6  10 -12    1.50    3.80
  -5 -11  12   34.10    5.90
  -5 -11  12   35.40    5.50
   5  11 -12   38.20    5.30
  -4 -12  12   -0.70    5.10
  -4 -12  12    6.20    5.20
   4  12 -12    2.40    4.50
  -3 -13  12   25.20    6.20
  -3 -13  12   28.90    6.20
   3  13 -12   31.50    5.60
  -2 -14  12   -1.90    5.60
  -2 -14  12    5.70    5.90
   2  14 -12    3.80    4.90
  -1 -15  12   12.60    6.10
   1  15 -12   13.70    5.40
 -26   8  13    7.10    8.80
 -26   8  13    6.20    4.80
 -25   7  13    9.60    4.70
 -25   7  13    7.80    8.00
 -24   6  13   39.00    8.50
 -24   6  13   25.10    4.90
 -23   5  13    4.30    4.00
 -23   5  13   -0.60    7.00
 -22   4  13   -2.70    7.20
 -22   4  13   -0.50    3.70
 -21   3  13   -3.80    6.30
 -21   3  13   -0.10    3.60
 -20   2  13   76.39    6.80
 -20   2  13   69.99    8.40
 -20   2  13   77.59    6.60
 -19   1  13   16.10    6.50
 -19   1  13    9.00    3.50
 -19   1  13    8.90    3.30
 -18   0  13   -4.40    5.60
 -18   0  13    0.00    3.20
 -18   0  13   -0.80    3.30
 -17  -1  13   32.90    6.40
 -17  -1  13   25.30    3.60
 -17  -1  13   23.10    3.70
  17   1 -13   29.20    2.80
 -16  -2  13   52.29    4.50
 -16  -2  13   48.60    4.10
  16   2 -13   52.89    4.50
 -15  -3  13   41.70    4.30
 -15  -3  13   44.40    3.90
  15   3 -13   48.50    3.60
 -14  -4  13    5.00    3.10
 -14  -4  13    2.80    3.40
 -14  -4  13    2.40    2.80
  14   4 -13    2.90    2.50
 -13  -5  13   67.19    5.80
 -13  -5  13   78.49    6.80
 -13  -5  13   75.99    6.50
  13   5 -13   79.49    5.90
  13   5 -13   79.59    7.40
 -12  -6  13    4.50    3.80
 -12  -6  13    3.90    3.10
  12   6 -13    0.90    2.70
  12   6 -13    1.50    3.50
 -11  -7  13  115.39    9.80
 -11  -7  13  119.89    8.60
 -11  -7  13  112.19    7.40
  11   7 -13  109.49    7.50
  11   7 -13  113.49    8.30
 -10  -8  13    7.30    3.30
 -10  -8  13    1.60    4.20
 -10  -8  13   -1.70    4.60
  10   8 -13    1.80    3.30
  10   8 -13   -2.60    3.30
  -9  -9  13   58.09    5.70
  -9  -9  13   61.69    6.60
  -9  -9  13   51.69    5.00
   9   9 -13   52.89    5.20
   9   9 -13   80.79    6.80
  -8 -10  13   18.50    5.40
  -8 -10  13   14.10    4.90
   8  10 -13   11.80    3.80
   8  10 -13   10.10    4.00
  -7 -11  13   32.80    6.20
  -7 -11  13   32.50    5.60
   7  11 -13   34.80    5.10
  -6 -12  13   -0.40    5.30
  -6 -12  13   -2.60    5.00
   6  12 -13   -1.70    4.40
  -5 -13  13   18.00    5.80
  -5 -13  13   10.60    5.90
   5  13 -13    0.00    4.80
  -4 -14  13   18.20    6.30
  -4 -14  13   12.60    6.30
   4  14 -13    9.40    5.50
  -3 -15  13   -2.80    6.00
  -3 -15  13    6.40    6.30
   3  15 -13    7.10    5.60
 -27   7  14   15.00    9.50
 -27   7  14   -0.20    4.70
 -26   6  14   12.90    4.60
 -26   6  14   -3.50    8.10
 -25   5  14    3.00    4.30
 -25   5  14   -3.10    8.20
 -24   4  14   18.10    8.50
 -24   4  14   14.10    4.30
 -23   3  14   -2.20    3.90
 -23   3  14    3.70    7.50
 -22   2  14    6.50    3.90
 -22   2  14   -0.70    7.30
 -21   1  14   21.30    7.70
 -21   1  14   14.10    4.00
 -20   0  14   43.50    4.60
 -20   0  14   43.80    4.40
 -20   0  14   49.40    7.70
  20   0 -14   32.90    3.30
 -19  -1  14   48.60    7.50
 -19  -1  14   48.80    4.40
 -19  -1  14   43.40    4.40
  19   1 -14   33.70    3.30
 -18  -2  14    2.00    3.20
 -18  -2  14   -1.00    2.50
 -18  -2  14    3.90    3.70
  18   2 -14   -0.90    2.30
 -17  -3  14    1.10    2.60
 -17  -3  14    1.20    3.70
 -17  -3  14    3.70    3.20
  17   3 -14    6.70    2.40
 -16  -4  14    1.10    2.90
 -16  -4  14    4.40    3.80
 -16  -4  14   -1.30    3.00
  16   4 -14    2.50    2.50
 -15  -5  14    8.40    3.50
 -15  -5  14    2.30    3.70
  15   5 -14    3.20    2.70
 -14  -6  14   -1.90    3.10
 -14  -6  14   -0.90    3.90
  14   6 -14    0.50    2.80
 -13  -7  14    7.60    4.40
 -13  -7  14    9.40    3.60
  13   7 -14    5.00    3.10
 -12  -8  14   19.90    4.70
 -12  -8  14   13.90    3.80
 -12  -8  14   20.30    5.90
  12   8 -14   11.70    3.70
 -11  -9  14    6.30    3.60
 -11  -9  14   -0.60    5.10
 -11  -9  14    2.30    4.50
  11   9 -14    0.40    3.50
 -10 -10  14    6.30    5.30
 -10 -10  14    4.40    4.70
  10  10 -14    4.10    3.90
  -9 -11  14    5.90    5.10
  -9 -11  14    8.20    5.60
   9  11 -14    5.10    4.30
  -8 -12  14   32.10    6.40
  -8 -12  14   40.70    6.20
   8  12 -14   39.10    5.80
  -7 -13  14    3.90    5.50
  -7 -13  14    2.40    5.80
   7  13 -14   -0.50    4.90
  -6 -14  14    1.00    6.00
  -6 -14  14    4.70    6.00
   6  14 -14   -0.60    5.00
 -27   5  15    4.80    4.60
 -27   5  15    3.50    9.60
 -26   4  15    1.10    8.50
 -26   4  15    2.00    4.40
 -25   3  15    8.00    9.00
 -25   3  15    6.60    4.40
 -24   2  15    7.70    8.40
 -24   2  15    5.40    4.20
 -23   1  15   10.90    4.30
 -23   1  15   15.00    7.50
 -22   0  15   -8.80    3.90
 -22   0  15   -3.70    6.70
 -21  -1  15   42.50    7.90
 -21  -1  15   32.60    4.60
 -20  -2  15   -4.40    3.80
 -19  -3  15   29.90    3.70
 -19  -3  15   34.20    4.70
  19   3 -15   31.20    3.40
 -18  -4  15   -3.20    4.00
 -18  -4  15   -0.40    3.00
  18   4 -15   -0.30    2.50
 -17  -5  15   20.70    4.40
  17   5 -15   18.80    3.40
 -16  -6  15    3.80    4.20
  16   6 -15    8.70    3.10
 -15  -7  15    3.80    4.40
  15   7 -15    3.00    3.10
 -14  -8  15    2.80    4.70
 -14  -8  15   -0.20    5.50
  14   8 -15    3.40    3.30
 -13  -9  15   11.60    6.20
 -13  -9  15    5.10    4.90
  13   9 -15    6.20    3.70
 -12 -10  15   78.89    7.30
 -12 -10  15   77.09    8.00
  12  10 -15   91.99    8.00
 -11 -11  15    5.10    6.00
 -11 -11  15    2.70    5.20
  11  11 -15    3.80    4.20
 -10 -12  15    0.50    5.60
 -10 -12  15    8.60    6.10
  10  12 -15    4.30    4.60
  -9 -13  15   -0.50    5.80
  -9 -13  15    0.20    5.60
   9  13 -15   -1.40    4.80
  -8 -14  15    5.40    6.30
  -8 -14  15    3.20    6.00
   8  14 -15    0.40    5.50
 -27   3  16    3.90    8.50
 -27   3  16    2.80    4.70
 -26   2  16   -4.20    4.40
 -26   2  16   -7.20    8.20
 -25   1  16   18.30    4.60
 -25   1  16   28.20    8.50
 -24   0  16   13.90    7.70
 -24   0  16    6.30    4.40
 -23  -1  16   27.60    4.80
 -22  -2  16    0.80    4.20
 -21  -3  16   -2.10    4.30
 -20  -4  16   39.80    5.20
 -19  -5  16    2.80    4.40
 -18  -6  16    1.30    4.50
 -17  -7  16    6.50    4.80
 -16  -8  16   63.09    6.50
 -15  -9  16   20.30    5.50
 -15  -9  16   23.40    6.60
 -14 -10  16   10.40    6.00
 -14 -10  16   -3.70    5.20
 -13 -11  16    1.80    6.00
 -13 -11  16   -1.40    5.30
 -12 -12  16   -0.80    5.70
 -12 -12  16   -5.20    6.20
 -11 -13  16   13.00    6.40
 -11 -13  16   22.80    6.70
 -27   1  17    2.80    9.00
 -27   1  17    0.60    4.70
 -26   0  17    1.80    4.50
 -25  -1  17   -5.40    4.40
 -24  -2  17   25.50    5.00
 -23  -3  17   -5.10    4.50
 -22  -4  17    6.00    4.70
 -21  -5  17   -8.90    4.30
 -20  -6  17    7.90    4.90
 -19  -7  17   12.30    5.10
 -18  -8  17   -3.10    5.00
 -17  -9  17   -4.50    6.20
 -17  -9  17    1.50    5.40
 -16 -10  17   -0.90    6.30
 -16 -10  17    8.10    5.60
 -15 -11  17    3.50    6.80
 -15 -11  17   10.80    5.80
 -14 -12  17    2.00    5.90
 -14 -12  17   -0.10    6.60
 -26  -2  18   -0.70    4.70
 -25  -3  18   13.80    5.10
 -24  -4  18    8.10    5.10
 -23  -5  18   10.80    5.20
 -22  -6  18    1.20    5.00
 -21  -7  18    4.30    5.30
 -20  -8  18    2.50    5.40
 -19  -9  18    1.10    5.70
 -18 -10  18   -9.90    6.40
 -18 -10  18   -0.90    5.70
  20  14 -12    2.90    4.70
 -20 -14  12   -0.90    6.10
  21  13 -12    7.90    5.10
 -21 -13  12   10.40    6.30
  22  12 -12   -2.40    4.80
 -22 -12  12    2.60    5.80
  23  11 -12    0.10    4.90
 -23 -11  12   10.50    6.10
  24  10 -12   -7.60    4.70
 -24 -10  12    4.80    5.50
  25   9 -12   10.00    5.00
 -25  -9  12    6.90    5.80
 -26  -8  12   -4.40    5.60
 -27  -7  12    3.90    5.70
  16  16 -11   -4.30    4.70
 -16 -16  11    4.90    6.90
  17  15 -11    6.10    4.70
 -17 -15  11   13.40    6.00
  18  14 -11   -4.20    4.60
 -18 -14  11   -5.90    5.50
  19  13 -11    1.10    4.50
 -19 -13  11    3.20    5.60
  20  12 -11    9.10    5.00
 -20 -12  11   14.70    5.90
  21  11 -11   22.50    5.10
 -21 -11  11   31.30    6.40
  22  10 -11   11.20    5.00
 -22 -10  11   20.90    5.80
  23   9 -11    9.40    4.60
 -23  -9  11   13.60    5.90
  24   8 -11    6.50    4.50
 -24  -8  11    7.40    5.30
  25   7 -11    3.70    4.60
 -25  -7  11   12.90    5.80
  26   6 -11   19.60    5.30
 -26  -6  11   34.70    6.20
 -27  -5  11    4.80    5.30
 -28  -4  11    4.20    5.40
  13  17 -10   10.70    5.80
 -13 -17  10   21.10    6.60
  14  16 -10    4.20    4.60
 -14 -16  10   14.80    6.00
  15  15 -10    4.20    4.70
 -15 -15  10   12.80    6.00
  16  14 -10    0.70    4.30
 -16 -14  10    5.20    5.50
  17  13 -10   18.00    4.80
 -17 -13  10   24.70    5.80
  18  12 -10   48.00    5.70
 -18 -12  10   62.19    7.30
  19  11 -10    4.10    4.30
 -19 -11  10    7.90    5.10
  20  10 -10   -3.70    3.90
 -20 -10  10    0.80    5.10
  21   9 -10   -1.90    3.90
 -21  -9  10   -0.70    4.90
  22   8 -10   42.40    5.50
 -22  -8  10   63.99    6.80
  23   7 -10   -5.40    4.30
 -23  -7  10   -5.30    5.00
  24   6 -10    1.40    4.40
 -24  -6  10    2.40    4.90
  25   5 -10    4.00    4.50
 -25  -5  10    5.70    5.10
  26   4 -10   23.20    5.50
 -26  -4  10   23.30    5.60
  27   3 -10   12.40    5.30
 -27  -3  10   14.10    5.50
 -28  -2  10    3.90    5.40
  10  18  -9    2.60    5.00
 -10 -18   9    5.40    6.00
  11  17  -9   -2.40    5.30
  11  17  -9   -5.20    5.10
 -11 -17   9   -2.80    6.40
  12  16  -9   -5.40    4.20
  12  16  -9   -6.00    4.90
 -12 -16   9   -0.30    5.90
  13  15  -9    3.60    4.80
  13  15  -9    2.30    4.30
 -13 -15   9    0.70    5.60
  14  14  -9   41.80    5.80
  14  14  -9   42.60    5.60
 -14 -14   9   39.70    6.10
  15  13  -9   11.70    4.30
  15  13  -9   22.00    4.60
 -15 -13   9   10.20    5.30
  16  12  -9    5.70    4.40
  16  12  -9   -2.30    3.80
 -16 -12   9   -1.00    4.90
  17  11  -9   -3.30    3.80
 -17 -11   9   -1.50    4.90
  18  10  -9   73.29    6.20
 -18 -10   9   71.39    5.90
 -18 -10   9   84.89    6.90
  19   9  -9   35.00    5.20
 -19  -9   9   21.50    3.30
 -19  -9   9   27.00    5.20
  20   8  -9   -3.80    3.70
 -20  -8   9   -0.90    4.50
  21   7  -9    6.40    4.50
 -21  -7   9   10.70    4.80
  22   6  -9    4.80    4.40
 -22  -6   9    3.00    4.60
  23   5  -9   51.59    5.90
 -23  -5   9   57.89    6.30
  24   4  -9    2.30    4.60
 -24  -4   9    2.50    4.90
  25   3  -9    5.40    4.40
 -25  -3   9    2.60    5.10
  26   2  -9   -0.50    4.80
 -26  -2   9    8.70    5.30
  27   1  -9    7.80    5.40
 -27  -1   9   17.40    5.40
 -28   0   9    7.00    5.40
   8  18  -8   -9.40    5.00
   8  18  -8   -1.80    5.90
  -8 -18   8    6.40    6.50
   9  17  -8    0.80    4.70
   9  17  -8   -5.00    5.40
  -9 -17   8  -11.60    5.70
  10  16  -8   18.20    5.50
  10  16  -8   21.90    5.60
 -10 -16   8   27.30    6.40
 -10 -16   8   22.10    5.00
  11  15  -8    6.40    4.50
  11  15  -8    3.20    4.70
 -11 -15   8    7.20    5.20
  12  14  -8   57.39    6.30
  12  14  -8   34.40    5.00
 -12 -14   8   53.89    6.70
  13  13  -8   -1.90    4.20
  13  13  -8   -3.60    3.90
 -13 -13   8   -6.90    4.80
  14  12  -8   22.00    4.50
  14  12  -8   23.20    4.80
 -14 -12   8   22.20    5.00
  15  11  -8   56.59    5.60
  15  11  -8   68.79    6.10
 -15 -11   8   71.59    6.90
  16  10  -8    3.40    3.60
  16  10  -8    3.00    3.10
 -16 -10   8   -0.90    2.40
 -16 -10   8   -0.90    4.20
  17   9  -8   35.00    4.00
  17   9  -8   35.60    4.80
 -17  -9   8   32.30    5.20
 -17  -9   8   23.90    3.20
  18   8  -8    7.10    3.70
 -18  -8   8    7.00    4.40
  19   7  -8    4.30    3.80
 -19  -7   8    3.70    4.40
  20   6  -8   -1.30    3.80
 -20  -6   8   -4.30    3.90
  21   5  -8  138.79    9.40
 -21  -5   8  140.09    9.80
  22   4  -8   11.50    4.40
 -22  -4   8   16.00    4.70
  23   3  -8  124.99    9.60
 -23  -3   8  116.59    9.60
  24   2  -8   -2.90    4.50
 -24  -2   8   -3.20    4.60
  25   1  -8   18.60    5.20
 -25  -1   8   20.20    5.30
  26   0  -8   23.30    5.70
 -26   0   8   32.70    6.10
  27  -1  -8    9.20    5.60
 -27   1   8    7.90    5.40
 -28   2   8    3.30    5.60
   5  19  -7    0.00    5.50
   5  19  -7    3.60    6.50
  -5 -19   7   -0.10    6.00
   6  18  -7   25.00    5.60
   6  18  -7   16.70    6.50
  -6 -18   7   29.90    6.70
   7  17  -7    0.60    5.40
   7  17  -7    1.20    5.10
  -7 -17   7    4.90    6.00
   8  16  -7   -2.20    4.80
   8  16  -7   -2.20    5.00
  -8 -16   7    5.50    4.00
  -8 -16   7   -6.00    5.20
   9  15  -7   35.40    5.40
   9  15  -7   42.90    6.30
  -9 -15   7   31.30    5.70
  10  14  -7   58.09    6.00
  10  14  -7   60.59    6.70
 -10 -14   7   64.39    6.70
  11  13  -7   14.10    4.50
  11  13  -7   10.30    4.10
 -11 -13   7   15.90    5.00
  12  12  -7    0.70    3.80
  12  12  -7   -3.50    3.60
 -12 -12   7   -4.10    4.50
  13  11  -7   30.30    4.50
  13  11  -7   32.60    4.50
 -13 -11   7   32.70    5.20
  14  10  -7   -1.60    3.50
  14  10  -7   -1.60    3.20
 -14 -10   7    1.40    4.00
 -14 -10   7   -1.20    2.60
  15   9  -7   90.09    6.40
  15   9  -7   81.99    6.40
 -15  -9   7   75.19    5.70
 -15  -9   7   87.09    6.60
  16   8  -7   18.40    3.10
  16   8  -7   15.60    4.10
 -16  -8   7   13.90    2.60
 -16  -8   7   18.90    4.50
  17   7  -7  109.69    7.90
 -17  -7   7  105.29    8.40
  18   6  -7   83.59    7.50
 -18  -6   7   88.49    7.80
  19   5  -7   35.40    4.70
 -19  -5   7   37.10    5.00
  20   4  -7   -3.30    3.60
 -20  -4   7   -4.00    3.90
  21   3  -7   30.60    4.90
 -21  -3   7   33.80    4.90
  22   2  -7  191.48   11.70
 -22  -2   7  196.08   11.50
  23   1  -7   56.39    6.50
 -23  -1   7   68.79    6.70
  24   0  -7   -1.20    4.70
 -24   0   7    0.30    4.60
  25  -1  -7   -0.70    4.80
 -25   1   7    5.40    4.90
  26  -2  -7   35.30    6.20
 -26   2   7   26.50    5.90
 -27   3   7    8.80    5.50
   3  19  -6   11.90    6.60
   3  19  -6    6.60    5.80
  -3 -19   6    6.90    6.40
   4  18  -6    1.10    5.80
   4  18  -6    6.10    5.00
  -4 -18   6    2.60    5.60
   5  17  -6   16.60    5.30
   5  17  -6   18.80    6.00
  -5 -17   6   14.00    5.50
   6  16  -6   -0.60    4.50
   6  16  -6    6.60    5.50
  -6 -16   6   -5.10    4.90
   7  15  -6  128.99    9.60
   7  15  -6  124.69    9.90
  -7 -15   6  117.19   10.10
  -7 -15   6  108.69    7.90
   8  14  -6   -1.40    4.30
   8  14  -6    6.50    3.80
  -8 -14   6    1.20    4.40
   9  13  -6   39.80    4.70
   9  13  -6   41.00    5.40
  -9 -13   6   50.09    5.50
  10  12  -6   36.90    4.60
  10  12  -6   31.40    4.80
 -10 -12   6   37.20    5.00
  11  11  -6   54.59    5.00
  11  11  -6   60.49    5.30
 -11 -11   6   68.59    6.10
  12  10  -6   10.70    3.80
  12  10  -6   12.30    3.40
 -12 -10   6   21.10    4.50
 -12 -10   6   12.00    2.90
  13   9  -6    6.70    3.50
  13   9  -6    7.90    3.00
 -13  -9   6   10.80    2.60
 -13  -9   6    4.00    3.50
  14   8  -6  270.67   12.30
  14   8  -6  255.47   11.30
 -14  -8   6  263.57   12.30
 -14  -8   6  267.17   12.70
 -14  -8   6  251.47   11.10
  15   7  -6   17.50    3.70
  15   7  -6   11.40    2.70
 -15  -7   6   10.20    3.70
 -15  -7   6   10.40    3.70
 -15  -7   6   10.50    2.20
  16   6  -6   -2.70    3.40
 -16  -6   6   -3.50    3.50
 -16  -6   6    0.90    3.30
  17   5  -6   -1.50    3.30
 -17  -5   6    2.30    3.60
 -17  -5   6    1.20    3.10
  18   4  -6  248.58   12.10
 -18  -4   6  231.28   12.10
 -18  -4   6  258.07   12.10
  19   3  -6   12.70    4.20
 -19  -3   6   20.60    4.20
 -19  -3   6   18.90    4.30
  20   2  -6   26.90    4.80
 -20  -2   6   36.90    5.00
  21   1  -6    3.60    4.40
 -21  -1   6    3.00    4.30
  22   0  -6  539.35   22.50
 -22   0   6  493.75   22.30
  23  -1  -6   10.10    5.20
 -23   1   6   12.60    4.90
  24  -2  -6    6.50    4.80
 -24   2   6    6.70    4.80
  25  -3  -6   14.10    5.70
 -25   3   6   16.20    5.60
  26  -4  -6    3.20    5.60
 -26   4   6    8.00    5.50
   1  19  -5   16.70    5.80
   1  19  -5   25.20    6.90
  -1 -19   5   20.40    6.70
   2  18  -5    5.20    6.20
   2  18  -5   17.30    6.00
  -2 -18   5    8.00    5.60
   3  17  -5   -3.70    4.50
   3  17  -5   -3.40    5.40
  -3 -17   5    1.70    5.20
   4  16  -5   28.80    6.00
   4  16  -5   32.00    5.20
  -4 -16   5   32.00    5.50
   5  15  -5   27.30    5.20
   5  15  -5   24.30    5.40
  -5 -15   5   26.60    5.50
   6  14  -5   65.89    6.10
   6  14  -5   61.19    6.50
  -6 -14   5   56.99    5.80
   7  13  -5   -2.60    3.20
   7  13  -5   -0.60    4.10
  -7 -13   5   -6.00    3.90
   8  12  -5   -1.00    3.00
   8  12  -5   -2.70    3.60
  -8 -12   5    3.30    4.00
   9  11  -5   37.10    4.50
   9  11  -5   41.80    4.70
  -9 -11   5   36.90    4.90
  10  10  -5  169.28    9.10
  10  10  -5  172.28    8.90
 -10 -10   5  164.48    8.50
 -10 -10   5  166.28    9.60
  11   9  -5   60.69    4.70
  11   9  -5   59.29    4.80
 -11  -9   5   46.30    4.30
 -11  -9   5   53.59    5.00
 -11  -9   5   50.29    4.00
  12   8  -5    0.10    2.90
  12   8  -5    1.40    2.40
 -12  -8   5    3.80    2.10
 -12  -8   5    6.10    2.80
 -12  -8   5    0.90    3.10
  13   7  -5   33.10    3.80
  13   7  -5   40.50    3.50
 -13  -7   5   37.20    3.00
 -13  -7   5   46.30    4.10
 -13  -7   5   40.60    4.40
  14   6  -5  420.86   17.50
  14   6  -5  410.46   16.40
 -14  -6   5  400.86   16.30
 -14  -6   5  439.56   17.50
 -14  -6   5  432.06   17.60
  15   5  -5  118.79    7.50
 -15  -5   5  106.89    7.40
 -15  -5   5   97.09    7.00
  16   4  -5    0.80    3.40
 -16  -4   5    3.00    3.40
 -16  -4   5    0.60    2.90
  17   3  -5  174.98   10.00
 -17  -3   5  178.58    9.60
 -17  -3   5  173.98    9.30
  18   2  -5   25.70    4.50
 -18  -2   5   24.60    4.20
 -18  -2   5   18.80    4.10
  19   1  -5   98.69    8.50
 -19  -1   5   93.69    8.20
 -19  -1   5   89.09    7.70
  20   0  -5   -5.00    4.40
 -20   0   5   -3.90    4.20
  21  -1  -5  285.97   14.70
 -21   1   5  300.57   14.70
  22  -2  -5   10.90    4.90
 -22   2   5   13.80    4.70
  23  -3  -5   33.10    5.60
 -23   3   5   31.70    7.70
 -23   3   5   27.80    5.30
  24  -4  -5    5.30    5.30
 -24   4   5    3.60    4.80
 -24   4   5   -0.40    7.10
  25  -5  -5   19.60    6.00
 -25   5   5   18.10    5.50
 -25   5   5    9.70    8.00
 -26   6   5   20.10    6.10
 -26   6   5   18.80    8.30
  -1  19  -4   -1.00    6.50
  -1  19  -4    0.40    5.30
   1 -19   4    3.90    5.50
   0  18  -4   -5.10    5.00
   0  18  -4    5.70    6.40
   0 -18   4   -4.60    5.10
   1  17  -4   28.80    6.60
   1  17  -4   18.40    5.20
  -1 -17   4   15.60    5.50
   2  16  -4   37.40    5.50
   2  16  -4   48.10    6.80
  -2 -16   4   47.30    5.90
   3  15  -4    2.10    3.90
   3  15  -4   -0.40    4.80
  -3 -15   4   -1.00    4.60
   4  14  -4   27.10    4.40
   4  14  -4    9.60    4.80
  -4 -14   4   21.30    4.70
   5  13  -4   16.00    3.70
   5  13  -4   12.30    4.20
  -5 -13   4   13.40    4.20
   6  12  -4  255.67   12.20
   6  12  -4  247.58   11.90
  -6 -12   4  248.68   12.30
   7  11  -4   59.19    4.80
   7  11  -4   70.19    6.30
  -7 -11   4   57.09    4.90
   8  10  -4   -1.60    2.60
   8  10  -4    1.30    2.90
  -8 -10   4    0.80    3.00
  -8 -10   4    1.80    2.40
  -8 -10   4    2.50    2.60
   9   9  -4   45.50    4.20
   9   9  -4   48.90    4.30
   9   9  -4   55.19    4.50
  -9  -9   4   39.80    3.80
  -9  -9   4   43.00    3.70
  -9  -9   4   45.80    4.40
  10   8  -4  115.89    7.00
  10   8  -4  116.99    6.70
  10   8  -4  116.39    6.70
 -10  -8   4  115.29    6.20
 -10  -8   4  114.99    7.20
 -10  -8   4  116.39    6.80
  11   7  -4  457.35   18.30
  11   7  -4  453.35   18.80
  11   7  -4  486.15   19.00
 -11  -7   4  458.55   18.90
 -11  -7   4  463.85   18.80
 -11  -7   4  476.85   18.20
  12   6  -4    1.30    2.00
  12   6  -4   -3.80    2.50
  12   6  -4    0.30    3.00
 -12  -6   4    1.00    2.70
 -12  -6   4   -1.40    2.80
 -12  -6   4    4.90    1.80
  13   5  -4   18.50    3.90
  13   5  -4   16.30    3.10
  13   5  -4   16.00    3.40
 -13  -5   4   19.00    3.30
 -13  -5   4   17.40    3.50
  14   4  -4   -0.60    2.40
  14   4  -4   -5.30    2.70
  14   4  -4   -1.50    3.20
 -14  -4   4   -4.40    2.70
 -14  -4   4   -5.00    2.50
  15   3  -4  168.88    9.30
 -15  -3   4  179.18    8.80
 -15  -3   4  153.78    8.90
  16   2  -4    9.90    3.80
 -16  -2   4    7.60    3.30
 -16  -2   4    5.80    3.40
  17   1  -4    1.10    3.70
 -17  -1   4    2.60    3.40
 -17  -1   4   11.40    3.70
  18   0  -4  101.79    8.30
 -18   0   4   94.99    7.90
 -18   0   4  108.49    7.70
  19  -1  -4   99.89    8.90
 -19   1   4  102.89    8.40
  20  -2  -4    2.20    4.80
 -20   2   4   16.00    5.90
 -20   2   4    1.10    3.90
  21  -3  -4   25.30    5.70
 -21   3   4   26.50    5.20
 -21   3   4   38.50    7.00
  22  -4  -4  133.59   11.10
 -22   4   4  133.19   10.20
 -22   4   4  124.19   12.40
  23  -5  -4    6.50    5.60
 -23   5   4    0.60    4.60
 -23   5   4    1.80    6.40
  24  -6  -4    5.80    6.00
 -24   6   4    1.60    4.90
 -24   6   4   -2.90    6.70
  25  -7  -4    0.00    6.30
 -25   7   4    5.10    7.50
  -3  19  -3    0.00    5.50
  -3  19  -3   -0.50    6.50
   3 -19   3   -3.90    5.30
  -2  18  -3   40.90    7.10
  -2  18  -3   35.60    6.30
   2 -18   3   36.70    6.10
  -1  17  -3    7.40    4.60
  -1  17  -3   13.40    5.80
   1 -17   3   17.50    5.50
   0  16  -3    1.20    5.40
   0  16  -3    4.10    4.20
   0 -16   3   -4.30    4.80
   1  15  -3    5.20    3.90
   1  15  -3    4.60    4.70
  -1 -15   3    2.20    4.50
   2  14  -3   48.00    5.00
   2  14  -3   57.49    6.20
  -2 -14   3   42.70    5.20
   3  13  -3   72.29    6.20
   3  13  -3   73.49    5.80
  -3 -13   3   68.59    5.80
   4  12  -3    8.00    3.00
   4  12  -3    6.30    3.60
  -4 -12   3    2.20    3.80
   5  11  -3  147.59    8.10
   5  11  -3  154.08    7.90
   5  11  -3  142.99    8.50
  -5 -11   3  150.58    8.50
   6  10  -3   -3.50    3.00
   6  10  -3   -0.10    2.40
   6  10  -3    0.00    2.70
  -6 -10   3    1.40    2.50
  -6 -10   3   -3.40    2.60
  -6 -10   3   -0.20    2.30
   7   9  -3  213.68    9.70
   7   9  -3  201.08    9.60
   7   9  -3  205.48    9.50
  -7  -9   3  201.18    9.40
  -7  -9   3  192.88    9.90
  -7  -9   3  211.78    9.40
   8   8  -3    2.20    2.50
   8   8  -3    3.70    2.40
   8   8  -3    4.40    2.40
  -8  -8   3    3.50    2.10
  -8  -8   3    2.80    2.20
  -8  -8   3    6.20    2.60
   9   7  -3  454.35   18.50
   9   7  -3  473.15   18.30
   9   7  -3  466.45   18.60
  -9  -7   3  462.55   18.50
  -9  -7   3  462.45   18.70
  -9  -7   3  466.05   18.10
  10   6  -3   35.70    3.40
  10   6  -3   28.80    3.00
  10   6  -3   23.40    2.70
 -10  -6   3   20.40    2.90
 -10  -6   3   25.00    2.40
 -10  -6   3   25.40    3.10
  11   5  -3  587.54   22.10
  11   5  -3  584.04   22.90
  11   5  -3  579.64   22.90
 -11  -5   3  586.04   22.00
 -11  -5   3  579.74   22.90
 -11  -5   3  573.14   23.00
  12   4  -3  139.59    8.20
  12   4  -3  123.99    7.00
  12   4  -3  124.49    7.50
 -12  -4   3  131.49    7.10
 -12  -4   3  124.69    7.20
  13   3  -3   95.79    7.00
  13   3  -3  113.49    7.50
 -13  -3   3  104.59    6.30
 -13  -3   3   87.19    6.50
  14   2  -3   72.19    5.10
  14   2  -3   73.49    6.80
 -14  -2   3   60.59    4.90
 -14  -2   3   69.29    5.80
  15   1  -3   40.50    5.10
  15   1  -3   43.40    4.40
 -15  -1   3   53.79    4.70
 -15  -1   3   56.79    4.70
  16   0  -3   -4.80    3.60
 -16   0   3   -1.00    2.60
 -16   0   3    1.40    3.00
  17  -1  -3   -0.20    4.00
 -17   1   3    4.80    3.10
 -17   1   3    5.80    3.50
  18  -2  -3  468.95   20.50
 -18   2   3  505.55   22.90
 -18   2   3  438.06   20.00
  19  -3  -3   -5.40    4.60
 -19   3   3    0.80    4.20
 -19   3   3    1.80    5.20
  20  -4  -3   -1.40    4.90
 -20   4   3   -0.30    5.40
  21  -5  -3    1.50    4.90
 -21   5   3    6.60    5.90
  22  -6  -3   63.19    7.20
 -22   6   3   58.89    8.20
  23  -7  -3   18.30    6.20
 -23   7   3    2.10    6.80
  24  -8  -3   -5.60    5.70
 -24   8   3    3.00    7.20
  -5  19  -2   -5.10    5.40
  -5  19  -2   -0.20    6.10
   5 -19   2   -2.50    5.50
  -4  18  -2   -0.60    6.10
  -4  18  -2   -7.70    5.00
   4 -18   2   -6.60    4.90
  -3  17  -2   17.10    6.10
  -3  17  -2   12.60    5.20
   3 -17   2    3.40    5.00
  -2  16  -2   -3.00    4.10
  -2  16  -2    0.40    5.20
   2 -16   2   -5.10    4.40
  -1  15  -2   22.20    4.40
  -1  15  -2   18.60    5.20
   1 -15   2   38.30    5.40
   0  14  -2   18.00    4.90
   0  14  -2   19.20    4.00
   0 -14   2   20.00    4.50
   1  13  -2   36.80    5.10
   1  13  -2   39.40    4.70
  -1 -13   2   39.20    4.90
   2  12  -2    0.00    2.90
   2  12  -2   -2.50    2.60
   2  12  -2   -2.90    3.30
  -2 -12   2   -2.90    3.20
   3  11  -2   38.90    3.70
   3  11  -2   43.50    4.00
   3  11  -2   45.80    4.80
  -3 -11   2   41.50    4.20
   4  10  -2    0.10    2.60
   4  10  -2    0.10    2.20
   4  10  -2    1.20    2.90
  -4 -10   2    0.10    2.20
  -4 -10   2    0.00    2.80
  -4 -10   2    3.90    2.20
   5   9  -2  171.48    8.70
   5   9  -2  173.08    8.50
   5   9  -2  172.18    8.50
  -5  -9   2  193.18    8.60
  -5  -9   2  185.68    8.70
  -5  -9   2  177.68    8.50
   6   8  -2  225.78   10.00
   6   8  -2  222.98    9.80
   6   8  -2  218.38    9.80
  -6  -8   2  215.38   10.00
  -6  -8   2  217.88    9.70
  -6  -8   2  218.88    9.60
   7   7  -2  312.17   12.80
   7   7  -2  314.67   13.00
   7   7  -2  310.97   13.00
  -7  -7   2  324.97   12.70
  -7  -7   2  294.87   12.80
  -7  -7   2  313.37   13.10
   8   6  -2  115.49    5.90
   8   6  -2  117.49    6.50
   8   6  -2  117.29    6.40
  -8  -6   2  116.29    6.20
  -8  -6   2  125.09    6.50
  -8  -6   2  116.09    5.80
   9   5  -2  254.37   10.70
   9   5  -2  251.17   10.70
   9   5  -2  227.48   10.00
  -9  -5   2  247.98   10.70
  -9  -5   2  244.08   10.60
  -9  -5   2  241.18    9.90
  10   4  -2  840.22   31.90
  10   4  -2  842.92   31.00
  10   4  -2  834.52   31.90
 -10  -4   2  803.62   31.80
 -10  -4   2  825.42   30.90
 -10  -4   2  831.12   31.80
  11   3  -2   -3.00    2.30
  11   3  -2   -1.00    2.80
  11   3  -2   -0.30    2.80
 -11  -3   2   -4.70    2.40
 -11  -3   2   -3.10    2.20
  12   2  -2   47.40    4.20
  12   2  -2   47.40    4.80
 -12  -2   2   58.99    4.30
 -12  -2   2   40.00    3.80
  13   1  -2   51.09    4.90
  13   1  -2   51.49    4.30
 -13  -1   2   58.19    4.50
 -13  -1   2   52.59    4.40
  14   0  -2  745.93   32.50
  14   0  -2  754.42   29.10
 -14   0   2  744.53   29.00
 -14   0   2  715.53   28.90
  15  -1  -2  157.28    9.50
  15  -1  -2  159.68    9.60
 -15   1   2  159.08    8.80
 -15   1   2  149.39    8.40
  16  -2  -2   15.80    4.30
  16  -2  -2   11.40    4.20
 -16   2   2   17.40    3.80
 -16   2   2   16.00    4.80
  17  -3  -2   -0.40    4.50
 -17   3   2   13.40    4.90
  18  -4  -2  148.49   10.80
 -18   4   2  149.99   11.30
  19  -5  -2   74.89    7.00
 -19   5   2   80.89    8.00
  20  -6  -2    8.20    5.20
 -20   6   2    5.80    5.90
  21  -7  -2   22.90    5.90
 -21   7   2   19.80    6.90
  22  -8  -2    3.70    5.80
 -22   8   2   18.70    7.20
  23  -9  -2   12.40    6.10
  -7  19  -1    3.10    6.30
  -7  19  -1    6.60    5.50
   7 -19   1    6.80    5.60
  -6  18  -1   -4.50    5.10
  -6  18  -1    1.80    5.90
   6 -18   1    2.50    5.40
  -5  17  -1   20.20    5.50
  -5  17  -1   10.20    5.80
   5 -17   1   30.50    6.10
  -4  16  -1   11.60    4.70
  -4  16  -1    9.50    5.50
   4 -16   1    8.90    4.70
  -3  15  -1   40.40    6.10
  -3  15  -1   52.89    5.80
   3 -15   1   43.00    5.60
  -2  14  -1   10.90    4.70
  -2  14  -1    7.60    3.60
   2 -14   1    8.50    4.30
  -1  13  -1    7.30    3.30
  -1  13  -1   -2.90    3.90
  -1  13  -1    9.60    3.20
   1 -13   1   10.40    4.10
   0  12  -1   13.00    3.80
   0  12  -1    9.00    3.10
   0  12  -1    9.10    3.10
   0 -12   1   10.30    3.70
   1  11  -1  140.79    7.50
[truncated: 671,881 more chars]
