# Supplementary material for: Structural Diversity and Carbon Dioxide Sorption Selectivity of Zinc(II) Metal-Organic Frameworks Based on Bis(1,2,4-triazol-1-yl)methane and Terephthalic Acid
Source: Molecules. 2022 Oct 1;27(19):6481. doi: 10.3390/molecules27196481 (PMC9571910; doi:10.3390/molecules27196481)
Supplement: Supplementary file 1 [file molecules-27-06481-s001.zip › 3a.cif]

data_tgs142_a_1
_audit_creation_date               2022-09-16
_audit_creation_method
;
Olex2 1.2
(compiled 2018.05.29 svn.r3508 for OlexSys, GUI svn.r5506)
;
_shelx_SHELXL_version_number       '2017/1'
_audit_contact_author_address      ?
_audit_contact_author_email        ?
_audit_contact_author_name         ''
_audit_contact_author_phone        ?
_publ_contact_author_id_orcid      ?
_publ_section_references
;
Dolomanov, O.V., Bourhis, L.J., Gildea, R.J, Howard, J.A.K. & Puschmann, H.
 (2009), J. Appl. Cryst. 42, 339-341.

Sheldrick, G.M. (2015). Acta Cryst. A71, 3-8.

Sheldrick, G.M. (2015). Acta Cryst. C71, 3-8.
;
_chemical_name_common              ?
_chemical_name_systematic          ?
_chemical_formula_moiety           '0.25(C52 H40 N24 O16 Zn4), 3(C3 H7 N O)'
_chemical_formula_sum              'C22 H31 N9 O7 Zn'
_chemical_formula_weight           598.93
_chemical_melting_point            ?
loop_
  _atom_type_symbol
  _atom_type_description
  _atom_type_scat_dispersion_real
  _atom_type_scat_dispersion_imag
  _atom_type_scat_source
 'C' 'C' 0.0033 0.0016 'International Tables Vol C Tables 4.2.6.8 and 6.1.1.4'
 'H' 'H' 0.0000 0.0000 'International Tables Vol C Tables 4.2.6.8 and 6.1.1.4'
 'N' 'N' 0.0061 0.0033 'International Tables Vol C Tables 4.2.6.8 and 6.1.1.4'
 'O' 'O' 0.0106 0.0060 'International Tables Vol C Tables 4.2.6.8 and 6.1.1.4'
 'Zn' 'Zn' 0.2839 1.4301 'International Tables Vol C Tables 4.2.6.8 and 6.1.1.4'

_shelx_space_group_comment
;
The symmetry employed for this shelxl refinement is uniquely defined
by the following loop, which should always be used as a source of
symmetry information in preference to the above space-group names.
They are only intended as comments.
;
_space_group_crystal_system        'monoclinic'
_space_group_IT_number             14
_space_group_name_H-M_alt          'P 1 21/c 1'
_space_group_name_Hall             '-P 2ybc'
loop_
  _space_group_symop_operation_xyz
 'x, y, z'
 '-x, y+1/2, -z+1/2'
 '-x, -y, -z'
 'x, -y-1/2, z-1/2'

_cell_length_a                     19.9831(15)
_cell_length_b                     16.6095(13)
_cell_length_c                     17.4898(13)
_cell_angle_alpha                  90
_cell_angle_beta                   102.142(2)
_cell_angle_gamma                  90
_cell_volume                       5675.2(7)
_cell_formula_units_Z              8
_cell_measurement_reflns_used      9916
_cell_measurement_temperature      150(2)
_cell_measurement_theta_max        25.43
_cell_measurement_theta_min        2.38
_shelx_estimated_absorpt_T_max     0.930
_shelx_estimated_absorpt_T_min     0.796
_exptl_absorpt_coefficient_mu      0.921
_exptl_absorpt_correction_T_max    0.7453
_exptl_absorpt_correction_T_min    0.6508
_exptl_absorpt_correction_type     multi-scan
_exptl_absorpt_process_details    
 'SADABS-2012/1 (Bruker,2012) was used for absorption correction. wR2(int) was 0.0700 before and 0.0526 after correction. The Ratio of minimum to maximum transmission is 0.8732. The \l/2 correction factor is 0.0015.'
_exptl_absorpt_special_details     ?
_exptl_crystal_colour              colourless
_exptl_crystal_colour_primary      colourless
_exptl_crystal_density_diffrn      1.402
_exptl_crystal_density_meas        .
_exptl_crystal_density_method      ?
_exptl_crystal_description         prism
_exptl_crystal_F_000               2496
_exptl_crystal_size_max            0.26
_exptl_crystal_size_mid            0.15
_exptl_crystal_size_min            0.08
_exptl_transmission_factor_max     ?
_exptl_transmission_factor_min     ?
_diffrn_reflns_av_R_equivalents    0.0671
_diffrn_reflns_av_unetI/netI       0.0558
_diffrn_reflns_Laue_measured_fraction_full  0.998
_diffrn_reflns_Laue_measured_fraction_max  0.998
_diffrn_reflns_limit_h_max         23
_diffrn_reflns_limit_h_min         -23
_diffrn_reflns_limit_k_max         19
_diffrn_reflns_limit_k_min         -19
_diffrn_reflns_limit_l_max         20
_diffrn_reflns_limit_l_min         -20
_diffrn_reflns_number              57338
_diffrn_reflns_point_group_measured_fraction_full  0.998
_diffrn_reflns_point_group_measured_fraction_max  0.998
_diffrn_reflns_theta_full          24.406
_diffrn_reflns_theta_max           24.406
_diffrn_reflns_theta_min           1.042
_diffrn_ambient_temperature        150(2)
_diffrn_detector                   CCD
_diffrn_detector_area_resol_mean   8.33
_diffrn_detector_type              'Bruker APEXII CCD area detector'
_diffrn_measured_fraction_theta_full  0.998
_diffrn_measured_fraction_theta_max  0.998
_diffrn_measurement_device         '\k-geometry diffractometer'
_diffrn_measurement_device_type    'Bruker APEX diffractometer'
_diffrn_measurement_method         '\w and \f scans'
_diffrn_radiation_monochromator    'graphite'
_diffrn_radiation_type             MoK\a
_diffrn_radiation_wavelength       0.71073
_diffrn_source                     'sealed tube'
_diffrn_standards_interval_count   .
_diffrn_standards_interval_time    .
_diffrn_standards_number           .
_reflns_Friedel_coverage           0.000
_reflns_Friedel_fraction_full      .
_reflns_Friedel_fraction_max       .
_reflns_number_gt                  5414
_reflns_number_total               9328
_reflns_special_details
;
 Reflections were merged by SHELXL according to the crystal
 class for the calculation of statistics and refinement.
 
 _reflns_Friedel_fraction is defined as the number of unique
 Friedel pairs measured divided by the number that would be
 possible theoretically, ignoring centric projections and
 systematic absences.
;
_reflns_threshold_expression       'I > 2\s(I)'
_computing_cell_refinement         'Bruker SAINT'
_computing_data_collection         'Bruker APEX2'
_computing_data_reduction          'Bruker SAINT'
_computing_molecular_graphics      'Olex2 (Dolomanov et al., 2009)'
_computing_publication_material    'Olex2 (Dolomanov et al., 2009)'
_computing_structure_refinement    'ShelXL (Sheldrick, 2015)'
_computing_structure_solution      'ShelXT (Sheldrick, 2015)'
_refine_diff_density_max           0.697
_refine_diff_density_min           -0.526
_refine_diff_density_rms           0.086
_refine_ls_extinction_coef         .
_refine_ls_extinction_method       none
_refine_ls_goodness_of_fit_ref     1.060
_refine_ls_hydrogen_treatment      constr
_refine_ls_matrix_type             full
_refine_ls_number_parameters       715
_refine_ls_number_reflns           9328
_refine_ls_number_restraints       0
_refine_ls_R_factor_all            0.1102
_refine_ls_R_factor_gt             0.0506
_refine_ls_restrained_S_all        1.060
_refine_ls_shift/su_max            0.001
_refine_ls_shift/su_mean           0.000
_refine_ls_structure_factor_coef   Fsqd
_refine_ls_weighting_details      
 'w=1/[\s^2^(Fo^2^)+(0.0727P)^2^+11.5290P] where P=(Fo^2^+2Fc^2^)/3'
_refine_ls_weighting_scheme        calc
_refine_ls_wR_factor_gt            0.1316
_refine_ls_wR_factor_ref           0.1681
_refine_special_details            ?
_olex2_refinement_description
;
1. Fixed Uiso
 At 1.2 times of:
  All C(H) groups, All C(H,H) groups
 At 1.5 times of:
  All C(H,H,H) groups
2.a Secondary CH2 refined with riding coordinates:
 C7(H7A,H7B), C12(H12A,H12B)
2.b Aromatic/amide H refined with riding coordinates:
 C4(H4), C6(H6), C8(H8), C9(H9), C10(H10), C11(H11), C13(H13), C15(H15),
 C16(H16), C18(H18), C19(H19), C20(H20), C21(H21), C22(H22), C23(H23), C24(H24),
  C31(H31), C28(H28), C30(H30), C29(H29), C27(H27), C32(H32)
2.c Idealised Me refined as rotating group:
 C37(H37A,H37B,H37C), C43(H43A,H43B,H43C), C38(H38A,H38B,H38C), C42(H42A,H42B,
 H42C), C41(H41A,H41B,H41C), C44(H44A,H44B,H44C), C35(H35A,H35B,H35C), C39(H39A,
 H39B,H39C), C33(H33A,H33B,H33C), C36(H36A,H36B,H36C), C34(H34A,H34B,H34C),
 C40(H40A,H40B,H40C)
;
_atom_sites_solution_hydrogens     geom
_atom_sites_solution_primary       dual
_atom_sites_solution_secondary     ?
loop_
  _atom_site_label
  _atom_site_type_symbol
  _atom_site_fract_x
  _atom_site_fract_y
  _atom_site_fract_z
  _atom_site_U_iso_or_equiv
  _atom_site_adp_type
  _atom_site_occupancy
  _atom_site_site_symmetry_order
  _atom_site_calc_flag
  _atom_site_refinement_flags_posn
  _atom_site_refinement_flags_adp
  _atom_site_refinement_flags_occupancy
  _atom_site_disorder_assembly
  _atom_site_disorder_group
 Zn1 Zn 0.52867(3) 0.63417(3) 0.62380(3) 0.02346(18) Uani 1 1 d . . . . .
 Zn2 Zn 1.02966(3) 0.37780(3) 0.62730(3) 0.02334(18) Uani 1 1 d . . . . .
 O1 O 0.39457(16) 0.6847(2) 0.5947(2) 0.0309(9) Uani 1 1 d . . . . .
 O2 O 0.95002(15) 0.4398(2) 0.6463(2) 0.0284(8) Uani 1 1 d . . . . .
 O3 O 0.89546(16) 0.3283(2) 0.5986(2) 0.0310(9) Uani 1 1 d . . . . .
 O4 O 0.44919(15) 0.5749(2) 0.6461(2) 0.0281(8) Uani 1 1 d . . . . .
 O5 O 0.08075(17) 0.4992(2) 0.5899(2) 0.0379(10) Uani 1 1 d . . . . .
 O6 O 0.57962(17) 0.5063(2) 0.5939(2) 0.0373(10) Uani 1 1 d . . . . .
 O7 O 0.13042(17) 0.4072(2) 0.6722(2) 0.0388(10) Uani 1 1 d . . . . .
 O8 O 0.62873(18) 0.6074(2) 0.6645(2) 0.0389(10) Uani 1 1 d . . . . .
 N1 N 0.52157(19) 0.6618(3) 0.2602(2) 0.0239(10) Uani 1 1 d . . . . .
 N2 N 1.01891(19) 0.3256(2) 0.2642(2) 0.0250(10) Uani 1 1 d . . . . .
 N3 N 0.53918(19) 0.7625(2) 0.1884(2) 0.0242(10) Uani 1 1 d . . . . .
 N4 N 1.03859(19) 0.2239(2) 0.1945(2) 0.0253(10) Uani 1 1 d . . . . .
 N5 N 0.9946(2) 0.3524(3) 0.3885(2) 0.0263(10) Uani 1 1 d . . . . .
 N6 N 1.01671(19) 0.3429(3) 0.5142(2) 0.0251(10) Uani 1 1 d . . . . .
 N7 N 0.51493(19) 0.6610(2) 0.5089(2) 0.0250(10) Uani 1 1 d . . . . .
 N8 N 0.4950(2) 0.6428(3) 0.3835(2) 0.0257(10) Uani 1 1 d . . . . .
 N9 N 0.4679(2) 0.7167(3) 0.3938(3) 0.0322(11) Uani 1 1 d . . . . .
 N10 N 1.0884(2) 0.3152(3) 0.2828(3) 0.0318(11) Uani 1 1 d . . . . .
 N11 N 0.9680(2) 0.2791(3) 0.4038(3) 0.0345(11) Uani 1 1 d . . . . .
 N12 N 0.5914(2) 0.6716(3) 0.2763(3) 0.0332(11) Uani 1 1 d . . . . .
 C1 C 0.3941(2) 0.6171(3) 0.6218(3) 0.0243(12) Uani 1 1 d . . . . .
 C2 C 0.8279(2) 0.4353(3) 0.6301(3) 0.0241(12) Uani 1 1 d . . . . .
 C3 C 0.3274(2) 0.5780(3) 0.6290(3) 0.0247(12) Uani 1 1 d . . . . .
 C4 C 0.4917(2) 0.7159(3) 0.2085(3) 0.0263(12) Uani 1 1 d . . . . .
 H4 H 0.443823 0.720683 0.188835 0.032 Uiso 1 1 calc R . . . .
 C5 C 0.8954(2) 0.3971(3) 0.6239(3) 0.0245(12) Uani 1 1 d . . . . .
 C6 C 0.9903(2) 0.2703(3) 0.2127(3) 0.0248(12) Uani 1 1 d . . . . .
 H6 H 0.942586 0.264931 0.192122 0.030 Uiso 1 1 calc R . . . .
 C7 C 0.9859(3) 0.3806(3) 0.3090(3) 0.0281(12) Uani 1 1 d . . . . .
 H7A H 1.006175 0.434939 0.308570 0.034 Uiso 1 1 calc R . . . .
 H7B H 0.936499 0.384394 0.284986 0.034 Uiso 1 1 calc R . . . .
 C8 C 0.5225(2) 0.6107(3) 0.4524(3) 0.0246(12) Uani 1 1 d . . . . .
 H8 H 0.544209 0.559550 0.460114 0.030 Uiso 1 1 calc R . . . .
 C9 C 1.0980(2) 0.2547(3) 0.2396(3) 0.0297(13) Uani 1 1 d . . . . .
 H9 H 1.142023 0.233552 0.239020 0.036 Uiso 1 1 calc R . . . .
 C10 C 0.5992(3) 0.7326(3) 0.2326(3) 0.0298(13) Uani 1 1 d . . . . .
 H10 H 0.642731 0.754851 0.231258 0.036 Uiso 1 1 calc R . . . .
 C11 C 1.0233(2) 0.3884(3) 0.4543(3) 0.0239(12) Uani 1 1 d . . . . .
 H11 H 1.045450 0.439261 0.458101 0.029 Uiso 1 1 calc R . . . .
 C12 C 0.4892(3) 0.6084(3) 0.3064(3) 0.0268(12) Uani 1 1 d . . . . .
 H12A H 0.511760 0.555020 0.310529 0.032 Uiso 1 1 calc R . . . .
 H12B H 0.440401 0.601172 0.281212 0.032 Uiso 1 1 calc R . . . .
 C13 C 0.2665(2) 0.6193(3) 0.5991(3) 0.0300(13) Uani 1 1 d . . . . .
 H13 H 0.268054 0.671203 0.576846 0.036 Uiso 1 1 calc R . . . .
 C14 C 0.2011(2) 0.5096(3) 0.6346(3) 0.0257(12) Uani 1 1 d . . . . .
 C15 C 0.7610(2) 0.5466(3) 0.6611(3) 0.0333(13) Uani 1 1 d . . . . .
 H15 H 0.758792 0.599105 0.681942 0.040 Uiso 1 1 calc R . . . .
 C16 C 0.2621(2) 0.4686(3) 0.6658(3) 0.0321(13) Uani 1 1 d . . . . .
 H16 H 0.260825 0.417325 0.689414 0.039 Uiso 1 1 calc R . . . .
 C17 C 0.7012(2) 0.5036(3) 0.6337(3) 0.0267(12) Uani 1 1 d . . . . .
 C18 C 0.3249(2) 0.5037(3) 0.6618(3) 0.0300(13) Uani 1 1 d . . . . .
 H18 H 0.366204 0.475553 0.682117 0.036 Uiso 1 1 calc R . . . .
 C19 C 0.9828(3) 0.2765(3) 0.4806(3) 0.0321(13) Uani 1 1 d . . . . .
 H19 H 0.970991 0.232563 0.509912 0.039 Uiso 1 1 calc R . . . .
 C20 C 0.7680(3) 0.3919(3) 0.6054(3) 0.0356(14) Uani 1 1 d . . . . .
 H20 H 0.770164 0.338097 0.587628 0.043 Uiso 1 1 calc R . . . .
 C21 C 0.2041(2) 0.5846(3) 0.6020(3) 0.0329(13) Uani 1 1 d . . . . .
 H21 H 0.162978 0.612906 0.581264 0.039 Uiso 1 1 calc R . . . .
 C22 C 0.8240(2) 0.5130(3) 0.6582(3) 0.0322(13) Uani 1 1 d . . . . .
 H22 H 0.864636 0.543303 0.675442 0.039 Uiso 1 1 calc R . . . .
 C23 C 0.4816(3) 0.7247(3) 0.4702(3) 0.0346(14) Uani 1 1 d . . . . .
 H23 H 0.469267 0.771018 0.495955 0.041 Uiso 1 1 calc R . . . .
 C24 C 0.7052(2) 0.4264(3) 0.6065(3) 0.0362(14) Uani 1 1 d . . . . .
 H24 H 0.664399 0.396556 0.588295 0.043 Uiso 1 1 calc R . . . .
 C25 C 0.6325(2) 0.5410(3) 0.6311(3) 0.0303(13) Uani 1 1 d . . . . .
 C26 C 0.1335(3) 0.4701(3) 0.6324(3) 0.0305(13) Uani 1 1 d . . . . .
 O9 O 0.7479(2) 0.7855(3) 0.6911(3) 0.0626(13) Uani 1 1 d . . . . .
 N18 N 0.7028(3) 0.8726(4) 0.5942(4) 0.0612(16) Uani 1 1 d . . . . .
 C31 C 0.7462(3) 0.8506(5) 0.6591(4) 0.0583(19) Uani 1 1 d . . . . .
 H31 H 0.778987 0.889362 0.682820 0.070 Uiso 1 1 calc R . . . .
 C37 C 0.6521(4) 0.8167(6) 0.5524(4) 0.081(3) Uani 1 1 d . . . . .
 H37A H 0.658162 0.764044 0.578164 0.122 Uiso 1 1 calc GR . . . .
 H37B H 0.657937 0.811234 0.498335 0.122 Uiso 1 1 calc GR . . . .
 H37C H 0.606114 0.837115 0.552346 0.122 Uiso 1 1 calc GR . . . .
 C43 C 0.7066(5) 0.9519(6) 0.5590(6) 0.116(4) Uani 1 1 d . . . . .
 H43A H 0.663163 0.980379 0.556216 0.174 Uiso 1 1 calc GR . . . .
 H43B H 0.715143 0.945470 0.506240 0.174 Uiso 1 1 calc GR . . . .
 H43C H 0.743868 0.982930 0.591101 0.174 Uiso 1 1 calc GR . . . .
 O10 O 0.6530(2) 0.3756(3) 0.8123(3) 0.0648(14) Uani 1 1 d . . . . .
 N15 N 0.7694(3) 0.3724(3) 0.8395(3) 0.0532(15) Uani 1 1 d . . . . .
 C28 C 0.7068(4) 0.3418(5) 0.8140(4) 0.064(2) Uani 1 1 d . . . . .
 H28 H 0.704320 0.287955 0.795371 0.077 Uiso 1 1 calc R . . . .
 C38 C 0.7762(4) 0.4538(5) 0.8686(6) 0.090(3) Uani 1 1 d . . . . .
 H38A H 0.796458 0.487430 0.833416 0.136 Uiso 1 1 calc GR . . . .
 H38B H 0.805844 0.454341 0.920965 0.136 Uiso 1 1 calc GR . . . .
 H38C H 0.730980 0.474859 0.871351 0.136 Uiso 1 1 calc GR . . . .
 C42 C 0.8311(4) 0.3294(5) 0.8386(5) 0.092(3) Uani 1 1 d . . . . .
 H42A H 0.856275 0.320687 0.892364 0.138 Uiso 1 1 calc GR . . . .
 H42B H 0.859468 0.360786 0.810008 0.138 Uiso 1 1 calc GR . . . .
 H42C H 0.819982 0.277346 0.812685 0.138 Uiso 1 1 calc GR . . . .
 O11 O 1.0775(2) 0.6115(3) 0.9617(3) 0.0672(14) Uani 1 1 d . . . . .
 N16 N 1.0199(3) 0.5108(3) 0.8871(3) 0.0556(15) Uani 1 1 d . . . . .
 C30 C 1.0741(4) 0.5484(4) 0.9250(4) 0.0613(19) Uani 1 1 d . . . . .
 H30 H 1.116684 0.523360 0.924061 0.074 Uiso 1 1 calc R . . . .
 C41 C 0.9525(4) 0.5438(6) 0.8907(5) 0.094(3) Uani 1 1 d . . . . .
 H41A H 0.928478 0.506089 0.918635 0.141 Uiso 1 1 calc GR . . . .
 H41B H 0.925720 0.551897 0.837533 0.141 Uiso 1 1 calc GR . . . .
 H41C H 0.958368 0.595455 0.918395 0.141 Uiso 1 1 calc GR . . . .
 C44 C 1.0211(6) 0.4334(5) 0.8521(5) 0.114(4) Uani 1 1 d . . . . .
 H44A H 1.068198 0.419893 0.849045 0.171 Uiso 1 1 calc GR . . . .
 H44B H 0.992222 0.434117 0.799356 0.171 Uiso 1 1 calc GR . . . .
 H44C H 1.003713 0.393058 0.883893 0.171 Uiso 1 1 calc GR . . . .
 O12 O 0.8394(2) 0.1578(3) 0.6991(3) 0.0760(17) Uani 1 1 d . . . . .
 N14 N 0.7384(2) 0.1692(3) 0.6131(3) 0.0462(13) Uani 1 1 d . . . . .
 C29 C 0.8063(3) 0.1691(4) 0.6352(5) 0.0576(19) Uani 1 1 d . . . . .
 H29 H 0.831105 0.179262 0.595477 0.069 Uiso 1 1 calc R . . . .
 C35 C 0.7025(4) 0.1843(5) 0.5336(4) 0.079(3) Uani 1 1 d . . . . .
 H35A H 0.677630 0.235357 0.531270 0.118 Uiso 1 1 calc GR . . . .
 H35B H 0.670041 0.140457 0.516093 0.118 Uiso 1 1 calc GR . . . .
 H35C H 0.735555 0.187173 0.499451 0.118 Uiso 1 1 calc GR . . . .
 C39 C 0.6979(4) 0.1563(6) 0.6718(5) 0.080(3) Uani 1 1 d . . . . .
 H39A H 0.728133 0.154961 0.723790 0.121 Uiso 1 1 calc GR . . . .
 H39B H 0.673470 0.104931 0.661797 0.121 Uiso 1 1 calc GR . . . .
 H39C H 0.664778 0.200174 0.669566 0.121 Uiso 1 1 calc GR . . . .
 O13 O 0.4854(3) 0.5974(3) 0.0554(3) 0.0808(17) Uani 1 1 d . . . . .
 N13 N 0.4719(2) 0.4883(3) 0.1280(3) 0.0416(12) Uani 1 1 d . . . . .
 C27 C 0.4502(4) 0.5523(4) 0.0866(4) 0.0510(17) Uani 1 1 d . . . . .
 H27 H 0.403030 0.565063 0.079933 0.061 Uiso 1 1 calc R . . . .
 C33 C 0.4264(4) 0.4356(5) 0.1581(4) 0.074(2) Uani 1 1 d . . . . .
 H33A H 0.379617 0.456823 0.144194 0.111 Uiso 1 1 calc GR . . . .
 H33B H 0.440779 0.432427 0.215180 0.111 Uiso 1 1 calc GR . . . .
 H33C H 0.427748 0.381816 0.135560 0.111 Uiso 1 1 calc GR . . . .
 C36 C 0.5428(4) 0.4639(5) 0.1395(5) 0.077(2) Uani 1 1 d . . . . .
 H36A H 0.546378 0.416560 0.107135 0.115 Uiso 1 1 calc GR . . . .
 H36B H 0.560090 0.450531 0.194674 0.115 Uiso 1 1 calc GR . . . .
 H36C H 0.569901 0.508034 0.124436 0.115 Uiso 1 1 calc GR . . . .
 O14 O 0.8405(3) 0.8818(4) 0.4924(4) 0.100(2) Uani 1 1 d . . . . .
 N17 N 0.8000(3) 0.7539(4) 0.4739(3) 0.0601(16) Uani 1 1 d . . . . .
 C32 C 0.8343(4) 0.8135(5) 0.5148(5) 0.071(2) Uani 1 1 d . . . . .
 H32 H 0.856495 0.801506 0.567100 0.085 Uiso 1 1 calc R . . . .
 C34 C 0.7944(4) 0.6759(4) 0.5071(4) 0.069(2) Uani 1 1 d . . . . .
 H34A H 0.815691 0.635650 0.478904 0.104 Uiso 1 1 calc GR . . . .
 H34B H 0.745973 0.662548 0.502835 0.104 Uiso 1 1 calc GR . . . .
 H34C H 0.817687 0.676235 0.562341 0.104 Uiso 1 1 calc GR . . . .
 C40 C 0.7650(4) 0.7666(6) 0.3937(4) 0.090(3) Uani 1 1 d . . . . .
 H40A H 0.716262 0.754361 0.388182 0.135 Uiso 1 1 calc GR . . . .
 H40B H 0.784677 0.731191 0.359366 0.135 Uiso 1 1 calc GR . . . .
 H40C H 0.770421 0.822847 0.379230 0.135 Uiso 1 1 calc GR . . . .

loop_
  _atom_site_aniso_label
  _atom_site_aniso_U_11
  _atom_site_aniso_U_22
  _atom_site_aniso_U_33
  _atom_site_aniso_U_23
  _atom_site_aniso_U_13
  _atom_site_aniso_U_12
 Zn1 0.0105(3) 0.0330(4) 0.0267(4) -0.0020(3) 0.0036(2) -0.0012(2)
 Zn2 0.0102(3) 0.0307(3) 0.0288(4) 0.0028(3) 0.0032(2) 0.0007(2)
 O1 0.0178(19) 0.032(2) 0.042(2) 0.0048(18) 0.0045(16) -0.0082(16)
 O2 0.0089(17) 0.035(2) 0.041(2) -0.0032(17) 0.0037(16) -0.0018(15)
 O3 0.0173(18) 0.034(2) 0.041(2) -0.0022(18) 0.0052(16) 0.0036(16)
 O4 0.0093(17) 0.038(2) 0.037(2) 0.0054(17) 0.0043(16) -0.0003(15)
 O5 0.0144(19) 0.041(2) 0.056(3) -0.0083(19) 0.0015(19) -0.0002(17)
 O6 0.0133(19) 0.041(2) 0.055(3) 0.0066(19) 0.0027(18) -0.0016(17)
 O7 0.021(2) 0.045(2) 0.050(3) 0.008(2) 0.0063(18) -0.0133(18)
 O8 0.023(2) 0.044(2) 0.049(3) -0.014(2) 0.0061(18) 0.0105(18)
 N1 0.014(2) 0.036(3) 0.020(2) 0.003(2) 0.0013(18) -0.0021(19)
 N2 0.016(2) 0.031(2) 0.026(2) -0.007(2) -0.0009(19) 0.0020(18)
 N3 0.014(2) 0.034(2) 0.023(2) -0.0020(19) 0.0006(18) -0.0007(18)
 N4 0.011(2) 0.032(2) 0.032(3) -0.005(2) 0.0019(19) 0.0031(18)
 N5 0.019(2) 0.032(2) 0.028(3) -0.003(2) 0.007(2) -0.0033(19)
 N6 0.020(2) 0.032(2) 0.024(2) 0.001(2) 0.0070(19) -0.0018(19)
 N7 0.020(2) 0.028(2) 0.028(3) -0.003(2) 0.0058(19) -0.0009(19)
 N8 0.020(2) 0.032(3) 0.025(3) 0.002(2) 0.0059(19) -0.0012(19)
 N9 0.031(3) 0.034(3) 0.032(3) 0.005(2) 0.009(2) 0.008(2)
 N10 0.015(2) 0.035(3) 0.044(3) -0.012(2) 0.004(2) -0.0027(19)
 N11 0.029(3) 0.036(3) 0.038(3) -0.003(2) 0.007(2) -0.005(2)
 N12 0.016(2) 0.043(3) 0.040(3) 0.013(2) 0.005(2) 0.001(2)
 C1 0.011(3) 0.036(3) 0.024(3) -0.001(2) 0.000(2) -0.001(2)
 C2 0.011(2) 0.032(3) 0.030(3) 0.004(2) 0.005(2) 0.002(2)
 C3 0.013(3) 0.032(3) 0.029(3) -0.001(2) 0.004(2) -0.004(2)
 C4 0.017(3) 0.029(3) 0.032(3) 0.003(2) 0.004(2) -0.001(2)
 C5 0.014(3) 0.033(3) 0.027(3) 0.002(2) 0.004(2) 0.001(2)
 C6 0.015(3) 0.034(3) 0.025(3) -0.003(2) 0.002(2) -0.002(2)
 C7 0.019(3) 0.036(3) 0.028(3) -0.005(2) 0.003(2) 0.001(2)
 C8 0.013(3) 0.031(3) 0.031(3) 0.006(3) 0.006(2) 0.001(2)
 C9 0.015(3) 0.041(3) 0.032(3) -0.004(3) 0.001(2) 0.000(2)
 C10 0.017(3) 0.036(3) 0.036(3) 0.005(3) 0.005(2) 0.003(2)
 C11 0.009(2) 0.034(3) 0.027(3) -0.003(3) 0.001(2) 0.004(2)
 C12 0.025(3) 0.028(3) 0.026(3) -0.001(2) 0.000(2) -0.005(2)
 C13 0.013(3) 0.033(3) 0.043(3) 0.005(3) 0.004(2) 0.001(2)
 C14 0.012(3) 0.035(3) 0.031(3) -0.002(2) 0.006(2) -0.003(2)
 C15 0.018(3) 0.035(3) 0.048(4) -0.010(3) 0.009(3) 0.002(2)
 C16 0.019(3) 0.029(3) 0.048(4) 0.010(3) 0.006(3) -0.002(2)
 C17 0.011(3) 0.035(3) 0.034(3) 0.001(2) 0.004(2) 0.003(2)
 C18 0.011(3) 0.038(3) 0.039(3) 0.006(3) 0.001(2) 0.002(2)
 C19 0.028(3) 0.038(3) 0.032(3) 0.000(3) 0.009(3) -0.004(3)
 C20 0.017(3) 0.035(3) 0.055(4) -0.005(3) 0.007(3) 0.003(2)
 C21 0.012(3) 0.039(3) 0.047(4) 0.007(3) 0.004(2) 0.003(2)
 C22 0.013(3) 0.033(3) 0.049(4) -0.007(3) 0.002(2) -0.003(2)
 C23 0.029(3) 0.035(3) 0.040(4) 0.004(3) 0.008(3) 0.002(3)
 C24 0.012(3) 0.037(3) 0.058(4) -0.005(3) 0.002(3) -0.006(2)
 C25 0.014(3) 0.042(4) 0.035(3) 0.007(3) 0.007(2) 0.003(2)
 C26 0.022(3) 0.038(3) 0.033(3) -0.006(3) 0.010(3) 0.000(3)
 O9 0.028(2) 0.088(4) 0.069(3) 0.015(3) 0.003(2) -0.002(2)
 N18 0.042(3) 0.081(5) 0.063(4) 0.015(3) 0.018(3) 0.010(3)
 C31 0.035(4) 0.083(6) 0.058(5) 0.000(4) 0.014(4) -0.006(4)
 C37 0.040(4) 0.141(8) 0.059(5) -0.008(5) 0.001(4) 0.004(5)
 C43 0.101(7) 0.098(7) 0.164(10) 0.065(7) 0.061(7) 0.033(6)
 O10 0.028(2) 0.087(4) 0.073(3) -0.002(3) -0.006(2) -0.005(2)
 N15 0.030(3) 0.067(4) 0.057(4) -0.007(3) -0.003(3) 0.005(3)
 C28 0.044(4) 0.067(5) 0.071(5) -0.010(4) -0.015(4) 0.002(4)
 C38 0.035(4) 0.081(6) 0.154(9) -0.021(6) 0.018(5) -0.004(4)
 C42 0.054(5) 0.112(7) 0.101(7) -0.017(6) -0.005(5) 0.033(5)
 O11 0.064(3) 0.052(3) 0.086(4) -0.017(3) 0.017(3) -0.001(2)
 N16 0.045(3) 0.057(4) 0.058(4) 0.012(3) -0.006(3) -0.015(3)
 C30 0.060(5) 0.056(5) 0.070(5) -0.002(4) 0.017(4) -0.003(4)
 C41 0.046(5) 0.140(9) 0.097(7) 0.034(6) 0.017(5) -0.008(5)
 C44 0.168(10) 0.066(6) 0.079(7) -0.014(5) -0.038(6) -0.009(6)
 O12 0.031(3) 0.124(5) 0.063(3) 0.039(3) -0.014(2) -0.008(3)
 N14 0.027(3) 0.051(3) 0.052(3) -0.003(3) -0.011(2) -0.005(2)
 C29 0.035(4) 0.059(5) 0.078(6) 0.006(4) 0.009(4) 0.001(3)
 C35 0.067(5) 0.077(6) 0.076(6) 0.013(4) -0.024(4) -0.020(4)
 C39 0.043(4) 0.121(7) 0.079(6) -0.013(5) 0.015(4) -0.013(5)
 O13 0.121(5) 0.063(3) 0.061(3) 0.008(3) 0.025(3) -0.008(3)
 N13 0.039(3) 0.046(3) 0.038(3) 0.005(2) 0.002(2) 0.007(2)
 C27 0.061(5) 0.048(4) 0.045(4) 0.000(3) 0.012(4) 0.003(4)
 C33 0.077(6) 0.070(5) 0.072(6) 0.024(4) 0.009(4) 0.002(4)
 C36 0.056(5) 0.103(7) 0.073(6) 0.012(5) 0.015(4) 0.021(4)
 O14 0.115(5) 0.085(5) 0.101(5) 0.005(4) 0.022(4) -0.031(4)
 N17 0.048(3) 0.078(4) 0.055(4) -0.009(3) 0.012(3) 0.000(3)
 C32 0.065(5) 0.077(6) 0.068(6) -0.017(5) 0.009(4) -0.010(5)
 C34 0.065(5) 0.065(5) 0.082(6) -0.002(4) 0.024(4) 0.003(4)
 C40 0.092(7) 0.120(8) 0.057(5) -0.018(5) 0.012(5) 0.001(6)

_geom_special_details
;
 All esds (except the esd in the dihedral angle between two l.s. planes)
 are estimated using the full covariance matrix.  The cell esds are taken
 into account individually in the estimation of esds in distances, angles
 and torsion angles; correlations between esds in cell parameters are only
 used when they are defined by crystal symmetry.  An approximate (isotropic)
 treatment of cell esds is used for estimating esds involving l.s. planes.
;
loop_
  _geom_bond_atom_site_label_1
  _geom_bond_atom_site_label_2
  _geom_bond_distance
  _geom_bond_site_symmetry_2
  _geom_bond_publ_flag
 Zn1 O4 1.976(3) . ?
 Zn1 O6 2.458(4) . ?
 Zn1 O8 2.026(3) . ?
 Zn1 N3 2.041(4) 4_576 ?
 Zn1 N7 2.021(4) . ?
 Zn1 C25 2.570(5) . ?
 Zn2 O2 1.982(3) . ?
 Zn2 O5 2.412(4) 1_655 ?
 Zn2 O7 2.060(3) 1_655 ?
 Zn2 N4 2.044(4) 4_566 ?
 Zn2 N6 2.025(4) . ?
 Zn2 C26 2.565(5) 1_655 ?
 O1 C1 1.220(6) . ?
 O2 C5 1.292(6) . ?
 O3 C5 1.226(6) . ?
 O4 C1 1.300(6) . ?
 O5 C26 1.252(6) . ?
 O6 C25 1.258(6) . ?
 O7 C26 1.264(6) . ?
 O8 C25 1.258(6) . ?
 N1 N12 1.375(5) . ?
 N1 C4 1.325(6) . ?
 N1 C12 1.442(6) . ?
 N2 N10 1.369(5) . ?
 N2 C6 1.327(6) . ?
 N2 C7 1.450(6) . ?
 N3 C4 1.327(6) . ?
 N3 C10 1.375(6) . ?
 N4 C6 1.326(6) . ?
 N4 C9 1.378(6) . ?
 N5 N11 1.378(6) . ?
 N5 C7 1.442(6) . ?
 N5 C11 1.316(6) . ?
 N6 C11 1.321(6) . ?
 N6 C19 1.360(6) . ?
 N7 C8 1.326(6) . ?
 N7 C23 1.354(6) . ?
 N8 N9 1.368(6) . ?
 N8 C8 1.327(6) . ?
 N8 C12 1.446(6) . ?
 N9 C23 1.313(7) . ?
 N10 C9 1.295(6) . ?
 N11 C19 1.315(7) . ?
 N12 C10 1.298(6) . ?
 C1 C3 1.512(7) . ?
 C2 C5 1.517(6) . ?
 C2 C20 1.385(7) . ?
 C2 C22 1.388(7) . ?
 C3 C13 1.397(7) . ?
 C3 C18 1.367(7) . ?
 C13 C21 1.384(7) . ?
 C14 C16 1.403(7) . ?
 C14 C21 1.378(7) . ?
 C14 C26 1.495(7) . ?
 C15 C17 1.387(7) . ?
 C15 C22 1.387(7) . ?
 C16 C18 1.397(7) . ?
 C17 C24 1.375(7) . ?
 C17 C25 1.499(7) . ?
 C20 C24 1.385(7) . ?
 O9 C31 1.215(8) . ?
 N18 C31 1.327(9) . ?
 N18 C37 1.454(9) . ?
 N18 C43 1.461(9) . ?
 O10 C28 1.207(8) . ?
 N15 C28 1.337(8) . ?
 N15 C38 1.441(9) . ?
 N15 C42 1.427(8) . ?
 O11 C30 1.223(8) . ?
 N16 C30 1.305(8) . ?
 N16 C41 1.467(9) . ?
 N16 C44 1.426(9) . ?
 O12 C29 1.188(8) . ?
 N14 C29 1.331(8) . ?
 N14 C35 1.446(8) . ?
 N14 C39 1.450(9) . ?
 O13 C27 1.232(8) . ?
 N13 C27 1.306(8) . ?
 N13 C33 1.440(8) . ?
 N13 C36 1.446(8) . ?
 O14 C32 1.215(9) . ?
 N17 C32 1.325(9) . ?
 N17 C34 1.434(9) . ?
 N17 C40 1.444(9) . ?

loop_
  _geom_angle_atom_site_label_1
  _geom_angle_atom_site_label_2
  _geom_angle_atom_site_label_3
  _geom_angle
  _geom_angle_site_symmetry_1
  _geom_angle_site_symmetry_3
  _geom_angle_publ_flag
 O4 Zn1 O6 89.86(13) . . ?
 O4 Zn1 O8 126.60(15) . . ?
 O4 Zn1 N3 107.67(15) . 4_576 ?
 O4 Zn1 N7 111.06(15) . . ?
 O4 Zn1 C25 111.36(15) . . ?
 O6 Zn1 C25 28.86(14) . . ?
 O8 Zn1 O6 57.50(13) . . ?
 O8 Zn1 N3 90.64(15) . 4_576 ?
 O8 Zn1 C25 28.78(15) . . ?
 N3 Zn1 O6 147.68(14) 4_576 . ?
 N3 Zn1 C25 119.41(17) 4_576 . ?
 N7 Zn1 O6 87.40(15) . . ?
 N7 Zn1 O8 108.40(16) . . ?
 N7 Zn1 N3 109.97(16) . 4_576 ?
 N7 Zn1 C25 96.97(17) . . ?
 O2 Zn2 O5 90.67(13) . 1_655 ?
 O2 Zn2 O7 124.60(15) . 1_655 ?
 O2 Zn2 N4 108.00(15) . 4_566 ?
 O2 Zn2 N6 111.77(15) . . ?
 O2 Zn2 C26 110.82(15) . 1_655 ?
 O5 Zn2 C26 28.93(14) 1_655 1_655 ?
 O7 Zn2 O5 57.99(13) 1_655 1_655 ?
 O7 Zn2 C26 29.18(15) 1_655 1_655 ?
 N4 Zn2 O5 148.88(14) 4_566 1_655 ?
 N4 Zn2 O7 90.94(15) 4_566 1_655 ?
 N4 Zn2 C26 120.09(17) 4_566 1_655 ?
 N6 Zn2 O5 87.07(15) . 1_655 ?
 N6 Zn2 O7 110.73(16) . 1_655 ?
 N6 Zn2 N4 107.62(17) . 4_566 ?
 N6 Zn2 C26 98.14(16) . 1_655 ?
 C5 O2 Zn2 108.7(3) . . ?
 C1 O4 Zn1 109.1(3) . . ?
 C26 O5 Zn2 82.4(3) . 1_455 ?
 C25 O6 Zn1 80.5(3) . . ?
 C26 O7 Zn2 98.2(3) . 1_455 ?
 C25 O8 Zn1 100.4(3) . . ?
 N12 N1 C12 120.9(4) . . ?
 C4 N1 N12 110.6(4) . . ?
 C4 N1 C12 127.6(4) . . ?
 N10 N2 C7 120.3(4) . . ?
 C6 N2 N10 110.2(4) . . ?
 C6 N2 C7 128.5(4) . . ?
 C4 N3 Zn1 129.8(3) . 4_575 ?
 C4 N3 C10 103.2(4) . . ?
 C10 N3 Zn1 126.2(3) . 4_575 ?
 C6 N4 Zn2 129.7(3) . 4_565 ?
 C6 N4 C9 103.2(4) . . ?
 C9 N4 Zn2 126.6(3) . 4_565 ?
 N11 N5 C7 120.1(4) . . ?
 C11 N5 N11 110.3(4) . . ?
 C11 N5 C7 129.6(4) . . ?
 C11 N6 Zn2 126.7(4) . . ?
 C11 N6 C19 104.2(4) . . ?
 C19 N6 Zn2 127.1(4) . . ?
 C8 N7 Zn1 126.1(3) . . ?
 C8 N7 C23 104.0(4) . . ?
 C23 N7 Zn1 128.3(4) . . ?
 N9 N8 C12 121.4(4) . . ?
 C8 N8 N9 110.0(4) . . ?
 C8 N8 C12 128.6(4) . . ?
 C23 N9 N8 102.8(4) . . ?
 C9 N10 N2 103.1(4) . . ?
 C19 N11 N5 102.3(4) . . ?
 C10 N12 N1 102.3(4) . . ?
 O1 C1 O4 123.2(4) . . ?
 O1 C1 C3 120.5(4) . . ?
 O4 C1 C3 116.2(5) . . ?
 C20 C2 C5 118.8(5) . . ?
 C20 C2 C22 119.0(5) . . ?
 C22 C2 C5 122.1(4) . . ?
 C13 C3 C1 118.1(5) . . ?
 C18 C3 C1 122.3(4) . . ?
 C18 C3 C13 119.7(4) . . ?
 N1 C4 N3 109.4(4) . . ?
 O2 C5 C2 117.1(4) . . ?
 O3 C5 O2 123.9(4) . . ?
 O3 C5 C2 119.0(4) . . ?
 N4 C6 N2 109.5(4) . . ?
 N5 C7 N2 109.9(4) . . ?
 N7 C8 N8 109.4(4) . . ?
 N10 C9 N4 114.0(4) . . ?
 N12 C10 N3 114.5(4) . . ?
 N5 C11 N6 109.6(5) . . ?
 N1 C12 N8 108.8(4) . . ?
 C21 C13 C3 120.2(5) . . ?
 C16 C14 C26 120.3(5) . . ?
 C21 C14 C16 119.3(4) . . ?
 C21 C14 C26 120.3(5) . . ?
 C22 C15 C17 120.1(5) . . ?
 C18 C16 C14 119.7(5) . . ?
 C15 C17 C25 121.0(5) . . ?
 C24 C17 C15 119.4(5) . . ?
 C24 C17 C25 119.6(5) . . ?
 C3 C18 C16 120.6(5) . . ?
 N11 C19 N6 113.6(5) . . ?
 C24 C20 C2 120.4(5) . . ?
 C14 C21 C13 120.6(5) . . ?
 C15 C22 C2 120.4(5) . . ?
 N9 C23 N7 113.9(5) . . ?
 C17 C24 C20 120.6(5) . . ?
 O6 C25 Zn1 70.7(3) . . ?
 O6 C25 C17 119.4(5) . . ?
 O8 C25 Zn1 50.8(2) . . ?
 O8 C25 O6 121.1(5) . . ?
 O8 C25 C17 119.5(5) . . ?
 C17 C25 Zn1 167.4(4) . . ?
 O5 C26 Zn2 68.7(3) . 1_455 ?
 O5 C26 O7 121.0(5) . . ?
 O5 C26 C14 119.2(5) . . ?
 O7 C26 Zn2 52.6(2) . 1_455 ?
 O7 C26 C14 119.8(5) . . ?
 C14 C26 Zn2 169.3(4) . 1_455 ?
 C31 N18 C37 121.0(7) . . ?
 C31 N18 C43 121.8(7) . . ?
 C37 N18 C43 117.1(7) . . ?
 O9 C31 N18 126.2(7) . . ?
 C28 N15 C38 119.1(6) . . ?
 C28 N15 C42 123.9(6) . . ?
 C42 N15 C38 117.1(6) . . ?
 O10 C28 N15 126.7(7) . . ?
 C30 N16 C41 118.1(7) . . ?
 C30 N16 C44 124.2(7) . . ?
 C44 N16 C41 117.0(7) . . ?
 O11 C30 N16 128.7(7) . . ?
 C29 N14 C35 123.3(6) . . ?
 C29 N14 C39 118.7(6) . . ?
 C35 N14 C39 118.0(6) . . ?
 O12 C29 N14 127.3(7) . . ?
 C27 N13 C33 122.4(6) . . ?
 C27 N13 C36 120.4(6) . . ?
 C33 N13 C36 117.0(5) . . ?
 O13 C27 N13 125.9(7) . . ?
 C32 N17 C34 122.1(7) . . ?
 C32 N17 C40 120.3(7) . . ?
 C34 N17 C40 117.6(6) . . ?
 O14 C32 N17 126.9(8) . . ?

_shelx_res_file
;
TITL tgs142_a_1_a.res in P2(1)/c
    tgs142_a_1.res
    created by SHELXL-2017/1 at 17:22:40 on 16-Sep-2022
REM Old TITL tgs142_a_1 in P2(1)/c
REM SHELXT solution in P2(1)/c
REM R1 0.186, Rweak 0.003, Alpha 0.054, Orientation as input
REM Formula found by SHELXT: C53 N11 O12 Zn2
CELL 0.71073 19.9831 16.6095 17.4898 90 102.142 90
ZERR 8 0.0015 0.0013 0.0013 0 0.002 0
LATT 1
SYMM -X,0.5+Y,0.5-Z
SFAC C H N O Zn
UNIT 176 248 72 56 8

L.S. 6
PLAN  20
SIZE 0.26 0.15 0.08
TEMP -123(2)
list 4
fmap 2
acta
SHEL 999 0.86
OMIT -1 5 8
OMIT -9 1 2
OMIT 1 2 3
REM <olex2.extras>
REM <HklSrc "%.\\tgs142_a_1.hkl">
REM </olex2.extras>

WGHT    0.072700   11.529000
FVAR       0.16523
ZN1   5    0.528671    0.634168    0.623799    11.00000    0.01050    0.03301 =
         0.02672   -0.00205    0.00357   -0.00118
ZN2   5    1.029662    0.377802    0.627299    11.00000    0.01017    0.03066 =
         0.02879    0.00277    0.00317    0.00072
O1    4    0.394571    0.684728    0.594668    11.00000    0.01779    0.03242 =
         0.04164    0.00482    0.00455   -0.00823
O2    4    0.950019    0.439842    0.646343    11.00000    0.00887    0.03484 =
         0.04073   -0.00323    0.00370   -0.00180
O3    4    0.895462    0.328253    0.598559    11.00000    0.01727    0.03430 =
         0.04099   -0.00216    0.00523    0.00365
O4    4    0.449191    0.574901    0.646069    11.00000    0.00928    0.03774 =
         0.03694    0.00541    0.00430   -0.00030
O5    4    0.080751    0.499181    0.589860    11.00000    0.01441    0.04069 =
         0.05592   -0.00826    0.00151   -0.00017
O6    4    0.579622    0.506303    0.593938    11.00000    0.01328    0.04140 =
         0.05519    0.00659    0.00274   -0.00156
O7    4    0.130425    0.407176    0.672194    11.00000    0.02083    0.04482 =
         0.05020    0.00850    0.00625   -0.01335
O8    4    0.628725    0.607386    0.664520    11.00000    0.02282    0.04433 =
         0.04903   -0.01363    0.00613    0.01045
N1    3    0.521572    0.661772    0.260172    11.00000    0.01401    0.03640 =
         0.02012    0.00343    0.00126   -0.00208
N2    3    1.018905    0.325553    0.264194    11.00000    0.01564    0.03140 =
         0.02562   -0.00656   -0.00090    0.00199
N3    3    0.539182    0.762468    0.188355    11.00000    0.01433    0.03370 =
         0.02299   -0.00199    0.00058   -0.00072
N4    3    1.038592    0.223877    0.194515    11.00000    0.01103    0.03218 =
         0.03164   -0.00519    0.00187    0.00313
N5    3    0.994595    0.352391    0.388483    11.00000    0.01937    0.03245 =
         0.02802   -0.00314    0.00717   -0.00329
N6    3    1.016708    0.342855    0.514191    11.00000    0.02020    0.03226 =
         0.02384    0.00128    0.00697   -0.00180
N7    3    0.514930    0.660975    0.508859    11.00000    0.01954    0.02824 =
         0.02758   -0.00331    0.00577   -0.00086
N8    3    0.494986    0.642827    0.383503    11.00000    0.02009    0.03239 =
         0.02528    0.00189    0.00594   -0.00118
N9    3    0.467864    0.716699    0.393801    11.00000    0.03149    0.03439 =
         0.03166    0.00516    0.00873    0.00780
N10   3    1.088378    0.315178    0.282766    11.00000    0.01522    0.03531 =
         0.04370   -0.01164    0.00382   -0.00273
N11   3    0.967952    0.279063    0.403750    11.00000    0.02914    0.03642 =
         0.03819   -0.00335    0.00736   -0.00533
N12   3    0.591444    0.671629    0.276316    11.00000    0.01585    0.04323 =
         0.04008    0.01257    0.00480    0.00105
C1    1    0.394066    0.617126    0.621772    11.00000    0.01127    0.03616 =
         0.02406   -0.00086    0.00027   -0.00081
C2    1    0.827857    0.435322    0.630145    11.00000    0.01135    0.03161 =
         0.02989    0.00441    0.00532    0.00179
C3    1    0.327353    0.577978    0.628996    11.00000    0.01292    0.03236 =
         0.02884   -0.00135    0.00427   -0.00380
C4    1    0.491735    0.715922    0.208462    11.00000    0.01726    0.02882 =
         0.03229    0.00267    0.00385   -0.00150
AFIX  43
H4    2    0.443823    0.720683    0.188835    11.00000   -1.20000
AFIX   0
C5    1    0.895424    0.397113    0.623851    11.00000    0.01423    0.03257 =
         0.02666    0.00164    0.00441    0.00082
C6    1    0.990301    0.270331    0.212726    11.00000    0.01528    0.03386 =
         0.02464   -0.00327    0.00246   -0.00190
AFIX  43
H6    2    0.942586    0.264931    0.192122    11.00000   -1.20000
AFIX   0
C7    1    0.985888    0.380606    0.309006    11.00000    0.01922    0.03598 =
         0.02823   -0.00541    0.00274    0.00082
AFIX  23
H7A   2    1.006175    0.434939    0.308570    11.00000   -1.20000
H7B   2    0.936499    0.384394    0.284986    11.00000   -1.20000
AFIX   0
C8    1    0.522491    0.610658    0.452421    11.00000    0.01331    0.03077 =
         0.03065    0.00617    0.00642    0.00109
AFIX  43
H8    2    0.544209    0.559550    0.460114    11.00000   -1.20000
AFIX   0
C9    1    1.097971    0.254739    0.239585    11.00000    0.01468    0.04077 =
         0.03212   -0.00405    0.00146    0.00019
AFIX  43
H9    2    1.142023    0.233552    0.239020    11.00000   -1.20000
AFIX   0
C10   1    0.599184    0.732634    0.232591    11.00000    0.01710    0.03590 =
         0.03615    0.00477    0.00525    0.00302
AFIX  43
H10   2    0.642731    0.754851    0.231258    11.00000   -1.20000
AFIX   0
C11   1    1.023327    0.388350    0.454284    11.00000    0.00929    0.03397 =
         0.02726   -0.00309    0.00096    0.00431
AFIX  43
H11   2    1.045450    0.439261    0.458101    11.00000   -1.20000
AFIX   0
C12   1    0.489233    0.608394    0.306428    11.00000    0.02455    0.02783 =
         0.02574   -0.00112    0.00000   -0.00463
AFIX  23
H12A  2    0.511760    0.555020    0.310529    11.00000   -1.20000
H12B  2    0.440401    0.601172    0.281212    11.00000   -1.20000
AFIX   0
C13   1    0.266544    0.619255    0.599150    11.00000    0.01284    0.03270 =
         0.04332    0.00549    0.00361    0.00078
AFIX  43
H13   2    0.268054    0.671203    0.576846    11.00000   -1.20000
AFIX   0
C14   1    0.201072    0.509570    0.634637    11.00000    0.01190    0.03472 =
         0.03119   -0.00236    0.00594   -0.00304
C15   1    0.760983    0.546582    0.661105    11.00000    0.01798    0.03451 =
         0.04828   -0.01038    0.00919    0.00219
AFIX  43
H15   2    0.758792    0.599105    0.681942    11.00000   -1.20000
AFIX   0
C16   1    0.262137    0.468629    0.665761    11.00000    0.01925    0.02897 =
         0.04750    0.00993    0.00580   -0.00178
AFIX  43
H16   2    0.260825    0.417325    0.689414    11.00000   -1.20000
AFIX   0
C17   1    0.701202    0.503641    0.633675    11.00000    0.01092    0.03526 =
         0.03366    0.00056    0.00436    0.00330
C18   1    0.324881    0.503655    0.661810    11.00000    0.01119    0.03773 =
         0.03930    0.00616    0.00149    0.00226
AFIX  43
H18   2    0.366204    0.475553    0.682117    11.00000   -1.20000
AFIX   0
C19   1    0.982811    0.276532    0.480621    11.00000    0.02781    0.03770 =
         0.03212    0.00012    0.00900   -0.00441
AFIX  43
H19   2    0.970991    0.232563    0.509912    11.00000   -1.20000
AFIX   0
C20   1    0.768049    0.391890    0.605423    11.00000    0.01673    0.03516 =
         0.05457   -0.00523    0.00665    0.00286
AFIX  43
H20   2    0.770164    0.338097    0.587628    11.00000   -1.20000
AFIX   0
C21   1    0.204122    0.584641    0.602003    11.00000    0.01202    0.03902 =
         0.04680    0.00736    0.00436    0.00252
AFIX  43
H21   2    0.162978    0.612906    0.581264    11.00000   -1.20000
AFIX   0
C22   1    0.823954    0.512980    0.658170    11.00000    0.01275    0.03341 =
         0.04866   -0.00670    0.00210   -0.00284
AFIX  43
H22   2    0.864636    0.543303    0.675442    11.00000   -1.20000
AFIX   0
C23   1    0.481599    0.724705    0.470174    11.00000    0.02879    0.03529 =
         0.03977    0.00366    0.00756    0.00239
AFIX  43
H23   2    0.469267    0.771018    0.495955    11.00000   -1.20000
AFIX   0
C24   1    0.705168    0.426450    0.606498    11.00000    0.01169    0.03667 =
         0.05782   -0.00535    0.00161   -0.00600
AFIX  43
H24   2    0.664399    0.396556    0.588295    11.00000   -1.20000
AFIX   0
C25   1    0.632485    0.541006    0.631078    11.00000    0.01444    0.04192 =
         0.03522    0.00661    0.00670    0.00291
C26   1    0.133470    0.470071    0.632427    11.00000    0.02207    0.03837 =
         0.03266   -0.00634    0.00965   -0.00016

O9    4    0.747920    0.785453    0.691095    11.00000    0.02775    0.08766 =
         0.06950    0.01534    0.00341   -0.00167
N18   3    0.702820    0.872647    0.594202    11.00000    0.04236    0.08147 =
         0.06288    0.01509    0.01821    0.00983
C31   1    0.746183    0.850569    0.659109    11.00000    0.03526    0.08308 =
         0.05821   -0.00040    0.01379   -0.00645
AFIX  43
H31   2    0.778987    0.889362    0.682820    11.00000   -1.20000
AFIX   0
C37   1    0.652128    0.816702    0.552352    11.00000    0.04014    0.14071 =
         0.05930   -0.00802    0.00107    0.00368
AFIX 137
H37A  2    0.658162    0.764044    0.578164    11.00000   -1.50000
H37B  2    0.657937    0.811234    0.498335    11.00000   -1.50000
H37C  2    0.606114    0.837115    0.552346    11.00000   -1.50000
AFIX   0
C43   1    0.706556    0.951879    0.559046    11.00000    0.10093    0.09815 =
         0.16378    0.06490    0.06073    0.03326
AFIX 137
H43A  2    0.663163    0.980379    0.556216    11.00000   -1.50000
H43B  2    0.715143    0.945470    0.506240    11.00000   -1.50000
H43C  2    0.743868    0.982930    0.591101    11.00000   -1.50000
AFIX   0

O10   4    0.653012    0.375640    0.812314    11.00000    0.02766    0.08657 =
         0.07279   -0.00248   -0.00617   -0.00512
N15   3    0.769420    0.372369    0.839453    11.00000    0.03039    0.06740 =
         0.05654   -0.00710   -0.00258    0.00540
C28   1    0.706768    0.341821    0.814018    11.00000    0.04383    0.06660 =
         0.07075   -0.01034   -0.01481    0.00239
AFIX  43
H28   2    0.704320    0.287955    0.795371    11.00000   -1.20000
AFIX   0
C38   1    0.776220    0.453762    0.868631    11.00000    0.03478    0.08102 =
         0.15443   -0.02119    0.01810   -0.00402
AFIX 137
H38A  2    0.796458    0.487430    0.833416    11.00000   -1.50000
H38B  2    0.805844    0.454341    0.920965    11.00000   -1.50000
H38C  2    0.730980    0.474859    0.871351    11.00000   -1.50000
AFIX   0
C42   1    0.831120    0.329433    0.838558    11.00000    0.05351    0.11213 =
         0.10092   -0.01732   -0.00516    0.03349
AFIX 137
H42A  2    0.856275    0.320687    0.892364    11.00000   -1.50000
H42B  2    0.859468    0.360786    0.810008    11.00000   -1.50000
H42C  2    0.819982    0.277346    0.812685    11.00000   -1.50000
AFIX   0

O11   4    1.077539    0.611476    0.961698    11.00000    0.06422    0.05239 =
         0.08573   -0.01687    0.01719   -0.00136
N16   3    1.019882    0.510805    0.887071    11.00000    0.04482    0.05708 =
         0.05756    0.01158   -0.00602   -0.01466
C30   1    1.074121    0.548379    0.925032    11.00000    0.05983    0.05568 =
         0.06979   -0.00173    0.01654   -0.00261
AFIX  43
H30   2    1.116684    0.523360    0.924061    11.00000   -1.20000
AFIX   0
C41   1    0.952521    0.543800    0.890711    11.00000    0.04625    0.13996 =
         0.09675    0.03393    0.01701   -0.00789
AFIX 137
H41A  2    0.928478    0.506089    0.918635    11.00000   -1.50000
H41B  2    0.925720    0.551897    0.837533    11.00000   -1.50000
H41C  2    0.958368    0.595455    0.918395    11.00000   -1.50000
AFIX   0
C44   1    1.021099    0.433419    0.852108    11.00000    0.16811    0.06594 =
         0.07893   -0.01410   -0.03821   -0.00873
AFIX 137
H44A  2    1.068198    0.419893    0.849045    11.00000   -1.50000
H44B  2    0.992222    0.434117    0.799356    11.00000   -1.50000
H44C  2    1.003713    0.393058    0.883893    11.00000   -1.50000
AFIX   0

O12   4    0.839380    0.157797    0.699131    11.00000    0.03051    0.12369 =
         0.06332    0.03941   -0.01380   -0.00771
N14   3    0.738354    0.169236    0.613109    11.00000    0.02682    0.05136 =
         0.05201   -0.00330   -0.01076   -0.00472
C29   1    0.806305    0.169134    0.635240    11.00000    0.03518    0.05879 =
         0.07756    0.00589    0.00909    0.00110
AFIX  43
H29   2    0.831105    0.179262    0.595477    11.00000   -1.20000
AFIX   0
C35   1    0.702506    0.184267    0.533571    11.00000    0.06683    0.07716 =
         0.07559    0.01296   -0.02398   -0.02036
AFIX 137
H35A  2    0.677630    0.235357    0.531270    11.00000   -1.50000
H35B  2    0.670041    0.140457    0.516093    11.00000   -1.50000
H35C  2    0.735555    0.187173    0.499451    11.00000   -1.50000
AFIX   0
C39   1    0.697904    0.156275    0.671826    11.00000    0.04339    0.12050 =
         0.07852   -0.01265    0.01499   -0.01334
AFIX 137
H39A  2    0.728133    0.154961    0.723790    11.00000   -1.50000
H39B  2    0.673470    0.104931    0.661797    11.00000   -1.50000
H39C  2    0.664778    0.200174    0.669566    11.00000   -1.50000
AFIX   0

O13   4    0.485444    0.597447    0.055409    11.00000    0.12108    0.06306 =
         0.06083    0.00788    0.02497   -0.00779
N13   3    0.471898    0.488334    0.127951    11.00000    0.03933    0.04553 =
         0.03757    0.00484    0.00237    0.00744
C27   1    0.450237    0.552263    0.086579    11.00000    0.06094    0.04772 =
         0.04453   -0.00015    0.01154    0.00273
AFIX  43
H27   2    0.403030    0.565063    0.079933    11.00000   -1.20000
AFIX   0
C33   1    0.426374    0.435640    0.158132    11.00000    0.07725    0.07018 =
         0.07240    0.02360    0.00865    0.00166
AFIX 137
H33A  2    0.379617    0.456823    0.144194    11.00000   -1.50000
H33B  2    0.440779    0.432427    0.215180    11.00000   -1.50000
H33C  2    0.427748    0.381816    0.135560    11.00000   -1.50000
AFIX   0
C36   1    0.542779    0.463895    0.139478    11.00000    0.05560    0.10340 =
         0.07250    0.01220    0.01510    0.02107
AFIX 137
H36A  2    0.546378    0.416560    0.107135    11.00000   -1.50000
H36B  2    0.560090    0.450531    0.194674    11.00000   -1.50000
H36C  2    0.569901    0.508034    0.124436    11.00000   -1.50000
AFIX   0

O14   4    0.840527    0.881768    0.492391    11.00000    0.11477    0.08491 =
         0.10138    0.00533    0.02236   -0.03097
N17   3    0.799963    0.753892    0.473887    11.00000    0.04803    0.07788 =
         0.05484   -0.00881    0.01187   -0.00021
C32   1    0.834346    0.813466    0.514774    11.00000    0.06503    0.07705 =
         0.06774   -0.01677    0.00864   -0.01019
AFIX  43
H32   2    0.856495    0.801506    0.567100    11.00000   -1.20000
AFIX   0
C34   1    0.794388    0.675914    0.507120    11.00000    0.06468    0.06481 =
         0.08191   -0.00204    0.02419    0.00257
AFIX 137
H34A  2    0.815691    0.635650    0.478904    11.00000   -1.50000
H34B  2    0.745973    0.662548    0.502835    11.00000   -1.50000
H34C  2    0.817687    0.676235    0.562341    11.00000   -1.50000
AFIX   0
C40   1    0.765023    0.766594    0.393724    11.00000    0.09176    0.11957 =
         0.05668   -0.01812    0.01173    0.00110
AFIX 137
H40A  2    0.716262    0.754361    0.388182    11.00000   -1.50000
H40B  2    0.784677    0.731191    0.359366    11.00000   -1.50000
H40C  2    0.770421    0.822847    0.379230    11.00000   -1.50000
AFIX   0
HKLF 4


REM  tgs142_a_1_a.res in P2(1)/c
REM R1 =  0.0506 for    5414 Fo > 4sig(Fo)  and  0.1102 for all    9328 data
REM    715 parameters refined using      0 restraints

END

WGHT      0.0721     11.6865

REM Highest difference peak  0.697,  deepest hole -0.526,  1-sigma level  0.086
Q1    1   0.5263  0.3809  0.1240  11.00000  0.05    0.70
Q2    1   0.9734  0.3992  0.8773  11.00000  0.05    0.62
Q3    1   0.9562  0.4603  0.8543  11.00000  0.05    0.49
Q4    1   1.0909  0.4770  0.8653  11.00000  0.05    0.48
Q5    1   1.0163  0.5764  0.9319  11.00000  0.05    0.47
Q6    1   1.0186  0.1838  0.1485  11.00000  0.05    0.46
Q7    1   0.4146  0.6361  0.1202  11.00000  0.05    0.46
Q8    1   1.0918  0.6199  0.8784  11.00000  0.05    0.44
Q9    1   0.6505  0.6384  0.6305  11.00000  0.05    0.44
Q10   1   0.5204  0.8089  0.1576  11.00000  0.05    0.43
Q11   1   1.0260  0.1745  0.5113  11.00000  0.05    0.42
Q12   1   0.5368  0.6913  0.5978  11.00000  0.05    0.42
Q13   1   0.9644  0.3617  0.1786  11.00000  0.05    0.42
Q14   1   1.0343  0.2154  0.1263  11.00000  0.05    0.41
Q15   1   0.5417  0.5645  0.5869  11.00000  0.05    0.40
Q16   1   0.5212  0.7405  0.5696  11.00000  0.05    0.39
Q17   1   0.6568  0.8632  0.4982  11.00000  0.05    0.39
Q18   1   0.5115  0.6364  0.5487  11.00000  0.05    0.38
Q19   1   0.5018  0.5822  0.1110  11.00000  0.05    0.37
Q20   1   0.5291  0.4973  0.3575  11.00000  0.05    0.36
;
_shelx_res_checksum                81978
_shelx_hkl_file
;
   0   0  -1    0.10    0.10
   0   0  -1   -0.40    0.40
   0   0  -1   -0.20    0.20
   0   0   1    0.00    0.20
   0   0   1   -0.20    0.20
   0   0   1   -0.20    0.20
   0   0  -2    7.90    1.90
   0   0  -2    5.30    1.80
   0   0   2    4.10    1.70
   0   0  -3   -1.40    1.50
   0   0  -3   -0.40    0.50
   0   0  -3   -0.40    1.60
   0   0   3    1.20    2.20
   0   0   3   -0.50    0.50
   0   0   3    0.70    1.50
   0   0  -4 9638.83  226.18
   0   0  -4 9999.00  226.38
   0   0   4 9539.65  226.18
   0   0   4 9808.82  285.47
   0   0  -5   -0.30    2.30
   0   0  -5    4.60    2.60
   0   0  -5   -0.20    0.70
   0   0   5    1.50    2.50
   0   0   5    5.80    3.00
   0   0   5   -0.50    0.40
   0   0  -6  321.87    9.30
   0   0  -6  309.67    9.40
   0   0   6  310.77    9.30
   0   0   6  303.77   11.60
   0   0  -7    2.40    2.50
   0   0  -7    0.60    1.70
   0   0  -7    1.20    2.80
   0   0   7   -3.20    2.90
   0   0   7    0.00    0.60
   0   0   7   -4.90    3.40
   0   0  -8 2020.80   47.10
   0   0  -8 1902.31   47.00
   0   0   8 1918.91   59.19
   0   0   8 1971.30   47.10
   0   0  -9    0.90    3.40
   0   0  -9   -0.20    2.00
   0   0  -9   -2.10    3.40
   0   0   9    1.20    1.50
   0   0   9    4.10    3.50
   0   0   9    5.70    4.70
   0   0 -10  195.48    8.20
   0   0 -10  173.08   10.00
   0   0 -10  223.08    9.00
   0   0  10  226.18   11.30
   0   0  10  208.78    9.00
   0   0 -11    2.10    3.60
   0   0 -11    2.90    4.70
   0   0 -11   -1.90    4.00
   0   0  11    1.90    4.20
   0   0  11   -1.10    2.40
   0   0  11    0.90    5.50
   0   0 -12  533.45   16.20
   0   0 -12  531.85   16.00
   0   0  12  513.75   20.70
   0   0  12  547.05   16.30
   0   0 -13   -6.00    4.90
   0   0 -13   -0.40    4.20
   0   0  13   -6.20    4.80
   0   0  13   -1.20    6.70
   0   0 -14   31.10    5.30
   0   0 -14   25.40    6.00
   0   0  14   29.00    8.10
   0   0  14   36.30    6.10
   0   0 -15    3.80    4.90
   0   0 -15   -3.70    5.90
   0   0  15    0.70    8.20
   0   0  15    1.20    6.00
   0   0 -16  163.48   11.40
   0   0  16  156.48   11.60
   0   0  16  136.59   14.50
   0   0 -17    8.80    7.40
   0   0  17    8.00   10.20
   0   0  17    0.70    7.10
   0   0 -18   -7.40    7.70
   0   0  18  -20.10    7.20
   0   0 -19   -0.40    8.00
   0   0  19    2.80    8.00
   0   0 -20   33.40    9.10
   0   0  20   25.60    8.80
   0  -1 -20    7.90    8.90
   0   1  19   27.10    8.40
   0  -1 -19   33.90    8.80
   0   1  18   -6.40   10.20
   0   1  18  -12.10    7.20
   0  -1 -18   -3.50    7.50
   0   1  17   31.30    7.40
   0   1  17   30.00   10.50
   0  -1 -17   34.80    7.70
   0   1  16    0.00    6.50
   0   1  16   12.80    8.90
   0  -1 -16    2.30    5.30
   0  -1 -16    3.10    6.70
   0   1  15   15.80    8.80
   0   1  15   18.90    6.20
   0  -1 -15   19.80    6.40
   0  -1 -15   22.10    5.30
   0   1  14    8.90    7.60
   0   1  14    1.20    5.50
   0  -1 -14   -8.40    4.40
   0  -1 -14   -0.70    5.70
   0   1  13   53.19    8.10
   0   1  13   58.99    5.90
   0  -1 -13   61.69    6.10
   0  -1 -13   47.20    5.20
   0   1  12    9.40    6.20
   0   1  12   -2.80    4.50
   0  -1 -12   -2.30    3.70
   0  -1 -12   -2.30    4.60
   0   1  11  149.09   10.70
   0   1  11  148.89    7.90
   0   1  11  149.59    8.20
   0  -1 -11  147.49    7.50
   0  -1 -11  151.08    8.40
   0   1  10  146.59    9.70
   0   1  10  140.69    7.50
   0   1  10  141.39    7.10
   0  -1 -10  140.09    7.70
   0  -1 -10  112.69    8.00
   0   1   9  471.95   13.50
   0   1   9  469.25   17.20
   0   1   9  467.15   13.50
   0  -1  -9  439.06   16.60
   0  -1  -9  454.75   13.50
   0  -1  -9  448.06   13.20
   0   1   8    3.80    3.10
   0   1   8    5.20    4.10
   0   1   8   -0.90    2.80
   0  -1  -8    5.40    2.70
   0  -1  -8    5.40    3.80
   0  -1  -8    6.40    3.10
   0   1   7  723.33   18.10
   0   1   7  684.33   22.70
   0   1   7  693.43   18.10
   0  -1  -7  671.63   18.00
   0  -1  -7  710.53   17.90
   0   1   6   20.80    2.60
   0   1   6   24.20    2.90
   0   1   6   26.60    4.10
   0  -1  -6   20.30    2.90
   0  -1  -6   22.90    2.70
   0   1   5  981.10   23.00
   0   1   5  918.11   29.00
   0   1   5  935.61   23.00
   0  -1  -5  871.81   28.90
   0  -1  -5  957.60   23.00
   0  -1  -5  965.00   23.00
   0   1   4   77.89    4.00
   0   1   4   79.99    5.50
   0   1   4   79.79    4.40
   0  -1  -4   74.19    4.30
   0  -1  -4   88.29    5.60
   0  -1  -4   75.29    4.20
   0   1   3 2007.90   58.39
   0   1   3 1986.60   46.30
   0   1   3 1975.40   46.40
   0  -1  -3 1900.21   46.30
   0  -1  -3 1947.71   46.30
   0  -1  -3 2055.89   58.39
   0   1   2   54.29    2.30
   0   1   2   53.69    2.40
   0   1   2   55.79    3.10
   0  -1  -2   54.79    2.40
   0  -1  -2   54.19    3.30
   0  -1  -2   51.99    2.30
   0   1   1 1252.07   28.90
   0   1   1 1168.28   28.90
   0  -1  -1 1241.78   28.90
   0  -1  -1 1304.37   36.40
   0   1   0    0.00    0.20
   0   1   0    0.00    0.20
   0   1   0   -0.10    0.30
   0  -1   0   -0.10    0.20
   0  -1   0    0.00    0.50
   0  -1   0    0.10    0.30
   0   1  -1 1284.57   29.60
   0   1  -1 1344.37   37.10
   0  -1   1 1151.58   37.00
   0  -1   1 1287.47   29.60
   0   1  -2   56.19    2.80
   0   1  -2   57.79    2.70
   0   1  -2   56.19    3.20
   0  -1   2   57.69    2.70
   0  -1   2   54.89    3.10
   0  -1   2   58.49    2.80
   0   1  -3 2109.09   60.69
   0   1  -3 2009.90   48.30
   0   1  -3 2076.59   48.40
   0  -1   3 2024.60   60.69
   0  -1   3 2068.59   48.30
   0  -1   3 2061.09   48.40
   0   1  -4   77.59    4.60
   0   1  -4   83.39    5.60
   0   1  -4   86.89    4.70
   0  -1   4   78.69    4.60
   0  -1   4   77.59    4.60
   0  -1   4   83.19    5.60
   0   1  -5  941.01   23.30
   0   1  -5  991.40   29.30
   0   1  -5  957.00   23.30
   0  -1   5  911.61   23.20
   0  -1   5  966.80   29.30
   0  -1   5  909.51   23.30
   0   1  -6   25.20    3.80
   0   1  -6   22.30    2.90
   0   1  -6   24.60    3.10
   0  -1   6   21.10    3.00
   0  -1   6   22.80    3.90
   0   1  -7  700.33   18.50
   0   1  -7  737.33   18.60
   0   1  -7  723.83   23.30
   0  -1   7  704.13   23.30
   0  -1   7  709.23   18.50
   0   1  -8    6.60    3.90
   0   1  -8    4.60    3.30
   0   1  -8    4.20    2.30
   0  -1   8    8.20    4.40
   0  -1   8    5.90    3.00
   0  -1   8   12.60    3.60
   0   1  -9  486.55   13.80
   0   1  -9  466.95   17.40
   0   1  -9  472.85   14.00
   0  -1   9  453.55   17.40
   0  -1   9  489.95   14.10
   0  -1   9  480.25   13.70
   0   1 -10  138.19    7.60
   0   1 -10  146.39    7.50
   0   1 -10  146.99    9.40
   0  -1  10  127.09    6.80
   0  -1  10  146.89    9.60
   0  -1  10  133.29    7.80
   0   1 -11  150.98   10.20
   0   1 -11  143.09    8.50
   0   1 -11  170.48    8.10
   0  -1  11  152.28    8.50
   0  -1  11  144.19   10.40
   0   1 -12    0.40    4.00
   0   1 -12    2.30    4.60
   0  -1  12    8.20    6.10
   0  -1  12    4.10    4.70
   0   1 -13   52.59    5.40
   0   1 -13   44.80    6.00
   0  -1  13   45.20    7.80
   0  -1  13   49.80    6.10
   0   1 -14    3.10    4.80
   0   1 -14    4.50    5.60
   0  -1  14   -1.20    5.60
   0  -1  14    7.50    7.60
   0   1 -15   23.00    6.50
   0  -1  15   24.10    8.80
   0  -1  15   25.70    6.60
   0   1 -16    4.40    6.70
   0  -1  16    2.30    8.90
   0  -1  16   -0.40    6.60
   0   1 -17   32.30    7.90
   0  -1  17   40.10   10.90
   0  -1  17   42.80    7.80
   0   1 -18    0.30    7.70
   0  -1  18   -5.70    7.50
   0   1 -19   31.70    8.90
   0  -1  19   21.30    8.50
   0   1 -20    1.50    8.80
   0  -1  20    5.90    8.80
   0  -2 -20   -4.80    8.70
   0   2  19   10.70   11.70
   0   2  19    2.40    8.20
   0  -2 -19    8.60    8.40
   0   2  18    8.80   10.80
   0   2  18   -3.80    7.60
   0  -2 -18   -0.60    7.60
   0   2  17    2.80    7.00
   0   2  17   17.00   10.00
   0  -2 -17   10.30    7.30
   0   2  16   -1.40    6.20
   0   2  16    3.70    9.30
   0  -2 -16   -1.80    5.10
   0  -2 -16    3.60    6.70
   0   2  15   -2.80    5.70
   0   2  15    9.00    8.30
   0  -2 -15   -0.90    5.80
   0  -2 -15   -0.20    4.70
   0   2  14   37.30    6.00
   0   2  14   43.10    8.40
   0  -2 -14   31.70    5.00
   0  -2 -14   30.40    6.10
   0   2  13    2.10    6.90
   0   2  13   -6.10    4.80
   0  -2 -13    2.90    5.10
   0  -2 -13   -2.00    4.00
   0   2  12    0.30    6.30
   0   2  12    4.40    4.50
   0  -2 -12    9.50    4.70
   0  -2 -12    7.00    3.80
   0   2  11   31.90    4.20
   0   2  11   40.30    4.80
   0   2  11   31.70    6.60
   0  -2 -11   44.80    4.90
   0   2  10  364.36   15.30
   0   2  10  373.06   11.90
   0   2  10  384.26   11.70
   0  -2 -10  392.46   12.20
   0  -2 -10  380.16   15.30
   0  -2 -10  334.37   11.30
   0   2   9    6.20    3.40
   0   2   9   15.60    4.80
   0   2   9    9.10    3.60
   0  -2  -9   13.30    4.80
   0  -2  -9    4.50    2.90
   0  -2  -9   13.70    3.80
   0   2   8   21.40    4.50
   0   2   8   19.20    3.30
   0   2   8   24.60    3.20
   0  -2  -8   21.00    3.10
   0  -2  -8   21.20    3.60
   0  -2  -8   24.10    4.80
   0   2   7   42.40    3.50
   0   2   7   49.50    4.60
   0   2   7   52.29    5.20
   0  -2  -7   41.50    3.60
   0  -2  -7   52.29    4.90
   0  -2  -7   49.10    4.60
   0   2   6   66.79    4.50
   0   2   6   71.89    4.70
   0   2   6   74.89    6.40
   0  -2  -6   66.39    4.50
   0  -2  -6   70.89    4.80
   0   2   5    1.90    2.30
   0   2   5   -5.00    3.10
   0   2   5    4.60    2.10
   0  -2  -5   -2.90    3.10
   0  -2  -5   -0.20    2.30
   0  -2  -5    4.00    2.40
   0   2   4 4455.05  132.69
   0   2   4 4418.36  105.39
   0   2   4 4581.14  105.49
   0   2   4 4640.54  179.68
   0  -2  -4 4543.75  105.49
   0  -2  -4 4582.24  132.79
   0  -2  -4 4476.45  105.39
   0   2   3   25.70    2.00
   0   2   3   30.40    3.10
   0   2   3   21.50    2.00
   0  -2  -3   26.10    3.10
   0  -2  -3   24.00    2.10
   0  -2  -3   19.20    2.00
   0   2   2   34.70    2.30
   0   2   2   40.00    2.90
   0   2   2   32.60    2.30
   0  -2  -2   38.10    3.20
   0  -2  -2   32.50    2.30
   0   2   1   63.59    2.40
   0   2   1   65.69    2.30
   0   2   1   67.49    2.70
   0  -2  -1   61.49    2.30
   0  -2  -1   64.29    2.30
   0  -2  -1   69.19    2.90
   0   2   0    1.30    0.90
   0   2   0    2.40    1.50
   0   2   0    2.40    1.00
   0  -2   0    1.40    1.00
   0  -2   0    2.60    1.50
   0  -2   0    2.90    1.00
   0   2  -1   72.49    2.70
   0  -2   1   70.09    3.30
   0  -2   1   67.99    2.80
   0  -2   1   68.79    2.60
   0   2  -2   40.40    2.80
   0   2  -2   35.00    3.00
   0   2  -2   37.10    2.90
   0  -2   2   38.00    2.90
   0  -2   2   34.20    2.90
   0  -2   2   37.40    2.90
   0   2  -3   30.20    3.10
   0   2  -3   25.30    2.50
   0   2  -3   27.20    2.60
   0  -2   3   29.10    2.60
   0  -2   3   27.10    3.00
   0  -2   3   29.00    2.50
   0   2  -4 4512.65  106.59
   0   2  -4 4572.84  106.49
   0   2  -4 4678.13  133.79
   0  -2   4 4501.65  133.69
   0  -2   4 4575.54  106.59
   0  -2   4 4547.25  106.59
   0   2  -5    1.10    2.40
   0   2  -5   -3.80    3.20
   0   2  -5    1.70    2.60
   0  -2   5    0.60    2.40
   0  -2   5   -0.50    3.30
   0  -2   5    4.40    2.60
   0   2  -6   80.19    4.90
   0   2  -6   67.99    5.20
   0   2  -6   72.29    6.10
   0  -2   6   70.29    6.20
   0  -2   6   71.59    5.10
   0   2  -7   50.49    4.80
   0   2  -7   45.40    3.90
   0  -2   7   40.70    4.70
   0  -2   7   39.60    3.90
   0  -2   7   46.10    3.70
   0   2  -8   19.90    3.50
   0   2  -8   17.00    3.60
   0   2  -8   22.80    4.30
   0  -2   8   21.10    3.40
   0  -2   8   26.90    4.90
   0  -2   8   16.60    3.70
   0   2  -9   15.60    3.80
   0   2  -9   12.30    4.50
   0   2  -9   16.00    3.70
   0  -2   9   11.40    3.50
   0  -2   9   14.60    3.90
   0   2 -10  384.96   15.50
   0   2 -10  375.06   12.40
   0   2 -10  388.36   12.20
   0  -2  10  381.66   15.40
   0  -2  10  383.96   12.20
   0  -2  10  395.26   12.50
   0   2 -11   39.60    5.90
   0   2 -11   37.00    4.40
   0   2 -11   42.60    5.10
   0  -2  11   46.00    6.70
   0  -2  11   41.60    5.10
   0   2 -12    1.70    4.70
   0   2 -12    9.30    4.10
   0  -2  12    0.90    6.00
   0  -2  12    1.40    4.80
   0   2 -13   -3.20    4.40
   0   2 -13    3.60    5.30
   0  -2  13   -1.90    6.60
   0  -2  13  -10.30    5.20
   0   2 -14   30.80    6.30
   0  -2  14   39.00    8.30
   0  -2  14   27.10    6.30
   0   2 -15    2.60    6.30
   0  -2  15   -7.60    8.20
   0  -2  15    4.10    6.30
   0   2 -16   -8.50    6.60
   0  -2  16    1.40    6.80
   0  -2  16    5.10    9.30
   0   2 -17    4.30    7.40
   0  -2  17   15.00    7.60
   0   2 -18   -7.70    7.70
   0  -2  18    0.50    7.70
   0   2 -19    6.60    8.50
   0  -2  19    9.80    8.30
   0   2 -20    4.00    9.10
   0  -2  20    6.70    8.70
   0  -3 -20   -0.80    9.10
   0   3  19   11.60   11.60
   0  -3 -19   24.70    8.70
   0   3  18    8.40   10.70
   0   3  18   12.10    7.60
   0  -3 -18    1.80    7.80
   0   3  17   93.79   11.70
   0   3  17   82.49    8.40
   0  -3 -17   84.59    8.90
   0   3  16    6.60    9.30
   0   3  16    2.90    6.50
   0  -3 -16    9.10    6.90
   0  -3 -16    0.50    5.40
   0   3  15   18.90    6.30
   0   3  15   19.40    9.00
   0  -3 -15    9.20    6.40
   0  -3 -15   16.40    5.00
   0   3  14   -1.00    5.50
   0   3  14    0.80    8.00
   0  -3 -14    0.50    4.30
   0  -3 -14    8.30    5.70
   0   3  13   97.29   11.40
   0   3  13   94.19    8.50
   0  -3 -13  115.89    9.00
   0  -3 -13   99.59    7.60
   0   3  12    1.50    4.30
   0   3  12   -1.40    6.20
   0  -3 -12    0.70    3.00
   0  -3 -12   -2.10    4.60
   0   3  11   80.29    9.80
   0   3  11   92.09    7.30
   0  -3 -11   89.49    7.20
   0   3  10    3.60    5.20
   0   3  10    3.50    3.20
   0   3  10    5.90    3.60
   0  -3 -10    4.70    3.00
   0  -3 -10    6.30    3.80
   0  -3 -10    3.10    5.00
   0   3   9 1157.78   28.90
   0   3   9 1167.28   28.80
   0   3   9 1097.69   36.50
   0  -3  -9 1147.59   36.70
   0  -3  -9 1187.08   28.80
   0  -3  -9 1162.38   28.90
   0   3   8    4.50    2.80
   0   3   8    5.30    4.30
   0   3   8    0.60    3.10
   0  -3  -8   -1.00    4.20
   0  -3  -8    2.40    3.20
   0  -3  -8    4.60    3.00
   0   3   7   36.10    4.80
   0   3   7   31.40    3.30
   0   3   7   25.50    2.90
   0  -3  -7   28.30    3.30
   0  -3  -7   31.10    4.60
   0  -3  -7   31.30    3.10
   0   3   6    0.90    2.20
   0   3   6   -0.40    3.50
   0   3   6    3.50    2.50
   0  -3  -6   -0.20    2.50
   0  -3  -6    4.00    2.40
   0  -3  -6    2.90    2.50
   0   3   5 1017.40   24.40
   0   3   5  987.10   31.00
   0   3   5  986.40   24.50
   0   3   5 1041.60   41.40
   0  -3  -5  989.80   24.40
   0  -3  -5 1024.70   31.00
   0  -3  -5  999.00   24.50
   0   3   4   50.49    3.70
   0   3   4   44.90    3.80
   0   3   4   50.89    4.90
   0  -3  -4   46.60    3.60
   0  -3  -4   51.89    5.20
   0  -3  -4   45.80    3.60
   0   3   3   19.60    2.10
   0  -3  -3   17.00    2.00
   0   3   2   16.60    1.80
   0   3   2   27.50    2.50
   0   3   2   18.20    1.80
   0  -3  -2   21.60    1.90
   0  -3  -2   17.20    1.80
   0  -3  -2   28.30    2.70
   0   3   1  401.96   11.90
   0   3   1  406.56    9.90
   0   3   1  388.86    9.80
   0  -3  -1  393.86    9.90
   0  -3  -1  393.36    9.80
   0   3   0   -2.00    2.30
   0   3   0   -1.90    1.40
   0   3   0   -2.10    1.40
   0  -3   0   -2.00    2.40
   0  -3   0   -0.60    1.40
   0  -3   0   -0.40    1.40
   0   3  -1  399.96   10.30
   0   3  -1  406.46   12.00
   0  -3   1  418.56   10.30
   0  -3   1  399.36   10.30
   0  -3   1  400.46   12.00
   0   3  -2   24.00    2.40
   0   3  -2   26.20    2.50
   0  -3   2   27.60    2.50
   0  -3   2   22.50    2.40
   0   3  -3   38.90    4.20
   0  -3   3   29.80    2.90
   0  -3   3   28.00    2.90
   0   3  -4   47.80    4.30
   0   3  -4   50.99    4.60
   0   3  -4   52.79    5.00
   0  -3   4   47.90    3.40
   0  -3   4   53.69    4.50
   0  -3   4   44.60    4.60
   0   3  -5 1037.20   31.30
   0   3  -5 1008.00   25.20
   0   3  -5 1039.50   25.20
   0  -3   5 1017.70   25.20
   0  -3   5 1038.30   25.20
   0  -3   5  976.30   31.20
   0   3  -6   -0.30    3.40
   0   3  -6   -1.90    1.90
   0   3  -6   -0.30    2.80
   0  -3   6    1.00    3.60
   0  -3   6    1.40    2.80
   0  -3   6   -1.10    1.80
   0   3  -7   22.60    3.30
   0   3  -7   19.60    3.50
   0   3  -7   28.50    4.40
   0  -3   7   25.20    3.40
   0  -3   7   28.40    4.60
   0  -3   7   21.00    3.50
   0   3  -8    5.60    3.10
   0   3  -8    0.10    4.00
   0   3  -8    5.20    3.50
   0  -3   8    0.60    4.40
   0  -3   8    7.00    3.00
   0  -3   8    5.10    3.60
   0   3  -9 1162.48   36.80
   0   3  -9 1171.18   29.60
   0   3  -9 1167.58   29.40
   0  -3   9 1196.48   29.70
   0  -3   9 1136.29   36.80
   0  -3   9 1138.89   29.40
   0   3 -10   -0.20    3.90
   0   3 -10   -1.30    4.50
   0   3 -10    3.00    3.40
   0  -3  10    2.20    3.30
   0  -3  10    8.20    5.20
   0  -3  10    7.60    4.10
   0   3 -11   98.09    7.80
   0   3 -11   86.39    8.90
   0   3 -11   95.99    7.20
   0  -3  11  101.69    7.90
   0  -3  11   84.99    9.20
   0   3 -12    1.20    4.80
   0   3 -12   -6.10    3.90
   0  -3  12   -6.80    4.80
   0  -3  12    3.90    5.90
   0   3 -13   87.69    7.10
   0  -3  13   91.49    7.30
   0  -3  13   98.89   11.10
   0   3 -14   -2.90    5.80
   0  -3  14    0.50    7.80
   0  -3  14    1.10    5.90
   0   3 -15    9.20    6.50
   0  -3  15   26.40    6.80
   0   3 -16    3.00    6.90
   0  -3  16   14.30    7.10
   0   3 -17   69.99    8.80
   0  -3  17   85.49    9.20
   0   3 -18    3.70    8.00
   0  -3  18    1.30    8.10
   0   3 -19   28.80    8.90
   0  -3  19   17.30    8.70
   0   3 -20   -1.20    8.90
   0  -3  20    8.50    9.00
   0  -4 -20   25.60    9.50
   0   4  19    1.30   11.20
   0  -4 -19   -7.40    8.30
   0   4  18   19.50   10.90
   0   4  18   11.10    7.50
   0  -4 -18   12.20    8.00
   0   4  17   -4.50    6.70
   0   4  17   13.70   10.00
   0  -4 -17    6.40    7.20
   0   4  16  219.38   16.50
   0   4  16  228.68   12.60
   0  -4 -16  256.87   13.10
   0   4  15   13.40    9.00
   0   4  15    7.60    6.00
   0  -4 -15   -5.00    6.20
   0  -4 -15   -1.30    4.60
   0   4  14   14.70    5.70
   0   4  14    8.50    8.30
   0  -4 -14   11.70    4.50
   0  -4 -14   15.60    6.00
   0   4  13    4.00    5.00
   0   4  13    2.60    7.30
   0  -4 -13    4.80    5.10
   0  -4 -13    4.90    3.80
   0   4  12  292.77   15.10
   0   4  12  319.27   11.60
   0  -4 -12  304.77   11.60
   0   4  11   16.00    4.30
   0   4  11   11.50    6.10
   0  -4 -11   12.90    3.40
   0  -4 -11   21.70    4.50
   0   4  10    8.50    3.80
   0   4  10   -1.80    5.20
   0   4  10    3.60    3.30
   0  -4 -10    7.70    3.80
   0  -4 -10    4.30    3.20
   0  -4 -10   -8.00    4.70
   0   4   9   -2.40    2.80
   0   4   9   -1.70    4.60
   0   4   9   -1.10    3.30
   0  -4  -9   -5.70    4.20
   0  -4  -9   -5.40    3.30
   0  -4  -9   -2.70    3.10
   0   4   8  422.76   12.00
   0   4   8  411.96   16.00
   0   4   8  431.96   12.40
   0  -4  -8  418.06   15.90
   0  -4  -8  434.76   12.10
   0  -4  -8  436.66   12.50
   0   4   7   38.30    4.80
   0   4   7   39.70    4.90
   0   4   7   38.40    3.50
   0   4   7   31.10    3.10
   0  -4  -7   32.30    3.40
   0  -4  -7   35.40    3.30
   0  -4  -7   43.30    4.80
   0   4   6  134.69    8.80
   0   4   6  137.19    7.60
   0   4   6  125.99    5.70
   0   4   6  133.69    5.50
   0  -4  -6  124.49    5.50
   0   4   5   -3.10    2.00
   0   4   5    1.50    2.20
   0   4   5    5.10    3.10
   0  -4  -5   -1.30    2.20
   0  -4  -5    0.50    1.90
   0  -4  -5    0.30    3.00
   0   4   4  522.45   13.60
   0   4   4  493.05   13.60
   0   4   4  564.64   17.30
   0  -4  -4  575.84   17.50
   0  -4  -4  529.85   13.60
   0   4   3   87.89    4.90
   0   4   3   84.99    4.10
   0   4   3   89.49    4.00
   0  -4  -3   80.79    3.90
   0  -4  -3   87.59    4.10
   0  -4  -3   88.19    5.30
   0   4   2   79.89    3.80
   0   4   2   73.49    4.40
   0   4   2   81.39    4.00
   0   4   2   87.79    6.00
   0  -4  -2   95.09    5.00
   0  -4  -2   87.59    4.10
   0  -4  -2   80.39    3.80
   0   4   1    0.30    1.90
   0   4   1   -8.30    3.50
   0   4   1    3.10    1.90
   0  -4  -1    1.40    1.90
   0  -4  -1   -9.30    3.00
   0  -4  -1    2.80    2.00
   0   4   0 2040.90   48.70
   0   4   0 2047.10   55.39
   0   4   0 2127.29   48.70
   0  -4   0 2103.19   48.70
   0  -4   0 2061.29   48.70
   0  -4   0 2059.09   55.39
   0   4  -1    2.90    2.10
   0   4  -1    9.00    2.20
   0   4  -1   -7.10    3.70
   0  -4   1   -9.40    3.40
   0  -4   1    2.60    2.10
   0  -4   1    2.10    2.20
   0   4  -2   81.19    4.70
   0  -4   2   92.79    4.80
   0  -4   2   88.19    5.60
   0   4  -3   90.19    5.00
   0   4  -3   94.39    5.10
   0  -4   3  101.19    5.00
   0  -4   3   92.49    4.90
   0   4  -4  547.95   17.70
   0   4  -4  556.34   14.60
   0  -4   4  558.84   14.70
   0  -4   4  562.24   14.70
   0   4  -5    0.60    2.80
   0   4  -5   -3.80    3.00
   0  -4   5    0.80    2.50
   0  -4   5   -3.40    2.70
   0   4  -6  129.29    6.50
   0   4  -6  133.69    7.30
   0   4  -6  123.69    6.00
   0  -4   6  124.49    6.40
   0  -4   6  120.59    7.20
   0   4  -7   38.90    4.70
   0   4  -7   33.80    5.00
   0   4  -7   39.20    3.60
   0   4  -7   38.60    4.00
   0  -4   7   41.20    4.00
   0  -4   7   39.40    3.80
   0  -4   7   33.30    4.50
   0   4  -8  439.46   12.90
   0   4  -8  428.56   13.10
   0   4  -8  420.66   15.80
   0  -4   8  403.26   15.70
   0  -4   8  435.06   13.10
   0  -4   8  437.16   12.90
   0   4  -9    3.30    3.30
   0   4  -9    0.80    3.80
   0   4  -9   -7.60    4.00
   0  -4   9    4.90    4.00
   0  -4   9   -2.30    3.30
   0  -4   9   -4.90    4.40
   0   4 -10    2.60    4.30
   0   4 -10    2.90    3.50
   0   4 -10   -2.20    4.40
   0  -4  10    0.50    4.40
   0  -4  10   -3.00    4.90
   0  -4  10   -0.60    3.60
   0   4 -11   15.90    5.30
   0   4 -11   18.70    4.80
   0   4 -11   16.40    4.20
   0  -4  11   12.40    5.90
   0  -4  11   22.40    5.00
   0   4 -12  310.77   12.40
   0   4 -12  311.87   12.10
   0  -4  12  308.07   15.10
   0  -4  12  308.47   12.60
   0   4 -13   -8.30    5.60
   0  -4  13    0.30    5.70
   0   4 -14   10.50    6.20
   0  -4  14    8.90    6.30
   0   4 -15   -3.60    6.30
   0  -4  15    2.70    6.60
   0   4 -16  224.78   13.00
   0  -4  16  237.28   13.20
   0   4 -17    1.50    7.70
   0  -4  17    8.90    7.70
   0   4 -18   10.50    8.20
   0  -4  18   13.60    8.30
   0   4 -19   -4.40    8.50
   0  -4  19   -4.50    8.60
   0   4 -20   27.80    9.80
   0  -4  20   28.20    9.60
   0  -5 -20   15.80    9.20
   0   5  19   -0.60   11.80
   0  -5 -19   22.30    8.80
   0   5  18   -3.90   10.90
   0  -5 -18   -7.30    7.60
   0   5  17   43.60   11.20
   0   5  17   39.30    7.60
   0  -5 -17   55.99    8.10
   0   5  16    0.50    6.40
   0   5  16   11.10    9.50
   0  -5 -16    7.70    6.70
   0   5  15  105.19   11.30
   0   5  15  132.79   10.20
   0  -5 -15  118.59    8.60
   0  -5 -15  139.59   10.50
   0   5  14  -12.50    8.00
   0   5  14    1.50    5.60
   0  -5 -14   -7.50    4.10
   0  -5 -14   -0.50    5.70
   0   5  13  216.28   14.60
   0   5  13  254.37   11.30
   0  -5 -13  258.07   11.30
   0   5  12    4.50    6.70
   0   5  12    2.30    4.70
   0  -5 -12    6.20    4.70
   0  -5 -12    6.30    3.60
   0   5  11  230.28    9.60
   0   5  11  214.78   12.70
   0  -5 -11  217.48    8.90
   0  -5 -11  232.08    9.70
   0   5  10    2.80    5.40
   0   5  10    4.10    3.10
   0   5  10   -0.10    3.70
   0  -5 -10    3.70    3.40
   0  -5 -10   -3.80    5.00
   0  -5 -10    4.50    3.80
   0   5   9   41.70    5.70
   0   5   9   43.60    6.00
   0   5   9   50.99    4.30
   0   5   9   57.49    5.20
   0  -5  -9   60.99    5.30
   0  -5  -9   44.70    4.20
   0  -5  -9   41.30    5.80
   0   5   8    2.20    2.70
   0   5   8   -1.20    3.10
   0   5   8    4.40    4.80
   0   5   8   -4.50    4.30
   0  -5  -8   -4.30    2.90
   0  -5  -8   -6.90    4.30
   0  -5  -8   -1.10    2.90
   0   5   7  275.67    8.70
   0   5   7  262.57   11.20
   0   5   7  262.67    8.30
   0   5   7  239.38   14.20
   0  -5  -7  269.17    8.40
   0  -5  -7  269.87   11.30
   0   5   6   28.90    4.10
   0   5   6   20.50    2.90
   0   5   6   21.90    2.70
   0  -5  -6   19.80    2.80
   0   5   5  132.89    5.30
   0   5   5  146.19    7.00
   0   5   5  126.99    5.40
   0  -5  -5  143.69    7.20
   0  -5  -5  131.39    5.40
   0   5   4    3.10    2.70
   0   5   4    2.20    2.00
   0   5   4    1.90    2.20
   0  -5  -4    3.30    3.00
   0  -5  -4    0.60    2.00
   0  -5  -4    1.20    2.10
   0   5   3  818.62   20.80
   0   5   3  860.51   26.10
   0  -5  -3  929.01   26.30
   0  -5  -3  817.02   20.80
   0   5   2   88.29    4.10
   0   5   2   88.39    6.40
   0   5   2   77.79    4.50
   0   5   2   85.69    4.00
   0  -5  -2   80.89    4.10
   0  -5  -2   93.49    4.30
   0   5   1  148.79    7.30
   0   5   1  138.79    5.10
   0   5   1  144.59    5.10
   0  -5  -1  139.79    5.10
   0  -5  -1  138.49    5.00
   0   5   0   -2.30    2.10
   0   5   0    1.10    2.10
   0   5   0   -0.50    3.40
   0  -5   0   -3.10    2.50
   0  -5   0   -2.40    2.10
   0  -5   0   -2.40    2.10
   0   5  -1  144.89    7.30
   0   5  -1  154.38    5.40
   0   5  -1  140.69    5.40
   0  -5   1  140.89    5.50
   0  -5   1  134.59    5.40
   0  -5   1  121.09    6.10
   0   5  -2   88.99    4.50
   0   5  -2   98.29    4.80
   0  -5   2   90.69    4.90
   0  -5   2   89.19    4.70
   0   5  -3  863.41   21.80
   0   5  -3  885.21   26.50
   0  -5   3  885.51   21.90
   0  -5   3  875.21   21.80
   0   5  -4   -1.10    1.50
   0   5  -4    2.30    2.70
   0   5  -4    0.70    2.70
   0  -5   4    1.80    2.70
   0  -5   4    2.10    2.50
   0   5  -5  139.99    7.00
   0   5  -5  153.58    6.70
   0   5  -5  143.49    6.20
   0  -5   5  138.79    6.60
   0   5  -6   25.80    4.00
   0   5  -6   21.90    3.40
   0   5  -6   24.70    3.70
   0  -5   6   24.60    3.60
   0  -5   6   26.60    3.50
   0   5  -7  280.37   11.40
   0   5  -7  290.37   10.10
   0  -5   7  274.67    9.70
   0  -5   7  276.37    9.80
   0   5  -8   -2.30    4.90
   0   5  -8   -0.30    3.70
   0   5  -8    0.50    4.10
   0  -5   8    4.10    3.80
   0  -5   8    0.60    3.40
   0   5  -9   51.19    4.60
   0   5  -9   49.80    4.90
   0   5  -9   49.60    5.50
   0  -5   9   48.20    4.70
   0  -5   9   50.29    4.90
   0   5 -10   -1.90    4.30
   0   5 -10    2.10    3.60
   0   5 -10   -8.80    4.40
   0  -5  10    1.80    4.40
   0  -5  10   -4.10    3.70
   0   5 -11  221.18   10.40
   0   5 -11  199.68   11.80
   0   5 -11  231.48   10.10
   0  -5  11  221.38   10.50
   0   5 -12   12.00    5.40
   0  -5  12   14.00    5.40
   0   5 -13  228.88   11.90
   0  -5  13  241.88   12.00
   0   5 -14   -0.50    6.30
   0  -5  14    0.80    6.20
   0   5 -15  127.69   11.10
   0  -5  15  102.89    8.80
   0   5 -16   12.40    7.20
   0  -5  16    0.40    7.30
   0   5 -17   56.19    8.70
   0  -5  17   38.10    8.50
   0   5 -18  -10.90    8.00
   0  -5  18   -1.20    8.20
   0   5 -19   12.40    8.90
   0  -5  19    6.20    8.80
   0   5 -20    2.20    9.30
   0  -5  20   13.00    9.60
   0   6  19   -5.90   11.80
   0  -6 -19    0.10    9.00
   0   6  18   -9.80   10.80
   0  -6 -18   12.60    8.30
   0   6  17   -2.70   10.40
   0  -6 -17   -0.50    7.30
   0   6  16    5.60    9.70
   0   6  16    5.70    6.40
   0  -6 -16   -5.50    6.70
   0   6  15    3.50    5.90
   0   6  15    3.80    8.90
   0  -6 -15   10.70    6.40
   0   6  14   -3.90    8.20
   0   6  14   -7.30    5.40
   0  -6 -14   -1.60    5.80
   0  -6 -14   -2.10    2.50
   0   6  13   -4.60    5.00
   0   6  13  -18.20    7.40
   0  -6 -13   -4.50    3.50
   0  -6 -13   -6.00    5.30
   0   6  12   -1.30    6.90
   0   6  12   10.30    4.70
   0  -6 -12   10.50    4.00
   0  -6 -12   11.50    4.90
   0   6  11    6.90    6.40
   0   6  11    4.80    4.30
   0  -6 -11   10.00    4.50
   0  -6 -11    2.50    3.60
   0   6  10   48.30    6.60
   0   6  10   32.20    3.70
   0   6  10   41.20    4.40
   0   6  10   25.80    5.90
   0  -6 -10   43.60    4.20
   0  -6 -10   31.00    4.30
   0  -6 -10   37.30    6.20
   0   6   9    7.10    3.50
   0   6   9    2.90    2.90
   0   6   9   -3.60    4.80
   0   6   9    4.80    5.00
   0  -6  -9    2.40    3.20
   0  -6  -9    4.60    3.10
   0  -6  -9    0.90    4.80
   0   6   8  213.68   10.90
   0   6   8  223.08    7.80
   0   6   8  216.58    8.20
   0   6   8  220.98   13.70
   0  -6  -8  219.08    8.30
   0  -6  -8  222.38   10.90
   0  -6  -8  229.38    7.90
   0   6   7   28.70    4.80
   0   6   7   19.80    2.90
   0   6   7   24.20    3.20
   0  -6  -7   21.20    3.00
   0  -6  -7   15.50    3.00
   0  -6  -7   17.40    4.60
   0   6   6   35.90    3.20
   0   6   6   49.20    4.40
   0   6   6   65.59    6.10
   0  -6  -6   33.40    4.40
   0  -6  -6   49.40    4.60
   0  -6  -6   49.80    4.40
   0   6   5   19.70    2.50
   0   6   5   28.80    3.80
   0   6   5   16.30    2.80
   0  -6  -5   24.00    2.80
   0  -6  -5   22.00    3.90
   0  -6  -5   13.10    2.60
   0   6   4   24.00    2.60
   0   6   4   24.50    2.70
   0   6   4   26.50    3.40
   0  -6  -4   24.90    2.70
   0  -6  -4   34.40    3.80
   0  -6  -4   21.90    2.50
   0   6   3    9.90    2.20
   0   6   3    8.00    4.40
   0   6   3    8.20    2.80
   0   6   3   13.30    2.20
   0  -6  -3   12.10    2.30
   0  -6  -3   13.00    3.10
   0  -6  -3    8.10    2.20
   0   6   2    5.80    2.20
   0   6   2    8.50    3.70
   0   6   2    4.90    2.10
   0  -6  -2    4.60    2.20
   0  -6  -2    9.00    2.30
   0   6   1   16.50    2.40
   0   6   1   20.20    2.40
   0   6   1   18.70    4.10
   0  -6  -1   19.00    2.50
   0  -6  -1   15.20    2.50
   0   6   0  181.78    8.30
   0   6   0  181.48    6.10
   0   6   0  169.58    6.10
   0  -6   0  177.78    6.10
   0  -6   0  181.78    6.10
   0   6  -1   20.30    4.30
   0   6  -1   18.40    2.70
   0   6  -1   15.60    2.60
   0  -6   1   18.50    2.70
   0  -6   1   16.20    2.50
   0   6  -2    7.20    2.50
   0   6  -2    7.00    2.60
   0  -6   2   -0.40    2.20
   0  -6   2    3.20    2.40
   0  -6   2    8.40    2.70
   0   6  -3   16.80    3.00
   0  -6   3   19.70    3.10
   0  -6   3   13.50    2.90
   0   6  -4   30.00    3.50
   0   6  -4   30.60    3.40
   0  -6   4   33.30    3.30
   0  -6   4   29.40    3.40
   0   6  -5   22.20    3.20
   0   6  -5   22.60    3.60
   0   6  -5   21.90    3.50
   0  -6   5   21.30    3.50
   0   6  -6   48.10    4.70
   0   6  -6   44.70    4.00
   0   6  -6   50.49    4.50
   0  -6   6   46.10    4.40
   0  -6   6   48.10    4.10
   0   6  -7   21.10    4.00
   0   6  -7   12.90    3.60
   0   6  -7   16.40    4.30
   0  -6   7   17.30    3.90
   0  -6   7   19.60    4.10
   0   6  -8  223.68    9.50
   0   6  -8  206.08   10.30
   0   6  -8  217.48    9.10
   0  -6   8  231.88    9.30
   0  -6   8  222.58    9.40
   0   6  -9   -4.80    4.20
   0   6  -9    0.30    3.50
   0   6  -9   -4.50    4.20
   0   6  -9    2.00    5.50
   0  -6   9    1.20    4.40
   0  -6   9    6.90    3.90
   0   6 -10   35.60    5.60
   0   6 -10   37.40    5.40
   0   6 -10   43.30    6.70
   0   6 -10   33.00    5.10
   0  -6  10   34.80    4.80
   0  -6  10   41.00    5.50
   0   6 -11    3.70    5.40
   0   6 -11   19.00    5.40
   0  -6  11   15.90    5.30
   0   6 -12   13.00    5.60
   0  -6  12   10.90    5.90
   0   6 -13   -5.60    5.90
   0  -6  13    1.10    6.10
   0   6 -14   -3.00    6.30
   0  -6  14    0.00    6.40
   0   6 -15   16.00    7.10
   0  -6  15    2.00    7.00
   0   6 -16    5.60    7.30
   0  -6  16    0.70    7.50
   0   6 -17    3.00    7.80
   0  -6  17   -5.20    7.90
   0   6 -18   -2.40    8.40
   0  -6  18    0.80    8.40
   0   6 -19    0.50    9.10
   0  -6  19   -5.90    9.10
   0   7  19   11.00   12.20
   0  -7 -19   12.70    8.60
   0   7  18    3.30   11.60
   0  -7 -18    6.50    8.30
   0   7  17   45.80   11.50
   0  -7 -17   46.10    8.40
   0   7  16    5.00    9.90
   0  -7 -16   -0.40    7.10
   0   7  15   28.90    6.50
   0   7  15   43.40   10.00
   0  -7 -15   46.40    7.30
   0   7  14    0.70    8.40
   0   7  14   -6.00    5.60
   0  -7 -14   -4.60    5.90
   0  -7 -14   -3.30    3.20
   0   7  13   21.10    8.30
   0   7  13    9.20    5.30
   0  -7 -13   16.90    5.70
   0  -7 -13   16.80    4.20
   0   7  12  -10.70    6.10
   0   7  12    4.30    7.30
   0   7  12    4.90    4.80
   0  -7 -12   -0.30    3.90
   0  -7 -12   -1.90    4.80
   0   7  11  121.29   10.80
   0   7  11   83.79   11.20
   0   7  11  115.59    7.90
   0  -7 -11  107.19    7.00
   0  -7 -11  105.09    7.90
   0   7  10   30.20    4.50
   0   7  10   21.10    6.30
   0   7  10   45.10    6.60
   0   7  10   28.70    3.80
   0  -7 -10   28.50    4.60
   0  -7 -10   36.60    6.10
   0  -7 -10   32.50    4.00
   0   7   9  242.58   11.70
   0   7   9  226.68    8.90
   0   7   9  238.58   14.70
   0   7   9  220.68    8.30
   0  -7  -9  230.98   11.70
   0  -7  -9  233.48    9.10
   0  -7  -9  229.58    8.40
   0   7   8   18.10    5.00
   0   7   8    6.10    4.70
   0   7   8   11.30    3.40
   0   7   8    7.50    2.90
   0  -7  -8    5.60    3.10
   0  -7  -8   10.70    4.70
   0  -7  -8    8.70    3.10
   0   7   7   37.00    4.80
   0   7   7   18.70    3.40
   0   7   7   19.30    2.80
   0  -7  -7   20.50    3.10
   0  -7  -7   25.30    4.80
   0  -7  -7   19.70    3.40
   0   7   6    9.60    3.90
   0   7   6    5.00    2.90
   0   7   6    6.70    2.50
   0  -7  -6    5.60    4.00
   0  -7  -6    8.50    2.80
   0  -7  -6    2.50    2.90
   0   7   5  171.98    6.40
   0   7   5  160.18    7.90
   0   7   5  171.28    6.30
   0  -7  -5  160.98    6.30
   0   7   4   17.00    4.70
   0   7   4   14.70    2.70
   0   7   4   20.10    2.70
   0   7   4   12.60    3.40
   0  -7  -4   19.80    2.90
   0  -7  -4   22.40    2.70
   0  -7  -4   19.70    3.60
   0   7   3   17.60    2.70
   0   7   3   19.60    2.60
   0   7   3    8.60    3.10
   0   7   3   15.40    4.80
   0  -7  -3   19.40    2.90
   0  -7  -3   19.10    2.50
   0   7   2    2.30    2.20
   0   7   2   -0.30    2.30
   0   7   2    2.60    4.00
   0  -7  -2   -1.50    2.50
   0  -7  -2    1.50    2.30
   0   7   1  271.87   10.80
   0   7   1  263.37    8.20
   0   7   1  274.77    8.10
   0  -7  -1  270.77    8.20
   0  -7  -1  267.47    8.20
   0   7   0    3.50    2.50
   0   7   0    2.00    4.10
   0   7   0    0.40    2.40
   0  -7   0   -0.40    2.50
   0  -7   0   -2.50    3.00
   0  -7   0   -0.20    2.30
   0   7  -1  271.17    8.50
   0   7  -1  273.07    8.50
   0   7  -1  264.47   10.80
   0  -7   1  272.47   10.30
   0  -7   1  269.07    8.40
   0  -7   1  285.17    8.70
   0   7  -2    2.80    2.60
   0   7  -2    4.80    2.80
   0  -7   2    2.10    2.80
   0  -7   2   -0.60    2.50
   0  -7   2    0.60    3.60
   0   7  -3   20.60    3.30
   0   7  -3   18.20    3.00
   0  -7   3   20.20    3.20
   0  -7   3   20.20    4.10
   0  -7   3   12.00    3.20
   0   7  -4   10.70    3.50
   0  -7   4   18.40    3.60
   0  -7   4   20.00    3.30
   0  -7   4   22.00    4.20
   0   7  -5  179.28    7.60
   0   7  -5  146.39    6.60
   0   7  -5  182.48    7.80
   0  -7   5  183.98    7.70
   0   7  -6    9.80    3.80
   0   7  -6    1.50    3.60
   0   7  -6    7.20    3.30
   0  -7   6    8.80    3.80
   0  -7   6    4.30    3.40
   0   7  -7   23.20    4.30
   0   7  -7   22.80    3.70
   0   7  -7   16.50    4.30
   0  -7   7   15.80    4.20
   0  -7   7   18.80    4.10
   0   7  -8    8.20    4.30
   0   7  -8   13.10    3.60
   0   7  -8    9.00    4.20
   0  -7   8    3.40    4.40
   0  -7   8    8.40    3.90
   0   7  -9  220.38   14.80
   0   7  -9  230.28   11.10
   0   7  -9  231.08   10.30
   0  -7   9  238.58    9.90
   0  -7   9  218.98   10.20
   0   7 -10   21.10    5.50
   0   7 -10   15.60    7.00
   0   7 -10   34.00    5.60
   0  -7  10   32.90    5.60
   0   7 -11  112.89   12.10
   0   7 -11  117.79    9.40
   0   7 -11  120.89    9.90
   0  -7  11  115.89    9.40
   0   7 -12   11.70    6.00
   0  -7  12    4.50    6.00
   0   7 -13   11.30    6.30
   0  -7  13    8.10    6.40
   0   7 -14    2.20    6.80
   0  -7  14   -3.90    6.60
   0   7 -15   40.90    7.90
   0  -7  15   35.70    7.80
   0   7 -16    2.60    7.60
   0  -7  16   12.50    7.70
   0   7 -17   31.30    8.70
   0  -7  17   32.10    8.90
   0   7 -18   -8.00    8.50
   0  -7  18  -29.20    8.50
   0   7 -19   -6.10    8.90
   0  -7  19   10.30    9.50
   0   8  19   -2.90   12.20
   0  -8 -19    3.00    8.90
   0   8  18    1.40   11.30
   0  -8 -18   -0.60    8.50
   0   8  17   13.60   10.80
   0  -8 -17    0.00    7.70
   0   8  16  150.58   16.20
   0  -8 -16  198.38   12.60
   0   8  15   43.90   10.20
   0   8  15   34.60    7.10
   0  -8 -15   35.90    7.40
   0   8  14   28.90    6.20
   0   8  14   37.40    9.50
   0  -8 -14   31.80    6.80
   0   8  13   18.50    7.60
   0   8  13   46.50    9.00
   0   8  13   30.50    5.80
   0  -8 -13   47.90    6.60
   0  -8 -13   30.30    5.00
   0   8  12  238.48   10.60
   0   8  12  260.37   14.40
   0   8  12  206.58   15.90
   0  -8 -12  228.08    9.70
   0  -8 -12  257.17   11.20
   0   8  11   51.19    5.40
   0   8  11   33.20    7.60
   0   8  11   70.79    8.20
   0  -8 -11   47.20    4.70
   0  -8 -11   42.40    5.60
   0   8  10    1.50    4.10
   0   8  10    7.90    6.10
   0   8  10   14.50    6.10
   0  -8 -10    9.10    6.00
   0  -8 -10    4.90    3.60
   0  -8 -10    5.80    4.40
   0   8   9    0.20    3.00
   0   8   9   -1.60    3.60
   0   8   9   11.00    5.30
   0   8   9   -2.40    5.00
   0  -8  -9    4.30    4.00
   0  -8  -9   -1.00    3.20
   0  -8  -9    1.40    5.10
   0   8   8  262.97   11.40
   0   8   8  220.78    8.50
   0   8   8  209.98    8.00
   0  -8  -8  217.38   11.40
   0  -8  -8  220.78    8.60
   0  -8  -8  235.28    8.20
   0   8   7   16.40    3.40
   0   8   7   13.00    2.90
   0   8   7   22.60    4.80
   0  -8  -7   20.40    4.90
   0  -8  -7   18.90    3.20
   0  -8  -7   11.60    3.40
   0   8   6    5.50    2.60
   0   8   6    5.50    4.00
   0   8   6    9.50    3.00
   0  -8  -6    9.30    2.90
   0  -8  -6    5.90    4.20
   0  -8  -6    8.70    3.00
   0   8   5   48.80    4.60
   0   8   5   38.00    3.30
   0   8   5   46.00    3.50
   0   8   5   50.49    6.10
   0  -8  -5   40.30    3.40
   0  -8  -5   45.60    3.60
   0   8   4  565.04   15.00
   0   8   4  563.84   14.80
   0   8   4  551.44   18.40
   0   8   4  583.04   18.70
   0  -8  -4  587.04   15.10
   0  -8  -4  563.04   14.90
   0   8   3   33.30    5.30
   0   8   3   28.90    3.10
   0   8   3   31.50    3.10
   0  -8  -3   27.90    3.30
   0  -8  -3   29.20    3.20
   0   8   2   -1.20    2.60
   0   8   2    3.20    4.60
   0   8   2   -3.80    2.60
   0  -8  -2   -4.50    2.80
   0  -8  -2   -6.70    2.90
   0   8   1  140.19    6.00
   0   8   1  152.58    8.70
   0   8   1  137.59    6.00
   0  -8  -1  133.19    6.10
   0  -8  -1  133.69    6.10
   0  -8  -1  130.89    8.30
   0   8   0 1117.89   27.80
   0   8   0 1111.69   27.70
   0   8   0 1147.99   32.50
   0  -8   0 1130.39   32.40
   0  -8   0 1152.98   27.80
   0  -8   0 1130.99   27.80
   0   8  -1  148.99    9.10
   0   8  -1  157.88    6.50
   0   8  -1  147.59    6.40
   0  -8   1  149.29    8.60
   0  -8   1  150.38    6.50
   0  -8   1  138.09    6.50
   0   8  -2    0.30    3.10
   0   8  -2    0.60    2.90
   0  -8   2   -5.10    4.20
   0  -8   2   -4.10    2.80
   0  -8   2    1.80    3.00
   0   8  -3   28.30    3.40
   0   8  -3   34.20    3.90
   0  -8   3   40.60    3.70
   0  -8   3   26.60    3.70
   0  -8   3   29.40    4.80
   0   8  -4  630.84   16.80
   0   8  -4  608.94   16.40
   0  -8   4  588.34   16.60
   0  -8   4  597.94   19.10
   0   8  -5   55.39    4.60
   0  -8   5   46.00    5.20
   0  -8   5   55.29    4.50
   0  -8   5   52.89    4.30
   0   8  -6    7.60    3.10
   0   8  -6    5.90    4.00
   0   8  -6    5.10    3.60
   0  -8   6    4.70    3.70
   0  -8   6    5.90    4.00
   0   8  -7   12.70    3.70
   0   8  -7   20.60    4.20
   0   8  -7   13.40    4.50
   0  -8   7   18.20    4.10
   0  -8   7   15.80    4.40
   0   8  -8  224.98   10.10
   0   8  -8  217.38   10.50
   0  -8   8  219.58   10.00
   0  -8   8  224.38    9.90
   0   8  -9   -1.30    4.70
   0   8  -9    0.00    4.30
   0  -8   9   -3.10    4.90
   0  -8   9   -1.40    4.10
   0   8 -10    2.40    5.20
   0   8 -10    8.80    5.20
   0   8 -10    0.10    7.10
   0  -8  10    6.80    5.50
   0   8 -11   50.79    6.80
   0   8 -11   50.79    6.50
   0   8 -11   48.80    8.70
   0  -8  11   49.90    6.50
   0   8 -12  230.08   12.00
   0   8 -12  189.78   16.20
   0  -8  12  235.48   12.20
   0   8 -13   38.20    7.20
   0  -8  13   38.50    7.40
   0   8 -14   36.40    7.60
   0  -8  14   32.40    7.60
   0   8 -15   42.60    8.10
   0  -8  15   41.30    8.20
   0   8 -16  171.88   13.20
   0  -8  16  178.78   13.40
   0   8 -17    7.90    8.20
   0  -8  17    2.40    8.50
   0   8 -18    0.70    8.60
   0  -8  18    1.90    9.00
   0   8 -19   -4.80    9.10
   0  -8  19    2.30    9.50
   0   9  18    1.30   11.60
   0  -9 -18    1.20    8.50
   0   9  17   -6.00   10.30
   0  -9 -17    1.70    7.80
   0   9  16    8.70   10.20
   0  -9 -16    4.40    7.60
   0   9  15   27.60    9.90
   0  -9 -15   16.80    7.50
   0   9  14    4.80    5.90
   0   9  14   13.30    9.00
   0  -9 -14    6.60    6.80
   0   9  13  131.39   13.20
   0   9  13  106.79    9.20
   0  -9 -13  123.09    9.80
   0   9  12    1.00    5.00
   0   9  12   -4.90    7.10
   0   9  12   13.90    7.80
   0  -9 -12   12.00    5.60
   0  -9 -12    2.30    4.20
   0   9  11    3.40    7.00
   0   9  11   -0.50    4.50
   0   9  11    0.50    6.50
   0  -9 -11    4.20    5.10
   0  -9 -11    6.10    3.90
   0   9  10    4.40    4.20
   0   9  10    3.50    6.60
   0   9  10   25.10    6.50
   0  -9 -10    1.60    3.60
   0  -9 -10    3.60    4.70
   0   9   9    9.30    5.80
   0   9   9    1.20    3.90
   0   9   9   18.80    5.80
   0   9   9    4.50    3.40
   0  -9  -9    7.90    5.60
   0  -9  -9    9.20    4.30
   0  -9  -9    6.30    3.50
   0   9   8    0.90    2.80
   0   9   8   -5.10    3.40
   0   9   8   10.30    5.10
   0  -9  -8    2.00    3.20
   0  -9  -8   -2.40    3.70
   0  -9  -8   -3.90    4.90
   0   9   7   70.29    7.30
   0   9   7   57.19    5.40
   0   9   7   61.39    5.00
   0  -9  -7   42.00    4.00
   0  -9  -7   58.49    5.20
   0  -9  -7   51.89    5.90
   0   9   6   49.30    5.10
   0   9   6   55.89    6.50
   0   9   6   43.00    3.60
   0   9   6   35.80    3.30
   0  -9  -6   37.20    5.10
   0  -9  -6   39.20    3.60
   0  -9  -6   41.10    3.90
   0   9   5  278.97    8.80
   0   9   5  275.57    8.90
   0   9   5  285.77   12.60
   0   9   5  263.27   10.80
   0  -9  -5  274.37    9.00
   0  -9  -5  275.07    8.80
   0   9   4   11.20    3.10
   0   9   4   -1.80    3.60
   0   9   4    9.10    2.80
   0   9   4   19.60    5.50
   0  -9  -4    9.20    3.10
   0  -9  -4    7.80    3.20
   0   9   3  378.36   10.80
   0   9   3  376.26   11.00
   0   9   3  376.56   14.30
   0  -9  -3  385.56   10.90
   0  -9  -3  360.16   11.00
   0   9   2   15.50    3.00
   0   9   2   12.50    3.20
   0   9   2   22.70    5.50
   0  -9  -2   21.50    3.40
   0  -9  -2   16.50    3.20
   0   9   1  286.37    9.10
   0   9   1  284.17    9.10
   0   9   1  293.97   12.30
   0  -9  -1  292.47    9.30
   0  -9  -1  280.87    9.20
   0  -9  -1  302.17   11.80
   0   9   0    8.80    5.30
   0   9   0    6.80    3.00
   0   9   0    2.70    2.80
   0  -9   0    3.20    4.30
   0  -9   0    3.20    2.90
   0  -9   0    9.80    3.20
   0   9  -1  309.47    9.50
   0   9  -1  287.57   12.40
   0   9  -1  293.17    9.50
   0  -9   1  302.87    9.70
   0  -9   1  279.27    9.60
   0  -9   1  294.77   12.00
   0   9  -2   15.10    3.20
   0   9  -2   19.70    3.60
   0  -9   2   17.20    4.70
   0  -9   2   13.00    3.50
   0  -9   2   11.40    3.30
   0   9  -3  388.66   12.20
   0   9  -3  375.86   11.80
   0  -9   3  403.66   12.20
   0  -9   3  403.66   12.10
   0  -9   3  407.16   14.40
   0   9  -4   10.80    4.00
   0   9  -4   12.10    3.20
   0  -9   4   10.90    4.00
   0  -9   4   10.70    4.50
   0  -9   4    1.90    2.30
   0   9  -5  258.67    9.30
   0   9  -5  288.07   10.30
   0  -9   5  279.07   10.30
   0  -9   5  306.67   10.20
   0  -9   5  264.27   11.60
   0   9  -6   57.99    5.90
   0   9  -6   45.10    5.10
   0  -9   6   53.19    4.90
   0  -9   6   38.80    5.50
   0  -9   6   47.00    5.10
   0   9  -7   63.59    6.50
   0   9  -7   51.09    5.60
   0  -9   7   46.50    5.40
   0  -9   7   48.30    5.00
   0   9  -8   -8.60    4.10
   0   9  -8   -4.50    4.80
   0  -9   8    0.30    4.70
   0  -9   8   -3.60    4.30
   0   9  -9    5.90    4.90
   0   9  -9    2.80    5.40
   0  -9   9    1.70    5.20
   0  -9   9   -0.20    4.60
   0   9 -10    8.20    5.80
   0   9 -10  -11.50    5.30
   0  -9  10    3.20    5.60
   0   9 -11    5.00    6.00
   0   9 -11    1.90    7.80
   0   9 -11   -7.80    5.70
   0  -9  11   -0.50    6.10
   0   9 -12   10.70    8.30
   0   9 -12    2.50    6.70
   0  -9  12    7.20    6.60
   0   9 -13   98.29   14.00
   0   9 -13  103.89    8.80
   0  -9  13  122.19   11.40
   0   9 -14    9.00    7.10
   0  -9  14    1.20    7.40
   0   9 -15   25.70    8.20
   0  -9  15   26.80    8.30
   0   9 -16   13.70    8.20
   0  -9  16   -0.60    8.10
   0   9 -17   -1.60    8.30
   0  -9  17   -6.20    8.40
   0   9 -18   -8.40    8.80
   0  -9  18    0.40    9.20
   0  10  18    2.00   11.90
   0 -10 -18  -12.70    8.90
   0  10  17    3.50   11.00
   0 -10 -17    0.30    8.00
   0  10  16   27.60   10.60
   0 -10 -16   14.10    7.60
   0  10  15    4.00    9.70
   0 -10 -15   -0.20    7.00
   0  10  14   12.50    9.10
   0 -10 -14   -6.50    6.70
   0  10  13   16.40    8.60
   0  10  13    0.60    5.50
   0 -10 -13    8.00    6.40
   0  10  12    0.60    4.90
   0  10  12   14.90    8.00
   0 -10 -12   -0.10    5.70
   0  10  11    3.50    4.70
   0  10  11    8.10    7.10
   0 -10 -11    4.40    5.30
   0 -10 -11    1.90    3.90
   0  10  10    3.40    6.70
   0  10  10   -3.70    4.20
   0 -10 -10    1.90    3.70
   0 -10 -10   -4.80    4.60
   0  10   9   21.10    6.10
   0  10   9    1.90    3.90
   0 -10  -9   -4.50    4.30
   0 -10  -9   -1.90    3.50
   0 -10  -9   -7.70    5.50
   0  10   8   74.39    5.90
   0  10   8   77.29    8.50
   0  10   8   64.59    6.10
   0 -10  -8   79.89    8.70
   0 -10  -8   69.89    6.00
   0 -10  -8   70.69    6.40
   0  10   7  -10.70    4.70
   0  10   7    1.50    3.40
   0  10   7   -4.50    2.90
   0  10   7    1.00    6.20
   0 -10  -7    0.80    3.60
   0 -10  -7   -2.30    4.50
   0 -10  -7   -1.00    3.30
   0  10   6    5.10    6.10
   0  10   6   -8.00    4.20
   0  10   6    1.30    3.30
   0  10   6    1.70    3.00
   0  10   5    5.40    6.10
   0  10   5   -5.00    3.90
   0  10   5    5.20    3.20
   0  10   5    5.90    3.00
   0 -10  -5    0.40    3.30
   0  10   4   -0.50    2.80
   0  10   4   -0.60    5.40
   0  10   4    2.00    3.10
   0 -10  -4   -0.20    3.20
   0 -10  -4    0.50    3.30
   0  10   3   16.90    6.10
   0  10   3   11.90    3.00
   0  10   3   14.50    3.30
   0 -10  -3   21.40    3.60
   0 -10  -3   13.20    3.40
   0  10   2   16.70    3.40
   0  10   2   21.50    5.90
   0  10   2   10.50    3.20
   0 -10  -2   13.70    3.50
   0 -10  -2   12.70    3.60
   0  10   1    9.70    5.60
   0  10   1   10.50    3.10
   0  10   1   10.20    3.30
   0 -10  -1    8.90    3.00
   0 -10  -1   13.50    3.30
   0 -10  -1    6.00    4.50
   0  10   0    1.50    3.30
   0  10   0   -1.90    3.10
   0  10   0    0.70    5.60
   0 -10   0    0.90    3.10
   0 -10   0   -0.40    3.30
   0 -10   0    2.60    4.70
   0  10  -1   11.50    5.70
   0  10  -1   11.90    3.60
   0  10  -1    6.90    3.20
   0 -10   1   14.50    3.40
   0 -10   1    7.80    4.80
   0 -10   1    5.40    3.40
   0  10  -2   14.30    3.40
   0  10  -2   17.10    3.80
   0 -10   2   10.60    3.40
   0 -10   2   16.40    5.00
   0  10  -3   16.30    4.10
   0  10  -3   15.80    3.60
   0 -10   3    4.50    3.20
   0 -10   3   15.30    5.20
   0 -10   3   16.20    4.10
   0  10  -4   -1.00    4.00
   0  10  -4    4.40    3.40
   0 -10   4   -3.70    4.60
   0 -10   4    1.70    3.20
   0 -10   4   -1.40    4.00
   0  10  -5   -1.30    4.30
   0 -10   5   -5.00    4.10
   0 -10   5   -6.60    3.70
   0  10  -6   -0.30    4.50
   0 -10   6    3.50    4.50
   0 -10   6   -2.50    4.00
   0  10  -7  -14.10    4.80
   0 -10   7   -1.30    4.30
   0 -10   7   -8.10    4.70
   0  10  -8   74.29    6.50
   0  10  -8   72.39    7.50
   0 -10   8   66.09    6.00
   0 -10   8   65.79    6.40
   0  10  -9   -4.70    5.00
   0  10  -9   -1.20    5.40
   0 -10   9    2.60    5.60
   0  10 -10    1.40    5.20
   0  10 -10   -4.60    5.80
   0 -10  10    5.40    6.00
   0  10 -11   -2.70    6.40
   0  10 -11   -8.40    5.70
   0  10 -11    2.50    8.80
   0 -10  11   -1.00    6.40
   0  10 -12    1.90    6.80
   0  10 -12    2.80    8.70
   0 -10  12    1.80    6.90
   0  10 -13   -3.90    9.10
   0  10 -13    5.30    7.30
   0 -10  13   -5.40    7.20
   0  10 -14    0.50    7.60
   0  10 -14    0.70    9.10
   0 -10  14    2.00    7.70
   0  10 -15    1.50    8.00
   0 -10  15   -2.50    8.00
   0  10 -16    7.30    8.70
   0 -10  16    1.60    8.70
   0  10 -17    2.10    8.90
   0 -10  17   -4.40    8.90
   0  10 -18   -3.10    9.10
   0 -10  18    1.20    9.50
   0  11  17   36.80   11.90
   0 -11 -17   38.80    8.60
   0  11  16   10.40   10.30
   0 -11 -16   -1.60    7.40
   0  11  15   60.19   10.90
   0 -11 -15   55.09    7.80
   0  11  14   47.00    9.90
   0 -11 -14   35.80    7.10
   0  11  13  199.28   14.80
   0 -11 -13  187.98   10.90
   0  11  12   15.30    8.20
   0 -11 -12   -3.10    5.80
   0  11  11  119.19   11.40
   0  11  11   72.99    6.00
   0 -11 -11   91.49    8.30
   0  11  10   11.70    4.50
   0  11  10   31.80    7.30
   0 -11 -10   17.60    4.20
   0 -11 -10   21.70    5.00
   0  11   9   40.80    7.00
   0  11   9   39.90    8.30
   0  11   9   35.90    4.60
   0 -11  -9   26.70    4.10
   0 -11  -9   36.70    6.40
   0  11   8   16.10    7.40
   0  11   8   15.90    5.80
   0  11   8   12.60    3.90
   0  11   7  265.07   11.80
   0  11   7  256.27   13.80
   0  11   7  242.58    9.10
   0 -11  -7  263.77    9.20
   0  11   6   50.79    7.70
   0  11   6   59.29    5.70
   0  11   6   43.60    4.00
   0  11   6   38.10    5.60
   0  11   5   99.29    6.30
   0  11   5  106.69   10.40
   0  11   5  101.09    6.30
   0 -11  -5  116.39    6.60
   0 -11  -5  106.09    6.60
   0  11   4    4.00    3.30
   0  11   4    5.70    3.50
   0  11   4    1.50    6.20
   0 -11  -4    1.00    3.60
   0 -11  -4    2.70    3.60
   0  11   3   -2.30    3.40
   0  11   3   -2.00    3.10
   0  11   3    1.50    6.20
   0 -11  -3    5.10    3.60
   0 -11  -3   -5.40    3.50
   0  11   2   -3.70    3.20
   0  11   2    0.60    5.90
   0  11   2   -3.40    3.40
   0 -11  -2   -3.90    3.50
   0 -11  -2  -11.10    3.60
   0  11   1   32.90    6.50
   0  11   1   26.40    3.90
   0  11   1   27.50    3.70
   0 -11  -1   24.20    3.60
   0 -11  -1   30.00    4.00
   0  11   0   -2.10    3.20
   0  11   0   -2.20    3.50
   0  11   0    0.50    6.00
   0 -11   0   -2.40    3.60
   0 -11   0   -1.90    3.20
   0  11  -1   30.80    3.80
   0  11  -1   29.60    4.20
   0  11  -1   33.90    6.60
   0 -11   1   30.20    4.10
   0 -11   1   29.50    3.90
   0  11  -2   -0.50    3.50
   0  11  -2    6.10    4.10
   0 -11   2    0.30    3.50
   0  11  -3    3.00    4.10
   0 -11   3    5.10    4.30
   0 -11   3   -1.00    2.40
   0  11  -4    3.20    4.50
   0 -11   4   -6.00    3.80
   0 -11   4    2.20    4.40
   0  11  -5  100.59    8.10
   0 -11   5  100.89    8.00
   0 -11   5  107.19    7.70
   0  11  -6   68.59    6.20
   0 -11   6   52.89    5.50
   0 -11   6   56.89    5.90
   0  11  -7  284.67   12.10
   0 -11   7  283.07   11.50
   0 -11   7  255.77   11.60
   0  11  -8   11.40    4.70
   0  11  -8   10.10    5.90
   0 -11   8    7.60    5.10
   0 -11   8    9.20    5.70
   0  11  -9   27.60    6.60
   0  11  -9   32.20    5.60
   0 -11   9   36.70    6.60
   0  11 -10    3.40    6.20
   0  11 -10    5.90    5.70
   0 -11  10   23.20    6.70
   0  11 -11   74.59    8.10
   0  11 -11   79.59    9.50
   0  11 -11   77.79   11.70
   0 -11  11   75.19    8.30
   0  11 -12    0.30    9.50
   0  11 -12    5.20    7.20
   0 -11  12   -2.80    6.90
   0  11 -13  133.79   18.00
   0  11 -13  171.78   12.70
   0 -11  13  167.38   12.90
   0  11 -14   22.20    8.40
   0  11 -14   26.10   10.70
   0 -11  14   25.70    8.40
   0  11 -15   44.10    9.10
   0  11 -15   47.00   11.40
   0 -11  15   46.90    9.10
   0  11 -16   -7.30    8.60
   0 -11  16    0.40    8.70
   0  11 -17    6.60    9.20
   0 -11  17   13.60    9.60
   0  12  16   67.09   12.30
   0 -12 -16   56.99    8.30
   0  12  15   20.50   10.10
   0 -12 -15   11.00    7.10
   0  12  14    4.60    9.30
   0 -12 -14   -1.10    6.50
   0  12  13   26.00    8.90
   0  12  12  187.38   13.90
   0  12  11   22.50    7.80
   0  12  10   -7.50    8.20
   0  12  10    7.40    7.20
   0  12   9    7.60    6.30
   0  12   9    2.30    8.00
   0  12   8   26.30    8.20
   0  12   8   20.90    6.30
   0  12   8   17.20    4.30
   0  12   7   -8.20    5.20
   0  12   7    1.70    7.50
   0  12   7    1.20    3.90
   0  12   6   11.50    7.30
   0 -12  -6   12.80    4.30
   0  12   5   15.40    4.10
   0  12   5   12.40    7.50
   0 -12  -5   14.50    4.20
   0  12   4  250.17    9.70
   0  12   4  249.58   13.90
   0  12   4  259.27    9.50
   0 -12  -4  272.47    9.60
   0 -12  -4  268.27    9.80
   0  12   3    4.60    3.50
   0  12   3    3.00    7.00
   0  12   3    1.20    3.80
   0 -12  -3   12.10    4.10
   0 -12  -3    3.50    3.90
   0  12   2   -6.30    6.60
   0  12   2    3.00    3.80
   0  12   2    1.40    3.30
   0 -12  -2    5.00    3.40
   0 -12  -2   -1.30    3.90
   0  12   1   -6.60    3.80
   0  12   1   -7.00    6.50
   0 -12  -1   -1.10    3.60
   0 -12  -1   -6.80    3.90
   0  12   0   49.60    4.70
   0  12   0   57.79    7.90
   0 -12   0   51.39    4.80
   0 -12   0   38.90    4.50
   0  12  -1   -2.20    6.50
   0  12  -1    0.30    4.10
   0 -12   1   -0.70    3.70
   0 -12   1    0.60    3.90
   0  12  -2   -4.80    4.30
   0 -12   2   -1.40    3.50
   0  12  -3   14.60    4.70
   0 -12   3    4.40    3.30
   0 -12   3    8.00    4.70
   0  12  -4  265.37   10.90
   0 -12   4  275.17   10.70
   0 -12   4  253.07   10.80
   0  12  -5   16.50    5.30
   0 -12   5   13.30    5.20
   0 -12   5   24.00    5.10
   0  12  -6    1.20    5.50
   0 -12   6   -1.00    4.80
   0 -12   6    4.40    5.50
   0  12  -7    3.30    5.90
   0 -12   7   -0.80    4.90
   0 -12   7   -2.70    5.70
   0  12  -8   23.90    6.40
   0 -12   8   18.60    5.70
   0 -12   8   15.20    6.30
   0  12  -9   -2.80    6.20
   0 -12   9   -2.70    6.20
   0  12 -10    1.50    6.70
   0  12 -10   -5.70    5.10
   0 -12  10  -10.10    6.50
   0  12 -11    9.00   10.40
   0  12 -11    5.60    7.10
   0  12 -11   10.80    5.90
   0 -12  11   11.10    7.30
   0  12 -12  151.58   12.90
   0  12 -12  183.98   18.90
   0 -12  12  164.08   12.70
   0  12 -13   14.50    8.10
   0  12 -13    5.90   10.70
   0 -12  13    4.20    8.00
   0  12 -14    0.40    8.20
   0  12 -14  -12.20   10.40
   0 -12  14   -3.80    8.20
   0  12 -15   15.10    8.60
   0 -12  15   19.20    8.80
   0  12 -16   35.40    9.70
   0 -12  16   44.20    9.70
   0  13  16    6.40   11.00
   0  13  15   17.00   10.30
   0  13  14   16.10    9.60
   0  13  13   31.30    9.40
   0  13  13    6.80   10.40
   0  13  12   24.00    8.50
   0  13  12   15.30   10.00
   0  13  11   47.60   10.30
   0  13  11   51.09    8.70
   0  13  10   12.10    9.40
   0  13  10   31.50    7.60
   0  13   9   -0.20    6.70
   0  13   9   -2.20    8.40
   0  13   8    6.20    6.10
   0  13   8    4.20    8.30
   0  13   7   -5.00    8.00
   0  13   7   -8.70    5.40
   0  13   6    5.70    7.90
   0  13   5    0.60    7.90
   0  13   5   -3.00    4.10
   0 -13  -5   -3.70    4.10
   0  13   4    2.90    4.00
   0  13   4   -3.00    7.60
   0 -13  -4    1.20    4.50
   0 -13  -4   -6.50    4.10
   0  13   3  115.89   11.90
   0  13   3  119.39    7.30
   0 -13  -3  129.79    7.80
   0 -13  -3  103.89    7.20
   0  13   2   55.89    8.90
   0  13   2   51.99    4.90
   0 -13  -2   41.90    4.70
   0 -13  -2   55.79    5.20
   0  13   1   -4.30    7.30
   0  13   1    5.30    4.20
   0 -13  -1    5.70    4.30
   0 -13  -1   -3.60    4.10
   0  13   0    1.10    7.40
   0  13   0    2.30    4.20
   0 -13   0    1.00    4.20
   0 -13   0   -5.90    4.00
   0  13  -1    4.30    4.70
   0  13  -1   -3.60    7.30
   0 -13   1    1.60    4.20
   0  13  -2   49.90    5.60
   0 -13   2   53.69    5.80
   0  13  -3  118.39    8.70
   0 -13   3   96.89    8.00
   0 -13   3  118.49    8.90
   0  13  -4   -5.20    5.10
   0 -13   4   -1.60    4.70
   0 -13   4   -6.00    5.20
   0  13  -5   -2.50    5.40
   0 -13   5   -1.40    4.90
   0 -13   5   -4.10    5.40
   0  13  -6    8.60    6.10
   0 -13   6   12.20    5.90
   0 -13   6    2.00    5.40
   0  13  -7    1.60    6.30
   0 -13   7    0.70    6.10
   0 -13   7   -5.60    5.30
   0  13  -8    7.70    6.60
   0 -13   8    3.10    6.30
   0  13  -9    5.30    6.80
   0 -13   9    3.80    6.70
   0  13 -10   17.00    7.50
   0 -13  10   14.70    7.40
   0  13 -11   47.50    8.40
   0 -13  11   36.90    8.30
   0  13 -12  -11.60    7.60
   0  13 -12    9.50   11.80
   0 -13  12    7.10    7.80
   0  13 -13   10.80   11.40
   0  13 -13    5.70    8.20
   0 -13  13   -5.00    8.10
   0  13 -14    2.70    8.40
   0  13 -14    7.20   11.80
   0 -13  14   -7.30    8.40
   0  13 -15   11.10    8.70
   0 -13  15   12.80    9.00
   0  14  15    4.40   12.00
   0  14  15   17.00   10.70
   0  14  14   14.10    9.80
   0  14  14   -0.30   11.10
   0  14  13   12.20   10.60
   0  14  13   20.40    9.10
   0  14  12   20.30    8.50
   0  14  12   11.80   10.40
   0  14  11    9.00    9.80
   0  14  11    8.90    7.90
   0  14  10   24.60    7.50
   0  14  10    5.20    9.90
   0  14   9   17.50    6.80
   0  14   9    3.90    9.30
   0  14   8   26.90    9.50
   0  14   8   19.10    6.40
   0  14   7   12.70    8.90
   0  14   6   -6.20    4.40
   0  14   6   -1.40    8.70
   0  14   5   32.80    9.10
   0  14   5   27.90    4.70
   0 -14  -5   33.00    5.30
   0  14   4  108.79    7.80
   0  14   4  108.39   10.90
   0 -14  -4  115.19    8.10
   0 -14  -4  110.59    8.00
   0  14   3   27.10    8.60
   0  14   3   19.20    4.70
   0 -14  -3   11.00    4.70
   0 -14  -3   21.00    4.50
   0  14   2    8.70    8.40
   0  14   2  -12.80    4.30
   0 -14  -2   -8.60    4.30
   0 -14  -2   -5.90    4.50
   0  14   1    8.20    8.40
   0  14   1   -2.50    4.60
   0 -14  -1   -5.10    4.40
   0 -14  -1    0.70    4.60
   0  14   0   -7.70    4.70
   0  14   0    1.50    8.10
   0 -14   0  -10.10    4.40
   0 -14   0   -7.90    4.50
   0  14  -1    3.20    8.00
   0  14  -1   -3.00    5.00
   0 -14   1   -1.20    4.20
   0  14  -2   -4.20    5.10
   0 -14   2   -1.80    5.40
   0 -14   2    1.30    3.30
   0  14  -3   20.20    5.80
   0 -14   3    9.30    5.00
   0 -14   3    9.80    5.80
   0  14  -4   98.59    9.20
   0 -14   4  113.79    9.50
   0 -14   4  113.09    9.10
   0  14  -5   23.40    6.20
   0 -14   5   29.40    5.90
   0 -14   5   30.70    6.40
   0  14  -6   -0.50    6.10
   0 -14   6    5.30    6.20
   0 -14   6   -0.60    5.30
   0  14  -7   -3.50    6.70
   0 -14   7   -7.60    5.80
   0 -14   7    7.40    6.60
   0  14  -8    6.60    7.10
   0 -14   8    9.60    7.10
   0  14  -9  -14.10    7.20
   0 -14   9   -3.90    7.10
   0  14 -10    9.30    7.50
   0 -14  10   -7.60    7.30
   0  14 -11   -6.50    7.60
   0 -14  11   -6.30    7.90
   0  14 -12   -7.30    8.00
   0  14 -12   16.70   12.50
   0 -14  12   -3.10    7.80
   0  14 -13   11.70   12.50
   0  14 -13    0.80    8.40
   0 -14  13    1.80    8.40
   0  14 -14   -3.30   12.20
   0  14 -14    6.10    8.80
   0 -14  14   -0.60    8.80
   0  14 -15   -5.90    8.60
   0 -14  15   -4.50    9.10
   0  15  14   20.10   10.30
   0  15  14   17.60   12.30
   0  15  13   31.40    9.90
   0  15  13    4.30   11.30
   0  15  12    4.60   10.90
   0  15  12   18.60    8.60
   0  15  11   48.00   11.70
   0  15  11   70.39    9.10
   0  15  10   20.70   10.70
   0  15  10   48.50    8.00
   0  15   9   49.50    7.40
   0  15   9   37.00   11.00
   0  15   8   -1.90    9.50
   0  15   7   37.50   10.50
   0  15   6   34.40   10.20
   0  15   5  133.49    8.20
   0  15   5  145.89   14.50
   0  15   4    2.20    4.60
   0  15   4  -11.60    9.00
   0  15   3   46.80    5.40
   0  15   3   57.09   10.60
   0 -15  -3   46.50    5.60
   0  15   2   31.40    5.30
   0  15   2   34.70    9.50
   0 -15  -2   26.40    5.40
   0 -15  -2   10.90    5.10
   0  15   1   28.10    5.30
   0  15   1   29.40    9.40
   0 -15  -1   15.00    5.10
   0 -15  -1   28.40    5.30
   0  15   0   -2.50    8.90
   0  15   0   -3.90    5.10
   0 -15   0   -1.60    4.80
   0  15  -1   20.40    5.60
   0  15  -1   23.70    9.10
   0 -15   1   25.60    6.10
   0  15  -2   26.00    6.20
   0 -15   2   33.00    6.40
   0 -15   2   22.50    5.40
   0  15  -3   52.99    6.80
   0 -15   3   55.99    6.20
   0 -15   3   53.19    6.90
   0  15  -4   -1.20    5.90
   0 -15   4    0.70    5.30
   0 -15   4    1.60    6.20
   0  15  -5  144.59   10.60
   0 -15   5  145.89   10.00
   0 -15   5  133.79   10.80
   0  15  -6   34.10    7.40
   0 -15   6   37.00    7.40
   0  15  -7   24.80    7.60
   0 -15   7   36.00    7.50
   0  15  -8    7.10    7.40
   0 -15   8   -3.90    7.10
   0  15  -9   39.40    8.10
   0 -15   9   38.90    8.20
   0  15 -10   29.00    8.30
   0 -15  10   21.80    8.10
   0  15 -11   62.29    9.40
   0 -15  11   41.90    8.80
   0  15 -12   -6.60    8.50
   0  15 -12    7.50   13.30
   0 -15  12   -2.50    8.30
   0  15 -13   13.60   13.70
   0  15 -13   10.70    9.00
   0 -15  13   12.30    8.90
   0  15 -14    7.50   13.80
   0  15 -14    6.60    9.10
   0  16  12   31.60   12.50
   0  16  11   -8.10   11.10
   0  16  10   -2.30   10.90
   0  16   9   13.20   10.80
   0  16   8   65.79   12.20
   0  16   7   31.80   11.00
   0  16   6   -1.20   10.00
   0  16   5   33.00   11.20
   0  16   4  149.29   15.50
   0  16   3   23.70   10.70
   0 -16  -3   20.20    5.50
   0  16   2   -6.50    5.00
   0  16   2  -18.00    9.90
   0 -16  -2   -1.60    5.00
   0  16   1   17.90    5.80
   0  16   1   24.00   10.20
   0  16   0  110.79   12.10
   0  16   0   94.49    9.00
   0  16  -1   18.90    6.00
   0 -16   1   22.70    6.50
   0  16  -2   -6.00    6.00
   0 -16   2   -5.90    6.20
   0  16  -3   26.80    6.70
   0 -16   3   35.60    7.00
   0  16  -4  146.39   11.00
   0 -16   4  152.48   11.00
   0  16  -5   31.20    7.30
   0 -16   5   28.60    7.40
   0  16  -6    2.00    7.20
   0 -16   6   -8.30    7.10
   0  16  -7   26.10    7.70
   0 -16   7   19.90    7.80
   0  16  -8   51.09    8.50
   0 -16   8   52.49    8.30
   0  16  -9    6.80    7.90
   0 -16   9   11.10    7.90
   0  16 -10    6.40    8.30
   0 -16  10   -2.50    8.10
   0  16 -11    7.10    8.60
   0 -16  11   -4.30    8.40
   0  16 -12   20.60    9.30
   0  16 -12   35.50   15.00
   0 -16  12   24.00    9.10
   0  17  11    8.50   11.90
   0  17  10   17.60   12.30
   0  17   9  -13.70   11.30
   0  17   7   12.40   11.10
   0  17   6    1.20   11.30
   0  17   5    1.00   10.80
   0  17   4    4.50   10.90
   0  17   3   20.70   10.90
   0 -17  -3   21.50    5.80
   0  17   2   49.20   11.60
   0  17   1   19.90   11.10
   0  17   0   -2.80   10.60
   0 -17   0   -5.70    6.20
   0 -17   1   15.20    6.70
   0 -17   2   26.40    7.10
   0  17  -3   15.50    6.80
   0 -17   3   14.40    7.00
   0  17  -4   11.10    6.80
   0 -17   4    4.10    7.10
   0  17  -5   -1.60    7.00
   0 -17   5  -14.20    7.10
   0  17  -6    0.70    7.70
   0 -17   6   -4.70    7.40
   0  17  -7   -6.90    7.70
   0 -17   7   -7.10    7.60
   0  17  -8   -5.70    7.90
   0 -17   8    3.00    8.00
   0  17  -9   -5.90    8.20
   0 -17   9  -13.30    8.20
   0  17 -10    0.20    8.50
   0 -17  10   -1.70    8.60
   0  17 -11   10.30    9.20
   0 -17  11   -0.70    8.70
   0  18   9  -12.20   12.20
   0  18   8    2.90   12.10
   0  18   7    9.60   12.20
   0  18   6   -6.70   11.60
   0  18   5    0.60   11.80
   0  18   4   20.80   12.30
   0  18   3    6.00   12.00
   0  18   1    6.50   11.70
   0 -18  -1   13.30    6.80
   0 -18   0   66.19    7.80
   0 -18   1    9.90    7.10
   0 -18   2   -3.90    7.10
   0 -18   3  -18.80    7.20
   0 -18   4   -3.60    7.50
   0 -18   5   -8.20    7.70
   0 -18   6  -13.20    7.60
   0 -18   7   -4.00    8.10
   0 -18   8    9.10    8.70
   0 -18   9  -11.60    8.40
   0  19   7   17.90   13.30
   0  19   5   15.40   13.10
   0 -19  -2   34.80    7.30
   0 -19  -1   10.20    7.10
   0 -19   0   -4.10    7.00
   0 -19   1    7.50    7.40
   0 -19   2   27.10    7.90
   0 -19   3   15.90    8.00
   0 -19   4   -1.70    8.00
   0 -19   5    8.50    8.10
   0 -19   6   23.20    8.80
   0 -19   7   -0.80    8.50
   0 -20  -3    0.30    7.10
   0 -20  -2   -7.00    7.10
   0 -20  -1   23.30    7.60
   0 -20   0   38.10    8.20
   0 -20   1   25.20    8.10
   0 -20   2    0.00    7.80
   0 -20   3    4.60    8.30
  -1 -20   3   13.00    8.20
  -1 -20   2    6.10    8.00
  -1 -20   1   -2.80    7.70
  -1 -20   0    4.50    7.90
  -1 -20  -1   -1.00    7.70
  -1 -20  -2   -4.20    7.40
  -1 -19   7  -10.90    8.40
  -1 -19   6   13.70    8.70
  -1 -19   5   -3.00    8.10
  -1 -19   4    8.30    8.10
  -1 -19   3   11.40    8.00
  -1 -19   2    2.70    7.80
  -1 -19   1   -3.30    7.50
  -1 -19   0    3.50    7.50
  -1 -19  -3   -0.10    6.60
  -1 -19  -4   -1.20    6.40
   1  19   4   -9.20   12.50
  -1 -19  -5   15.00    6.60
   1  19   7   15.20   13.20
  -1 -18   9   -0.90    8.70
  -1 -18   8   10.40    8.60
  -1 -18   7   22.70    8.60
  -1 -18   6   -5.80    7.80
  -1 -18   5   47.90    8.70
  -1 -18   4   62.29    8.60
  -1 -18   3   47.80    8.10
  -1 -18   2   -3.20    7.20
  -1 -18   1   36.30    7.80
   1  18   0   33.80   12.30
   1  18   1   20.50   12.30
  -1 -18  -2   18.40    6.40
   1  18   2   11.00   11.60
  -1 -18  -3   54.29    7.10
  -1 -18  -4   41.00    6.90
   1  18   4   59.39   13.00
   1  18   5   33.30   12.60
   1  18   6   -4.80   11.70
   1  18   8   12.10   12.70
  -1 -17  11  -14.50    8.60
   1  17 -11   -5.80    8.80
  -1 -17  10    3.10    8.80
   1  17 -10   10.40    8.80
  -1 -17   9    0.00    8.20
   1  17  -9    2.60    8.50
  -1 -17   8    6.70    8.00
   1  17  -8    6.90    8.00
  -1 -17   7   -1.80    7.70
   1  17  -7   14.00    8.10
  -1 -17   6   33.30    8.00
   1  17  -6   23.80    7.90
  -1 -17   5    2.60    7.30
   1  17  -5   15.60    7.30
  -1 -17   4    4.90    7.20
   1  17  -4    7.20    6.80
  -1 -17   3   14.20    7.20
   1  17  -3    3.10    6.80
  -1 -17   2   29.10    7.30
   1  17  -2   22.40    6.90
   1  17   0   -6.80   10.40
  -1 -17  -1   17.20    6.20
   1  17   1   23.70   11.20
  -1 -17  -2   51.09    6.80
   1  17   2   69.69   12.70
  -1 -17  -3   23.90    6.10
   1  17   3   14.10   11.40
  -1 -17  -4    4.60    5.80
   1  17   4   -4.30   10.80
  -1 -17  -5   40.70    6.20
   1  17   5   39.60   12.10
   1  17   6   73.49   12.80
   1  17   7   14.80   11.60
   1  17  10   41.20   13.00
   1  17  11   20.00   12.30
  -1 -16  12  -10.00    8.70
   1  16 -12    1.20    8.80
  -1 -16  11    3.20    8.40
   1  16 -11   -5.00    8.40
  -1 -16  10   -7.00    7.90
   1  16 -10    3.40    8.40
  -1 -16   9   -0.70    7.80
   1  16  -9    8.40    8.00
  -1 -16   8  -13.50    7.10
   1  16  -8   -7.60    7.60
  -1 -16   7   -9.60    7.20
   1  16  -7   -3.40    7.30
  -1 -16   6   -4.90    6.90
   1  16  -6   -7.60    6.90
  -1 -16   5   27.30    7.40
   1  16  -5   17.40    7.00
  -1 -16   4  -13.30    6.70
   1  16  -4  -22.00    6.50
  -1 -16   3   -5.20    6.60
   1  16  -3   -3.00    6.40
  -1 -16   2    3.30    6.50
   1  16  -2  -14.90    5.90
   1  16  -1   17.50    6.20
  -1 -16   0   10.20    5.70
   1  16   0    4.90    5.80
   1  16   0    2.30    9.90
  -1 -16  -1   -4.30    5.50
   1  16   1   -1.40    5.40
   1  16   1   -0.10    9.70
  -1 -16  -2   -7.90    5.40
   1  16   2    3.90    5.40
   1  16   2   -3.40    9.80
  -1 -16  -3   11.80    5.50
   1  16   3   -0.80   10.00
  -1 -16  -4    6.90    5.50
   1  16   4    1.20   10.10
  -1 -16  -5    6.50    5.90
   1  16   5    4.40   10.30
  -1 -16  -6    3.10    6.00
   1  16   6   -0.20   10.10
   1  16   7    0.80   10.40
   1  16   9    8.30   10.80
   1  16  11   -0.10   11.20
   1  16  12   -4.40   11.50
  -1 -15  14    0.30    9.20
   1  15 -14   -8.90    9.10
   1  15 -14    8.70   13.60
  -1 -15  13   -2.40    8.60
   1  15 -13   -2.10    8.60
   1  15 -13    9.50   13.40
  -1 -15  12    1.00    8.40
   1  15 -12   -2.00    8.50
  -1 -15  11  -12.60    8.00
   1  15 -11    1.50    8.10
  -1 -15  10   19.70    8.10
   1  15 -10   23.50    8.30
  -1 -15   9    5.00    7.60
   1  15  -9    1.50    7.60
  -1 -15   8   -5.80    7.10
   1  15  -8    5.40    7.50
  -1 -15   7   -6.50    6.80
   1  15  -7    3.00    7.10
  -1 -15   6  152.08   11.20
  -1 -15   6  156.48   10.70
   1  15  -6  157.08   11.50
  -1 -15   5   45.50    7.20
  -1 -15   5   30.60    6.30
   1  15  -5   42.10    7.20
  -1 -15   4    9.00    5.40
  -1 -15   4    2.80    6.40
   1  15  -4    2.10    6.30
  -1 -15   3    9.40    6.30
  -1 -15   3    2.40    5.30
   1  15  -3   -1.00    5.90
  -1 -15   2   52.89    6.30
   1  15  -2   49.90    6.60
  -1 -15   1   22.60    5.60
  -1 -15   1   10.60    4.80
   1  15  -1   13.00    5.70
   1  15  -1   20.60    9.10
  -1 -15   0   -5.10    5.00
  -1 -15   0    1.90    3.30
   1  15   0   -7.90    5.10
   1  15   0   -1.80    8.90
  -1 -15  -1    2.90    5.00
  -1 -15  -1    0.80    5.40
   1  15   1   -6.90    5.00
   1  15   1   -2.20    8.70
  -1 -15  -2   62.59    6.10
  -1 -15  -2   55.69    6.10
   1  15   2   56.39    6.00
   1  15   2   73.29   10.30
  -1 -15  -3   -4.50    4.80
   1  15   3   -2.90    9.20
   1  15   3   -7.30    4.80
  -1 -15  -4   37.40    6.00
   1  15   4   35.80    5.40
   1  15   4   31.60   10.00
  -1 -15  -5   25.70    5.90
   1  15   5   17.80    5.40
   1  15   5   29.30   10.00
  -1 -15  -6  112.69    8.90
   1  15   6  105.49   11.90
  -1 -15  -7   12.80    6.00
   1  15   7   12.10   10.10
  -1 -15  -8   -4.20    6.00
   1  15   8   -0.30    9.70
   1  15   9   -2.00   10.10
   1  15  10    7.40   10.40
   1  15  11    4.50   10.90
   1  15  12    5.00   11.20
  -1 -14  15    0.50    9.60
   1  14 -15   12.10    9.20
  -1 -14  14  -13.50    8.70
   1  14 -14  -12.30    8.70
   1  14 -14   -0.20   12.40
  -1 -14  13   29.60    9.00
   1  14 -13   34.50   13.20
   1  14 -13   33.50    9.00
  -1 -14  12   30.50    9.00
   1  14 -12   33.30    8.80
  -1 -14  11   35.00    8.50
   1  14 -11   38.10    8.50
  -1 -14  10   -4.10    7.40
   1  14 -10   -6.90    7.30
  -1 -14   9   96.49    9.00
   1  14  -9   83.29    8.90
  -1 -14   8   66.99    8.00
   1  14  -8   71.49    8.30
  -1 -14   7  146.89   11.00
   1  14  -7  172.18   11.40
  -1 -14   6   10.70    5.90
  -1 -14   6    6.60    6.30
   1  14  -6    4.10    6.20
  -1 -14   5   15.30    5.40
  -1 -14   5   13.80    6.20
   1  14  -5    9.80    6.10
  -1 -14   4   29.30    5.60
  -1 -14   4   46.70    6.60
   1  14  -4   35.70    6.50
  -1 -14   3   43.50    5.60
  -1 -14   3   52.79    6.50
   1  14  -3   42.60    6.20
  -1 -14   2   -0.10    4.70
   1  14  -2   -8.60    5.20
  -1 -14   1   69.89    6.20
   1  14  -1   88.29    8.30
   1  14  -1   85.19    9.90
  -1 -14   0   53.19    6.00
  -1 -14   0   62.29    5.70
   1  14   0   72.99    6.10
   1  14   0   87.59   10.10
  -1 -14  -1  104.59    8.30
  -1 -14  -1   84.49    8.10
   1  14   1   97.79   10.40
   1  14   1   88.59    8.10
  -1 -14  -2   -2.80    4.60
  -1 -14  -2  -11.60    4.60
   1  14   2    4.00    8.40
   1  14   2   -8.40    4.70
  -1 -14  -3   26.80    5.20
  -1 -14  -3   35.80    5.50
   1  14   3   33.70    5.10
   1  14   3   33.50    9.10
  -1 -14  -4   24.90    5.50
  -1 -14  -4   20.40    5.20
   1  14   4   28.50    5.20
   1  14   4   29.40    8.90
  -1 -14  -5   93.39    8.20
  -1 -14  -5   64.39    6.00
   1  14   5   91.69    7.80
   1  14   5   89.39   10.50
  -1 -14  -6   -1.60    5.00
  -1 -14  -6   -9.50    5.30
   1  14   6    0.80    8.80
   1  14   6   -6.10    4.80
  -1 -14  -7  109.09    8.70
   1  14   7   74.09    6.20
   1  14   7   99.29   10.90
   1  14   8   82.59   11.10
  -1 -14  -9  137.09    9.40
   1  14   9  161.18   11.30
   1  14   9  115.09   12.40
   1  14  10    0.60    9.90
   1  14  10   21.20    7.70
   1  14  11    1.40   10.10
   1  14  11    9.50    8.30
   1  14  12   25.50   11.00
   1  14  13   36.00   11.50
   1  14  14    5.20   11.20
  -1 -13  16  -10.10    9.30
   1  13 -16    0.20    8.90
  -1 -13  15   10.70    9.30
   1  13 -15   -5.40    8.70
  -1 -13  14   39.60    9.60
   1  13 -14   46.00   12.80
   1  13 -14   70.79    9.80
  -1 -13  13    7.00    8.40
   1  13 -13   -8.60    7.90
   1  13 -13   14.80   11.80
  -1 -13  12  -22.30    7.40
   1  13 -12  -10.10    7.70
  -1 -13  11    2.40    7.80
   1  13 -11    0.20    7.60
  -1 -13  10   55.89    8.10
   1  13 -10   57.79    8.30
  -1 -13   9    6.10    6.70
   1  13  -9    3.70    6.80
  -1 -13   8    2.70    6.40
   1  13  -8    5.00    6.60
  -1 -13   7   17.40    5.60
  -1 -13   7   11.30    6.20
   1  13  -7    7.10    6.10
  -1 -13   6   25.80    6.20
  -1 -13   6   18.90    5.60
   1  13  -6   22.80    6.10
  -1 -13   5    2.20    5.60
  -1 -13   5    0.40    4.80
   1  13  -5   -0.60    5.60
  -1 -13   4   -5.30    5.30
  -1 -13   4   -3.80    4.70
   1  13  -4   -3.30    5.30
  -1 -13   3    8.80    4.70
   1  13  -3   14.70    5.40
  -1 -13   2   20.10    4.40
  -1 -13   2   22.10    4.90
   1  13  -2   24.40    5.30
  -1 -13   1    1.00    3.30
  -1 -13   1    5.30    4.40
   1  13  -1    0.70    4.60
   1  13  -1   -9.90    7.20
  -1 -13   0   -7.10    4.00
  -1 -13   0   -2.60    4.10
   1  13   0  -11.20    7.50
   1  13   0   -6.70    4.30
  -1 -13  -1   20.60    4.50
  -1 -13  -1   19.60    4.50
   1  13   1   12.90    7.80
   1  13   1   17.90    4.50
  -1 -13  -2  110.39    7.90
  -1 -13  -2   97.99    7.80
   1  13   2   93.39    9.70
   1  13   2  109.49    7.60
  -1 -13  -3  134.29    8.40
  -1 -13  -3  127.79    8.20
   1  13   3  128.49   12.30
   1  13   3  135.19    8.00
  -1 -13  -4   69.39    5.90
  -1 -13  -4   89.49    7.60
   1  13   4   82.59    7.40
   1  13   4   87.59    9.70
  -1 -13  -5   19.80    5.00
  -1 -13  -5   13.80    4.70
   1  13   5   18.60    4.80
   1  13   5   27.40    8.50
  -1 -13  -6   99.99    7.70
  -1 -13  -6   97.09    8.20
   1  13   6  100.69   10.00
   1  13   6   91.39    7.60
  -1 -13  -7   23.80    4.70
  -1 -13  -7   20.00    5.50
   1  13   7   27.50    8.80
   1  13   7   30.30    5.00
  -1 -13  -8   -3.10    5.30
  -1 -13  -8   -3.30    4.50
   1  13   8   10.30    6.00
   1  13   8   -4.90    4.50
   1  13   8   -5.40    8.50
   1  13   9   -0.60    4.90
   1  13   9   20.50    6.80
   1  13   9    7.20    8.90
  -1 -13 -10   97.89    7.60
   1  13  10  101.39   11.50
   1  13  10  131.09   11.00
  -1 -13 -11   63.69    7.00
   1  13  11   57.79   10.90
   1  13  11   70.49    9.00
  -1 -13 -12   65.19    7.10
   1  13  12   53.09   11.00
   1  13  12   74.39   10.00
  -1 -13 -13   -8.60    6.40
   1  13  13    7.30    9.00
   1  13  13    9.80   10.30
  -1 -13 -14   62.89    7.80
  -1 -13 -15   18.30    7.60
  -1 -12  16   -0.20    8.90
   1  12 -16    2.60    8.80
  -1 -12  15   11.10    9.00
   1  12 -15    3.60    8.70
  -1 -12  14   -5.40    8.10
   1  12 -14   -1.70    8.20
   1  12 -14   -3.40   10.40
  -1 -12  13    8.20    8.10
   1  12 -13    7.90   10.70
   1  12 -13    6.80    7.80
  -1 -12  12  -16.90    7.70
   1  12 -12  -19.00    7.50
  -1 -12  11    6.50    7.30
   1  12 -11    1.30    5.30
   1  12 -11   13.20    7.20
  -1 -12  10   -1.50    6.60
   1  12 -10   -5.10    6.70
   1  12 -10   -1.50    4.90
  -1 -12   9   -1.40    6.20
   1  12  -9   -1.40    6.30
  -1 -12   8    1.10    6.00
   1  12  -8   -2.70    5.90
  -1 -12   7   69.99    6.80
  -1 -12   7   73.39    6.50
   1  12  -7   73.09    7.00
  -1 -12   6    5.30    5.40
  -1 -12   6    2.30    4.80
   1  12  -6    4.80    5.30
  -1 -12   5    0.30    5.10
  -1 -12   5   -1.80    4.60
   1  12  -5   -5.90    5.10
  -1 -12   4   -4.20    4.90
  -1 -12   4  -10.70    4.10
   1  12  -4  -12.60    4.80
  -1 -12   3   21.20    4.50
   1  12  -3   26.70    5.10
  -1 -12   2    6.20    4.10
  -1 -12   2    0.90    2.40
   1  12  -2    3.50    4.30
  -1 -12   1    6.60    4.10
  -1 -12   1   13.70    4.10
   1  12  -1    3.90    4.20
   1  12  -1    9.80    6.80
  -1 -12   0    2.90    3.90
  -1 -12   0    1.50    3.80
   1  12   0    5.50    4.00
   1  12   0    0.40    6.60
  -1 -12  -1    3.30    4.00
  -1 -12  -1    2.60    3.60
   1  12   1    0.20    6.60
   1  12   1   -1.20    3.90
  -1 -12  -2    3.50    4.10
  -1 -12  -2    4.00    4.20
   1  12   2    7.10    6.60
   1  12   2    3.80    3.90
  -1 -12  -3   -3.10    4.10
  -1 -12  -3    1.20    4.00
   1  12   3   -3.20    6.90
   1  12   3    1.30    4.00
  -1 -12  -4   -4.90    4.10
  -1 -12  -4    4.80    4.20
   1  12   4   -3.10    4.00
   1  12   4    1.10    7.00
  -1 -12  -5    9.20    4.30
  -1 -12  -5   12.20    4.60
   1  12   5   18.30    4.30
   1  12   5    8.70    7.20
  -1 -12  -6   25.40    5.00
  -1 -12  -6   36.30    4.50
   1  12   6   28.20    8.00
   1  12   6   30.90    4.60
  -1 -12  -7   21.40    4.90
  -1 -12  -7   15.60    4.20
   1  12   7   11.50    7.80
   1  12   7   10.50    5.50
   1  12   7   15.50    4.50
  -1 -12  -8  -12.00    5.00
  -1 -12  -8   -3.20    4.10
   1  12   8   -4.60    4.40
   1  12   8   -1.00    7.80
   1  12   8   11.40    5.90
  -1 -12  -9   25.90    6.20
  -1 -12  -9   17.10    4.50
  -1 -12  -9   23.20    5.50
   1  12   9   37.10    8.70
   1  12   9   24.70    5.00
   1  12   9   39.30    7.00
  -1 -12 -10   14.50    5.70
   1  12  10   18.40    8.90
   1  12  10   16.50    5.10
   1  12  10   29.80    7.40
  -1 -12 -11   -5.40    5.80
   1  12  11   15.90    7.60
   1  12  11   -3.30    9.00
  -1 -12 -12    2.60    6.30
   1  12  12   20.40    8.40
  -1 -12 -13   64.59    7.50
   1  12  13   53.29    9.70
  -1 -12 -14   11.50    7.10
   1  12  14   19.20    9.90
  -1 -12 -15   -6.40    7.20
   1  12  15    5.50   10.20
  -1 -12 -16    3.80    7.80
  -1 -11  17   11.90    9.60
   1  11 -17   17.30    9.70
  -1 -11  16   13.90    9.20
   1  11 -16   27.10    9.10
  -1 -11  15   -2.40    8.60
   1  11 -15    1.90    8.40
  -1 -11  14   33.90    8.80
   1  11 -14   35.20    8.50
   1  11 -14   16.30   10.60
  -1 -11  13   -7.50    7.50
   1  11 -13   -4.20   10.30
   1  11 -13    0.30    7.80
  -1 -11  12    1.10    7.20
   1  11 -12    2.00    9.40
   1  11 -12    0.70    7.00
  -1 -11  11    0.80    6.80
   1  11 -11    1.80    6.90
   1  11 -11    4.60    5.20
  -1 -11  10   45.40    7.10
   1  11 -10   29.90    5.70
   1  11 -10   46.00    7.20
  -1 -11   9   19.60    6.10
   1  11  -9   22.20    6.40
   1  11  -9   16.00    5.10
  -1 -11   8   14.40    5.70
  -1 -11   8    7.10    5.10
   1  11  -8    5.80    5.70
  -1 -11   7   -0.40    5.30
  -1 -11   7   -6.00    4.60
   1  11  -7   -5.80    5.20
  -1 -11   6  239.58   10.70
  -1 -11   6  261.67   10.80
   1  11  -6  250.27   10.90
  -1 -11   5   57.29    5.80
  -1 -11   5   51.09    5.30
   1  11  -5   64.49    5.90
  -1 -11   4   51.59    5.10
  -1 -11   4   46.60    5.30
   1  11  -4   44.40    5.20
  -1 -11   3   -9.70    3.80
  -1 -11   3    8.40    3.40
   1  11  -3    7.40    4.30
  -1 -11   2   62.59    5.00
  -1 -11   2   39.20    3.90
  -1 -11   1   36.50    4.30
  -1 -11   1   26.60    4.30
   1  11  -1   32.50    6.60
   1  11  -1   38.90    4.50
   1  11  -1   29.20    3.90
  -1 -11   0   42.60    4.50
  -1 -11   0   35.70    4.10
   1  11   0   47.40    7.00
   1  11   0   39.70    4.00
   1  11   0   36.80    4.30
  -1 -11  -1   -2.40    3.70
  -1 -11  -1   -2.90    3.70
   1  11   1   -3.20    3.60
   1  11   1   -5.30    6.00
   1  11   1   -2.20    3.30
  -1 -11  -2   35.50    4.30
  -1 -11  -2   36.80    4.40
   1  11   2   29.30    3.70
   1  11   2   35.40    4.20
   1  11   2   30.90    6.60
  -1 -11  -3   13.60    3.80
  -1 -11  -3   19.10    4.00
   1  11   3   14.60    3.80
   1  11   3   13.90    3.60
   1  11   3    9.20    6.40
  -1 -11  -4   79.79    6.60
  -1 -11  -4   82.99    6.40
   1  11   4   69.49    7.70
   1  11   4   74.59    6.20
   1  11   4   70.39    6.20
  -1 -11  -5    2.00    3.90
  -1 -11  -5    2.80    3.80
   1  11   5   -1.70    3.60
   1  11   5    0.80    6.30
   1  11   5   -1.70    3.30
  -1 -11  -6   68.69    6.50
  -1 -11  -6   70.69    6.50
   1  11   6   79.99    8.40
   1  11   6   60.39    6.10
   1  11   6   71.69    6.30
  -1 -11  -7   -1.40    3.80
  -1 -11  -7   -8.60    4.80
  -1 -11  -7    2.00    4.40
   1  11   7    2.10    5.10
   1  11   7   -3.50    3.90
   1  11   7    0.60    7.00
  -1 -11  -8   -1.50    4.60
  -1 -11  -8   -2.10    3.80
  -1 -11  -8    1.50    5.30
   1  11   8   -1.30    4.00
   1  11   8   12.80    5.80
   1  11   8    3.10    7.10
  -1 -11  -9   -3.60    3.80
  -1 -11  -9   -5.50    5.60
  -1 -11  -9    1.80    4.80
   1  11   9   -2.50    7.30
   1  11   9    1.00    6.30
   1  11   9   -0.30    4.40
  -1 -11 -10   52.99    5.10
  -1 -11 -10   52.49    6.10
   1  11  10   86.09   10.10
   1  11  10   49.10    5.60
  -1 -11 -11   24.00    6.00
   1  11  11   36.60    8.00
   1  11  11   21.60    5.30
  -1 -11 -12   14.80    6.30
   1  11  12   26.20    8.40
   1  11  12   12.70    5.70
  -1 -11 -13   17.00    6.80
   1  11  13   22.60    8.90
  -1 -11 -14    6.30    7.00
   1  11  14   25.00    9.60
  -1 -11 -15    3.00    7.40
   1  11  15    4.80   10.20
  -1 -11 -16   -2.60    7.90
   1  11  16    5.50   10.80
  -1 -11 -17   10.20    8.40
  -1 -10  18   -4.40    9.40
   1  10 -18   -9.40    9.00
  -1 -10  17   40.10    9.70
   1  10 -17   42.10    9.60
  -1 -10  16    4.00    8.70
   1  10 -16    6.20    8.50
  -1 -10  15  114.49   10.50
   1  10 -15   98.09   10.10
  -1 -10  14    8.00    7.80
   1  10 -14   -3.30    7.20
  -1 -10  13   92.89    8.80
   1  10 -13   93.69   14.60
   1  10 -13   91.79    9.00
  -1 -10  12   25.70    7.30
   1  10 -12    9.00    6.90
   1  10 -12   34.80    9.40
  -1 -10  11   45.40    7.40
   1  10 -11   43.90    6.40
   1  10 -11   55.99    7.30
  -1 -10  10   -1.60    5.90
   1  10 -10   -9.10    4.80
   1  10 -10    0.80    5.80
  -1 -10   9  152.38   10.00
   1  10  -9  190.68   10.60
   1  10  -9  170.28    9.90
  -1 -10   8   40.30    5.80
  -1 -10   8   45.00    5.50
   1  10  -8   33.20    5.00
   1  10  -8   37.40    5.90
  -1 -10   7  473.75   15.30
  -1 -10   7  490.45   15.40
   1  10  -7  478.75   15.50
  -1 -10   6   22.00    4.80
  -1 -10   6   17.00    4.30
   1  10  -6   18.10    4.80
  -1 -10   5   40.20    5.10
  -1 -10   5   40.70    4.70
   1  10  -5   43.90    5.10
  -1 -10   4   20.70    4.10
  -1 -10   4   22.60    4.80
   1  10  -4   23.80    4.40
   1  10  -4   17.20    3.80
  -1 -10   3  108.09    7.10
  -1 -10   3  102.89    7.50
   1  10  -3  104.99    7.20
   1  10  -3  109.19    6.60
  -1 -10   2    3.60    3.30
  -1 -10   2    6.20    3.60
  -1 -10   2    9.00    3.50
   1  10  -2    6.00    3.80
   1  10  -2    8.70    3.40
   1  10  -2    4.60    5.50
  -1 -10   1   26.30    3.80
  -1 -10   1   17.40    3.60
   1  10  -1   21.60    3.80
   1  10  -1   25.50    3.60
   1  10  -1   31.20    6.10
  -1 -10   0   23.30    3.40
  -1 -10   0   24.70    3.90
   1  10   0   18.80    3.40
   1  10   0   32.00    6.10
   1  10   0   26.80    3.90
  -1 -10  -1  127.69    6.90
  -1 -10  -1  125.99    7.10
   1  10   1  125.49    6.70
   1  10   1  130.89    6.80
   1  10   1  139.89    9.70
  -1 -10  -2   18.40    3.80
  -1 -10  -2   21.00    3.90
   1  10   2   11.00    3.20
   1  10   2   15.40    3.60
   1  10   2   23.30    5.90
  -1 -10  -3   25.30    3.80
  -1 -10  -3   21.50    3.60
   1  10   3   27.60    3.70
   1  10   3   18.00    3.40
   1  10   3   27.10    6.40
  -1 -10  -4    9.50    3.60
  -1 -10  -4    8.70    3.60
   1  10   4    3.10    5.70
   1  10   4    7.70    3.10
   1  10   4    6.10    3.40
  -1 -10  -5  286.47    9.80
  -1 -10  -5  296.07    9.80
   1  10   5  283.67   13.40
   1  10   5  300.07    9.70
   1  10   5  279.17    9.80
  -1 -10  -6   18.70    3.90
  -1 -10  -6    7.30    3.60
  -1 -10  -6   14.70    4.50
   1  10   6   18.60    3.70
   1  10   6   12.90    4.60
   1  10   6   13.90    6.60
   1  10   6   11.00    3.40
  -1 -10  -7   85.29    6.30
  -1 -10  -7   95.39    6.60
  -1 -10  -7   84.89    8.10
   1  10   7   75.59    8.00
   1  10   7   82.49    6.00
   1  10   7   81.69    8.00
   1  10   7   72.49    6.30
  -1 -10  -8   50.39    6.60
  -1 -10  -8   43.50    4.50
  -1 -10  -8   42.70    4.90
   1  10   8   75.79    8.60
   1  10   8   44.80    4.80
  -1 -10  -9   43.10    6.70
  -1 -10  -9   38.50    4.50
  -1 -10  -9   42.00    5.40
   1  10   9   64.29    7.20
   1  10   9   36.70    4.90
  -1 -10 -10    5.20    3.90
  -1 -10 -10    4.70    5.20
   1  10  10   15.80    6.90
   1  10  10   -3.30    4.40
  -1 -10 -11    5.90    5.60
  -1 -10 -11    7.50    4.30
   1  10  11   -0.80    5.00
   1  10  11   19.40    7.40
  -1 -10 -12   -0.90    6.00
   1  10  12    4.70    5.40
   1  10  12   16.80    8.10
  -1 -10 -13  152.08   11.00
   1  10  13  144.89   13.60
   1  10  13  145.09   10.00
  -1 -10 -14   -9.10    7.00
   1  10  14   12.50    9.00
  -1 -10 -15   44.20    8.10
   1  10  15   52.79   10.70
  -1 -10 -16   13.50    7.90
   1  10  16   13.50   10.80
  -1 -10 -17   55.69    9.10
  -1  -9  18   53.89   10.00
   1   9 -18   59.69   10.10
  -1  -9  17   -0.90    8.60
   1   9 -17   -0.80    8.40
  -1  -9  16   -5.80    8.20
   1   9 -16    4.80    8.10
  -1  -9  15   44.00    8.60
   1   9 -15   24.30    8.00
  -1  -9  14   31.90    8.00
   1   9 -14   29.70    7.80
  -1  -9  13  -10.30    6.70
   1   9 -13   -8.10    6.80
  -1  -9  12    4.70    6.80
   1   9 -12    3.90    8.00
   1   9 -12    3.80    6.60
  -1  -9  11    4.90    6.10
   1   9 -11   14.50    6.30
   1   9 -11    0.60    5.50
  -1  -9  10  236.88   11.40
   1   9 -10  241.48   11.50
   1   9 -10  208.28   11.60
  -1  -9   9   12.90    4.70
  -1  -9   9   13.20    5.20
   1   9  -9   15.30    4.90
   1   9  -9   15.10    5.40
  -1  -9   8  189.18    9.80
  -1  -9   8  200.38    9.50
   1   9  -8  188.78    9.70
   1   9  -8  203.48   10.20
  -1  -9   7   -1.50    4.10
  -1  -9   7    5.70    4.40
   1   9  -7    2.70    3.70
   1   9  -7    2.20    4.40
  -1  -9   6   20.20    4.20
  -1  -9   6   10.30    4.30
  -1  -9   6   12.50    4.30
   1   9  -6   13.00    3.20
   1   9  -6   22.10    4.50
  -1  -9   5   15.40    4.20
  -1  -9   5   21.50    4.40
  -1  -9   5   17.00    3.90
   1   9  -5   14.30    4.30
  -1  -9   4   85.39    6.80
  -1  -9   4   59.19    5.60
   1   9  -4   89.69    5.90
   1   9  -4   93.39    6.80
  -1  -9   3   17.40    3.90
  -1  -9   3   22.30    3.50
  -1  -9   3   18.00    3.40
   1   9  -3   19.60    3.50
   1   9  -3   18.40    3.80
  -1  -9   2  105.79    6.70
  -1  -9   2  110.39    6.30
   1   9  -2  107.59    8.70
   1   9  -2   99.99    6.30
   1   9  -2  102.09    6.50
  -1  -9   1   23.40    3.60
  -1  -9   1   14.70    3.40
   1   9  -1   21.90    3.60
   1   9  -1   20.50    5.50
  -1  -9   0  183.58    7.70
  -1  -9   0  185.18    7.60
   1   9   0  192.28    7.60
   1   9   0  184.38    7.40
   1   9   0  187.28   10.20
  -1  -9  -1   -1.80    3.20
  -1  -9  -1    0.40    1.10
  -1  -9  -1   -4.00    3.10
   1   9   1   -1.70    2.90
   1   9   1   -5.60    5.00
   1   9   1    0.00    3.10
  -1  -9  -2  378.76   11.20
  -1  -9  -2  377.66   11.40
   1   9   2  385.46   11.20
   1   9   2  362.56   11.10
   1   9   2  374.76   14.30
  -1  -9  -3   37.80    3.70
  -1  -9  -3   45.60    4.00
   1   9   3   49.00    6.10
   1   9   3   42.80    3.80
   1   9   3   47.30    3.80
  -1  -9  -4  138.59    6.40
  -1  -9  -4  145.69    6.90
   1   9   4  137.49    6.60
   1   9   4  148.79    9.70
   1   9   4  135.39    6.40
  -1  -9  -5   -1.60    2.60
  -1  -9  -5   -4.60    3.10
  -1  -9  -5   -3.80    3.10
   1   9   5   -3.20    5.50
   1   9   5   -3.40    3.10
   1   9   5   -6.50    3.60
   1   9   5   -3.10    3.00
  -1  -9  -6  165.28    7.30
  -1  -9  -6  167.08    9.20
  -1  -9  -6  164.68    7.40
   1   9   6  168.68    7.30
   1   9   6  160.38    7.10
   1   9   6  180.88   10.70
   1   9   6  185.28    8.90
  -1  -9  -7    9.80    4.80
  -1  -9  -7   13.30    3.60
  -1  -9  -7    9.50    3.80
   1   9   7   32.20    5.10
   1   9   7    9.40    5.60
   1   9   7   11.50    3.20
   1   9   7   12.10    3.70
  -1  -9  -8   20.70    5.50
  -1  -9  -8   21.80    4.20
  -1  -9  -8   24.90    3.80
   1   9   8   23.80    3.60
   1   9   8   32.60    5.80
   1   9   8   24.10    4.10
   1   9   8   17.70    6.10
  -1  -9  -9   15.10    4.00
  -1  -9  -9   22.20    4.80
  -1  -9  -9   24.70    6.00
   1   9   9   26.20    7.00
   1   9   9   14.90    4.50
   1   9   9   39.70    6.50
  -1  -9 -10  190.68    9.80
  -1  -9 -10  174.58    8.40
   1   9  10  182.88    9.20
   1   9  10  186.78   15.50
   1   9  10  212.38   12.20
  -1  -9 -11    6.00    5.50
  -1  -9 -11    5.90    4.20
   1   9  11   10.80    7.20
   1   9  11   19.00    7.30
   1   9  11   11.00    4.90
  -1  -9 -12  -11.30    5.60
  -1  -9 -12    1.80    4.40
   1   9  12  -15.40    7.10
   1   9  12   -9.40    5.00
   1   9  12   10.40    7.70
  -1  -9 -13   -1.30    6.40
   1   9  13    3.60    5.60
   1   9  13   10.80    8.40
  -1  -9 -14   71.99    8.00
   1   9  14   60.79    7.10
   1   9  14   87.29   10.60
  -1  -9 -15   19.80    7.80
   1   9  15   36.10   10.30
  -1  -9 -16    0.40    7.90
   1   9  16    5.50   10.50
  -1  -9 -17   10.80    8.60
   1   9  17   -2.80   11.20
  -1  -9 -18   46.30    9.60
  -1  -8  19    7.50    9.40
   1   8 -19   -1.90    9.00
  -1  -8  18    3.30    8.90
   1   8 -18   -2.60    8.50
  -1  -8  17    2.40    8.50
   1   8 -17   -4.40    8.10
  -1  -8  16   -9.40    8.10
   1   8 -16   -4.00    8.20
  -1  -8  15   -2.00    7.50
   1   8 -15    6.80    7.40
  -1  -8  14   -5.80    7.10
   1   8 -14    1.60    7.00
  -1  -8  13    0.10    6.70
   1   8 -13    3.40    6.70
  -1  -8  12   -1.40    6.10
   1   8 -12   -4.90    5.90
  -1  -8  11   79.59    7.20
   1   8 -11   77.39    9.30
   1   8 -11   79.59   12.10
   1   8 -11   77.79    7.10
  -1  -8  10    8.80    5.20
   1   8 -10   10.40    5.30
   1   8 -10   -1.90    5.00
  -1  -8   9   17.50    5.10
  -1  -8   9   18.70    4.50
   1   8  -9   21.70    5.20
   1   8  -9   21.70    5.00
  -1  -8   8   11.40    4.30
  -1  -8   8   17.00    4.70
   1   8  -8   10.00    4.40
   1   8  -8   14.00    4.80
  -1  -8   7   -0.30    4.10
  -1  -8   7   -0.60    3.70
   1   8  -7    1.70    4.10
   1   8  -7   -1.30    3.70
   1   8  -7    5.00    3.60
  -1  -8   6   -0.30    3.60
  -1  -8   6   -0.80    3.70
  -1  -8   6    0.60    3.90
   1   8  -6    2.60    3.20
   1   8  -6    0.20    3.30
   1   8  -6    0.90    3.80
  -1  -8   5  123.19    6.80
  -1  -8   5  126.79    7.60
  -1  -8   5  140.49    7.50
   1   8  -5  122.19    7.40
  -1  -8   4    2.70    3.70
  -1  -8   4   -1.50    2.10
   1   8  -4    7.20    3.70
   1   8  -4    2.40    1.80
  -1  -8   3  615.24   17.30
  -1  -8   3  671.63   17.40
   1   8  -3  643.94   17.30
   1   8  -3  651.33   17.30
  -1  -8   2  171.68    7.10
  -1  -8   2  166.78    7.30
   1   8  -2  180.58    9.40
   1   8  -2  172.58    7.10
   1   8  -2  185.38    7.40
  -1  -8   1  216.08    7.90
  -1  -8   1  212.88    7.80
   1   8  -1  220.78    7.90
   1   8  -1  225.08   10.30
   1   8  -1  225.08    7.90
  -1  -8   0    0.40    1.00
  -1  -8   0   -1.30    3.00
  -1  -8   0   -5.00    2.90
   1   8   0   -1.10    4.70
   1   8   0    0.40    3.00
   1   8   0   -1.00    2.80
  -1  -8  -1  174.28    7.20
  -1  -8  -1  186.18    7.20
   1   8   1  189.68    9.50
   1   8   1  181.98    7.00
   1   8   1  182.68    7.10
  -1  -8  -2    1.30    3.00
  -1  -8  -2   -3.30    2.80
   1   8   2    0.60    4.70
   1   8   2   -0.30    2.90
   1   8   2   -1.30    2.70
  -1  -8  -3    2.60    3.00
  -1  -8  -3   -1.70    2.70
   1   8   3    1.40    2.80
   1   8   3   -1.00    2.80
   1   8   3   -6.90    4.60
  -1  -8  -4   -4.60    3.10
  -1  -8  -4   -5.70    2.90
   1   8   4   -8.40    3.10
   1   8   4   -2.20    2.70
   1   8   4    1.40    5.10
   1   8   4   -2.90    2.90
  -1  -8  -5   12.80    3.20
  -1  -8  -5   10.00    3.20
  -1  -8  -5   11.70    3.40
   1   8   5   12.50    3.10
   1   8   5   25.00    3.90
   1   8   5   11.20    3.20
   1   8   5   15.00    5.40
  -1  -8  -6    3.90    3.20
  -1  -8  -6   10.30    4.20
  -1  -8  -6    8.00    3.20
   1   8   6   19.00    4.30
   1   8   6    9.20    2.90
   1   8   6   12.00    3.30
  -1  -8  -7   37.10    4.00
  -1  -8  -7   42.30    3.90
  -1  -8  -7   48.50    5.40
   1   8   7   40.20    4.10
   1   8   7   33.80    3.50
   1   8   7   32.30    6.20
  -1  -8  -8   17.20    5.00
  -1  -8  -8    3.50    3.90
  -1  -8  -8   10.80    3.40
   1   8   8    9.00    3.90
   1   8   8    9.30    3.10
   1   8   8    6.10    5.90
  -1  -8  -9   99.09    9.10
  -1  -8  -9   90.89    6.40
  -1  -8  -9   99.19    7.50
   1   8   9  123.89    9.40
   1   8   9   96.39   11.80
   1   8   9   98.49    7.20
  -1  -8 -10   13.00    4.00
  -1  -8 -10   10.60    4.80
  -1  -8 -10   24.30    6.50
   1   8  10    9.70    6.30
   1   8  10   31.80    6.80
   1   8  10   16.70    4.60
  -1  -8 -11   38.00    4.50
  -1  -8 -11   28.20    5.50
   1   8  11   39.10    5.40
   1   8  11   54.49    8.00
   1   8  11   21.70    7.40
  -1  -8 -12    2.40    4.10
  -1  -8 -12   -6.40    5.60
   1   8  12  -14.80    6.90
   1   8  12   11.30    7.50
   1   8  12    2.80    5.10
  -1  -8 -13   16.70    6.30
  -1  -8 -13    3.90    4.30
   1   8  13   14.30    8.40
   1   8  13   -6.30    7.60
   1   8  13   19.90    5.70
  -1  -8 -14    4.30    6.70
   1   8  14    0.80    6.00
   1   8  14    2.00    8.50
  -1  -8 -15   -4.10    7.00
   1   8  15   -3.40    6.50
   1   8  15   -0.80    9.20
  -1  -8 -16   -1.70    7.50
   1   8  16   -4.00   10.10
  -1  -8 -17   -5.70    7.80
   1   8  17   -6.90   10.80
  -1  -8 -18    6.40    8.40
  -1  -8 -19    3.30    9.30
  -1  -7  19   -5.10    8.90
   1   7 -19    0.20    8.90
  -1  -7  18   94.59   10.50
   1   7 -18   86.99   10.10
  -1  -7  17    7.20    8.30
   1   7 -17   22.30    8.40
  -1  -7  16    9.00    7.80
   1   7 -16    7.00    7.70
  -1  -7  15   -4.50    7.10
   1   7 -15   -4.10    7.10
  -1  -7  14    9.00    7.10
   1   7 -14   10.50    6.90
  -1  -7  13    8.50    6.50
   1   7 -13    2.40    6.10
  -1  -7  12   49.30    6.50
   1   7 -12   47.60    6.70
  -1  -7  11   -0.90    5.30
   1   7 -11    0.40    5.20
   1   7 -11    6.40    5.40
  -1  -7  10  196.58   10.30
   1   7 -10  195.08   10.00
   1   7 -10  185.58   10.70
  -1  -7   9   10.50    4.20
  -1  -7   9   11.40    4.70
   1   7  -9   10.50    4.70
   1   7  -9    0.50    4.10
   1   7  -9   -4.50    4.60
  -1  -7   8   -0.40    4.20
  -1  -7   8    2.20    3.70
   1   7  -8   -2.90    3.90
   1   7  -8    1.70    3.60
   1   7  -8    8.10    4.30
  -1  -7   7   12.50    4.00
  -1  -7   7   18.10    3.80
   1   7  -7   13.10    4.20
   1   7  -7   19.40    3.90
   1   7  -7   14.10    4.00
  -1  -7   6   29.80    3.90
  -1  -7   6   28.70    4.10
   1   7  -6   32.60    4.20
   1   7  -6   26.10    3.80
   1   7  -6   28.70    4.00
  -1  -7   5    3.30    3.60
  -1  -7   5    5.20    3.00
   1   7  -5    4.00    3.50
   1   7  -5    5.10    3.00
  -1  -7   4  134.59    6.70
  -1  -7   4  130.79    6.20
  -1  -7   3   56.59    5.00
  -1  -7   3   62.09    5.10
   1   7  -3   66.09    5.30
   1   7  -3   48.10    4.30
  -1  -7   2  281.77    9.00
  -1  -7   2  270.87    8.90
   1   7  -2  284.47    8.90
   1   7  -2  275.37    8.80
  -1  -7   1    5.00    2.70
  -1  -7   1   12.40    2.70
   1   7  -1   12.60    2.90
   1   7  -1   12.80    4.40
   1   7  -1   12.50    2.80
  -1  -7   0   12.80    2.90
  -1  -7   0   10.10    2.80
   1   7   0   11.20    2.70
   1   7   0   14.10    4.50
   1   7   0   12.40    2.80
  -1  -7  -1   29.50    3.10
  -1  -7  -1   20.70    2.70
   1   7   1   28.90    3.00
   1   7   1   29.70    3.00
   1   7   1   32.80    4.90
  -1  -7  -2  231.28    7.50
  -1  -7  -2  229.88    7.80
   1   7   2  219.68    7.50
   1   7   2  237.18   10.00
   1   7   2  230.98    7.50
  -1  -7  -3    0.10    2.50
  -1  -7  -3    1.20    2.80
   1   7   3    1.30    4.60
   1   7   3   -1.20    2.60
   1   7   3    2.20    2.60
  -1  -7  -4  393.96   13.40
  -1  -7  -4  385.66   11.20
  -1  -7  -4  370.76   10.90
   1   7   4  381.06   13.10
   1   7   4  376.56   10.90
   1   7   4  392.66   13.90
   1   7   4  385.46   11.10
  -1  -7  -5   -0.40    3.10
  -1  -7  -5   -2.80    2.70
  -1  -7  -5   -0.80    2.80
   1   7   5    0.20    3.40
   1   7   5   -5.30    2.60
   1   7   5   -1.30    2.90
  -1  -7  -6   76.49    5.30
  -1  -7  -6   68.59    6.70
  -1  -7  -6   72.79    5.60
   1   7   6   69.29    5.50
   1   7   6   91.99    6.60
   1   7   6   71.89    5.10
  -1  -7  -7   28.40    3.70
  -1  -7  -7   39.40    5.10
  -1  -7  -7   32.10    3.50
   1   7   7   20.80    5.50
   1   7   7   30.70    3.40
   1   7   7   29.00    3.80
  -1  -7  -8   11.90    4.90
  -1  -7  -8   14.90    3.30
  -1  -7  -8    8.40    3.30
   1   7   8   10.50    5.60
   1   7   8    8.10    3.50
   1   7   8   12.70    3.10
   1   7   8   25.60    5.20
  -1  -7  -9   24.00    4.30
  -1  -7  -9   31.50    4.00
  -1  -7  -9   29.20    5.80
   1   7   9   23.00    4.30
   1   7   9   26.00    3.70
   1   7   9   25.90    6.30
   1   7   9   50.39    6.30
  -1  -7 -10  258.27   10.30
  -1  -7 -10  250.17   12.80
  -1  -7 -10  241.08    9.40
   1   7  10  230.88   15.70
   1   7  10  275.87   13.20
   1   7  10  256.77   10.30
  -1  -7 -11    4.50    3.80
  -1  -7 -11    3.40    4.90
   1   7  11    2.60    4.70
   1   7  11   12.50    6.70
   1   7  11  -13.00    5.90
  -1  -7 -12   29.70    5.50
  -1  -7 -12   43.00    5.00
   1   7  12   31.00    7.80
   1   7  12   47.40    5.90
   1   7  12   45.60    8.40
  -1  -7 -13   -4.00    5.50
  -1  -7 -13   -2.90    2.40
   1   7  13    8.00    7.90
   1   7  13   -4.60    5.30
  -1  -7 -14   58.69    7.10
   1   7  14   47.60    6.80
   1   7  14   41.10    9.60
  -1  -7 -15   -4.60    6.80
   1   7  15    2.80    6.40
   1   7  15   -2.20    9.10
  -1  -7 -16    7.90    7.40
   1   7  16   -3.20   10.10
   1   7  16    0.60    7.10
  -1  -7 -17    3.70    8.10
   1   7  17   -4.40   10.70
  -1  -7 -18   34.70    8.80
  -1  -7 -19   -0.90    9.30
  -1  -6  20    3.20    9.70
   1   6 -20   -3.60    9.50
  -1  -6  19   83.59   10.60
   1   6 -19   81.89   10.30
  -1  -6  18  -14.60    8.00
   1   6 -18   -7.40    8.10
  -1  -6  17    4.50    8.00
   1   6 -17    2.10    7.80
  -1  -6  16    5.30    7.50
   1   6 -16    2.40    7.50
  -1  -6  15   18.00    7.30
   1   6 -15   19.40    7.40
  -1  -6  14   -0.20    6.50
   1   6 -14   -7.50    6.20
  -1  -6  13   10.30    6.40
   1   6 -13   11.20    6.20
  -1  -6  12   -6.10    5.50
   1   6 -12   -1.30    5.40
  -1  -6  11  228.38   10.90
   1   6 -11  238.68   10.80
   1   6 -11  214.38   12.10
  -1  -6  10    9.40    4.30
  -1  -6  10    2.90    4.70
   1   6 -10    4.40    4.90
   1   6 -10    2.70    4.10
   1   6 -10   -1.60    4.60
  -1  -6   9  250.87   10.00
  -1  -6   9  247.18   10.40
   1   6  -9  242.18   10.10
   1   6  -9  244.68   11.40
   1   6  -9  249.48    9.90
  -1  -6   8   65.69    5.10
  -1  -6   8   67.99    6.50
   1   6  -8   54.79    4.80
   1   6  -8   57.49    5.60
   1   6  -8   67.29    5.30
  -1  -6   7  497.05   14.70
  -1  -6   7  508.35   14.60
   1   6  -7  511.05   14.60
   1   6  -7  478.25   17.20
   1   6  -7  522.45   14.90
  -1  -6   6   -0.10    3.20
  -1  -6   6   -3.80    3.30
   1   6  -6   -1.40    3.40
   1   6  -6   -2.80    3.10
   1   6  -6   -5.50    3.20
  -1  -6   5  237.08    8.50
   1   6  -5  222.38    8.10
   1   6  -5  225.08    8.80
   1   6  -5  215.28    8.30
  -1  -6   4    7.50    2.90
  -1  -6   4   -0.10    1.40
   1   6  -4    5.50    3.00
   1   6  -4   -0.20    2.10
  -1  -6   2   71.49    4.90
  -1  -6   2   68.59    4.80
   1   6  -2   62.59    4.30
   1   6  -2   75.89    4.80
  -1  -6   1  168.48    6.20
  -1  -6   1  160.28    6.20
   1   6  -1  164.98    6.20
   1   6  -1  164.98    8.10
   1   6  -1  161.08    6.10
  -1  -6   0   15.90    2.60
  -1  -6   0   17.20    2.70
   1   6   0   17.00    2.60
   1   6   0   17.20    2.60
   1   6   0   17.60    4.10
  -1  -6  -1  209.68    7.10
  -1  -6  -1  229.98    7.10
   1   6   1  220.58    7.10
   1   6   1  221.98    7.10
   1   6   1  221.08    9.20
  -1  -6  -2   83.79    4.80
  -1  -6  -2   89.59    4.70
   1   6   2   84.59    6.60
   1   6   2   80.89    4.60
   1   6   2   82.39    4.60
  -1  -6  -3  144.39    5.80
  -1  -6  -3  155.18    6.60
  -1  -6  -3  132.09    5.60
   1   6   3  145.69    5.80
   1   6   3  137.79    6.30
   1   6   3  137.49    5.70
   1   6   3  152.78    8.00
  -1  -6  -4   65.69    5.50
  -1  -6  -4   67.29    4.80
  -1  -6  -4   65.69    4.60
   1   6   4   59.19    4.60
   1   6   4   65.29    5.00
   1   6   4   52.69    4.60
  -1  -6  -5   38.90    3.30
  -1  -6  -5   25.90    3.10
  -1  -6  -5   39.40    4.20
   1   6   5   56.79    5.30
   1   6   5   34.80    3.30
   1   6   5   32.90    3.10
  -1  -6  -6    2.10    2.70
  -1  -6  -6   -2.70    3.50
  -1  -6  -6    1.60    2.70
   1   6   6   10.50    3.80
   1   6   6   -0.20    2.70
   1   6   6    3.10    2.50
  -1  -6  -7  514.75   13.90
  -1  -6  -7  508.45   17.80
   1   6   7  484.95   14.10
   1   6   7  479.85   13.70
   1   6   7  523.85   17.80
   1   6   7  507.45   23.80
  -1  -6  -8   43.20    4.30
  -1  -6  -8   62.69    7.40
  -1  -6  -8   51.69    4.10
   1   6   8   47.80    4.40
   1   6   8   49.50    6.50
   1   6   8   76.29    7.70
   1   6   8   57.49    5.40
  -1  -6  -9   78.39    6.00
  -1  -6  -9   87.89    6.50
  -1  -6  -9   75.49    8.30
   1   6   9  103.99    8.70
   1   6   9   64.49    9.60
   1   6   9   87.59    6.80
   1   6   9   89.49    6.00
  -1  -6 -10   25.20    3.90
  -1  -6 -10   25.00    5.70
  -1  -6 -10   22.00    4.20
   1   6  10   23.40    4.60
   1   6  10   14.30    6.00
   1   6  10   35.60    6.60
  -1  -6 -11  129.69    8.50
  -1  -6 -11  125.89    7.30
   1   6  11  136.69   11.10
   1   6  11  107.59   12.10
   1   6  11  131.59    8.40
  -1  -6 -12   12.80    3.50
  -1  -6 -12   21.70    5.40
   1   6  12   18.60    7.60
   1   6  12   23.00    5.10
  -1  -6 -13  119.09    9.60
   1   6  13   94.39   10.30
   1   6  13  113.59    9.40
  -1  -6 -14    0.30    4.20
  -1  -6 -14   -2.10    6.10
   1   6  14   -1.80    8.40
   1   6  14   -3.50    5.60
  -1  -6 -15    3.60    6.70
   1   6  15    1.60    6.10
   1   6  15    3.20    9.10
  -1  -6 -16    7.20    7.30
   1   6  16    8.30    9.80
   1   6  16    5.20    6.60
  -1  -6 -17   50.99    8.70
   1   6  17   45.20   11.90
  -1  -6 -18   -4.80    8.40
  -1  -6 -19   52.79    9.90
  -1  -5  20  -10.30    9.00
   1   5 -20   18.20    9.50
  -1  -5  19   -0.40    8.70
   1   5 -19    1.80    8.70
  -1  -5  18   20.70    8.50
   1   5 -18   31.10    8.50
  -1  -5  17   -4.80    7.60
   1   5 -17    2.10    7.60
  -1  -5  16    0.40    7.20
   1   5 -16   -4.90    6.90
  -1  -5  15   -6.10    6.60
   1   5 -15    0.40    6.70
  -1  -5  14  179.08   11.60
  -1  -5  14  180.08   13.70
   1   5 -14  173.18   11.40
  -1  -5  13    2.30    7.10
  -1  -5  13   -0.30    5.90
   1   5 -13    0.30    5.60
  -1  -5  12   62.69    6.50
  -1  -5  12   56.99    7.50
   1   5 -12   57.59    6.50
  -1  -5  11   -0.20    4.70
  -1  -5  11   -0.70    5.80
   1   5 -11   -4.70    4.70
   1   5 -11    1.90    5.20
   1   5 -11   -2.00    4.10
  -1  -5  10  154.58    8.80
  -1  -5  10  149.29   10.00
  -1  -5  10  151.48    8.30
   1   5 -10  154.98    8.20
   1   5 -10  150.58    9.80
   1   5 -10  141.29    8.60
  -1  -5   9    1.60    3.60
  -1  -5   9   -1.70    4.60
  -1  -5   9    1.80    4.10
   1   5  -9    6.00    4.10
   1   5  -9   -2.80    3.50
   1   5  -9   -2.70    4.20
  -1  -5   8   37.20    4.10
  -1  -5   8   37.90    5.10
  -1  -5   8   24.30    4.10
   1   5  -8   42.60    4.90
   1   5  -8   28.40    4.00
   1   5  -8   27.40    4.20
  -1  -5   7   22.50    3.90
  -1  -5   7   16.20    3.60
  -1  -5   7   19.90    4.30
   1   5  -7   13.50    4.00
   1   5  -7   11.10    3.50
   1   5  -7   18.30    3.90
  -1  -5   6  258.77   10.70
  -1  -5   6  287.87    9.40
  -1  -5   6  272.77    9.50
   1   5  -6  277.67    9.20
   1   5  -6  277.47    9.40
   1   5  -6  278.87   10.60
  -1  -5   5   58.29    5.40
  -1  -5   5   60.89    5.10
   1   5  -5   66.29    5.30
   1   5  -5   63.69    5.00
   1   5  -5   60.79    5.10
  -1  -5   4   77.29    4.90
  -1  -5   4   68.49    5.10
   1   5  -4   76.39    4.80
   1   5  -4   77.59    5.20
  -1  -5   3    3.90    2.40
  -1  -5   3    4.80    2.70
   1   5  -3   -0.10    1.00
   1   5  -3    1.80    2.60
  -1  -5   2    3.50    2.60
  -1  -5   2    4.90    2.40
   1   5  -2    3.90    2.50
  -1  -5   1   45.10    4.10
  -1  -5   1   35.70    2.90
   1   5  -1   45.90    3.90
   1   5  -1   47.80    4.10
   1   5  -1   46.40    4.40
  -1  -5   0  362.46   10.00
  -1  -5   0  358.36    9.90
   1   5   0  367.16   10.00
   1   5   0  368.96   12.10
   1   5   0  363.56    9.90
  -1  -5  -1   70.29    4.30
  -1  -5  -1   70.29    4.30
   1   5   1   61.79    4.10
   1   5   1   77.39    5.90
   1   5   1   69.19    4.20
  -1  -5  -2  504.05   13.30
  -1  -5  -2  531.55   13.40
   1   5   2  505.65   13.20
   1   5   2  522.25   15.90
   1   5   2  518.05   13.40
  -1  -5  -3    4.00    2.20
  -1  -5  -3    6.30    2.40
  -1  -5  -3    7.90    2.80
   1   5   3    4.30    2.30
   1   5   3    4.60    2.30
   1   5   3    4.10    2.60
  -1  -5  -4  184.98    6.60
  -1  -5  -4  178.98    6.60
  -1  -5  -4  198.58    8.10
   1   5   4  194.38    6.70
   1   5   4  201.38    7.80
   1   5   4  194.48    6.60
  -1  -5  -5   42.20    4.10
  -1  -5  -5   49.20    5.50
  -1  -5  -5   49.40    4.40
   1   5   5   50.19    4.50
   1   5   5   51.89    4.20
   1   5   5   67.19    5.50
   1   5   5   44.30    7.20
  -1  -5  -6  692.83   18.40
  -1  -5  -6  710.33   18.20
   1   5   6  693.53   18.20
   1   5   6  713.83   18.40
   1   5   6  738.03   31.20
   1   5   6  715.63   23.00
  -1  -5  -7   21.00    3.00
  -1  -5  -7   35.60    4.90
  -1  -5  -7   31.50    3.40
   1   5   7   30.30    3.60
   1   5   7   38.50    4.90
   1   5   7   27.30    3.20
  -1  -5  -8  412.16   12.50
  -1  -5  -8  415.26   15.90
  -1  -5  -8  426.16   12.20
   1   5   8  420.46   16.00
   1   5   8  399.66   20.20
   1   5   8  423.46   12.50
   1   5   8  426.26   12.20
  -1  -5  -9   -3.20    3.30
  -1  -5  -9   -5.80    3.00
  -1  -5  -9  -11.10    4.60
   1   5   9   -6.60    5.00
   1   5   9   -6.30    4.50
   1   5   9   -1.60    3.50
   1   5   9    4.30    3.10
  -1  -5 -10   84.09    9.20
  -1  -5 -10  105.59    7.30
  -1  -5 -10  103.69    6.40
   1   5  10  105.99    9.60
   1   5  10   98.79    6.20
   1   5  10  100.59    7.20
   1   5  10   86.19   10.30
  -1  -5 -11    2.50    3.60
  -1  -5 -11   -0.30    4.30
   1   5  11   -3.40    4.20
   1   5  11   -0.20    6.20
  -1  -5 -12   10.40    5.00
   1   5  12    8.80    4.90
   1   5  12   14.10    7.40
  -1  -5 -13   12.70    5.50
  -1  -5 -13    4.70    4.00
   1   5  13    0.30    5.20
   1   5  13    1.80    7.50
  -1  -5 -14    1.70    4.30
  -1  -5 -14   16.50    6.20
   1   5  14   -6.10    8.40
   1   5  14    7.40    5.70
  -1  -5 -15   -3.10    6.40
  -1  -5 -15   -6.50    4.60
   1   5  15    1.00    6.00
   1   5  15   13.50    8.90
  -1  -5 -16    5.80    7.10
   1   5  16   26.40   10.00
   1   5  16   15.90    6.80
  -1  -5 -17    3.30    7.50
   1   5  17    9.20   10.50
   1   5  17  -11.20    6.70
  -1  -5 -18   32.10    8.50
  -1  -5 -19    5.20    8.50
  -1  -5 -20    2.10    9.20
  -1  -4  20   -9.30    8.60
   1   4 -20    0.70    8.90
  -1  -4  19   -5.20    8.30
   1   4 -19    7.20    8.50
  -1  -4  18   -0.80    8.00
   1   4 -18    7.00    8.00
  -1  -4  17   -4.70    7.50
   1   4 -17   -3.00    7.50
  -1  -4  16    6.80    7.20
   1   4 -16    0.70    6.90
  -1  -4  15   25.10    6.90
  -1  -4  15   25.90    9.10
   1   4 -15   18.90    6.80
  -1  -4  14    8.60    7.70
  -1  -4  14    0.80    6.20
   1   4 -14   -2.90    5.90
  -1  -4  13   67.89    8.40
  -1  -4  13   60.19    6.70
   1   4 -13   53.19    6.60
  -1  -4  12    9.00    5.40
  -1  -4  12   14.30    6.40
   1   4 -12    8.90    5.10
  -1  -4  11   40.00    5.40
  -1  -4  11   46.60    6.80
   1   4 -11   47.60    6.40
   1   4 -11   57.09    5.70
  -1  -4  10   27.40    5.70
  -1  -4  10   21.60    4.40
  -1  -4  10   16.20    3.90
   1   4 -10   23.40    5.20
   1   4 -10   14.10    4.50
  -1  -4   9  505.95   14.80
  -1  -4   9  509.95   15.10
  -1  -4   9  488.15   18.00
   1   4  -9  501.85   18.10
   1   4  -9  499.85   14.90
  -1  -4   8    0.10    3.50
  -1  -4   8   -0.10    4.40
  -1  -4   8    0.90    3.20
   1   4  -8   -4.20    3.80
   1   4  -8    4.60    3.60
  -1  -4   7   23.20    3.50
  -1  -4   7   15.70    4.20
  -1  -4   7   16.80    3.60
   1   4  -7   17.30    3.30
   1   4  -7   20.10    3.60
   1   4  -7   21.90    4.00
  -1  -4   6  141.79    7.30
  -1  -4   6  142.79    6.70
   1   4  -6  144.29    7.30
   1   4  -6  135.39    6.60
   1   4  -6  110.09    5.90
  -1  -4   5  184.08    8.00
  -1  -4   5  180.68    6.80
  -1  -4   5  187.98    7.20
   1   4  -5  195.88    7.90
   1   4  -5  192.88    7.10
  -1  -4   4   38.10    3.50
  -1  -4   4   43.00    3.50
  -1  -4   4   42.10    3.30
   1   4  -4   34.90    3.20
   1   4  -4   39.00    3.00
   1   4  -4   35.40    4.30
  -1  -4   3  359.46   10.10
  -1  -4   3  351.96   10.00
   1   4  -3  350.66   11.50
   1   4  -3  365.76    9.90
   1   4  -3  354.36   10.00
  -1  -4   2    6.10    2.30
  -1  -4   2   10.40    2.60
   1   4  -2    3.70    2.30
  -1  -4   1 1091.69   26.40
  -1  -4   1 1122.69   26.50
   1   4  -1 1088.09   30.10
   1   4  -1 1080.99   26.40
  -1  -4   0    6.40    2.20
  -1  -4   0    1.50    1.80
  -1  -4   0    6.80    2.20
   1   4   0    4.80    2.20
   1   4   0    9.10    3.40
   1   4   0    6.80    2.20
  -1  -4  -1  413.26   10.80
  -1  -4  -1  378.36   12.20
  -1  -4  -1  401.66   10.60
   1   4   1  409.76   10.70
   1   4   1  406.66   10.60
   1   4   1  414.46   12.70
  -1  -4  -2   59.59    4.20
  -1  -4  -2   61.49    3.80
  -1  -4  -2   67.29    4.40
   1   4   2   57.49    4.10
   1   4   2   64.39    5.70
   1   4   2   59.69    4.10
   1   4   2   64.79    3.90
  -1  -4  -3  143.59    5.50
  -1  -4  -3  136.49    5.40
  -1  -4  -3  142.69    6.50
   1   4   3  157.08    6.20
   1   4   3  127.39    5.40
   1   4   3  148.49    5.40
  -1  -4  -4   44.60    3.90
  -1  -4  -4   58.69    5.20
  -1  -4  -4   45.70    4.10
   1   4   4   64.29    4.90
   1   4   4   53.09    3.90
   1   4   4   50.89    6.60
   1   4   4   47.60    4.00
  -1  -4  -5  269.47    8.40
  -1  -4  -5  291.97   10.60
   1   4   5  276.97    8.40
   1   4   5  283.97   10.60
   1   4   5  284.97   14.20
   1   4   5  275.17    8.60
  -1  -4  -6    7.80    2.60
  -1  -4  -6    5.50    2.50
  -1  -4  -6    0.20    2.80
   1   4   6   10.20    3.80
   1   4   6    7.70    2.70
   1   4   6    9.40    2.60
   1   4   6    1.90    4.00
  -1  -4  -7   91.59    7.30
  -1  -4  -7   93.29    5.70
  -1  -4  -7   92.29    5.50
   1   4   7   93.29    5.90
   1   4   7   90.49    5.30
   1   4   7   92.09    7.60
  -1  -4  -8   -0.50    3.20
  -1  -4  -8   -1.40    2.90
  -1  -4  -8   -2.80    4.20
   1   4   8   -3.70    2.70
   1   4   8   -0.80    4.60
   1   4   8   -0.10    3.20
  -1  -4  -9   27.00    5.50
  -1  -4  -9   24.30    3.90
  -1  -4  -9   25.30    3.60
   1   4   9   23.20    3.30
   1   4   9   23.20    5.60
   1   4   9   24.10    3.90
  -1  -4 -10   -3.70    3.20
  -1  -4 -10    8.60    4.00
  -1  -4 -10   -6.10    4.90
   1   4  10   -7.30    5.50
   1   4  10    0.60    3.90
   1   4  10   -1.90    3.10
  -1  -4 -11   -2.50    2.20
  -1  -4 -11    3.40    4.30
   1   4  11    4.10    6.10
   1   4  11    3.50    4.30
  -1  -4 -12   -1.60    3.50
  -1  -4 -12    2.30    4.70
   1   4  12   -4.80    4.60
   1   4  12    2.20    6.60
  -1  -4 -13   11.30    4.30
  -1  -4 -13    7.40    5.40
   1   4  13   14.20    5.30
   1   4  13   11.80    7.80
  -1  -4 -14    5.90    4.40
  -1  -4 -14   10.50    6.00
   1   4  14    8.40    5.60
   1   4  14    9.70    8.20
  -1  -4 -15   -6.80    4.50
  -1  -4 -15   -1.90    6.20
   1   4  15   -5.20    8.70
   1   4  15   -5.60    5.90
  -1  -4 -16   15.30    7.10
   1   4  16    5.00    6.80
   1   4  16   -2.40    9.10
  -1  -4 -17   -0.30    7.40
   1   4  17   15.00   10.50
   1   4  17   -0.90    7.00
  -1  -4 -18   12.00    8.20
   1   4  18    9.40    7.90
  -1  -4 -19    4.30    8.30
  -1  -4 -20   -7.90    9.10
  -1  -3  20   -5.20    8.50
   1   3 -20   -9.20    8.60
  -1  -3  19   12.70    8.60
   1   3 -19   -5.50    8.10
  -1  -3  18   26.50    8.40
   1   3 -18   28.10    8.30
  -1  -3  17    5.60    7.50
  -1  -3  17   14.30   10.00
   1   3 -17    8.50    7.50
  -1  -3  16    0.70    6.80
  -1  -3  16   16.10    9.50
   1   3 -16   -3.40    6.60
  -1  -3  15    3.40    6.30
  -1  -3  15   -3.10    7.90
   1   3 -15   -2.70    6.20
  -1  -3  14   62.99    7.00
  -1  -3  14   54.79    8.90
   1   3 -14   45.60    6.70
  -1  -3  13   10.10    7.00
  -1  -3  13   -9.20    5.30
   1   3 -13   -7.30    4.20
   1   3 -13    0.40    5.40
  -1  -3  12   29.20    5.30
  -1  -3  12   36.60    6.80
   1   3 -12   27.90    5.20
   1   3 -12   29.60    4.60
  -1  -3  11   40.80    5.30
  -1  -3  11   44.90    6.70
   1   3 -11   41.10    5.00
   1   3 -11   40.40    6.30
   1   3 -11   34.50    4.50
  -1  -3  10  485.95   18.60
  -1  -3  10  499.05   15.20
  -1  -3  10  502.15   14.90
   1   3 -10  515.75   14.90
   1   3 -10  513.15   18.70
   1   3 -10  511.25   15.20
  -1  -3   9    3.00    4.60
  -1  -3   9    2.00    3.70
  -1  -3   9   -1.60    3.20
   1   3  -9   -4.70    3.30
   1   3  -9    3.80    4.40
   1   3  -9    6.10    3.80
  -1  -3   8  170.88    9.30
  -1  -3   8  185.18    7.70
  -1  -3   8  176.98    7.90
   1   3  -8  167.18    9.10
   1   3  -8  174.88    7.70
   1   3  -8  177.28    7.60
  -1  -3   7  153.88    6.70
  -1  -3   7  135.59    8.00
  -1  -3   7  140.79    6.80
   1   3  -7  141.89    6.90
   1   3  -7  145.29    8.00
  -1  -3   6 2051.89   62.89
  -1  -3   6 2104.29   50.39
   1   3  -6 2100.59   50.39
   1   3  -6 2178.38   62.99
  -1  -3   5   18.10    3.40
  -1  -3   5   25.10    2.90
  -1  -3   5   19.10    3.00
   1   3  -5   13.20    2.80
   1   3  -5   14.80    2.70
   1   3  -5   20.40    3.50
  -1  -3   4  350.06   12.40
  -1  -3   4  377.76   10.50
  -1  -3   4  371.36   10.60
   1   3  -4  394.76   10.50
   1   3  -4  372.36   10.50
   1   3  -4  372.96   12.50
  -1  -3   3   99.89    5.20
  -1  -3   3  111.19    5.20
   1   3  -3  113.09    5.20
   1   3  -3  108.09    5.30
   1   3  -3  109.89    5.20
  -1  -3   2  972.50   23.30
  -1  -3   2  968.70   23.30
   1   3  -2  956.50   23.20
   1   3  -2  946.81   23.20
  -1  -3   1   56.99    3.50
  -1  -3   1   55.89    3.50
   1   3  -1   60.39    4.40
   1   3  -1   59.49    3.40
  -1  -3   0  373.76    9.60
  -1  -3   0  385.36    9.60
   1   3   0  373.36   11.20
   1   3   0  355.26    9.50
   1   3   0  384.96    9.60
  -1  -3  -1  143.09    4.80
  -1  -3  -1  147.19    4.90
   1   3   1  147.59    4.80
   1   3   1  156.88    6.30
   1   3   1  143.79    4.80
  -1  -3  -2 1301.97   31.00
  -1  -3  -2 1343.77   38.60
   1   3   2 1325.37   38.60
   1   3   2 1287.27   31.00
   1   3   2 1250.07   30.90
  -1  -3  -3   27.50    3.20
  -1  -3  -3   16.10    2.30
  -1  -3  -3   20.10    2.50
   1   3   3   14.50    2.30
   1   3   3   21.90    2.50
   1   3   3   20.10    3.80
  -1  -3  -4  676.73   21.00
  -1  -3  -4  659.73   16.70
   1   3   4  645.54   16.70
   1   3   4  671.73   16.70
   1   3   4  654.63   21.00
   1   3   4  684.43   28.30
  -1  -3  -5   -2.00    3.00
  -1  -3  -5    2.60    2.30
  -1  -3  -5   -2.50    2.20
   1   3   5   -2.90    2.30
   1   3   5   -0.10    2.30
   1   3   5   -0.40    3.30
  -1  -3  -6  589.14   15.50
  -1  -3  -6  593.84   15.60
   1   3   6  591.64   15.40
   1   3   6  607.24   19.70
   1   3   6  585.04   15.60
   1   3   6  587.14   25.60
  -1  -3  -7   25.20    4.40
  -1  -3  -7   23.00    3.30
  -1  -3  -7   28.30    3.20
   1   3   7   25.80    4.60
   1   3   7   25.40    3.40
   1   3   7   13.00    4.50
   1   3   7   24.00    3.10
  -1  -3  -8   36.50    3.60
  -1  -3  -8   34.70    5.10
  -1  -3  -8   34.00    3.80
   1   3   8   38.40    5.40
   1   3   8   31.20    3.40
   1   3   8   32.70    3.80
  -1  -3  -9   17.30    3.30
  -1  -3  -9    9.20    4.70
   1   3   9   11.70    5.20
   1   3   9   13.50    3.20
  -1  -3 -10  117.39    7.60
  -1  -3 -10   99.29    9.10
   1   3  10   99.89    7.30
   1   3  10  107.59    6.50
   1   3  10   98.39    9.60
  -1  -3 -11   -6.70    2.60
  -1  -3 -11  -11.90    4.10
   1   3  11   -5.40    5.80
   1   3  11   -0.10    4.30
  -1  -3 -12    1.50    3.60
  -1  -3 -12    5.10    4.80
   1   3  12    2.50    4.80
   1   3  12    0.90    6.50
  -1  -3 -13    2.20    4.00
  -1  -3 -13   -1.30    5.20
   1   3  13    5.80    5.20
   1   3  13    2.90    7.40
  -1  -3 -14   14.40    6.10
  -1  -3 -14    7.40    4.70
   1   3  14   16.70    8.10
   1   3  14    4.80    5.80
  -1  -3 -15   -6.50    6.30
  -1  -3 -15    1.10    4.70
   1   3  15    4.40    8.50
   1   3  15   -3.50    6.00
  -1  -3 -16    4.10    6.90
  -1  -3 -16    0.30    5.40
   1   3  16   -3.10    9.40
   1   3  16    2.10    6.60
  -1  -3 -17   12.80    7.70
   1   3  17    5.60   10.20
   1   3  17    5.70    7.30
  -1  -3 -18   77.59    9.20
   1   3  18   66.99    8.80
  -1  -3 -19  -10.20    8.10
  -1  -3 -20   -1.70    8.90
  -1  -2  20    7.60    8.70
   1   2 -20   -7.10    8.50
  -1  -2  19   72.79    9.60
   1   2 -19   77.59    9.60
  -1  -2  18    0.70   10.70
  -1  -2  18   -8.70    7.50
   1   2 -18   -2.40    7.50
  -1  -2  17   82.49    8.80
  -1  -2  17   89.09   11.60
   1   2 -17   70.29    8.40
  -1  -2  16    3.20    6.60
  -1  -2  16   -4.20    8.80
   1   2 -16   -4.40    6.50
  -1  -2  15   27.60    8.80
  -1  -2  15   25.90    6.60
   1   2 -15   15.20    6.30
  -1  -2  14   17.70    5.90
  -1  -2  14   14.00    7.70
   1   2 -14   10.80    4.80
   1   2 -14   14.50    5.80
  -1  -2  13   98.69    8.70
  -1  -2  13   94.39   10.80
   1   2 -13   97.89    8.70
   1   2 -13   92.79    7.80
  -1  -2  12   -0.30    6.00
  -1  -2  12   -2.20    4.70
   1   2 -12    0.30    4.00
   1   2 -12    4.80    4.80
  -1  -2  11  192.28    8.90
  -1  -2  11  186.98    9.10
  -1  -2  11  192.98   11.40
   1   2 -11  197.18    9.30
   1   2 -11  190.18    8.80
   1   2 -11  194.08   11.20
  -1  -2  10   -3.40    2.90
  -1  -2  10   -2.90    3.80
  -1  -2  10    2.40    4.90
   1   2 -10   -0.30    3.80
   1   2 -10   -1.50    3.40
   1   2 -10    6.50    4.60
  -1  -2   9 1413.16   35.20
  -1  -2   9 1411.96   35.10
  -1  -2   9 1384.96   44.00
   1   2  -9 1453.15   44.10
   1   2  -9 1423.36   35.10
   1   2  -9 1418.16   35.20
  -1  -2   8    2.20    4.00
  -1  -2   8    1.70    2.80
  -1  -2   8    3.00    3.20
   1   2  -8   -1.40    2.10
   1   2  -8    3.30    4.10
   1   2  -8    0.50    3.20
  -1  -2   7  629.94   16.40
  -1  -2   7  612.64   16.10
  -1  -2   7  606.94   20.20
   1   2  -7  624.24   20.30
   1   2  -7  604.34   16.30
   1   2  -7  576.24   16.00
  -1  -2   6    1.90    3.10
  -1  -2   6   -1.40    1.70
  -1  -2   6    2.20    2.60
   1   2  -6    3.40    2.40
   1   2  -6    5.30    2.80
   1   2  -6    5.60    3.40
  -1  -2   5 7935.01  238.48
  -1  -2   5 8284.47  189.88
  -1  -2   5 8208.18  189.98
   1   2  -5 8235.48  238.58
   1   2  -5 8222.58  189.88
   1   2  -5 8121.69  189.88
  -1  -2   4  189.68    6.80
  -1  -2   4  193.88    6.80
  -1  -2   4  195.98    8.00
   1   2  -4  194.38    6.70
   1   2  -4  201.78    8.10
  -1  -2   3 2948.41   68.99
  -1  -2   3 2860.81   86.39
  -1  -2   3 2951.90   68.99
   1   2  -3 2939.31   86.39
   1   2  -3 2939.81   68.99
   1   2  -3 3049.79   68.99
  -1  -2   2   71.49    3.50
  -1  -2   2   71.29    3.50
  -1  -2   2   67.19    3.30
   1   2  -2   75.99    3.50
   1   2  -2   74.09    3.40
   1   2  -2   72.99    3.50
  -1  -2   1  200.08    5.50
  -1  -2   1  200.68    5.50
   1   2  -1  196.78    5.50
   1   2  -1  202.18    5.50
  -1  -2   0   -1.30    1.10
  -1  -2   0   -0.50    1.20
  -1  -2   0    0.00    1.30
   1   2   0   -1.50    1.10
   1   2   0   -0.70    0.20
   1   2   0   -1.00    1.60
  -1  -2  -1  110.39    3.70
  -1  -2  -1  107.59    3.80
  -1  -2  -1  118.59    4.20
   1   2   1  129.59    4.10
   1   2   1  103.39    3.70
  -1  -2  -2   15.10    2.20
  -1  -2  -2   11.30    1.80
  -1  -2  -2    8.70    1.60
   1   2   2    8.70    1.70
   1   2   2   16.60    2.20
   1   2   2   11.00    2.80
   1   2   2   12.30    1.60
  -1  -2  -3  298.87    8.40
  -1  -2  -3  311.37   10.50
   1   2   3  272.97   13.90
   1   2   3  313.17   10.50
  -1  -2  -4    1.50    2.20
  -1  -2  -4    1.90    2.20
  -1  -2  -4   -1.00    3.20
   1   2   4    4.00    2.20
   1   2   4   -2.00    3.20
   1   2   4    2.00    2.30
  -1  -2  -5  996.70   25.00
  -1  -2  -5 1013.70   41.90
  -1  -2  -5 1035.10   31.50
  -1  -2  -5 1034.20   25.00
   1   2   5 1036.00   42.00
   1   2   5 1023.10   31.60
   1   2   5  999.10   25.00
   1   2   5 1039.60   25.00
  -1  -2  -6   23.30    3.10
  -1  -2  -6   28.20    3.00
   1   2   6   27.40    3.20
   1   2   6   32.40    4.20
   1   2   6   28.20    2.80
  -1  -2  -7  215.38    9.70
  -1  -2  -7  201.08    8.00
  -1  -2  -7  208.98    7.60
   1   2   7  227.88    7.70
   1   2   7  218.58   10.00
   1   2   7  207.28    7.90
  -1  -2  -8   -1.20    3.20
  -1  -2  -8   -0.80    4.00
  -1  -2  -8   -2.50    2.80
   1   2   8    0.40    4.30
   1   2   8    1.50    3.20
   1   2   8    5.00    2.90
  -1  -2  -9  263.97   12.30
  -1  -2  -9  277.77    9.70
  -1  -2  -9  259.87    9.20
   1   2   9  286.87    9.70
   1   2   9  256.97   12.30
   1   2   9  270.67    9.60
  -1  -2 -10   -0.80    2.00
  -1  -2 -10    0.50    3.70
  -1  -2 -10   -4.70    4.40
   1   2  10   -2.70    3.70
   1   2  10   -4.70    5.30
   1   2  10    1.90    3.20
  -1  -2 -11   22.00    4.60
  -1  -2 -11   16.70    3.70
   1   2  11   27.10    4.50
   1   2  11   25.80    6.30
  -1  -2 -12    1.20    4.70
  -1  -2 -12   -1.40    3.70
   1   2  12    2.20    4.50
   1   2  12   -2.40    6.10
  -1  -2 -13  127.89    8.40
  -1  -2 -13  118.79    9.20
   1   2  13  112.69   12.10
   1   2  13  131.79    9.10
  -1  -2 -14    6.30    4.60
  -1  -2 -14   -1.10    5.70
   1   2  14    7.40    7.70
   1   2  14    4.00    5.50
  -1  -2 -15   -1.20    4.90
  -1  -2 -15    5.50    6.30
   1   2  15   11.90    8.80
   1   2  15   -4.30    6.10
  -1  -2 -16   -1.90    5.30
  -1  -2 -16    4.20    6.80
   1   2  16    2.80    6.70
   1   2  16   -4.80    9.00
  -1  -2 -17  183.78   13.60
   1   2  17  209.88   13.10
  -1  -2 -18   -0.20    7.90
   1   2  18    1.60    7.60
  -1  -2 -19   32.90    9.10
   1   2  19   20.50    8.50
  -1  -2 -20   -3.50    8.90
   1   1 -21    1.70    9.10
  -1  -1  20    0.80    8.40
   1   1 -20   15.70    9.10
  -1  -1  19   -0.30    7.90
  -1  -1  19   10.10   11.10
   1   1 -19   10.50    8.40
  -1  -1  18   54.49   11.70
  -1  -1  18   43.70    8.30
   1   1 -18   37.50    8.40
  -1  -1  17   -8.40    7.00
  -1  -1  17    9.30    9.80
   1   1 -17    6.40    7.30
  -1  -1  16   16.60    6.70
  -1  -1  16   15.40    9.10
   1   1 -16    5.40    6.60
  -1  -1  15    0.40    7.90
  -1  -1  15    9.70    6.20
   1   1 -15    6.40    5.00
   1   1 -15    3.00    6.00
  -1  -1  14  241.58   14.80
  -1  -1  14  249.08   11.80
   1   1 -14  252.77   11.00
   1   1 -14  249.88   11.50
  -1  -1  13    5.50    5.20
  -1  -1  13    7.60    6.80
   1   1 -13    1.40    5.00
   1   1 -13    7.50    4.30
  -1  -1  12    1.60    4.60
  -1  -1  12   19.60    6.50
   1   1 -12    6.10    4.10
   1   1 -12   13.30    4.70
  -1  -1  11    1.10    5.60
  -1  -1  11    4.80    4.10
   1   1 -11    7.70    5.10
   1   1 -11    3.40    4.10
   1   1 -11    6.60    3.60
  -1  -1  10  207.48    9.00
  -1  -1  10  227.68   11.40
   1   1 -10  235.08   11.40
   1   1 -10  213.28    8.80
   1   1 -10  218.08    9.10
  -1  -1   9   66.29    7.40
  -1  -1   9   48.20    4.30
   1   1  -9   64.29    7.40
   1   1  -9   47.90    4.40
  -1  -1   7    2.50    2.90
  -1  -1   7   -0.80    0.90
  -1  -1   7   -0.10    3.70
   1   1  -7    2.10    2.70
   1   1  -7    2.40    2.50
   1   1  -7    1.60    3.60
  -1  -1   6  533.65   18.10
  -1  -1   6  556.94   14.50
   1   1  -6  550.84   14.40
   1   1  -6  559.44   18.10
   1   1  -6  529.05   14.40
  -1  -1   5  128.19    5.70
  -1  -1   5  138.79    7.00
   1   1  -5  147.19    7.10
   1   1  -5  130.79    5.80
   1   1  -5  126.19    5.70
  -1  -1   4 1031.90   25.60
  -1  -1   4 1076.49   25.70
  -1  -1   4 1064.89   32.20
   1   1  -4 1060.69   25.70
   1   1  -4 1062.29   25.70
   1   1  -4 1091.49   32.30
  -1  -1   3   -1.00    1.70
  -1  -1   3   -2.10    1.70
  -1  -1   3   -0.20    2.00
   1   1  -3   -0.40    2.10
   1   1  -3    0.50    1.70
  -1  -1   2 1199.68   28.30
  -1  -1   2 1197.38   28.30
  -1  -1   2 1208.28   35.50
   1   1  -2 1213.08   28.40
   1   1  -2 1207.78   35.50
   1   1  -2 1191.28   28.30
  -1  -1   1    9.70    1.00
  -1  -1   1   10.00    0.90
  -1  -1   1    5.00    0.80
   1   1  -1    5.20    0.80
   1   1  -1    8.60    1.00
   1   1  -1    8.80    1.00
  -1  -1   0    0.50    0.70
  -1  -1   0    1.80    0.70
  -1  -1   0    2.80    0.80
  -1  -1   0    0.10    0.40
   1   1   0    1.20    0.60
   1   1   0    1.10    0.70
   1   1   0    1.00    1.00
   1   1   0    0.10    0.40
  -1  -1  -1   -0.10    0.90
  -1  -1  -1   -0.60    1.10
  -1  -1  -1   -0.50    0.80
  -1  -1  -1   -0.40    1.40
   1   1   1   -1.30    1.30
   1   1   1    0.10    0.80
   1   1   1   -0.50    0.30
  -1  -1  -2 1508.85   43.40
  -1  -1  -2 1443.76   58.69
  -1  -1  -2 1497.95   34.60
  -1  -1  -2 1444.66   34.50
   1   1   2 1432.86   34.50
   1   1   2 1479.75   43.40
   1   1   2 1468.25   58.69
  -1  -1  -3   94.99    4.20
  -1  -1  -3   99.79    6.40
  -1  -1  -3   99.99    4.20
  -1  -1  -3   96.79    5.20
   1   1   3   90.69    5.20
   1   1   3   75.49    6.40
   1   1   3   93.19    4.20
  -1  -1  -4  290.77    8.50
  -1  -1  -4  300.57   10.80
  -1  -1  -4  281.77   13.50
  -1  -1  -4  297.47    8.50
   1   1   4  295.47    8.60
   1   1   4  295.67   10.80
  -1  -1  -5   58.69    4.30
  -1  -1  -5   54.69    4.60
  -1  -1  -5   46.60    5.10
   1   1   5   51.79    4.50
   1   1   5   51.99    5.80
  -1  -1  -6   98.59    5.20
  -1  -1  -6   93.79    5.50
   1   1   6   99.79    5.30
   1   1   6   89.89    6.80
  -1  -1  -7    7.70    3.10
  -1  -1  -7    3.50    2.60
  -1  -1  -7    2.00    3.50
   1   1   7    5.20    4.00
   1   1   7    4.00    2.90
   1   1   7    2.80    1.90
  -1  -1  -9   -1.10    1.90
  -1  -1  -9    4.10    4.00
  -1  -1  -9    8.20    3.70
   1   1   9   11.20    2.90
   1   1   9    4.10    4.90
   1   1   9   11.20    3.70
  -1  -1 -10   29.90    5.00
  -1  -1 -10   24.10    3.70
  -1  -1 -10   35.60    4.60
   1   1  10   28.60    3.60
   1   1  10   32.60    4.40
   1   1  10   30.70    5.80
  -1  -1 -11    0.60    4.30
  -1  -1 -11    4.70    3.60
   1   1  11    0.70    4.30
   1   1  11    2.60    5.70
  -1  -1 -12    1.00    4.70
  -1  -1 -12   -1.50    3.70
   1   1  12    9.50    6.30
   1   1  12   11.60    4.80
  -1  -1 -13    1.30    4.10
  -1  -1 -13   -1.90    5.10
   1   1  13    3.80    6.80
   1   1  13    0.00    5.10
  -1  -1 -14  107.99    9.70
  -1  -1 -14  120.79    8.60
   1   1  14  122.39    9.70
   1   1  14   84.89    9.50
  -1  -1 -15    5.30    5.10
  -1  -1 -15   10.20    6.20
   1   1  15    6.20    6.10
   1   1  15    7.50    8.20
  -1  -1 -16   44.90    7.40
   1   1  16   49.70   10.50
   1   1  16   42.70    7.20
  -1  -1 -17   12.90    7.40
   1   1  17    9.00    7.20
  -1  -1 -18   69.79    8.90
   1   1  18   56.99    8.70
  -1  -1 -19    4.30    8.50
   1   1  19   -7.70    8.40
  -1  -1 -20   -0.10    8.90
   1   1  20   -0.80    8.80
   1   0 -21    2.40    9.10
  -1   0  20   -1.50    8.40
   1   0 -20  -10.70    8.40
  -1   0  19   -3.10   10.80
  -1   0  19   -1.40    7.80
   1   0 -19  -11.30    7.80
  -1   0  18   -7.60    7.30
  -1   0  18   22.60   10.60
   1   0 -18    3.20    7.80
  -1   0  17    3.10    7.00
  -1   0  17    9.40    9.90
   1   0 -17    7.70    7.30
  -1   0  16    8.80    9.10
  -1   0  16   -6.50    6.40
   1   0 -16   -1.00    6.50
   1   0 -16    3.40    5.50
  -1   0  15   -4.30    5.70
  -1   0  15    1.90    8.20
   1   0 -15    0.30    5.90
   1   0 -15    2.20    4.80
  -1   0  14   30.70    5.90
  -1   0  14   36.70    8.20
   1   0 -14   32.90    5.90
   1   0 -14   25.00    4.90
  -1   0  13    2.80    6.80
  -1   0  13    1.30    4.90
   1   0 -13    3.00    4.10
   1   0 -13    2.50    4.80
  -1   0  12   -0.70    4.50
  -1   0  12   10.60    6.30
   1   0 -12    1.30    4.50
   1   0 -12    4.00    4.00
  -1   0  11    7.10    5.60
  -1   0  11    0.30    3.10
  -1   0  11    1.20    4.00
   1   0 -11    2.60    4.00
   1   0 -11    0.30    3.40
   1   0 -11    1.20    4.60
  -1   0  10   -5.10    3.70
  -1   0  10    1.30    4.50
  -1   0  10   -2.20    3.10
   1   0 -10   -4.30    3.70
   1   0 -10    0.30    4.30
   1   0 -10   -3.40    2.20
  -1   0   9    8.20    3.10
  -1   0   9   17.40    4.60
  -1   0   9   10.90    3.60
   1   0  -9    7.70    3.20
   1   0  -9   11.50    3.70
  -1   0   8   24.70    3.70
  -1   0   8   26.20    4.80
  -1   0   8   23.40    3.20
   1   0  -8   26.90    4.40
   1   0  -8   21.50    3.20
   1   0  -8   28.10    3.60
  -1   0   6    3.80    2.60
  -1   0   6    2.50    3.50
  -1   0   6    3.60    1.90
   1   0  -6    4.20    2.50
   1   0  -6    1.60    2.10
   1   0  -6   -1.10    2.50
  -1   0   5    2.50    2.00
  -1   0   5    1.30    2.40
  -1   0   5    7.40    3.20
   1   0  -5    0.80    2.40
   1   0  -5    4.60    2.40
   1   0  -5    2.70    2.00
  -1   0   4    5.30    2.20
  -1   0   4   10.40    2.90
  -1   0   4    6.20    1.70
   1   0  -4    3.80    2.10
   1   0  -4    9.70    2.20
   1   0  -4    0.30    1.30
  -1   0   3   -1.50    2.00
  -1   0   3    0.80    1.50
  -1   0   3   -0.40    1.00
   1   0  -3    0.50    1.50
   1   0  -3   -0.10    1.50
   1   0  -3   -2.30    0.60
  -1   0   2   17.80    2.10
  -1   0   2   17.80    1.20
   1   0  -2   15.40    1.10
   1   0  -2   17.40    1.20
  -1   0   1   -0.30    0.30
  -1   0   1   -0.20    0.20
   1   0  -1   -0.10    0.30
   1   0  -1    0.00    0.50
  -1   0   0   -7.40    0.10
  -1   0   0   -7.40    0.10
  -1   0   0   -7.30    0.10
   1   0   0   -7.30    0.10
   1   0   0   -7.20    0.40
   1   0   0   -7.50    0.40
  -1   0  -1   -0.10    0.90
  -1   0  -1   -1.10    0.60
  -1   0  -1    0.30    0.80
   1   0   1    0.10    0.80
   1   0   1    0.00    1.00
   1   0   1   -0.60    0.60
  -1   0  -2  160.78    7.70
  -1   0  -2  170.58    4.90
  -1   0  -2  171.98    4.90
   1   0   2  169.38    4.80
   1   0   2  162.98    7.70
   1   0   2  175.08    4.90
  -1   0  -3    5.20    1.90
  -1   0  -3    2.60    1.60
  -1   0  -3    4.90    1.90
   1   0   3    7.10    2.50
   1   0   3    3.00    2.00
   1   0   3    2.30    1.80
   1   0   3   -0.50    2.20
  -1   0  -4  225.88    7.10
  -1   0  -4  227.78    7.10
   1   0   4  208.58    9.00
   1   0   4  217.88    7.10
   1   0   4  225.18    7.00
  -1   0  -5   -3.50    2.40
  -1   0  -5    1.20    2.40
  -1   0  -5    0.20    0.60
   1   0   5   -0.80    3.40
   1   0   5   -0.30    1.20
   1   0   5   -0.70    2.60
  -1   0  -6   81.09    4.90
  -1   0  -6   70.99    5.00
   1   0   6   69.49    5.10
   1   0   6   69.79    6.30
  -1   0  -7   11.70    3.10
   1   0   7    9.00    4.20
   1   0   7   15.00    3.20
  -1   0  -8    0.40    1.70
  -1   0  -8   -3.60    2.10
  -1   0  -8    5.90    3.30
   1   0   8    7.40    4.40
   1   0   8    2.90    2.30
   1   0   8    7.30    3.40
  -1   0  -9   12.80    3.70
  -1   0  -9    6.40    3.00
  -1   0  -9    3.30    2.30
   1   0   9    1.40    1.90
   1   0   9   14.10    5.00
   1   0   9    7.40    3.70
  -1   0 -10   23.40    3.80
  -1   0 -10   15.90    3.60
  -1   0 -10   29.50    4.30
   1   0  10   31.00    5.80
   1   0  10   33.90    4.50
  -1   0 -11    1.00    4.10
  -1   0 -11   -1.40    3.40
   1   0  11    1.30    4.20
   1   0  11   -1.20    5.50
  -1   0 -12   -0.50    3.90
  -1   0 -12    3.90    4.80
   1   0  12    7.00    6.20
   1   0  12    0.50    4.70
  -1   0 -13    8.70    5.30
  -1   0 -13    5.20    4.20
   1   0  13    0.90    6.50
   1   0  13    6.70    5.20
  -1   0 -14    2.40    4.70
  -1   0 -14   -0.80    5.70
   1   0  14    2.80    5.80
   1   0  14    3.20    7.50
  -1   0 -15   -0.50    6.30
   1   0  15    0.70    8.30
   1   0  15   -6.60    6.00
  -1   0 -16   11.10    7.00
   1   0  16    6.90    6.80
  -1   0 -17    5.10    7.30
   1   0  17  -11.40    6.90
  -1   0 -18   14.10    8.00
   1   0  18   19.80    7.90
  -1   0 -19   -4.60    8.00
   1   0  19   -2.80    8.00
  -1   0 -20    0.90    9.10
   1   0  20  -10.00    8.60
   1  -1 -21    4.10    9.20
  -1   1  20    7.90   12.20
   1  -1 -20   -7.60    8.40
  -1   1  19   -3.30    7.70
  -1   1  19    7.30   11.30
   1  -1 -19   11.60    8.10
  -1   1  18   59.49   11.40
  -1   1  18   33.10    7.80
   1  -1 -18   48.60    8.40
  -1   1  17   12.30   10.00
  -1   1  17    3.50    6.90
   1  -1 -17   -1.70    7.00
  -1   1  16    2.10    6.30
  -1   1  16   21.20    9.20
   1  -1 -16    7.30    5.10
   1  -1 -16   11.40    6.80
  -1   1  15   -6.70    5.60
  -1   1  15   -2.30    8.40
   1  -1 -15    9.70    4.80
   1  -1 -15    4.90    6.00
  -1   1  14  256.27   11.50
  -1   1  14  224.88   14.60
   1  -1 -14  264.67   11.60
   1  -1 -14  247.48   10.70
  -1   1  13    5.70    4.90
  -1   1  13    6.70    7.00
   1  -1 -13    8.50    5.00
   1  -1 -13    0.70    4.10
  -1   1  12    7.90    4.50
  -1   1  12   13.80    6.10
   1  -1 -12    9.60    3.80
   1  -1 -12    9.10    4.40
  -1   1  11    2.00    3.40
  -1   1  11    2.80    4.00
  -1   1  11    6.00    5.40
   1  -1 -11    2.60    4.00
   1  -1 -11   -1.40    1.90
   1  -1 -11   -0.20    2.40
  -1   1  10  236.88    8.80
  -1   1  10  228.68    8.90
  -1   1  10  221.28   11.20
   1  -1 -10  191.08    8.10
   1  -1 -10  229.48    8.90
  -1   1   9   38.80    4.00
  -1   1   9   48.10    4.30
  -1   1   9   66.29    7.60
   1  -1  -9   36.50    4.40
   1  -1  -9   44.90    4.20
   1  -1  -9   44.30    3.90
  -1   1   7    5.50    3.80
  -1   1   7   -4.70    2.70
  -1   1   7   -2.20    2.50
   1  -1  -7    2.10    2.10
   1  -1  -7   -3.10    2.40
   1  -1  -7   -3.20    2.60
  -1   1   6  516.65   13.90
  -1   1   6  549.54   14.00
  -1   1   6  532.65   17.90
   1  -1  -6  562.14   14.00
   1  -1  -6  523.85   14.00
  -1   1   5  133.39    6.80
  -1   1   5  128.09    5.20
  -1   1   5  111.99    5.10
   1  -1  -5  132.19    5.20
   1  -1  -5  123.99    6.20
   1  -1  -5  121.59    5.20
  -1   1   4 1056.69   25.60
  -1   1   4 1077.19   32.50
  -1   1   4 1087.09   25.70
   1  -1  -4 1046.80   25.60
   1  -1  -4 1095.59   32.60
   1  -1  -4 1073.19   25.60
  -1   1   3   -0.50    2.20
  -1   1   3    0.60    1.40
  -1   1   3   -2.60    1.30
   1  -1  -3   -1.10    1.40
   1  -1  -3   -1.20    1.40
   1  -1  -3   -0.70    2.30
  -1   1   2 1165.18   28.10
  -1   1   2 1201.68   28.10
  -1   1   2 1224.78   35.70
   1  -1  -2 1249.88   35.70
   1  -1  -2 1185.08   28.10
  -1   1   0    0.30    0.80
  -1   1   0    1.40    0.50
   1  -1   0    0.30    0.40
   1  -1   0    1.80    0.50
  -1   1  -1   -0.40    1.40
  -1   1  -1   -0.10    0.50
  -1   1  -1   -1.20    0.80
   1  -1   1    0.60    0.80
   1  -1   1   -0.80    1.40
   1  -1   1   -0.20    0.90
  -1   1  -2 1508.95   34.70
  -1   1  -2 1468.05   34.70
  -1   1  -2 1451.45   58.89
   1  -1   2 1484.65   34.70
   1  -1   2 1454.75   58.89
   1  -1   2 1472.35   34.70
  -1   1  -3   93.39    5.30
  -1   1  -3   93.39    6.30
  -1   1  -3   96.79    4.40
  -1   1  -3   99.49    4.40
   1  -1   3  101.69    4.40
   1  -1   3  102.09    6.30
   1  -1   3   97.09    4.50
  -1   1  -4  307.87   10.90
  -1   1  -4  296.37    8.60
  -1   1  -4  295.37    8.70
   1  -1   4  284.37   10.70
   1  -1   4  295.47    8.70
   1  -1   4  284.37    8.70
  -1   1  -5   69.49    4.90
  -1   1  -5   59.29    4.60
  -1   1  -5   66.69    4.80
   1  -1   5   60.99    4.80
   1  -1   5   51.89    5.90
   1  -1   5   61.59    4.40
  -1   1  -6   95.99    6.60
  -1   1  -6   98.09    5.70
  -1   1  -6   92.29    5.00
   1  -1   6   88.19    6.80
   1  -1   6   98.49    5.40
  -1   1  -7   -1.20    3.00
  -1   1  -7    1.50    2.50
  -1   1  -7    3.50    3.70
   1  -1   7   -0.70    3.70
   1  -1   7    4.50    2.70
   1  -1   7    3.80    3.20
  -1   1  -9    6.70    4.50
  -1   1  -9    5.70    3.70
  -1   1  -9    7.00    3.20
   1  -1   9    9.70    3.90
   1  -1   9    9.60    4.70
   1  -1   9    5.40    3.30
  -1   1 -10   34.10    4.00
  -1   1 -10   31.50    4.50
  -1   1 -10   32.20    5.40
   1  -1  10   31.90    5.70
   1  -1  10   35.80    4.20
   1  -1  10   24.60    4.40
  -1   1 -11    7.00    3.90
  -1   1 -11    3.70    4.30
   1  -1  11    3.20    4.40
   1  -1  11    5.30    5.80
  -1   1 -12    4.90    4.70
  -1   1 -12    0.60    4.10
   1  -1  12    4.10    5.80
   1  -1  12    8.30    4.80
  -1   1 -13    0.80    4.40
  -1   1 -13    7.00    5.20
   1  -1  13   -3.50    5.30
   1  -1  13    0.90    6.80
  -1   1 -14   89.79    7.60
  -1   1 -14  113.09    9.40
   1  -1  14  116.99    9.80
   1  -1  14  102.99   12.20
  -1   1 -15    8.30    6.40
   1  -1  15    3.20    6.30
  -1   1 -16   41.60    7.60
   1  -1  16   50.29    7.60
  -1   1 -17   -1.00    7.60
   1  -1  17    6.10    7.20
  -1   1 -18   78.79    9.20
   1  -1  18   58.89    8.90
  -1   1 -19    1.00    8.20
   1  -1  19   -2.00    8.10
  -1   1 -20    1.00    8.70
   1  -1  20   -3.10    8.60
  -1   2  20   -8.30   11.20
   1  -2 -20    6.40    9.20
  -1   2  19   70.79   12.60
  -1   2  19   70.69    9.00
   1  -2 -19   92.59    9.90
  -1   2  18   -0.90   10.20
  -1   2  18   -9.40    6.80
   1  -2 -18   -3.10    7.30
  -1   2  17   69.79    8.10
  -1   2  17   78.19   11.30
   1  -2 -17   76.39    8.40
  -1   2  16   -0.80    6.10
  -1   2  16   -1.30    8.70
   1  -2 -16   -4.90    6.30
   1  -2 -16   -7.80    4.90
  -1   2  15    9.60    8.30
  -1   2  15   22.80    6.10
   1  -2 -15   20.60    6.40
   1  -2 -15   21.80    5.10
  -1   2  14   16.20    7.70
  -1   2  14   13.50    5.40
   1  -2 -14   11.10    5.60
   1  -2 -14   15.90    4.70
  -1   2  13   86.29    9.40
  -1   2  13  103.29    8.30
   1  -2 -13   99.49    8.50
   1  -2 -13  106.49    7.50
  -1   2  12    0.40    4.30
  -1   2  12   -1.30    5.80
   1  -2 -12   -1.20    4.40
   1  -2 -12    0.60    2.90
  -1   2  11  179.68   11.10
  -1   2  11  189.18    8.30
  -1   2  11  196.58    8.70
   1  -2 -11  186.68    8.60
   1  -2 -11  178.38   10.80
  -1   2  10   -0.10    3.20
  -1   2  10   -6.20    3.50
  -1   2  10   -0.40    5.00
   1  -2 -10   -7.80    3.60
   1  -2 -10    1.90    4.40
   1  -2 -10   -1.10    3.00
  -1   2   9 1439.96   34.40
  -1   2   9 1385.86   43.70
  -1   2   9 1394.56   34.40
   1  -2  -9 1407.26   34.40
   1  -2  -9 1411.56   34.30
   1  -2  -9 1365.86   43.60
  -1   2   8    5.40    3.00
  -1   2   8    1.00    2.80
  -1   2   8    2.10    4.20
   1  -2  -8    4.20    2.70
   1  -2  -8    5.30    3.00
   1  -2  -8    3.70    3.80
  -1   2   7  615.74   20.30
  -1   2   7  595.14   15.80
  -1   2   7  606.04   15.80
   1  -2  -7  628.54   20.20
   1  -2  -7  585.04   15.80
   1  -2  -7  607.54   15.80
  -1   2   6    2.20    2.30
  -1   2   6    0.10    2.30
  -1   2   6    4.20    3.50
   1  -2  -6    2.70    2.40
   1  -2  -6    4.10    2.20
   1  -2  -6    3.70    2.40
  -1   2   5 8078.49  186.28
  -1   2   5 8029.30  186.28
  -1   2   5 7949.20  234.58
   1  -2  -5 8234.28  234.58
   1  -2  -5 7729.13  186.28
   1  -2  -5 8145.29  186.28
  -1   2   4  198.28    6.00
  -1   2   4  193.18    6.00
  -1   2   4  195.08    8.20
   1  -2  -4  194.18    6.00
   1  -2  -4  206.68    8.50
   1  -2  -4  199.68    6.10
  -1   2   3 2958.60   87.99
   1  -2  -3 3037.80   88.09
  -1   2   2   74.79    3.80
   1  -2  -2   75.29    4.10
  -1   2   0   -0.60    0.80
  -1   2   0   -0.50    1.40
   1  -2   0   -0.70    0.90
   1  -2   0    0.30    1.60
   1  -2   0   -1.10    0.90
  -1   2  -1  116.19    3.80
   1  -2   1  121.19    3.80
   1  -2   1  120.69    3.70
  -1   2  -2   13.10    1.80
  -1   2  -2   12.50    1.80
   1  -2   2   10.70    1.80
   1  -2   2   13.00    1.90
  -1   2  -3  286.97    8.30
  -1   2  -3  305.57   10.20
  -1   2  -3  258.97   13.40
  -1   2  -3  298.47    8.40
   1  -2   3  293.27    8.40
   1  -2   3  279.67    8.30
  -1   2  -4   -1.50    2.50
  -1   2  -4    1.40    2.60
  -1   2  -4   -0.20    3.40
  -1   2  -4   -7.90    3.20
   1  -2   4    3.00    2.60
   1  -2   4    4.80    2.60
  -1   2  -5 1037.90   31.70
  -1   2  -5 1040.50   25.30
  -1   2  -5 1002.90   42.10
  -1   2  -5 1013.10   25.30
   1  -2   5 1038.70   25.40
   1  -2   5 1040.20   25.40
  -1   2  -6   30.20    4.30
  -1   2  -6   26.40    3.20
  -1   2  -6   32.20    3.10
   1  -2   6   27.00    4.00
   1  -2   6   28.80    3.20
  -1   2  -7  235.48    8.40
  -1   2  -7  216.58   10.20
   1  -2   7  202.88    9.90
   1  -2   7  235.38    8.20
   1  -2   7  240.88    8.40
  -1   2  -8   -7.10    3.90
  -1   2  -8    4.30    3.60
  -1   2  -8   -1.80    3.20
   1  -2   8   -4.50    4.00
   1  -2   8   -3.60    3.00
   1  -2   8   -2.10    3.50
  -1   2  -9  283.07   10.00
  -1   2  -9  275.87   10.10
  -1   2  -9  271.17   12.20
   1  -2   9  261.27   12.10
   1  -2   9  275.87    9.80
   1  -2   9  274.97   10.20
  -1   2 -10    3.30    3.50
  -1   2 -10   -0.30    4.00
  -1   2 -10    0.40    4.70
   1  -2  10   -3.80    4.70
   1  -2  10    2.80    4.00
   1  -2  10    0.30    3.40
  -1   2 -11   21.90    4.30
  -1   2 -11   27.70    4.80
   1  -2  11   22.50    6.00
   1  -2  11   27.80    5.00
  -1   2 -12    5.20    4.10
  -1   2 -12    2.90    4.80
   1  -2  12    1.50    6.20
   1  -2  12    4.00    5.00
  -1   2 -13  111.79    9.60
  -1   2 -13  118.89    8.80
   1  -2  13  112.49    9.80
  -1   2 -14   -1.30    5.80
   1  -2  14   -7.10    5.80
  -1   2 -15    2.40    6.30
   1  -2  15   -5.60    6.30
  -1   2 -16   -1.60    6.80
   1  -2  16    4.50    6.90
  -1   2 -17  173.58   13.30
   1  -2  17  192.58   13.30
  -1   2 -18    5.70    8.00
   1  -2  18   -1.50    7.90
  -1   2 -19   35.00    9.10
   1  -2  19   11.20    8.60
  -1   2 -20   -2.40    8.90
   1  -2  20    5.50    9.10
  -1   3  20    9.30   11.90
   1  -3 -20   -2.20    8.60
  -1   3  19    4.60   10.70
   1  -3 -19   -1.80    8.10
  -1   3  18   26.20   10.80
  -1   3  18   31.10    7.70
   1  -3 -18   42.10    8.20
  -1   3  17   10.80    7.10
  -1   3  17    7.80    9.60
   1  -3 -17   19.90    7.50
  -1   3  16    7.20    9.10
  -1   3  16    1.50    6.10
   1  -3 -16    4.10    5.20
   1  -3 -16    4.10    6.60
  -1   3  15   -0.90    5.50
  -1   3  15    1.30    8.60
   1  -3 -15    5.40    4.70
   1  -3 -15    2.90    6.00
  -1   3  14   51.59    9.10
  -1   3  14   57.99    6.10
   1  -3 -14   53.29    5.40
   1  -3 -14   62.19    6.40
  -1   3  13   -4.70    4.50
  -1   3  13   -2.40    6.70
   1  -3 -13   -1.50    3.50
   1  -3 -13    2.90    4.90
  -1   3  12   26.40    4.70
  -1   3  12   26.80    6.80
   1  -3 -12   11.60    2.90
   1  -3 -12   25.10    4.80
  -1   3  11   43.40    4.60
  -1   3  11   33.70    6.10
  -1   3  11   34.20    4.10
   1  -3 -11   36.90    3.90
   1  -3 -11   40.30    4.70
  -1   3  10  514.65   14.30
  -1   3  10  490.35   14.30
  -1   3  10  484.65   18.80
   1  -3 -10  499.35   14.10
   1  -3 -10  496.35   18.60
   1  -3 -10  506.65   14.50
  -1   3   9    5.90    4.70
  -1   3   9    3.20    3.00
  -1   3   9    5.20    3.30
   1  -3  -9    5.40    3.30
   1  -3  -9    2.40    2.90
   1  -3  -9   -2.10    4.40
  -1   3   8  178.98    9.40
  -1   3   8  164.68    6.90
  -1   3   8  170.78    6.80
   1  -3  -8  162.78    6.60
   1  -3  -8  171.78    7.00
   1  -3  -8  176.88    9.40
  -1   3   7  147.19    5.90
  -1   3   7  136.39    8.20
  -1   3   7  135.59    5.90
   1  -3  -7  138.29    6.00
   1  -3  -7  144.29    5.80
   1  -3  -7  142.69    8.10
  -1   3   6 2105.89   48.80
  -1   3   6 2048.99   61.79
  -1   3   6 2026.00   48.80
   1  -3  -6 2053.19   48.80
   1  -3  -6 2087.69   48.80
  -1   3   5   18.00    2.20
  -1   3   5   17.30    3.60
  -1   3   5   16.90    2.30
   1  -3  -5   24.70    3.70
   1  -3  -5   17.00    2.40
   1  -3  -5   18.30    2.30
  -1   3   4  379.26   12.40
  -1   3   4  337.97    9.30
  -1   3   4  364.56    9.30
   1  -3  -4  335.27    9.30
   1  -3  -4  375.66   12.50
  -1   3   3  109.09    5.80
   1  -3  -3  122.09    6.20
  -1   3   2  974.80   29.20
  -1   3   1   56.39    4.40
   1  -3  -1   65.59    4.50
  -1   3   0  380.06    9.50
  -1   3   0  382.96   11.30
  -1   3   0  384.16    9.50
   1  -3   0  379.56    9.50
   1  -3   0  386.26   11.40
  -1   3  -1  151.28    4.80
   1  -3   1  149.29    4.90
   1  -3   1  159.28    6.20
   1  -3   1  149.29    4.90
  -1   3  -2 1327.57   31.80
   1  -3   2 1337.47   31.80
   1  -3   2 1340.57   31.80
  -1   3  -3   25.20    3.30
  -1   3  -3   25.40    2.90
  -1   3  -3   26.40    2.50
   1  -3   3   26.10    2.60
   1  -3   3   25.10    2.80
  -1   3  -4  704.93   21.60
  -1   3  -4  683.43   17.40
  -1   3  -4  679.63   17.30
  -1   3  -4  669.93   29.00
   1  -3   4  680.13   17.50
   1  -3   4  690.13   17.40
  -1   3  -5   -1.30    3.50
  -1   3  -5   -0.40    2.20
  -1   3  -5    0.60    2.80
  -1   3  -5    1.10    3.20
   1  -3   5    1.60    2.40
   1  -3   5   -0.70    2.60
  -1   3  -6  603.84   20.10
  -1   3  -6  610.34   16.30
  -1   3  -6  606.84   26.30
   1  -3   6  616.14   16.30
  -1   3  -7   20.70    3.50
  -1   3  -7   26.70    4.50
  -1   3  -7   30.40    3.40
   1  -3   7   28.70    3.50
   1  -3   7   25.90    3.70
  -1   3  -8   37.30    3.90
  -1   3  -8   30.70    4.20
  -1   3  -8   32.50    5.10
   1  -3   8   36.60    4.20
   1  -3   8   34.20    3.80
  -1   3  -9   15.40    4.10
  -1   3  -9   13.50    3.60
  -1   3  -9   12.30    4.90
   1  -3   9   16.10    3.80
   1  -3   9   17.80    4.10
  -1   3 -10  117.89    7.40
  -1   3 -10  103.49    8.80
  -1   3 -10  105.59    7.70
   1  -3  10  110.29    7.20
   1  -3  10  105.59    7.80
  -1   3 -11    0.00    4.40
  -1   3 -11   -1.20    3.90
   1  -3  11   -0.60    4.50
  -1   3 -12    1.60    4.20
  -1   3 -12    5.70    5.00
   1  -3  12    3.70    5.20
  -1   3 -13  -13.10    5.40
   1  -3  13  -12.30    5.40
  -1   3 -14    4.90    6.10
   1  -3  14   11.50    6.30
  -1   3 -15   -0.90    6.40
   1  -3  15    1.70    6.60
  -1   3 -16    5.30    6.90
   1  -3  16    2.30    7.10
  -1   3 -17    1.80    7.60
   1  -3  17   -3.50    7.50
  -1   3 -18   83.19    9.60
   1  -3  18   69.69    9.40
  -1   3 -19    4.10    8.60
   1  -3  19    6.90    8.50
  -1   3 -20   -2.80    9.30
   1  -3  20   -5.70    8.70
  -1   4  20   12.20   12.40
   1  -4 -20    2.20    8.80
  -1   4  19    1.90   11.20
   1  -4 -19    7.80    8.10
  -1   4  18   18.10   11.10
  -1   4  18   -0.90    7.70
   1  -4 -18    7.70    7.70
  -1   4  17   -4.50    6.50
  -1   4  17    3.90    9.70
   1  -4 -17    1.00    7.20
  -1   4  16    1.70    9.10
  -1   4  16   -7.40    6.10
   1  -4 -16    1.50    6.60
  -1   4  15   27.90    6.20
  -1   4  15   29.10    9.00
   1  -4 -15   22.70    5.00
   1  -4 -15   36.80    6.60
  -1   4  14    0.10    5.30
  -1   4  14   -2.60    8.10
   1  -4 -14    1.00    4.10
   1  -4 -14    8.40    5.70
  -1   4  13   69.09    8.60
  -1   4  13   61.89    6.00
   1  -4 -13   65.79    6.20
  -1   4  12   21.90    6.80
  -1   4  12    7.60    4.50
   1  -4 -12    7.50    3.60
   1  -4 -12    6.60    4.70
  -1   4  11   54.29    7.20
  -1   4  11   44.00    4.20
  -1   4  11   47.70    4.80
   1  -4 -11   51.79    4.90
   1  -4 -11   47.40    4.20
  -1   4  10   22.20    3.90
  -1   4  10   19.60    3.40
  -1   4  10   14.20    5.80
   1  -4 -10   18.60    4.00
   1  -4 -10    8.30    5.30
   1  -4 -10   19.90    3.40
  -1   4   9  506.25   14.00
  -1   4   9  479.95   18.40
  -1   4   9  517.15   14.20
   1  -4  -9  506.65   13.90
   1  -4  -9  511.15   14.30
   1  -4  -9  520.05   18.70
  -1   4   8    4.50    2.90
  -1   4   8   -2.80    4.30
  -1   4   8    0.40    2.60
   1  -4  -8   -2.80    4.20
   1  -4  -8    2.70    2.80
   1  -4  -8   -0.90    2.90
  -1   4   7   17.00    2.80
  -1   4   7   14.50    2.60
  -1   4   7   25.00    4.60
   1  -4  -7   11.70    2.80
   1  -4  -7   19.30    4.40
   1  -4  -7   18.90    2.70
  -1   4   6  140.39    7.60
  -1   4   6  141.99    5.50
  -1   4   6  140.39    5.30
   1  -4  -6  128.39    5.40
   1  -4  -6  135.89    5.20
  -1   4   5  196.38    8.30
  -1   4   5  180.58    6.00
  -1   4   5  190.88    5.90
   1  -4  -5  173.48    6.00
   1  -4  -5  201.38    8.50
  -1   4   4   40.10    4.60
   1  -4  -4   42.50    4.10
  -1   4   3  352.56   11.90
   1  -4  -3  362.06   12.20
  -1   4   2    4.40    3.30
  -1   4   2    1.30    2.40
  -1   4   1 1063.59   29.60
   1  -4  -1 1091.59   29.60
  -1   4   0    6.80    1.90
  -1   4   0    7.70    3.20
  -1   4   0    8.00    2.00
   1  -4   0    7.40    2.00
   1  -4   0    9.40    3.40
   1  -4   0    7.40    1.90
  -1   4  -1  433.06   11.20
  -1   4  -1  434.56   13.20
  -1   4  -1  425.66   11.20
   1  -4   1  431.06   11.20
   1  -4   1  426.56   11.20
   1  -4   1  428.76   13.30
  -1   4  -2   71.29    4.20
  -1   4  -2   62.49    3.70
   1  -4   2   62.79    4.30
   1  -4   2   68.19    4.30
   1  -4   2   68.49    5.30
  -1   4  -3  151.78    6.00
   1  -4   3  150.48    6.00
   1  -4   3  152.08    5.90
  -1   4  -4   58.49    4.70
  -1   4  -4   60.69    5.20
   1  -4   4   56.19    4.60
   1  -4   4   56.59    4.70
  -1   4  -5  287.87    9.10
  -1   4  -5  290.27   10.90
   1  -4   5  287.27    9.30
   1  -4   5  283.17    8.90
  -1   4  -6   10.00    3.70
  -1   4  -6    7.30    4.50
  -1   4  -6    9.80    3.10
  -1   4  -6    9.30    2.80
   1  -4   6    1.40    2.30
   1  -4   6    6.80    3.10
  -1   4  -7   90.89    7.20
  -1   4  -7   90.19    6.40
  -1   4  -7   99.29    6.00
  -1   4  -7  100.39    8.90
   1  -4   7   95.49    6.50
   1  -4   7   93.19    5.90
  -1   4  -8   -5.60    4.20
  -1   4  -8   -2.30    3.00
  -1   4  -8   -3.40    3.70
   1  -4   8   -0.90    3.10
   1  -4   8    0.70    3.70
  -1   4  -9   21.40    5.00
  -1   4  -9   18.90    4.20
  -1   4  -9   22.30    3.80
   1  -4   9   15.00    3.60
   1  -4   9   22.40    4.30
  -1   4 -10    2.70    3.70
  -1   4 -10    0.20    4.30
  -1   4 -10   -4.10    4.60
   1  -4  10   -1.80    3.40
   1  -4  10    5.70    4.30
  -1   4 -11    6.20    4.80
  -1   4 -11    3.80    4.00
   1  -4  11    4.00    4.90
  -1   4 -12   -0.40    5.30
   1  -4  12   -5.00    5.20
  -1   4 -13   -0.60    5.60
   1  -4  13    1.10    5.90
  -1   4 -14   11.30    6.40
   1  -4  14    6.80    6.40
  -1   4 -15    3.30    6.60
   1  -4  15   -3.60    6.60
  -1   4 -16    7.50    7.20
   1  -4  16    0.90    7.40
  -1   4 -17   16.10    8.00
   1  -4  17   -1.50    7.80
  -1   4 -18   19.00    8.40
   1  -4  18   14.80    8.40
  -1   4 -19   -3.10    8.70
   1  -4  19   -1.10    8.60
  -1   4 -20    4.50    9.40
   1  -4  20    6.40    9.40
  -1   5  20   -0.90   11.80
   1  -5 -20    5.10    8.70
  -1   5  19    7.50   11.10
   1  -5 -19    0.50    7.90
  -1   5  18   24.20   11.10
   1  -5 -18   25.40    8.20
  -1   5  17   -9.90    6.60
  -1   5  17   -4.70   10.00
   1  -5 -17    0.60    7.10
  -1   5  16   -4.50    6.10
  -1   5  16   -1.20    9.50
   1  -5 -16   -2.80    6.50
  -1   5  15    5.30    8.70
  -1   5  15    2.50    5.70
   1  -5 -15   -2.80    6.00
   1  -5 -15   -0.90    4.40
  -1   5  14  183.48   10.00
  -1   5  14  144.19   14.00
   1  -5 -14  197.18   10.60
  -1   5  13    5.50    7.50
  -1   5  13    7.50    4.90
   1  -5 -13   -1.60    3.80
   1  -5 -13   -1.90    5.00
  -1   5  12   65.19    8.00
  -1   5  12   84.39    7.40
   1  -5 -12   85.29    7.70
   1  -5 -12   71.09    6.40
  -1   5  11    4.90    6.10
  -1   5  11    0.70    3.50
  -1   5  11    3.70    4.00
   1  -5 -11    7.20    4.10
   1  -5 -11    0.10    3.30
  -1   5  10  159.48    7.10
  -1   5  10  159.18    7.50
  -1   5  10  146.29   10.40
   1  -5 -10  160.18    7.70
   1  -5 -10  146.79    6.80
   1  -5 -10  150.38   10.10
  -1   5   9   -2.60    2.80
  -1   5   9   -0.10    3.20
  -1   5   9   -5.80    4.80
   1  -5  -9    1.60    3.30
   1  -5  -9   -2.50    2.80
   1  -5  -9   -4.50    4.50
  -1   5   8   37.30    5.30
  -1   5   8   32.10    3.00
  -1   5   8   36.30    3.50
   1  -5  -8   34.60    3.40
   1  -5  -8   53.39    4.60
   1  -5  -8   33.90    5.20
  -1   5   7   18.80    2.60
  -1   5   7   17.60    2.90
  -1   5   7   24.70    4.60
   1  -5  -7   17.60    4.50
   1  -5  -7   17.40    2.80
   1  -5  -7   22.00    2.80
  -1   5   6  275.27   10.80
  -1   5   6  260.87    8.10
  -1   5   6  274.27    7.90
   1  -5  -6  265.27    7.90
  -1   5   5   74.89    5.60
   1  -5  -5   59.39    5.90
  -1   5   4   71.69    5.20
   1  -5  -4   80.49    5.70
  -1   5   3   -0.70    2.60
  -1   5   2    4.60    3.50
  -1   5   2    0.80    2.40
  -1   5   1   44.20    3.20
  -1   5   1   42.90    3.20
  -1   5   1   42.60    4.40
   1  -5  -1   46.60    3.20
   1  -5  -1   43.00    3.20
   1  -5  -1   40.80    4.10
  -1   5   0  374.86    9.80
  -1   5   0  382.76   12.20
  -1   5   0  378.06    9.80
   1  -5   0  376.96   12.00
   1  -5   0  360.66    9.80
   1  -5   0  370.56    9.90
  -1   5  -1   73.79    4.20
  -1   5  -1   77.49    6.30
  -1   5  -1   68.49    4.20
   1  -5   1   74.59    4.10
   1  -5   1   75.19    5.50
   1  -5   1   71.39    4.30
  -1   5  -2  539.05   13.80
  -1   5  -2  527.35   13.80
   1  -5   2  521.35   13.80
   1  -5   2  552.34   13.90
   1  -5   2  525.05   15.90
  -1   5  -3    8.30    2.60
   1  -5   3    9.20    2.70
   1  -5   3    7.00    2.60
  -1   5  -4  202.38    8.40
  -1   5  -4  199.48    7.40
   1  -5   4  201.38    7.30
   1  -5   4  214.68    7.30
  -1   5  -5   49.20    4.40
  -1   5  -5   59.09    5.30
  -1   5  -5   57.89    4.70
   1  -5   5   57.09    5.40
   1  -5   5   40.60    3.50
  -1   5  -6  716.33   19.10
  -1   5  -6  730.33   18.90
  -1   5  -6  719.43   23.10
   1  -5   6  708.43   19.00
   1  -5   6  712.43   18.90
  -1   5  -7   29.20    4.10
  -1   5  -7   32.60    4.60
  -1   5  -7   33.80    3.70
  -1   5  -7   28.90    5.70
   1  -5   7   35.60    4.00
   1  -5   7   32.90    3.90
  -1   5  -8  422.86   13.10
  -1   5  -8  422.46   13.40
  -1   5  -8  428.56   16.00
  -1   5  -8  420.06   20.80
   1  -5   8  440.76   13.50
   1  -5   8  437.36   13.20
  -1   5  -9   -4.70    4.10
  -1   5  -9   -0.20    5.20
  -1   5  -9   -2.40    4.50
  -1   5  -9   -0.10    3.40
   1  -5   9   -2.60    4.00
   1  -5   9    3.40    3.60
  -1   5 -10  108.89    7.50
  -1   5 -10   95.29    8.10
  -1   5 -10  101.39    8.80
   1  -5  10  107.79    8.10
   1  -5  10  102.79    7.60
  -1   5 -11    2.20    4.90
   1  -5  11    2.30    4.90
  -1   5 -12    8.40    5.50
   1  -5  12    8.30    5.50
  -1   5 -13    4.30    5.90
   1  -5  13   -1.60    6.00
  -1   5 -14    6.60    6.60
   1  -5  14   12.60    6.60
  -1   5 -15   -6.20    6.70
   1  -5  15   -0.10    6.90
  -1   5 -16   12.60    7.60
   1  -5  16    6.40    7.40
  -1   5 -17   -3.40    7.70
   1  -5  17    0.20    8.10
  -1   5 -18   27.00    8.80
   1  -5  18   30.10    8.90
  -1   5 -19    6.80    8.90
   1  -5  19    4.00    9.10
  -1   5 -20   -6.60    9.40
   1  -5  20    5.70    9.70
  -1   6  20    4.20   12.10
   1  -6 -20   16.00    8.80
  -1   6  19   99.99   13.90
   1  -6 -19  103.39   10.20
  -1   6  18    1.30   10.80
   1  -6 -18   -0.20    7.60
  -1   6  17   13.90   10.90
   1  -6 -17    7.60    7.30
  -1   6  16   14.50    6.40
  -1   6  16    6.50    9.60
   1  -6 -16   10.40    6.80
  -1   6  15   33.40    9.50
  -1   6  15   23.30    6.10
   1  -6 -15   21.00    6.50
  -1   6  14   -3.80    8.50
  -1   6  14   -1.60    5.10
   1  -6 -14   -2.70    5.60
   1  -6 -14   -1.00    4.00
  -1   6  13    6.90    4.90
  -1   6  13   11.30    7.70
   1  -6 -13   15.20    5.40
   1  -6 -13   12.70    4.10
  -1   6  12   -4.60    6.60
  -1   6  12   -4.30    4.30
   1  -6 -12   -6.80    4.50
   1  -6 -12   -5.50    3.50
  -1   6  11  226.48   13.00
  -1   6  11  246.68    9.40
   1  -6 -11  219.48    8.60
   1  -6 -11  227.28    9.60
  -1   6  10    0.00    3.10
  -1   6  10    5.40    5.00
  -1   6  10   -1.80    3.60
  -1   6  10   13.10    5.80
   1  -6 -10   -1.90    3.20
   1  -6 -10    3.90    5.30
   1  -6 -10   -2.70    3.80
  -1   6   9  261.77    9.00
  -1   6   9  259.17   14.30
  -1   6   9  255.77    8.50
  -1   6   9  243.18   12.10
   1  -6  -9  255.37    8.50
   1  -6  -9  255.87   12.30
  -1   6   8   68.39    7.50
  -1   6   8   66.99    5.30
  -1   6   8   67.59    4.80
   1  -6  -8   62.19    4.90
   1  -6  -8   63.69    6.50
   1  -6  -8   71.39    4.90
  -1   6   7  505.95   17.30
  -1   6   7  483.35   12.90
  -1   6   7  472.25   13.10
   1  -6  -7  489.85   17.60
   1  -6  -7  476.35   12.80
  -1   6   6    4.90    3.60
   1  -6  -6   -3.10    3.80
  -1   6   5  221.78    8.80
   1  -6  -5  188.58    8.90
  -1   6   4    5.20    3.10
   1  -6  -4   11.00    3.30
  -1   6   3  363.56   12.40
  -1   6   3  333.97   11.80
  -1   6   2   66.59    6.20
  -1   6   2   71.29    4.60
  -1   6   1  162.78    5.50
  -1   6   1  159.58    8.00
  -1   6   1  162.28    5.40
   1  -6  -1  161.78    5.50
   1  -6  -1  159.58    5.30
  -1   6   0   17.90    2.30
  -1   6   0   16.40    2.30
  -1   6   0   18.80    4.00
   1  -6   0   15.80    2.40
   1  -6   0   16.50    2.30
  -1   6  -1  220.48    7.30
  -1   6  -1  234.58    7.20
  -1   6  -1  230.58    9.40
   1  -6   1  231.38    7.30
  -1   6  -2   79.09    4.70
  -1   6  -2   88.39    4.90
   1  -6   2   93.69    5.00
   1  -6   2   92.09    5.00
  -1   6  -3  161.38    6.40
  -1   6  -3  156.98    6.20
   1  -6   3  165.48    6.50
   1  -6   3  157.68    6.50
   1  -6   3  152.48    7.40
  -1   6  -4   74.69    5.50
  -1   6  -4   65.09    5.30
   1  -6   4   71.49    5.10
   1  -6   4   66.79    5.40
  -1   6  -5   39.60    4.00
  -1   6  -5   37.10    3.40
  -1   6  -5   46.50    5.50
   1  -6   5   38.60    3.90
  -1   6  -6    0.50    3.50
  -1   6  -6    4.80    3.50
   1  -6   6   -0.30    3.50
   1  -6   6    3.10    3.20
  -1   6  -7  507.75   24.20
  -1   6  -7  517.35   17.80
  -1   6  -7  506.45   15.00
   1  -6   7  519.75   14.90
   1  -6   7  513.45   15.00
  -1   6  -8   53.79    7.10
  -1   6  -8   49.10    4.90
  -1   6  -8   60.59    7.20
  -1   6  -8   49.90    4.50
   1  -6   8   56.19    5.00
   1  -6   8   58.99    4.90
  -1   6  -9   91.99    6.90
  -1   6  -9   79.39   10.50
  -1   6  -9   79.29    8.00
  -1   6  -9   93.29    7.90
   1  -6   9   85.79    7.70
   1  -6   9   85.39    7.20
  -1   6 -10   27.50    5.50
  -1   6 -10   37.50    5.50
  -1   6 -10   31.30    6.60
   1  -6  10   22.00    4.50
   1  -6  10   27.50    5.40
  -1   6 -11  132.19    9.40
   1  -6  11  132.59    9.40
  -1   6 -12   25.30    6.20
   1  -6  12   28.00    6.20
  -1   6 -13  106.39   10.20
   1  -6  13   82.39    7.80
  -1   6 -14   -1.80    6.40
   1  -6  14   -7.40    6.40
  -1   6 -15   -8.00    6.80
   1  -6  15   -2.50    7.10
  -1   6 -16   -0.10    7.40
   1  -6  16   -3.80    7.40
  -1   6 -17   35.50    8.60
   1  -6  17   22.10    8.50
  -1   6 -18   -9.70    8.30
   1  -6  18  -16.30    8.30
  -1   6 -19   49.80   10.00
   1  -6  19   38.30    9.90
  -1   7  19    2.30   11.60
   1  -7 -19    2.40    8.50
  -1   7  18  104.39   13.70
   1  -7 -18  135.09   12.70
  -1   7  17   25.10   11.10
   1  -7 -17   20.40    7.80
  -1   7  16   14.10   10.10
   1  -7 -16    1.60    7.00
  -1   7  15    1.30    9.00
  -1   7  15   -7.20    5.50
   1  -7 -15   -9.20    6.40
  -1   7  14   16.20    9.00
  -1   7  14   20.80    5.50
   1  -7 -14    8.50    4.50
   1  -7 -14   17.90    6.20
  -1   7  13   -9.60    7.70
  -1   7  13   -7.90    4.80
   1  -7 -13   -3.50    4.00
   1  -7 -13   -4.60    5.20
  -1   7  12   56.59    8.20
  -1   7  12   48.70    5.40
   1  -7 -12   48.40    5.50
   1  -7 -12   38.50    4.40
  -1   7  11   -5.10    5.50
  -1   7  11   10.40    6.60
  -1   7  11    3.50    4.10
   1  -7 -11    0.70    3.60
   1  -7 -11    0.50    4.00
  -1   7  10  197.08    8.30
  -1   7  10  192.18   13.10
  -1   7  10  190.58   11.50
  -1   7  10  180.58    7.60
   1  -7 -10  189.38    7.60
   1  -7 -10  195.58    8.50
   1  -7 -10  193.68   11.60
  -1   7   9    8.70    2.90
  -1   7   9   16.30    5.30
  -1   7   9    7.90    3.40
   1  -7  -9    5.40    5.30
   1  -7  -9    4.10    3.10
   1  -7  -9    3.10    3.40
  -1   7   8    8.10    4.60
  -1   7   8    1.40    2.90
   1  -7  -8    5.80    4.80
   1  -7  -8    4.30    2.70
  -1   7   7   18.50    4.40
   1  -7  -7   18.30    4.70
  -1   7   6   30.00    4.40
   1  -7  -6   35.10    4.80
  -1   7   5   -5.00    3.50
   1  -7  -5   -0.60    2.80
  -1   7   4  188.18    9.30
  -1   7   4  176.88    8.00
  -1   7   3   54.29    5.60
  -1   7   3   55.79    5.00
  -1   7   2  290.87    8.00
  -1   7   2  284.77   10.90
   1  -7  -2  258.97    8.00
  -1   7   1    8.30    2.40
  -1   7   1    7.60    2.30
  -1   7   1   12.50    4.50
   1  -7  -1   11.30    2.40
   1  -7  -1    8.00    2.30
   1  -7  -1   10.40    4.00
  -1   7   0   10.60    2.40
  -1   7   0   13.30    2.50
  -1   7   0   16.50    4.40
   1  -7   0   11.70    2.40
   1  -7   0   13.00    4.00
   1  -7   0   11.80    2.50
  -1   7  -1   38.60    5.00
  -1   7  -1   34.20    3.20
  -1   7  -1   26.50    2.80
   1  -7   1   29.80    4.30
   1  -7   1   29.60    3.00
  -1   7  -2  244.18    8.00
  -1   7  -2  239.28    8.10
   1  -7   2  242.48    8.10
   1  -7   2  249.08   10.00
   1  -7   2  237.88    8.00
  -1   7  -3    0.70    2.70
  -1   7  -3    1.10    2.90
   1  -7   3    3.10    3.90
   1  -7   3    0.60    2.90
   1  -7   3    6.10    3.00
  -1   7  -4  403.96   11.90
  -1   7  -4  380.26   11.60
  -1   7  -4  398.46   13.50
   1  -7   4  409.06   11.70
   1  -7   4  399.76   13.70
   1  -7   4  385.56   11.80
  -1   7  -5   -0.10    0.70
  -1   7  -5    2.90    3.30
  -1   7  -5   -2.70    3.40
   1  -7   5    0.70    2.20
   1  -7   5    4.40    3.40
  -1   7  -6   72.69    6.30
  -1   7  -6   75.59    5.70
  -1   7  -6   59.69    4.90
   1  -7   6   73.79    6.30
   1  -7   6   69.99    6.20
  -1   7  -7   34.10    4.70
  -1   7  -7   24.50    3.90
  -1   7  -7   37.90    4.70
   1  -7   7   30.00    4.20
   1  -7   7   35.20    4.60
  -1   7  -8    9.70    4.30
  -1   7  -8   10.80    6.50
  -1   7  -8    9.70    4.60
  -1   7  -8   22.40    3.90
   1  -7   8   10.30    4.00
   1  -7   8   11.20    4.60
  -1   7  -9   33.20    5.50
  -1   7  -9   32.90    5.30
  -1   7  -9   23.50    7.20
   1  -7   9   32.70    5.10
   1  -7   9   35.20    4.90
  -1   7 -10  235.48   16.00
  -1   7 -10  249.68   11.10
  -1   7 -10  243.98   12.30
   1  -7  10  255.17   11.10
  -1   7 -11    0.90    5.50
  -1   7 -11   -2.10    6.80
   1  -7  11    0.00    5.50
  -1   7 -12   38.80    6.60
   1  -7  12   43.20    6.80
  -1   7 -13   -7.70    6.20
   1  -7  13   -4.70    6.40
  -1   7 -14   56.19    7.80
   1  -7  14   55.19    7.80
  -1   7 -15   -4.90    6.90
   1  -7  15   -6.30    7.20
  -1   7 -16   -5.20    7.60
   1  -7  16  -11.00    7.70
  -1   7 -17   -2.90    8.00
   1  -7  17    6.30    8.40
  -1   7 -18   26.00    9.20
   1  -7  18   26.80    9.50
  -1   7 -19    1.00    9.20
   1  -7  19    5.70    9.30
  -1   8  19    0.20   11.60
   1  -8 -19   -1.90    8.60
  -1   8  18   17.20   11.40
   1  -8 -18    3.50    7.90
  -1   8  17   -9.10   10.40
   1  -8 -17   -2.00    7.20
  -1   8  16   -1.10    9.90
   1  -8 -16    2.90    7.00
  -1   8  15    9.70    9.50
   1  -8 -15   -3.50    6.40
  -1   8  14  -10.90    5.40
  -1   8  14   -2.40    8.60
   1  -8 -14  -11.70    6.00
  -1   8  13    9.80    8.10
  -1   8  13  -11.90    6.20
  -1   8  13   -8.50    5.00
   1  -8 -13    6.00    5.60
   1  -8 -13    2.10    4.00
  -1   8  12  -11.70    6.20
  -1   8  12    5.20    7.20
  -1   8  12   -2.90    4.50
   1  -8 -12    3.00    5.10
   1  -8 -12    3.20    3.90
  -1   8  11   95.39    7.50
  -1   8  11   96.69   11.50
  -1   8  11  107.59   10.80
   1  -8 -11   97.39    8.00
   1  -8 -11   83.89    6.40
  -1   8  10    9.20    5.30
  -1   8  10    5.90    3.10
  -1   8  10    0.80    3.80
  -1   8  10   21.50    6.30
   1  -8 -10    3.00    3.40
   1  -8 -10    7.80    4.10
   1  -8 -10    5.70    6.00
  -1   8   9   13.70    3.10
  -1   8   9   17.80    3.70
  -1   8   9   31.30    5.80
   1  -8  -9   22.40    5.80
   1  -8  -9   21.70    3.40
   1  -8  -9   20.10    3.90
  -1   8   8   22.20    5.10
   1  -8  -8    2.40    5.20
  -1   8   7    5.70    4.40
   1  -8  -7   -0.10    4.30
  -1   8   6   -5.20    3.80
   1  -8  -6    8.60    4.00
  -1   8   5  112.49    7.10
  -1   8   5  129.39    9.00
  -1   8   4    1.50    3.50
  -1   8   4    9.90    5.10
  -1   8   3  645.64   20.30
  -1   8   2  162.38    6.00
  -1   8   2  159.08    6.00
  -1   8   2  156.08    9.10
   1  -8  -2  158.68    6.10
   1  -8  -2  165.28    6.10
  -1   8   1  208.98   10.10
  -1   8   1  216.88    7.10
  -1   8   1  207.28    7.10
   1  -8  -1  223.48    9.90
   1  -8  -1  205.08    7.10
   1  -8  -1  208.48    7.20
  -1   8   0    6.90    4.70
  -1   8   0   -4.40    2.70
  -1   8   0   -5.40    2.50
   1  -8   0   -3.80    2.70
   1  -8   0   -4.70    4.10
   1  -8   0   -2.70    2.60
  -1   8  -1  185.88    9.80
  -1   8  -1  189.88    7.10
  -1   8  -1  193.88    7.30
   1  -8   1  188.78    9.50
   1  -8   1  193.48    7.10
  -1   8  -2    2.60    2.70
  -1   8  -2    2.40    3.20
   1  -8   2   -0.80    4.30
   1  -8   2    2.80    3.00
   1  -8   2    0.40    3.20
  -1   8  -3    0.10    3.20
  -1   8  -3   -0.50    2.90
   1  -8   3    2.70    3.00
   1  -8   3   -0.70    3.20
   1  -8   3   -1.50    4.10
  -1   8  -4   -2.10    3.50
  -1   8  -4    2.10    3.00
   1  -8   4    5.70    3.10
   1  -8   4    4.20    3.50
   1  -8   4   -1.20    4.20
  -1   8  -5   25.40    4.20
  -1   8  -5   17.60    2.90
  -1   8  -5   20.40    3.70
   1  -8   5   17.90    4.00
   1  -8   5   12.00    4.40
   1  -8   5    9.70    3.20
  -1   8  -6    2.30    1.80
  -1   8  -6   12.50    4.20
  -1   8  -6   10.60    3.70
   1  -8   6    6.70    3.90
   1  -8   6    9.60    3.70
  -1   8  -7   39.60    5.00
  -1   8  -7   45.50    5.00
  -1   8  -7   39.60    4.20
   1  -8   7   41.10    4.60
   1  -8   7   40.40    4.90
  -1   8  -8    7.60    4.70
  -1   8  -8   11.60    4.70
   1  -8   8   11.40    4.60
   1  -8   8   12.90    4.30
  -1   8  -9   87.39   12.50
  -1   8  -9  104.19    8.50
  -1   8  -9   90.59    8.70
   1  -8   9  100.09    8.20
   1  -8   9  101.99    8.50
  -1   8 -10   15.30    5.40
  -1   8 -10   15.80    5.70
  -1   8 -10   21.30    7.60
   1  -8  10   13.70    5.50
  -1   8 -11   38.10    8.60
  -1   8 -11   45.00    6.60
   1  -8  11   41.30    6.50
  -1   8 -12   -2.10    7.80
  -1   8 -12    0.10    6.00
   1  -8  12   -1.40    6.20
  -1   8 -13   14.30    6.70
   1  -8  13    5.10    6.60
  -1   8 -14    7.20    7.00
   1  -8  14    0.30    7.10
  -1   8 -15    3.30    7.40
   1  -8  15    3.80    7.50
  -1   8 -16    3.90    8.00
   1  -8  16   -5.40    8.00
  -1   8 -17   -4.20    7.90
   1  -8  17   -1.50    8.50
  -1   8 -18   -4.80    8.70
   1  -8  18   -3.60    9.00
  -1   9  18   53.09   12.80
   1  -9 -18   61.89    9.20
  -1   9  17   13.60   10.80
   1  -9 -17   -1.30    7.50
  -1   9  16    4.00   10.10
   1  -9 -16    8.40    7.30
  -1   9  15   42.00   10.50
   1  -9 -15   45.70    7.60
  -1   9  14   41.20    9.60
   1  -9 -14   45.60    7.10
  -1   9  13  -13.30    6.80
  -1   9  13   -4.30    4.90
  -1   9  13    8.00    8.30
   1  -9 -13  -11.60    5.60
  -1   9  12    1.70    7.00
  -1   9  12    8.10    4.70
  -1   9  12   12.30    7.60
   1  -9 -12    6.70    4.00
   1  -9 -12    7.50    5.20
  -1   9  11   15.80    7.00
  -1   9  11   17.20    6.60
  -1   9  11   13.30    4.40
   1  -9 -11   13.70    3.90
   1  -9 -11   15.70    4.90
  -1   9  10  261.37   12.90
  -1   9  10  222.98   15.40
   1  -9 -10  212.98    8.40
  -1   9   9   25.30    5.90
   1  -9  -9   13.90    5.60
  -1   9   8  200.38   10.60
   1  -9  -8  206.38   11.00
  -1   9   7    1.50    4.40
   1  -9  -7   -3.20    4.40
  -1   9   6   20.50    5.70
  -1   9   6    6.20    4.30
  -1   9   5   13.90    5.80
  -1   9   5   10.20    4.10
  -1   9   4   88.29    8.40
  -1   9   4   67.99    6.20
  -1   9   3   27.80    5.50
  -1   9   3   14.70    2.80
  -1   9   2   94.49    5.20
  -1   9   2   99.19    8.60
  -1   9   2   94.79    5.30
   1  -9  -2   91.89    5.40
   1  -9  -2   93.09    5.30
  -1   9   1   17.10    5.40
  -1   9   1   16.00    3.00
   1  -9  -1   14.40    3.20
   1  -9  -1   12.50    2.80
   1  -9  -1   13.00    4.80
  -1   9   0  190.48    7.10
  -1   9   0  198.58    7.10
  -1   9   0  193.68   10.20
   1  -9   0  178.58    7.00
   1  -9   0  165.98    6.90
   1  -9   0  184.78    9.80
  -1   9  -1    4.00    2.80
  -1   9  -1    4.10    5.20
  -1   9  -1    7.10    3.20
   1  -9   1    0.30    4.60
   1  -9   1    6.20    3.20
  -1   9  -2  381.76   11.50
  -1   9  -2  396.86   11.70
   1  -9   2  390.36   14.20
   1  -9   2  378.06   11.60
   1  -9   2  379.86   11.60
  -1   9  -3   49.50    4.30
  -1   9  -3   39.50    3.90
   1  -9   3   45.80    5.40
   1  -9   3   51.09    4.20
   1  -9   3   44.00    4.20
  -1   9  -4  154.98    7.40
  -1   9  -4  144.49    7.60
   1  -9   4  157.28    8.80
   1  -9   4  142.29    7.60
  -1   9  -5   -6.80    3.90
  -1   9  -5   -0.50    3.20
  -1   9  -5   -1.30    3.40
   1  -9   5    1.10    3.90
   1  -9   5   -3.00    4.40
   1  -9   5    3.80    3.50
  -1   9  -6  166.88    8.30
  -1   9  -6  164.28    8.70
   1  -9   6  179.28    8.40
   1  -9   6  157.98    8.60
   1  -9   6  156.78    9.50
  -1   9  -7    9.50    4.30
  -1   9  -7   10.50    4.70
   1  -9   7   12.90    4.70
   1  -9   7   11.90    4.30
  -1   9  -8   26.20    5.00
  -1   9  -8   23.00    5.30
   1  -9   8   20.20    5.30
   1  -9   8   20.90    4.80
  -1   9  -9   17.60    5.20
  -1   9  -9   25.00    8.20
  -1   9  -9   18.40    5.40
   1  -9   9   23.60    4.90
   1  -9   9   21.90    5.60
  -1   9 -10  177.78   10.70
  -1   9 -10  165.28   10.80
  -1   9 -10  175.88   15.60
   1  -9  10  169.08   10.50
  -1   9 -11    6.40    6.10
  -1   9 -11   10.40    8.30
   1  -9  11    0.70    6.20
  -1   9 -12  -14.30    6.20
  -1   9 -12    3.00    8.20
   1  -9  12   -6.70    6.50
  -1   9 -13    2.80    6.80
  -1   9 -13   -8.70    8.40
   1  -9  13    0.10    6.80
  -1   9 -14   75.59    8.70
   1  -9  14   68.99    8.60
  -1   9 -15   30.40    8.30
   1  -9  15   33.70    8.40
  -1   9 -16   11.60    8.20
   1  -9  16   -4.70    8.40
  -1   9 -17   -1.30    8.20
   1  -9  17   -7.30    8.30
  -1   9 -18   20.60    9.50
   1  -9  18   34.00   10.00
  -1  10  18    2.80   11.50
   1 -10 -18   -2.10    8.20
  -1  10  17   70.89   12.40
   1 -10 -17   74.29    9.00
  -1  10  16   33.40   10.70
   1 -10 -16   15.90    7.40
  -1  10  15  108.19   12.30
   1 -10 -15  131.09   10.60
  -1  10  14    8.70    9.20
   1 -10 -14  -14.10    6.30
  -1  10  13  126.19   13.00
   1 -10 -13  113.89    9.30
  -1  10  12   35.70    8.20
  -1  10  12   26.20    5.00
   1 -10 -12   16.10    4.30
  -1  10  11   72.29    8.50
  -1  10  10   10.80    6.60
  -1  10  10    5.20    6.20
  -1  10   9  202.58   11.40
   1 -10  -9  187.08   11.70
  -1  10   8   44.40    6.30
  -1  10   7  462.25   16.90
  -1  10   7  457.95   17.60
  -1  10   6    8.20    6.20
  -1  10   6    4.00    4.50
  -1  10   5   44.90    6.80
  -1  10   5   41.20    5.00
  -1  10   4   29.50    6.10
  -1  10   3   95.19    5.40
  -1  10   3  109.09    9.50
  -1  10   2    5.50    2.80
  -1  10   2   11.70    3.10
  -1  10   2   14.60    5.70
   1 -10  -2    9.90    2.90
   1 -10  -2   10.80    3.20
  -1  10   1   22.70    3.20
  -1  10   1   24.90    3.40
  -1  10   1   20.90    5.80
   1 -10  -1   24.90    3.50
   1 -10  -1   18.00    3.10
   1 -10  -1   15.40    5.10
  -1  10   0   31.70    6.10
  -1  10   0   29.60    3.50
  -1  10   0   19.10    3.20
   1 -10   0   33.20    5.60
   1 -10   0   17.00    3.10
   1 -10   0   26.00    3.60
  -1  10  -1  129.19    6.80
  -1  10  -1  138.39    9.70
  -1  10  -1  131.39    6.60
   1 -10   1  136.49    9.00
   1 -10   1  129.49    6.70
  -1  10  -2   21.80    3.90
  -1  10  -2   15.90    3.50
   1 -10   2   17.60    3.70
   1 -10   2   19.80    3.90
   1 -10   2   21.70    5.00
  -1  10  -3   24.30    4.20
  -1  10  -3   22.70    3.60
   1 -10   3   21.20    3.80
   1 -10   3   28.30    5.40
   1 -10   3   27.30    4.30
  -1  10  -4    7.80    3.40
  -1  10  -4   11.70    4.10
   1 -10   4    9.10    4.10
   1 -10   4    8.70    5.00
   1 -10   4    1.00    2.40
  -1  10  -5  322.07   11.40
   1 -10   5  300.57   11.00
   1 -10   5  304.17   11.20
  -1  10  -6    9.20    4.00
  -1  10  -6   12.40    4.80
   1 -10   6    6.10    4.10
   1 -10   6    2.30    4.50
  -1  10  -7   78.19    6.40
  -1  10  -7   79.29    7.40
   1 -10   7   68.39    6.10
   1 -10   7  101.19    7.90
  -1  10  -8   43.70    5.60
  -1  10  -8   44.00    6.00
   1 -10   8   41.70    5.90
   1 -10   8   45.50    5.40
  -1  10  -9   38.30    5.80
  -1  10  -9   39.50    6.40
   1 -10   9   45.60    6.60
   1 -10   9   41.90    6.20
  -1  10 -10    6.90    8.90
  -1  10 -10    2.10    5.90
  -1  10 -10    6.80    5.40
   1 -10  10   -0.40    5.90
  -1  10 -11    6.10    9.00
  -1  10 -11    4.20    6.50
   1 -10  11    2.70    6.50
  -1  10 -12    6.60    9.20
  -1  10 -12    0.10    6.90
   1 -10  12    5.60    6.80
  -1  10 -13  128.99   11.70
  -1  10 -13  130.19   16.40
   1 -10  13  128.19   11.90
  -1  10 -14   -8.10    7.30
  -1  10 -14   -7.00    9.30
   1 -10  14   -8.90    7.60
  -1  10 -15   27.80    8.40
   1 -10  15   33.90    8.70
  -1  10 -16   14.00    8.30
   1 -10  16    2.30    8.50
  -1  10 -17   38.50    9.50
   1 -10  17   40.80   10.00
  -1  11  17   18.00   11.30
   1 -11 -17   17.30    8.00
  -1  11  16   13.70   10.60
  -1  11  15    9.70    9.70
  -1  11  14   46.00   10.10
  -1  11  13   21.50    9.10
  -1  11  12    5.20    7.80
  -1  11  11   22.10    7.50
  -1  11  10   61.89    7.80
  -1  11   9   28.20    8.00
  -1  11   9   24.60    6.80
  -1  11   8    7.60    5.70
  -1  11   8    4.50    7.20
  -1  11   7   -7.80    5.00
  -1  11   7    0.80    6.90
  -1  11   6  240.78   13.10
  -1  11   6  214.78   10.50
  -1  11   5   49.80    5.40
  -1  11   5   58.69    7.50
  -1  11   4   49.90    7.30
  -1  11   3    7.40    6.20
  -1  11   3   -6.10    3.30
  -1  11   3   -3.00    3.00
   1 -11  -3   -2.90    2.80
  -1  11   2   71.69    5.70
  -1  11   2   70.69    5.70
  -1  11   2  102.19    9.70
   1 -11  -2   69.19    5.90
   1 -11  -2   66.89    5.70
  -1  11   1   44.90    6.80
  -1  11   1   24.40    3.60
  -1  11   1   32.40    3.90
   1 -11  -1   27.60    4.10
   1 -11  -1   24.10    3.70
  -1  11   0   38.30    3.80
  -1  11   0   47.10    7.00
  -1  11   0   41.80    4.20
   1 -11   0   39.50    4.10
   1 -11   0   31.10    3.70
  -1  11  -1   -3.00    3.20
  -1  11  -1   -2.60    3.60
  -1  11  -1    2.20    6.00
   1 -11   1   -5.80    3.60
   1 -11   1   -6.10    3.50
  -1  11  -2   36.60    4.60
  -1  11  -2   27.80    3.90
   1 -11   2   35.40    4.60
   1 -11   2   31.40    4.20
  -1  11  -3   10.80    4.30
   1 -11   3   13.70    4.30
   1 -11   3    5.40    3.40
  -1  11  -4   64.69    5.40
   1 -11   4   50.39    4.80
   1 -11   4   59.49    5.40
  -1  11  -5   -1.90    4.60
   1 -11   5   -0.10    4.10
   1 -11   5    3.50    4.60
  -1  11  -6   73.59    6.30
   1 -11   6   65.89    5.80
   1 -11   6   56.09    5.90
  -1  11  -7   -3.70    4.40
  -1  11  -7    1.00    5.40
   1 -11   7   -4.90    5.10
   1 -11   7  -10.30    4.50
  -1  11  -8    0.30    4.70
  -1  11  -8   -4.10    5.50
   1 -11   8    0.30    4.90
   1 -11   8   -1.90    5.50
  -1  11  -9  -17.00    5.90
  -1  11  -9   -3.30    4.90
   1 -11   9  -10.60    5.90
  -1  11 -10   41.90    6.40
  -1  11 -10   48.70    7.20
  -1  11 -10   58.19   11.00
   1 -11  10   34.20    6.80
  -1  11 -11   11.70   10.10
  -1  11 -11   13.40    7.00
   1 -11  11    8.60    7.00
  -1  11 -12    7.60    7.10
  -1  11 -12   11.20   10.10
   1 -11  12   -1.40    7.00
  -1  11 -13    3.30   10.50
  -1  11 -13    7.30    7.30
   1 -11  13    0.70    7.80
  -1  11 -14   -3.60   10.10
  -1  11 -14    7.30    7.70
   1 -11  14    1.80    8.00
  -1  11 -15    1.90   10.50
  -1  11 -15  -10.70    8.00
   1 -11  15  -11.40    8.10
  -1  11 -16   -4.10    8.40
   1 -11  16   -4.40    8.60
  -1  11 -17    7.30    8.90
   1 -11  17   12.30    9.40
  -1  12  16   11.70   10.60
  -1  12  15   24.30   10.30
  -1  12  14   -2.00    9.30
  -1  12  13   22.90    9.00
  -1  12  12   25.70    8.60
  -1  12  11   33.40    7.90
  -1  12  10   -3.20    8.20
  -1  12  10   -3.10    6.60
  -1  12   9   -4.10    7.80
  -1  12   9   -4.70    6.10
  -1  12   8   -5.90    5.80
  -1  12   8    9.50    7.80
  -1  12   7   61.09    6.70
  -1  12   7   66.19    8.80
  -1  12   6    5.30    7.20
  -1  12   6  -13.50    4.80
  -1  12   5   -6.10    6.80
  -1  12   4   -8.20    6.90
  -1  12   3   32.10    7.40
  -1  12   3   22.00    3.60
   1 -12  -3   21.40    4.10
  -1  12   2   -7.00    6.60
  -1  12   2   -2.20    3.40
  -1  12   2    0.60    3.50
   1 -12  -2    3.90    3.30
   1 -12  -2    6.30    3.80
  -1  12   1    7.80    7.00
  -1  12   1    1.70    3.40
  -1  12   1    5.20    3.80
   1 -12  -1   10.90    3.90
   1 -12  -1    7.10    3.30
  -1  12   0   -2.60    3.90
  -1  12   0   -2.10    6.70
   1 -12   0    0.30    3.80
  -1  12  -1  -12.10    6.40
  -1  12  -1   -3.20    4.00
   1 -12   1   -4.40    3.70
   1 -12   1   -2.40    4.20
  -1  12  -2    4.60    4.40
   1 -12   2    2.10    4.40
   1 -12   2   -0.70    3.80
  -1  12  -3   -4.80    4.30
   1 -12   3   -6.70    4.50
   1 -12   3   -0.20    2.50
  -1  12  -4   -4.40    4.70
   1 -12   4   -7.60    4.30
   1 -12   4   -5.10    4.70
  -1  12  -5   10.90    5.30
   1 -12   5   12.60    5.30
   1 -12   5    8.20    4.70
  -1  12  -6   26.80    5.80
   1 -12   6   25.80    5.30
   1 -12   6   31.20    5.80
  -1  12  -7   18.10    6.00
   1 -12   7   18.40    5.30
   1 -12   7   10.30    5.90
  -1  12  -8   -0.90    4.70
  -1  12  -8   -0.50    6.10
   1 -12   8    4.80    5.30
   1 -12   8   -9.00    5.90
  -1  12  -9   20.60    5.50
  -1  12  -9   30.80    6.90
   1 -12   9   14.80    6.50
  -1  12 -10   20.40    6.00
  -1  12 -10   16.40   10.60
  -1  12 -10   21.00    7.00
   1 -12  10   20.00    7.00
  -1  12 -11    9.00   10.60
  -1  12 -11   -1.10    7.10
   1 -12  11   -4.90    7.00
  -1  12 -12   -7.20    7.30
  -1  12 -12   -9.10   10.80
   1 -12  12   -2.70    7.40
  -1  12 -13   34.50   11.50
  -1  12 -13   42.90    8.40
   1 -12  13   41.10    8.50
  -1  12 -14    4.40   11.20
  -1  12 -14   -0.10    7.90
   1 -12  14    5.10    8.20
  -1  12 -15    0.30    8.40
   1 -12  15   -7.50    8.40
  -1  12 -16   -7.10    8.90
   1 -12  16   -5.20    8.80
  -1  13  16    6.10   10.50
  -1  13  15   10.10   10.20
  -1  13  14   70.59   11.00
  -1  13  13   11.90   10.30
  -1  13  13   10.40    9.00
  -1  13  12   16.50    8.30
  -1  13  12    7.30    9.90
  -1  13  11   21.70    8.10
  -1  13  11   14.60    9.30
  -1  13  10   62.89    8.20
  -1  13  10   46.90   10.00
  -1  13   9    4.70    8.50
  -1  13   9   -5.70    6.50
  -1  13   8    3.50    6.00
  -1  13   8    1.70    8.40
  -1  13   7   12.40    8.20
  -1  13   7   -7.20    5.50
  -1  13   6   15.50    8.10
  -1  13   5    4.50    8.00
  -1  13   4   -6.20    7.40
  -1  13   3    6.10    3.90
  -1  13   3   14.40    7.90
   1 -13  -3    3.00    3.70
   1 -13  -3    9.40    4.20
  -1  13   2   31.90    8.10
  -1  13   2   27.00    4.20
   1 -13  -2    8.60    4.00
   1 -13  -2   28.10    4.50
  -1  13   1   -3.10    7.40
  -1  13   1    0.60    4.00
   1 -13  -1   -2.30    3.90
   1 -13  -1   -6.00    3.80
  -1  13   0    0.10    4.20
  -1  13   0   -5.80    7.30
   1 -13   0   -6.20    4.10
  -1  13  -1   25.10    4.80
  -1  13  -1   18.80    7.60
   1 -13   1   17.80    4.30
   1 -13   1   21.50    5.00
  -1  13  -2   96.29    8.10
   1 -13   2  108.09    8.10
   1 -13   2   68.89    6.80
  -1  13  -3  128.79    8.90
   1 -13   3  138.29    8.90
  -1  13  -4   80.89    6.60
   1 -13   4   93.99    8.60
   1 -13   4   93.09    8.10
  -1  13  -5   20.70    5.80
   1 -13   5   26.90    5.40
   1 -13   5   14.40    5.80
  -1  13  -6  100.69    9.60
   1 -13   6  103.29    9.40
   1 -13   6  103.89    9.20
  -1  13  -7   37.30    6.70
   1 -13   7   31.80    5.90
   1 -13   7   26.80    6.50
  -1  13  -8    3.30    6.50
   1 -13   8   -1.30    6.20
  -1  13  -9    9.70    5.50
  -1  13  -9    2.80    6.80
   1 -13   9    5.40    6.70
  -1  13 -10  106.99    9.00
   1 -13  10   92.69    8.80
  -1  13 -11   53.49    8.50
  -1  13 -11   53.99   13.20
   1 -13  11   60.79    8.60
  -1  13 -12   44.30    8.50
  -1  13 -12   49.80   12.90
   1 -13  12   52.59    8.60
  -1  13 -13    1.20   11.40
  -1  13 -13    6.20    8.10
   1 -13  13    4.10    8.20
  -1  13 -14   52.89   13.10
  -1  13 -14   53.69    9.40
   1 -13  14   47.90    9.20
  -1  13 -15   20.30    9.10
   1 -13  15   11.70    9.00
  -1  14  15   25.70   10.50
  -1  14  14    7.90    9.60
  -1  14  14   13.10   11.30
  -1  14  13   39.70    9.60
  -1  14  13   26.00   11.10
  -1  14  12   22.90   10.40
  -1  14  12   45.90    9.10
  -1  14  11   53.89   10.80
  -1  14  11   59.59    9.10
  -1  14  10  -12.40    9.40
  -1  14  10    1.60    7.10
  -1  14   9   91.29   11.40
  -1  14   9  107.59   10.20
  -1  14   8   69.69    7.50
  -1  14   8   59.29   10.30
  -1  14   7  148.99   13.50
  -1  14   6    8.10    8.70
  -1  14   5   10.30    8.70
  -1  14   4   46.00    9.20
  -1  14   3   36.80    4.70
  -1  14   3   49.20    9.10
   1 -14  -3   37.70    4.90
   1 -14  -3   35.20    4.60
  -1  14   2   -4.00    4.20
  -1  14   2    2.90    8.50
   1 -14  -2   -4.00    4.00
   1 -14  -2  -10.30    4.40
  -1  14   1   89.79    7.70
  -1  14   1   87.99   10.20
   1 -14  -1   91.49    7.70
  -1  14   0   60.19    5.80
  -1  14   0   72.69    9.90
   1 -14   0   69.29    5.90
   1 -14   0   71.29    6.10
  -1  14  -1  115.19   12.10
  -1  14  -1   98.89    8.40
   1 -14   1  102.29    8.50
   1 -14   1  105.29    7.90
  -1  14  -2   -1.20    5.10
   1 -14   2   10.10    5.50
   1 -14   2   -0.50    3.00
  -1  14  -3   30.80    5.80
   1 -14   3   16.60    5.00
   1 -14   3   30.30    6.10
  -1  14  -4   20.70    6.00
   1 -14   4   25.10    5.50
   1 -14   4   20.20    6.10
  -1  14  -5   86.09    7.50
   1 -14   5   81.39    7.50
   1 -14   5   73.19    6.60
  -1  14  -6    6.50    6.20
   1 -14   6    0.60    5.50
   1 -14   6    0.50    6.10
  -1  14  -7  111.79   10.60
   1 -14   7   97.89    8.40
   1 -14   7  115.79    9.80
  -1  14  -8   78.89    8.40
   1 -14   8   77.29    8.40
  -1  14  -9  132.29   11.80
   1 -14   9  112.89    9.40
  -1  14 -10   -3.90    7.20
   1 -14  10   11.80    7.50
  -1  14 -11   -1.10    7.70
  -1  14 -11    5.50   12.20
   1 -14  11    5.30    7.80
  -1  14 -12   36.90   13.10
  -1  14 -12   20.50    8.20
   1 -14  12   31.90    8.40
  -1  14 -13   34.10    9.00
  -1  14 -13   22.80   12.90
   1 -14  13   25.50    8.90
  -1  14 -14   -1.30    8.40
  -1  14 -14  -11.90   12.30
   1 -14  14    0.90    8.50
  -1  15  14   16.30    9.80
  -1  15  13   20.40    9.50
  -1  15  13   11.50   11.20
  -1  15  12   -4.40   10.70
  -1  15  12    8.10    8.30
  -1  15  11   23.40    8.20
  -1  15  11    1.10   10.60
  -1  15  10   22.90   10.50
  -1  15  10   34.70    8.00
  -1  15   9   18.10   10.40
  -1  15   9    3.10    6.70
  -1  15   8    5.40    9.70
  -1  15   7   -7.10    9.60
  -1  15   6  148.49   14.80
  -1  15   5   51.39   10.40
  -1  15   4   -1.40    9.30
  -1  15   3  -12.10    4.40
  -1  15   3    1.30    9.10
   1 -15  -3   -2.80    4.30
   1 -15  -3   -1.40    4.80
  -1  15   2   76.09   10.50
  -1  15   2   52.29    5.60
   1 -15  -2   79.49    7.60
  -1  15   1   13.80    5.10
  -1  15   1   26.10    9.30
   1 -15  -1   15.00    5.00
  -1  15   0    7.70    9.20
  -1  15   0  -10.40    4.90
   1 -15   0    1.10    4.80
   1 -15   0   -9.10    5.40
  -1  15  -1   10.10    8.90
  -1  15  -1   -8.00    5.20
   1 -15   1  -10.30    5.40
   1 -15   1    2.40    4.80
  -1  15  -2   54.79    6.40
   1 -15   2   62.89    6.80
  -1  15  -3   -7.30    5.60
   1 -15   3  -12.20    5.90
   1 -15   3   -4.90    4.90
  -1  15  -4   27.50    6.50
   1 -15   4   28.70    6.70
   1 -15   4   30.00    6.00
  -1  15  -5   17.90    6.70
   1 -15   5   15.50    6.60
  -1  15  -6  111.69   10.70
   1 -15   6  114.29   10.80
  -1  15  -7   10.10    7.20
   1 -15   7   10.90    7.20
  -1  15  -8  -13.60    7.10
   1 -15   8  -15.00    7.10
  -1  15  -9  -14.50    7.20
   1 -15   9  -13.30    7.20
  -1  15 -10    0.70    7.80
   1 -15  10    8.20    7.80
  -1  15 -11    4.40   13.30
  -1  15 -11   -2.30    8.10
   1 -15  11   -7.00    8.00
  -1  15 -12   -9.60    8.10
  -1  15 -12   -5.80   12.80
   1 -15  12   -4.40    8.00
  -1  15 -13   -6.80   13.20
  -1  15 -13   -4.00    8.50
   1 -15  13    0.20    8.50
  -1  16  11    7.00   11.20
  -1  16  10    4.30   10.90
  -1  16   9    6.60   10.70
  -1  16   8   -6.90   10.40
  -1  16   7    2.60   10.20
  -1  16   6    0.70   10.50
  -1  16   5   25.90   10.70
  -1  16   4   -7.50   10.00
  -1  16   3    2.00    9.90
  -1  16   2    3.70    9.90
  -1  16   1   40.60   10.50
  -1  16   1   25.10    5.50
   1 -16  -1   27.10    6.10
  -1  16   0   13.30    9.80
  -1  16   0   10.60    5.70
   1 -16   0    6.80    6.00
  -1  16  -1   -1.00    5.60
   1 -16   1    5.80    6.00
  -1  16  -2    0.70    5.70
   1 -16   2   -4.60    6.20
  -1  16  -3   -8.20    5.90
   1 -16   3   -3.10    6.20
  -1  16  -4  -22.90    6.30
   1 -16   4   -4.60    6.70
  -1  16  -5   -3.00    6.70
   1 -16   5   12.70    7.00
  -1  16  -6   -0.40    7.00
   1 -16   6   -9.40    7.00
  -1  16  -7   -0.60    7.20
   1 -16   7   -3.80    7.30
  -1  16  -8    7.60    7.60
   1 -16   8    5.40    7.60
  -1  16  -9    7.10    7.90
   1 -16   9   10.60    7.90
  -1  16 -10   -1.50    8.10
   1 -16  10   -5.50    7.90
  -1  16 -11    0.70   14.00
  -1  16 -11   -7.50    8.40
   1 -16  11   -9.60    8.20
  -1  16 -12   11.50    8.80
  -1  16 -12    8.10   14.10
   1 -16  12    1.60    8.70
  -1  17  11   -8.90   11.60
  -1  17  10    6.30   11.90
  -1  17   8    1.70   11.00
  -1  17   7    2.10   10.90
  -1  17   6   34.00   11.50
  -1  17   5   -1.30   10.80
  -1  17   4    5.40   11.00
  -1  17   3   11.60   11.00
  -1  17   2   39.50   11.30
   1 -17  -2   32.30    6.30
  -1  17   1    7.30   10.60
   1 -17  -1    0.30    6.00
   1 -17   0   -2.50    6.10
   1 -17   1   10.80    6.50
   1 -17   2   63.09    7.60
   1 -17   3   17.20    7.20
   1 -17   4   -7.20    6.90
  -1  17  -5   33.60    7.90
   1 -17   5   39.30    7.80
  -1  17  -6   77.59    8.80
   1 -17   6   73.59    8.80
  -1  17  -7   18.30    8.00
   1 -17   7   28.00    8.20
  -1  17  -8   -3.60    7.70
   1 -17   8   -2.70    7.90
  -1  17  -9    7.50    8.40
   1 -17   9   10.80    8.50
  -1  17 -10   35.70    9.20
   1 -17  10   37.70    9.20
  -1  17 -11   -0.30    9.00
  -1  17 -11   22.90   15.60
   1 -17  11   10.30    9.00
  -1  18   7   18.50   12.50
  -1  18   4   77.69   13.40
  -1  18   3   62.19   12.90
  -1  18   2    8.60   11.80
   1 -18  -2   -1.20    6.30
  -1  18   1   45.80   12.50
   1 -18  -1   40.60    7.00
  -1  18   0   48.90   12.60
   1 -18   0   39.60    7.10
   1 -18   1   19.80    6.90
   1 -18   2    3.70    7.10
   1 -18   3   65.39    8.40
   1 -18   4   58.69    8.50
   1 -18   5   43.70    8.30
   1 -18   6   -1.60    7.90
   1 -18   7   16.20    8.40
   1 -18   8   21.60    8.90
   1 -18   9   15.80    8.80
  -1  19   6   31.70   13.80
   1 -19  -2    5.40    6.50
   1 -19  -1   -0.20    6.60
   1 -19   0    1.40    6.90
   1 -19   1   16.90    7.40
   1 -19   2   13.40    7.70
   1 -19   3   -3.40    7.50
   1 -19   4  -19.00    7.60
   1 -19   5   17.10    8.30
   1 -19   6   23.00    8.60
   1 -20  -1  -15.10    7.00
   1 -20   0    4.60    7.50
   1 -20   1    2.70    7.70
   1 -20   2   -1.50    7.80
  -2 -20   3   -1.10    8.20
  -2 -20   2   -0.80    7.90
  -2 -20   1   29.00    8.50
  -2 -20   0   17.90    8.30
  -2 -19   7    7.90    8.80
  -2 -19   6   14.70    8.60
  -2 -19   5   47.90    8.90
  -2 -19   4   11.60    8.00
  -2 -19   3   10.00    8.10
  -2 -19   2   16.80    8.10
  -2 -19   1   -0.70    7.80
  -2 -19  -1    8.90    7.00
  -2 -19  -2   30.80    7.30
  -2 -19  -3   23.40    7.20
  -2 -19  -4   -2.00    6.80
  -2 -19  -5    8.40    6.80
  -2 -19  -6    7.00    6.70
  -2 -18   9    6.20    8.80
  -2 -18   8    9.30    8.60
  -2 -18   7   -6.80    8.00
  -2 -18   6    0.00    7.80
  -2 -18   5    4.10    7.70
  -2 -18   4   21.50    8.10
  -2 -18   3   18.40    7.90
  -2 -18   2   -3.40    7.40
  -2 -18   0   10.90    6.80
  -2 -18  -1    1.50    6.60
  -2 -18  -2    7.10    6.50
   2  18   2   -0.40   11.70
  -2 -18  -3    9.50    6.60
   2  18   3   -4.80   11.90
  -2 -18  -4   29.10    6.80
   2  18   4   41.20   12.80
  -2 -18  -5   21.60    6.70
   2  18   5   16.70   12.60
  -2 -18  -6   -2.90    6.70
   2  18   6   11.20   12.20
  -2 -18  -7   -4.30    6.70
   2  18   7    7.70   12.60
   2  18   9   10.00   13.20
  -2 -17  11    5.10    9.10
   2  17 -11   20.80    9.20
  -2 -17  10   -8.10    8.40
   2  17 -10   -3.90    8.70
  -2 -17   9   -7.40    8.00
   2  17  -9   -4.60    8.40
  -2 -17   8    4.80    7.90
   2  17  -8    3.30    8.20
  -2 -17   7   -1.20    7.60
   2  17  -7   14.60    8.00
  -2 -17   6    1.70    7.60
   2  17  -6   -3.40    7.40
  -2 -17   5   -6.60    7.20
   2  17  -5   -7.50    7.20
  -2 -17   4    0.90    7.40
   2  17  -4   -1.20    7.00
  -2 -17   3    4.50    7.20
   2  17  -3    6.80    6.70
   2  17  -2    5.50    6.70
  -2 -17   1   10.40    6.40
   2  17  -1   -8.10    6.50
  -2 -17   0    9.00    6.20
   2  17   0    9.40   10.70
  -2 -17  -1   20.10    6.50
   2  17   1   20.20   11.50
  -2 -17  -2    1.10    6.20
  -2 -17  -3   11.20    6.10
   2  17   3   15.70   11.20
  -2 -17  -4    4.10    5.90
   2  17   4    2.40   11.00
  -2 -17  -5    3.60    6.40
   2  17   5   -0.20   11.10
  -2 -17  -6    3.90    6.70
   2  17   6    4.50   11.50
  -2 -17  -7   -6.70    6.60
   2  17   7    8.90   11.20
  -2 -17  -8    2.30    6.70
   2  17   8   -8.80   11.50
   2  17   9   13.50   12.10
   2  17  10    6.00   12.00
  -2 -16  13   -7.70    9.00
   2  16 -13    2.00    9.30
  -2 -16  12   14.20    9.10
   2  16 -12    7.80    9.00
  -2 -16  11    9.90    8.60
   2  16 -11   15.20    8.90
  -2 -16  10    2.00    8.00
   2  16 -10   -8.60    8.20
  -2 -16   9   -0.70    7.80
   2  16  -9    1.60    8.10
  -2 -16   8    9.70    7.70
   2  16  -8    5.40    7.80
  -2 -16   7    7.40    7.50
   2  16  -7    8.90    7.30
  -2 -16   6  -12.60    7.00
   2  16  -6   -3.90    6.90
  -2 -16   5   17.60    7.30
   2  16  -5   17.40    7.20
  -2 -16   4   74.79    8.20
   2  16  -4   72.59    8.00
   2  16  -3   10.20    6.70
  -2 -16   2   11.00    6.10
   2  16  -2   13.50    6.50
  -2 -16   1   11.20    6.20
   2  16  -1   17.90    9.90
   2  16  -1   14.10    6.20
  -2 -16   0   15.30    6.10
   2  16   0   13.90   10.10
   2  16   0   16.50    6.10
  -2 -16  -1   15.00    6.10
   2  16   1   15.70    5.90
   2  16   1   18.40   10.40
  -2 -16  -2   13.80    5.90
   2  16   2    2.20    5.70
   2  16   2    4.70   10.20
  -2 -16  -3   40.00    6.10
   2  16   3   35.70    6.20
   2  16   3   39.20   11.20
  -2 -16  -4  191.68   10.70
   2  16   4  164.88   16.10
  -2 -16  -5   38.10    6.80
   2  16   5   27.40   11.20
  -2 -16  -6   -0.50    6.10
   2  16   6    3.00   10.40
  -2 -16  -7   22.60    6.70
   2  16   7   15.00   11.00
  -2 -16  -8   28.70    7.10
   2  16   8   21.80   11.40
  -2 -16  -9   16.20    7.10
   2  16  10   15.30   11.60
  -2 -15  14    3.70    9.10
   2  15 -14   11.00   13.80
   2  15 -14   -4.70    9.20
  -2 -15  13   -7.30    8.80
   2  15 -13   -4.80    8.80
  -2 -15  12   -1.80    8.60
   2  15 -12    0.00    8.30
  -2 -15  11   -0.40    8.20
   2  15 -11    1.00    8.10
  -2 -15  10   -3.70    7.70
   2  15 -10    1.70    7.90
  -2 -15   9    5.70    7.60
   2  15  -9   14.70    7.90
  -2 -15   8   -4.40    6.90
   2  15  -8    1.20    7.30
  -2 -15   7  -12.50    6.80
   2  15  -7  -11.50    6.80
  -2 -15   6    1.30    6.90
  -2 -15   6   -7.90    6.20
   2  15  -6  -10.10    6.90
  -2 -15   5   34.50    7.20
  -2 -15   5   21.70    6.20
   2  15  -5   31.60    7.10
  -2 -15   4  -11.00    5.30
  -2 -15   4   -0.30    6.40
   2  15  -4   -7.20    6.10
  -2 -15   3    4.30    5.40
   2  15  -3   14.70    6.40
  -2 -15   2    9.50    5.80
  -2 -15   2   11.10    5.70
   2  15  -2    3.80    6.00
  -2 -15   1   29.10    5.70
  -2 -15   1   28.20    6.00
   2  15  -1   40.80    9.60
   2  15  -1   22.60    6.10
  -2 -15   0    1.20    5.40
  -2 -15   0   -0.50    4.70
   2  15   0   -7.40    5.30
   2  15   0   -1.60    9.00
  -2 -15  -1    4.20    2.90
  -2 -15  -1    1.70    5.30
   2  15   1   -6.80    5.20
   2  15   1   -3.30    9.20
  -2 -15  -2   28.60    5.60
  -2 -15  -2   26.00    5.50
   2  15   2   31.60    9.90
   2  15   2   35.30    5.80
  -2 -15  -3   66.89    6.80
   2  15   3   71.89    6.40
   2  15   3   62.89   10.60
  -2 -15  -4   12.10    5.80
   2  15   4    1.70    9.50
   2  15   4    1.90    5.30
  -2 -15  -5   95.59    8.90
   2  15   5   62.99    6.50
   2  15   5   65.79   11.00
  -2 -15  -6   64.09    6.90
   2  15   6   49.40   11.00
  -2 -15  -7  117.79    9.80
   2  15   7   90.99   12.20
  -2 -15  -8   23.50    6.60
   2  15   8   16.40   10.40
  -2 -15  -9   -4.20    6.40
   2  15   9   -4.70   10.30
  -2 -15 -10   15.70    6.80
   2  15  10   10.90   10.50
  -2 -15 -11   26.90    7.10
   2  15  11   32.80   11.50
   2  15  12    9.90   11.50
  -2 -15 -13   -3.90    7.40
   2  15  13    2.30   11.50
  -2 -14  15   -7.40    9.30
   2  14 -15    1.60    9.50
  -2 -14  14   -2.80    8.90
   2  14 -14    1.90   12.60
   2  14 -14   -1.20    8.70
  -2 -14  13  -17.50    8.40
   2  14 -13   -4.90    8.30
  -2 -14  12   -4.20    8.10
   2  14 -12   -4.80    8.00
  -2 -14  11   -4.10    7.70
   2  14 -11   -9.00    7.80
  -2 -14  10   33.00    7.90
   2  14 -10   24.30    7.90
  -2 -14   9   -3.80    7.00
   2  14  -9   -0.70    7.30
  -2 -14   8   -0.50    6.80
   2  14  -8   -7.80    6.80
  -2 -14   7    0.40    6.50
   2  14  -7    4.00    6.60
  -2 -14   6   -2.70    5.40
  -2 -14   6   -3.10    6.20
   2  14  -6   -1.40    6.30
  -2 -14   5  -11.20    5.90
  -2 -14   5   -2.50    5.10
   2  14  -5   -8.50    5.80
  -2 -14   4    0.70    5.10
   2  14  -4   -2.10    5.70
  -2 -14   3  -12.60    5.20
  -2 -14   3   -8.50    4.90
   2  14  -3   -3.90    5.70
  -2 -14   2   36.80    5.70
  -2 -14   2   35.20    5.70
   2  14  -2   29.50    5.90
  -2 -14   1   -2.20    4.80
  -2 -14   1   -5.90    5.10
   2  14  -1   -4.70    5.10
   2  14  -1    1.50    8.10
  -2 -14   0   37.20    5.60
   2  14   0   52.29    5.90
   2  14   0   60.09    9.40
  -2 -14  -1   -8.40    4.80
  -2 -14  -1   -1.10    4.10
   2  14   1    0.50    5.10
   2  14   1    9.50    8.40
  -2 -14  -2   -0.50    4.80
  -2 -14  -2   -6.10    5.30
   2  14   2    8.10    8.50
   2  14   2   -4.00    4.90
  -2 -14  -3   -2.80    4.90
  -2 -14  -3    2.40    5.40
   2  14   3   -3.30    8.50
   2  14   3   -0.80    5.00
  -2 -14  -4  204.88   10.10
  -2 -14  -4  196.08   10.30
   2  14   4  185.88   14.20
   2  14   4  183.98    9.80
  -2 -14  -5   57.39    6.40
  -2 -14  -5   43.90    5.90
   2  14   5   44.00    5.80
   2  14   5   53.39    9.70
  -2 -14  -6   -1.50    5.70
   2  14   6    1.20    8.90
   2  14   6   -7.60    4.90
  -2 -14  -7    0.90    6.00
   2  14   7    4.00    9.00
   2  14   7    5.50    5.20
  -2 -14  -8  184.08   10.40
   2  14   8  163.08   14.50
  -2 -14  -9    8.40    6.30
   2  14   9    2.40    9.70
  -2 -14 -10    3.50    6.40
   2  14  10    1.00   10.00
  -2 -14 -11   -3.00    6.50
   2  14  11   -5.80    9.70
  -2 -14 -12    7.40    6.90
   2  14  12   16.00   10.50
  -2 -14 -13   -6.10    7.00
   2  14  13    0.10   10.80
  -2 -14 -14    1.20    7.30
   2  14  14  -10.20   11.10
  -2 -13  16  -19.10    9.10
   2  13 -16  -22.50    9.00
  -2 -13  15   33.30    9.60
   2  13 -15   32.20    9.70
  -2 -13  14    3.40    8.90
   2  13 -14    6.20    8.60
   2  13 -14   10.50   12.00
  -2 -13  13   26.40    8.70
   2  13 -13   24.80    8.70
  -2 -13  12  -12.40    7.70
   2  13 -12   -4.60    7.50
  -2 -13  11  134.49   12.40
   2  13 -11  138.39   12.40
  -2 -13  10   36.70    7.70
   2  13 -10   31.60    7.90
  -2 -13   9   49.70    7.60
   2  13  -9   59.29    7.80
  -2 -13   8   12.20    6.30
   2  13  -8    0.30    6.30
  -2 -13   7    5.80    6.10
  -2 -13   7    5.00    5.60
   2  13  -7   13.90    6.40
  -2 -13   6   28.80    6.30
  -2 -13   6   32.50    5.70
   2  13  -6   20.60    6.30
  -2 -13   5   39.40    6.30
  -2 -13   5   28.40    5.60
   2  13  -5   47.00    6.30
  -2 -13   4    0.90    4.60
   2  13  -4   -2.40    5.30
  -2 -13   3   57.89    5.70
  -2 -13   3   53.09    5.80
   2  13  -3   60.29    6.20
  -2 -13   2   -7.90    4.40
  -2 -13   2   -9.60    4.60
   2  13  -2   -7.80    4.80
  -2 -13   1   -2.90    4.50
  -2 -13   1   -7.60    3.50
   2  13  -1   -2.00    7.50
   2  13  -1   -3.80    4.60
  -2 -13   0   -1.00    3.20
  -2 -13   0    2.20    4.30
   2  13   0   -6.90    4.50
   2  13   0   -6.00    7.40
  -2 -13  -1    3.20    4.70
  -2 -13  -1   -5.60    4.40
   2  13   1   -2.00    4.60
   2  13   1   -4.10    7.30
  -2 -13  -2   -2.40    4.80
  -2 -13  -2    2.60    4.40
   2  13   2   -7.20    7.50
   2  13   2    6.80    4.60
  -2 -13  -3   15.30    5.10
  -2 -13  -3   15.70    4.90
   2  13   3   20.60    8.00
   2  13   3   13.90    4.90
  -2 -13  -4   -1.00    4.70
  -2 -13  -4   -2.00    4.90
   2  13   4    7.80    7.80
   2  13   4    0.20    4.70
  -2 -13  -5   -6.20    5.10
  -2 -13  -5   -9.60    4.60
   2  13   5   -3.30    4.70
   2  13   5    8.30    8.10
  -2 -13  -6   -3.20    5.30
  -2 -13  -6    0.10    4.80
   2  13   6   -7.80    4.70
   2  13   6    0.90    8.10
  -2 -13  -7   -3.30    5.40
  -2 -13  -7   -0.20    4.50
   2  13   7    0.30    4.80
   2  13   7   -0.40    8.40
  -2 -13  -8    2.60    5.60
   2  13   8    3.60    8.60
   2  13   8   -4.30    4.80
  -2 -13  -9   13.90    6.20
  -2 -13  -9   11.60    6.10
   2  13   9   11.50    5.30
   2  13   9   13.10    9.10
  -2 -13 -10   -1.60    6.10
   2  13  10  -11.70    9.10
  -2 -13 -11   34.50    6.90
   2  13  11   32.40   10.10
  -2 -13 -12    0.80    6.50
   2  13  12   -1.30    9.70
  -2 -13 -13    0.80    6.80
   2  13  13   -1.20   10.40
  -2 -13 -14   -1.60    7.30
  -2 -13 -15   40.90    8.20
  -2 -12  17    5.70    9.80
   2  12 -17    7.50    9.20
  -2 -12  16   56.19   10.30
   2  12 -16   69.99   10.20
  -2 -12  15    8.70    8.80
   2  12 -15   18.40    9.10
  -2 -12  14   11.30    8.60
   2  12 -14   14.30   10.60
   2  12 -14    5.50    8.20
  -2 -12  13    2.00    7.90
   2  12 -13    9.80    8.10
  -2 -12  12  267.97   14.70
   2  12 -12  283.77   14.60
  -2 -12  11   20.80    7.30
   2  12 -11   27.80    7.40
   2  12 -11   11.20    5.20
  -2 -12  10   62.69    7.80
   2  12 -10   36.20    5.60
   2  12 -10   52.29    7.70
  -2 -12   9   -9.90    6.10
   2  12  -9    5.50    6.40
  -2 -12   8  111.09    9.80
   2  12  -8  120.49   10.20
  -2 -12   7   15.50    5.90
  -2 -12   7    3.60    5.30
   2  12  -7   15.70    6.10
  -2 -12   6   40.30    6.10
  -2 -12   6   39.30    5.70
   2  12  -6   37.40    6.20
  -2 -12   5    6.90    4.60
  -2 -12   5    5.70    5.30
   2  12  -5    7.60    5.20
  -2 -12   4  442.46   14.10
  -2 -12   4  406.06   14.20
   2  12  -4  432.36   14.40
  -2 -12   3   51.79    5.40
  -2 -12   3   76.39    7.30
   2  12  -3   50.39    5.60
  -2 -12   2   74.99    7.00
  -2 -12   2   80.69    7.60
   2  12  -2   85.19    7.50
  -2 -12   1    1.20    4.20
  -2 -12   1    0.60    2.50
   2  12  -1    5.30    7.10
   2  12  -1    0.40    4.30
  -2 -12   0  216.18    9.20
  -2 -12   0  212.28    9.20
   2  12   0  221.18   12.60
   2  12   0  223.88    9.40
  -2 -12  -1   44.30    4.90
  -2 -12  -1   45.50    5.10
   2  12   1   44.10    7.70
   2  12   1   43.00    4.90
  -2 -12  -2   22.10    4.40
  -2 -12  -2   28.50    4.80
   2  12   2   22.40    4.60
   2  12   2   14.40    7.10
  -2 -12  -3   15.20    4.50
  -2 -12  -3    1.20    4.20
   2  12   3    3.60    4.20
   2  12   3    4.70    7.00
  -2 -12  -4  229.68    9.70
  -2 -12  -4  228.58   10.00
   2  12   4  233.18    9.60
   2  12   4  231.48   13.60
  -2 -12  -5   54.79    5.60
  -2 -12  -5   50.99    5.40
   2  12   5   55.69    8.50
   2  12   5   60.69    5.30
  -2 -12  -6   61.49    5.50
  -2 -12  -6   85.69    7.70
   2  12   6   70.29    8.80
   2  12   6   79.99    7.30
  -2 -12  -7   -1.20    4.90
  -2 -12  -7    0.20    4.90
  -2 -12  -7   -4.80    4.10
   2  12   7   -4.50    7.70
   2  12   7    1.30    4.60
  -2 -12  -8   85.89    9.20
  -2 -12  -8   72.99    6.50
  -2 -12  -8   87.09    7.60
   2  12   8   67.19    5.90
   2  12   8   82.59    9.80
  -2 -12  -9   13.00    6.10
  -2 -12  -9    2.90    4.60
  -2 -12  -9    7.70    5.60
   2  12   9   14.20    8.40
   2  12   9   12.90    4.90
  -2 -12 -10   20.80    6.10
   2  12  10   35.40    5.60
   2  12  10   26.40    9.00
  -2 -12 -11   -1.20    6.20
   2  12  11  -14.80    8.80
  -2 -12 -12  154.18   10.80
  -2 -12 -13   25.20    7.30
  -2 -12 -14    2.00    7.30
  -2 -12 -15   -4.80    7.70
  -2 -12 -16   34.20    8.50
  -2 -11  17   44.30    9.90
   2  11 -17   29.20    9.60
  -2 -11  16   -4.40    8.80
   2  11 -16   -2.40    8.80
  -2 -11  15   23.30    9.10
   2  11 -15    5.80    8.60
  -2 -11  14   41.70    8.70
   2  11 -14   34.80   10.90
   2  11 -14   41.50    8.80
  -2 -11  13  225.68   13.90
   2  11 -13  230.88   13.90
   2  11 -13  187.68   18.70
  -2 -11  12   11.70    7.40
   2  11 -12   13.30    7.20
  -2 -11  11  -12.00    6.40
   2  11 -11   -2.80    5.10
   2  11 -11   -2.00    6.70
  -2 -11  10   12.70    6.60
   2  11 -10    5.10    5.00
   2  11 -10   24.20    6.80
  -2 -11   9   81.69    7.30
   2  11  -9   76.29    7.50
  -2 -11   8    1.80    5.50
  -2 -11   8   -1.00    4.90
   2  11  -8    3.10    5.60
  -2 -11   7   92.99    9.00
  -2 -11   7  111.79    8.80
   2  11  -7  110.69    9.00
  -2 -11   6  111.79    8.80
  -2 -11   6  120.99    8.60
   2  11  -6  115.69    9.00
  -2 -11   5  262.87   10.60
   2  11  -5  247.58   10.80
  -2 -11   4    5.50    4.00
  -2 -11   4    6.90    4.10
   2  11  -4    4.50    4.50
  -2 -11   3   51.39    5.10
  -2 -11   3   83.39    6.80
   2  11  -3   62.69    5.40
  -2 -11   2  208.38    9.70
   2  11  -2  246.38   12.40
   2  11  -2  253.17    9.70
  -2 -11   1  647.04   18.50
   2  11  -1  661.63   18.40
   2  11  -1  685.33   22.20
  -2 -11   0   14.60    4.10
  -2 -11   0   11.10    4.40
   2  11   0   27.80    6.50
   2  11   0   17.20    4.40
   2  11   0   20.80    3.90
  -2 -11  -1  133.69    7.40
  -2 -11  -1  126.29    7.50
   2  11   1  128.29    7.30
   2  11   1  130.69   10.50
   2  11   1  125.89    7.30
  -2 -11  -2  127.59    7.60
  -2 -11  -2  122.79    7.40
   2  11   2  125.79    7.40
   2  11   2  122.59   10.30
   2  11   2  108.89    6.90
  -2 -11  -3  258.37    9.90
  -2 -11  -3  257.67    9.60
   2  11   3  231.48   12.70
   2  11   3  246.78    9.40
   2  11   3  249.78    9.50
  -2 -11  -4    7.10    4.20
  -2 -11  -4    2.10    4.10
   2  11   4    9.20    6.50
   2  11   4    6.00    3.90
  -2 -11  -5   92.59    7.20
  -2 -11  -5  103.09    7.20
   2  11   5   98.49    6.80
   2  11   5   80.99    8.40
  -2 -11  -6   84.99    7.20
  -2 -11  -6   84.99    7.80
  -2 -11  -6   63.69    5.70
   2  11   6   98.99    7.80
   2  11   6   73.09    8.60
   2  11   6   80.59    7.10
  -2 -11  -7  266.67   12.60
  -2 -11  -7  284.57   10.70
  -2 -11  -7  265.77   10.40
   2  11   7  256.87   14.30
   2  11   7  296.67   12.50
   2  11   7  275.27   10.50
  -2 -11  -8    5.70    4.30
  -2 -11  -8    2.90    5.40
  -2 -11  -8    4.10    5.00
   2  11   8   -0.10    7.30
   2  11   8    5.80    4.60
   2  11   8   20.00    6.00
  -2 -11  -9   28.80    4.80
  -2 -11  -9   36.30    6.70
  -2 -11  -9   43.60    5.80
   2  11   9   47.50    7.20
   2  11   9   31.50    8.40
   2  11   9   30.70    5.20
  -2 -11 -10   40.60    5.20
  -2 -11 -10   53.19    6.50
   2  11  10   87.39   10.40
   2  11  10   50.09    5.90
  -2 -11 -11   59.89    7.00
   2  11  11  100.79   11.60
   2  11  11   60.19    6.30
  -2 -11 -12    2.80    6.50
   2  11  12    7.40    8.40
   2  11  12   -0.40    5.60
  -2 -11 -13   61.09    7.90
  -2 -11 -14   17.10    7.60
  -2 -11 -15   43.90    8.40
  -2 -11 -16    7.10    8.20
  -2 -11 -17    8.50    8.80
  -2 -10  18  -12.00    9.30
   2  10 -18   -9.00    9.10
  -2 -10  17  -20.50    8.60
   2  10 -17   -5.70    8.60
  -2 -10  16    3.70    8.90
   2  10 -16   15.00    8.80
  -2 -10  15  -11.80    8.20
   2  10 -15   -5.90    7.90
  -2 -10  14    3.50    7.70
   2  10 -14    7.10    7.90
  -2 -10  13    6.70    7.40
   2  10 -13   -5.90    7.00
   2  10 -13    2.60    9.00
  -2 -10  12    2.50    6.90
   2  10 -12   -1.00    6.60
  -2 -10  11   -3.50    6.20
   2  10 -11   -8.90    4.90
   2  10 -11   -2.70    6.30
  -2 -10  10   89.09    7.60
   2  10 -10   81.19    8.40
   2  10 -10   96.49    7.90
  -2 -10   9   -0.60    5.70
   2  10  -9    3.60    5.60
   2  10  -9    1.80    4.20
  -2 -10   8  132.39    9.00
  -2 -10   8  131.29    9.20
   2  10  -8  127.09    9.20
  -2 -10   7   -5.10    4.90
  -2 -10   7  -15.60    4.40
   2  10  -7   -3.30    5.00
  -2 -10   6   -4.10    4.20
  -2 -10   6    2.70    4.60
   2  10  -6    3.10    4.70
  -2 -10   5   10.20    4.10
   2  10  -5   11.00    4.40
  -2 -10   4    4.10    4.00
  -2 -10   4    0.30    2.80
  -2 -10   4   -6.30    3.60
   2  10  -4   -6.40    3.90
   2  10  -4    3.90    3.40
  -2 -10   3   19.30    4.40
  -2 -10   3   17.40    3.60
  -2 -10   3   16.20    4.20
   2  10  -3   19.70    3.80
   2  10  -3   20.60    4.20
  -2 -10   2    6.60    3.70
  -2 -10   2    1.20    4.30
  -2 -10   2    1.90    2.60
   2  10  -2    5.20    5.40
   2  10  -2    3.20    3.80
   2  10  -2    5.70    3.40
  -2 -10   1    8.60    4.70
  -2 -10   1    8.40    3.40
  -2 -10   1    8.70    3.60
   2  10  -1   12.10    5.80
   2  10  -1   10.20    3.80
   2  10  -1   12.70    3.50
  -2 -10   0   19.40    3.90
  -2 -10   0    8.10    4.80
  -2 -10   0   10.80    3.60
   2  10   0   20.30    3.90
   2  10   0   19.60    5.80
   2  10   0   14.90    3.60
  -2 -10  -1   26.20    4.00
  -2 -10  -1   21.90    3.90
  -2 -10  -1   21.70    5.10
   2  10   1   23.00    3.70
   2  10   1   23.40    3.80
   2  10   1   28.10    6.00
  -2 -10  -2    2.00    3.40
  -2 -10  -2   -7.80    3.50
   2  10   2   -6.00    3.00
   2  10   2   -3.90    5.60
   2  10   2   -3.00    3.50
  -2 -10  -3   -0.30    3.70
  -2 -10  -3    2.00    3.80
   2  10   3    4.60    3.60
   2  10   3    0.70    3.20
   2  10   3    5.20    5.80
  -2 -10  -4   11.70    3.70
  -2 -10  -4   11.10    4.00
   2  10   4   21.60    6.20
   2  10   4   18.30    3.50
   2  10   4   13.40    3.70
  -2 -10  -5    6.50    3.90
  -2 -10  -5    1.80    3.90
   2  10   5    6.10    3.40
   2  10   5    5.60    3.70
   2  10   5    1.90    6.10
  -2 -10  -6    2.10    4.20
  -2 -10  -6   -6.10    3.90
  -2 -10  -6   -1.20    3.70
   2  10   6   -0.60    3.30
   2  10   6   -1.30    3.70
   2  10   6   -8.50    6.10
   2  10   6    7.00    4.50
  -2 -10  -7    3.10    3.80
  -2 -10  -7   -0.10    4.20
  -2 -10  -7    3.90    4.80
   2  10   7    9.70    5.10
   2  10   7    0.50    4.00
   2  10   7   -2.60    6.40
  -2 -10  -8   79.59    8.70
  -2 -10  -8   58.19    5.60
  -2 -10  -8   59.69    5.30
   2  10   8   61.39    5.50
   2  10   8   98.39    8.80
  -2 -10  -9    5.20    5.10
  -2 -10  -9    9.50    4.20
  -2 -10  -9    8.50    5.90
   2  10   9   12.30    4.80
   2  10   9   28.60    6.40
  -2 -10 -10   15.30    4.50
  -2 -10 -10   16.20    5.60
   2  10  10   28.30    7.10
   2  10  10   10.70    5.00
  -2 -10 -11   10.10    4.60
  -2 -10 -11    4.00    6.00
   2  10  11   24.60    7.60
   2  10  11    4.90    5.40
  -2 -10 -12   -9.20    6.30
   2  10  12    2.50    5.60
   2  10  12   -0.80    8.00
  -2 -10 -13   12.90    7.00
   2  10  13   17.90    9.30
   2  10  13   -3.00    5.90
  -2 -10 -14  -11.60    7.10
  -2 -10 -15    7.00    7.80
  -2 -10 -16    5.30    8.10
  -2 -10 -17   -8.90    8.70
  -2  -9  18    5.60    9.70
   2   9 -18   -4.40    9.20
  -2  -9  17   -8.50    8.50
   2   9 -17   -9.30    8.40
  -2  -9  16    2.40    8.40
   2   9 -16    3.80    8.00
  -2  -9  15   14.50    8.20
   2   9 -15   12.70    8.00
  -2  -9  14   14.30    7.40
   2   9 -14    6.20    7.30
  -2  -9  13   66.39    8.10
   2   9 -13   78.79    8.10
  -2  -9  12   29.00    7.10
   2   9 -12   29.10    6.90
  -2  -9  11   13.00    6.10
   2   9 -11   12.40    6.10
   2   9 -11    8.80    5.10
  -2  -9  10   -6.30    5.40
   2   9 -10   -3.10    5.50
   2   9 -10   -4.40    4.50
  -2  -9   9    3.20    4.90
  -2  -9   9   -2.30    4.90
   2   9  -9   -6.90    4.00
   2   9  -9    0.20    5.20
  -2  -9   8    4.60    4.80
  -2  -9   8   -4.30    4.30
   2   9  -8   -0.80    4.70
   2   9  -8   -5.20    3.60
  -2  -9   7   -2.40    4.40
  -2  -9   7   -6.50    3.90
   2   9  -7   -4.60    4.40
  -2  -9   6    5.60    3.90
  -2  -9   6    0.30    4.20
   2   9  -6    7.10    3.40
   2   9  -6    5.90    4.30
  -2  -9   5   99.39    7.20
   2   9  -5   83.29    7.10
  -2  -9   4   14.40    3.70
  -2  -9   4    4.80    3.60
  -2  -9   4   11.10    3.40
   2   9  -4   13.70    3.90
   2   9  -4    6.00    2.10
  -2  -9   3    2.00    2.20
  -2  -9   3    5.20    3.50
  -2  -9   3    7.40    3.90
   2   9  -3    5.90    3.20
   2   9  -3    7.80    3.70
  -2  -9   2   20.50    4.40
  -2  -9   2    9.90    3.60
  -2  -9   2   15.40    3.50
   2   9  -2   15.90    5.40
   2   9  -2   13.00    3.70
   2   9  -2   15.60    3.40
  -2  -9   1  474.65   13.90
  -2  -9   1  480.85   13.80
  -2  -9   1  484.05   16.30
   2   9  -1  495.35   13.90
   2   9  -1  484.05   13.90
   2   9  -1  475.05   16.60
  -2  -9   0   31.40    4.00
  -2  -9   0   38.30    5.30
  -2  -9   0   35.90    4.00
   2   9   0   37.90    3.70
   2   9   0   47.20    6.10
   2   9   0   33.70    4.00
  -2  -9  -1   53.59    5.70
  -2  -9  -1   47.90    4.10
  -2  -9  -1   52.49    4.30
   2   9   1   51.99    4.20
   2   9   1   64.59    5.50
   2   9   1   50.99    6.20
  -2  -9  -2   30.60    3.80
  -2  -9  -2   22.90    3.70
   2   9   2   26.50    3.60
   2   9   2   22.90    5.70
   2   9   2   20.60    3.30
  -2  -9  -3  171.68    7.70
  -2  -9  -3  159.58    7.20
   2   9   3  172.48    7.20
   2   9   3  169.08    7.30
   2   9   3  154.18    9.90
  -2  -9  -4    2.40    3.50
  -2  -9  -4    2.50    3.50
   2   9   4    1.00    3.10
   2   9   4    5.20    3.40
   2   9   4    6.80    5.50
  -2  -9  -5    2.30    2.70
  -2  -9  -5    8.40    3.70
  -2  -9  -5    8.80    3.60
   2   9   5    8.60    3.30
   2   9   5    5.30    3.40
   2   9   5   11.80    5.80
   2   9   5   14.10    4.10
  -2  -9  -6    1.40    3.60
  -2  -9  -6    3.90    4.20
  -2  -9  -6    1.80    3.40
   2   9   6    3.90    3.60
   2   9   6    4.40    5.50
   2   9   6   17.00    4.50
   2   9   6   -1.70    3.10
   2   9   6    3.00    5.80
  -2  -9  -7   19.00    4.20
  -2  -9  -7   19.80    4.00
  -2  -9  -7   25.60    5.10
   2   9   7   28.20    7.00
   2   9   7   19.30    4.10
   2   9   7   22.60    3.70
  -2  -9  -8    6.20    3.70
  -2  -9  -8    4.90    4.30
  -2  -9  -8    5.90    5.10
   2   9   8    0.00    4.00
   2   9   8    5.70    6.60
   2   9   8   13.10    5.60
  -2  -9  -9   -2.10    5.30
  -2  -9  -9    3.80    3.90
  -2  -9  -9   -2.90    4.70
   2   9   9    2.70    4.50
   2   9   9   15.00    6.10
   2   9   9    7.10    6.80
  -2  -9 -10    2.00    5.30
  -2  -9 -10    5.30    4.20
   2   9  10    3.00    7.00
   2   9  10   24.40    6.70
   2   9  10    0.10    4.80
  -2  -9 -11   -2.00    5.70
  -2  -9 -11    0.90    4.10
   2   9  11  -12.20    7.70
   2   9  11    5.60    7.10
   2   9  11   -1.10    5.00
  -2  -9 -12   19.60    6.40
  -2  -9 -12   10.10    4.10
   2   9  12   27.70    8.10
   2   9  12   23.70    5.90
  -2  -9 -13   58.29    7.60
   2   9  13   54.99    9.80
   2   9  13   52.39    6.80
  -2  -9 -14    5.00    7.30
   2   9  14   12.10    6.50
   2   9  14   15.00    9.50
  -2  -9 -15   25.30    8.00
  -2  -9 -16   -9.70    8.10
  -2  -9 -17   -1.80    8.60
  -2  -9 -18    5.80    9.20
  -2  -8  19   15.10    9.60
   2   8 -19    9.20    9.30
  -2  -8  18  -13.50    8.60
   2   8 -18   -2.80    8.90
  -2  -8  17   -1.70    8.30
   2   8 -17   -3.30    8.30
  -2  -8  16  316.47   15.80
   2   8 -16  291.67   15.40
  -2  -8  15   18.30    7.70
   2   8 -15   18.70    7.70
  -2  -8  14   -5.60    6.90
   2   8 -14   -7.10    6.90
  -2  -8  13    5.40    6.80
   2   8 -13    7.50    6.70
  -2  -8  12  514.35   17.50
   2   8 -12  502.75   17.40
  -2  -8  11   32.60    6.20
   2   8 -11   27.90    6.00
   2   8 -11   10.00    5.30
  -2  -8  10  135.09    9.30
   2   8 -10  129.69    9.00
   2   8 -10  134.59    9.30
  -2  -8   9    0.90    4.70
  -2  -8   9    1.00    4.20
   2   8  -9   -2.60    4.80
   2   8  -9   -0.50    4.00
  -2  -8   8   66.09    5.80
  -2  -8   8   75.89    7.20
   2   8  -8   65.19    6.60
   2   8  -8   53.69    5.40
  -2  -8   7   26.10    4.40
  -2  -8   7   23.60    4.60
   2   8  -7   20.50    4.40
   2   8  -7   27.20    4.00
   2   8  -7   19.90    3.80
  -2  -8   6  134.79    7.50
  -2  -8   6  124.29    7.50
   2   8  -6  118.69    6.90
   2   8  -6  129.79    7.60
  -2  -8   5    3.10    3.50
  -2  -8   5    1.70    2.60
   2   8  -5   11.40    3.90
   2   8  -5    5.10    3.00
  -2  -8   4  377.56   11.60
  -2  -8   4  334.87   12.60
   2   8  -4  384.46   11.70
  -2  -8   3  186.48    8.00
  -2  -8   3  202.68    9.20
   2   8  -3  167.68    7.00
   2   8  -3  218.38    8.10
  -2  -8   2  813.52   20.90
  -2  -8   2  826.92   24.20
  -2  -8   2  780.32   20.90
   2   8  -2  802.12   24.30
   2   8  -2  826.62   21.00
   2   8  -2  811.42   20.90
  -2  -8   1   20.60    4.70
  -2  -8   0  680.23   17.80
  -2  -8   0  679.33   20.90
  -2  -8   0  680.33   17.80
   2   8   0  674.23   20.90
   2   8   0  653.43   17.60
   2   8   0  663.03   17.60
  -2  -8  -1   86.09    5.80
  -2  -8  -1   90.49    5.90
   2   8   1   79.19    5.70
   2   8   1   85.99    5.80
   2   8   1   78.99    7.60
  -2  -8  -2  231.18    8.30
  -2  -8  -2  208.78    7.90
   2   8   2  213.48    7.90
   2   8   2  223.48    8.00
   2   8   2  222.58   10.60
  -2  -8  -3   26.40    3.50
  -2  -8  -3   23.80    3.60
   2   8   3   23.00    3.40
   2   8   3   27.20    5.30
   2   8   3   25.00    3.40
  -2  -8  -4  316.87   11.50
  -2  -8  -4  317.97   10.40
  -2  -8  -4  301.47   10.00
   2   8   4  303.17    9.90
   2   8   4  317.17   11.50
   2   8   4  313.07   10.10
   2   8   4  333.97   12.90
  -2  -8  -5   27.20    3.80
  -2  -8  -5   19.30    3.50
   2   8   5   31.50    6.10
   2   8   5   22.80    3.50
   2   8   5   26.20    3.70
   2   8   5   30.50    5.90
  -2  -8  -6   34.60    3.80
  -2  -8  -6   35.20    3.90
  -2  -8  -6   46.00    5.00
   2   8   6   35.60    6.10
   2   8   6   32.80    3.60
   2   8   6   31.70    4.00
  -2  -8  -7    7.60    3.80
  -2  -8  -7   10.60    3.60
  -2  -8  -7   13.80    4.60
   2   8   7    7.40    3.00
   2   8   7   30.20    5.00
   2   8   7   14.70    6.20
   2   8   7   12.70    3.80
  -2  -8  -8  429.56   13.30
  -2  -8  -8  452.55   13.90
  -2  -8  -8  451.95   17.00
   2   8   8  434.46   13.30
   2   8   8  462.95   16.90
   2   8   8  463.15   23.40
   2   8   8  432.96   13.70
  -2  -8  -9   24.20    4.90
  -2  -8  -9   21.70    4.00
  -2  -8  -9   31.00    5.90
   2   8   9   16.80    6.80
   2   8   9   16.40    4.50
  -2  -8 -10   12.80    5.00
  -2  -8 -10   13.60    4.10
   2   8  10   16.30    4.80
   2   8  10   20.30    6.60
   2   8  10    1.70    6.40
  -2  -8 -11   -2.90    4.00
  -2  -8 -11    0.00    5.30
   2   8  11  -10.90    6.80
   2   8  11    1.10    5.00
   2   8  11   10.20    7.00
  -2  -8 -12  344.77   13.80
   2   8  12  348.07   16.80
   2   8  12  347.77   13.40
   2   8  12  300.67   21.20
  -2  -8 -13   16.70    4.50
  -2  -8 -13   39.20    6.90
   2   8  13   28.00    6.20
   2   8  13   38.00    9.10
   2   8  13   11.80    8.50
  -2  -8 -14   15.10    7.20
   2   8  14  -11.00    8.60
   2   8  14   33.90    9.50
   2   8  14   11.60    6.30
  -2  -8 -15   30.70    7.80
   2   8  15   14.70    6.80
  -2  -8 -16   98.49    9.50
  -2  -8 -17    2.00    8.20
  -2  -8 -18    8.90    8.60
  -2  -7  19  -16.40    8.80
   2   7 -19   10.70    9.30
  -2  -7  18    0.80    8.50
   2   7 -18    2.40    8.60
  -2  -7  17  145.89   13.40
   2   7 -17  163.18   13.40
  -2  -7  16   17.20    8.00
   2   7 -16    8.10    7.70
  -2  -7  15    6.40    7.30
   2   7 -15    5.40    7.20
  -2  -7  14   16.60    7.10
   2   7 -14    7.60    6.80
  -2  -7  13  196.58   11.80
   2   7 -13  195.18   11.70
  -2  -7  12    3.80    5.90
   2   7 -12    8.00    6.00
  -2  -7  11   11.80    5.50
  -2  -7  11   12.30    6.20
   2   7 -11    4.60    5.00
   2   7 -11   13.60    5.40
  -2  -7  10   19.60    5.20
  -2  -7  10   26.10    5.80
   2   7 -10   27.20    5.40
   2   7 -10   17.20    4.90
  -2  -7   9  537.75   16.40
  -2  -7   9  520.25   19.10
  -2  -7   9  565.94   16.30
   2   7  -9  538.75   16.20
   2   7  -9  538.25   16.50
   2   7  -9  533.05   18.90
  -2  -7   8   39.30    5.20
  -2  -7   8   42.30    4.60
  -2  -7   8   38.80    4.90
   2   7  -8   34.80    4.40
   2   7  -8   35.00    4.80
   2   7  -8   35.50    4.70
  -2  -7   7    4.90    3.70
  -2  -7   7    1.40    4.00
   2   7  -7   -3.50    3.50
   2   7  -7    1.90    3.50
   2   7  -7    0.10    3.80
  -2  -7   6   16.80    3.90
  -2  -7   6   12.30    3.70
   2   7  -6    9.30    3.30
   2   7  -6   15.10    4.00
   2   7  -6   15.90    3.50
  -2  -7   5  432.96   12.80
   2   7  -5  427.66   12.70
   2   7  -5  432.66   13.00
  -2  -7   4   -2.30    2.10
  -2  -7   4   -4.40    3.00
  -2  -7   4   -4.00    3.40
   2   7  -4    3.00    2.80
   2   7  -4    3.20    3.30
  -2  -7   3   32.80    3.50
  -2  -7   3   26.90    3.50
  -2  -7   3   29.00    4.20
   2   7  -3   27.60    3.50
  -2  -7   2    8.70    3.80
  -2  -7   2    5.70    2.90
  -2  -7   2    3.90    2.80
   2   7  -2    4.60    2.60
   2   7  -2    7.10    4.40
   2   7  -2    3.30    2.90
  -2  -7   1  755.52   22.10
  -2  -7   1  762.02   19.20
  -2  -7   1  749.33   19.10
   2   7  -1  736.63   19.10
   2   7  -1  724.03   22.10
   2   7  -1  724.93   19.00
  -2  -7   0   53.79    4.80
  -2  -7   0   47.80    3.80
  -2  -7   0   53.69    5.00
   2   7   0   56.09    5.40
   2   7   0   52.99    4.80
   2   7   0   51.99    4.70
  -2  -7  -1  110.49    5.70
  -2  -7  -1   93.29    7.20
  -2  -7  -1   98.39    5.50
   2   7   1  100.79    7.60
   2   7   1   96.79    5.50
   2   7   1  109.79    5.60
  -2  -7  -2    3.60    2.80
  -2  -7  -2   -4.80    2.80
   2   7   2    3.60    4.20
   2   7   2    1.90    2.60
   2   7   2    3.10    2.60
  -2  -7  -3  563.84   15.20
  -2  -7  -3  545.75   14.90
   2   7   3  544.65   14.90
   2   7   3  565.14   15.10
   2   7   3  575.94   18.10
  -2  -7  -4   32.00    3.80
  -2  -7  -4   21.90    3.20
  -2  -7  -4   27.80    3.60
   2   7   4   21.70    3.30
   2   7   4   34.60    5.30
   2   7   4   25.30    3.30
  -2  -7  -5   27.20    3.40
  -2  -7  -5   20.00    3.40
  -2  -7  -5   31.50    3.60
   2   7   5   37.20    3.70
   2   7   5   28.50    3.40
   2   7   5   36.70    5.80
  -2  -7  -6    5.30    3.30
  -2  -7  -6   -2.40    3.20
  -2  -7  -6   13.10    4.00
   2   7   6    2.10    3.50
   2   7   6    2.40    2.90
   2   7   6    5.10    5.40
  -2  -7  -7  219.88    8.40
  -2  -7  -7  203.08    8.60
  -2  -7  -7  224.48   10.40
   2   7   7  230.88   14.60
   2   7   7  200.48    8.10
   2   7   7  224.58   10.40
   2   7   7  198.08    8.50
  -2  -7  -8    0.60    3.30
  -2  -7  -8    0.50    3.70
  -2  -7  -8   -4.30    4.50
   2   7   8    0.80    3.10
   2   7   8   -2.70    5.40
   2   7   8   -0.50    3.60
   2   7   8   12.20    5.00
  -2  -7  -9   42.30    4.90
  -2  -7  -9   59.69    6.50
  -2  -7  -9   69.59    6.10
   2   7   9   47.80    7.30
   2   7   9   48.00    5.00
  -2  -7 -10    4.10    6.00
  -2  -7 -10    6.00    3.70
  -2  -7 -10    5.60    4.60
   2   7  10   -3.40    6.10
   2   7  10    4.10    4.40
   2   7  10   23.30    6.40
  -2  -7 -11   87.99    6.60
  -2  -7 -11  139.29    9.40
   2   7  11  114.19   13.70
   2   7  11  152.58    9.30
   2   7  11  137.59   11.40
  -2  -7 -12   16.00    5.80
  -2  -7 -12   -2.00    2.50
   2   7  12    6.80    7.60
   2   7  12    9.60    5.50
   2   7  12   -8.70    7.20
  -2  -7 -13    5.80    5.80
  -2  -7 -13    3.20    4.60
   2   7  13   17.80    8.30
   2   7  13    7.10    5.80
   2   7  13   -7.30    7.60
  -2  -7 -14    3.50    6.40
   2   7  14    5.70    6.20
   2   7  14   -1.80    8.90
  -2  -7 -15   49.40    7.80
   2   7  15   48.50   10.90
   2   7  15   46.70    7.30
  -2  -7 -16   18.90    7.90
   2   7  16    8.80    7.10
  -2  -7 -17   15.00    8.20
  -2  -7 -18   -4.00    8.90
  -2  -7 -19   12.40    9.30
  -2  -6  20   -1.60    9.30
   2   6 -20   -1.20    9.20
  -2  -6  19  -14.40    8.50
   2   6 -19    4.90    8.70
  -2  -6  18   -1.90    8.30
   2   6 -18    6.60    8.30
  -2  -6  17   20.90    8.20
   2   6 -17   20.00    8.20
  -2  -6  16   25.50    7.90
   2   6 -16   38.40    8.10
  -2  -6  15    6.90    8.80
  -2  -6  15   -5.50    6.90
   2   6 -15    0.30    6.70
  -2  -6  14  106.99    8.60
  -2  -6  14  124.39   12.50
   2   6 -14  111.69   10.70
  -2  -6  13   -1.00    5.90
  -2  -6  13   -3.30    7.00
   2   6 -13    7.70    6.10
  -2  -6  12   12.50    6.60
  -2  -6  12    8.70    5.60
   2   6 -12    8.90    5.30
  -2  -6  11   -3.00    5.20
  -2  -6  11    2.00    5.80
   2   6 -11   -2.60    4.90
   2   6 -11    4.80    5.00
  -2  -6  10  169.38   10.40
  -2  -6  10  174.08    9.20
  -2  -6  10  172.58    9.10
   2   6 -10  160.98    9.80
   2   6 -10  169.08    9.20
   2   6 -10  166.08    8.80
  -2  -6   9   -1.30    4.40
  -2  -6   9   -9.80    3.60
  -2  -6   9   -1.90    4.80
   2   6  -9   -4.40    3.70
   2   6  -9    2.50    4.50
   2   6  -9  -10.80    4.00
  -2  -6   8  676.93   18.90
  -2  -6   8  691.23   18.80
  -2  -6   8  655.63   22.40
   2   6  -8  669.73   22.40
   2   6  -8  706.03   18.90
   2   6  -8  668.63   18.90
  -2  -6   7   30.80    4.30
  -2  -6   7   23.10    4.50
  -2  -6   7   24.40    4.00
   2   6  -7   27.80    4.10
   2   6  -7   27.80    4.10
   2   6  -7   26.40    3.90
  -2  -6   6 1051.69   26.70
  -2  -6   6 1074.09   26.60
  -2  -6   6  996.60   32.20
   2   6  -6 1055.69   26.60
   2   6  -6 1026.20   32.10
   2   6  -6 1086.29   26.70
  -2  -6   5   68.59    5.50
   2   6  -5   75.29    5.10
   2   6  -5   68.49    5.70
   2   6  -5   72.59    5.80
  -2  -6   4  104.69    6.20
  -2  -6   4   83.59    5.30
  -2  -6   4  103.29    5.80
   2   6  -4  105.19    5.50
   2   6  -4  104.49    5.90
  -2  -6   3   -0.70    2.60
  -2  -6   3   -0.50    3.20
  -2  -6   3    1.70    2.70
   2   6  -3   -0.80    1.40
   2   6  -3    3.80    2.80
  -2  -6   2   47.90    4.40
  -2  -6   2   55.59    4.70
  -2  -6   2   48.50    4.70
   2   6  -2   56.89    4.80
  -2  -6   1   10.10    2.90
  -2  -6   1   16.70    2.80
  -2  -6   1   11.30    3.80
   2   6  -1   15.00    2.90
   2   6  -1   10.40    4.10
   2   6  -1   13.80    2.50
  -2  -6   0  101.99    6.60
  -2  -6   0   95.39    5.10
  -2  -6   0   95.39    5.30
   2   6   0   96.99    5.10
   2   6   0   98.99    5.10
   2   6   0   92.39    6.90
  -2  -6  -1   -1.60    3.40
  -2  -6  -1    1.10    2.40
  -2  -6  -1   -1.80    2.60
   2   6   1   -1.00    2.40
   2   6   1   -1.80    2.50
   2   6   1   -3.80    3.70
  -2  -6  -2   21.30    3.00
  -2  -6  -2   19.20    2.80
   2   6   2   20.20    2.90
   2   6   2   30.80    4.30
   2   6   2   20.90    2.90
  -2  -6  -3   10.40    2.60
  -2  -6  -3   10.40    2.90
  -2  -6  -3   20.70    3.20
   2   6   3   22.90    2.90
   2   6   3   15.10    4.40
   2   6   3    8.30    2.60
   2   6   3   15.40    2.80
  -2  -6  -4  136.99    6.10
  -2  -6  -4  135.49    6.30
  -2  -6  -4  143.39    6.90
   2   6   4  131.49    6.10
   2   6   4  127.99    6.20
   2   6   4  141.79   10.70
   2   6   4  152.98    7.00
  -2  -6  -5    4.50    3.00
  -2  -6  -5    7.40    3.10
  -2  -6  -5    9.10    3.20
   2   6   5    3.00    3.10
   2   6   5   10.90    2.90
   2   6   5   23.60    3.90
   2   6   5   -3.00    5.00
  -2  -6  -6   25.40    3.50
  -2  -6  -6   19.70    3.30
  -2  -6  -6   29.30    4.40
   2   6   6   22.40    5.70
   2   6   6   19.70    3.20
   2   6   6   18.70    2.90
   2   6   6   39.40    4.70
  -2  -6  -7    0.00    2.90
  -2  -6  -7    0.30    3.10
  -2  -6  -7   -7.50    4.10
   2   6   7   -1.50    2.80
   2   6   7    1.30    3.20
   2   6   7    1.30    4.40
   2   6   7   -7.70    4.90
  -2  -6  -8   94.39    6.20
  -2  -6  -8   88.69    8.00
  -2  -6  -8   83.79    6.80
   2   6   8   66.89   10.00
   2   6   8  104.49    8.40
   2   6   8   82.69    6.10
   2   6   8   95.09    6.80
  -2  -6  -9  -11.60    4.80
  -2  -6  -9    5.00    4.00
  -2  -6  -9    3.00    3.30
   2   6   9    2.70    3.30
   2   6   9   -0.50    3.90
   2   6   9   -9.30    5.20
   2   6   9    0.30    5.30
  -2  -6 -10   42.70    4.80
  -2  -6 -10   46.00    4.40
  -2  -6 -10   46.70    6.80
   2   6  10   58.49    7.20
   2   6  10   31.80    7.20
   2   6  10   48.70    5.20
  -2  -6 -11    4.00    4.50
  -2  -6 -11    1.50    2.40
   2   6  11  -11.80    6.20
   2   6  11    5.50    4.80
   2   6  11    6.60    6.50
  -2  -6 -12    9.90    4.30
  -2  -6 -12   17.30    5.30
   2   6  12   -3.40    7.00
   2   6  12   16.10    7.60
   2   6  12   14.10    5.30
  -2  -6 -13   11.20    6.00
  -2  -6 -13    9.20    4.50
   2   6  13    2.40    5.50
   2   6  13    2.70    8.00
  -2  -6 -14   -2.70    6.30
  -2  -6 -14   -3.50    4.80
   2   6  14    7.00    6.00
   2   6  14    1.50    8.60
  -2  -6 -15    8.40    7.00
   2   6  15    3.00    9.50
   2   6  15   -2.40    6.20
  -2  -6 -16    0.90    7.40
   2   6  16    3.30    6.80
  -2  -6 -17   -1.30    8.00
  -2  -6 -18   -1.60    8.20
  -2  -6 -19    3.00    9.00
  -2  -5  20   -5.40    8.90
   2   5 -20    3.50    9.10
  -2  -5  19   -9.20    8.30
   2   5 -19   -7.40    8.30
  -2  -5  18    0.40    8.10
   2   5 -18   -2.00    8.00
  -2  -5  17   -1.20    7.50
   2   5 -17   -2.30    7.50
  -2  -5  16    8.40    9.30
  -2  -5  16    5.70    7.20
   2   5 -16    2.40    7.10
  -2  -5  15  126.09   13.20
  -2  -5  15  135.79   11.30
   2   5 -15  131.19   11.10
  -2  -5  14   22.10    8.10
  -2  -5  14   18.00    6.70
   2   5 -14   26.10    6.60
  -2  -5  13    0.90    7.10
  -2  -5  13    0.90    5.80
   2   5 -13    6.40    5.80
  -2  -5  12   -7.30    5.10
  -2  -5  12    1.80    6.20
   2   5 -12    4.40    5.10
  -2  -5  11  376.26   15.80
  -2  -5  11  375.86   13.30
   2   5 -11  365.66   12.90
   2   5 -11  375.76   13.20
  -2  -5  10   38.20    6.10
  -2  -5  10   34.60    5.10
  -2  -5  10   37.10    4.60
   2   5 -10   30.80    5.30
   2   5 -10   34.00    4.90
   2   5 -10   36.10    4.60
  -2  -5   9   14.00    4.20
  -2  -5   9   12.40    3.80
  -2  -5   9   10.20    4.90
   2   5  -9    7.80    4.40
   2   5  -9    9.20    3.60
   2   5  -9   16.80    4.30
  -2  -5   8   13.90    4.00
  -2  -5   8   13.10    3.70
  -2  -5   8   15.10    4.50
   2   5  -8   12.80    3.70
   2   5  -8   11.30    4.10
   2   5  -8   12.40    3.90
  -2  -5   7  927.01   24.10
  -2  -5   7  933.61   24.10
  -2  -5   7  911.71   29.30
   2   5  -7  918.81   24.10
   2   5  -7  960.10   24.10
   2   5  -7  952.60   29.40
  -2  -5   6   13.20    3.60
  -2  -5   6    7.90    3.60
  -2  -5   6    8.50    3.20
   2   5  -6    8.60    3.30
   2   5  -6    4.70    3.10
   2   5  -6    6.30    3.20
  -2  -5   5   -0.10    2.10
  -2  -5   5    7.90    3.10
   2   5  -5    1.90    3.00
   2   5  -5    6.20    2.80
   2   5  -5    0.50    2.80
  -2  -5   4    5.50    2.70
  -2  -5   4    0.30    2.60
   2   5  -4    1.70    2.70
   2   5  -4    1.00    2.40
   2   5  -4    0.20    1.80
  -2  -5   3  949.90   23.20
  -2  -5   3  938.91   23.20
  -2  -5   3  910.71   26.00
   2   5  -3  913.11   23.10
  -2  -5   2  128.19    5.70
  -2  -5   2  133.69    6.80
  -2  -5   2  134.49    5.90
   2   5  -2  140.39    5.90
  -2  -5   1  134.89    5.70
  -2  -5   1  140.39    6.90
  -2  -5   1  142.19    5.90
   2   5  -1  137.79    7.10
   2   5  -1  130.09    5.60
  -2  -5   0   15.50    3.60
  -2  -5   0   11.20    2.60
  -2  -5   0   10.50    2.60
   2   5   0   10.10    3.80
   2   5   0   13.60    2.40
   2   5   0   15.10    2.60
  -2  -5  -1  191.78    8.00
  -2  -5  -1  173.98    6.40
  -2  -5  -1  182.68    6.40
   2   5   1  181.78    6.30
   2   5   1  180.88    6.40
   2   5   1  182.68    7.90
  -2  -5  -2   18.50    2.60
  -2  -5  -2   18.30    2.80
   2   5   2   21.90    2.60
   2   5   2   15.80    4.20
   2   5   2   18.50    2.60
  -2  -5  -3  182.88    7.40
  -2  -5  -3  169.28    6.60
  -2  -5  -3  171.28    6.50
   2   5   3  164.48    6.50
   2   5   3  192.58   11.20
   2   5   3  210.98    7.40
   2   5   3  158.88    6.40
  -2  -5  -4   17.10    2.90
  -2  -5  -4   18.90    3.20
  -2  -5  -4   16.40    2.90
   2   5   4   14.50    2.90
   2   5   4   17.00    4.70
   2   5   4   13.70    2.70
   2   5   4   28.40    3.60
  -2  -5  -5    3.20    3.20
  -2  -5  -5    8.80    2.80
  -2  -5  -5    6.10    2.40
   2   5   5    9.20    4.60
   2   5   5   14.20    3.70
   2   5   5    6.80    2.60
   2   5   5    2.90    2.60
  -2  -5  -6   98.99    6.00
  -2  -5  -6   90.59    6.90
  -2  -5  -6  104.89    5.90
   2   5   6  105.39    5.70
   2   5   6  119.19    7.40
   2   5   6  104.39    6.00
   2   5   6   73.39    9.80
  -2  -5  -7  161.68    7.10
  -2  -5  -7  153.48    8.80
   2   5   7  146.19    7.20
   2   5   7  151.78    6.70
   2   5   7  142.59   11.20
   2   5   7  159.68    8.90
  -2  -5  -8   -1.80    4.50
  -2  -5  -8    2.70    3.00
  -2  -5  -8    3.20    3.10
   2   5   8   -2.90    5.10
   2   5   8    8.50    3.10
   2   5   8    6.30    3.60
   2   5   8   -0.10    4.80
  -2  -5  -9   -1.00    3.70
  -2  -5  -9    1.00    3.20
  -2  -5  -9   -6.20    4.70
   2   5   9   -7.90    5.20
   2   5   9    2.10    5.40
   2   5   9    2.90    3.20
   2   5   9    2.20    3.80
  -2  -5 -10   20.00    5.60
  -2  -5 -10   16.70    3.30
  -2  -5 -10   19.20    4.40
   2   5  10   12.90    6.10
   2   5  10   19.60    4.50
   2   5  10   22.20    6.40
  -2  -5 -11  104.49    8.20
   2   5  11   78.09   11.70
   2   5  11  110.79   10.70
   2   5  11  121.89    8.30
  -2  -5 -12   -3.80    4.80
  -2  -5 -12   -1.20    4.20
   2   5  12   -3.00    6.90
   2   5  12    3.60    5.00
  -2  -5 -13   37.70    5.30
  -2  -5 -13   42.10    6.30
   2   5  13   46.50    6.20
   2   5  13   32.50    8.50
  -2  -5 -14   53.19    7.00
  -2  -5 -14   38.80    5.30
   2   5  14   48.60    9.70
   2   5  14   52.59    6.80
  -2  -5 -15  159.48   11.80
   2   5  15  158.48   11.40
   2   5  15  142.39   14.80
  -2  -5 -16   10.40    7.30
   2   5  16    8.00    6.80
  -2  -5 -17   42.80    8.40
   2   5  17   26.70    7.70
  -2  -5 -18    3.70    8.30
  -2  -5 -19   18.30    9.20
  -2  -4  20    6.10    8.90
   2   4 -20   15.60    9.00
  -2  -4  19   -5.40    8.10
   2   4 -19    3.80    8.50
  -2  -4  18    0.70    7.90
  -2  -4  18   -0.10   10.60
   2   4 -18    7.20    8.00
  -2  -4  17   -4.50    9.50
  -2  -4  17   -1.40    7.50
   2   4 -17   -1.40    7.30
  -2  -4  16  242.48   13.20
  -2  -4  16  231.38   15.90
   2   4 -16  239.38   13.20
  -2  -4  15   10.20    6.60
  -2  -4  15    9.70    8.30
   2   4 -15    3.30    6.50
  -2  -4  14   -0.80    6.00
  -2  -4  14   10.70    7.70
   2   4 -14   -2.90    5.90
  -2  -4  13   -4.10    5.70
  -2  -4  13    0.00    6.90
   2   4 -13   -2.30    5.20
   2   4 -13   -0.70    5.50
  -2  -4  12  489.25   19.40
  -2  -4  12  490.35   16.00
   2   4 -12  474.45   15.80
   2   4 -12  506.05   15.60
  -2  -4  11   16.30    5.90
  -2  -4  11   10.70    4.70
   2   4 -11    6.60    4.40
   2   4 -11   14.80    4.20
   2   4 -11   12.70    5.00
  -2  -4  10  291.57   13.20
  -2  -4  10  316.37   11.00
  -2  -4  10  290.87   11.10
   2   4 -10  314.67   11.00
   2   4 -10  295.87   13.10
   2   4 -10  311.07   11.30
  -2  -4   9   -5.00    3.50
  -2  -4   9    2.10    4.60
  -2  -4   9   -1.10    3.80
   2   4  -9    0.50    3.50
   2   4  -9    2.50    4.30
   2   4  -9    2.20    3.90
  -2  -4   8 1120.39   28.50
  -2  -4   8 1141.39   28.40
  -2  -4   8 1070.59   35.00
   2   4  -8 1176.08   28.50
   2   4  -8 1107.89   35.10
   2   4  -8 1107.89   28.40
  -2  -4   7    1.30    3.60
  -2  -4   7    1.10    3.30
  -2  -4   7   -0.30    3.00
   2   4  -7    2.80    3.50
   2   4  -7    2.70    3.20
   2   4  -7    0.00    2.90
  -2  -4   6   39.40    3.60
  -2  -4   6   48.10    5.30
  -2  -4   6   43.60    3.90
   2   4  -6   54.89    5.40
   2   4  -6   46.70    3.80
  -2  -4   5   14.10    2.60
  -2  -4   5   19.70    3.40
  -2  -4   5   19.80    3.10
   2   4  -5   18.10    3.10
   2   4  -5   19.40    3.10
  -2  -4   4  685.93   17.50
  -2  -4   4  703.33   17.50
  -2  -4   4  651.83   21.00
   2   4  -4  700.53   17.50
   2   4  -4  673.93   17.50
   2   4  -4  678.33   21.10
  -2  -4   3   90.19    5.10
  -2  -4   3   95.29    5.10
   2   4  -3   91.69    4.80
   2   4  -3   84.69    5.00
  -2  -4   2    2.00    2.40
  -2  -4   2    4.60    3.20
  -2  -4   2    0.20    2.60
   2   4  -2    0.00    2.20
   2   4  -2    0.90    2.50
  -2  -4   1    1.80    2.50
  -2  -4   1   -0.30    2.20
   2   4  -1    0.20    2.30
   2   4  -1   -0.80    0.70
   2   4  -1  -14.10    3.60
  -2  -4   0  473.05   12.40
  -2  -4   0  471.75   12.30
  -2  -4   0  460.75   14.40
   2   4   0  472.85   12.30
   2   4   0  458.75   14.40
  -2  -4  -1   -2.50    2.30
  -2  -4  -1   -2.10    2.40
   2   4   1   -3.20    3.30
   2   4   1    1.70    2.30
   2   4   1   -2.20    2.10
  -2  -4  -2  124.89    5.40
  -2  -4  -2  117.19    5.20
  -2  -4  -2  132.39    5.70
   2   4   2  129.79    9.20
   2   4   2  130.39    5.40
   2   4   2  125.79    5.40
   2   4   2  127.39    6.70
  -2  -4  -3    5.20    2.50
  -2  -4  -3   10.00    2.60
  -2  -4  -3   10.40    2.90
   2   4   3    7.60    2.40
   2   4   3   10.10    4.20
   2   4   3    9.80    2.60
   2   4   3   14.80    2.70
  -2  -4  -4   74.29    4.60
  -2  -4  -4   78.79    4.90
  -2  -4  -4   86.39    5.70
   2   4   4   81.59    4.80
   2   4   4   96.89    5.90
   2   4   4   89.49    8.20
   2   4   4   79.49    4.60
  -2  -4  -5    1.40    2.50
  -2  -4  -5   -0.80    2.50
  -2  -4  -5    1.80    3.10
   2   4   5    0.50    3.80
   2   4   5    0.20    2.60
   2   4   5    4.10    3.50
   2   4   5    0.40    2.30
  -2  -4  -6  214.28   10.00
  -2  -4  -6  249.58    8.30
   2   4   6  247.88   10.50
   2   4   6  242.68   13.60
   2   4   6  250.77    8.20
   2   4   6  257.97    8.60
  -2  -4  -7   22.40    3.40
  -2  -4  -7   35.10    3.50
  -2  -4  -7   36.00    4.70
   2   4   7   37.50    5.20
   2   4   7   21.10    6.20
   2   4   7   28.30    3.40
   2   4   7   29.90    3.70
  -2  -4  -8  184.58    8.00
  -2  -4  -8  182.68    9.80
  -2  -4  -8  183.78    7.50
   2   4   8  187.68    8.10
   2   4   8  183.88   12.50
   2   4   8  180.58   10.20
   2   4   8  192.48    7.70
  -2  -4  -9    7.30    3.40
  -2  -4  -9   11.10    4.90
  -2  -4  -9    8.90    3.90
   2   4   9    5.30    3.90
   2   4   9    7.40    3.30
   2   4   9    3.00    5.10
   2   4   9    7.80    5.40
  -2  -4 -10  103.59    9.30
  -2  -4 -10  101.19    7.50
   2   4  10  110.99    7.50
   2   4  10   89.39   10.50
   2   4  10  121.29    7.30
   2   4  10  100.29    9.60
  -2  -4 -11    3.80    3.80
  -2  -4 -11    3.80    4.40
   2   4  11    7.30    4.60
   2   4  11    2.10    6.10
  -2  -4 -12  341.07   12.70
  -2  -4 -12  335.17   12.10
   2   4  12  318.07   16.10
   2   4  12  359.96   12.90
  -2  -4 -13   -1.20    5.50
  -2  -4 -13    0.80    4.00
   2   4  13    4.20    5.40
   2   4  13   -1.30    7.40
  -2  -4 -14   -1.70    5.90
  -2  -4 -14    6.50    4.50
   2   4  14   10.40    6.00
   2   4  14   -1.10    8.20
  -2  -4 -15    6.70    6.60
  -2  -4 -15   -8.70    4.60
   2   4  15   -0.90    6.30
  -2  -4 -16  236.78   13.30
   2   4  16  232.38   13.20
  -2  -4 -17    6.70    7.40
   2   4  17    7.50    7.40
  -2  -4 -18   -0.50    8.10
   2   4  18   -0.10    7.70
  -2  -4 -19    4.00    8.80
  -2  -4 -20  106.99   11.20
  -2  -3  20    1.30    8.60
   2   3 -20    3.40    8.60
  -2  -3  19    1.40   11.60
  -2  -3  19    8.00    8.50
   2   3 -19   13.80    8.50
  -2  -3  18    0.90   10.20
  -2  -3  18   -2.10    7.60
   2   3 -18   -8.50    7.50
  -2  -3  17  170.38   12.50
  -2  -3  17  166.18   15.30
   2   3 -17  156.58   12.40
  -2  -3  16    5.30    6.70
  -2  -3  16    7.00    8.90
   2   3 -16    0.40    6.60
  -2  -3  15    7.00    6.20
  -2  -3  15   -4.60    7.80
   2   3 -15    8.80    6.30
  -2  -3  14   -0.90    7.50
  -2  -3  14   -9.20    5.70
   2   3 -14   -5.50    5.10
   2   3 -14    0.70    5.70
  -2  -3  13  210.08   10.70
  -2  -3  13  205.18   13.10
   2   3 -13  204.78   10.50
  -2  -3  12    5.50    6.20
  -2  -3  12    0.60    4.80
   2   3 -12   -0.80    4.80
  -2  -3  11   96.69    9.30
  -2  -3  11   80.19    7.50
   2   3 -11   82.09    8.60
   2   3 -11   79.69    7.40
  -2  -3  10   -3.30    3.90
  -2  -3  10   -1.60    3.50
  -2  -3  10    9.70    4.90
   2   3 -10   -0.30    4.40
   2   3 -10    2.30    3.80
   2   3 -10    3.10    3.70
  -2  -3   9  679.23   23.20
  -2  -3   9  707.73   18.80
  -2  -3   9  700.13   18.90
   2   3  -9  720.33   18.90
   2   3  -9  659.13   18.80
   2   3  -9  687.33   23.30
  -2  -3   8   19.40    4.60
  -2  -3   8    8.50    3.50
  -2  -3   8   14.40    3.40
   2   3  -8   13.20    3.40
   2   3  -8   15.30    4.10
   2   3  -8   16.40    3.80
  -2  -3   7 1889.51   44.80
  -2  -3   7 1828.92   55.89
  -2  -3   7 1849.11   44.80
   2   3  -7 1831.82   44.80
   2   3  -7 1873.71   55.89
  -2  -3   6  138.39    6.60
  -2  -3   6  143.89    7.30
   2   3  -6  139.59    6.40
   2   3  -6  149.79    7.30
   2   3  -6  150.88    6.20
  -2  -3   5  722.03   18.50
  -2  -3   5  679.73   18.30
  -2  -3   5  703.03   22.70
   2   3  -5  790.12   18.60
   2   3  -5  731.03   18.50
   2   3  -5  716.43   22.60
  -2  -3   4    3.20    2.40
  -2  -3   4    4.80    2.50
  -2  -3   4    6.00    2.90
   2   3  -4    7.20    2.70
   2   3  -4    7.90    2.80
   2   3  -4    4.80    2.70
  -2  -3   3 4296.57   99.99
  -2  -3   3 4189.68  124.99
  -2  -3   3 4370.36   99.89
   2   3  -3 4323.87   99.89
   2   3  -3 4311.57  124.99
   2   3  -3 4181.18   99.89
  -2  -3   2  513.45   13.10
  -2  -3   2  500.85   13.10
   2   3  -2  509.25   13.10
   2   3  -2  500.05   13.10
  -2  -3   1 3702.03   98.19
  -2  -3   1 3728.23   87.19
  -2  -3   1 3762.72   87.19
   2   3  -1 3824.02   87.19
   2   3  -1 3697.93   98.19
   2   3  -1 3712.63   87.19
  -2  -3   0   17.70    3.00
  -2  -3   0   15.40    2.20
  -2  -3   0   17.40    2.20
   2   3   0   20.20    3.60
   2   3   0   14.80    3.10
   2   3   0   17.60    2.20
  -2  -3  -1 4912.81  113.39
  -2  -3  -1 4932.41  113.49
  -2  -3  -1 5083.79  141.99
   2   3   1 4384.26  193.58
   2   3   1 4938.71  127.69
   2   3   1 4975.00  113.39
  -2  -3  -2  127.29    5.80
  -2  -3  -2  119.29    5.20
  -2  -3  -2  125.29    5.30
   2   3   2  111.19    5.20
   2   3   2  123.69    4.90
   2   3   2  125.59    8.90
  -2  -3  -3 1429.66   42.90
  -2  -3  -3 1429.26   34.40
   2   3   3 1447.76   34.40
   2   3   3 1436.56   42.90
   2   3   3 1431.16   58.49
  -2  -3  -4    1.10    3.00
  -2  -3  -4    0.20    2.40
  -2  -3  -4    2.50    2.00
   2   3   4   -1.00    3.50
   2   3   4   -2.10    2.30
   2   3   4   -2.20    2.10
   2   3   4   -2.50    3.20
  -2  -3  -5  111.89    5.50
  -2  -3  -5  113.79    6.60
  -2  -3  -5  113.29    5.40
   2   3   5   97.89    8.50
   2   3   5  117.09    6.90
   2   3   5  112.69    5.30
   2   3   5  107.79    5.50
  -2  -3  -6    5.00    3.30
  -2  -3  -6   10.70    2.90
  -2  -3  -6   10.90    2.80
   2   3   6    5.90    2.90
   2   3   6   16.80    4.20
   2   3   6    9.50    2.70
   2   3   6    4.60    4.30
  -2  -3  -7   95.09    6.00
  -2  -3  -7   99.79    5.80
  -2  -3  -7   99.79    7.50
   2   3   7  100.49    6.20
   2   3   7   86.99    9.40
   2   3   7   93.89    7.80
   2   3   7  103.79    5.80
  -2  -3  -8   -3.10    4.20
  -2  -3  -8    7.80    3.00
  -2  -3  -8    2.90    3.20
   2   3   8    1.50    3.00
   2   3   8    3.20    3.40
   2   3   8   -4.40    4.30
   2   3   8   -1.40    4.80
  -2  -3  -9  196.98   10.50
  -2  -3  -9  207.88    8.70
   2   3   9  193.08    8.50
   2   3   9  195.38   10.90
   2   3   9  205.58    8.00
  -2  -3 -10   10.50    3.30
  -2  -3 -10   19.10    5.40
  -2  -3 -10   23.80    4.30
   2   3  10   18.40    3.60
   2   3  10   27.50    6.20
   2   3  10   23.50    4.40
  -2  -3 -11  156.68    8.80
  -2  -3 -11  164.08    8.10
   2   3  11  145.09   11.20
   2   3  11  147.39    8.70
  -2  -3 -12   -3.10    4.00
  -2  -3 -12   -0.30    4.80
   2   3  12    2.80    4.80
   2   3  12   -3.10    6.40
  -2  -3 -13   46.90    6.30
  -2  -3 -13   45.90    5.10
   2   3  13   47.40    6.20
   2   3  13   59.59    8.60
  -2  -3 -14    6.40    4.60
  -2  -3 -14    5.80    6.00
   2   3  14    6.50    8.20
   2   3  14    2.80    5.80
  -2  -3 -15   63.09    7.40
  -2  -3 -15   41.10    5.80
   2   3  15   49.00    7.30
  -2  -3 -16    9.80    6.90
   2   3  16    4.30    6.80
  -2  -3 -17   34.10    8.00
   2   3  17   25.40    7.70
  -2  -3 -18    7.30    8.00
   2   3  18    4.30    7.90
  -2  -3 -19   41.00    9.40
   2   3  19   48.10    9.60
  -2  -3 -20   12.90    9.20
  -2  -2  21   -1.00    8.90
   2   2 -21   -6.70    9.10
  -2  -2  20    0.90   11.80
  -2  -2  20    0.70    8.60
   2   2 -20    1.40    8.80
  -2  -2  19    3.30    8.20
  -2  -2  19    0.40   10.90
   2   2 -19   -0.10    8.00
  -2  -2  18   -1.30    9.90
  -2  -2  18   -2.30    7.50
   2   2 -18   -6.10    7.40
  -2  -2  17   24.10    9.80
  -2  -2  17   12.10    7.30
   2   2 -17   26.40    7.60
  -2  -2  16    5.30    8.70
  -2  -2  16    0.60    6.50
   2   2 -16    4.20    6.50
  -2  -2  15    0.40    8.00
  -2  -2  15   -0.10    5.90
   2   2 -15   -1.30    6.00
  -2  -2  14  -11.30    5.40
  -2  -2  14   -8.20    7.20
   2   2 -14   -3.20    5.40
  -2  -2  13    8.10    5.30
  -2  -2  13   17.20    6.80
   2   2 -13   14.40    5.30
   2   2 -13   10.90    4.50
  -2  -2  12    9.80    6.30
  -2  -2  12   10.70    4.70
   2   2 -12    3.70    4.60
   2   2 -12    2.00    3.90
  -2  -2  11   16.70    5.50
  -2  -2  11   13.40    3.20
  -2  -2  11   11.40    4.40
   2   2 -11    6.80    4.70
   2   2 -11   18.00    4.50
   2   2 -11   16.00    4.00
  -2  -2  10   14.30    4.10
  -2  -2  10   16.70    3.30
  -2  -2  10   18.10    5.00
   2   2 -10   18.40    4.10
   2   2 -10   17.60    4.60
   2   2 -10   17.80    3.70
  -2  -2   9   55.79    5.30
  -2  -2   9   76.79    7.60
  -2  -2   9   61.19    4.90
   2   2  -9   64.19    7.10
   2   2  -9   50.39    4.40
   2   2  -9   53.39    4.50
  -2  -2   8  270.97    9.20
  -2  -2   8  281.57   11.70
  -2  -2   8  278.47    9.60
   2   2  -8  262.37    9.50
   2   2  -8  289.27   11.60
  -2  -2   7    0.30    2.20
  -2  -2   7   -2.90    2.90
  -2  -2   7    4.50    3.60
   2   2  -7    1.90    3.00
   2   2  -7    2.30    3.50
  -2  -2   6   75.79    5.90
  -2  -2   6   61.29    4.90
   2   2  -6   63.49    4.70
   2   2  -6   60.09    4.90
   2   2  -6   73.39    5.70
  -2  -2   5   59.69    4.90
  -2  -2   5   77.79    5.50
   2   2  -5   71.09    4.80
   2   2  -5   74.79    5.60
   2   2  -5   53.79    4.90
  -2  -2   4   58.89    5.00
  -2  -2   4   61.49    4.50
   2   2  -4   67.09    5.10
   2   2  -4   54.69    4.60
  -2  -2   3    5.60    2.20
  -2  -2   3    9.80    2.50
  -2  -2   3    1.10    2.30
   2   2  -3    1.50    2.40
   2   2  -3    8.90    2.60
   2   2  -3    1.60    2.20
  -2  -2   2  244.68    8.00
  -2  -2   2  241.78    6.90
  -2  -2   2  242.28    6.90
   2   2  -2  245.98    7.00
   2   2  -2  236.58   11.20
   2   2  -2  230.48    6.80
  -2  -2   1   76.59    3.90
  -2  -2   1   77.49    3.40
  -2  -2   1   76.29    3.40
   2   2  -1   79.69    3.40
   2   2  -1   78.69    3.40
   2   2  -1   82.59    5.70
  -2  -2   0   69.29    3.70
  -2  -2   0   84.79    3.40
  -2  -2   0   72.79    5.60
  -2  -2   0   77.59    3.40
   2   2   0   66.69    5.30
   2   2   0   71.69    3.70
   2   2   0   73.59    3.30
   2   2   0   83.79    3.40
  -2  -2  -1    8.90    3.00
  -2  -2  -1    3.80    1.70
  -2  -2  -1    2.20    1.60
   2   2   1    1.90    1.60
   2   2   1    5.70    2.40
   2   2   1    2.10    1.10
  -2  -2  -2  275.77    7.30
  -2  -2  -2  245.48    7.20
  -2  -2  -2  227.98   12.10
  -2  -2  -2  233.08    8.60
   2   2   2  234.88   12.10
  -2  -2  -3    6.00    2.20
  -2  -2  -3    6.90    4.00
  -2  -2  -3    4.80    3.00
  -2  -2  -3    9.70    2.40
   2   2   3    8.80    2.40
   2   2   3    0.80    3.60
  -2  -2  -4  392.86   17.00
  -2  -2  -4  373.16   12.60
  -2  -2  -4  352.26   10.10
  -2  -2  -4  368.76   10.20
   2   2   4  338.37   16.80
   2   2   4  343.77   12.50
   2   2   4  354.96   10.20
  -2  -2  -5    8.40    2.60
  -2  -2  -5   10.40    3.90
  -2  -2  -5    9.20    2.70
  -2  -2  -5    3.60    3.20
   2   2   5    2.60    3.80
   2   2   5    7.60    2.70
   2   2   5   10.10    3.70
  -2  -2  -6   22.30    3.10
  -2  -2  -6   11.00    3.40
  -2  -2  -6   21.00    4.40
  -2  -2  -6   23.90    3.00
   2   2   6   24.20    4.10
   2   2   6   22.00    3.20
   2   2   6   19.00    4.20
  -2  -2  -7   26.40    4.40
  -2  -2  -7   19.90    4.80
  -2  -2  -7   26.00    3.20
  -2  -2  -7   23.00    3.50
   2   2   7   17.80    4.50
   2   2   7   21.90    2.90
   2   2   7   22.30    3.50
   2   2   7   21.10    4.60
  -2  -2  -8   71.59    7.40
  -2  -2  -8   72.89    5.50
  -2  -2  -8   73.19    6.20
   2   2   8   76.89    5.20
   2   2   8   74.89    6.20
   2   2   8   67.89    6.40
  -2  -2  -9    2.30    3.70
  -2  -2  -9   -0.40    4.50
  -2  -2  -9   -0.30    2.20
   2   2   9    2.30    2.80
   2   2   9   -2.50    3.70
   2   2   9   -0.80    4.90
  -2  -2 -10   12.60    4.90
  -2  -2 -10   18.50    4.40
  -2  -2 -10   19.20    3.70
   2   2  10   11.30    3.30
   2   2  10   13.00    5.70
   2   2  10   12.20    4.30
  -2  -2 -11    6.20    4.60
  -2  -2 -11    7.40    4.00
   2   2  11    7.90    5.70
   2   2  11   11.20    4.70
  -2  -2 -12    5.40    4.90
  -2  -2 -12    5.20    3.80
   2   2  12    6.20    5.00
   2   2  12    6.80    6.40
  -2  -2 -13   10.20    5.60
  -2  -2 -13    8.20    4.40
   2   2  13    5.20    7.40
   2   2  13    4.80    5.50
  -2  -2 -14    0.00    4.40
  -2  -2 -14   -5.30    5.80
   2   2  14   -1.70    5.70
  -2  -2 -15   -3.80    6.30
  -2  -2 -15    2.90    5.00
   2   2  15    1.30    6.40
  -2  -2 -16   -8.00    6.90
   2   2  16    4.10    6.80
  -2  -2 -17    2.20    7.50
   2   2  17    1.20    7.40
  -2  -2 -18    1.00    8.10
   2   2  18   -1.80    7.80
  -2  -2 -19    2.40    8.70
   2   2  19    6.00    8.40
  -2  -2 -20   11.90    9.20
  -2  -1  21   10.00   12.50
   2   1 -21    2.10    9.50
  -2  -1  20    6.00   11.80
  -2  -1  20    4.70    8.60
   2   1 -20    3.10    8.70
  -2  -1  19    6.00    8.00
  -2  -1  19    6.20   10.80
   2   1 -19   13.30    8.30
  -2  -1  18   -4.10   10.20
  -2  -1  18   -5.10    7.30
   2   1 -18   -5.20    7.30
  -2  -1  17   96.19   11.90
  -2  -1  17   98.69    8.80
   2   1 -17   94.79    8.70
  -2  -1  16   -6.70    6.20
  -2  -1  16    3.70    9.10
   2   1 -16    0.70    6.30
  -2  -1  15   11.10    6.10
  -2  -1  15    8.30    8.30
   2   1 -15   10.30    4.90
   2   1 -15   17.10    6.10
  -2  -1  14    1.20    7.20
  -2  -1  14   -2.10    5.40
   2   1 -14   -2.50    4.60
   2   1 -14   -5.10    5.30
  -2  -1  13  104.99    8.40
  -2  -1  13  113.59   11.00
   2   1 -13  110.09    8.60
   2   1 -13  102.59    7.80
  -2  -1  12   12.30    4.80
  -2  -1  12   14.50    5.90
   2   1 -12    3.40    3.90
   2   1 -12    6.00    4.70
  -2  -1  11    3.40    4.00
  -2  -1  11    5.40    5.40
  -2  -1  11    3.80    2.70
   2   1 -11    9.40    4.10
   2   1 -11    7.90    3.60
   2   1 -11    7.10    4.90
  -2  -1  10   28.10    3.20
  -2  -1  10   48.20    4.70
  -2  -1  10   55.29    6.30
   2   1 -10   41.00    4.00
   2   1 -10   41.00    5.30
   2   1 -10   41.00    4.40
  -2  -1   9   92.29    7.90
  -2  -1   9   86.89    6.50
   2   1  -9   99.89    7.60
   2   1  -9   81.19    6.30
  -2  -1   8    0.20    1.50
  -2  -1   8    6.20    4.20
  -2  -1   8    1.40    3.20
   2   1  -8   -0.30    3.00
   2   1  -8   -0.60    2.80
   2   1  -8    7.30    3.90
  -2  -1   7   11.20    3.00
  -2  -1   7   12.40    3.80
   2   1  -7   12.30    2.90
   2   1  -7   13.70    2.80
   2   1  -7   18.30    3.80
  -2  -1   6    7.40    3.40
  -2  -1   6    7.50    2.70
   2   1  -6   12.40    3.60
   2   1  -6    9.30    2.70
  -2  -1   5    9.70    3.30
  -2  -1   5    4.30    2.50
   2   1  -5   12.60    2.50
   2   1  -5    6.20    2.50
  -2  -1   4  369.86   12.60
  -2  -1   4  365.46   10.10
   2   1  -4  380.96   10.10
   2   1  -4  368.36   10.10
   2   1  -4  372.66   12.60
  -2  -1   3   11.70    1.90
  -2  -1   3   12.90    2.40
   2   1  -3   13.60    2.10
   2   1  -3   12.80    2.70
   2   1  -3   11.70    1.90
  -2  -1   2   19.50    1.60
  -2  -1   2   18.60    1.60
  -2  -1   2   24.00    2.10
   2   1  -2   14.80    2.20
   2   1  -2   19.60    1.60
   2   1  -2   19.50    1.70
  -2  -1   1  905.31   21.40
  -2  -1   1  883.01   36.50
  -2  -1   1  913.61   21.40
   2   1  -1  884.81   36.50
   2   1  -1  917.31   21.40
   2   1  -1  921.91   21.50
  -2  -1   0    4.80    1.20
  -2  -1   0    5.40    1.90
  -2  -1   0    6.40    1.10
   2   1   0    4.60    1.90
   2   1   0    6.40    1.20
   2   1   0    4.70    1.20
  -2  -1  -1  113.29    3.80
  -2  -1  -1  108.69    6.50
  -2  -1  -1  111.89    3.70
   2   1   1  100.49    6.10
   2   1   1  112.49    3.80
   2   1   1  109.69    3.70
  -2  -1  -2   61.69    6.30
  -2  -1  -2   66.19    3.40
  -2  -1  -2   68.69    3.60
   2   1   2   67.89    3.60
   2   1   2   62.99    3.50
   2   1   2   56.39    5.80
  -2  -1  -3  319.07    8.80
  -2  -1  -3  282.77   14.90
  -2  -1  -3  323.77   11.10
  -2  -1  -3  323.87    8.90
   2   1   3  320.57    8.70
   2   1   3  323.77    9.00
   2   1   3  287.87   14.60
  -2  -1  -4    0.00    4.00
  -2  -1  -4    4.00    2.50
  -2  -1  -4    3.00    2.60
  -2  -1  -4    4.60    3.10
   2   1   4    1.20    1.60
   2   1   4    3.00    2.60
   2   1   4    2.70    3.60
  -2  -1  -5   97.79    5.30
  -2  -1  -5   82.29    8.10
  -2  -1  -5   97.19    5.10
   2   1   5   92.89    7.50
   2   1   5   94.69    5.30
   2   1   5   90.79    6.30
  -2  -1  -6   92.49    8.50
  -2  -1  -6  105.09    5.20
  -2  -1  -6  101.69    5.70
   2   1   6  102.29    5.60
   2   1   6   97.49    6.80
  -2  -1  -7   80.09    5.80
  -2  -1  -7   70.89    6.90
  -2  -1  -7   75.49    5.20
   2   1   7   82.89    6.80
   2   1   7   75.49    5.80
  -2  -1  -8   36.20    4.00
  -2  -1  -8   40.60    5.30
   2   1   8   29.70    5.10
   2   1   8   40.50    4.10
  -2  -1  -9  256.47    9.20
  -2  -1  -9  256.87   11.80
  -2  -1  -9  272.67    9.60
   2   1   9  250.87    9.50
   2   1   9  242.38   11.80
  -2  -1 -10    1.70    3.90
  -2  -1 -10    2.40    3.30
  -2  -1 -10   -0.90    4.10
   2   1  10   -0.50    0.70
   2   1  10   -0.60    4.00
   2   1  10   -1.90    5.00
  -2  -1 -11  126.49    8.10
  -2  -1 -11  132.09    7.30
   2   1  11  116.79   10.00
   2   1  11  133.59    8.30
  -2  -1 -12   -3.00    3.70
  -2  -1 -12    0.70    4.80
   2   1  12    5.60    6.20
   2   1  12   -3.20    4.70
  -2  -1 -13   49.10    5.30
  -2  -1 -13   60.59    6.40
   2   1  13   56.69    6.20
  -2  -1 -14   -4.60    5.60
  -2  -1 -14   -6.70    4.50
   2   1  14   -3.50    5.60
  -2  -1 -15   66.09    7.50
   2   1  15   70.19    7.50
  -2  -1 -16    7.30    7.00
   2   1  16    2.20    7.00
  -2  -1 -17    0.90    7.50
   2   1  17   -4.80    7.40
  -2  -1 -18   -0.40    8.10
   2   1  18   -2.00    7.70
  -2  -1 -19   16.60    9.00
   2   1  19   25.50    8.70
  -2  -1 -20   -0.90    9.10
   2   1  20   -7.00    8.80
  -2   0  21    6.20   12.30
   2   0 -21    1.60    9.00
  -2   0  20   39.90   12.10
  -2   0  20   44.00    9.10
   2   0 -20   38.90    9.30
  -2   0  19   -2.80    7.60
  -2   0  19   -4.50   10.50
   2   0 -19   -3.20    7.90
  -2   0  18   -2.10    7.20
  -2   0  18    4.70   10.40
   2   0 -18    2.80    7.60
  -2   0  17    3.80    9.80
  -2   0  17    6.80    6.90
   2   0 -17    8.60    7.10
  -2   0  16  149.79   11.00
  -2   0  16  135.99   14.00
   2   0 -16  147.59   10.90
   2   0 -16  147.49    9.90
  -2   0  15   -7.80    5.70
  -2   0  15   -3.70    7.70
   2   0 -15   -0.10    4.50
   2   0 -15   -6.40    5.70
  -2   0  14    6.80    7.70
  -2   0  14    0.60    5.30
   2   0 -14    4.90    5.40
   2   0 -14   -2.50    4.30
  -2   0  13    1.90    6.20
  -2   0  13   -4.20    4.70
   2   0 -13   -1.50    4.00
   2   0 -13   -1.20    4.70
  -2   0  12  482.55   15.00
  -2   0  12  488.35   19.00
   2   0 -12  473.35   14.90
   2   0 -12  479.05   14.60
  -2   0  11   -4.20    5.30
  -2   0  11   -6.70    3.80
  -2   0  11   -0.50    3.10
   2   0 -11    1.10    4.60
   2   0 -11   -2.20    3.90
   2   0 -11   -2.50    3.00
  -2   0  10   70.39    5.80
  -2   0  10   68.99    6.40
  -2   0  10   76.89    8.30
   2   0 -10   67.39    6.30
   2   0 -10   71.29    7.80
  -2   0   9   -8.50    3.20
  -2   0   9   -6.10    2.70
  -2   0   9    0.60    4.30
   2   0  -9   -9.00    2.80
   2   0  -9   -9.40    3.20
   2   0  -9   -1.90    3.80
  -2   0   8  995.20   25.10
  -2   0   8  971.20   31.70
  -2   0   8 1021.60   25.00
   2   0  -8  993.80   25.10
   2   0  -8 1022.90   31.80
   2   0  -8 1008.90   25.00
  -2   0   7   -1.30    2.30
  -2   0   7    1.80    3.50
  -2   0   7   -0.40    2.60
   2   0  -7    1.10    3.20
   2   0  -7   -2.20    2.50
   2   0  -7   -1.50    2.70
  -2   0   6 1044.60   32.70
  -2   0   6 1082.19   25.80
  -2   0   6 1056.49   25.80
   2   0  -6 1077.29   25.80
   2   0  -6 1034.30   25.80
  -2   0   5   -2.30    2.30
  -2   0   5   -1.60    2.20
  -2   0   5   -2.60    3.00
   2   0  -5    1.30    2.80
   2   0  -5   -1.70    2.30
   2   0  -5   -2.60    2.30
  -2   0   4    8.20    2.20
  -2   0   4    7.20    3.00
  -2   0   4    4.30    2.20
   2   0  -4   13.30    2.10
   2   0  -4    3.80    2.10
   2   0  -4    9.50    2.60
  -2   0   3    0.80    2.30
  -2   0   3   -0.80    1.50
   2   0  -3   -0.60    1.60
   2   0  -3    0.00    1.50
   2   0  -3    1.50    1.60
  -2   0   2   95.79    4.20
  -2   0   2   94.29    3.10
  -2   0   2   92.39    3.10
   2   0  -2   91.49    3.10
   2   0  -2   99.59    3.20
  -2   0   1    0.30    0.80
  -2   0   1   -1.20    1.10
  -2   0   1   -0.10    0.50
   2   0  -1   -0.80    0.70
   2   0  -1   -0.40    0.80
   2   0  -1    0.20    1.30
  -2   0   0 4926.31  196.28
  -2   0   0 5078.29  115.19
   2   0   0 4988.90  115.09
   2   0   0 4317.37  195.88
   2   0   0 5137.89  115.19
  -2   0  -1    0.50    1.10
  -2   0  -1    0.20    1.20
  -2   0  -1   -0.70    1.70
   2   0   1    0.40    1.10
   2   0   1    0.30    1.10
   2   0   1    0.30    1.60
  -2   0  -2  171.28    8.70
  -2   0  -2  174.38    5.40
  -2   0  -2  175.08    5.40
   2   0   2  168.28    8.70
   2   0   2  173.98    5.40
   2   0   2  173.38    5.40
  -2   0  -3    3.90    2.90
  -2   0  -3   -0.20    2.70
  -2   0  -3   -1.10    2.20
  -2   0  -3   -2.30    2.20
   2   0   3   -2.90    2.20
   2   0   3   -4.70    2.10
   2   0   3    0.10    3.00
  -2   0  -4  290.67   13.90
  -2   0  -4  280.67    8.80
  -2   0  -4  293.77    8.70
   2   0   4  286.37    8.70
   2   0   4  290.17    8.60
   2   0   4  282.87   13.70
  -2   0  -5    0.10    3.30
  -2   0  -5    1.50    2.40
  -2   0  -5   -0.80    1.00
  -2   0  -5    2.50    2.70
   2   0   5    1.60    1.80
   2   0   5    2.80    3.10
   2   0   5   -0.10    2.50
  -2   0  -6   65.89    7.50
  -2   0  -6   73.39    4.90
  -2   0  -6   78.69    5.30
   2   0   6   70.59    5.20
  -2   0  -7    0.20    0.90
  -2   0  -7    0.90    3.10
  -2   0  -7    3.10    2.40
   2   0   7    0.30    3.70
   2   0   7    3.60    2.60
   2   0   7   -1.90    2.90
  -2   0  -8  583.94   16.10
   2   0   8  577.14   15.90
   2   0   8  561.84   16.00
  -2   0  -9   -0.80    1.00
  -2   0  -9   -0.90    3.60
  -2   0  -9    3.90    3.10
   2   0   9   -1.90    3.60
   2   0   9    0.90    3.00
   2   0   9   -7.50    4.30
  -2   0 -10    5.50    4.00
  -2   0 -10    1.30    1.60
  -2   0 -10    3.60    3.40
   2   0  10    4.60    5.10
   2   0  10    3.40    4.00
   2   0  10   -0.80    3.10
  -2   0 -11    1.40    4.40
  -2   0 -11    1.90    3.50
   2   0  11   -1.70    4.20
  -2   0 -12  786.42   21.80
  -2   0 -12  730.13   21.10
   2   0  12  763.92   21.60
  -2   0 -13   -0.60    4.20
  -2   0 -13    3.00    5.40
   2   0  13    7.90    5.40
  -2   0 -14   13.60    5.20
  -2   0 -14   27.20    6.40
   2   0  14   22.90    6.30
  -2   0 -15    3.10    6.20
   2   0  15   -7.60    6.10
  -2   0 -16  207.78   12.80
   2   0  16  221.98   12.80
  -2   0 -17    6.00    7.30
   2   0  17   -7.10    7.10
  -2   0 -18   38.70    8.60
   2   0  18   51.09    8.70
  -2   0 -19   -5.80    8.40
   2   0  19   -4.80    8.40
  -2   0 -20   22.70    9.50
   2   0  20   -0.40    9.20
  -2   1  21   17.00   13.00
   2  -1 -21    5.10    9.20
  -2   1  20   -9.70   10.90
   2  -1 -20   -7.50    8.20
  -2   1  19    8.60    7.80
  -2   1  19   15.20   10.90
   2  -1 -19    6.50    8.10
  -2   1  18  -13.30    6.90
  -2   1  18    4.80    9.90
   2  -1 -18   -5.30    7.40
  -2   1  17   97.89   12.00
  -2   1  17   82.29    8.20
   2  -1 -17   86.79    8.50
  -2   1  16   -0.40    8.80
  -2   1  16   -3.50    6.00
   2  -1 -16    2.40    4.80
   2  -1 -16    3.10    6.50
  -2   1  15   16.00    6.00
  -2   1  15    4.60    8.30
   2  -1 -15    7.10    5.00
   2  -1 -15    7.70    6.00
  -2   1  14    8.40    7.50
  -2   1  14    1.10    5.20
   2  -1 -14    0.90    5.30
   2  -1 -14   -3.60    4.30
  -2   1  13  108.59   10.90
  -2   1  13   93.69    8.00
   2  -1 -13  105.99    7.70
   2  -1 -13  109.99    8.40
  -2   1  12   15.70    6.30
  -2   1  12   13.00    4.40
   2  -1 -12    7.70    3.50
   2  -1 -12   16.70    4.60
  -2   1  11    5.10    5.60
  -2   1  11    3.90    3.40
  -2   1  11    2.70    3.80
   2  -1 -11    0.80    2.50
   2  -1 -11   -0.90    1.30
   2  -1 -11   -6.10    3.80
  -2   1  10   56.09    6.00
  -2   1  10   47.00    4.10
  -2   1  10   57.79    4.60
   2  -1 -10   51.49    4.50
   2  -1 -10   54.49    4.20
  -2   1   9   89.29    7.80
  -2   1   9   80.89    5.70
  -2   1   9   75.39    5.80
   2  -1  -9   82.69    5.70
   2  -1  -9   70.29    6.00
  -2   1   8    2.00    2.90
  -2   1   8    6.00    4.10
  -2   1   8    2.00    2.80
   2  -1  -8    0.60    1.60
   2  -1  -8    0.90    2.70
   2  -1  -8    1.00    3.00
  -2   1   7   10.90    2.60
  -2   1   7    4.80    2.60
  -2   1   7   13.70    3.90
   2  -1  -7   11.90    2.70
   2  -1  -7   -0.10    1.40
   2  -1  -7    4.90    2.70
  -2   1   6    8.10    2.40
  -2   1   6    9.60    2.40
  -2   1   6   11.90    3.60
   2  -1  -6    8.50    2.40
   2  -1  -6    8.50    2.40
  -2   1   5    9.90    3.40
  -2   1   5    6.40    2.20
   2  -1  -5    5.10    2.20
   2  -1  -5    5.40    2.20
  -2   1   4  370.36    9.70
  -2   1   4  382.46   12.80
  -2   1   4  373.36    9.70
   2  -1  -4  366.66    9.70
   2  -1  -4  386.16   12.80
   2  -1  -4  370.46    9.70
  -2   1   3   11.70    1.60
  -2   1   3   11.50    1.50
  -2   1   3   14.50    2.60
   2  -1  -3   11.50    1.50
   2  -1  -3   14.20    2.80
   2  -1  -3   12.10    1.50
  -2   1   2   15.30    2.20
  -2   1   1  891.01   35.60
   2  -1  -1  871.91   35.60
  -2   1   0    4.80    0.90
  -2   1   0    5.40    1.90
  -2   1   0    5.60    1.00
   2  -1   0    6.80    1.00
   2  -1   0    5.20    1.70
   2  -1   0    5.30    0.90
  -2   1  -1  112.39    3.70
  -2   1  -1  116.29    6.40
   2  -1   1  113.29    3.70
   2  -1   1  108.89    3.60
   2  -1   1  108.59    6.10
  -2   1  -2   67.29    3.50
  -2   1  -2   63.89    3.50
  -2   1  -2   71.69    5.80
   2  -1   2   66.59    5.70
   2  -1   2   67.99    3.60
   2  -1   2   65.39    3.50
  -2   1  -3  315.17    8.80
  -2   1  -3  307.27   14.30
  -2   1  -3  298.07    8.70
   2  -1   3  306.57   14.30
   2  -1   3  305.87    8.80
   2  -1   3  299.07    8.70
  -2   1  -4    6.10    2.60
  -2   1  -4    2.30    3.20
  -2   1  -4    0.00    2.60
  -2   1  -4    8.20    3.50
   2  -1   4    8.50    3.30
   2  -1   4    4.40    2.60
   2  -1   4    4.40    2.60
  -2   1  -5   98.89    5.50
  -2   1  -5   94.99    4.90
  -2   1  -5   87.69    7.50
  -2   1  -5   89.59    6.20
   2  -1   5   98.69    5.10
   2  -1   5   97.09    7.50
   2  -1   5   89.79    5.30
  -2   1  -6   98.89    6.80
  -2   1  -6  114.69    5.40
  -2   1  -6   96.49    7.90
  -2   1  -6  104.79    5.80
   2  -1   6  103.59    7.80
   2  -1   6   94.09    5.80
  -2   1  -7   77.29    6.90
  -2   1  -7   89.39    5.90
   2  -1   7   76.29    5.80
   2  -1   7   90.89    6.00
  -2   1  -8   41.30    3.90
  -2   1  -8   41.80    4.20
  -2   1  -8   38.20    5.10
   2  -1   8   36.60    4.20
   2  -1   8   41.60    4.00
  -2   1  -9  260.27   12.10
  -2   1  -9  268.77    9.60
  -2   1  -9  258.97    9.80
   2  -1   9  258.57    9.90
   2  -1   9  274.47    9.80
  -2   1 -10    0.80    4.80
  -2   1 -10    2.90    4.00
  -2   1 -10    0.60    3.40
   2  -1  10   -0.60    4.00
   2  -1  10   -1.00    3.40
  -2   1 -11  134.79    7.70
  -2   1 -11  129.89    8.60
   2  -1  11  137.69    8.60
  -2   1 -12    0.80    4.00
  -2   1 -12   -0.10    4.80
   2  -1  12    2.50    4.90
  -2   1 -13   49.50    5.70
  -2   1 -13   58.29    6.50
   2  -1  13   51.89    6.50
  -2   1 -14   -2.70    6.00
   2  -1  14   -1.30    5.90
  -2   1 -15   65.89    7.70
   2  -1  15   69.29    7.70
  -2   1 -16    6.00    6.90
   2  -1  16    8.20    6.90
  -2   1 -17   -2.60    7.30
   2  -1  17    2.80    7.50
  -2   1 -18   11.80    8.00
   2  -1  18    8.70    7.80
  -2   1 -19   18.90    8.60
   2  -1  19   22.30    8.70
  -2   1 -20   -1.40    8.90
   2  -1  20    2.70    9.00
  -2   2  21    4.80   11.80
   2  -2 -21   -7.90    9.30
  -2   2  20    4.10   11.20
   2  -2 -20    0.80    8.70
  -2   2  19  -10.70   10.70
  -2   2  19   -2.20    7.70
   2  -2 -19   -4.50    8.00
  -2   2  18    2.10   10.60
  -2   2  18    2.50    7.00
   2  -2 -18    1.70    7.50
  -2   2  17   21.50    9.90
  -2   2  17   21.60    7.00
   2  -2 -17   10.10    7.20
  -2   2  16    2.70    9.10
  -2   2  16   -2.00    6.00
   2  -2 -16    4.30    5.00
   2  -2 -16   -4.10    6.30
  -2   2  15   -1.30    8.10
  -2   2  15   -6.90    5.40
   2  -2 -15    5.20    4.60
   2  -2 -15    6.30    6.00
  -2   2  14   -2.90    5.00
  -2   2  14   -0.60    7.30
   2  -2 -14   -1.30    5.40
   2  -2 -14   -2.80    4.20
  -2   2  13   14.40    6.90
  -2   2  13   12.00    4.80
   2  -2 -13   15.90    4.90
   2  -2 -13    9.30    3.90
  -2   2  12   11.80    4.30
  -2   2  12   13.80    6.40
   2  -2 -12    3.40    2.50
   2  -2 -12    2.90    4.30
  -2   2  11   10.70    3.50
  -2   2  11   19.30    6.10
  -2   2  11   14.30    4.00
   2  -2 -11   11.90    4.10
   2  -2 -11   12.60    5.20
   2  -2 -11   12.70    3.50
  -2   2  10   11.60    3.30
  -2   2  10   22.20    3.80
  -2   2  10   21.20    5.30
   2  -2 -10   15.40    3.40
   2  -2 -10   12.60    4.80
   2  -2 -10   14.10    3.70
  -2   2   9   53.69    4.20
  -2   2   9   53.09    4.30
  -2   2   9   73.09    7.60
   2  -2  -9   52.89    4.20
   2  -2  -9   55.89    4.20
   2  -2  -9   62.49    7.40
  -2   2   8  287.47   11.90
  -2   2   8  268.47    8.90
  -2   2   8  289.07    8.90
   2  -2  -8  278.87   11.90
   2  -2  -8  282.57    8.90
   2  -2  -8  271.37    8.90
  -2   2   7   -6.00    2.50
  -2   2   7   -8.20    2.40
  -2   2   7    0.70    3.70
   2  -2  -7   -2.30    2.50
   2  -2  -7   -9.30    2.50
   2  -2  -7    1.90    3.30
  -2   2   6   67.59    4.10
  -2   2   6   62.99    5.90
  -2   2   6   56.59    4.10
   2  -2  -6   57.29    4.10
   2  -2  -6   63.49    4.20
  -2   2   5   53.29    3.80
  -2   2   5   80.89    5.90
  -2   2   5   67.89    3.90
   2  -2  -5   62.49    3.80
   2  -2  -5   65.99    3.90
   2  -2  -5   81.19    5.80
  -2   2   4   51.09    5.30
   2  -2  -4   69.99    5.80
  -2   2   3    5.80    2.80
   2  -2  -3    5.30    3.10
  -2   2   1   71.99    3.50
  -2   2   0   67.29    3.40
  -2   2   0   66.49    5.60
  -2   2   0   73.49    2.60
  -2   2   0   68.89    2.60
   2  -2   0   66.99    2.60
   2  -2   0   71.39    3.60
   2  -2   0   74.89    2.60
  -2   2  -1    5.20    1.40
  -2   2  -1    6.50    3.00
  -2   2  -1    5.30    1.60
   2  -2   1    6.50    1.60
   2  -2   1    6.80    1.60
  -2   2  -2  217.58   11.60
  -2   2  -2  240.08    6.80
   2  -2   2  227.78   11.60
   2  -2   2  232.08    6.80
   2  -2   2  233.78    6.90
  -2   2  -3    9.00    3.80
  -2   2  -3    9.90    2.50
  -2   2  -3   11.20    2.50
   2  -2   3    6.20    2.50
   2  -2   3    6.20    3.50
   2  -2   3    7.40    2.50
  -2   2  -4  376.46   10.20
  -2   2  -4  379.46   13.00
  -2   2  -4  356.56   16.90
  -2   2  -4  357.96   10.40
   2  -2   4  354.36   16.80
   2  -2   4  359.26   10.40
   2  -2   4  375.16   10.40
  -2   2  -5    5.90    2.40
  -2   2  -5    7.80    3.50
  -2   2  -5    7.80    2.90
  -2   2  -5    8.80    3.70
   2  -2   5    8.80    2.80
   2  -2   5    7.80    2.50
   2  -2   5    6.10    3.50
  -2   2  -6   25.60    4.10
  -2   2  -6   16.80    4.10
  -2   2  -6   25.00    3.40
   2  -2   6   23.80    3.40
   2  -2   6   22.30    4.00
  -2   2  -7   26.90    4.40
  -2   2  -7   24.50    3.30
  -2   2  -7   23.20    3.70
  -2   2  -7   18.20    4.50
   2  -2   7   22.00    3.40
   2  -2   7   20.60    4.30
   2  -2   7   24.40    3.70
  -2   2  -8   82.49    5.90
  -2   2  -8   72.09    6.60
  -2   2  -8   66.39    6.10
   2  -2   8   82.59    6.10
   2  -2   8   78.49    6.50
  -2   2  -9   -4.60    3.20
  -2   2  -9   -5.90    3.80
  -2   2  -9   -3.30    4.50
   2  -2   9   -2.60    3.90
   2  -2   9    2.70    3.40
  -2   2 -10   15.40    3.70
  -2   2 -10   12.40    4.40
  -2   2 -10   14.40    5.00
   2  -2  10   23.00    4.60
   2  -2  10   21.00    4.10
  -2   2 -11   11.10    4.60
  -2   2 -11    4.00    3.80
   2  -2  11   10.30    4.70
  -2   2 -12   12.80    5.20
  -2   2 -12    7.30    4.40
   2  -2  12    4.80    5.20
  -2   2 -13    5.40    5.70
   2  -2  13    4.50    5.80
  -2   2 -14    3.60    6.10
   2  -2  14   -3.70    6.00
  -2   2 -15    3.00    6.60
   2  -2  15    7.00    6.60
  -2   2 -16    1.50    7.10
   2  -2  16    1.40    7.00
  -2   2 -17    9.70    8.00
   2  -2  17   -6.90    7.30
  -2   2 -18   -1.30    8.10
   2  -2  18   -8.10    8.00
  -2   2 -19    0.60    8.30
   2  -2  19   -5.10    8.30
  -2   2 -20   -1.50    8.80
   2  -2  20    0.70    8.80
  -2   3  20   -5.80   10.90
   2  -3 -20   -4.90    8.40
  -2   3  19   13.90   11.40
   2  -3 -19    5.50    8.20
  -2   3  18  -13.90   10.10
  -2   3  18   -4.30    6.80
   2  -3 -18   -1.30    7.40
  -2   3  17  170.38   11.50
  -2   3  17  156.58   15.90
   2  -3 -17  181.08   12.00
  -2   3  16   -8.90    8.90
  -2   3  16   -4.20    5.80
   2  -3 -16    3.90    5.00
   2  -3 -16   -0.20    6.30
  -2   3  15    0.20    8.20
  -2   3  15   -3.40    5.30
   2  -3 -15    5.20    4.50
   2  -3 -15    7.60    5.90
  -2   3  14   -1.60    5.00
  -2   3  14    4.70    7.50
   2  -3 -14    4.70    5.40
   2  -3 -14    1.10    4.20
  -2   3  13  208.78   13.40
  -2   3  13  224.98   10.00
   2  -3 -13  219.68   10.10
  -2   3  12    8.80    6.30
  -2   3  12   -3.60    4.10
   2  -3 -12   -0.30    3.50
   2  -3 -12   -5.70    4.40
  -2   3  11   78.69    6.30
  -2   3  11   80.49    9.20
  -2   3  11   75.39    6.50
   2  -3 -11   86.89    7.00
   2  -3 -11   85.59    6.00
   2  -3 -11   80.69    9.20
  -2   3  10   -2.30    3.10
  -2   3  10    4.70    5.10
  -2   3  10    2.30    3.40
   2  -3 -10   -3.00    4.50
   2  -3 -10   -4.40    3.00
   2  -3 -10    0.00    3.70
  -2   3   9  710.33   17.90
  -2   3   9  666.13   17.90
  -2   3   9  678.73   23.30
   2  -3  -9  684.63   23.30
   2  -3  -9  698.23   17.80
   2  -3  -9  663.43   18.00
  -2   3   8   14.40    4.40
  -2   3   8    5.70    2.80
  -2   3   8    9.00    3.00
   2  -3  -8   11.60    2.80
   2  -3  -8   15.20    4.50
   2  -3  -8   11.80    3.10
  -2   3   7 1889.41   43.70
  -2   3   7 1815.62   55.69
  -2   3   7 1792.82   43.70
   2  -3  -7 1856.31   43.70
   2  -3  -7 1886.81   55.79
   2  -3  -7 1793.12   43.70
  -2   3   6  136.99    7.50
  -2   3   6  140.59    5.10
  -2   3   6  138.39    5.20
   2  -3  -6  141.29    5.10
   2  -3  -6  134.79    5.30
  -2   3   5  728.63   24.00
   2  -3  -5  791.12   24.20
  -2   3   4    6.40    3.00
   2  -3  -4    9.80    3.40
  -2   3   3 4277.97  125.39
  -2   3   1 3717.23   97.59
  -2   3   0   12.10    2.80
  -2   3   0   22.70    1.70
  -2   3   0   17.90    1.70
   2  -3   0   18.70    1.70
   2  -3   0   19.90    1.70
   2  -3   0   18.60    2.90
  -2   3  -1 5101.79  118.89
  -2   3  -1 5186.08  118.89
   2  -3   1 5094.49  118.89
   2  -3   1 5185.78  118.89
   2  -3   1 5007.70  133.89
  -2   3  -2  129.79    9.20
  -2   3  -2  125.49    5.10
   2  -3   2  126.79    5.20
   2  -3   2  129.69    5.20
  -2   3  -3 1414.06   34.30
  -2   3  -3 1442.06   58.49
   2  -3   3 1414.16   34.30
   2  -3   3 1459.55   34.40
  -2   3  -4   -4.80    3.80
  -2   3  -4   -0.10    1.80
  -2   3  -4   -1.60    2.50
   2  -3   4   -1.00    2.50
   2  -3   4   -0.30    2.40
  -2   3  -5  125.49    6.00
  -2   3  -5  114.99    7.00
  -2   3  -5  107.59    8.90
   2  -3   5  123.19    5.90
   2  -3   5  123.89    5.70
  -2   3  -6    7.00    4.30
  -2   3  -6   10.60    3.90
  -2   3  -6    9.80    3.20
  -2   3  -6   12.90    2.80
   2  -3   6   14.80    3.30
   2  -3   6    1.40    2.40
  -2   3  -7   98.69    7.40
  -2   3  -7  102.29    6.60
  -2   3  -7   92.09    8.70
  -2   3  -7   99.99    6.00
   2  -3   7   99.79    6.50
   2  -3   7   90.49    6.20
  -2   3  -8   -2.60    4.20
  -2   3  -8    0.40    3.30
  -2   3  -8    4.00    3.80
   2  -3   8    2.30    3.30
   2  -3   8    6.50    3.80
  -2   3  -9  211.38    9.10
  -2   3  -9  202.48    8.90
  -2   3  -9  203.18   10.60
   2  -3   9  210.38    9.10
   2  -3   9  213.98    8.90
  -2   3 -10   20.80    4.10
  -2   3 -10   30.50    4.90
  -2   3 -10   26.20    5.70
   2  -3  10   25.30    4.80
   2  -3  10   16.50    4.00
  -2   3 -11  158.48    9.20
  -2   3 -11  158.28    8.70
   2  -3  11  160.68    9.40
  -2   3 -12    1.60    5.20
   2  -3  12   -7.30    5.20
  -2   3 -13   54.29    6.60
   2  -3  13   58.49    7.00
  -2   3 -14    3.40    6.20
   2  -3  14    4.90    6.30
  -2   3 -15   57.09    7.60
   2  -3  15   61.59    7.70
  -2   3 -16   17.70    7.50
   2  -3  16   13.40    7.40
  -2   3 -17   33.20    8.50
   2  -3  17   36.60    8.40
  -2   3 -18   -7.20    8.30
   2  -3  18   -0.80    8.10
  -2   3 -19   46.00    9.60
   2  -3  19   36.40    9.40
  -2   3 -20   17.00    9.40
   2  -3  20   -7.90    9.00
  -2   4  20   19.20   12.00
   2  -4 -20    8.30    8.70
  -2   4  19   -0.40   10.70
   2  -4 -19   -6.30    8.10
  -2   4  18   -8.80   10.50
   2  -4 -18   11.10    7.70
  -2   4  17    1.30    9.70
  -2   4  17    1.10    6.50
   2  -4 -17    3.60    6.90
  -2   4  16  242.68   12.00
  -2   4  16  208.18   16.30
   2  -4 -16  256.07   12.70
  -2   4  15   11.80    8.40
  -2   4  15    0.50    5.60
   2  -4 -15    6.30    4.50
   2  -4 -15   -4.70    5.90
  -2   4  14    2.00    7.70
  -2   4  14   -4.40    4.90
   2  -4 -14   -1.40    2.40
   2  -4 -14   -0.60    5.50
  -2   4  13   -1.90    4.50
  -2   4  13   -3.30    7.00
   2  -4 -13   -1.70    4.80
   2  -4 -13   -1.10    3.80
  -2   4  12  471.45   14.40
  -2   4  12  461.85   19.30
   2  -4 -12  501.75   14.70
   2  -4 -12  466.65   14.10
  -2   4  11   18.10    3.90
  -2   4  11   15.60    6.00
  -2   4  11   14.00    3.60
   2  -4 -11    8.20    4.00
   2  -4 -11   12.30    3.50
  -2   4  10  298.77    9.60
  -2   4  10  287.07    9.70
  -2   4  10  279.87   13.40
   2  -4 -10  279.07   13.30
   2  -4 -10  293.37    9.40
   2  -4 -10  295.17    9.90
  -2   4   9    1.90    3.10
  -2   4   9   -5.60    2.70
  -2   4   9    0.20    4.80
   2  -4  -9   -1.00    2.80
   2  -4  -9    6.70    4.80
   2  -4  -9    1.70    3.20
  -2   4   8 1081.39   35.10
  -2   4   8 1128.99   27.20
  -2   4   8 1092.59   27.30
   2  -4  -8 1135.29   27.20
   2  -4  -8 1081.39   27.30
   2  -4  -8 1150.18   35.40
  -2   4   7    0.70    4.00
  -2   4   7    1.40    2.20
  -2   4   7   -1.20    2.50
   2  -4  -7   -1.00    4.00
   2  -4  -7    1.40    2.50
   2  -4  -7    0.90    2.20
  -2   4   6   56.59    6.20
  -2   4   5   23.10    3.60
   2  -4  -5   21.10    3.90
  -2   4   4  673.63   21.90
   2  -4  -4  723.53   22.20
  -2   4   3   93.79    5.30
  -2   4   2    3.70    3.10
  -2   4   0  504.45   12.50
  -2   4   0  484.75   15.00
  -2   4   0  517.65   12.50
   2  -4   0  497.05   12.50
   2  -4   0  471.45   15.10
   2  -4   0  532.25   12.50
  -2   4  -1    5.00    2.20
  -2   4  -1    6.00    2.10
  -2   4  -1    2.70    3.20
   2  -4   1    6.70    2.10
   2  -4   1   -8.50    3.30
   2  -4   1    7.30    2.10
  -2   4  -2  125.49    5.20
  -2   4  -2  128.89    5.10
   2  -4   2  133.69    5.20
   2  -4   2  124.59    6.20
   2  -4   2  122.09    5.20
  -2   4  -3   11.50    2.60
   2  -4   3   10.70    2.50
   2  -4   3    8.80    2.50
  -2   4  -4   88.89    8.60
  -2   4  -4   88.99    5.40
   2  -4   4   95.89    5.20
   2  -4   4   81.99    5.40
  -2   4  -5    0.50    2.90
  -2   4  -5   -3.90    4.20
  -2   4  -5   -7.40    3.20
  -2   4  -5   -0.60    2.20
   2  -4   5    2.10    2.90
   2  -4   5    2.00    2.50
  -2   4  -6  256.87   10.50
  -2   4  -6  259.17   13.80
  -2   4  -6  244.78    8.60
  -2   4  -6  247.78    8.80
   2  -4   6  200.58    8.10
   2  -4   6  254.27    8.80
  -2   4  -7   34.40    3.70
  -2   4  -7   33.70    5.60
  -2   4  -7   33.10    4.10
  -2   4  -7   36.00    4.80
   2  -4   7   35.40    3.90
   2  -4   7   28.70    3.70
  -2   4  -8  181.58    8.00
  -2   4  -8  179.68    8.30
  -2   4  -8  178.38   12.10
  -2   4  -8  179.48    9.60
   2  -4   8  184.38    8.10
   2  -4   8  186.18    8.40
  -2   4  -9   10.80    4.30
  -2   4  -9    7.80    3.60
  -2   4  -9    7.70    4.60
   2  -4   9   10.30    3.70
   2  -4   9   14.50    4.30
  -2   4 -10  112.09    7.50
  -2   4 -10  103.89    9.10
  -2   4 -10  101.69    8.10
   2  -4  10   94.19    8.00
   2  -4  10  106.89    7.60
  -2   4 -11    4.60    4.70
   2  -4  11    0.40    4.90
  -2   4 -12  337.47   13.10
   2  -4  12  337.57   13.40
  -2   4 -13    0.50    5.80
   2  -4  13   -0.80    5.80
  -2   4 -14    2.20    6.50
   2  -4  14   -4.20    6.30
  -2   4 -15    4.80    6.90
   2  -4  15    1.60    6.80
  -2   4 -16  249.68   14.00
   2  -4  16  263.17   14.50
  -2   4 -17    4.30    7.90
   2  -4  17    0.50    7.80
  -2   4 -18  -10.90    8.10
   2  -4  18   -5.90    8.10
  -2   4 -19   -6.50    8.70
   2  -4  19   -1.40    8.80
  -2   4 -20   79.09   11.10
   2  -4  20   95.99   11.00
  -2   5  20  -10.80   11.50
   2  -5 -20   -3.00    8.60
  -2   5  19    1.70   11.40
   2  -5 -19    5.00    8.30
  -2   5  18    6.70   10.70
   2  -5 -18   -8.10    7.20
  -2   5  17   -0.70    6.50
  -2   5  17  -12.40    9.80
   2  -5 -17   -7.70    6.70
  -2   5  16    6.20    6.00
  -2   5  16    3.80    9.40
   2  -5 -16    2.50    6.40
  -2   5  15  146.49    9.80
  -2   5  15  115.79   13.50
   2  -5 -15  133.89   10.30
  -2   5  14   16.30    8.30
  -2   5  14   22.80    5.40
   2  -5 -14   19.30    5.70
   2  -5 -14   15.40    4.40
  -2   5  13    8.90    7.60
  -2   5  13    7.30    4.70
   2  -5 -13    8.30    4.00
   2  -5 -13   12.40    5.10
  -2   5  12    4.60    6.80
  -2   5  12   -2.20    4.20
   2  -5 -12    0.30    3.60
   2  -5 -12   -0.90    4.40
  -2   5  11  368.76   11.60
  -2   5  11  383.96   11.90
  -2   5  11  359.76   16.10
   2  -5 -11  390.36   12.10
   2  -5 -11  365.16   11.40
  -2   5  10   44.90    6.30
  -2   5  10   44.60    4.10
  -2   5  10   35.00    3.70
   2  -5 -10   41.10    6.20
   2  -5 -10   32.40    4.00
   2  -5 -10   38.10    3.60
  -2   5   9   11.20    2.90
  -2   5   9   10.70    5.10
  -2   5   9   11.40    3.20
   2  -5  -9   13.20    2.90
   2  -5  -9   14.60    3.30
   2  -5  -9   10.10    5.10
  -2   5   8   10.10    2.90
  -2   5   8   13.30    4.50
  -2   5   8   12.00    2.70
   2  -5  -8   15.70    4.90
   2  -5  -8   10.90    3.00
   2  -5  -8   12.10    2.60
  -2   5   7  920.21   30.40
   2  -5  -7  994.20   30.70
  -2   5   6   17.70    4.00
   2  -5  -6    1.70    3.70
  -2   5   5   12.60    3.30
   2  -5  -5    7.80    3.40
  -2   5   4    0.80    2.70
  -2   5   3  925.41   28.30
  -2   5   2  133.49    7.00
  -2   5   1  137.29    7.00
   2  -5  -1  137.89    6.80
  -2   5   0   13.10    2.00
  -2   5   0   12.60    2.00
  -2   5   0   15.80    3.60
   2  -5   0   12.00    2.10
   2  -5   0   14.10    2.10
   2  -5   0   13.40    3.30
  -2   5  -1  191.18    7.80
  -2   5  -1  182.08    6.10
  -2   5  -1  191.38    6.10
   2  -5   1  181.08    6.10
   2  -5   1  187.58    6.20
   2  -5   1  193.48    7.70
  -2   5  -2   22.50    2.70
   2  -5   2   21.40    2.70
   2  -5   2   23.20    3.50
   2  -5   2   18.80    2.60
  -2   5  -3  187.68    6.80
  -2   5  -3  167.68    6.20
   2  -5   3  188.28    6.80
   2  -5   3  188.58    6.70
  -2   5  -4   18.80    3.10
   2  -5   4   18.70    3.00
   2  -5   4   18.90    2.80
  -2   5  -5    3.70    5.00
  -2   5  -5    3.90    3.50
  -2   5  -5    3.40    3.20
  -2   5  -5    9.10    2.60
   2  -5   5    8.90    3.00
   2  -5   5    6.10    2.60
  -2   5  -6  118.49    6.10
  -2   5  -6  107.09    7.30
  -2   5  -6  108.89    6.70
  -2   5  -6  112.29   10.20
   2  -5   6  104.99    5.90
   2  -5   6  100.69    6.50
  -2   5  -7  147.09    7.80
  -2   5  -7  147.79   11.50
  -2   5  -7  153.18    7.30
  -2   5  -7  151.68    8.70
   2  -5   7  154.08    7.20
   2  -5   7  146.29    7.60
  -2   5  -8    0.00    3.80
  -2   5  -8    1.50    5.40
  -2   5  -8   -2.80    4.10
  -2   5  -8   -1.80    3.20
   2  -5   8    3.10    3.90
   2  -5   8    2.10    3.30
  -2   5  -9    0.40    4.50
  -2   5  -9    6.40    5.60
  -2   5  -9   -2.20    4.20
  -2   5  -9    3.50    3.50
   2  -5   9    1.90    4.20
   2  -5   9    7.40    3.60
  -2   5 -10   15.30    4.10
  -2   5 -10   17.60    4.90
  -2   5 -10   18.50    5.50
  -2   5 -10   17.00    6.10
   2  -5  10   16.40    4.00
   2  -5  10   21.40    5.00
  -2   5 -11  110.69    8.90
   2  -5  11  122.09    9.00
  -2   5 -12   -0.10    5.30
   2  -5  12    0.10    5.60
  -2   5 -13   39.80    6.70
   2  -5  13   44.50    6.80
  -2   5 -14   56.29    7.60
   2  -5  14   51.39    7.50
  -2   5 -15  176.58   12.20
   2  -5  15  145.19   12.20
  -2   5 -16   11.00    7.50
   2  -5  16    9.20    7.60
  -2   5 -17   39.20    8.50
   2  -5  17   43.60    9.00
  -2   5 -18   -1.90    8.40
   2  -5  18    4.80    8.60
  -2   5 -19   18.50    9.40
   2  -5  19   24.10    9.50
  -2   6  20   -2.50   12.20
   2  -6 -20    0.90    8.70
  -2   6  19   -2.60   11.40
   2  -6 -19   -2.30    8.00
  -2   6  18    8.40   10.70
   2  -6 -18    4.20    7.50
  -2   6  17   37.40   11.20
   2  -6 -17   21.30    7.40
  -2   6  16   29.10    6.40
  -2   6  16   32.40   10.20
   2  -6 -16   40.90    7.10
  -2   6  15    7.00    8.70
  -2   6  15    0.30    5.50
   2  -6 -15   -2.00    5.90
  -2   6  14  111.39   11.10
  -2   6  14  113.69    8.90
   2  -6 -14  106.79    7.80
   2  -6 -14  135.09    9.40
  -2   6  13    3.20    4.70
  -2   6  13    2.10    7.90
   2  -6 -13   -2.10    5.00
   2  -6 -13   -1.90    3.90
  -2   6  12    9.50    7.00
  -2   6  12    4.20    4.20
   2  -6 -12   15.40    3.80
   2  -6 -12    4.80    4.50
  -2   6  11    4.30    3.30
  -2   6  11    9.70    3.90
  -2   6  11    4.40    6.10
   2  -6 -11    1.80    3.20
   2  -6 -11   11.10    4.20
  -2   6  10  165.08    7.10
  -2   6  10  163.28   10.70
  -2   6  10  167.78    7.50
   2  -6 -10  165.68    7.50
   2  -6 -10  177.38   11.00
   2  -6 -10  152.08    6.80
  -2   6   9    1.50    3.00
  -2   6   9    3.90    2.80
  -2   6   9    2.90    5.10
   2  -6  -9    1.20    2.60
   2  -6  -9   -7.50    5.00
  -2   6   8  661.33   23.00
   2  -6  -8  704.23   23.50
  -2   6   7   36.80    4.90
   2  -6  -7    8.60    5.00
  -2   6   6 1034.30   33.10
   2  -6  -6 1092.79   33.40
  -2   6   5   67.99    5.80
  -2   6   4  102.99    6.10
  -2   6   3    1.50    2.90
  -2   6   3    0.90    4.00
  -2   6   2   45.70    4.50
  -2   6   1   19.10    4.10
   2  -6  -1    0.90    2.60
  -2   6   0   95.59    4.40
  -2   6   0   97.89    4.30
  -2   6   0  105.69    6.50
   2  -6   0   97.79    4.40
   2  -6   0   98.09    4.50
  -2   6  -1   -1.20    2.10
  -2   6  -1   -1.90    2.20
  -2   6  -1    2.60    3.90
   2  -6   1   -0.50    2.60
   2  -6   1   -1.70    2.30
   2  -6   1   -0.20    2.30
  -2   6  -2   27.90    3.10
  -2   6  -2   25.60    2.80
   2  -6   2   31.50    3.00
   2  -6   2   25.10    3.00
  -2   6  -3   11.50    2.60
  -2   6  -3    9.90    2.90
   2  -6   3   13.50    2.90
   2  -6   3   18.10    3.00
   2  -6   3   18.10    3.70
  -2   6  -4  143.39    6.70
   2  -6   4  152.98    6.40
   2  -6   4  136.59    6.60
  -2   6  -5    8.00    3.30
  -2   6  -5   11.20    3.70
   2  -6   5    0.70    2.30
   2  -6   5   12.00    3.40
  -2   6  -6   27.50    3.90
  -2   6  -6   22.60    3.40
  -2   6  -6   29.00    4.30
  -2   6  -6   21.70    6.30
   2  -6   6   27.10    3.80
   2  -6   6   25.60    3.80
  -2   6  -7   -4.00    4.00
  -2   6  -7    1.80    3.70
  -2   6  -7   -1.10    3.10
  -2   6  -7   -1.10    5.70
   2  -6   7    1.30    3.40
   2  -6   7   -0.90    3.70
  -2   6  -8   82.49    7.50
  -2   6  -8   85.69   10.70
  -2   6  -8   95.49    7.30
  -2   6  -8   75.69    6.60
   2  -6   8   88.59    7.10
   2  -6   8   81.29    7.60
  -2   6  -9   -3.10    3.60
  -2   6  -9   -0.50    4.50
  -2   6  -9   -2.00    6.00
  -2   6  -9    2.60    4.60
   2  -6   9   -3.40    4.30
   2  -6   9   -0.10    3.90
  -2   6 -10   45.90    6.30
  -2   6 -10   54.59    5.80
  -2   6 -10   40.80    7.40
   2  -6  10   38.90    5.10
   2  -6  10   49.70    5.70
  -2   6 -11    7.30    6.80
  -2   6 -11    3.80    5.30
   2  -6  11    4.00    5.30
  -2   6 -12   20.00    6.00
   2  -6  12   12.90    6.10
  -2   6 -13    9.60    6.30
   2  -6  13    4.80    6.50
  -2   6 -14    8.80    6.50
   2  -6  14   -3.50    6.60
  -2   6 -15    2.00    7.00
   2  -6  15    4.80    7.10
  -2   6 -16   -6.00    7.60
   2  -6  16    5.00    7.70
  -2   6 -17    2.80    8.10
   2  -6  17   -2.50    8.20
  -2   6 -18   -7.80    8.40
   2  -6  18  -14.60    8.70
  -2   6 -19   -5.40    9.20
   2  -6  19   -5.10    9.00
  -2   7  19    4.60   11.80
   2  -7 -19   -0.60    8.50
  -2   7  18    1.60   10.90
   2  -7 -18    0.90    7.90
  -2   7  17  138.69   16.10
   2  -7 -17  173.48   12.30
  -2   7  16    8.60   10.00
   2  -7 -16   14.00    6.90
  -2   7  15    5.20    9.20
  -2   7  15    3.30    5.40
   2  -7 -15   -1.60    6.20
  -2   7  14    6.10    5.10
  -2   7  14    6.30    8.40
   2  -7 -14    7.50    4.20
   2  -7 -14    6.30    5.80
  -2   7  13  171.98   13.90
  -2   7  13  192.18    9.30
   2  -7 -13  222.88   10.20
   2  -7 -13  168.08    8.40
  -2   7  12    5.30    4.30
  -2   7  12    3.90    7.20
   2  -7 -12    3.10    4.70
   2  -7 -12    0.00    3.60
  -2   7  11   18.70    6.60
  -2   7  11    7.90    4.00
  -2   7  11   12.30    3.60
   2  -7 -11   10.60    4.10
   2  -7 -11   10.10    3.40
  -2   7  10   22.70    3.30
  -2   7  10   41.80    6.50
  -2   7  10   26.20    3.80
   2  -7 -10   21.80    3.30
   2  -7 -10   21.10    3.90
   2  -7 -10    6.50    6.10
  -2   7   9  542.55   19.80
   2  -7  -9  550.64   20.30
  -2   7   8   63.69    7.30
   2  -7  -8   47.30    5.90
  -2   7   7    8.20    4.40
   2  -7  -7    8.00    4.40
  -2   7   6   10.70    4.20
  -2   7   5  395.76   14.10
  -2   7   4   -2.00    3.20
  -2   7   4   -3.20    4.40
  -2   7   3   26.60    4.80
  -2   7   3   28.40    3.70
  -2   7   2    6.50    2.90
  -2   7   2    4.50    4.20
  -2   7   1  733.93   21.80
  -2   7   1  728.33   18.00
   2  -7  -1  748.03   21.80
   2  -7  -1  709.33   18.00
  -2   7   0   57.39    4.20
  -2   7   0   49.70    5.20
  -2   7   0   61.39    4.10
   2  -7   0   43.50    5.00
   2  -7   0   55.79    4.30
   2  -7   0   54.29    4.30
  -2   7  -1  100.69    5.10
  -2   7  -1  106.29    7.70
  -2   7  -1  109.19    5.20
   2  -7   1  104.49    5.10
   2  -7   1  104.19    5.20
   2  -7   1   92.99    7.10
  -2   7  -2    0.50    2.70
  -2   7  -2    1.70    2.60
   2  -7   2    2.80    2.70
   2  -7   2    0.50    3.80
   2  -7   2   -2.40    2.70
  -2   7  -3  568.14   15.20
  -2   7  -3  557.04   15.10
   2  -7   3  566.54   15.10
   2  -7   3  566.74   15.20
   2  -7   3  553.04   17.60
  -2   7  -4   36.50    3.90
  -2   7  -4   35.70    3.50
   2  -7   4   30.10    3.50
   2  -7   4   35.80    3.80
   2  -7   4   20.90    4.50
  -2   7  -5   14.40    2.10
   2  -7   5   34.40    4.00
  -2   7  -6   14.90    3.90
  -2   7  -6    5.30    3.90
   2  -7   6   11.60    3.70
   2  -7   6   18.90    3.70
  -2   7  -7  214.68   10.20
  -2   7  -7  219.58   15.00
  -2   7  -7  212.98    9.40
   2  -7   7  214.98    9.20
   2  -7   7  220.88    9.20
  -2   7  -8    1.10    6.30
  -2   7  -8   -2.80    4.10
  -2   7  -8    0.90    4.20
   2  -7   8   -4.70    4.30
   2  -7   8   -1.80    3.80
  -2   7  -9   56.29    8.30
  -2   7  -9   62.69    5.90
  -2   7  -9   71.09    8.00
   2  -7   9   55.79    5.30
   2  -7   9   54.29    5.90
  -2   7 -10    5.30    5.10
  -2   7 -10   -5.10    7.00
  -2   7 -10   -3.50    5.20
   2  -7  10    9.60    5.00
  -2   7 -11  133.19   13.50
  -2   7 -11  133.99    9.90
   2  -7  11  135.99    9.90
  -2   7 -12   10.90    6.10
   2  -7  12    5.90    6.20
  -2   7 -13   10.30    6.50
   2  -7  13    2.70    6.60
  -2   7 -14    1.00    6.60
   2  -7  14   -2.20    6.80
  -2   7 -15   54.49    8.30
   2  -7  15   50.19    8.40
  -2   7 -16   25.50    8.10
   2  -7  16    9.00    8.10
  -2   7 -17   -2.20    8.20
   2  -7  17    0.00    8.40
  -2   7 -18   -2.10    8.80
   2  -7  18  -12.80    8.70
  -2   7 -19   13.50    9.30
   2  -7  19    4.60    9.70
  -2   8  19    5.70   11.70
   2  -8 -19   10.80    8.40
  -2   8  18    5.70   11.50
   2  -8 -18    4.50    7.70
  -2   8  17    3.20   10.60
   2  -8 -17    1.10    7.20
  -2   8  16  294.67   19.10
   2  -8 -16  374.26   14.50
  -2   8  15   22.20    9.60
   2  -8 -15   17.50    6.50
  -2   8  14   -0.80    5.10
  -2   8  14   -5.20    8.40
   2  -8 -14   -6.90    5.70
  -2   8  13    5.20    8.00
  -2   8  13    7.30    4.80
   2  -8 -13    9.30    5.50
   2  -8 -13    9.40    4.10
  -2   8  12  537.15   15.40
  -2   8  12  516.75   21.00
  -2   8  12  499.25   25.40
   2  -8 -12  548.05   15.60
   2  -8 -12  479.35   14.70
  -2   8  11   30.80    7.20
  -2   8  11   24.30    5.90
  -2   8  10  163.38   10.60
   2  -8 -10  134.89   11.00
  -2   8   9   14.30    5.40
   2  -8  -9    5.80    5.30
   2  -8  -8   57.79    6.40
  -2   8   7   24.40    4.80
  -2   8   6  114.49    7.50
  -2   8   5   -3.50    3.80
  -2   8   5    0.60    5.00
  -2   8   4  365.46   13.20
  -2   8   4  367.26   13.70
  -2   8   3  197.58    8.60
  -2   8   3  207.88   10.10
  -2   8   2  774.42   24.40
  -2   8   2  793.42   23.70
  -2   8   1   29.70    5.10
   2  -8  -1   10.60    4.80
  -2   8   0  682.33   21.00
  -2   8   0  671.53   17.30
  -2   8   0  676.73   17.30
   2  -8   0  661.63   20.90
   2  -8   0  692.13   17.30
   2  -8   0  689.93   17.30
  -2   8  -1   89.89    5.10
  -2   8  -1   88.69    5.30
  -2   8  -1   86.29    7.90
   2  -8   1   61.89    5.90
   2  -8   1   90.69    5.30
   2  -8   1   92.59    5.40
  -2   8  -2  222.48    8.10
  -2   8  -2  233.48    8.00
   2  -8   2  226.58   10.30
   2  -8   2  240.58    8.10
   2  -8   2  218.58    8.10
  -2   8  -3   30.40    3.40
  -2   8  -3   29.60    3.90
   2  -8   3   28.10    3.70
   2  -8   3   29.50    3.50
   2  -8   3   25.00    4.80
  -2   8  -4  320.87   10.30
  -2   8  -4  315.97   10.60
   2  -8   4  329.77   10.40
   2  -8   4  321.97   12.30
   2  -8   4  326.97   10.60
  -2   8  -5   30.30    3.60
  -2   8  -5   41.00    4.40
  -2   8  -5   35.70    4.40
   2  -8   5   30.60    4.20
   2  -8   5   28.10    4.90
  -2   8  -6   43.00    4.80
  -2   8  -6   36.60    4.70
   2  -8   6   32.60    4.50
   2  -8   6   41.90    4.40
  -2   8  -7   11.40    4.50
  -2   8  -7    3.90    4.30
  -2   8  -7    4.60    6.90
   2  -8   7    8.50    4.00
   2  -8   7    7.10    4.20
  -2   8  -8  453.95   14.70
  -2   8  -8  436.86   16.60
  -2   8  -8  432.36   23.40
   2  -8   8  460.55   14.60
   2  -8   8  445.06   14.60
  -2   8  -9   28.90    5.50
  -2   8  -9   25.70    7.80
  -2   8  -9   15.70    5.30
   2  -8   9   19.40    5.30
   2  -8   9   19.20    4.90
  -2   8 -10    6.50    7.60
  -2   8 -10   13.30    5.70
  -2   8 -10    9.60    5.40
   2  -8  10   11.10    5.60
  -2   8 -11    2.80    5.80
  -2   8 -11   -1.30    7.70
   2  -8  11   -8.30    5.70
  -2   8 -12  311.17   13.90
  -2   8 -12  330.87   20.00
   2  -8  12  315.97   14.00
  -2   8 -13   29.60    6.90
  -2   8 -13   22.70    9.10
   2  -8  13   22.10    7.10
  -2   8 -14   16.60    7.40
   2  -8  14   17.00    7.50
  -2   8 -15   17.90    7.60
   2  -8  15    5.70    7.70
  -2   8 -16   85.59    9.70
   2  -8  16   93.59   10.10
  -2   8 -17    8.30    8.50
   2  -8  17  -11.90    8.40
  -2   8 -18   -7.60    8.90
   2  -8  18   10.30    9.30
   2  -9 -19   19.80    9.10
  -2   9  18    7.70   11.50
   2  -9 -18    1.70    7.80
  -2   9  17    5.80   10.80
   2  -9 -17    0.70    7.50
  -2   9  16    1.00   10.10
   2  -9 -16    2.80    6.90
  -2   9  15   29.30   10.00
   2  -9 -15   22.00    7.00
  -2   9  14   14.00    8.70
  -2   9  13   79.69   12.10
  -2   9  13   87.29   10.00
  -2   9  13   84.89    7.90
  -2   9  12   44.70    8.40
  -2   9  12   33.90    7.50
  -2   9  11   21.80    7.20
  -2   9  11   18.70    5.90
  -2   9  10   14.90    6.30
  -2   9   9    7.20    5.50
   2  -9  -9    0.30    5.30
  -2   9   8    5.70    4.90
  -2   9   7   -4.50    4.40
  -2   9   6    5.60    5.50
  -2   9   6   -7.90    4.20
  -2   9   5   80.39    6.90
  -2   9   5   95.79    8.80
  -2   9   4   10.60    4.00
  -2   9   4   19.90    5.30
  -2   9   3   10.20    5.20
  -2   9   3    3.80    3.50
  -2   9   2   20.00    5.50
  -2   9   1  487.75   16.50
  -2   9   1  475.75   12.80
  -2   9   1  461.85   12.80
   2  -9  -1  492.15   16.50
   2  -9  -1  468.65   12.80
  -2   9   0   42.90    3.50
  -2   9   0   34.70    3.20
  -2   9   0   51.69    6.00
   2  -9   0   41.20    3.50
   2  -9   0   43.90    3.60
   2  -9   0   36.80    5.40
  -2   9  -1   65.79    6.40
  -2   9  -1   49.40    4.00
  -2   9  -1   58.29    5.00
   2  -9   1   51.19    4.00
   2  -9   1   51.59    5.90
   2  -9   1   55.39    5.30
  -2   9  -2   25.20    3.20
  -2   9  -2   29.40    3.70
   2  -9   2   26.20    3.60
   2  -9   2   28.90    3.70
   2  -9   2   25.30    5.00
  -2   9  -3  175.68    7.70
  -2   9  -3  171.68    7.50
   2  -9   3  181.68    9.50
   2  -9   3  170.18    7.70
   2  -9   3  157.28    7.30
  -2   9  -4    3.10    3.80
  -2   9  -4    1.50    3.30
   2  -9   4    2.30    3.80
   2  -9   4    1.60    4.30
   2  -9   4   -0.10    2.90
  -2   9  -5   10.70    3.80
  -2   9  -5   10.30    3.50
  -2   9  -5    9.70    4.10
   2  -9   5    7.20    4.10
   2  -9   5   11.90    4.80
   2  -9   5   10.10    3.60
  -2   9  -6    0.80    3.90
  -2   9  -6    0.40    4.30
   2  -9   6    8.20    4.00
   2  -9   6    2.20    4.20
   2  -9   6    6.00    4.50
  -2   9  -7   18.90    4.80
  -2   9  -7   24.60    4.70
   2  -9   7   20.00    4.90
   2  -9   7   20.70    4.50
  -2   9  -8    2.70    4.60
  -2   9  -8   -8.30    7.60
  -2   9  -8    3.10    5.10
   2  -9   8   -3.20    4.20
   2  -9   8    0.90    4.80
  -2   9  -9    2.80    5.10
  -2   9  -9    1.80    7.90
  -2   9  -9   -1.30    5.40
   2  -9   9   -5.70    4.50
   2  -9   9    3.20    5.50
  -2   9 -10   -5.10    5.40
  -2   9 -10    4.00    8.30
  -2   9 -10   11.00    5.90
   2  -9  10    4.70    5.90
  -2   9 -11    0.10    6.00
  -2   9 -11    0.60    8.40
   2  -9  11   -1.70    6.10
  -2   9 -12   21.20    8.90
  -2   9 -12   13.90    6.90
   2  -9  12    9.20    6.60
  -2   9 -13   44.70    7.70
  -2   9 -13   45.80   10.30
   2  -9  13   38.80    7.80
  -2   9 -14    5.70    7.30
  -2   9 -14    1.80    9.30
   2  -9  14   -0.80    7.30
  -2   9 -15   19.80    7.80
   2  -9  15   24.80    8.30
  -2   9 -16   -7.50    8.00
   2  -9  16   -4.10    8.30
  -2   9 -17  -11.10    8.10
   2  -9  17   -2.30    8.60
  -2   9 -18    0.70    9.20
   2  -9  18   -9.80    9.20
  -2  10  18   18.00   11.90
  -2  10  17    8.60   10.90
   2 -10 -17   -3.70    7.30
  -2  10  16    9.20   10.30
   2 -10 -16   -2.10    6.80
  -2  10  15   10.50   10.00
  -2  10  14    9.70    9.10
  -2  10  13   13.60    8.20
  -2  10  12   14.90    6.60
  -2  10  12   11.00    7.80
  -2  10  11   10.10    7.10
  -2  10  10  105.99   10.30
  -2  10   9    4.70    5.70
  -2  10   8  131.59    9.50
  -2  10   7   -2.80    6.20
  -2  10   7   -7.20    4.70
  -2  10   6   -7.30    5.90
  -2  10   6  -11.30    4.30
  -2  10   5   13.40    5.90
  -2  10   5    0.40    4.30
  -2  10   4   -6.10    3.90
  -2  10   4   -2.20    5.50
  -2  10   3   24.60    6.00
  -2  10   2   10.20    5.60
  -2  10   1    5.00    5.50
  -2  10   1    9.70    3.10
  -2  10   1    9.90    2.80
   2 -10  -1    5.10    3.00
   2 -10  -1   11.30    4.90
  -2  10   0   19.00    5.90
  -2  10   0   15.00    3.40
  -2  10   0    6.90    3.00
   2 -10   0   17.50    5.20
   2 -10   0   12.80    3.50
   2 -10   0   10.80    3.20
  -2  10  -1   17.20    3.30
  -2  10  -1   25.30    6.00
  -2  10  -1   15.70    3.70
   2 -10   1   16.20    3.60
   2 -10   1   20.80    5.30
   2 -10   1   21.40    3.80
  -2  10  -2   -0.40    3.00
  -2  10  -2   -5.00    3.40
   2 -10   2   -1.50    4.80
   2 -10   2   -6.20    3.30
   2 -10   2   -4.80    3.60
  -2  10  -3    7.60    3.20
  -2  10  -3    3.70    3.80
   2 -10   3    5.00    3.90
   2 -10   3    4.80    3.40
   2 -10   3    0.60    5.10
  -2  10  -4   20.80    4.40
   2 -10   4   13.00    5.10
   2 -10   4   12.50    4.10
   2 -10   4    2.20    2.40
  -2  10  -5    6.20    3.80
  -2  10  -5    3.20    4.40
   2 -10   5   11.10    4.10
   2 -10   5    2.30    4.20
  -2  10  -6   -2.40    3.90
  -2  10  -6   -1.30    4.50
   2 -10   6   -6.40    4.40
   2 -10   6   -0.10    3.90
  -2  10  -7   -1.40    4.30
  -2  10  -7   -6.80    4.80
   2 -10   7   -1.30    4.80
   2 -10   7    2.10    4.40
  -2  10  -8   67.99    8.20
  -2  10  -8   62.69    6.40
  -2  10  -8   72.29   10.50
   2 -10   8   90.89    8.20
   2 -10   8   70.89    6.40
  -2  10  -9   12.40    5.90
  -2  10  -9   10.90    5.50
  -2  10  -9   11.90    9.00
   2 -10   9    3.60    5.20
   2 -10   9   11.30    5.80
  -2  10 -10   18.20    9.40
  -2  10 -10   11.10    5.90
  -2  10 -10    8.20    6.10
   2 -10  10   14.10    6.20
  -2  10 -11    4.00    9.00
  -2  10 -11    9.30    6.50
   2 -10  11   -1.80    6.40
  -2  10 -12   -3.70    9.00
  -2  10 -12   -1.00    6.70
   2 -10  12   -7.00    6.70
  -2  10 -13   13.00    7.40
  -2  10 -13  -12.80    9.70
   2 -10  13    6.30    7.30
  -2  10 -14   -1.40    7.30
  -2  10 -14   -1.90   10.20
   2 -10  14    4.90    7.70
  -2  10 -15   -2.10    7.80
   2 -10  15   -1.60    8.20
  -2  10 -16    6.10    8.20
   2 -10  16    2.30    8.30
  -2  10 -17  -11.80    8.50
   2 -10  17   -2.20    9.20
  -2  11  17   50.79   12.10
  -2  11  16    8.20   10.50
  -2  11  15   27.60   10.20
  -2  11  14   56.89   10.20
  -2  11  13  242.48   15.40
  -2  11  12   15.90    7.90
  -2  11  11    9.10    7.30
  -2  11  10   28.30    7.30
  -2  11   9   73.49    8.80
  -2  11   9   75.89    7.80
  -2  11   8   -7.20    5.40
  -2  11   8   -3.70    6.90
  -2  11   7   86.59    8.30
  -2  11   7  106.39   10.70
  -2  11   6   99.79    8.20
  -2  11   6  114.29   10.70
  -2  11   5  216.08   10.30
  -2  11   5  241.48   12.70
  -2  11   4    5.80    6.40
  -2  11   3   71.09    7.70
  -2  11   2  274.27   12.40
  -2  11   2  207.28    8.00
  -2  11   1  698.83   17.90
  -2  11   1  655.63   17.80
  -2  11   1  690.03   22.40
   2 -11  -1  664.63   17.90
  -2  11   0   15.60    3.20
  -2  11   0   33.20    6.70
  -2  11   0   24.80    3.90
   2 -11   0   25.50    3.70
   2 -11   0   27.10    4.00
  -2  11  -1  123.29    6.60
  -2  11  -1  118.89   10.10
  -2  11  -1  127.49    7.00
   2 -11   1  117.79    6.80
   2 -11   1  132.49    7.00
  -2  11  -2  113.89    7.10
  -2  11  -2  106.19    6.60
   2 -11   2  128.79    7.30
   2 -11   2  115.69    6.90
  -2  11  -3  254.67    9.80
   2 -11   3  247.88    9.70
   2 -11   3  234.88    9.30
  -2  11  -4    4.20    4.50
   2 -11   4    2.40    2.80
   2 -11   4    0.90    4.40
  -2  11  -5   97.29    8.00
   2 -11   5  104.99    7.50
   2 -11   5   92.19    8.00
  -2  11  -6   72.49    7.50
  -2  11  -6   98.09    8.40
   2 -11   6   99.49    7.80
   2 -11   6   95.49    8.30
  -2  11  -7  276.77   11.80
  -2  11  -7  258.67   12.00
   2 -11   7  299.17   11.60
   2 -11   7  277.97   11.90
  -2  11  -8    5.20    5.70
  -2  11  -8    3.80    5.00
   2 -11   8    4.40    4.90
   2 -11   8    1.60    5.50
  -2  11  -9   28.80    6.60
  -2  11  -9   34.50   10.40
  -2  11  -9   38.00    6.10
   2 -11   9   30.40    6.50
  -2  11 -10   43.60   10.80
  -2  11 -10   40.70    6.60
  -2  11 -10   41.30    7.10
   2 -11  10   44.30    7.10
  -2  11 -11   63.99   11.70
  -2  11 -11   71.19    8.20
   2 -11  11   62.39    8.10
  -2  11 -12   -0.90    6.90
  -2  11 -12    2.10    9.90
   2 -11  12   -7.10    6.80
  -2  11 -13   55.09   12.00
  -2  11 -13   56.19    8.50
   2 -11  13   50.89    8.60
  -2  11 -14   16.10    8.10
  -2  11 -14   12.10   10.60
   2 -11  14   16.90    8.10
  -2  11 -15   47.00   12.50
  -2  11 -15   34.90    8.60
   2 -11  15   31.80    9.00
  -2  11 -16    0.70    8.60
   2 -11  16   -4.60    8.50
  -2  11 -17    1.50    8.70
   2 -11  17   11.80    9.40
  -2  12  17   14.60   11.40
  -2  12  16   89.19   12.50
  -2  12  15   19.60   10.30
  -2  12  14   22.30    9.80
  -2  12  13   16.50    8.60
  -2  12  12  321.67   16.60
  -2  12  11   39.90    8.10
  -2  12  10   53.99    9.60
  -2  12  10   65.09    8.20
  -2  12   9   -0.80    7.70
  -2  12   9    3.50    6.30
  -2  12   8  109.79    9.50
  -2  12   8  119.59   11.90
  -2  12   7    9.40    7.60
  -2  12   7   -0.10    5.60
  -2  12   6   22.90    5.60
  -2  12   6   37.20    7.90
  -2  12   5   -7.60    4.70
  -2  12   5    5.70    7.20
  -2  12   4  416.66   17.10
  -2  12   3   68.99    8.20
  -2  12   2   81.39    5.90
  -2  12   2   76.49    5.90
  -2  12   2   77.49    8.50
   2 -12  -2   75.59    6.00
  -2  12   1    1.30    3.30
  -2  12   1    0.30    3.60
  -2  12   1   -1.10    6.70
   2 -12  -1   -1.80    3.80
   2 -12  -1   -1.60    3.70
  -2  12   0  219.28    8.80
  -2  12   0  219.28   12.50
  -2  12   0  208.48    8.50
   2 -12   0  209.18    8.40
   2 -12   0  217.18    8.80
  -2  12  -1   55.79    4.90
  -2  12  -1   51.59    7.60
   2 -12   1   46.50    4.90
   2 -12   1   46.00    4.60
  -2  12  -2   22.90    4.50
   2 -12   2   26.50    4.70
   2 -12   2   13.50    4.10
  -2  12  -3   16.60    4.70
   2 -12   3    3.30    3.50
   2 -12   3    6.70    4.60
  -2  12  -4  224.28   10.00
   2 -12   4  230.38   10.00
   2 -12   4  181.88    8.90
  -2  12  -5   66.39    6.20
   2 -12   5   55.69    6.00
   2 -12   5   59.99    5.60
  -2  12  -6   67.39    6.60
   2 -12   6   64.09    6.00
   2 -12   6   68.29    6.70
  -2  12  -7   -5.40    5.60
  -2  12  -7    3.20    4.70
   2 -12   7   -6.00    5.70
   2 -12   7   -1.90    4.80
  -2  12  -8   70.99    7.30
  -2  12  -8   80.49    8.50
   2 -12   8   94.39    9.10
   2 -12   8   78.09    7.50
  -2  12  -9    6.60    6.50
  -2  12  -9   12.40   10.20
  -2  12  -9   10.50    5.60
   2 -12   9    6.60    6.30
  -2  12 -10   27.30   11.20
  -2  12 -10   25.00    7.00
  -2  12 -10   31.60    6.50
   2 -12  10   14.90    6.90
  -2  12 -11   -4.20   10.50
  -2  12 -11   -5.40    7.10
   2 -12  11   -0.80    7.10
  -2  12 -12  150.68   12.20
  -2  12 -12  132.19   18.50
   2 -12  12  125.99   12.10
  -2  12 -13   27.40   11.50
  -2  12 -13   24.10    8.10
   2 -12  13   10.50    7.90
  -2  12 -14   12.50    8.40
  -2  12 -14    6.80   11.30
   2 -12  14   -5.30    7.90
  -2  12 -15    5.30    8.30
   2 -12  15  -15.40    8.30
  -2  12 -16   33.90    9.60
   2 -12  16   45.80    9.80
  -2  13  16    5.60   10.70
  -2  13  15   43.80   11.10
  -2  13  14   17.80    9.80
  -2  13  13   41.10   10.80
  -2  13  13   38.10    9.50
  -2  13  12   16.70    8.10
  -2  13  12    0.70    9.50
  -2  13  11  145.29   14.10
  -2  13  11  164.28   12.50
  -2  13  10   35.50    8.00
  -2  13  10   28.70    9.40
  -2  13   9   41.30    7.70
  -2  13   9   48.10    9.60
  -2  13   8    7.30    8.40
  -2  13   8   -6.10    6.00
  -2  13   7    6.40    5.80
  -2  13   7    5.30    8.10
  -2  13   6   18.90    5.80
  -2  13   6   19.00    8.20
  -2  13   5   36.40    8.50
  -2  13   4   -7.10    7.50
  -2  13   3   61.69    8.70
  -2  13   2   -4.00    7.30
  -2  13   2    2.10    3.80
  -2  13   1    3.80    7.50
  -2  13   1    3.20    3.90
   2 -13  -1   -3.50    4.20
   2 -13  -1    2.70    3.90
  -2  13   0   -2.40    4.20
  -2  13   0  -12.60    7.10
   2 -13   0   -2.20    3.90
   2 -13   0   -1.90    4.40
  -2  13  -1   -5.80    4.20
  -2  13  -1   -2.70    7.10
   2 -13   1   -4.60    4.50
   2 -13   1   -3.60    4.00
  -2  13  -2   -6.20    4.60
   2 -13   2   -2.80    4.70
   2 -13   2   -3.10    4.00
  -2  13  -3    4.60    5.00
   2 -13   3    0.00    2.70
   2 -13   3   15.50    5.30
  -2  13  -4   -5.00    5.20
   2 -13   4    0.30    5.20
   2 -13   4   -1.10    4.70
  -2  13  -5   -2.40    5.40
   2 -13   5   -2.60    4.80
   2 -13   5   -3.60    5.50
  -2  13  -6   -0.70    5.70
   2 -13   6    3.50    5.90
   2 -13   6   11.40    5.20
  -2  13  -7    2.50    6.10
   2 -13   7    5.80    5.40
   2 -13   7    2.30    6.10
  -2  13  -8  -19.90    6.00
   2 -13   8    4.60    6.00
   2 -13   8   -1.50    6.40
  -2  13  -9   11.90   11.10
  -2  13  -9   13.60    7.00
  -2  13  -9    8.80    5.70
   2 -13   9   11.70    6.80
  -2  13 -10   -7.50    7.00
  -2  13 -10   -4.10   11.20
   2 -13  10   -4.50    6.90
  -2  13 -11   25.30    7.80
  -2  13 -11   34.70   12.50
   2 -13  11   31.90    8.10
  -2  13 -12  -11.10    7.30
  -2  13 -12    3.50   11.60
   2 -13  12  -13.60    7.40
  -2  13 -13  -12.50   11.40
  -2  13 -13   -6.40    7.90
   2 -13  13   -5.00    7.70
  -2  13 -14  -17.40    8.00
  -2  13 -14   -8.50   11.90
   2 -13  14   -4.20    8.30
  -2  13 -15   24.60    9.00
   2 -13  15   30.40    9.30
  -2  14  15    2.90   10.40
  -2  14  14   -5.10   10.90
  -2  14  14   13.30   10.00
  -2  14  13   -5.40   10.10
  -2  14  13   19.20    9.00
  -2  14  12    1.30    9.80
  -2  14  12   13.20    8.30
  -2  14  11   -1.00    7.60
  -2  14  11    0.90    9.60
  -2  14  10   33.10   10.50
  -2  14  10   27.80    7.70
  -2  14   9  -16.40    9.00
  -2  14   9   -0.70    6.70
  -2  14   8  -16.90    6.00
  -2  14   8   -9.60    8.70
  -2  14   7   -4.60    8.40
  -2  14   6   -8.30    8.40
  -2  14   5    0.50    8.50
  -2  14   4    4.40    8.40
  -2  14   3    1.80    8.30
  -2  14   2   30.90    4.60
  -2  14   2   31.90    8.80
   2 -14  -2   39.30    4.90
  -2  14   1   11.50    8.40
  -2  14   1    0.40    4.50
   2 -14  -1    4.90    4.80
   2 -14  -1   -2.00    4.20
  -2  14   0   48.30    9.20
  -2  14   0   36.90    5.30
   2 -14   0   36.60    5.10
   2 -14   0   43.90    5.50
  -2  14  -1   -6.20    4.80
  -2  14  -1   -4.70    8.00
   2 -14   1    0.30    5.10
   2 -14   1   -7.30    4.40
  -2  14  -2   -6.40    5.00
   2 -14   2   -5.00    4.30
   2 -14   2   -7.30    5.20
  -2  14  -3    3.40    5.30
   2 -14   3    6.00    5.60
   2 -14   3    0.90    3.20
  -2  14  -4  184.48   10.50
   2 -14   4  175.78    9.80
   2 -14   4  197.18   10.70
  -2  14  -5   52.49    6.80
   2 -14   5   49.10    6.20
   2 -14   5   44.20    6.80
  -2  14  -6    8.00    6.10
   2 -14   6   -7.40    6.10
   2 -14   6   -1.40    5.30
  -2  14  -7    5.20    6.60
   2 -14   7   13.00    6.80
   2 -14   7    0.80    5.60
  -2  14  -8  175.28   12.00
   2 -14   8  157.98   11.90
  -2  14  -9   12.50   12.10
  -2  14  -9    6.00    7.20
   2 -14   9   -6.10    7.00
  -2  14 -10    8.30   12.20
  -2  14 -10    1.20    7.30
   2 -14  10   -5.80    7.20
  -2  14 -11    3.40   12.10
  -2  14 -11   -9.50    7.50
   2 -14  11   -6.00    7.50
  -2  14 -12   11.00    8.10
  -2  14 -12   15.40   12.80
   2 -14  12   20.50    8.20
  -2  14 -13   -7.90    8.10
  -2  14 -13   -8.50   12.10
   2 -14  13   -9.30    7.80
  -2  14 -14   -6.40   12.70
  -2  14 -14   -3.50    8.70
   2 -14  14   -9.30    8.50
  -2  15  14   10.60    9.90
  -2  15  13   10.70   10.90
  -2  15  13    9.00    9.50
  -2  15  12   -6.80   10.60
  -2  15  12   11.90    8.50
  -2  15  11    3.90    7.80
  -2  15  11   -3.30   10.20
  -2  15  10  -10.70    7.00
  -2  15  10   -0.50    9.80
  -2  15   9    8.80    6.90
  -2  15   9   18.70   10.20
  -2  15   8    1.60    9.70
  -2  15   8  -10.00    6.10
  -2  15   7   -0.10    9.70
  -2  15   6   -4.20    9.30
  -2  15   5   34.80    9.70
  -2  15   4   -6.80    9.00
  -2  15   3   -0.10    9.20
  -2  15   2   12.30    9.20
  -2  15   2    3.90    4.70
  -2  15   1   32.00    5.30
  -2  15   1   43.80    9.60
   2 -15  -1   29.30    5.20
   2 -15  -1   38.20    5.60
  -2  15   0    8.80    9.10
  -2  15   0    7.10    5.00
   2 -15   0   -3.50    4.70
   2 -15   0    6.60    5.30
  -2  15  -1    1.50    5.00
   2 -15   1   -2.60    4.70
   2 -15   1   -2.00    5.40
  -2  15  -2   31.70    5.90
   2 -15   2   43.20    6.50
  -2  15  -3   65.79    7.00
   2 -15   3   59.99    6.90
  -2  15  -4   -1.20    5.90
   2 -15   4    6.60    6.30
  -2  15  -5   59.29    7.20
   2 -15   5   66.89    7.50
  -2  15  -6   49.60    7.40
   2 -15   6   49.10    7.50
  -2  15  -7   93.19    8.60
   2 -15   7   97.09    8.80
  -2  15  -8   18.10    7.40
   2 -15   8   21.10    7.50
  -2  15  -9  -12.00    7.30
  -2  15  -9    7.10   12.40
   2 -15   9   -7.20    7.10
  -2  15 -10   27.70   13.60
  -2  15 -10   19.80    8.00
   2 -15  10   21.20    7.90
  -2  15 -11   31.70   14.00
  -2  15 -11   26.70    8.50
   2 -15  11   32.00    8.60
  -2  15 -12    0.80    8.20
  -2  15 -12    9.60   13.50
   2 -15  12    1.40    8.00
  -2  15 -13   11.90   13.70
  -2  15 -13    1.10    8.50
   2 -15  13   -3.50    8.30
  -2  16  13   -8.50   11.80
  -2  16  12   24.90   11.90
  -2  16  11   20.70    8.90
  -2  16  11   19.90   11.30
  -2  16  10    5.70   10.80
  -2  16  10   -1.40    7.50
  -2  16   9   -2.00    6.80
  -2  16   9   -1.00   10.60
  -2  16   8    8.70   10.60
  -2  16   7    4.90   10.60
  -2  16   6  -14.20    9.60
  -2  16   5    5.70   10.40
  -2  16   4   81.59   12.20
  -2  16   3   32.50   10.60
  -2  16   2   22.80   10.00
   2 -16  -2   15.10    5.40
  -2  16   1   18.90   10.00
   2 -16  -1   21.10    5.70
  -2  16   0   22.70   10.00
  -2  16   0   20.70    5.40
   2 -16   0   19.80    5.90
  -2  16  -1   18.60    5.70
   2 -16   1   19.20    6.20
  -2  16  -2    2.10    5.90
   2 -16   2    6.40    6.20
  -2  16  -3   42.10    6.70
   2 -16   3   50.69    7.10
  -2  16  -4  170.98   11.20
   2 -16   4  157.78   11.10
  -2  16  -5   24.50    7.00
   2 -16   5   33.20    7.40
  -2  16  -6    2.10    6.90
   2 -16   6  -17.90    6.90
  -2  16  -7   22.50    7.70
   2 -16   7    9.90    7.50
  -2  16  -8   11.10    7.50
   2 -16   8   25.20    7.80
  -2  16  -9   13.50    8.00
  -2  16  -9   12.70   13.50
   2 -16   9   18.10    8.10
  -2  16 -10   34.10   14.50
  -2  16 -10    9.20    8.20
   2 -16  10    5.00    8.00
  -2  16 -11   -2.60    8.30
  -2  16 -11   -3.90   13.80
   2 -16  11   -7.20    8.20
  -2  16 -12    0.50   14.30
  -2  16 -12    1.10    8.40
   2 -16  12   20.10    8.70
  -2  17  10   -7.70   11.40
  -2  17   9   -5.40   11.20
  -2  17   8    6.40   11.10
  -2  17   7   -8.70   10.70
  -2  17   6   -0.20   11.00
  -2  17   5   -3.70   10.50
  -2  17   1   15.10   10.80
   2 -17  -1    9.80    5.80
   2 -17   0   -0.40    5.90
   2 -17   1   18.50    6.60
   2 -17   2    5.20    6.60
   2 -17   3   -1.80    6.80
   2 -17   4   -0.40    6.90
   2 -17   5   -3.80    7.30
   2 -17   6   -1.60    7.50
   2 -17   7  -10.10    7.50
   2 -17   8    5.30    7.90
  -2  17  -9  -13.60   14.20
   2 -17   9  -17.80    7.90
  -2  17 -10   -7.00   14.80
   2 -17  10  -16.50    8.20
  -2  18   9   -9.90   11.80
  -2  18   8    8.60   11.80
  -2  18   7    1.40   11.70
  -2  18   6    9.30   12.00
  -2  18   5    0.30   11.50
  -2  18   3   15.40   11.70
  -2  18   2   -1.90   11.50
  -2  18   1   -2.20   11.40
   2 -18  -1    3.90    6.30
  -2  18   0   25.80   11.90
   2 -18   0   -1.40    6.50
   2 -18   1   -9.90    6.50
   2 -18   2    3.10    6.90
   2 -18   3   -5.10    7.10
   2 -18   4   27.50    7.90
   2 -18   5   14.70    8.00
   2 -18   6   -4.00    7.90
   2 -18   7   -9.50    7.80
   2 -18   8    4.40    8.50
  -2  18  -9   11.10   15.60
   2 -18   9    7.90    8.70
  -2  19   7   -6.30   12.60
  -2  19   5   43.40   13.40
  -2  19   2   15.30   12.80
   2 -19  -1   -0.10    6.60
   2 -19   0   -3.10    6.70
   2 -19   1    4.00    7.00
   2 -19   2   38.90    7.90
   2 -19   3   24.50    7.90
   2 -19   4   -6.00    7.70
   2 -19   5    1.30    7.90
   2 -19   6   -0.10    8.30
   2 -20   0   15.40    7.50
   2 -20   1   29.30    7.80
   2 -20   2    8.70    7.80
  -3 -20   2   10.00    8.50
  -3 -20  -1    2.10    7.70
  -3 -19   7    4.50    8.50
  -3 -19   6   12.10    8.80
  -3 -19   5   -2.70    8.20
  -3 -19   4   -3.90    8.00
  -3 -19   3   -2.50    8.10
  -3 -19   0    4.60    7.20
  -3 -19  -1   -2.20    7.10
  -3 -19  -2   -5.00    7.00
  -3 -19  -3    1.70    7.10
  -3 -19  -4   -0.80    6.90
  -3 -19  -5   -1.30    6.90
  -3 -19  -6    8.60    7.20
  -3 -18   9   -7.20    8.50
   3  18  -9    1.40    9.10
  -3 -18   8    9.70    8.50
   3  18  -8    3.00    8.70
  -3 -18   7   12.70    8.40
   3  18  -7   22.00    8.60
  -3 -18   6   -7.90    7.80
   3  18  -6   -9.40    7.90
  -3 -18   5   14.90    8.10
  -3 -18   4   40.50    8.50
  -3 -18   1   21.80    7.40
  -3 -18   0   32.10    7.40
  -3 -18  -1   55.89    7.80
   3  18   1   57.79   13.40
  -3 -18  -2    8.10    6.90
   3  18   2   11.30   12.00
  -3 -18  -3    3.60    6.70
   3  18   3   -0.80   12.00
  -3 -18  -4   25.70    6.90
   3  18   4    9.10   12.00
  -3 -18  -5   72.49    8.20
   3  18   5   60.19   13.60
  -3 -18  -6   14.10    7.40
  -3 -18  -7   -3.60    7.20
   3  18   7    5.50   12.60
  -3 -18  -8   19.70    7.40
   3  18   8   30.60   12.90
  -3 -17  11    1.10    8.90
   3  17 -11   -1.50    9.00
  -3 -17  10   17.40    8.90
   3  17 -10    5.40    9.00
  -3 -17   9   12.40    8.40
   3  17  -9   15.30    8.70
  -3 -17   8   14.00    8.10
   3  17  -8    4.20    8.10
  -3 -17   7   10.60    7.80
   3  17  -7    1.50    7.60
  -3 -17   6   18.80    7.80
   3  17  -6   29.90    8.20
  -3 -17   5   22.70    7.90
   3  17  -5   24.80    7.90
  -3 -17   4   14.50    7.60
   3  17  -4   41.70    7.80
   3  17  -3   14.30    7.20
  -3 -17   2   39.90    7.30
   3  17  -2   51.39    7.60
  -3 -17   1   22.30    7.00
   3  17  -1   34.00    7.10
  -3 -17   0   36.80    7.00
   3  17   0   17.30    6.80
   3  17   0   13.80   11.40
  -3 -17  -1   -4.20    6.30
   3  17   1   -9.30   11.20
  -3 -17  -2   72.09    7.50
  -3 -17  -3   52.99    7.10
   3  17   3   48.40   12.20
  -3 -17  -4   14.90    6.90
   3  17   4    7.70   11.20
  -3 -17  -5    6.70    6.90
   3  17   5    4.00   11.10
  -3 -17  -6   46.30    7.50
   3  17   6   43.50   12.40
  -3 -17  -7   46.70    7.70
  -3 -17  -8   12.50    7.40
   3  17   8   12.00   11.90
  -3 -17  -9  -13.30    7.30
   3  17   9    3.20   12.10
  -3 -17 -10   25.30    8.00
  -3 -16  13   -2.50    9.40
   3  16 -13    5.60    9.30
  -3 -16  12    1.00    8.80
   3  16 -12   -4.80    8.80
  -3 -16  11   -5.40    8.20
   3  16 -11  -17.30    8.30
  -3 -16  10    3.30    8.30
   3  16 -10    2.90    8.40
  -3 -16   9   -0.60    7.70
   3  16  -9   10.50    8.30
  -3 -16   8   -5.80    7.50
   3  16  -8   -3.10    7.60
  -3 -16   7   12.70    7.60
   3  16  -7    4.60    7.50
  -3 -16   6    1.50    7.40
   3  16  -6   10.10    7.50
  -3 -16   5    6.30    7.20
   3  16  -5   14.90    7.10
   3  16  -4   -2.70    6.80
  -3 -16   3   18.50    6.70
   3  16  -3    1.10    6.80
  -3 -16   2   10.20    6.20
   3  16  -2   -7.40    6.30
  -3 -16   1    6.10    6.20
   3  16  -1   -7.10    9.60
   3  16  -1    2.00    6.30
  -3 -16   0   21.00    6.50
   3  16   0   20.10   10.30
   3  16   0   10.30    6.20
  -3 -16  -1   25.00    6.30
   3  16   1   18.60    6.30
  -3 -16  -2    6.50    6.00
   3  16   2    9.20   10.30
   3  16   2    8.60    6.00
  -3 -16  -3    6.30    6.40
   3  16   3   -5.50    5.80
   3  16   3    0.90   10.30
  -3 -16  -4   20.10    6.70
   3  16   4    9.10   10.50
  -3 -16  -5    8.10    6.60
   3  16   5    5.50   10.80
  -3 -16  -6    2.90    6.60
   3  16   6    4.50   10.70
  -3 -16  -7   -7.20    6.70
   3  16   7  -11.20   10.80
  -3 -16  -8   -1.80    7.00
   3  16   8   19.30   11.30
  -3 -16  -9   22.90    7.40
   3  16   9    9.70   11.20
  -3 -16 -10   11.20    7.40
   3  16  10    4.00   11.50
  -3 -16 -11   -1.10    7.40
   3  16  11    3.20   11.50
  -3 -16 -12   -3.30    7.80
   3  16  12    7.40   11.70
  -3 -15  14    8.70    9.50
   3  15 -14    3.60    9.40
  -3 -15  13    5.10    9.20
   3  15 -13    0.80    8.90
  -3 -15  12    4.10    8.50
   3  15 -12    6.70    8.60
  -3 -15  11   -3.10    7.90
   3  15 -11  -16.90    7.80
  -3 -15  10   27.30    8.40
   3  15 -10   29.70    8.50
  -3 -15   9    4.20    7.50
   3  15  -9    1.00    7.70
  -3 -15   8   -1.50    7.10
   3  15  -8    3.80    7.40
  -3 -15   7    9.50    7.10
   3  15  -7   -3.60    7.10
  -3 -15   6   66.99    8.20
   3  15  -6   69.19    8.10
  -3 -15   5   -1.20    5.80
  -3 -15   5   -4.50    6.60
   3  15  -5    3.00    6.70
  -3 -15   4    1.80    5.60
   3  15  -4    1.20    6.50
  -3 -15   3   -5.70    6.00
  -3 -15   3    4.90    5.70
   3  15  -3   -1.70    6.00
  -3 -15   2   36.00    6.10
  -3 -15   2   19.50    6.50
   3  15  -2   25.90    6.40
  -3 -15   1   -1.00    5.80
  -3 -15   1    2.60    5.70
   3  15  -1   -0.70    5.80
   3  15  -1   17.20    9.10
  -3 -15   0   -5.30    5.60
  -3 -15   0   -7.10    5.30
   3  15   0    0.10    5.80
   3  15   0    7.70    9.40
  -3 -15  -1   -7.70    5.30
  -3 -15  -1    5.50    5.30
   3  15   1   -8.30    5.40
   3  15   1   -1.70    9.30
  -3 -15  -2    0.30    5.80
   3  15   2   -1.30    5.50
   3  15   2   -6.80    9.00
  -3 -15  -3    9.50    6.00
   3  15   3    5.50    5.60
   3  15   3    5.50    9.40
  -3 -15  -4   -4.70    6.00
   3  15   4    3.60    5.70
   3  15   4    3.70    9.40
  -3 -15  -5   12.40    6.40
   3  15   5    7.70    5.90
   3  15   5   16.00   10.00
  -3 -15  -6   54.79    7.20
   3  15   6   40.90   10.70
  -3 -15  -7    7.20    6.70
   3  15   7    2.80   10.60
  -3 -15  -8    9.20    6.60
   3  15   8    2.20   10.00
  -3 -15  -9    0.40    6.70
   3  15   9   10.40   10.40
  -3 -15 -10    6.10    7.00
   3  15  10   15.50   10.60
  -3 -15 -11    1.60    7.30
   3  15  11    9.30   11.30
  -3 -15 -12    7.20    7.60
   3  15  12   -5.10   11.70
  -3 -15 -13    4.20    7.60
   3  15  13   -2.30   11.30
  -3 -14  15   34.70   10.10
   3  14 -15   43.90   10.30
  -3 -14  14   -6.40    9.10
   3  14 -14   -4.40    8.70
  -3 -14  13  -11.10    8.50
   3  14 -13   -4.10    8.40
  -3 -14  12   21.60    8.50
   3  14 -12   19.70    8.50
  -3 -14  11   45.00    8.60
   3  14 -11   36.50    8.70
  -3 -14  10  -11.90    7.40
   3  14 -10  -13.30    7.60
  -3 -14   9   -2.90    7.00
   3  14  -9   -1.10    7.20
  -3 -14   8    9.70    6.80
   3  14  -8   14.20    7.10
  -3 -14   7   82.39    8.10
   3  14  -7   89.69    8.40
  -3 -14   6   47.50    6.60
  -3 -14   6   46.60    7.10
   3  14  -6   49.20    7.10
  -3 -14   5   -6.30    5.20
   3  14  -5    1.00    6.10
  -3 -14   4   11.40    6.00
  -3 -14   4   12.00    5.40
   3  14  -4   22.80    6.30
  -3 -14   3   52.99    6.10
  -3 -14   3   42.60    6.30
   3  14  -3   50.29    6.60
  -3 -14   2   -3.00    5.20
  -3 -14   2  -15.30    5.20
   3  14  -2   -6.70    5.40
  -3 -14   1    3.10    5.20
  -3 -14   1   14.00    5.30
   3  14  -1    7.80    5.50
   3  14  -1   11.20    8.50
  -3 -14   0    5.10    5.20
  -3 -14   0   12.70    5.20
   3  14   0    1.30    5.40
   3  14   0    9.10    8.50
  -3 -14  -1   87.89    7.70
  -3 -14  -1  136.49    9.60
   3  14   1  135.49    9.10
   3  14   1  135.59   13.10
  -3 -14  -2    3.70    5.70
  -3 -14  -2    1.80    2.80
   3  14   2    2.40    5.30
   3  14   2   14.90    8.90
  -3 -14  -3    2.80    4.40
  -3 -14  -3   18.50    5.90
   3  14   3   19.40    5.50
   3  14   3   14.90    8.80
  -3 -14  -4   59.79    6.50
  -3 -14  -4   49.00    6.00
   3  14   4   47.30    9.70
   3  14   4   52.79    6.20
  -3 -14  -5  151.88    9.80
  -3 -14  -5  139.59    9.30
   3  14   5  144.19    9.60
   3  14   5  151.78   13.90
  -3 -14  -6    3.50    5.90
   3  14   6   -0.70    5.30
   3  14   6    9.20    9.20
  -3 -14  -7   34.90    6.60
   3  14   7   35.50    9.60
   3  14   7   23.70    5.80
  -3 -14  -8   48.80    7.00
   3  14   8   37.40   10.40
  -3 -14  -9  127.19   10.10
   3  14   9   95.39   12.00
  -3 -14 -10   19.00    7.00
   3  14  10   10.20   10.20
  -3 -14 -11    1.20    6.90
   3  14  11   11.60   10.30
  -3 -14 -12   20.80    7.30
   3  14  12   16.60   11.00
  -3 -14 -13   51.99    8.10
   3  14  13   43.30   11.90
  -3 -14 -14    8.20    7.80
   3  14  14   -2.70   11.40
  -3 -13  16   23.20    9.90
   3  13 -16    1.70    9.60
  -3 -13  15  -14.80    8.80
   3  13 -15  -12.00    8.90
  -3 -13  14   31.00    9.50
   3  13 -14   25.90    9.00
  -3 -13  13   -1.40    8.20
   3  13 -13    3.30    8.10
  -3 -13  12   -6.50    7.60
   3  13 -12    2.00    7.90
  -3 -13  11  -10.20    7.60
   3  13 -11  -22.10    7.50
  -3 -13  10   24.00    7.60
   3  13 -10   36.00    8.10
  -3 -13   9   27.20    7.00
   3  13  -9   28.60    7.20
  -3 -13   8   31.50    6.90
   3  13  -8   36.70    7.10
  -3 -13   7   14.30    6.30
   3  13  -7   18.80    6.50
  -3 -13   6  104.89    9.70
  -3 -13   6   95.69    9.10
   3  13  -6  105.69    9.90
  -3 -13   5   32.90    5.60
   3  13  -5   31.00    6.30
  -3 -13   4    2.80    5.10
  -3 -13   4   -0.70    4.80
   3  13  -4    2.60    5.50
  -3 -13   3    1.70    4.70
  -3 -13   3   -1.60    5.10
   3  13  -3    2.90    5.20
  -3 -13   2   17.40    5.20
  -3 -13   2   29.50    5.30
   3  13  -2   21.40    5.40
  -3 -13   1   25.30    5.20
  -3 -13   1   32.60    5.10
   3  13  -1   26.90    5.40
   3  13  -1   25.30    8.10
  -3 -13   0   -2.00    4.10
  -3 -13   0    4.50    4.90
   3  13   0   -1.00    7.70
   3  13   0    1.20    5.00
  -3 -13  -1   17.70    5.20
  -3 -13  -1    1.80    2.80
   3  13   1   17.00    8.00
   3  13   1   11.60    5.10
  -3 -13  -2  178.58    9.30
   3  13   2  159.58   12.90
   3  13   2  158.88    9.20
  -3 -13  -3  102.59    8.30
  -3 -13  -3  127.69    8.70
   3  13   3  109.49    8.50
   3  13   3  119.79   12.30
  -3 -13  -4   69.69    6.20
  -3 -13  -4   95.59    8.50
   3  13   4   88.39    8.20
   3  13   4   72.39    9.60
  -3 -13  -5   -2.20    5.50
  -3 -13  -5   -1.40    4.80
   3  13   5   -8.40    4.90
   3  13   5    6.30    8.30
  -3 -13  -6   31.10    6.00
  -3 -13  -6   17.60    5.20
   3  13   6   20.20    5.40
   3  13   6   23.40    8.60
  -3 -13  -7   20.90    5.30
  -3 -13  -7   20.10    5.90
   3  13   7   34.10    9.20
   3  13   7   32.00    5.70
  -3 -13  -8   12.90    6.20
  -3 -13  -8    8.00    5.70
   3  13   8    7.60    5.30
   3  13   8    9.80    8.80
  -3 -13  -9    8.40    6.30
   3  13   9    7.20    9.10
   3  13   9   -0.20    5.30
  -3 -13 -10   42.80    7.10
   3  13  10   52.39   10.50
  -3 -13 -11   14.90    6.80
   3  13  11   26.70   10.20
  -3 -13 -12   37.70    7.40
   3  13  12   40.90   10.90
  -3 -13 -13    5.10    7.40
   3  13  13    6.10   10.50
  -3 -13 -14   32.30    8.10
   3  13  14   39.20   11.90
  -3 -13 -15   19.80    8.30
  -3 -12  17    2.80    9.80
   3  12 -17   -6.40    9.20
  -3 -12  16    0.60    9.30
   3  12 -16   -4.10    9.00
  -3 -12  15   12.40    9.10
   3  12 -15   25.50    9.20
  -3 -12  14   -7.70    8.40
   3  12 -14   -1.90    8.10
   3  12 -14    4.70   10.30
  -3 -12  13    6.60    8.00
   3  12 -13    1.60    7.80
  -3 -12  12  -10.90    7.60
   3  12 -12   -4.50    7.90
  -3 -12  11    3.80    7.10
   3  12 -11   -0.40    7.20
   3  12 -11    4.20    5.50
  -3 -12  10   -1.80    6.60
   3  12 -10    1.20    6.80
  -3 -12   9    1.00    6.30
   3  12  -9    4.80    6.30
  -3 -12   8   13.70    6.30
   3  12  -8    4.60    6.30
  -3 -12   7   13.20    6.00
  -3 -12   7    9.50    5.40
   3  12  -7   11.60    6.20
  -3 -12   6   14.10    5.70
  -3 -12   6   13.00    5.00
   3  12  -6    9.90    5.60
  -3 -12   5   -9.00    4.80
  -3 -12   5   -0.30    4.60
   3  12  -5   -5.40    5.10
  -3 -12   4   -8.30    4.80
  -3 -12   4  -11.40    4.50
   3  12  -4   -5.80    5.10
  -3 -12   3  -11.20    4.60
  -3 -12   3   -4.30    4.40
   3  12  -3   -4.70    4.80
  -3 -12   2   -2.90    4.40
  -3 -12   2   -3.20    4.30
   3  12  -2   -1.60    6.60
   3  12  -2   -3.90    4.60
  -3 -12   1   22.10    4.60
  -3 -12   1   13.30    4.50
   3  12  -1   20.50    4.80
   3  12  -1   26.70    7.30
  -3 -12   0   30.80    5.10
   3  12   0   35.10    7.60
   3  12   0   34.40    5.00
  -3 -12  -1   11.60    3.70
  -3 -12  -1   27.40    4.90
   3  12   1   22.00    7.20
   3  12   1   18.50    4.80
  -3 -12  -2   -4.40    4.10
  -3 -12  -2    1.30    4.50
   3  12   2    5.90    4.50
   3  12   2   -0.20    6.70
  -3 -12  -3    5.10    4.70
  -3 -12  -3    5.40    4.40
   3  12   3    4.60    4.50
   3  12   3   -6.00    6.90
  -3 -12  -4    0.90    4.70
  -3 -12  -4   -2.50    4.40
   3  12   4   -1.40    4.40
   3  12   4   -8.60    7.20
  -3 -12  -5   11.10    5.10
  -3 -12  -5    3.50    4.60
   3  12   5    9.70    4.70
   3  12   5   12.00    7.60
  -3 -12  -6    2.20    4.60
  -3 -12  -6   -2.40    5.10
   3  12   6   -5.80    7.50
   3  12   6    2.30    4.60
  -3 -12  -7    5.10    5.40
  -3 -12  -7    9.60    5.40
  -3 -12  -7    3.70    4.60
   3  12   7    8.40    5.00
   3  12   7   11.90    8.10
  -3 -12  -8   10.00    5.60
  -3 -12  -8   -0.20    5.60
  -3 -12  -8   -0.10    4.70
   3  12   8    3.60    8.20
   3  12   8    4.10    5.10
  -3 -12  -9   -0.70    5.80
  -3 -12  -9    1.10    6.00
   3  12   9   -3.60    5.20
   3  12   9    0.00    8.30
  -3 -12 -10   -0.50    6.10
   3  12  10    6.20    8.70
   3  12  10   -3.10    5.30
  -3 -12 -11    2.80    6.60
   3  12  11    4.80    9.50
  -3 -12 -12   -2.90    6.90
  -3 -12 -13    5.70    7.40
  -3 -12 -14    3.80    7.60
  -3 -12 -15   -0.20    8.00
  -3 -12 -16    1.10    8.70
  -3 -11  17   -7.80    9.70
   3  11 -17  -10.20    9.10
  -3 -11  16    1.30    8.60
   3  11 -16    1.40    8.80
  -3 -11  15  -10.60    8.40
   3  11 -15   -8.00    8.20
  -3 -11  14   54.09    9.10
   3  11 -14   50.69   11.10
   3  11 -14   50.99    9.10
  -3 -11  13   -7.10    7.60
   3  11 -13  -14.20    7.40
  -3 -11  12   -3.20    6.90
   3  11 -12   -6.30    5.80
   3  11 -12    2.90    7.20
  -3 -11  11   11.50    6.90
   3  11 -11    6.10    5.60
   3  11 -11   22.60    7.20
  -3 -11  10   73.19    7.80
   3  11 -10   71.79    8.40
   3  11 -10   89.99    8.00
  -3 -11   9   -6.60    5.80
   3  11  -9    6.20    6.00
  -3 -11   8   19.90    5.90
   3  11  -8   33.50    6.20
  -3 -11   7  -10.40    5.30
  -3 -11   7   -2.30    4.70
   3  11  -7   -6.50    5.30
  -3 -11   6  100.39    8.30
   3  11  -6   99.69    8.70
  -3 -11   5   15.80    4.70
  -3 -11   5   12.80    4.80
   3  11  -5   19.00    5.30
  -3 -11   4   62.79    5.30
  -3 -11   4   49.10    5.40
   3  11  -4   57.89    5.60
  -3 -11   3   -2.40    3.90
  -3 -11   3    1.00    4.10
   3  11  -3   -2.20    4.20
  -3 -11   2    0.00    4.00
  -3 -11   2   -1.40    4.10
   3  11  -2   -4.00    4.10
   3  11  -2   -2.90    5.90
  -3 -11   1   -2.50    2.70
  -3 -11   1   -9.20    4.20
   3  11  -1   12.30    6.40
   3  11  -1   -1.30    4.30
  -3 -11   0  -13.00    4.10
  -3 -11   0    0.10    3.00
   3  11   0   -2.60    4.20
   3  11   0   -3.40    6.10
  -3 -11  -1   -7.00    4.30
  -3 -11  -1   -1.40    4.00
   3  11   1   -3.30    4.00
   3  11   1   -3.00    6.10
  -3 -11  -2   55.09    5.00
  -3 -11  -2   54.49    5.00
   3  11   2   58.29    5.10
   3  11   2   55.99    7.50
  -3 -11  -3   25.90    4.50
  -3 -11  -3   22.10    4.70
   3  11   3   20.80    6.90
   3  11   3   23.20    4.40
  -3 -11  -4  133.19    8.00
  -3 -11  -4  121.69    7.80
   3  11   4  130.59   10.90
   3  11   4  125.89    7.60
  -3 -11  -5    2.70    4.50
  -3 -11  -5    1.50    4.20
   3  11   5   -0.40    6.50
   3  11   5    0.70    4.10
  -3 -11  -6   30.40    5.10
  -3 -11  -6   37.60    4.90
   3  11   6   37.50    4.90
   3  11   6   44.70    7.90
  -3 -11  -7   -4.50    5.00
  -3 -11  -7   -0.50    4.20
  -3 -11  -7   -6.80    4.80
   3  11   7   -3.50    4.40
   3  11   7  -12.10    7.20
  -3 -11  -8    1.50    5.30
  -3 -11  -8    0.20    4.30
  -3 -11  -8    3.40    5.50
   3  11   8   -2.70    7.40
   3  11   8    5.10    4.80
  -3 -11  -9   16.20    4.70
  -3 -11  -9    6.20    5.90
  -3 -11  -9   -4.30    5.40
   3  11   9    4.30    5.10
   3  11   9    0.90    7.70
  -3 -11 -10   25.80    5.00
  -3 -11 -10   24.10    6.30
   3  11  10   21.50    5.70
  -3 -11 -11    7.90    6.50
   3  11  11   13.00    5.90
  -3 -11 -12   46.10    7.50
   3  11  12   49.30    6.80
  -3 -11 -13    2.40    7.20
  -3 -11 -14   -2.80    7.50
  -3 -11 -15   -1.30    8.00
  -3 -11 -16    4.60    8.90
  -3 -10  18    0.80    9.70
   3  10 -18   -8.70    9.20
  -3 -10  17   47.30   10.20
   3  10 -17   53.69   10.00
  -3 -10  16   17.70    9.00
   3  10 -16   18.80    8.80
  -3 -10  15  165.38   13.40
   3  10 -15  137.99   13.20
  -3 -10  14   23.50    8.10
   3  10 -14   12.30    7.90
  -3 -10  13  -14.60    7.10
   3  10 -13   -5.30    7.00
  -3 -10  12    8.00    6.80
   3  10 -12   12.90    6.80
   3  10 -12    5.20    5.20
  -3 -10  11   19.10    6.60
   3  10 -11   10.10    5.10
   3  10 -11   31.10    7.10
  -3 -10  10   -2.70    5.90
   3  10 -10   -4.20    4.30
   3  10 -10    7.30    6.00
  -3 -10   9   19.80    6.00
   3  10  -9   19.10    5.90
   3  10  -9   19.80    4.80
  -3 -10   8   39.10    5.90
  -3 -10   8   41.00    5.50
   3  10  -8   37.10    6.10
  -3 -10   7  372.56   13.50
  -3 -10   7  397.96   13.50
   3  10  -7  372.06   13.50
  -3 -10   6   21.20    4.60
   3  10  -6   27.50    5.20
  -3 -10   5    1.00    4.10
  -3 -10   5   -2.50    3.90
   3  10  -5    0.80    4.30
  -3 -10   4   35.50    4.50
  -3 -10   4   35.40    4.70
  -3 -10   4   30.40    5.90
   3  10  -4   38.00    4.80
  -3 -10   3  249.48    9.60
  -3 -10   3  224.28    9.70
  -3 -10   3  239.58   11.40
   3  10  -3  241.58    9.60
   3  10  -3  248.08    9.20
  -3 -10   2    7.50    3.20
  -3 -10   2   13.40    3.90
  -3 -10   2    7.50    5.40
   3  10  -2   19.20    5.80
   3  10  -2   15.10    3.70
   3  10  -2   16.80    4.20
  -3 -10   1   23.40    4.30
  -3 -10   1   19.50    5.60
   3  10  -1   25.10    4.30
   3  10  -1   29.70    6.30
   3  10  -1   27.40    3.90
  -3 -10   0   23.00    4.30
  -3 -10   0   10.50    5.50
  -3 -10   0   29.00    4.20
   3  10   0   30.40    3.90
   3  10   0   34.10    4.40
   3  10   0   28.20    6.10
  -3 -10  -1  575.74   16.40
  -3 -10  -1  598.74   16.50
  -3 -10  -1  600.84   19.70
   3  10   1  576.24   16.40
   3  10   1  579.24   19.70
   3  10   1  557.34   16.20
  -3 -10  -2   37.80    4.50
  -3 -10  -2   33.70    4.40
   3  10   2   35.40    4.00
   3  10   2   54.59    6.80
   3  10   2   38.10    4.50
  -3 -10  -3   11.60    4.00
  -3 -10  -3   15.40    4.00
   3  10   3   14.40    3.70
   3  10   3   15.50    3.90
   3  10   3   11.00    6.00
  -3 -10  -4   25.70    4.40
  -3 -10  -4   30.80    4.60
   3  10   4   33.80    4.40
   3  10   4   22.30    3.80
   3  10   4   32.90    6.50
  -3 -10  -5  456.25   14.30
  -3 -10  -5  477.95   14.30
   3  10   5  469.35   14.10
   3  10   5  492.95   18.00
  -3 -10  -6    9.50    4.50
  -3 -10  -6   12.40    4.40
  -3 -10  -6    0.40    3.90
   3  10   6    7.10    4.10
   3  10   6   -2.10    6.60
  -3 -10  -7   10.20    4.50
  -3 -10  -7    2.30    4.90
  -3 -10  -7    7.80    4.00
   3  10   7   10.00    4.40
   3  10   7    2.90    6.70
  -3 -10  -8   40.60    5.60
  -3 -10  -8   52.29    5.10
  -3 -10  -8   41.70    6.30
   3  10   8   45.00    8.00
   3  10   8   44.10    5.40
  -3 -10  -9  120.99    8.00
  -3 -10  -9  111.79   10.30
  -3 -10  -9  114.79    9.00
   3  10   9  125.89    8.90
  -3 -10 -10    5.70    5.70
  -3 -10 -10    3.40    4.10
   3  10  10    1.30    5.20
  -3 -10 -11   -5.50    6.10
  -3 -10 -11    0.70    2.70
   3  10  11   -2.70    5.50
  -3 -10 -12   19.50    7.00
   3  10  12   16.10    6.10
  -3 -10 -13  160.68   12.00
   3  10  13  169.78   11.50
  -3 -10 -14    4.10    7.50
  -3 -10 -15   -3.70    7.90
  -3 -10 -16    3.50    8.40
  -3 -10 -17   36.60    9.90
  -3  -9  19   -8.80    9.60
   3   9 -19   -8.80    9.50
  -3  -9  18   49.70   10.30
   3   9 -18   59.89   10.20
  -3  -9  17  -14.10    8.70
   3   9 -17    4.80    8.70
  -3  -9  16   33.20    9.10
   3   9 -16   34.70    8.70
  -3  -9  15   -2.40    7.60
   3   9 -15   -0.20    7.70
  -3  -9  14   48.50    8.30
   3   9 -14   55.29    8.40
  -3  -9  13    2.10    7.00
   3   9 -13   -2.50    6.70
  -3  -9  12   28.20    6.80
   3   9 -12    9.70    5.70
   3   9 -12   24.90    6.80
  -3  -9  11   -8.10    6.00
   3   9 -11    1.50    4.80
   3   9 -11   -1.90    6.00
  -3  -9  10   50.09    6.50
   3   9 -10   46.10    6.60
   3   9 -10   37.80    5.30
  -3  -9   9   13.90    5.40
   3   9  -9   16.60    5.30
   3   9  -9    7.30    4.10
  -3  -9   8  133.79    8.40
  -3  -9   8  123.09    8.70
   3   9  -8  106.79    7.30
   3   9  -8  119.09    8.80
  -3  -9   7    4.00    4.60
  -3  -9   7    7.40    4.10
   3   9  -7    8.10    4.60
  -3  -9   6  149.99    8.10
  -3  -9   6  127.79    8.80
   3   9  -6  152.08    8.40
   3   9  -6  144.59    7.90
  -3  -9   5    8.50    4.60
  -3  -9   5   -0.30    3.70
  -3  -9   5   -2.20    3.80
   3   9  -5    1.80    3.20
   3   9  -5    3.10    4.00
  -3  -9   4   19.50    5.20
  -3  -9   4   32.40    4.10
  -3  -9   4   28.00    4.20
   3   9  -4   34.80    4.40
  -3  -9   3   60.69    5.70
  -3  -9   3   68.39    6.40
  -3  -9   3   49.60    5.60
   3   9  -3   66.89    6.30
   3   9  -3   50.79    4.60
  -3  -9   2  153.78    9.10
  -3  -9   2  142.79    7.50
   3   9  -2  139.69    9.30
   3   9  -2  145.09    7.60
   3   9  -2  156.28    7.10
  -3  -9   1  148.99    7.50
  -3  -9   1  136.49    7.10
  -3  -9   1  147.49    9.10
   3   9  -1  150.08    9.50
   3   9  -1  144.09    7.10
   3   9  -1  153.18    7.40
  -3  -9   0  130.19    7.00
  -3  -9   0  110.89    8.70
  -3  -9   0  117.09    6.90
   3   9   0  114.49    9.00
   3   9   0  123.09    6.70
   3   9   0  126.89    6.90
  -3  -9  -1   -2.40    4.50
  -3  -9  -1    9.80    3.50
  -3  -9  -1    7.80    3.40
   3   9   1   -9.90    5.20
   3   9   1    9.90    3.60
   3   9   1    8.30    3.00
  -3  -9  -2   92.39    6.60
  -3  -9  -2  101.79    6.40
   3   9   2   91.49    8.80
   3   9   2   97.39    6.10
   3   9   2   96.29    6.30
  -3  -9  -3   33.80    4.20
  -3  -9  -3   36.00    4.20
   3   9   3   37.60    5.90
   3   9   3   38.10    4.10
   3   9   3   30.40    3.90
  -3  -9  -4  213.78    8.70
  -3  -9  -4  188.48    8.30
   3   9   4  202.38    8.40
   3   9   4  212.08   11.00
   3   9   4  214.28   14.60
   3   9   4  188.58    8.20
  -3  -9  -5    0.60    3.70
  -3  -9  -5   -2.20    3.70
  -3  -9  -5   -1.00    2.50
   3   9   5   -0.40    3.60
   3   9   5    0.70    3.40
   3   9   5   -0.60    5.70
   3   9   5    3.60    6.00
  -3  -9  -6  198.38    9.70
  -3  -9  -6  195.18    8.80
  -3  -9  -6  206.18    8.70
   3   9   6  210.88   15.10
   3   9   6  190.78    8.70
   3   9   6  184.18    8.40
   3   9   6  188.28   11.40
  -3  -9  -7   86.59    7.50
  -3  -9  -7   92.49    7.00
  -3  -9  -7   97.29    8.20
   3   9   7  101.29   12.70
   3   9   7   87.19    7.50
  -3  -9  -8  143.79    8.70
  -3  -9  -8  155.08    8.10
  -3  -9  -8  153.48   10.00
   3   9   8  150.78    8.50
   3   9   8  149.49   14.20
  -3  -9  -9   13.30    5.90
  -3  -9  -9   20.60    5.30
  -3  -9  -9   18.10    4.20
   3   9   9   17.30    5.10
   3   9   9    5.80    7.50
  -3  -9 -10   50.69    6.50
  -3  -9 -10   29.80    4.30
   3   9  10   51.89    6.00
  -3  -9 -11   14.90    6.20
   3   9  11   14.70    5.60
  -3  -9 -12   38.30    5.40
  -3  -9 -12   51.49    7.30
   3   9  12   41.20    6.50
  -3  -9 -13    1.40    7.00
   3   9  13   -6.60    6.10
  -3  -9 -14   41.40    8.10
   3   9  14   46.70    7.30
  -3  -9 -15    4.70    8.00
  -3  -9 -16   31.30    8.90
  -3  -9 -17    1.80    8.90
  -3  -9 -18    7.40    9.90
  -3  -8  19   26.40    9.90
   3   8 -19    7.90    9.40
  -3  -8  18   -6.90    9.00
   3   8 -18   11.80    9.00
  -3  -8  17   -8.40    8.30
   3   8 -17  -12.30    8.10
  -3  -8  16   -6.50    8.00
   3   8 -16  -17.70    7.80
  -3  -8  15   -8.60    7.30
   3   8 -15   -1.90    7.40
  -3  -8  14  -14.30    6.80
   3   8 -14    3.60    6.90
  -3  -8  13   26.30    7.10
   3   8 -13   32.90    7.00
  -3  -8  12    4.40    7.00
  -3  -8  12   -3.90    6.20
   3   8 -12    5.60    6.30
  -3  -8  11  137.59    9.80
  -3  -8  11  135.59   10.40
   3   8 -11  118.79    9.70
   3   8 -11  117.79    9.50
  -3  -8  10   11.10    5.60
  -3  -8  10    3.50    5.20
   3   8 -10    1.70    4.50
   3   8 -10    7.80    5.30
  -3  -8   9   29.00    5.30
  -3  -8   9   26.20    4.90
  -3  -8   9   24.90    5.20
   3   8  -9   21.00    5.00
   3   8  -9   16.70    4.50
  -3  -8   8   10.70    4.70
  -3  -8   8    8.70    4.40
  -3  -8   8   14.80    4.30
   3   8  -8    7.40    3.60
   3   8  -8    2.70    4.50
  -3  -8   7  116.29    7.60
  -3  -8   7   93.19    7.80
   3   8  -7  112.69    7.80
   3   8  -7  122.99    7.30
  -3  -8   6   -6.10    4.10
  -3  -8   6    3.30    3.70
   3   8  -6    4.80    4.20
   3   8  -6   -0.60    3.30
  -3  -8   5   38.10    4.50
  -3  -8   5   43.10    5.10
  -3  -8   5   43.90    4.30
   3   8  -5   37.60    4.00
   3   8  -5   47.40    4.60
  -3  -8   4   27.10    4.70
  -3  -8   4   16.70    3.80
  -3  -8   4   22.70    3.90
   3   8  -4   23.50    4.00
   3   8  -4   25.00    3.30
  -3  -8   3    0.30    3.10
  -3  -8   3    1.00    2.20
  -3  -8   3    3.10    4.20
   3   8  -3    1.00    0.70
   3   8  -3    0.00    3.40
  -3  -8   2   89.59    7.60
  -3  -8   2   84.19    6.30
  -3  -8   2   71.69    5.60
   3   8  -2   98.99    6.40
   3   8  -2   98.19    8.00
   3   8  -2   80.29    5.40
  -3  -8   1  106.49    7.80
  -3  -8   1   91.59    6.50
  -3  -8   1   98.19    6.20
   3   8  -1  112.79    8.10
   3   8  -1   93.29    6.40
   3   8  -1   84.49    6.00
  -3  -8   0    3.30    4.40
  -3  -8   0   -2.00    3.00
  -3  -8   0    3.10    3.20
   3   8   0    1.10    3.30
   3   8   0    4.70    4.80
   3   8   0    1.30    3.10
  -3  -8  -1   11.20    3.50
  -3  -8  -1   13.80    3.30
  -3  -8  -1   12.10    4.60
   3   8   1   11.30    3.40
   3   8   1    9.10    3.00
   3   8   1   17.70    4.90
  -3  -8  -2   -2.50    3.20
  -3  -8  -2    0.90    3.00
   3   8   2   10.30    4.90
   3   8   2   -0.80    3.10
   3   8   2   -0.30    2.90
  -3  -8  -3   95.19    6.20
  -3  -8  -3  105.39    6.50
   3   8   3  100.49    8.30
   3   8   3   98.99    6.40
   3   8   3  105.19   10.80
   3   8   3   98.59    6.20
  -3  -8  -4    4.70    3.50
  -3  -8  -4   -3.00    3.60
   3   8   4   -3.10    3.20
   3   8   4    9.80    5.30
   3   8   4  -11.10    3.30
   3   8   4   -6.30    5.00
  -3  -8  -5    2.80    3.40
  -3  -8  -5    3.90    3.60
  -3  -8  -5   -0.80    2.40
   3   8   5    9.40    5.90
   3   8   5    4.20    3.20
   3   8   5    6.40    3.60
   3   8   5    3.50    5.20
  -3  -8  -6   18.00    4.40
  -3  -8  -6   11.60    3.90
  -3  -8  -6   13.30    3.70
   3   8   6   20.00    6.30
   3   8   6   10.50    4.00
   3   8   6    8.50    3.40
  -3  -8  -7  115.59    8.60
  -3  -8  -7  135.89    7.20
  -3  -8  -7  118.59    7.60
   3   8   7  108.39    7.50
   3   8   7  111.29    6.70
   3   8   7  125.79   12.60
  -3  -8  -8    1.40    4.90
  -3  -8  -8   -7.30    4.40
  -3  -8  -8    4.00    3.60
   3   8   8    2.30    6.10
   3   8   8   -1.20    4.30
  -3  -8  -9   43.10    5.60
  -3  -8  -9   45.10    4.70
  -3  -8  -9   44.80    6.40
   3   8   9   47.50    5.30
   3   8   9   35.20    7.50
  -3  -8 -10   -2.00    2.60
  -3  -8 -10   -6.30    5.00
   3   8  10   -6.10    6.70
   3   8  10   -0.10    4.90
  -3  -8 -11    0.00    5.40
  -3  -8 -11    0.50    3.00
   3   8  11    3.50    5.30
   3   8  11  -13.40    7.40
  -3  -8 -12   13.60    4.70
  -3  -8 -12   17.90    6.40
   3   8  12   -5.80    8.10
   3   8  12   15.40    6.00
  -3  -8 -13    2.80    6.60
   3   8  13   18.30    6.40
   3   8  13   -4.20    8.90
  -3  -8 -14   18.20    7.40
   3   8  14   17.50    6.70
  -3  -8 -15    6.90    7.70
   3   8  15   12.50    7.10
  -3  -8 -16   10.00    8.30
  -3  -8 -17    4.30    8.40
  -3  -8 -18   -3.40    9.00
  -3  -7  19   -2.10    9.10
   3   7 -19   -3.20    8.90
  -3  -7  18   35.00    9.40
   3   7 -18   23.10    8.90
  -3  -7  17   -2.90    8.20
   3   7 -17   -0.50    8.10
  -3  -7  16   -9.40    7.70
   3   7 -16  -16.70    7.40
  -3  -7  15   -2.60    8.50
  -3  -7  15   -6.50    7.30
   3   7 -15   -9.10    7.00
  -3  -7  14   95.29   10.00
  -3  -7  14   82.29    8.40
   3   7 -14   67.59    8.00
  -3  -7  13    9.00    7.40
  -3  -7  13    5.50    6.40
   3   7 -13   -3.40    6.30
  -3  -7  12  191.48   12.00
  -3  -7  12  174.58   10.80
   3   7 -12  160.48   10.50
  -3  -7  11    3.30    6.00
  -3  -7  11    8.00    5.30
   3   7 -11    7.70    5.40
   3   7 -11   -4.30    4.80
  -3  -7  10  107.49    8.90
  -3  -7  10  116.59    9.10
   3   7 -10  108.49    8.80
   3   7 -10   90.99    8.30
  -3  -7   9   27.70    5.10
  -3  -7   9   30.40    5.50
  -3  -7   9   27.10    4.80
   3   7  -9   17.60    4.60
   3   7  -9   24.10    4.80
   3   7  -9   33.50    5.20
  -3  -7   8   64.39    7.10
  -3  -7   8   68.59    5.60
  -3  -7   8   67.69    5.30
   3   7  -8   56.09    4.90
   3   7  -8   55.99    5.30
   3   7  -8   49.70    5.00
  -3  -7   7   49.10    4.80
  -3  -7   7   43.70    4.60
  -3  -7   7   47.80    5.00
   3   7  -7   46.60    4.50
   3   7  -7   47.30    4.90
   3   7  -7   39.30    4.30
  -3  -7   6  227.28    9.30
  -3  -7   6  237.68    9.20
   3   7  -6  227.98    8.90
   3   7  -6  236.08    9.30
   3   7  -6  226.38    9.30
  -3  -7   5   73.79    6.20
  -3  -7   5   70.79    6.20
  -3  -7   5   76.19    6.80
   3   7  -5   68.39    6.20
   3   7  -5   70.39    5.90
  -3  -7   4  165.18    8.50
  -3  -7   4  174.68    7.60
   3   7  -4  173.68    7.60
   3   7  -4  179.68    7.40
  -3  -7   3   37.20    3.60
  -3  -7   3   33.90    4.50
   3   7  -3   30.80    3.20
   3   7  -3   38.90    3.80
  -3  -7   2   62.99    5.30
  -3  -7   2   62.99    5.60
  -3  -7   2   73.29    6.80
   3   7  -2   68.79    7.20
   3   7  -2   66.79    5.60
  -3  -7   1   25.60    4.50
  -3  -7   1   22.90    3.30
  -3  -7   1   25.20    3.60
   3   7  -1   19.10    4.70
   3   7  -1   20.20    3.30
   3   7  -1   20.10    3.00
  -3  -7   0   37.90    4.70
  -3  -7   0   33.90    3.60
  -3  -7   0   31.00    3.50
   3   7   0   32.30    3.40
   3   7   0   41.90    5.20
   3   7   0   33.20    3.50
  -3  -7  -1    3.80    3.90
  -3  -7  -1    0.10    2.70
  -3  -7  -1    0.40    3.10
   3   7   1   -0.70    4.40
   3   7   1    0.50    2.90
   3   7   1   -0.30    2.60
  -3  -7  -2   34.40    3.40
  -3  -7  -2   40.50    3.70
   3   7   2   44.00    3.70
   3   7   2   35.10    3.60
   3   7   2   36.20    4.90
   3   7   2   41.60    6.10
  -3  -7  -3   22.20    3.30
  -3  -7  -3   29.20    3.70
   3   7   3   24.30    3.30
   3   7   3   13.20    5.90
   3   7   3   35.40    5.20
   3   7   3   22.50    3.30
  -3  -7  -4  175.28    7.80
  -3  -7  -4  167.98    7.50
  -3  -7  -4  160.78    7.20
   3   7   4  167.08    7.40
   3   7   4  179.78    7.40
   3   7   4  173.98    9.30
   3   7   4  165.28   13.20
  -3  -7  -5    0.20    2.40
  -3  -7  -5    4.30    3.30
  -3  -7  -5   -1.70    3.30
   3   7   5    6.10    5.40
   3   7   5   -0.20    3.00
   3   7   5    3.30    3.30
  -3  -7  -6  230.78    8.70
  -3  -7  -6  234.38   10.20
  -3  -7  -6  214.58    8.90
   3   7   6  229.08   15.00
   3   7   6  222.78    8.90
   3   7   6  229.38    8.50
  -3  -7  -7    8.20    3.40
  -3  -7  -7    6.40    3.90
  -3  -7  -7    7.30    4.40
   3   7   7    0.20    3.90
   3   7   7    7.90    5.70
   3   7   7    7.20    3.20
  -3  -7  -8   42.40    4.70
  -3  -7  -8   32.60    5.70
  -3  -7  -8   43.40    4.20
   3   7   8   44.50    4.70
   3   7   8   36.10    4.10
   3   7   8   33.20    6.80
  -3  -7  -9   14.10    4.50
  -3  -7  -9   21.70    5.70
  -3  -7  -9   19.10    3.90
   3   7   9    7.20    6.60
   3   7   9   16.40    4.60
  -3  -7 -10   45.00    5.60
   3   7  10   62.99    5.90
   3   7  10   47.50    8.40
  -3  -7 -11    2.30    5.30
  -3  -7 -11   -3.90    3.90
   3   7  11    3.40    5.10
  -3  -7 -12   10.80    6.00
  -3  -7 -12    4.50    4.50
   3   7  12   -7.60    7.80
   3   7  12    8.70    5.80
  -3  -7 -13    8.40    6.50
  -3  -7 -13    5.20    4.90
   3   7  13  -11.60    8.00
   3   7  13    5.80    6.30
  -3  -7 -14   84.49    8.20
   3   7  14   55.89   10.40
   3   7  14   93.69    8.10
  -3  -7 -15   -1.40    7.20
   3   7  15   -1.30    6.70
  -3  -7 -16   -4.40    7.50
   3   7  16   -1.20    7.30
  -3  -7 -17    5.20    8.30
  -3  -7 -18   17.80    9.10
  -3  -6  20   -3.80    9.10
   3   6 -20  -15.00    8.80
  -3  -6  19   28.10    9.20
   3   6 -19   34.80    9.30
  -3  -6  18   -6.40    8.20
   3   6 -18   -3.60    8.20
  -3  -6  17    7.00    8.00
  -3  -6  17   36.70   10.60
   3   6 -17   23.90    8.20
  -3  -6  16   17.20    9.40
  -3  -6  16   -7.80    7.50
   3   6 -16    0.20    7.20
  -3  -6  15    2.20    8.20
  -3  -6  15   -5.80    6.90
   3   6 -15   -6.80    6.80
  -3  -6  14    6.20    7.80
  -3  -6  14   17.20    6.70
   3   6 -14   -0.40    6.50
  -3  -6  13    7.70    6.40
  -3  -6  13   13.60    7.20
   3   6 -13    5.10    5.90
  -3  -6  12   26.50    6.90
  -3  -6  12   19.40    5.80
   3   6 -12   16.90    5.70
  -3  -6  11  565.84   21.00
  -3  -6  11  571.94   17.60
   3   6 -11  581.34   17.70
  -3  -6  10   -3.10    4.50
  -3  -6  10   -3.00    5.10
   3   6 -10   -2.40    4.40
   3   6 -10   -0.90    4.00
   3   6 -10    0.10    4.60
  -3  -6   9   74.09    6.90
  -3  -6   9   70.89    7.80
  -3  -6   9   68.79    5.60
   3   6  -9   68.19    7.20
   3   6  -9   64.49    5.50
   3   6  -9   62.69    5.20
  -3  -6   8  100.59    7.40
  -3  -6   8   98.89    7.70
  -3  -6   8  100.59    7.10
   3   6  -8   92.19    7.30
   3   6  -8   94.39    7.10
   3   6  -8   98.69    7.30
  -3  -6   7 1236.88   39.30
  -3  -6   7 1279.37   32.30
  -3  -6   7 1330.17   32.40
   3   6  -7 1317.67   32.30
   3   6  -7 1293.57   32.30
   3   6  -7 1258.77   39.30
  -3  -6   6   -0.60    3.30
  -3  -6   6   -7.80    3.20
   3   6  -6   -5.50    3.10
   3   6  -6   -4.80    3.50
   3   6  -6    0.20    2.90
  -3  -6   5   29.60    3.80
  -3  -6   5   31.20    3.70
  -3  -6   5   32.20    3.50
   3   6  -5   25.50    3.70
   3   6  -5   28.90    3.50
  -3  -6   4  104.59    7.00
  -3  -6   4  111.99    6.20
   3   6  -4  112.69    6.00
   3   6  -4  118.49    6.30
  -3  -6   3  676.43   17.30
  -3  -6   3  650.53   17.40
  -3  -6   3  649.83   19.70
   3   6  -3  660.63   17.30
  -3  -6   2   11.70    2.80
  -3  -6   2   15.40    3.10
  -3  -6   2    9.40    3.70
   3   6  -2   13.50    3.10
  -3  -6   1   42.30    4.40
  -3  -6   1   41.70    3.50
  -3  -6   1   34.50    3.10
   3   6  -1   42.80    4.70
   3   6  -1   39.40    3.40
  -3  -6   0    9.60    3.70
  -3  -6   0    9.70    2.90
  -3  -6   0    3.70    2.60
   3   6   0    8.00    2.70
   3   6   0   11.60    2.50
   3   6   0    6.90    4.00
  -3  -6  -1 1043.60   25.90
  -3  -6  -1 1076.09   29.50
  -3  -6  -1 1031.00   25.80
   3   6   1 1013.90   25.70
   3   6   1 1045.20   25.80
   3   6   1 1034.30   29.40
  -3  -6  -2   13.40    2.90
  -3  -6  -2   17.80    3.20
   3   6   2   13.30    2.80
   3   6   2   14.00    4.10
   3   6   2   16.30    4.60
   3   6   2   12.30    2.90
  -3  -6  -3   95.19    5.70
  -3  -6  -3   85.59    5.50
  -3  -6  -3   95.49    5.80
   3   6   3  101.29   10.00
   3   6   3   83.69    5.40
   3   6   3   90.69    5.70
   3   6   3  100.89    7.40
  -3  -6  -4    2.10    2.90
  -3  -6  -4   10.30    3.20
  -3  -6  -4    1.40    3.10
   3   6   4    3.60    2.90
   3   6   4   13.40    5.20
   3   6   4    6.60    3.20
  -3  -6  -5  544.25   15.10
  -3  -6  -5  538.75   15.10
   3   6   5  566.84   15.10
   3   6   5  554.64   15.20
   3   6   5  505.35   25.90
  -3  -6  -6   18.50    4.10
  -3  -6  -6   20.10    3.50
  -3  -6  -6   10.70    3.50
   3   6   6   14.80    5.50
   3   6   6   16.40    3.70
   3   6   6   11.40    3.10
  -3  -6  -7   22.70    3.50
  -3  -6  -7   16.50    3.40
  -3  -6  -7   22.80    4.80
   3   6   7   21.50    3.80
   3   6   7   22.30    3.50
   3   6   7   20.90    5.90
  -3  -6  -8   99.19    6.60
  -3  -6  -8  104.19    7.40
  -3  -6  -8  113.29    8.60
   3   6   8   88.19   11.20
   3   6   8   98.19    6.60
   3   6   8  119.09    8.80
   3   6   8  104.09    7.40
  -3  -6  -9  213.98   11.50
  -3  -6  -9  228.18    9.90
   3   6   9  204.18   15.20
   3   6   9  210.98   11.70
   3   6   9  226.28    9.80
  -3  -6 -10    7.70    4.10
  -3  -6 -10   -6.50    2.40
   3   6  10   -0.10    4.50
   3   6  10   -3.60    6.50
  -3  -6 -11   95.79    7.60
  -3  -6 -11   99.89    8.70
   3   6  11  103.69    8.90
  -3  -6 -12   -3.80    5.10
  -3  -6 -12    6.60    4.50
   3   6  12    5.00    5.60
  -3  -6 -13   56.59    5.90
  -3  -6 -13   62.59    7.10
   3   6  13   44.80    6.70
  -3  -6 -14   22.70    5.30
  -3  -6 -14   27.60    7.00
   3   6  14   26.80    6.70
  -3  -6 -15   14.10    7.40
   3   6  15    9.20    6.80
  -3  -6 -16    3.50    7.80
   3   6  16    5.20    7.10
  -3  -6 -17  101.19   10.30
   3   6  17   98.09   10.30
  -3  -6 -18   -8.40    8.40
  -3  -6 -19   12.10    9.70
  -3  -5  20   19.10    9.30
   3   5 -20   15.70    9.10
  -3  -5  19    3.10   11.50
  -3  -5  19   -3.60    8.40
   3   5 -19   -2.10    8.40
  -3  -5  18   75.99   12.30
  -3  -5  18   70.89    9.30
   3   5 -18   76.39    9.30
  -3  -5  17    8.80    9.50
  -3  -5  17    2.70    7.80
   3   5 -17   -5.10    7.60
  -3  -5  16    7.10    8.90
  -3  -5  16  -14.10    7.10
   3   5 -16    2.60    7.20
  -3  -5  15   -2.00    6.80
  -3  -5  15    4.20    8.20
   3   5 -15   -3.60    6.70
  -3  -5  14   80.19    9.60
  -3  -5  14   82.49    7.90
   3   5 -14   74.39    7.60
  -3  -5  13    5.70    6.00
  -3  -5  13   10.80    7.30
   3   5 -13    6.60    5.70
  -3  -5  12    9.40    5.40
  -3  -5  12   18.40    6.60
   3   5 -12   16.00    4.90
   3   5 -12    7.60    5.30
  -3  -5  11    6.20    5.80
  -3  -5  11    3.80    4.80
   3   5 -11   -0.50    4.70
   3   5 -11   -5.20    4.30
   3   5 -11   -2.20    4.70
  -3  -5  10  501.05   15.10
  -3  -5  10  508.65   15.40
[truncated: 1,520,576 more chars]
