# Supplementary material for: Structural Diversity and Carbon Dioxide Sorption Selectivity of Zinc(II) Metal-Organic Frameworks Based on Bis(1,2,4-triazol-1-yl)methane and Terephthalic Acid
Source: Molecules. 2022 Oct 1;27(19):6481. doi: 10.3390/molecules27196481 (PMC9571910; doi:10.3390/molecules27196481)
Supplement: Supplementary file 1 [file molecules-27-06481-s001.zip › Supplementary Materials.pdf]

## Supplementary Materials

# Structural diversity and carbon dioxide sorption selectivity of zinc(II) metal-organic frameworks based on bis(1,2,4-triazol-1-yl)methane and terephthalic acid

Taisiya S. Sukhikh <sup>1</sup>, Evgeny Yu. Filatov <sup>1</sup>, Alexey A. Ryadun <sup>1</sup>, Konstantin A. Kovalenko <sup>1</sup> and Andrei S. Potapov <sup>1,\*</sup>

<sup>1</sup> Nikolaev Institute of Inorganic Chemistry, Siberian Branch of the Russian Academy of Sciences, 3 Lavrentiev Ave., 630090 Novosibirsk, Russia

\* Correspondence: potapov@niic.nsc.ru; Tel.: +7 (383) 330-94-90

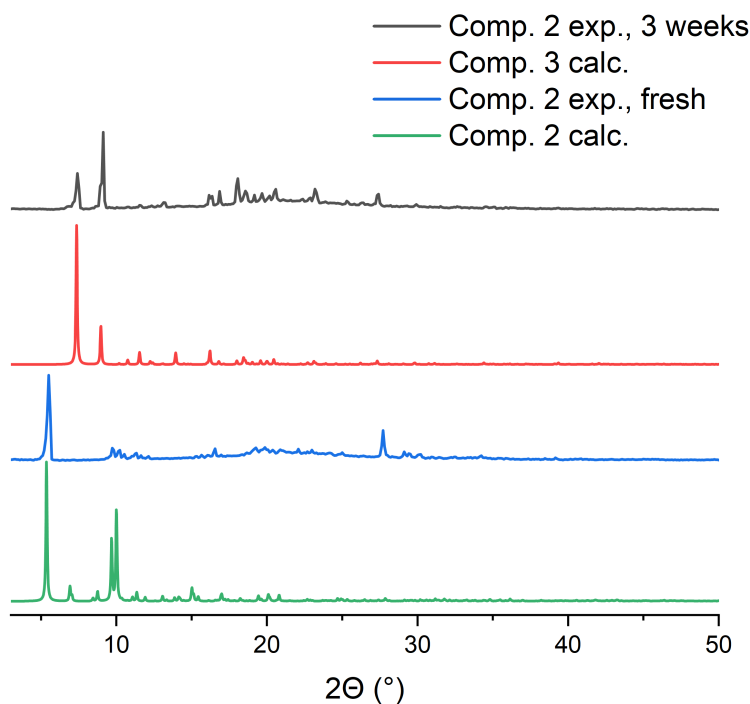

**Figure S1.** Calculated and experimental XRD patterns of MOF 2 and the product of its transformation after storing under DMF.

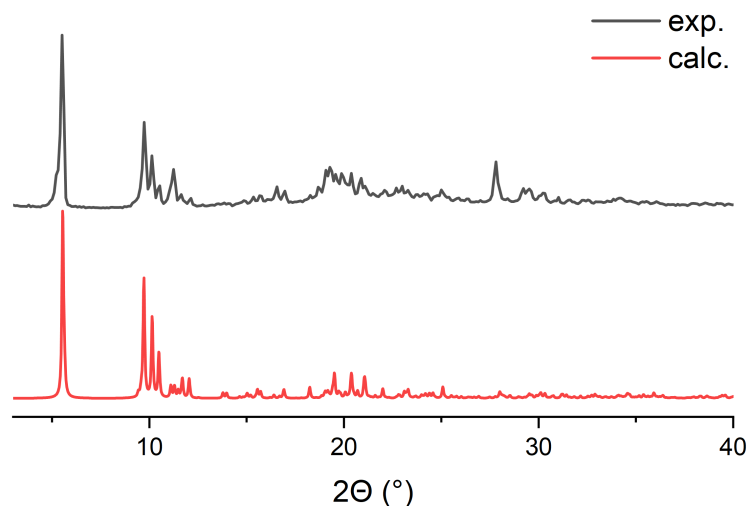

**Figure S2.** Calculated and experimental XRD patterns of MOF 1.

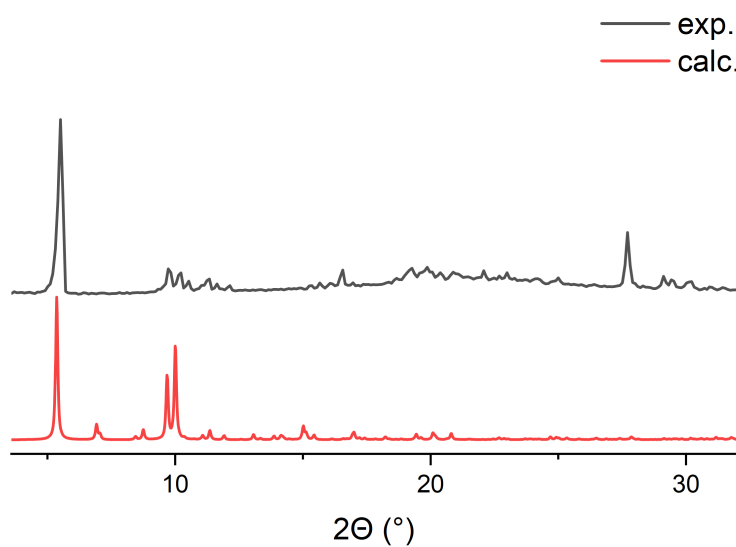

**Figure S3.** Calculated and experimental XRD patterns of MOF 2.

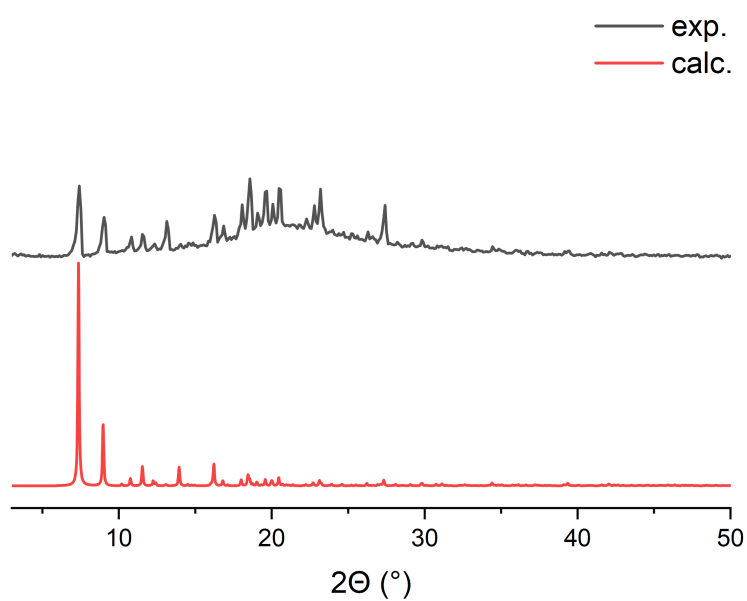

**Figure S4.** Calculated and experimental XRD patterns of MOF 3.

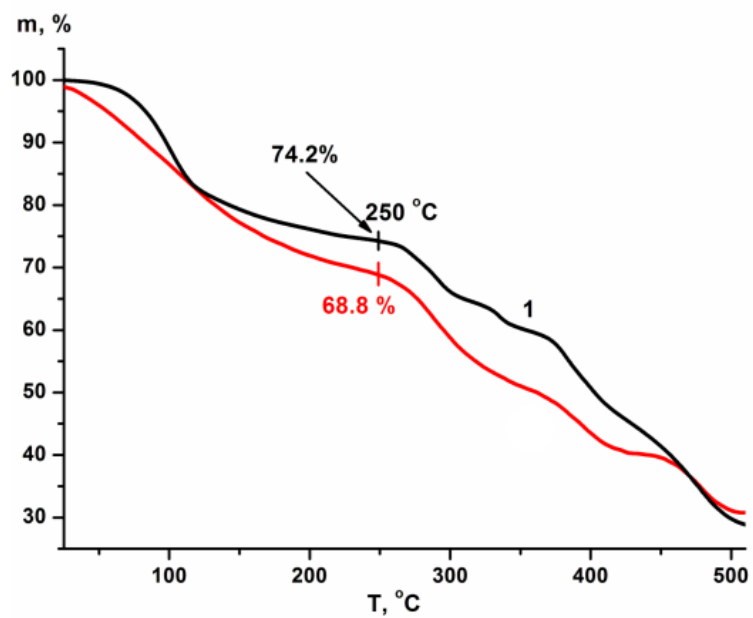

Figure S5. TGA curves of MOFs 1 and 3a.

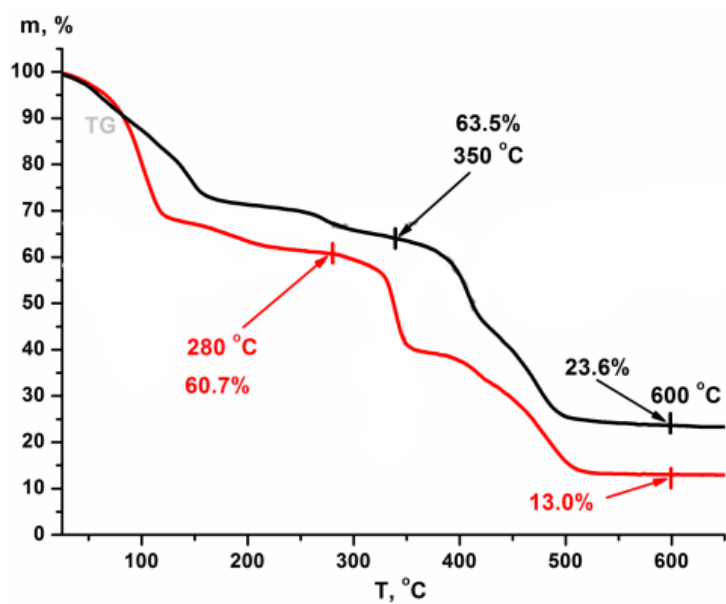

Figure S6. TGA curves of MOFs 1 and 3a.

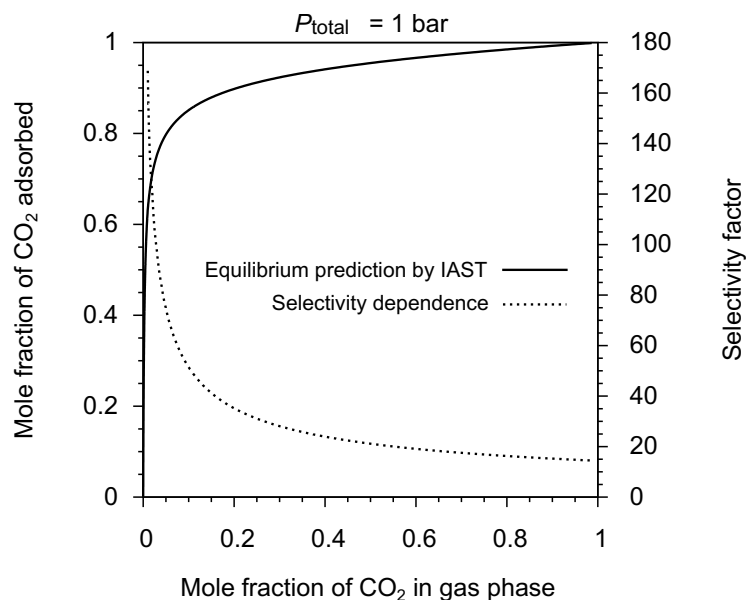

**Figure S7.** The adsorption equilibrium prediction by IAST for CO<sub>2</sub>/N<sub>2</sub> binary mixture on MOF 1 (solid line) and the dependence of CO<sub>2</sub>/N<sub>2</sub> adsorption selectivity (dotted line).

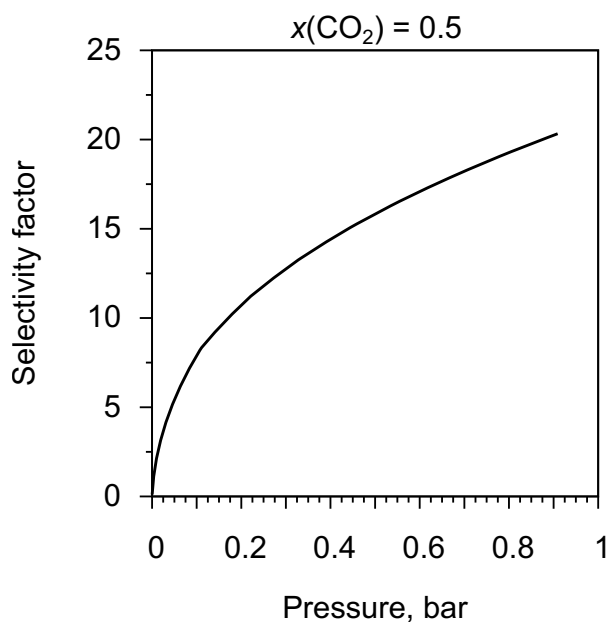

**Figure S8.** The dependence of CO<sub>2</sub>/N<sub>2</sub> adsorption selectivity factor on the total pressure of equimolar gas mixture.

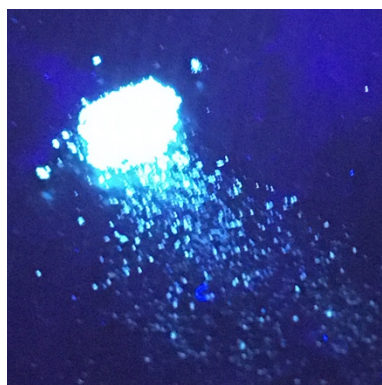

MOF 1

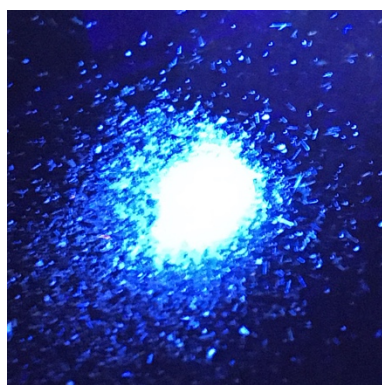

MOF 2

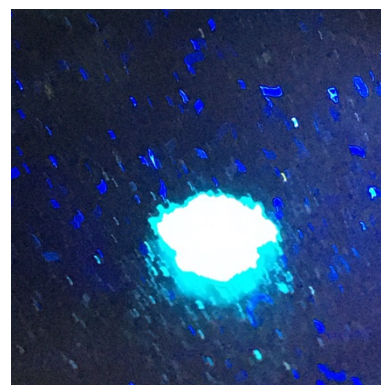

MOF 3

**Figure S9.** Photographic images of the luminescence of MOFs 1-3 under 365 nm UV light.

**Table S1.** Carbon dioxide and nitrogen uptakes by MOF 1 at 1 bar and 273 K.

| Uptake | CO <sub>2</sub> | N <sub>2</sub> |
|--------|-----------------|----------------|
|        | 273 K           | 273 K          |
| mL/g   | 17.9            | 1.6            |
| mmol/g | 0.799           | 0.071          |

**Table S2.** Henry constants for gas adsorption by MOF 1 at 273 K.

| K <sub>H</sub>                          | CO <sub>2</sub> | N <sub>2</sub>                 |
|-----------------------------------------|-----------------|--------------------------------|
|                                         | 273 K           | 273 K                          |
| mL·g <sup>-1</sup> ·torr <sup>-1</sup>  | 0.094±0.007     | (2.489±0.011)·10 <sup>-3</sup> |
| mmol·g <sup>-1</sup> ·bar <sup>-1</sup> | 3.15±0.23       | 0.08333±0.0004                 |

**Table S3.** Adsorption isotherms models for IAST calculations.

| Compound | 273 K                                                                                                   |                                                                            |
|----------|---------------------------------------------------------------------------------------------------------|----------------------------------------------------------------------------|
|          | CO <sub>2</sub>                                                                                         | N <sub>2</sub>                                                             |
| <b>1</b> | LF <sup>a</sup><br>$w = 28.43 \pm 0.19$<br>$b = (7.90 \pm 0.11) \cdot 10^{-3}$<br>$t = 1.235 \pm 0.007$ | L <sup>b</sup><br>$w = 8.5 \pm 0.4$<br>$b = (3.13 \pm 0.18) \cdot 10^{-4}$ |

<sup>a</sup> Langmuir-Freundlich equation  $n[\text{mL/g}] = \frac{wbp[\text{torr}]^{1/t}}{1+bp[\text{torr}]^{1/t}}$ ;

<sup>b</sup> Langmuir equation  $n[\text{mL/g}] = \frac{wbp[\text{torr}]}{1+bp[\text{torr}]}$ .

**Table S4.** Crystal data and structure refinement for the compounds.

| Identification code                                          | 1·4.5DMF                                                                                | 2·8DMF                                                                         | 3·3DMF                                                                       | 3a·3DMF                                                                      |
|--------------------------------------------------------------|-----------------------------------------------------------------------------------------|--------------------------------------------------------------------------------|------------------------------------------------------------------------------|------------------------------------------------------------------------------|
| Empirical formula                                            | C <sub>45.5</sub> H <sub>56.5</sub> N <sub>11.5</sub> O <sub>17.5</sub> Zn <sub>3</sub> | C <sub>29</sub> H <sub>18</sub> N <sub>6</sub> O <sub>12</sub> Zn <sub>3</sub> | C <sub>13</sub> H <sub>10</sub> N <sub>6</sub> O <sub>4</sub> Zn             | C <sub>22</sub> H <sub>31</sub> N <sub>9</sub> O <sub>7</sub> Zn             |
| Formula weight                                               | 1240.67                                                                                 | 1423.4                                                                         | 598.9                                                                        | 598.93                                                                       |
| Temperature/K                                                | 150(2)                                                                                  | 298(2)                                                                         | 298(2)                                                                       | 150(2)                                                                       |
| Space group                                                  | <i>P</i> -1                                                                             | <i>Pbca</i>                                                                    | <i>C2/c</i>                                                                  | <i>P2<sub>1</sub>/c</i>                                                      |
| <i>a</i> /Å                                                  | 9.7232(13)                                                                              | 20.1879(7)                                                                     | 23.893(3)                                                                    | 19.9831(15)                                                                  |
| <i>b</i> /Å                                                  | 18.204(3)                                                                               | 18.2491(6)                                                                     | 16.604(3)                                                                    | 16.6095(13)                                                                  |
| <i>c</i> /Å                                                  | 18.626(3)                                                                               | 32.9335(10)                                                                    | 17.746(3)                                                                    | 17.4898(13)                                                                  |
| $\alpha$ /°                                                  | 117.577(4)                                                                              | 90                                                                             | 90                                                                           | 90                                                                           |
| $\beta$ /°                                                   | 102.500(5)                                                                              | 90                                                                             | 124.479(7)                                                                   | 102.142(2)                                                                   |
| $\gamma$ /°                                                  | 92.264(5)                                                                               | 90                                                                             | 90                                                                           | 90                                                                           |
| Volume/Å <sup>3</sup>                                        | 2815.6(7)                                                                               | 12133.1(7)                                                                     | 5803.7(14)                                                                   | 5675.2(7)                                                                    |
| Z                                                            | 2                                                                                       | 8                                                                              | 8                                                                            | 8                                                                            |
| $\rho_{\text{calc}}$ /cm <sup>3</sup>                        | 1.463                                                                                   | 1.558                                                                          | 1.371                                                                        | 1.402                                                                        |
| $\mu$ /mm <sup>-1</sup>                                      | 1.338                                                                                   | 1.215                                                                          | 0.863                                                                        | 0.921                                                                        |
| F(000)                                                       | 1200.0                                                                                  | 3360.0                                                                         | 1536.0                                                                       | 2496.0                                                                       |
| Crystal size/mm <sup>3</sup>                                 | 0.35 × 0.25 × 0.1                                                                       | 0.2 × 0.1 × 0.1                                                                | 0.3 × 0.2 × 0.1                                                              | 0.26 × 0.15 × 0.08                                                           |
| Radiation                                                    | MoK $\alpha$ ( $\lambda$ = 0.71073)                                                     | MoK $\alpha$ ( $\lambda$ = 0.71073)                                            | MoK $\alpha$ ( $\lambda$ = 0.71073)                                          | MoK $\alpha$ ( $\lambda$ = 0.71073)                                          |
| 2 $\Theta$ range for data collection/°                       | 4.348 to 51.638                                                                         | 3.192 to 48.81                                                                 | 3.208 to 48.806                                                              | 2.084 to 48.812                                                              |
|                                                              | -11 ≤ <i>h</i> ≤ 11                                                                     | -23 ≤ <i>h</i> ≤ 22                                                            | -27 ≤ <i>h</i> ≤ 27                                                          | -23 ≤ <i>h</i> ≤ 23                                                          |
| Index ranges                                                 | -22 ≤ <i>k</i> ≤ 22                                                                     | -21 ≤ <i>k</i> ≤ 13                                                            | -19 ≤ <i>k</i> ≤ 19                                                          | -19 ≤ <i>k</i> ≤ 19                                                          |
|                                                              | -22 ≤ <i>l</i> ≤ 22                                                                     | -38 ≤ <i>l</i> ≤ 38                                                            | -16 ≤ <i>l</i> ≤ 20                                                          | -20 ≤ <i>l</i> ≤ 20                                                          |
| Reflections collected                                        | 38194                                                                                   | 70277                                                                          | 28348                                                                        | 57338                                                                        |
| Independent reflections                                      | 10769 [ <i>R</i> <sub>int</sub> = 0.0238, <i>R</i> <sub>sigma</sub> = 0.0235]           | 9982 [ <i>R</i> <sub>int</sub> = 0.0594, <i>R</i> <sub>sigma</sub> = 0.0379]   | 4771 [ <i>R</i> <sub>int</sub> = 0.0577, <i>R</i> <sub>sigma</sub> = 0.0413] | 9328 [ <i>R</i> <sub>int</sub> = 0.0671, <i>R</i> <sub>sigma</sub> = 0.0558] |
| Data/restraints/parameters                                   | 10769/51/601                                                                            | 9982/81/451                                                                    | 4771/24/239                                                                  | 9328/0/715                                                                   |
| Goodness-of-fit on <i>F</i> <sup>2</sup>                     | 1.060                                                                                   | 1.059                                                                          | 1.032                                                                        | 1.060                                                                        |
| Final <i>R</i> indexes [ <i>I</i> ≥ 2 $\sigma$ ( <i>I</i> )] | <i>R</i> <sub>1</sub> = 0.0577, <i>wR</i> <sub>2</sub> = 0.1695                         | <i>R</i> <sub>1</sub> = 0.0788, <i>wR</i> <sub>2</sub> = 0.2107                | <i>R</i> <sub>1</sub> = 0.0668, <i>wR</i> <sub>2</sub> = 0.1997              | <i>R</i> <sub>1</sub> = 0.0506, <i>wR</i> <sub>2</sub> = 0.1316              |
| Final <i>R</i> indexes [all data]                            | <i>R</i> <sub>1</sub> = 0.0661, <i>wR</i> <sub>2</sub> = 0.1782                         | <i>R</i> <sub>1</sub> = 0.0889, <i>wR</i> <sub>2</sub> = 0.2172                | <i>R</i> <sub>1</sub> = 0.0846, <i>wR</i> <sub>2</sub> = 0.2197              | <i>R</i> <sub>1</sub> = 0.1102, <i>wR</i> <sub>2</sub> = 0.1681              |
| Largest diff. peak/hole / e Å <sup>-3</sup>                  | 1.98/-1.15                                                                              | 0.80/-1.23                                                                     | 0.87/-0.64                                                                   | 0.70/-0.53                                                                   |
